# Supplementary material for: Microglial Nox2 Plays a Key Role in the Pathogenesis of Experimental Autoimmune Encephalomyelitis
Source: Front Immunol. 2021 Apr 2;12:638381. doi: 10.3389/fimmu.2021.638381 (PMC8050344; doi:10.3389/fimmu.2021.638381)
Supplement: Supplementary file 3 [file Table_2.xlsx]

## Sheet: Comparison
Name	Mus_musculus.GRCm38.99	Chromosome	Region	Gene length	Exon length	Exons	GeneID	Gene description	GO Biological Process	GO Cellular Component	GO Molecular Function	KEGG Pathway	FoldChange - W_MOG10 / K_MOG10	FPKM - W_MOG10 - Mean (0 => 0.001)	FPKM - K-MoG10 (0 => 0.001)	>1 (Either FPKM of each group)	W_MOG10 - Mean	FPKM - K-MoG10	FPKM - W1-MoG10	FPKM - W2-MoG10	Total exon fragments - K-MoG10	Total exon fragments - W1-MoG10	Total exon fragments - W2-MoG10
Xkr4	protein_coding	chr1	complement(3199731..3671742)	472012	17.314	8	497097	X Kell blood group precursor related family member 4	GO:0043652 engulfment of apoptotic cell | GO:0070782 phosphatidylserine exposure on apoptotic cell surface | GO:1902742 apoptotic process involved in development	GO:0005886 plasma membrane | GO:0016020 membrane | GO:0016021 integral component of membrane	GO:0003674 molecular_function	-	2.02919	0.0049249	0.00242702		0.0049249	0.00242702	0.0021899	0.0076599	1	1	3
Gm18956	processed_pseudogene	chr1	3252734..3253236	503	0.503	0	100418032	predicted gene, 18956	-	-	-	-	1	0.001	0.001		0	0	0	0	0	0	0
LOC105243853	#N/A	chr1	3357323..3377812	20490	20.49	0	105243853	-	-	-	-	-	-6.15463	0.0246581	0.151761		0.0246581	0.151761	0.00185046	0.0474657	74	1	22
Gm7341	processed_pseudogene	chr1	3531795..3532736	942	0.942	0	664792	predicted gene 7341	-	-	-	-	1	0.001	0.001		0	0	0	0	0	0	0
LOC105242387	#N/A	chr1	complement(3630788..3670456)	39669	39.669	0	105242387	-	-	-	-	-	1	0.001	0.001		0	0	0	0	0	0	0
LOC105242467	#N/A	chr1	complement(3999403..4243365)	243963	3.941	23	105242467	-	-	-	-	-	1	0.001	0.001		0	0	0	0	0	0	0
Gm6101	processed_pseudogene	chr1	complement(4256235..4261541)	5307	5.307	0	619785	predicted gene 6101	-	-	-	-	-1.00768	2.71094	2.73175	1	2.71094	2.73175	2.2148	3.20709	345	310	385
Rp1	protein_coding	chr1	complement(4290846..4409266)	118421	9.772	8	19888	retinitis pigmentosa 1 (human)	GO:0007026 negative regulation of microtubule depolymerization | GO:0007601 visual perception | GO:0030030 cell projection organization | GO:0035082 axoneme assembly | GO:0035556 intracellular signal transduction | GO:0035845 photoreceptor cell outer segment organization | GO:0042461 photoreceptor cell development | GO:0045494 photoreceptor cell maintenance | GO:0046548 retinal rod cell developme…	GO:0001750 photoreceptor outer segment | GO:0001917 photoreceptor inner segment | GO:0005737 cytoplasm | GO:0005856 cytoskeleton | GO:0005875 microtubule associated complex | GO:0005929 cilium | GO:0005930 axoneme | GO:0032391 photoreceptor connecting cilium | GO:0042995 cell projection | GO:0097542 ciliary tip | GO:0097733 photoreceptor cell cilium	GO:0008017 microtubule binding	-	-5.70326	0.00452393	0.0258011		0.00452393	0.0258011	0	0.00904786	6	0	2
Sox17	protein_coding	chr1	complement(4490928..4497388)	6461	5.641	13	20671	SRY (sex determining region Y)-box 17	GO:0001525 angiogenesis | GO:0001570 vasculogenesis | GO:0001656 metanephros development | GO:0001706 endoderm formation | GO:0001828 inner cell mass cellular morphogenesis | GO:0001947 heart looping | GO:0003142 cardiogenic plate morphogenesis | GO:0003143 embryonic heart tube morphogenesis | GO:0003151 outflow tract morphogenesis | GO:0003308 negative regulation of Wnt signaling pathway involve…	GO:0005634 nucleus | GO:0005667 transcription factor complex | GO:0044798 nuclear transcription factor complex	GO:0000981 DNA-binding transcription factor activity, RNA polymerase II-specific | GO:0001228 DNA-binding transcription activator activity, RNA polymerase II-specific | GO:0003677 DNA binding | GO:0003700 DNA-binding transcription factor activity | GO:0003713 transcription coactivator activity | GO:0005515 protein binding | GO:0008013 beta-catenin binding | GO:0008134 transcription factor binding…	mmu04310 Wnt signaling pathway	-1.26739	0.0117553	0.0148986		0.0117553	0.0148986	0	0.0235106	2	0	3
Gm7357	processed_pseudogene	chr1	4522817..4526931	4115	4.115	0	664830	predicted gene 7357	-	-	-	-	18428.1	0.0184281	0.001		0.0184281	0	0.0368563	0	0	4	0
LOC105243855	#N/A	chr1	complement(4583127..4586737)	3611	3.611	0	105243855	-	-	-	-	-	1	0.001	0.001		0	0	0	0	0	0	0
LOC105243854	#N/A	chr1	4595021..4602832	7812	7.812	0	105243854	-	-	-	-	-	1.47822	0.0238545	0.0161373		0.0238545	0.0161373	0.0194142	0.0282948	3	4	5
Gm7369	processed_pseudogene	chr1	4609962..4611630	1669	1.669	0	664853	-	-	-	-	-	-1.90109	0.0132438	0.0251776		0.0132438	0.0251776	0	0.0264876	1	0	1
Gm29874	#N/A	chr1	4616900..4617805	906	0.906	0	102631571	-	-	-	-	-	1	0.001	0.001		0	0	0	0	0	0	0
Gm6085	processed_pseudogene	chr1	complement(4688569..4689409)	841	0.841	0	619596	predicted gene 6085	-	-	-	-	-49966.1	0.001	0.0499661		0	0.0499661	0	0	1	0	0
Gm6119	processed_pseudogene	chr1	complement(4692219..4693424)	1206	1.206	0	619980	predicted gene 6119	-	-	-	-	18328.3	0.0183283	0.001		0.0183283	0	0	0.0366566	0	0	1
Gm2053	processed_pseudogene	chr1	complement(4735049..4735678)	630	0.63	0	100039121	predicted gene 2053	-	-	-	-	3.6821	0.245599	0.0667007		0.245599	0.0667007	0	0.491198	1	0	7
Gm6123	processed_pseudogene	chr1	4771105..4772393	1289	1.289	0	620009	predicted gene 6123	-	-	-	-	1	0.001	0.001		0	0	0	0	0	0	0
Mrpl15	protein_coding	chr1	complement(4773198..4785745)	12548	6.569	8	27395	mitochondrial ribosomal protein L15	GO:0000002 mitochondrial genome maintenance | GO:0006412 translation | GO:1990830 cellular response to leukemia inhibitory factor	GO:0005739 mitochondrion | GO:0005762 mitochondrial large ribosomal subunit | GO:0005840 ribosome | GO:0015934 large ribosomal subunit	GO:0003735 structural constituent of ribosome	mmu03010 Ribosome	-1.05231	0.747708	0.786823		0.747708	0.786823	0.721493	0.773923	123	125	115
Lypla1	protein_coding	chr1	4807563..4846737	39175	2.765	12	18777	lysophospholipase 1	GO:0002084 protein depalmitoylation | GO:0006629 lipid metabolic process | GO:0006631 fatty acid metabolic process | GO:0042997 negative regulation of Golgi to plasma membrane protein transport	GO:0005737 cytoplasm | GO:0005739 mitochondrion | GO:0005783 endoplasmic reticulum | GO:0005829 cytosol | GO:0005886 plasma membrane | GO:0031965 nuclear membrane	GO:0004620 phospholipase activity | GO:0004622 lysophospholipase activity | GO:0008474 palmitoyl-(protein) hydrolase activity | GO:0016298 lipase activity | GO:0016787 hydrolase activity | GO:0052689 carboxylic ester hydrolase activity	mmu00564 Glycerophospholipid metabolism | mmu05231 Choline metabolism in cancer	-1.94892	9.31077	18.146	1	9.31077	18.146	10.5314	8.09011	1194	768	506
LOC105243856	#N/A	chr1	4846846..4848409	1564	1.564	0	105243856	-	-	-	-	-	310977	0.310977	0.001		0.310977	0	0.1697	0.452254	0	7	16
Tcea1	protein_coding	chr1	4857694..4897909	40216	3.175	13	21399	transcription elongation factor A (SII) 1	GO:0006351 transcription, DNA-templated | GO:0006355 regulation of transcription, DNA-templated | GO:0030218 erythrocyte differentiation | GO:0045893 positive regulation of transcription, DNA-templated | GO:0045944 positive regulation of transcription by RNA polymerase II	GO:0005634 nucleus | GO:0005654 nucleoplasm | GO:0005669 transcription factor TFIID complex | GO:0005730 nucleolus	GO:0003676 nucleic acid binding | GO:0003677 DNA binding | GO:0005515 protein binding | GO:0008270 zinc ion binding | GO:0046872 metal ion binding	-	-1.90394	7.90378	15.0483	1	7.90378	15.0483	6.68753	9.12004	1137	560	655
Gm6104	processed_pseudogene	chr1	complement(4879202..4880747)	1546	1.546	0	619829	predicted gene 6104	-	-	-	-	-27180.8	0.001	0.0271808		0	0.0271808	0	0	1	0	0
Rgs20	protein_coding	chr1	complement(4909573..5070308)	160736	3.692	16	58175	regulator of G-protein signaling 20	GO:0007186 G protein-coupled receptor signaling pathway | GO:0009968 negative regulation of signal transduction	GO:0005634 nucleus | GO:0005737 cytoplasm | GO:0005794 Golgi apparatus | GO:0005802 trans-Golgi network | GO:0016020 membrane	GO:0005096 GTPase activator activity	-	41056.7	0.0410567	0.001		0.0410567	0	0.0102697	0.0718437	0	1	6
Gm16041	lncRNA	chr1	4968430..4977005	8576	8.576	0	102631647	-	-	-	-	-	59280.6	0.0592806	0.001		0.0592806	0	0	0.118561	0	0	23
Gm17101	processed_pseudogene	chr1	5063061..5064658	1598	1.598	0	100417473	predicted gene 17101	-	-	-	-	1	0.001	0.001		0	0	0	0	0	0	0
Atp6v1h	protein_coding	chr1	5082978..5162549	79572	3.758	24	108664	ATPase, H+ transporting, lysosomal V1 subunit H	GO:0006811 ion transport | GO:0006897 endocytosis | GO:1902600 proton transmembrane transport	GO:0000221 vacuolar proton-transporting V-type ATPase, V1 domain	GO:0046961 proton-transporting ATPase activity, rotational mechanism	mmu00190 Oxidative phosphorylation | mmu01100 Metabolic pathways | mmu04142 Lysosome | mmu04145 Phagosome | mmu04721 Synaptic vesicle cycle | mmu05152 Tuberculosis | mmu05323 Rheumatoid arthritis	-2.34353	5.19126	12.1659	1	5.19126	12.1659	5.84175	4.54077	1088	579	386
Gm7182	processed_pseudogene	chr1	complement(5276110..5276798)	689	0.689	0	636659	predicted gene 7182	-	-	-	-	1	0.001	0.001		0	0	0	0	0	0	0
Gm19070	#N/A	chr1	complement(5319710..5320327)	618	0.618	0	100418201	predicted gene, 19070	-	-	-	-	1	0.001	0.001		0	0	0	0	0	0	0
Oprk1	protein_coding	chr1	5588450..5606134	17685	4.751	7	18387	opioid receptor, kappa 1	GO:0006955 immune response | GO:0007165 signal transduction | GO:0007186 G protein-coupled receptor signaling pathway | GO:0007200 phospholipase C-activating G protein-coupled receptor signaling pathway | GO:0007218 neuropeptide signaling pathway | GO:0007610 behavior | GO:0007626 locomotory behavior | GO:0019233 sensory perception of pain | GO:0031635 adenylate cyclase-inhibiting opioid receptor…	GO:0005654 nucleoplasm | GO:0005829 cytosol | GO:0005886 plasma membrane | GO:0005887 integral component of plasma membrane | GO:0016020 membrane | GO:0016021 integral component of membrane | GO:0030285 integral component of synaptic vesicle membrane | GO:0030425 dendrite | GO:0043005 neuron projection | GO:0043025 neuronal cell body | GO:0043204 perikaryon | GO:0043679 axon terminus | GO:0045202…	GO:0004930 G protein-coupled receptor activity | GO:0004985 opioid receptor activity | GO:0033612 receptor serine/threonine kinase binding | GO:0038048 dynorphin receptor activity | GO:0042277 peptide binding | GO:0042923 neuropeptide binding	mmu04080 Neuroactive ligand-receptor interaction	-8844.76	0.001	0.00884476		0	0.00884476	0	0	1	0	0
Npbwr1	protein_coding	chr1	complement(5913707..5917398)	3692	3.692	1	226304	neuropeptides B/W receptor 1	GO:0007165 signal transduction | GO:0007186 G protein-coupled receptor signaling pathway | GO:0007218 neuropeptide signaling pathway | GO:0019222 regulation of metabolic process	GO:0005886 plasma membrane | GO:0005887 integral component of plasma membrane | GO:0016020 membrane | GO:0016021 integral component of membrane | GO:0043005 neuron projection	GO:0004930 G protein-coupled receptor activity | GO:0008188 neuropeptide receptor activity | GO:0042277 peptide binding | GO:0042923 neuropeptide binding	mmu04080 Neuroactive ligand-receptor interaction	1.18028	0.134337	0.113818		0.134337	0.113818	0.184855	0.0838177	10	18	7
Gm19214	processed_pseudogene	chr1	complement(6048972..6050045)	1074	1.074	0	100418441	predicted gene, 19214	-	-	-	-	1	0.001	0.001		0	0	0	0	0	0	0
4732440D04Rik	lncRNA	chr1	complement(6209863..6214590)	4728	4.728	0	654788	-	GO:0008150 biological_process	GO:0005575 cellular_component	GO:0003674 molecular_function	-	-1.11943	0.889231	0.995432		0.889231	0.995432	0.946293	0.832169	112	118	89
Rb1cc1	protein_coding	chr1	6214642..6276372	61731	7.784	31	12421	RB1-inducible coiled-coil 1	GO:0000045 autophagosome assembly | GO:0000422 autophagy of mitochondrion | GO:0001889 liver development | GO:0001934 positive regulation of protein phosphorylation | GO:0006914 autophagy | GO:0007049 cell cycle | GO:0007507 heart development | GO:0030242 autophagy of peroxisome | GO:0034727 piecemeal microautophagy of the nucleus | GO:0043066 negative regulation of apoptotic process | GO:0045793…	GO:0000407 phagophore assembly site | GO:0005634 nucleus | GO:0005737 cytoplasm | GO:0005764 lysosome | GO:0005829 cytosol | GO:0019898 extrinsic component of membrane | GO:0031965 nuclear membrane | GO:0034045 phagophore assembly site membrane | GO:1990316 Atg1/ULK1 kinase complex	GO:0005515 protein binding | GO:0019901 protein kinase binding | GO:0060090 molecular adaptor activity	-	-2.05583	3.35067	6.88841	1	3.35067	6.88841	3.52661	3.17474	1276	724	559
Fam150a	#N/A	chr1	6359331..6394731	35401	0.858	5	620393	family with sequence similarity 150, member A	GO:0010976 positive regulation of neuron projection development | GO:0070374 positive regulation of ERK1 and ERK2 cascade | GO:0070378 positive regulation of ERK5 cascade	GO:0005575 cellular_component | GO:0005576 extracellular region	GO:0030298 receptor signaling protein tyrosine kinase activator activity | GO:0030971 receptor tyrosine kinase binding	-	1	0.001	0.001		0	0	0	0	0	0	0
Gm2147	processed_pseudogene	chr1	6380274..6382392	2119	2.119	0	100039302	predicted gene 2147	-	-	-	-	1	0.001	0.001		0	0	0	0	0	0	0
LOC102631893	#N/A	chr1	complement(6382084..6383180)	1097	1.097	0	102631893	-	-	-	-	-	1	0.001	0.001		0	0	0	0	0	0	0
Gm19026	processed_pseudogene	chr1	complement(6429658..6441296)	11639	11.639	0	100418138	predicted gene, 19026	-	-	-	-	26587.7	0.0265877	0.001		0.0265877	0	0	0.0531755	0	0	14
St18	protein_coding	chr1	6487231..6860940	373710	8.009	33	240690	suppression of tumorigenicity 18	GO:0000122 negative regulation of transcription by RNA polymerase II | GO:0006355 regulation of transcription, DNA-templated | GO:0006357 regulation of transcription by RNA polymerase II | GO:0008285 negative regulation of cell population proliferation | GO:0033209 tumor necrosis factor-mediated signaling pathway | GO:0045944 positive regulation of transcription by RNA polymerase II | GO:0070102 …	GO:0005634 nucleus | GO:0032993 protein-DNA complex	GO:0000977 RNA polymerase II regulatory region sequence-specific DNA binding | GO:0000978 RNA polymerase II cis-regulatory region sequence-specific DNA binding | GO:0003677 DNA binding | GO:0008270 zinc ion binding | GO:0046872 metal ion binding | GO:0140110 transcription regulator activity	-	-1.95195	0.247293	0.482704		0.247293	0.482704	0.279315	0.215271	92	59	39
Gm7449	processed_pseudogene	chr1	6910560..6911218	659	0.659	0	665015	predicted gene 7449	-	-	-	-	57535.5	0.0575355	0.001		0.0575355	0	0.115071	0	0	2	0
LOC102641523	#N/A	chr1	6916525..6923588	7064	7.064	0	102641523	-	-	-	-	-	6.46451	0.115366	0.017846		0.115366	0.017846	0.118085	0.112647	3	22	18
Gm5694	processed_pseudogene	chr1	7035881..7037223	1343	1.343	0	435608	predicted gene 5694	-	-	-	-	148128	0.148128	0.001		0.148128	0	0	0.296255	0	0	9
Pcmtd1	protein_coding	chr1	7088891..7173628	84738	5.453	9	319263	protein-L-isoaspartate (D-aspartate) O-methyltransferase domain containing 1	GO:0006464 cellular protein modification process	GO:0005737 cytoplasm | GO:0016020 membrane	GO:0004719 protein-L-isoaspartate (D-aspartate) O-methyltransferase activity	-	1.59713	2.68307	1.67993	1	2.68307	1.67993	2.54488	2.82126	218	366	348
LOC105243857	#N/A	chr1	complement(7108569..7112601)	4033	4.033	0	105243857	-	-	-	-	-	102574	0.102574	0.001		0.102574	0	0.0188028	0.186346	0	2	17
Gm9826	processed_pseudogene	chr1	7177675..7179753	2079	2.079	0	545302	predicted gene 9826	-	-	-	-	9118.78	0.00911878	0.001		0.00911878	0	0.0182376	0	0	1	0
Nras-ps2	processed_pseudogene	chr1	complement(7188158..7190142)	1985	1.985	0	18178	neuroblastoma ras oncogene, pseudogene 2	-	-	-	-	1	0.001	0.001		0	0	0	0	0	0	0
Gm26901	lncRNA	chr1	complement(7314638..7398666)	84029	84.029	0	102632124	-	-	-	-	-	-1.09083	0.0353	0.0385064		0.0353	0.0385064	0.0437687	0.0268312	77	97	51
Gm19002	processed_pseudogene	chr1	7315451..7316462	1012	1.012	0	100418102	predicted gene, 19002	-	-	-	-	1	0.001	0.001		0	0	0	0	0	0	0
Gm18984	processed_pseudogene	chr1	7410956..7411995	1040	1.04	0	100418076	predicted gene, 18984	-	-	-	-	1	0.001	0.001		0	0	0	0	0	0	0
Gm7470	processed_pseudogene	chr1	7597370..7599482	2113	2.113	0	665063	predicted gene 7470	-	-	-	-	1	0.001	0.001		0	0	0	0	0	0	0
Rps2-ps2	processed_pseudogene	chr1	7664051..7665000	950	0.95	0	665069	ribosomal protein S2, pseudogene 2	-	-	-	-	1	0.001	0.001		0	0	0	0	0	0	0
Gm17903	#N/A	chr1	complement(7767622..7768739)	1118	1.118	0	100416072	predicted gene, 17903	-	-	-	-	1	0.001	0.001		0	0	0	0	0	0	0
LOC105243858	#N/A	chr1	complement(8108629..8122449)	13821	13.821	0	105243858	-	-	-	-	-	17364.7	0.0173647	0.001		0.0173647	0	0.00274335	0.031986	0	1	10
Sntg1	protein_coding	chr1	complement(8359739..9301061)	941323	8.518	27	71096	syntrophin, gamma 1	-	GO:0005622 intracellular | GO:0005634 nucleus | GO:0005737 cytoplasm | GO:0005856 cytoskeleton | GO:0016010 dystrophin-associated glycoprotein complex | GO:0032587 ruffle membrane	GO:0003779 actin binding | GO:0005198 structural molecule activity | GO:0008022 protein C-terminus binding	-	-4933.26	0.001	0.00493326		0	0.00493326	0	0	1	0	0
Gm15452	processed_pseudogene	chr1	complement(8791661..8792229)	569	0.569	0	100039474	predicted gene 15452	-	-	-	-	1	0.001	0.001		0	0	0	0	0	0	0
LOC102632599	#N/A	chr1	complement(8855112..8856334)	1223	1.223	0	102632599	-	-	-	-	-	1	0.001	0.001		0	0	0	0	0	0	0
LOC102632504	#N/A	chr1	8856558..8857402	845	0.845	0	102632504	-	-	-	-	-	1	0.001	0.001		0	0	0	0	0	0	0
LOC102632382	#N/A	chr1	complement(8962659..8963865)	1207	1.207	0	102632382	-	-	-	-	-	1	0.001	0.001		0	0	0	0	0	0	0
Gm6187	processed_pseudogene	chr1	complement(9396668..9400470)	3803	3.803	0	620853	-	-	-	-	-	1	0.001	0.001		0	0	0	0	0	0	0
Gm30719	#N/A	chr1	9437054..9438070	1017	1.017	0	102632723	-	-	-	-	-	1	0.001	0.001		0	0	0	0	0	0	0
Gm18299	processed_pseudogene	chr1	complement(9439771..9440432)	662	0.662	0	100416881	predicted gene, 18299	-	-	-	-	33389.6	0.0333896	0.001		0.0333896	0	0	0.0667792	0	0	1
Gm7512	processed_pseudogene	chr1	9450516..9451943	1428	1.428	0	665138	predicted gene 7512	-	-	-	-	1	0.001	0.001		0	0	0	0	0	0	0
Gm18300	processed_pseudogene	chr1	complement(9499359..9501514)	2156	2.156	0	100416882	predicted gene, 18300	-	-	-	-	1	0.001	0.001		0	0	0	0	0	0	0
Rrs1	protein_coding	chr1	9545408..9547455	2048	2.048	1	59014	RRS1 ribosome biogenesis regulator homolog (S. cerevisiae)	GO:0000027 ribosomal large subunit assembly | GO:0000055 ribosomal large subunit export from nucleus | GO:0000447 endonucleolytic cleavage in ITS1 to separate SSU-rRNA from 5.8S rRNA and LSU-rRNA from tricistronic rRNA transcript (SSU-rRNA, 5.8S rRNA, LSU-rRNA) | GO:0002244 hematopoietic progenitor cell differentiation | GO:0007080 mitotic metaphase plate congression | GO:0042254 ribosome biogene…	GO:0000794 condensed nuclear chromosome | GO:0001650 fibrillar center | GO:0005634 nucleus | GO:0005654 nucleoplasm | GO:0005730 nucleolus | GO:0005783 endoplasmic reticulum | GO:0030687 preribosome, large subunit precursor	GO:0005515 protein binding | GO:0008097 5S rRNA binding	-	2.34769	2.31219	0.984878	1	2.31219	0.984878	3.09177	1.5326	48	167	71
Adhfe1	protein_coding	chr1	9547969..9577968	30000	3.393	19	76187	alcohol dehydrogenase, iron containing, 1	GO:0006539 glutamate catabolic process via 2-oxoglutarate	GO:0005739 mitochondrion	GO:0004022 alcohol dehydrogenase (NAD+) activity | GO:0016491 oxidoreductase activity | GO:0046872 metal ion binding | GO:0047988 hydroxyacid-oxoacid transhydrogenase activity	-	-9.2077	0.0847377	0.78024		0.0847377	0.78024	0.156446	0.0130291	63	14	1
2610203C22Rik	lncRNA	chr1	complement(9560832..9631092)	70261	70.261	0	72481	RIKEN cDNA 2610203C22 gene	GO:0008150 biological_process	GO:0005575 cellular_component	GO:0003674 molecular_function	-	-18.689	0.0332177	0.620804		0.0332177	0.620804	0.0167289	0.0497064	1038	31	79
Gm6161	processed_pseudogene	chr1	9574536..9575865	1330	1.33	0	620542	predicted gene 6161	-	-	-	-	1	0.001	0.001		0	0	0	0	0	0	0
3110035E14Rik	#N/A	chr1	9601267..9627142	25876	3.187	6	76982	RIKEN cDNA 3110035E14 gene	GO:0007399 nervous system development | GO:0022008 neurogenesis | GO:0030182 neuron differentiation	GO:0005634 nucleus | GO:0005886 plasma membrane | GO:0016020 membrane	GO:0003674 molecular_function	-	2.83693	0.149623	0.0527411		0.149623	0.0527411	0.0356911	0.263555	4	3	19
Mybl1	protein_coding	chr1	complement(9667407..9700439)	33033	6.291	20	17864	myeloblastosis oncogene-like 1	GO:0000278 mitotic cell cycle | GO:0006355 regulation of transcription, DNA-templated | GO:0007141 male meiosis I | GO:0007283 spermatogenesis | GO:0010529 negative regulation of transposition | GO:0030154 cell differentiation | GO:0045893 positive regulation of transcription, DNA-templated | GO:0045944 positive regulation of transcription by RNA polymerase II | GO:1990511 piRNA biosynthetic proc…	GO:0005634 nucleus | GO:0005654 nucleoplasm	GO:0000978 RNA polymerase II cis-regulatory region sequence-specific DNA binding | GO:0000981 DNA-binding transcription factor activity, RNA polymerase II-specific | GO:0001228 DNA-binding transcription activator activity, RNA polymerase II-specific | GO:0003677 DNA binding	mmu05166 HTLV-I infection	-6.7253	0.138056	0.928467		0.138056	0.928467	0.0723241	0.203787	139	12	29
Vcpip1	protein_coding	chr1	complement(9718622..9748382)	29761	9.749	3	70675	valosin containing protein (p97)/p47 complex interacting protein 1	GO:0000278 mitotic cell cycle | GO:0006508 proteolysis | GO:0007030 Golgi organization | GO:0016320 endoplasmic reticulum membrane fusion | GO:0016567 protein ubiquitination | GO:0035871 protein K11-linked deubiquitination | GO:0071108 protein K48-linked deubiquitination | GO:0090168 Golgi reassembly	GO:0005737 cytoplasm | GO:0005783 endoplasmic reticulum | GO:0005794 Golgi apparatus | GO:0045202 synapse	GO:0004843 thiol-dependent ubiquitin-specific protease activity | GO:0008233 peptidase activity | GO:0008234 cysteine-type peptidase activity | GO:0016787 hydrolase activity | GO:0036459 thiol-dependent ubiquitinyl hydrolase activity	-	-1.57896	5.56891	8.79309	1	5.56891	8.79309	5.54212	5.5957	2040	1425	1234
1700034P13Rik	lncRNA	chr1	9747648..9771256	23609	23.609	0	73331	RIKEN cDNA 1700034P13 gene	GO:0008150 biological_process	GO:0005575 cellular_component	GO:0003674 molecular_function	-	5.87835	0.0523141	0.00889946		0.0523141	0.00889946	0.0578158	0.0468125	5	36	25
LOC105243859	#N/A	chr1	9775563..9791319	15757	15.757	0	105243859	-	-	-	-	-	7.64197	0.0611399	0.00800053		0.0611399	0.00800053	0.0577509	0.0645288	3	24	23
Sgk3	protein_coding	chr1	9798130..9902570	104441	5.622	19	170755	serum/glucocorticoid regulated kinase 3	GO:0006468 protein phosphorylation | GO:0016310 phosphorylation | GO:0018105 peptidyl-serine phosphorylation | GO:0035556 intracellular signal transduction | GO:2001240 negative regulation of extrinsic apoptotic signaling pathway in absence of ligand	GO:0005654 nucleoplasm | GO:0005768 endosome | GO:0031410 cytoplasmic vesicle | GO:0043231 intracellular membrane-bounded organelle	GO:0000166 nucleotide binding | GO:0004672 protein kinase activity | GO:0004674 protein serine/threonine kinase activity | GO:0005524 ATP binding | GO:0015459 potassium channel regulator activity | GO:0016301 kinase activity | GO:0016740 transferase activity | GO:0035091 phosphatidylinositol binding	mmu04068 FoxO signaling pathway | mmu04151 PI3K-Akt signaling pathway	-2.18924	4.34627	9.515	1	4.34627	9.515	3.86443	4.82811	1273	573	614
Gm6195	processed_pseudogene	chr1	complement(9802108..9806974)	4867	4.867	0	620986	-	-	-	-	-	-2.58202	0.153818	0.397162		0.153818	0.397162	0.171389	0.136248	46	22	15
Gm2352	#N/A	chr1	9901944..9902558	615	0.615	0	100039643	predicted gene 2352	-	-	-	-	1	0.001	0.001		0	0	0	0	0	0	0
Mcmdc2	protein_coding	chr1	9906159..9940954	34796	8.027	22	240697	minichromosome maintenance domain containing 2	GO:0006281 DNA repair | GO:0006974 cellular response to DNA damage stimulus | GO:0007130 synaptonemal complex assembly | GO:0007146 meiotic recombination nodule assembly | GO:0007283 spermatogenesis | GO:0042140 late meiotic recombination nodule assembly | GO:0048477 oogenesis | GO:0051321 meiotic cell cycle | GO:1990918 double-strand break repair involved in meiotic recombination	GO:0005634 nucleus | GO:0042555 MCM complex	GO:0003688 DNA replication origin binding | GO:0003697 single-stranded DNA binding	-	1.05218	0.214819	0.204166		0.214819	0.204166	0.0991944	0.330443	39	21	60
Snhg6	lncRNA	chr1	complement(9942025..9944118)	2094	2.094	0	73824	small nucleolar RNA host gene 6	GO:0008150 biological_process	GO:0005575 cellular_component	GO:0003674 molecular_function	-	6.77328	4.75731	0.702365	1	4.75731	0.702365	3.73003	5.7846	35	206	274
Snord87	snoRNA	chr1	complement(9942470..9942543)	74	0.074	0	266793	small nucleolar RNA, C/D box 87	GO:0008150 biological_process	GO:0005730 nucleolus	GO:0030562 rRNA 2'-O-ribose methylation guide activity	-	1	0.001	0.001		0	0	0	0	0	0	0
Tcf24	protein_coding	chr1	complement(9960163..9968436)	8274	4.513	5	100039596	transcription factor 24	GO:0008150 biological_process	GO:0005575 cellular_component	GO:0003674 molecular_function	-	1.20274	0.0223979	0.0186224		0.0223979	0.0186224	0.0252044	0.0195913	2	3	2
Ppp1r42	protein_coding	chr1	complement(9968622..10013541)	44920	6.44	14	69312	protein phosphatase 1, regulatory subunit 42	GO:0010921 regulation of phosphatase activity	GO:0002177 manchette | GO:0005737 cytoplasm | GO:0005813 centrosome | GO:0005815 microtubule organizing center | GO:0005856 cytoskeleton | GO:0015630 microtubule cytoskeleton	GO:0003779 actin binding | GO:0005515 protein binding | GO:0015631 tubulin binding | GO:0070840 dynein complex binding	-	8831.34	0.00883134	0.001		0.00883134	0	0.0176627	0	0	3	0
Cops5	protein_coding	chr1	complement(10024600..10038159)	13560	1.731	9	26754	COP9 (constitutive photomorphogenic) homolog, subunit 5 (Arabidopsis thaliana)	GO:0000338 protein deneddylation | GO:0006355 regulation of transcription, DNA-templated | GO:0006508 proteolysis | GO:0016579 protein deubiquitination | GO:0043066 negative regulation of apoptotic process | GO:0045944 positive regulation of transcription by RNA polymerase II | GO:0046328 regulation of JNK cascade | GO:0051091 positive regulation of DNA-binding transcription factor activity | GO:…	GO:0000785 chromatin | GO:0005634 nucleus | GO:0005654 nucleoplasm | GO:0005667 transcription factor complex | GO:0005737 cytoplasm | GO:0005829 cytosol | GO:0008021 synaptic vesicle | GO:0008180 COP9 signalosome | GO:0030054 cell junction | GO:0031410 cytoplasmic vesicle | GO:0045202 synapse | GO:0048471 perinuclear region of cytoplasm	GO:0003713 transcription coactivator activity | GO:0004222 metalloendopeptidase activity | GO:0004843 thiol-dependent ubiquitin-specific protease activity | GO:0005515 protein binding | GO:0008233 peptidase activity | GO:0008237 metallopeptidase activity | GO:0016787 hydrolase activity | GO:0019784 NEDD8-specific protease activity | GO:0019899 enzyme binding | GO:0035718 macrophage migration inhi…	-	-3.75543	5.46871	20.5374	1	5.46871	20.5374	5.03793	5.89949	846	230	231
Cspp1	protein_coding	chr1	10038218..10136771	98554	8.881	41	211660	centrosome and spindle pole associated protein 1	GO:0032467 positive regulation of cytokinesis | GO:0051781 positive regulation of cell division	GO:0000922 spindle pole | GO:0005737 cytoplasm | GO:0005813 centrosome | GO:0005819 spindle | GO:0005856 cytoskeleton | GO:0005874 microtubule	GO:0005515 protein binding	-	1.80664	0.957413	0.529941		0.957413	0.529941	0.819711	1.09512	112	192	220
Arfgef1	protein_coding	chr1	complement(10137507..10232670)	95164	7.042	38	211673	ADP-ribosylation factor guanine nucleotide-exchange factor 1(brefeldin A-inhibited)	GO:0007030 Golgi organization | GO:0010256 endomembrane system organization | GO:0015031 protein transport | GO:0030837 negative regulation of actin filament polymerization | GO:0031175 neuron projection development | GO:0032012 regulation of ARF protein signal transduction | GO:0034260 negative regulation of GTPase activity | GO:0051897 positive regulation of protein kinase B signaling | GO:0090…	GO:0000139 Golgi membrane | GO:0005634 nucleus | GO:0005654 nucleoplasm | GO:0005730 nucleolus | GO:0005737 cytoplasm | GO:0005794 Golgi apparatus | GO:0005802 trans-Golgi network | GO:0005829 cytosol | GO:0016020 membrane | GO:0030532 small nuclear ribonucleoprotein complex | GO:0048471 perinuclear region of cytoplasm	GO:0005085 guanyl-nucleotide exchange factor activity | GO:0005086 ARF guanyl-nucleotide exchange factor activity | GO:0017022 myosin binding | GO:0034237 protein kinase A regulatory subunit binding	mmu04144 Endocytosis	-1.25964	9.61191	12.1076	1	9.61191	12.1076	8.04945	11.1744	2029	1495	1780
Cpa6	protein_coding	chr1	complement(10295791..10720058)	424268	3.331	17	329093	carboxypeptidase A6	GO:0006508 proteolysis	GO:0005576 extracellular region | GO:0005615 extracellular space	GO:0004180 carboxypeptidase activity | GO:0004181 metallocarboxypeptidase activity | GO:0008233 peptidase activity | GO:0008237 metallopeptidase activity | GO:0008270 zinc ion binding | GO:0016787 hydrolase activity | GO:0046872 metal ion binding	-	-12615.3	0.001	0.0126153		0	0.0126153	0	0	1	0	0
Gm15604	processed_pseudogene	chr1	complement(10554007..10554376)	370	0.37	0	100416202	predicted gene 15604	-	-	-	-	1	0.001	0.001		0	0	0	0	0	0	0
Gm15603	processed_pseudogene	chr1	10694415..10695614	1200	1.2	0	102636010	-	-	-	-	-	1	0.001	0.001		0	0	0	0	0	0	0
Gm5522	processed_pseudogene	chr1	10805281..10806522	1242	1.242	0	433271	predicted gene 5522	-	-	-	-	1	0.001	0.001		0	0	0	0	0	0	0
Prex2	protein_coding	chr1	10993273..11303683	310411	11.573	45	109294	phosphatidylinositol-3,4,5-trisphosphate-dependent Rac exchange factor 2	GO:0007186 G protein-coupled receptor signaling pathway | GO:0008344 adult locomotory behavior | GO:0014065 phosphatidylinositol 3-kinase signaling | GO:0035023 regulation of Rho protein signal transduction | GO:0035556 intracellular signal transduction | GO:0048813 dendrite morphogenesis	GO:0005886 plasma membrane	GO:0005085 guanyl-nucleotide exchange factor activity | GO:0005089 Rho guanyl-nucleotide exchange factor activity | GO:0005096 GTPase activator activity | GO:0030676 Rac guanyl-nucleotide exchange factor activity	-	8.49306	0.0308382	0.00363099		0.0308382	0.00363099	0.0196574	0.042019	1	6	11
A830018L16Rik	protein_coding	chr1	11414105..11975902	561798	8.722	24	320492	RIKEN cDNA A830018L16 gene	GO:0008150 biological_process	GO:0005575 cellular_component	GO:0003674 molecular_function	-	27525.7	0.0275257	0.001		0.0275257	0	0.0347772	0.0202742	0	8	4
Gm30898	#N/A	chr1	11979540..11991123	11584	11.584	0	102632954	-	-	-	-	-	5452.85	0.00545285	0.001		0.00545285	0	0.00327313	0.00763257	0	1	2
Gm30974	#N/A	chr1	complement(12029084..12061033)	31950	31.95	0	102633057	-	-	-	-	-	4.0579	0.0213482	0.0052609		0.0213482	0.0052609	0.00118673	0.0415097	4	1	30
Gm7560	processed_pseudogene	chr1	12120939..12122032	1094	1.094	0	665262	predicted gene 7560	-	-	-	-	1	0.001	0.001		0	0	0	0	0	0	0
LOC105243860	#N/A	chr1	complement(12423687..12432474)	8788	8.788	0	105243860	-	-	-	-	-	7545.72	0.00754572	0.001		0.00754572	0	0	0.0150914	0	0	3
Mir6341	miRNA	chr1	12425986..12426106	121	0.121	0	102465961	microRNA 6341	-	-	-	-	1	0.001	0.001		0	0	0	0	0	0	0
Gm2383	processed_pseudogene	chr1	12565560..12566590	1031	1.031	0	100039709	predicted gene 2383	-	-	-	-	64317.9	0.0643179	0.001		0.0643179	0	0	0.128636	0	0	3
Gm6216	processed_pseudogene	chr1	12655843..12656744	902	0.902	0	621353	predicted gene 6216	-	-	-	-	1	0.001	0.001		0	0	0	0	0	0	0
Gm17644	lncRNA	chr1	12667563..12673090	5528	5.528	0	329096	predicted gene, 17644	-	-	-	-	-5.17198	0.0514416	0.266055		0.0514416	0.266055	0.102883	0	35	15	0
Sulf1	protein_coding	chr1	12691695..12861192	169498	7.21	27	240725	sulfatase 1	GO:0001822 kidney development | GO:0001937 negative regulation of endothelial cell proliferation | GO:0002063 chondrocyte development | GO:0003094 glomerular filtration | GO:0006790 sulfur compound metabolic process | GO:0006915 apoptotic process | GO:0010575 positive regulation of vascular endothelial growth factor production | GO:0014846 esophagus smooth muscle contraction | GO:0016525 negative…	GO:0005615 extracellular space | GO:0005783 endoplasmic reticulum | GO:0005794 Golgi apparatus | GO:0005886 plasma membrane | GO:0009986 cell surface | GO:0045121 membrane raft	GO:0003824 catalytic activity | GO:0004065 arylsulfatase activity | GO:0005509 calcium ion binding | GO:0005539 glycosaminoglycan binding | GO:0008449 N-acetylglucosamine-6-sulfatase activity | GO:0008484 sulfuric ester hydrolase activity | GO:0016787 hydrolase activity | GO:0046872 metal ion binding	-	-15.4803	0.0214601	0.332209		0.0214601	0.332209	0	0.0429202	57	0	7
Slco5a1	protein_coding	chr1	complement(12866549..12992932)	126384	10.243	16	240726	solute carrier organic anion transporter family, member 5A1	GO:0043252 sodium-independent organic anion transport	GO:0005886 plasma membrane | GO:0005887 integral component of plasma membrane | GO:0043231 intracellular membrane-bounded organelle	GO:0015347 sodium-independent organic anion transmembrane transporter activity	-	-1.33045	0.55195	0.73434		0.55195	0.73434	0.421987	0.681913	179	114	158
Gm5250	processed_pseudogene	chr1	13061922..13062537	616	0.616	0	383490	predicted gene 5250	-	-	-	-	1	0.001	0.001		0	0	0	0	0	0	0
LOC105243861	#N/A	chr1	complement(13090688..13104959)	14272	14.272	0	105243861	-	-	-	-	-	-3.65236	0.0338581	0.123662		0.0338581	0.123662	0.0212533	0.0464628	42	8	15
Prdm14	protein_coding	chr1	complement(13113428..13127163)	13736	2.593	8	383491	PR domain containing 14	GO:0000122 negative regulation of transcription by RNA polymerase II | GO:0000902 cell morphogenesis | GO:0001708 cell fate specification | GO:0001827 inner cell mass cell fate commitment | GO:0007281 germ cell development | GO:0007566 embryo implantation | GO:0009566 fertilization | GO:0010468 regulation of gene expression | GO:0019827 stem cell population maintenance | GO:0030718 germ-line stem…	GO:0005634 nucleus | GO:0005654 nucleoplasm	GO:0000977 RNA polymerase II regulatory region sequence-specific DNA binding | GO:0003676 nucleic acid binding | GO:0003677 DNA binding | GO:0003700 DNA-binding transcription factor activity | GO:0003723 RNA binding | GO:0005515 protein binding | GO:0008168 methyltransferase activity | GO:0016740 transferase activity | GO:0031490 chromatin DNA binding | GO:0043565 sequence-specific DNA binding | …	-	1	0.001	0.001		0	0	0	0	0	0	0
Ncoa2	protein_coding	chr1	complement(13139105..13374691)	235587	9.841	35	17978	nuclear receptor coactivator 2	GO:0000122 negative regulation of transcription by RNA polymerase II | GO:0006355 regulation of transcription, DNA-templated | GO:0007623 circadian rhythm | GO:0010468 regulation of gene expression | GO:0010906 regulation of glucose metabolic process | GO:0032570 response to progesterone | GO:0032870 cellular response to hormone stimulus | GO:0032922 circadian regulation of gene expression | GO:0…	GO:0005634 nucleus | GO:0005654 nucleoplasm | GO:0005737 cytoplasm | GO:0005791 rough endoplasmic reticulum | GO:0005794 Golgi apparatus | GO:0005874 microtubule | GO:0014069 postsynaptic density | GO:0016604 nuclear body | GO:0030425 dendrite | GO:0032991 protein-containing complex | GO:0043025 neuronal cell body | GO:0043197 dendritic spine | GO:0048786 presynaptic active zone	GO:0000978 RNA polymerase II cis-regulatory region sequence-specific DNA binding | GO:0001162 RNA polymerase II intronic transcription regulatory region sequence-specific DNA binding | GO:0003682 chromatin binding | GO:0003713 transcription coactivator activity | GO:0005102 signaling receptor binding | GO:0005515 protein binding | GO:0008134 transcription factor binding | GO:0016922 nuclear recep…	mmu04919 Thyroid hormone signaling pathway	-2.12741	3.30578	7.03276	1	3.30578	7.03276	3.60627	3.00529	1647	936	669
LOC105243863	#N/A	chr1	13316270..13319028	2759	2.723	2	105243863	-	-	-	-	-	100906	0.100906	0.001		0.100906	0	0.0556972	0.146115	0	4	9
LOC105243862	#N/A	chr1	13357666..13361838	4173	4.173	0	105243862	-	-	-	-	-	4.0088	0.242208	0.0604191		0.242208	0.0604191	0.208978	0.275438	6	23	26
LOC105243864	#N/A	chr1	complement(13392554..13422385)	29832	29.832	0	105243864	-	-	-	-	-	2.21384	0.0343027	0.0154946		0.0343027	0.0154946	0.0241486	0.0444568	11	19	30
Gm7593	processed_pseudogene	chr1	complement(13407010..13407654)	645	0.645	0	665341	predicted gene 7593	-	-	-	-	1	0.001	0.001		0	0	0	0	0	0	0
LOC105243872	#N/A	chr1	13436514..13436800	287	0.287	0	105243872	-	-	-	-	-	1	0.001	0.001		0	0	0	0	0	0	0
Tram1	protein_coding	chr1	complement(13564693..13589910)	25218	2.943	11	72265	translocating chain-associating membrane protein 1	GO:0006616 SRP-dependent cotranslational protein targeting to membrane, translocation | GO:0015031 protein transport	GO:0005783 endoplasmic reticulum | GO:0005791 rough endoplasmic reticulum | GO:0016020 membrane | GO:0016021 integral component of membrane | GO:0030176 integral component of endoplasmic reticulum membrane	GO:0003674 molecular_function	mmu04141 Protein processing in endoplasmic reticulum	-2.20316	16.9541	37.3524	1	16.9541	37.3524	18.346	15.5621	2616	1424	1036
Lactb2	protein_coding	chr1	complement(13625893..13660605)	34713	1.99	9	212442	lactamase, beta 2	GO:0090502 RNA phosphodiester bond hydrolysis, endonucleolytic	GO:0005739 mitochondrion | GO:0005759 mitochondrial matrix	GO:0003723 RNA binding | GO:0003727 single-stranded RNA binding | GO:0004518 nuclease activity | GO:0004519 endonuclease activity | GO:0004521 endoribonuclease activity | GO:0008270 zinc ion binding | GO:0016787 hydrolase activity | GO:0046872 metal ion binding	-	1.97142	3.33032	1.68931	1	3.33032	1.68931	4.03928	2.62137	80	212	118
Xkr9	protein_coding	chr1	13668738..13701723	32986	2.15	7	381246	X Kell blood group precursor related family member 9 homolog	GO:0043652 engulfment of apoptotic cell | GO:0070782 phosphatidylserine exposure on apoptotic cell surface | GO:1902742 apoptotic process involved in development	GO:0005886 plasma membrane | GO:0016020 membrane | GO:0016021 integral component of membrane	GO:0003674 molecular_function	-	20561.8	0.0205618	0.001		0.0205618	0	0	0.0411236	0	0	2
Gm2452	#N/A	chr1	complement(13774628..13775938)	1311	1.311	0	100039843	predicted gene 2452	-	-	-	-	1	0.001	0.001		0	0	0	0	0	0	0
Gm5523	processed_pseudogene	chr1	complement(13785685..13786929)	1245	1.245	0	433273	predicted pseudogene 5523	-	-	-	-	-1.02337	0.0329814	0.0337522		0.0329814	0.0337522	0.0304545	0.0355083	1	1	1
Gm31195	#N/A	chr1	13846500..13881933	35434	35.434	0	102633349	-	-	-	-	-	6.11319	0.021749	0.00355772		0.021749	0.00355772	0.0160506	0.0274474	3	15	22
Gm19122	#N/A	chr1	13916903..13917754	852	0.852	0	100418294	predicted gene, 19122	-	-	-	-	1	0.001	0.001		0	0	0	0	0	0	0
LOC105243865	#N/A	chr1	14042253..14141388	99136	99.136	0	105243865	-	-	-	-	-	-1.64189	0.0273654	0.044931		0.0273654	0.044931	0.0141511	0.0405797	106	37	91
Eya1	protein_coding	chr1	complement(14168953..14310265)	141313	5.622	33	14048	eyes absent 1 homolog (Drosophila)	GO:0000132 establishment of mitotic spindle orientation | GO:0001656 metanephros development | GO:0001657 ureteric bud development | GO:0001658 branching involved in ureteric bud morphogenesis | GO:0003151 outflow tract morphogenesis | GO:0006281 DNA repair | GO:0006302 double-strand break repair | GO:0006325 chromatin organization | GO:0006470 protein dephosphorylation | GO:0006974 cellular resp…	GO:0005634 nucleus | GO:0005654 nucleoplasm | GO:0005737 cytoplasm | GO:0016604 nuclear body | GO:0032991 protein-containing complex | GO:0032993 protein-DNA complex	GO:0003723 RNA binding | GO:0004721 phosphoprotein phosphatase activity | GO:0004725 protein tyrosine phosphatase activity | GO:0005515 protein binding | GO:0016787 hydrolase activity | GO:0046872 metal ion binding	mmu05202 Transcriptional misregulation in cancer	77543.7	0.0775437	0.001		0.0775437	0	0.107907	0.0471802	0	16	6
Gm7617	#N/A	chr1	14550433..14551087	655	0.655	0	665391	predicted gene 7617	-	-	-	-	1	0.001	0.001		0	0	0	0	0	0	0
Msc	protein_coding	chr1	complement(14753344..14756012)	2669	1.913	7	17681	musculin	GO:0000122 negative regulation of transcription by RNA polymerase II | GO:0014707 branchiomeric skeletal muscle development | GO:0060021 roof of mouth development | GO:0060539 diaphragm development | GO:1990830 cellular response to leukemia inhibitory factor	GO:0005634 nucleus | GO:0005654 nucleoplasm	GO:0000978 RNA polymerase II cis-regulatory region sequence-specific DNA binding | GO:0001227 DNA-binding transcription repressor activity, RNA polymerase II-specific | GO:0003677 DNA binding | GO:0046983 protein dimerization activity	-	33019.2	0.0330192	0.001		0.0330192	0	0.0198201	0.0462183	0	1	2
LOC105243866	#N/A	chr1	14756151..14793292	37142	37.142	0	105243866	-	-	-	-	-	7.7789	0.0176017	0.00226275		0.0176017	0.00226275	0.0102084	0.024995	2	10	21
Smt3h2-ps4	processed_pseudogene	chr1	complement(14839267..14840273)	1007	1.007	0	114607	SMT3 suppressor of mif two 3 homolog 2, pseudogene 4 (S. cerevisiae)	-	-	-	-	-41729.4	0.001	0.0417294		0	0.0417294	0	0	1	0	0
Rpl5-ps1	processed_pseudogene	chr1	14865018..14866019	1002	1.002	0	665407	ribosomal protein L5, pseudogene 1	-	-	-	-	-4.43312	0.0189201	0.0838752		0.0189201	0.0838752	0.0378402	0	2	1	0
Gm33500	#N/A	chr1	14869758..14870038	281	0.281	0	102636435	-	-	-	-	-	1	0.001	0.001		0	0	0	0	0	0	0
Trpa1	protein_coding	chr1	complement(14872648..14919014)	46367	4.415	29	277328	transient receptor potential cation channel, subfamily A, member 1	GO:0006811 ion transport | GO:0006816 calcium ion transport | GO:0007166 cell surface receptor signaling pathway | GO:0009409 response to cold | GO:0010033 response to organic substance | GO:0014070 response to organic cyclic compound | GO:0014832 urinary bladder smooth muscle contraction | GO:0019233 sensory perception of pain | GO:0034605 cellular response to heat | GO:0035774 positive regulati…	GO:0005886 plasma membrane | GO:0005887 integral component of plasma membrane | GO:0016020 membrane | GO:0016021 integral component of membrane | GO:0016324 apical plasma membrane | GO:0030424 axon | GO:0032421 stereocilium bundle	GO:0005216 ion channel activity | GO:0005245 voltage-gated calcium channel activity | GO:0005262 calcium channel activity | GO:0005515 protein binding | GO:0015267 channel activity | GO:0015278 calcium-release channel activity | GO:0042802 identical protein binding | GO:0097604 temperature-gated cation channel activity | GO:1990760 osmolarity-sensing cation channel activity	mmu04750 Inflammatory mediator regulation of TRP channels	1	0.001	0.001		0	0	0	0	0	0	0
Gm5048	#N/A	chr1	15067033..15067558	526	0.526	0	269105	-	-	-	-	-	-1.10828	0.0720834	0.0798887		0.0720834	0.0798887	0.144167	0	1	2	0
Gm19917	#N/A	chr1	15201959..15205406	3448	3.448	0	100503835	-	-	-	-	-	-12187.2	0.001	0.0121872		0	0.0121872	0	0	1	0	0
Gm10566	processed_pseudogene	chr1	complement(15268604..15269815)	1212	1.212	0	100039959	predicted gene 10566	-	-	-	-	-1.5962	0.130326	0.208027		0.130326	0.208027	0.187702	0.0729502	6	6	2
Kcnb2	protein_coding	chr1	15287383..15714214	426832	6.01	7	98741	potassium voltage gated channel, Shab-related subfamily, member 2	GO:0006811 ion transport | GO:0006813 potassium ion transport | GO:0034765 regulation of ion transmembrane transport | GO:0051260 protein homooligomerization | GO:0055085 transmembrane transport | GO:0071805 potassium ion transmembrane transport | GO:0072659 protein localization to plasma membrane	GO:0005886 plasma membrane | GO:0008076 voltage-gated potassium channel complex | GO:0016020 membrane | GO:0016021 integral component of membrane | GO:0030425 dendrite | GO:0032809 neuronal cell body membrane | GO:0042995 cell projection | GO:0043025 neuronal cell body	GO:0005216 ion channel activity | GO:0005244 voltage-gated ion channel activity | GO:0005249 voltage-gated potassium channel activity | GO:0005251 delayed rectifier potassium channel activity | GO:0005267 potassium channel activity | GO:0044325 ion channel binding | GO:0046982 protein heterodimerization activity	-	22080.8	0.0220808	0.001		0.0220808	0	0.0441616	0	0	7	0
Gm6060	processed_pseudogene	chr1	complement(15759930..15760680)	751	0.751	0	606528	predicted gene 6060	-	-	-	-	1	0.001	0.001		0	0	0	0	0	0	0
Gm31461	#N/A	chr1	15794766..15797087	2322	2.322	0	102633700	-	-	-	-	-	1	0.001	0.001		0	0	0	0	0	0	0
Terf1	protein_coding	chr1	15804982..15844052	39071	3.276	14	21749	telomeric repeat binding factor 1	GO:0000237 leptotene | GO:0000723 telomere maintenance | GO:0007004 telomere maintenance via telomerase | GO:0007049 cell cycle | GO:0008156 negative regulation of DNA replication | GO:0031116 positive regulation of microtubule polymerization | GO:0031627 telomeric loop formation | GO:0032211 negative regulation of telomere maintenance via telomerase | GO:0043065 positive regulation of apoptotic …	GO:0000781 chromosome, telomeric region | GO:0000783 nuclear telomere cap complex | GO:0000784 nuclear chromosome, telomeric region | GO:0001650 fibrillar center | GO:0005634 nucleus | GO:0005694 chromosome | GO:0005730 nucleolus | GO:0005737 cytoplasm | GO:0005819 spindle | GO:0005856 cytoskeleton | GO:0016604 nuclear body | GO:0070187 shelterin complex	GO:0003677 DNA binding | GO:0003691 double-stranded telomeric DNA binding | GO:0003720 telomerase activity | GO:0005515 protein binding | GO:0008017 microtubule binding | GO:0008022 protein C-terminus binding | GO:0008301 DNA binding, bending | GO:0042162 telomeric DNA binding | GO:0042802 identical protein binding | GO:0042803 protein homodimerization activity | GO:0071532 ankyrin repeat binding…	-	1.32848	1.20987	0.910722	1	1.20987	0.910722	0.624987	1.79476	71	54	133
Sbspon	protein_coding	chr1	complement(15853862..15892722)	38861	2.748	5	226866	somatomedin B and thrombospondin, type 1 domain containing	GO:0006955 immune response | GO:0008150 biological_process	GO:0005576 extracellular region	GO:0003674 molecular_function | GO:0005044 scavenger receptor activity | GO:0030247 polysaccharide binding	-	8043.64	0.00804364	0.001		0.00804364	0	0	0.0160873	0	0	1
Gm31523	#N/A	chr1	15897383..15907764	10382	10.382	0	102633776	-	-	-	-	-	11562.3	0.0115623	0.001		0.0115623	0	0.0146083	0.00851625	0	4	2
Gm7634	processed_pseudogene	chr1	16053334..16054043	710	0.71	0	665434	-	-	-	-	-	1	0.001	0.001		0	0	0	0	0	0	0
4930444P10Rik	protein_coding	chr1	complement(16065974..16093325)	27352	1.849	10	75799	RIKEN cDNA 4930444P10 gene	GO:0008150 biological_process	GO:0005575 cellular_component	GO:0003674 molecular_function	-	2.63007	0.0597726	0.0227266		0.0597726	0.0227266	0	0.119545	1	0	5
Rpl7	protein_coding	chr1	complement(16101295..16104433)	3139	0.934	7	19989	ribosomal protein L7	GO:0000463 maturation of LSU-rRNA from tricistronic rRNA transcript (SSU-rRNA, 5.8S rRNA, LSU-rRNA) | GO:0006364 rRNA processing | GO:0006412 translation | GO:0042273 ribosomal large subunit biogenesis	GO:0005840 ribosome | GO:0005844 polysome | GO:0014069 postsynaptic density | GO:0022625 cytosolic large ribosomal subunit | GO:0031672 A band | GO:0045202 synapse | GO:1990904 ribonucleoprotein complex	GO:0003677 DNA binding | GO:0003723 RNA binding | GO:0003729 mRNA binding | GO:0003735 structural constituent of ribosome | GO:0008097 5S rRNA binding | GO:0042802 identical protein binding	mmu03010 Ribosome	-2.92049	58.1548	169.841	1	58.1548	169.841	68.9306	47.3791	3775	1698	1001
Rdh10	protein_coding	chr1	16105780..16133734	27955	2.295	6	98711	retinol dehydrogenase 10 (all-trans)	GO:0001656 metanephros development | GO:0001701 in utero embryonic development | GO:0002138 retinoic acid biosynthetic process | GO:0007601 visual perception | GO:0008406 gonad development | GO:0009887 animal organ morphogenesis | GO:0014032 neural crest cell development | GO:0031076 embryonic camera-type eye development | GO:0035115 embryonic forelimb morphogenesis | GO:0042572 retinol metabolic…	GO:0005737 cytoplasm | GO:0005783 endoplasmic reticulum | GO:0005811 lipid droplet | GO:0016020 membrane | GO:0016021 integral component of membrane | GO:0043231 intracellular membrane-bounded organelle	GO:0004745 retinol dehydrogenase activity | GO:0016491 oxidoreductase activity | GO:0016616 oxidoreductase activity, acting on the CH-OH group of donors, NAD or NADP as acceptor | GO:0052650 NADP-retinol dehydrogenase activity	mmu00830 Retinol metabolism | mmu01100 Metabolic pathways	26.8346	0.491341	0.01831		0.491341	0.01831	0.46259	0.520092	1	28	27
Stau2	protein_coding	chr1	complement(16228803..16520181)	291379	5.733	23	29819	staufen (RNA binding protein) homolog 2 (Drosophila)	GO:0010468 regulation of gene expression | GO:0032956 regulation of actin cytoskeleton organization | GO:0048592 eye morphogenesis | GO:0051489 regulation of filopodium assembly | GO:0051965 positive regulation of synapse assembly | GO:0061003 positive regulation of dendritic spine morphogenesis | GO:0098964 anterograde dendritic transport of messenger ribonucleoprotein complex | GO:1900454 posit…	GO:0005634 nucleus | GO:0005737 cytoplasm | GO:0005783 endoplasmic reticulum | GO:0005874 microtubule | GO:0010494 cytoplasmic stress granule | GO:0030424 axon | GO:0030425 dendrite | GO:0031965 nuclear membrane | GO:0043025 neuronal cell body | GO:0043198 dendritic shaft | GO:1990124 messenger ribonucleoprotein complex	GO:0003723 RNA binding | GO:0003725 double-stranded RNA binding | GO:0019894 kinesin binding | GO:0030544 Hsp70 protein binding | GO:0043022 ribosome binding | GO:0051019 mitogen-activated protein kinase binding	-	-16.1084	0.0418624	0.674337		0.0418624	0.674337	0.00661362	0.0771112	92	1	10
LOC102634042	#N/A	chr1	16253587..16273299	19713	19.713	0	102634042	-	-	-	-	-	-3.23896	0.0184277	0.0596866		0.0184277	0.0596866	0.0211573	0.015698	28	11	7
Ube2w	protein_coding	chr1	complement(16540788..16619420)	78633	4.767	12	66799	ubiquitin-conjugating enzyme E2W (putative)	GO:0000209 protein polyubiquitination | GO:0006281 DNA repair | GO:0006513 protein monoubiquitination | GO:0006515 protein quality control for misfolded or incompletely synthesized proteins | GO:0006974 cellular response to DNA damage stimulus | GO:0043161 proteasome-mediated ubiquitin-dependent protein catabolic process | GO:0070979 protein K11-linked ubiquitination | GO:0071218 cellular respons…	GO:0005634 nucleus	GO:0000166 nucleotide binding | GO:0004842 ubiquitin-protein transferase activity | GO:0005515 protein binding | GO:0005524 ATP binding | GO:0016740 transferase activity | GO:0031625 ubiquitin protein ligase binding | GO:0061631 ubiquitin conjugating enzyme activity	mmu04120 Ubiquitin mediated proteolysis	-2.40451	1.86603	4.48687	1	1.86603	4.48687	2.21116	1.52089	509	278	164
Gm31780	#N/A	chr1	16591021..16596309	5289	5.205	2	102634119	-	-	-	-	-	-1.8875	0.444833	0.839622		0.444833	0.839622	0.473493	0.416174	104	65	49
Tceb1	#N/A	chr1	complement(16641725..16657097)	15373	2.457	15	67923	transcription elongation factor B (SIII), polypeptide 1	GO:0006511 ubiquitin-dependent protein catabolic process | GO:0032968 positive regulation of transcription elongation from RNA polymerase II promoter	GO:0005634 nucleus | GO:0030891 VCB complex | GO:0070449 elongin complex	GO:0004842 ubiquitin-protein transferase activity | GO:0005515 protein binding | GO:0044877 protein-containing complex binding	mmu04066 HIF-1 signaling pathway | mmu04120 Ubiquitin mediated proteolysis | mmu05200 Pathways in cancer | mmu05211 Renal cell carcinoma	1.23287	3.87972	3.14691	1	3.87972	3.14691	3.33327	4.42618	184	216	246
D030040B21Rik	lncRNA	chr1	16657552..16662278	4727	4.727	0	329101	RIKEN cDNA D030040B21 gene	-	-	-	-	9352.2	0.0093522	0.001		0.0093522	0	0	0.0187044	0	0	2
Gm7654	processed_pseudogene	chr1	complement(16662385..16663714)	1330	1.33	0	665480	predicted gene 7654	-	-	-	-	1	0.001	0.001		0	0	0	0	0	0	0
Tmem70	protein_coding	chr1	16665191..16678275	13085	2.081	6	70397	transmembrane protein 70	GO:0033615 mitochondrial proton-transporting ATP synthase complex assembly	GO:0005654 nucleoplasm | GO:0005739 mitochondrion | GO:0005743 mitochondrial inner membrane | GO:0016020 membrane | GO:0016021 integral component of membrane | GO:0032592 integral component of mitochondrial membrane	GO:0003674 molecular_function	-	1.28148	1.60436	1.25196	1	1.60436	1.25196	1.53048	1.67824	62	84	79
Gm31863	#N/A	chr1	complement(16682052..16689265)	7214	7.214	0	102634230	-	-	-	-	-	-2.31787	0.251307	0.582499		0.251307	0.582499	0.183956	0.318659	100	35	52
Ly96	protein_coding	chr1	16687851..16709608	21758	1.044	9	17087	lymphocyte antigen 96	GO:0002376 immune system process | GO:0006954 inflammatory response | GO:0031663 lipopolysaccharide-mediated signaling pathway | GO:0031666 positive regulation of lipopolysaccharide-mediated signaling pathway | GO:0032496 response to lipopolysaccharide | GO:0032497 detection of lipopolysaccharide | GO:0032760 positive regulation of tumor necrosis factor production | GO:0034142 toll-like receptor …	GO:0005576 extracellular region | GO:0031226 intrinsic component of plasma membrane | GO:0046696 lipopolysaccharide receptor complex	GO:0001530 lipopolysaccharide binding | GO:0001875 lipopolysaccharide immune receptor activity | GO:0005515 protein binding | GO:0035662 Toll-like receptor 4 binding	mmu04064 NF-kappa B signaling pathway | mmu04620 Toll-like receptor signaling pathway | mmu05133 Pertussis | mmu05145 Toxoplasmosis	1.30272	3.35584	2.57603	1	3.35584	2.57603	4.97555	1.73613	64	137	41
Gm5828	processed_pseudogene	chr1	complement(16768279..16770138)	1860	1.86	0	545306	predicted gene 5828	-	-	-	-	-3.87898	0.0407698	0.158145		0.0407698	0.158145	0.0815396	0	7	4	0
Jph1	protein_coding	chr1	complement(16942853..17097932)	155080	5.206	12	57339	junctophilin 1	GO:0007517 muscle organ development	GO:0005654 nucleoplasm | GO:0005783 endoplasmic reticulum | GO:0005789 endoplasmic reticulum membrane | GO:0005886 plasma membrane | GO:0014701 junctional sarcoplasmic reticulum membrane | GO:0016020 membrane | GO:0016021 integral component of membrane | GO:0016529 sarcoplasmic reticulum | GO:0030018 Z disc | GO:0030314 junctional membrane complex	GO:0008307 structural constituent of muscle	-	4245.85	0.00424585	0.001		0.00424585	0	0	0.00849171	0	0	1
Gm31982	#N/A	chr1	complement(17098573..17124575)	26003	26.003	0	102634387	-	-	-	-	-	-1.27953	0.0126298	0.0161602		0.0126298	0.0161602	0.00145814	0.0238015	10	1	14
Gm28783	lncRNA	chr1	17120597..17128971	8375	8.375	0	102634310	-	-	-	-	-	-2.21656	0.00226364	0.00501749		0.00226364	0.00501749	0.00452727	0	1	1	0
Gdap1	protein_coding	chr1	17145373..17164271	18899	3.938	6	14545	ganglioside-induced differentiation-associated-protein 1	GO:0000266 mitochondrial fission | GO:0006626 protein targeting to mitochondrion | GO:0007005 mitochondrion organization | GO:0008053 mitochondrial fusion | GO:0032526 response to retinoic acid	GO:0005737 cytoplasm | GO:0005739 mitochondrion | GO:0005741 mitochondrial outer membrane | GO:0005829 cytosol | GO:0016020 membrane | GO:0016021 integral component of membrane | GO:0031307 integral component of mitochondrial outer membrane	-	-	-69.5892	0.0104271	0.725612		0.0104271	0.725612	0.00962821	0.011226	68	1	1
Gm28784	lncRNA	chr1	17168402..17173109	4708	4.708	0	102634541	-	-	-	-	-	-9.50544	0.00469497	0.0446277		0.00469497	0.0446277	0	0.00938994	5	0	1
LOC105243867	#N/A	chr1	17202970..17205577	2608	2.608	0	105243867	-	-	-	-	-	1	0.001	0.001		0	0	0	0	0	0	0
Gm5251	processed_pseudogene	chr1	17394459..17395547	1089	1.089	0	383495	-	-	-	-	-	1	0.001	0.001		0	0	0	0	0	0	0
Rbm6-ps1	processed_pseudogene	chr1	complement(17397290..17401340)	4051	4.051	0	108212	RNA binding motif protein 6, pseudogene 1	-	-	-	-	1	0.001	0.001		0	0	0	0	0	0	0
Gm6075	processed_pseudogene	chr1	complement(17428841..17429569)	729	0.729	0	606716	predicted gene 6075	-	-	-	-	1	0.001	0.001		0	0	0	0	0	0	0
Pi15	protein_coding	chr1	17601901..17630939	29039	6.923	6	94227	peptidase inhibitor 15	GO:0007275 multicellular organism development | GO:0010466 negative regulation of peptidase activity	GO:0005576 extracellular region | GO:0005615 extracellular space	GO:0030414 peptidase inhibitor activity	-	3.47573	0.0843885	0.0242793		0.0843885	0.0242793	0.0219072	0.14687	4	4	23
Gm28154	lncRNA	chr1	complement(17615083..17641096)	26014	26.014	0	102634738	-	-	-	-	-	2.5099	0.0202717	0.0080767		0.0202717	0.0080767	0.00145752	0.0390859	5	1	23
Gm16070	lncRNA	chr1	complement(17676027..17727646)	51620	51.62	0	102634913	predicted gene 16070	GO:0008150 biological_process	GO:0005575 cellular_component	GO:0003674 molecular_function	-	-1.9931	0.0339002	0.0675665		0.0339002	0.0675665	0.0352569	0.0325435	83	48	38
Crispld1	protein_coding	chr1	17727030..17766352	39323	4.602	23	83691	cysteine-rich secretory protein LCCL domain containing 1	GO:0060325 face morphogenesis	GO:0005576 extracellular region | GO:0005615 extracellular space	GO:0003674 molecular_function	-	-155229	0.001	0.155229		0	0.155229	0	0	17	0	0
LOC105243868	#N/A	chr1	complement(17750876..17944776)	193901	193.901	0	105243868	-	-	-	-	-	2.40492	0.0145932	0.00606805		0.0145932	0.00606805	0.00547519	0.0237111	28	28	104
Gm7690	processed_pseudogene	chr1	17947002..17949647	2646	2.646	0	665564	predicted gene 7690	-	-	-	-	41768.5	0.0417685	0.001		0.0417685	0	0	0.0835371	0	0	5
Gm18775	transcribed_unprocessed_pseudogene	chr1	complement(17992961..17999624)	6664	6.664	0	100417711	predicted gene, 18775	-	-	-	-	3316.91	0.00331691	0.001		0.00331691	0	0	0.00663383	0	0	1
Gm17969	processed_pseudogene	chr1	17993825..17997483	3659	3.659	0	100416210	predicted gene, 17969	-	-	-	-	1	0.001	0.001		0	0	0	0	0	0	0
Crisp4	protein_coding	chr1	complement(18114905..18145967)	31063	1.781	15	78081	cysteine-rich secretory protein 4	GO:0007339 binding of sperm to zona pellucida | GO:0060046 regulation of acrosome reaction	GO:0005615 extracellular space	GO:0005246 calcium channel regulator activity	-	11.5723	0.273041	0.0235943		0.273041	0.0235943	0	0.546082	1	0	22
Defb44-ps	unprocessed_pseudogene	chr1	complement(18210053..18223564)	13512	13.512	0	654454	defensin beta 44, pseudogene	-	-	-	-	-2.91999	0.0191709	0.0559789		0.0191709	0.0559789	0.0252548	0.013087	18	9	4
Defb18	protein_coding	chr1	complement(18236473..18237443)	971	0.258	2	654460	defensin beta 18	GO:0006952 defense response | GO:0008150 biological_process | GO:0042742 defense response to bacterium | GO:0045087 innate immune response	GO:0005575 cellular_component | GO:0005576 extracellular region	GO:0003674 molecular_function	-	1	0.001	0.001		0	0	0	0	0	0	0
Defb41	protein_coding	chr1	complement(18250978..18265138)	14161	0.469	2	77673	defensin beta 41	GO:0006952 defense response | GO:0042742 defense response to bacterium | GO:0045087 innate immune response	GO:0005576 extracellular region	GO:0003674 molecular_function	-	1	0.001	0.001		0	0	0	0	0	0	0
Gm15386	#N/A	chr1	complement(18260524..18265138)	4615	0.256	2	654464	predicted gene 15386	-	-	-	-	1	0.001	0.001		0	0	0	0	0	0	0
Gm17837	processed_pseudogene	chr1	complement(18262395..18263379)	985	0.985	0	100415956	predicted gene, 17837	-	-	-	-	1	0.001	0.001		0	0	0	0	0	0	0
LOC105243869	#N/A	chr1	18570655..18599645	28991	28.991	0	105243869	-	-	-	-	-	-1.12423	0.00773575	0.0086968		0.00773575	0.0086968	0.0078471	0.00762441	6	6	5
Gm5252	processed_pseudogene	chr1	18708428..18709338	911	0.911	0	383499	predicted gene 5252	-	-	-	-	1	0.001	0.001		0	0	0	0	0	0	0
Gm15825	lncRNA	chr1	complement(19063274..19075465)	12192	12.192	0	102635013	-	-	-	-	-	1.05203	0.00725194	0.00689329		0.00725194	0.00689329	0	0.0145039	2	0	4
Tfap2d	protein_coding	chr1	19103022..19168592	65571	4.968	12	226896	transcription factor AP-2, delta	GO:0006355 regulation of transcription, DNA-templated | GO:0006357 regulation of transcription by RNA polymerase II | GO:0042127 regulation of cell population proliferation | GO:0043524 negative regulation of neuron apoptotic process | GO:0045893 positive regulation of transcription, DNA-templated | GO:0045944 positive regulation of transcription by RNA polymerase II | GO:0048856 anatomical struc…	GO:0005634 nucleus | GO:0005667 transcription factor complex	GO:0000977 RNA polymerase II regulatory region sequence-specific DNA binding | GO:0000981 DNA-binding transcription factor activity, RNA polymerase II-specific | GO:0003677 DNA binding | GO:0003700 DNA-binding transcription factor activity | GO:0005515 protein binding	-	1	0.001	0.001		0	0	0	0	0	0	0
LOC102635075	#N/A	chr1	complement(19153310..19154103)	794	0.794	0	102635075	-	-	-	-	-	55677.4	0.0556774	0.001		0.0556774	0	0	0.111355	0	0	2
Tfap2b	protein_coding	chr1	19208914..19238845	29932	7.443	19	21419	transcription factor AP-2 beta	GO:0000122 negative regulation of transcription by RNA polymerase II | GO:0001822 kidney development | GO:0003091 renal water homeostasis | GO:0006006 glucose metabolic process | GO:0006355 regulation of transcription, DNA-templated | GO:0006357 regulation of transcription by RNA polymerase II | GO:0006366 transcription by RNA polymerase II | GO:0007423 sensory organ development | GO:0008284 posi…	GO:0005634 nucleus	GO:0000977 RNA polymerase II regulatory region sequence-specific DNA binding | GO:0000978 RNA polymerase II cis-regulatory region sequence-specific DNA binding | GO:0000981 DNA-binding transcription factor activity, RNA polymerase II-specific | GO:0000987 cis-regulatory region sequence-specific DNA binding | GO:0001228 DNA-binding transcription activator activity, RNA polymerase II-specific | GO:…	-	11456.4	0.0114564	0.001		0.0114564	0	0.00509417	0.0178186	0	1	3
LOC105243870	#N/A	chr1	19242601..19243771	1171	1.171	0	105243870	-	-	-	-	-	1	0.001	0.001		0	0	0	0	0	0	0
Gm4849	processed_pseudogene	chr1	19330942..19333675	2734	2.734	0	226901	predicted gene 4849	-	-	-	-	1	0.001	0.001		0	0	0	0	0	0	0
Gm32651	#N/A	chr1	19606089..19636734	30646	30.646	0	102635266	-	-	-	-	-	2.02919	0.00278241	0.00137119		0.00278241	0.00137119	0.00123722	0.0043276	1	1	3
Pkhd1	protein_coding	chr1	complement(20057779..20618082)	560304	15.294	72	241035	polycystic kidney and hepatic disease 1	GO:0001822 kidney development | GO:0006874 cellular calcium ion homeostasis | GO:0008284 positive regulation of cell population proliferation | GO:0010824 regulation of centrosome duplication | GO:0032006 regulation of TOR signaling | GO:0032088 negative regulation of NF-kappaB transcription factor activity | GO:0043066 negative regulation of apoptotic process | GO:0051898 negative regulation of …	GO:0005737 cytoplasm | GO:0005813 centrosome | GO:0005929 cilium | GO:0016324 apical plasma membrane | GO:0036064 ciliary basal body | GO:0048471 perinuclear region of cytoplasm | GO:0072686 mitotic spindle	GO:0005515 protein binding	-	8671.6	0.0086716	0.001		0.0086716	0	0	0.0173432	0	0	6
4930486I03Rik	lncRNA	chr1	20356454..20392300	35847	35.847	0	75028	RIKEN cDNA 4930486I03 gene	-	-	-	-	-6.75559	0.0114525	0.0773682		0.0114525	0.0773682	0.00317314	0.0197318	66	3	16
LOC105243871	#N/A	chr1	complement(20619335..20621734)	2400	2.4	0	105243871	-	-	-	-	-	1	0.001	0.001		0	0	0	0	0	0	0
Mir206	miRNA	chr1	20679010..20679082	73	0.073	0	387202	microRNA 206	GO:0007605 sensory perception of sound | GO:0071391 cellular response to estrogen stimulus | GO:1990830 cellular response to leukemia inhibitory factor	GO:0005634 nucleus	-	mmu05206 MicroRNAs in cancer	1	0.001	0.001		0	0	0	0	0	0	0
Mir133b	miRNA	chr1	20682769..20682887	119	0.119	0	723817	microRNA 133b	GO:0009617 response to bacterium | GO:0010628 positive regulation of gene expression | GO:0014043 negative regulation of neuron maturation | GO:0070482 response to oxygen levels	GO:0030424 axon	-	mmu05206 MicroRNAs in cancer	1	0.001	0.001		0	0	0	0	0	0	0
Il17a	protein_coding	chr1	20730905..20734496	3592	1.171	3	16171	interleukin 17A	GO:0006954 inflammatory response | GO:0010940 positive regulation of necrotic cell death | GO:0032747 positive regulation of interleukin-23 production | GO:0045672 positive regulation of osteoclast differentiation | GO:0045944 positive regulation of transcription by RNA polymerase II | GO:0050832 defense response to fungus | GO:0071347 cellular response to interleukin-1 | GO:0071385 cellular resp…	GO:0005576 extracellular region | GO:0005615 extracellular space | GO:0005737 cytoplasm | GO:0009897 external side of plasma membrane	GO:0005125 cytokine activity	mmu04060 Cytokine-cytokine receptor interaction | mmu05321 Inflammatory bowel disease (IBD) | mmu05323 Rheumatoid arthritis	536871	0.536871	0.001		0.536871	0	0.809477	0.264265	0	25	7
Il17f	protein_coding	chr1	complement(20777146..20785274)	8129	1.973	7	257630	interleukin 17F	GO:0006954 inflammatory response | GO:0016525 negative regulation of angiogenesis | GO:0017015 regulation of transforming growth factor beta receptor signaling pathway | GO:0042089 cytokine biosynthetic process | GO:0042109 lymphotoxin A biosynthetic process | GO:0045076 regulation of interleukin-2 biosynthetic process | GO:0045408 regulation of interleukin-6 biosynthetic process | GO:0045414 reg…	GO:0005576 extracellular region | GO:0005615 extracellular space	GO:0005125 cytokine activity | GO:0005126 cytokine receptor binding | GO:0019955 cytokine binding | GO:0042803 protein homodimerization activity	mmu05321 Inflammatory bowel disease (IBD)	251420	0.25142	0.001		0.25142	0	0.480435	0.0224064	0	25	1
Mcm3	protein_coding	chr1	complement(20803014..20820213)	17200	2.886	17	17215	minichromosome maintenance deficient 3 (S. cerevisiae)	GO:0000727 double-strand break repair via break-induced replication | GO:0006260 DNA replication | GO:0006267 pre-replicative complex assembly involved in nuclear cell cycle DNA replication | GO:0006270 DNA replication initiation | GO:0006271 DNA strand elongation involved in DNA replication | GO:0007049 cell cycle | GO:1902975 mitotic DNA replication initiation	GO:0005634 nucleus | GO:0005654 nucleoplasm | GO:0005737 cytoplasm | GO:0005813 centrosome | GO:0042555 MCM complex | GO:0048471 perinuclear region of cytoplasm	GO:0000166 nucleotide binding | GO:0003677 DNA binding | GO:0003688 DNA replication origin binding | GO:0003697 single-stranded DNA binding | GO:0004386 helicase activity | GO:0005524 ATP binding | GO:0016787 hydrolase activity	mmu03030 DNA replication | mmu04110 Cell cycle	2.99241	2.26568	0.757144	1	2.26568	0.757144	2.6013	1.93007	52	198	126
Gm20587	processed_pseudogene	chr1	20821331..20822515	1185	1.185	0	100417924	predicted gene, 20587	-	-	-	-	1	0.001	0.001		0	0	0	0	0	0	0
6720483E21Rik	lncRNA	chr1	complement(20888650..20890473)	1824	1.824	0	77741	RIKEN cDNA 6720483E21 gene	GO:0008150 biological_process	GO:0005575 cellular_component	GO:0003674 molecular_function	-	-23038.1	0.001	0.0230381		0	0.0230381	0	0	1	0	0
Paqr8	protein_coding	chr1	20890622..20939650	49029	5.447	6	74229	progestin and adipoQ receptor family member VIII	GO:0007275 multicellular organism development | GO:0030154 cell differentiation | GO:0048477 oogenesis | GO:0048545 response to steroid hormone	GO:0005794 Golgi apparatus | GO:0005886 plasma membrane | GO:0016020 membrane | GO:0016021 integral component of membrane	GO:0003707 steroid hormone receptor activity | GO:0005496 steroid binding | GO:0008289 lipid binding | GO:0038023 signaling receptor activity	-	14.0585	0.108456	0.00771461		0.108456	0.00771461	0.1601	0.056812	1	23	7
Efhc1	protein_coding	chr1	20951551..20990841	39291	2.357	13	71877	EF-hand domain (C-terminal) containing 1	GO:0000281 mitotic cytokinesis | GO:0006874 cellular calcium ion homeostasis | GO:0007052 mitotic spindle organization | GO:0021795 cerebral cortex cell migration | GO:0043065 positive regulation of apoptotic process | GO:0051302 regulation of cell division | GO:0060285 cilium-dependent cell motility	GO:0000922 spindle pole | GO:0005737 cytoplasm | GO:0005813 centrosome | GO:0005856 cytoskeleton | GO:0005929 cilium | GO:0005930 axoneme | GO:0043025 neuronal cell body | GO:0072686 mitotic spindle	GO:0005509 calcium ion binding | GO:0008022 protein C-terminus binding | GO:0043014 alpha-tubulin binding	-	18756	0.018756	0.001		0.018756	0	0	0.0375119	0	0	2
Tram2	protein_coding	chr1	complement(21001397..21079225)	77829	1.39	11	170829	translocating chain-associating membrane protein 2	GO:0006616 SRP-dependent cotranslational protein targeting to membrane, translocation | GO:0015031 protein transport | GO:0032964 collagen biosynthetic process | GO:0045048 protein insertion into ER membrane	GO:0005791 rough endoplasmic reticulum | GO:0016020 membrane | GO:0016021 integral component of membrane	GO:0005515 protein binding	-	1572.69	1.57269	0.001	1	1.57269	0	2.12765	1.01773	0	78	32
Tmem14a	protein_coding	chr1	21166436..21230167	63732	1.467	8	75712	transmembrane protein 14A	GO:0006839 mitochondrial transport | GO:0043066 negative regulation of apoptotic process | GO:1901029 negative regulation of mitochondrial outer membrane permeabilization involved in apoptotic signaling pathway	GO:0005739 mitochondrion | GO:0005783 endoplasmic reticulum | GO:0005789 endoplasmic reticulum membrane | GO:0016020 membrane | GO:0016021 integral component of membrane | GO:0031966 mitochondrial membrane	GO:0003674 molecular_function	-	73192.6	0.0731926	0.001		0.0731926	0	0.0258459	0.120539	0	1	4
Gm2693	unprocessed_pseudogene	chr1	21181783..21187864	6082	6.082	0	100040291	-	-	-	-	-	1	0.001	0.001		0	0	0	0	0	0	0
Gm32947	#N/A	chr1	complement(21189046..21195335)	6290	6.29	0	102635667	-	-	-	-	-	-1.90109	0.00351414	0.00668068		0.00351414	0.00668068	0	0.00702827	1	0	1
Gm28836	lncRNA	chr1	complement(21207234..21271685)	64452	64.452	0	102635593	-	-	-	-	-	1.06416	0.0173454	0.0162995		0.0173454	0.0162995	0.00588281	0.0288079	25	10	42
Gsta3	protein_coding	chr1	21240585..21265575	24991	1.61	9	14859	glutathione S-transferase, alpha 3	GO:0001657 ureteric bud development | GO:0006749 glutathione metabolic process | GO:0006805 xenobiotic metabolic process | GO:0046223 aflatoxin catabolic process	GO:0005737 cytoplasm | GO:0005829 cytosol	GO:0004364 glutathione transferase activity | GO:0016740 transferase activity	mmu00480 Glutathione metabolism | mmu00980 Metabolism of xenobiotics by cytochrome P450 | mmu00982 Drug metabolism - cytochrome P450 | mmu05204 Chemical carcinogenesis	10.5262	0.274736	0.0261003		0.274736	0.0261003	0.494555	0.0549166	1	21	2
LOC101056100	#N/A	chr1	21271798..21273126	1329	1.329	0	101056100	-	-	-	-	-	1	0.001	0.001		0	0	0	0	0	0	0
Gm4956	transcribed_unprocessed_pseudogene	chr1	complement(21285246..21298312)	13067	13.067	0	241041	predicted gene 4956	-	-	-	-	31417.8	0.0314178	0.001		0.0314178	0	0.00870496	0.0541307	0	3	16
Gm21909	unprocessed_pseudogene	chr1	complement(21312517..21341389)	28873	0.537	5	101056161	-	-	-	-	-	1	0.001	0.001		0	0	0	0	0	0	0
Khdc1a	protein_coding	chr1	21329476..21352200	22725	2.13	7	368204	KH domain containing 1A	GO:0006915 apoptotic process | GO:0006919 activation of cysteine-type endopeptidase activity involved in apoptotic process	GO:0005737 cytoplasm	GO:0003723 RNA binding | GO:0005515 protein binding | GO:0008266 poly(U) RNA binding | GO:0042802 identical protein binding	-	1	0.001	0.001		0	0	0	0	0	0	0
Khdc1c	protein_coding	chr1	21368331..21369743	1413	0.844	3	433278	KH domain containing 1C	GO:0006919 activation of cysteine-type endopeptidase activity involved in apoptotic process	GO:0005737 cytoplasm	GO:0003723 RNA binding	-	89848.1	0.0898481	0.001		0.0898481	0	0.179696	0	0	4	0
Gm33147	#N/A	chr1	complement(21369788..21384230)	14443	14.443	0	102635938	-	-	-	-	-	24486.8	0.0244868	0.001		0.0244868	0	0	0.0489736	0	0	16
Gm2709	unprocessed_pseudogene	chr1	21372356..21374170	1815	1.815	0	100040319	predicted gene 2709	-	-	-	-	1	0.001	0.001		0	0	0	0	0	0	0
Gm16533	processed_pseudogene	chr1	21379554..21380419	866	0.866	0	100379214	predited gene 16533	-	-	-	-	1	0.001	0.001		0	0	0	0	0	0	0
Khdc1b	protein_coding	chr1	21383556..21386384	2829	2.247	3	98582	KH domain containing 1B	GO:0006919 activation of cysteine-type endopeptidase activity involved in apoptotic process	GO:0005737 cytoplasm	GO:0003723 RNA binding | GO:0005515 protein binding | GO:0042802 identical protein binding	-	1	0.001	0.001		0	0	0	0	0	0	0
Kcnq5	protein_coding	chr1	complement(21398399..21962650)	564252	7.718	18	226922	potassium voltage-gated channel, subfamily Q, member 5	GO:0006811 ion transport | GO:0006813 potassium ion transport | GO:0034765 regulation of ion transmembrane transport | GO:0055085 transmembrane transport | GO:0071805 potassium ion transmembrane transport	GO:0005886 plasma membrane | GO:0005887 integral component of plasma membrane | GO:0008076 voltage-gated potassium channel complex | GO:0016020 membrane | GO:0016021 integral component of membrane | GO:0030118 clathrin coat	GO:0005216 ion channel activity | GO:0005244 voltage-gated ion channel activity | GO:0005249 voltage-gated potassium channel activity | GO:0005251 delayed rectifier potassium channel activity | GO:0005267 potassium channel activity | GO:0005516 calmodulin binding	mmu04725 Cholinergic synapse	-1.97123	0.0110482	0.0217784		0.0110482	0.0217784	0.00491266	0.0171837	4	1	3
Gm7658	processed_pseudogene	chr1	complement(21511867..21513096)	1230	1.23	0	665489	predicted gene 7658	-	-	-	-	1	0.001	0.001		0	0	0	0	0	0	0
Gm5696	processed_pseudogene	chr1	complement(22030053..22030615)	563	0.563	0	435612	predicted gene 5696	-	-	-	-	1	0.001	0.001		0	0	0	0	0	0	0
Rims1_1	#N/A	chr1	complement(22288422..22432843)	144422	2.189	17	116837	regulating synaptic membrane exocytosis 1	GO:0006836 neurotransmitter transport | GO:0006886 intracellular protein transport | GO:0006887 exocytosis | GO:0007269 neurotransmitter secretion | GO:0010628 positive regulation of gene expression | GO:0010808 positive regulation of synaptic vesicle priming | GO:0016081 synaptic vesicle docking | GO:0016082 synaptic vesicle priming | GO:0030154 cell differentiation | GO:0042391 regulation of me…	GO:0005886 plasma membrane | GO:0014069 postsynaptic density | GO:0016020 membrane | GO:0030054 cell junction | GO:0031982 vesicle | GO:0042734 presynaptic membrane | GO:0042995 cell projection | GO:0045202 synapse | GO:0048786 presynaptic active zone | GO:0048788 cytoskeleton of presynaptic active zone | GO:0060077 inhibitory synapse | GO:0098831 presynaptic active zone cytoplasmic component | G…	GO:0005515 protein binding | GO:0017124 SH3 domain binding | GO:0017137 Rab GTPase binding | GO:0019901 protein kinase binding | GO:0044325 ion channel binding | GO:0046872 metal ion binding | GO:0098882 structural constituent of presynaptic active zone	mmu04721 Synaptic vesicle cycle | mmu04723 Retrograde endocannabinoid signaling	10097.7	0.0100977	0.001		0.0100977	0	0	0.0201954	0	0	1
Rims1_2	#N/A	chr1	complement(22468191..22805724)	337534	1.877	15	116837	regulating synaptic membrane exocytosis 1	GO:0006836 neurotransmitter transport | GO:0006886 intracellular protein transport | GO:0006887 exocytosis | GO:0007269 neurotransmitter secretion | GO:0010628 positive regulation of gene expression | GO:0010808 positive regulation of synaptic vesicle priming | GO:0016081 synaptic vesicle docking | GO:0016082 synaptic vesicle priming | GO:0030154 cell differentiation | GO:0042391 regulation of me…	GO:0005886 plasma membrane | GO:0014069 postsynaptic density | GO:0016020 membrane | GO:0030054 cell junction | GO:0031982 vesicle | GO:0042734 presynaptic membrane | GO:0042995 cell projection | GO:0045202 synapse | GO:0048786 presynaptic active zone | GO:0048788 cytoskeleton of presynaptic active zone | GO:0060077 inhibitory synapse | GO:0098831 presynaptic active zone cytoplasmic component | G…	GO:0005515 protein binding | GO:0017124 SH3 domain binding | GO:0017137 Rab GTPase binding | GO:0019901 protein kinase binding | GO:0044325 ion channel binding | GO:0046872 metal ion binding | GO:0098882 structural constituent of presynaptic active zone	mmu04721 Synaptic vesicle cycle | mmu04723 Retrograde endocannabinoid signaling	-2.21656	0.0101001	0.0223876		0.0101001	0.0223876	0.0202003	0	1	1	0
Gm7759	#N/A	chr1	22898387..22905081	6695	6.695	0	665725	-	-	-	-	-	1	0.001	0.001		0	0	0	0	0	0	0
Gm7761	processed_pseudogene	chr1	complement(22984817..22986554)	1738	1.738	0	665731	-	-	-	-	-	1	0.001	0.001		0	0	0	0	0	0	0
4933415F23Rik	#N/A	chr1	complement(23100473..23102253)	1781	1.781	1	66755	RIKEN cDNA 4933415F23 gene	GO:0045087 innate immune response	GO:0005575 cellular_component	GO:0004865 protein serine/threonine phosphatase inhibitor activity	-	1	0.001	0.001		0	0	0	0	0	0	0
Gm30442	#N/A	chr1	23123989..23127725	3737	3.737	0	102632345	-	-	-	-	-	1	0.001	0.001		0	0	0	0	0	0	0
Gm29506	lncRNA	chr1	complement(23228493..23235658)	7166	7.166	0	102632273	-	-	-	-	-	1	0.001	0.001		0	0	0	0	0	0	0
Mir30a	miRNA	chr1	23272269..23272339	71	0.071	0	387225	microRNA 30a	GO:0007569 cell aging | GO:0009617 response to bacterium | GO:0035195 gene silencing by miRNA | GO:0035622 intrahepatic bile duct development | GO:0042552 myelination | GO:0060291 long-term synaptic potentiation | GO:0061009 common bile duct development | GO:0071230 cellular response to amino acid stimulus | GO:0071241 cellular response to inorganic substance | GO:0071361 cellular response to eth…	GO:0016442 RISC complex	-	mmu05206 MicroRNAs in cancer	1	0.001	0.001		0	0	0	0	0	0	0
Mir30c-2	miRNA	chr1	23291701..23291784	84	0.084	0	723964	microRNA 30c-2	GO:0009617 response to bacterium | GO:0010629 negative regulation of gene expression | GO:0045668 negative regulation of osteoblast differentiation | GO:0060291 long-term synaptic potentiation | GO:0071222 cellular response to lipopolysaccharide | GO:0071241 cellular response to inorganic substance | GO:1904322 cellular response to forskolin	GO:0016442 RISC complex	-	mmu05206 MicroRNAs in cancer	1	0.001	0.001		0	0	0	0	0	0	0
Gm20954	processed_pseudogene	chr1	complement(23345956..23346599)	644	0.644	0	100418001	predicted gene, 20954	-	-	-	-	1	0.001	0.001		0	0	0	0	0	0	0
Ogfrl1	protein_coding	chr1	complement(23366424..23383210)	16787	4.882	10	70155	opioid growth factor receptor-like 1	GO:0008150 biological_process	GO:0005575 cellular_component | GO:0016020 membrane	GO:0004985 opioid receptor activity | GO:0038023 signaling receptor activity	-	-2.99643	4.26289	12.7734	1	4.26289	12.7734	3.51821	5.00756	1484	453	553
Gm19673	#N/A	chr1	complement(23391747..23399959)	8213	8.213	0	100503399	-	-	-	-	-	18839.3	0.0188393	0.001		0.0188393	0	0	0.0376787	0	0	7
Gm7784	processed_pseudogene	chr1	23479520..23480729	1210	1.21	0	665782	predicted gene 7784	-	-	-	-	31335.4	0.0313354	0.001		0.0313354	0	0.0626709	0	0	2	0
LOC105243890	#N/A	chr1	23576379..23596862	20484	20.484	0	105243890	-	-	-	-	-	4.88484	0.0200418	0.00410286		0.0200418	0.00410286	0.005553	0.0345306	2	3	16
B3gat2	protein_coding	chr1	23761926..23847865	85940	4.362	4	280645	beta-1,3-glucuronyltransferase 2 (glucuronosyltransferase S)	GO:0005975 carbohydrate metabolic process | GO:0016051 carbohydrate biosynthetic process | GO:0050650 chondroitin sulfate proteoglycan biosynthetic process	GO:0000139 Golgi membrane | GO:0005794 Golgi apparatus | GO:0016020 membrane | GO:0016021 integral component of membrane	GO:0015018 galactosylgalactosylxylosylprotein 3-beta-glucuronosyltransferase activity | GO:0016740 transferase activity | GO:0046872 metal ion binding	mmu00514 Other types of O-glycan biosynthesis	16.5389	0.159328	0.00963353		0.159328	0.00963353	0.217308	0.101348	1	25	10
Smap1	protein_coding	chr1	complement(23844825..23922450)	77626	2.577	13	98366	small ArfGAP 1	GO:0031532 actin cytoskeleton reorganization | GO:0045648 positive regulation of erythrocyte differentiation | GO:2000369 regulation of clathrin-dependent endocytosis	GO:0005737 cytoplasm | GO:0005886 plasma membrane | GO:0016020 membrane	GO:0005096 GTPase activator activity | GO:0005515 protein binding | GO:0030276 clathrin binding | GO:0046872 metal ion binding	mmu04144 Endocytosis	-2.95166	5.18747	15.3117	1	5.18747	15.3117	5.9147	4.46024	939	402	260
LOC105242388	#N/A	chr1	complement(23919471..23922024)	2554	2.554	0	105242388	-	-	-	-	-	1	0.001	0.001		0	0	0	0	0	0	0
LOC105243891	#N/A	chr1	23978187..24005538	27352	27.352	0	105243891	-	-	-	-	-	3.60724	0.0166256	0.00460897		0.0166256	0.00460897	0.00415866	0.0290926	3	3	18
1110058L19Rik	#N/A	chr1	complement(23995939..24005640)	9702	0.667	3	68002	RIKEN cDNA 1110058L19 gene	GO:0003407 neural retina development | GO:0034553 mitochondrial respiratory chain complex II assembly | GO:0045087 innate immune response | GO:0045333 cellular respiration	GO:0005739 mitochondrion	GO:0008177 succinate dehydrogenase (ubiquinone) activity	-	-2.27086	0.582604	1.32301	1	0.582604	1.32301	0.966372	0.198836	21	17	3
Fam135a	protein_coding	chr1	complement(24010758..24100460)	89703	6.835	32	68187	family with sequence similarity 135, member A	GO:0044255 cellular lipid metabolic process	GO:0005575 cellular_component	-	-	-5.10436	0.146944	0.750054		0.146944	0.750054	0.0998517	0.194036	122	18	30
Gm30756	#N/A	chr1	24069715..24073152	3438	3.438	0	102632768	-	-	-	-	-	7.28934	0.0890951	0.0122227		0.0890951	0.0122227	0.0110285	0.167162	1	1	13
Col9a1	protein_coding	chr1	24177590..24252738	75149	4.241	42	12839	collagen, type IX, alpha 1	GO:0001501 skeletal system development | GO:0001894 tissue homeostasis | GO:0003417 growth plate cartilage development | GO:0030198 extracellular matrix organization | GO:0035988 chondrocyte proliferation | GO:0051216 cartilage development | GO:0060349 bone morphogenesis	GO:0005576 extracellular region | GO:0005581 collagen trimer | GO:0005594 collagen type IX trimer | GO:0005615 extracellular space | GO:0031012 extracellular matrix	GO:0005201 extracellular matrix structural constituent | GO:0046872 metal ion binding	mmu04974 Protein digestion and absorption	1.05203	0.0104239	0.00990839		0.0104239	0.00990839	0	0.0208478	1	0	2
Col19a1	protein_coding	chr1	complement(24257683..24588036)	330354	13.667	55	12823	collagen, type XIX, alpha 1	GO:0001763 morphogenesis of a branching structure | GO:0007155 cell adhesion | GO:0007160 cell-matrix adhesion | GO:0007275 multicellular organism development | GO:0007517 muscle organ development | GO:0007519 skeletal muscle tissue development | GO:0030154 cell differentiation | GO:0030198 extracellular matrix organization | GO:0098609 cell-cell adhesion	GO:0005576 extracellular region | GO:0005581 collagen trimer | GO:0005615 extracellular space | GO:0005911 cell-cell junction | GO:0031012 extracellular matrix	GO:0005201 extracellular matrix structural constituent | GO:0008201 heparin binding	-	-8.06105	0.0240296	0.193704		0.0240296	0.193704	0.00277427	0.045285	63	1	14
Tubb4b-ps2	processed_pseudogene	chr1	complement(24593931..24595489)	1559	1.559	0	665829	tubulin, beta 4B class IVB, pseudogene 2	-	-	-	-	1	0.001	0.001		0	0	0	0	0	0	0
Gm10222	unprocessed_pseudogene	chr1	complement(24612404..24612700)	297	0.297	0	100142658	predicted gene 10222	-	-	-	-	-1.62292	985.308	1599.08	1	985.308	1599.08	853.81	1116.81	11302	6688	7503
LOC100503946	#N/A	chr1	complement(24613971..24614651)	681	0.681	0	100503946	ATP synthase F0 subunit 6 pseudogene	-	-	-	-	-2.55078	892.644	2276.93	1	892.644	2276.93	768.896	1016.39	36900	13810	15657
Lmbrd1	protein_coding	chr1	24678544..24766301	87758	5.589	17	68421	LMBR1 domain containing 1	GO:0038016 insulin receptor internalization | GO:0043408 regulation of MAPK cascade | GO:0046325 negative regulation of glucose import | GO:0046627 negative regulation of insulin receptor signaling pathway | GO:0051898 negative regulation of protein kinase B signaling	GO:0005764 lysosome | GO:0005886 plasma membrane | GO:0016020 membrane | GO:0016021 integral component of membrane | GO:0045334 clathrin-coated endocytic vesicle	GO:0005158 insulin receptor binding | GO:0031419 cobalamin binding	mmu04977 Vitamin digestion and absorption	-2.46205	3.81115	9.38322	1	3.81115	9.38322	4.68776	2.93453	1248	691	371
Gm9443	processed_pseudogene	chr1	25011941..25012759	819	0.819	0	669171	-	-	-	-	-	23147.7	0.0231477	0.001		0.0231477	0	0.0462954	0	0	1	0
LOC105243892	#N/A	chr1	complement(25026587..25027593)	1007	1.007	0	105243892	-	-	-	-	-	87801.1	0.0878011	0.001		0.0878011	0	0	0.175602	0	0	4
Bai3	#N/A	chr1	complement(25067476..25830206)	762731	6.025	35	210933	brain-specific angiogenesis inhibitor 3	GO:0007165 signal transduction | GO:0007166 cell surface receptor signaling pathway | GO:0007186 G protein-coupled receptor signaling pathway | GO:0007189 adenylate cyclase-activating G protein-coupled receptor signaling pathway | GO:0007520 myoblast fusion | GO:0016322 neuron remodeling | GO:0016525 negative regulation of angiogenesis | GO:0048814 regulation of dendrite morphogenesis | GO:005196…	GO:0005886 plasma membrane | GO:0005887 integral component of plasma membrane | GO:0016020 membrane | GO:0016021 integral component of membrane | GO:0043083 synaptic cleft | GO:0098794 postsynapse	GO:0004888 transmembrane signaling receptor activity | GO:0004930 G protein-coupled receptor activity | GO:0005096 GTPase activator activity | GO:0005515 protein binding	-	34598.4	0.0345984	0.001		0.0345984	0	0.0251724	0.0440244	0	4	6
Gm20172	TEC	chr1	complement(25276404..25277954)	1551	1.551	1	100504323	predicted gene, 20172	-	-	-	-	57005.6	0.0570056	0.001		0.0570056	0	0	0.114011	0	0	4
Gm29214	processed_pseudogene	chr1	complement(25614130..25617251)	3122	3.122	0	102632997	-	-	-	-	-	1	0.001	0.001		0	0	0	0	0	0	0
LOC105243893	#N/A	chr1	25879168..25892305	13138	13.138	0	105243893	-	-	-	-	-	1.57804	0.00504732	0.00319847		0.00504732	0.00319847	0	0.0100946	1	0	3
Gm31076	#N/A	chr1	complement(25896970..25903608)	6639	6.639	0	102633186	-	-	-	-	-	7.36421	0.0466117	0.00632949		0.0466117	0.00632949	0	0.0932233	1	0	14
Gm19071	#N/A	chr1	complement(25993020..25994166)	1147	1.147	0	100418203	predicted gene, 19071	-	-	-	-	1	0.001	0.001		0	0	0	0	0	0	0
Gm18443	processed_pseudogene	chr1	complement(25996604..25997159)	556	0.556	0	100417198	predicted gene, 18443	-	-	-	-	39755.2	0.0397552	0.001		0.0397552	0	0	0.0795105	0	0	1
Gm19123	processed_pseudogene	chr1	26466236..26466886	651	0.651	0	100418295	predicted gene, 19123	-	-	-	-	1	0.001	0.001		0	0	0	0	0	0	0
Gm31136	#N/A	chr1	26616997..26775020	158024	158.024	0	102633272	-	-	-	-	-	3.30953	0.0237618	0.00717979		0.0237618	0.00717979	0.00863775	0.0388858	27	36	139
4931408C20Rik	protein_coding	chr1	complement(26681801..26687460)	5660	4.331	2	210940	RIKEN cDNA 4931408C20 gene	GO:0008150 biological_process	GO:0005575 cellular_component	GO:0003674 molecular_function	-	9480.92	0.00948092	0.001		0.00948092	0	0.00875454	0.0102073	0	1	1
Gm18179	#N/A	chr1	complement(27787873..27788664)	792	0.792	0	100416668	predicted gene, 18179	-	-	-	-	1	0.001	0.001		0	0	0	0	0	0	0
Gm5524	lncRNA	chr1	27884014..27902391	18378	18.378	0	433281	-	-	-	-	-	2.63007	0.00601369	0.00228651		0.00601369	0.00228651	0	0.0120274	1	0	5
Gm18776	processed_pseudogene	chr1	complement(27900419..27901072)	654	0.654	0	100417712	predicted gene, 18776	-	-	-	-	1	0.001	0.001		0	0	0	0	0	0	0
Gm19028	processed_pseudogene	chr1	27989910..27991781	1872	1.872	0	100418140	predicted gene, 19028	-	-	-	-	1	0.001	0.001		0	0	0	0	0	0	0
Gm7846	processed_pseudogene	chr1	complement(28580299..28580768)	470	0.47	0	665903	-	-	-	-	-	1	0.001	0.001		0	0	0	0	0	0	0
Gm597	protein_coding	chr1	complement(28776064..28895588)	119525	3.494	7	210962	predicted gene 597	GO:0008150 biological_process	GO:0005575 cellular_component	GO:0003674 molecular_function	-	12652.5	0.0126525	0.001		0.0126525	0	0	0.025305	0	0	2
Gm5697	processed_pseudogene	chr1	complement(28801035..28802802)	1768	1.768	0	435614	predicted gene 5697	-	-	-	-	1	0.001	0.001		0	0	0	0	0	0	0
Gm6462	processed_pseudogene	chr1	28938035..28938340	306	0.306	0	623924	-	-	-	-	-	1	0.001	0.001		0	0	0	0	0	0	0
Gm18033	processed_pseudogene	chr1	29219672..29220240	569	0.569	0	100416315	predicted gene, 18033	-	-	-	-	1	0.001	0.001		0	0	0	0	0	0	0
Mir6342	miRNA	chr1	29421488..29421612	125	0.125	0	102465174	microRNA 6342	-	-	-	-	1	0.001	0.001		0	0	0	0	0	0	0
Gm5525	processed_pseudogene	chr1	complement(29484524..29485934)	1411	1.411	0	433283	predicted gene 5525	-	-	-	-	2.85663	0.0850741	0.0297813		0.0850741	0.0297813	0.107487	0.0626617	1	4	2
Gm7858	processed_pseudogene	chr1	29930072..29930653	582	0.582	0	665944	predicted gene 7858	-	-	-	-	1	0.001	0.001		0	0	0	0	0	0	0
Gm31465	#N/A	chr1	complement(30121013..30138442)	17430	17.43	0	102633704	-	-	-	-	-	3804.46	0.00380446	0.001		0.00380446	0	0	0.00760892	0	0	3
Gm31525	#N/A	chr1	complement(30171744..30262611)	90868	90.868	0	102633779	-	-	-	-	-	-3.10177	0.00462181	0.0143358		0.00462181	0.0143358	0	0.00924361	31	0	19
LOC105243894	#N/A	chr1	complement(30482932..30755682)	272751	272.751	0	105243894	-	-	-	-	-	1.26157	0.0171041	0.0135577		0.0171041	0.0135577	0.0145963	0.0196118	88	105	121
Gm31581	#N/A	chr1	30502305..30516611	14307	14.307	0	102633854	-	-	-	-	-	-5874.25	0.001	0.00587425		0	0.00587425	0	0	2	0	0
Gm6473	unprocessed_pseudogene	chr1	30769687..30772337	2651	2.651	0	624138	predicted gene 6473	-	-	-	-	1	0.001	0.001		0	0	0	0	0	0	0
Gm2914	processed_pseudogene	chr1	complement(30790042..30794946)	4905	4.905	0	100040699	-	-	-	-	-	1	0.001	0.001		0	0	0	0	0	0	0
Phf3	protein_coding	chr1	complement(30802342..30873923)	71582	8.154	21	213109	PHD finger protein 3	GO:0008150 biological_process	GO:0005575 cellular_component	GO:0003674 molecular_function	-	-1.78942	4.40059	7.87452	1	4.40059	7.87452	4.33378	4.46741	1528	932	824
Gm7256	#N/A	chr1	30873148..30873786	639	0.639	0	638995	-	-	-	-	-	1	0.001	0.001		0	0	0	0	0	0	0
Ptp4a1	protein_coding	chr1	complement(30940303..30949765)	9463	4.446	9	19243	protein tyrosine phosphatase 4a1	GO:0007049 cell cycle | GO:0007275 multicellular organism development | GO:0016311 dephosphorylation | GO:0030335 positive regulation of cell migration	GO:0005634 nucleus | GO:0005737 cytoplasm | GO:0005768 endosome | GO:0005783 endoplasmic reticulum | GO:0005856 cytoskeleton | GO:0005886 plasma membrane | GO:0009898 cytoplasmic side of plasma membrane | GO:0016020 membrane	GO:0004721 phosphoprotein phosphatase activity | GO:0004725 protein tyrosine phosphatase activity | GO:0004727 prenylated protein tyrosine phosphatase activity | GO:0008138 protein tyrosine/serine/threonine phosphatase activity | GO:0016787 hydrolase activity | GO:0016791 phosphatase activity	-	-1.79597	11.1041	19.9427	1	11.1041	19.9427	10.2763	11.9319	2110	1205	1200
Gm32863	#N/A	chr1	30948970..30951023	2054	1.984	2	102635564	-	-	-	-	-	81200.3	0.0812003	0.001		0.0812003	0	0.0955542	0.0668465	0	5	3
Gm5698	protein_coding	chr1	complement(30977246..30977968)	723	0.723	0	435615	predicted gene 5698	GO:0008150 biological_process	GO:0005575 cellular_component	GO:0003674 molecular_function	-	1	0.001	0.001		0	0	0	0	0	0	0
Gm9458	processed_pseudogene	chr1	complement(30986164..30989128)	2965	2.965	0	669402	-	-	-	-	-	12787.8	0.0127878	0.001		0.0127878	0	0.0255756	0	0	2	0
Gm5699	#N/A	chr1	complement(30998186..30998908)	723	0.723	0	435616	predicted gene 5699	-	-	-	-	-1.90109	0.0305725	0.058121		0.0305725	0.058121	0	0.061145	1	0	1
Gm28644	lncRNA	chr1	31019096..31044774	25679	25.679	0	102634159	-	-	-	-	-	1.05203	0.00516467	0.00490924		0.00516467	0.00490924	0	0.0103293	3	0	6
Gm29669	#N/A	chr1	complement(31117532..31135201)	17670	17.67	0	102634473	-	-	-	-	-	-8.52808	0.00697145	0.0594531		0.00697145	0.0594531	0.00643733	0.00750557	25	3	3
4931428L18Rik	protein_coding	chr1	complement(31141078..31222656)	81579	81.579	0	70988	RIKEN cDNA 4931428L18 gene	GO:0008150 biological_process	GO:0005575 cellular_component	GO:0003674 molecular_function	-	6.16356	0.022224	0.00360571		0.022224	0.00360571	0.0195206	0.0249275	7	42	46
Gm7893	processed_pseudogene	chr1	31164439..31165408	970	0.97	0	666020	predicted gene 7893	-	-	-	-	22787.5	0.0227875	0.001		0.0227875	0	0	0.0455751	0	0	1
Lgsn	protein_coding	chr1	31176435..31204725	28291	1.903	5	266744	lengsin, lens protein with glutamine synthetase domain	GO:0006542 glutamine biosynthetic process | GO:0006807 nitrogen compound metabolic process | GO:0019740 nitrogen utilization	GO:0005737 cytoplasm | GO:0005886 plasma membrane | GO:0016020 membrane	GO:0003824 catalytic activity | GO:0004356 glutamate-ammonia ligase activity | GO:0005515 protein binding	-	1	0.001	0.001		0	0	0	0	0	0	0
Pih1d3	protein_coding	chr1	31222839..31224287	1449	1.449	1	74708	PIH1 domain containing 3	GO:0030317 flagellated sperm motility | GO:0070286 axonemal dynein complex assembly	GO:0005737 cytoplasm	GO:0005515 protein binding | GO:0051087 chaperone binding	-	1	0.001	0.001		0	0	0	0	0	0	0
Gm4850	processed_pseudogene	chr1	31264847..31268061	3215	3.215	0	226957	predicted pseudogene 4850	-	-	-	-	1	0.001	0.001		0	0	0	0	0	0	0
Gm28645	processed_pseudogene	chr1	31274902..31286913	12012	0.561	2	100505265	-	-	-	-	-	1	0.001	0.001		0	0	0	0	0	0	0
Gm6489	processed_pseudogene	chr1	31287083..31288051	969	0.969	0	624262	predicted gene 6489	-	-	-	-	22811.1	0.0228111	0.001		0.0228111	0	0	0.0456221	0	0	1
Gm10307	#N/A	chr1	31559606..31560831	1226	1.226	0	624275	predicted gene 10307	-	-	-	-	1	0.001	0.001		0	0	0	0	0	0	0
Gm19680	processed_pseudogene	chr1	31615304..31616843	1540	1.54	0	100503415	predicted gene, 19680	-	-	-	-	1	0.001	0.001		0	0	0	0	0	0	0
Gm7910	processed_pseudogene	chr1	31736050..31736889	840	0.84	0	666056	predicted gene 7910	-	-	-	-	1	0.001	0.001		0	0	0	0	0	0	0
Khdrbs2	protein_coding	chr1	32172688..32705224	532537	1.359	9	170771	KH domain containing, RNA binding, signal transduction associated 2	GO:0006397 mRNA processing | GO:0048024 regulation of mRNA splicing, via spliceosome	GO:0005634 nucleus	GO:0003676 nucleic acid binding | GO:0003723 RNA binding | GO:0005070 SH3/SH2 adaptor activity | GO:0005515 protein binding | GO:0008143 poly(A) binding | GO:0008266 poly(U) RNA binding | GO:0017124 SH3 domain binding | GO:0042169 SH2 domain binding | GO:0042802 identical protein binding	-	-30920.9	0.001	0.0309209		0	0.0309209	0	0	1	0	0
Gm9839	TEC	chr1	complement(32519563..32520999)	1437	1.437	1	408192	predicted gene 9839	GO:0008150 biological_process	GO:0005575 cellular_component	GO:0003674 molecular_function	mmu03013 RNA transport | mmu04310 Wnt signaling pathway	15382	0.015382	0.001		0.015382	0	0	0.030764	0	0	1
Gm5415	protein_coding	chr1	complement(32543546..32547293)	3748	3.748	1	408191	predicted gene 5415	GO:0016926 protein desumoylation	GO:0005634 nucleus	GO:0016929 SUMO-specific protease activity	mmu03013 RNA transport | mmu04310 Wnt signaling pathway	37085.8	0.0370858	0.001		0.0370858	0	0.0505815	0.0235901	0	5	2
Gm7114	processed_pseudogene	chr1	33100906..33102693	1788	1.788	0	633498	predicted gene 7114	-	-	-	-	1	0.001	0.001		0	0	0	0	0	0	0
Gm4785	processed_pseudogene	chr1	complement(33108910..33109657)	748	0.748	0	213711	predicted gene 4785	-	-	-	-	1	0.001	0.001		0	0	0	0	0	0	0
LOC105243895	#N/A	chr1	complement(33133237..33176263)	43027	43.027	0	105243895	-	-	-	-	-	1.21642	0.0320758	0.026369		0.0320758	0.026369	0.0158618	0.0482899	27	18	47
Gm2987	processed_pseudogene	chr1	33236945..33237589	645	0.645	0	100418410	predicted gene 2987	-	-	-	-	137079	0.137079	0.001		0.137079	0	0	0.274157	0	0	4
LOC105243896	#N/A	chr1	complement(33290823..33354602)	63780	63.78	0	105243896	-	-	-	-	-	1.30983	0.0181226	0.0138359		0.0181226	0.0138359	0.00713375	0.0291115	21	12	42
Gm18799	processed_pseudogene	chr1	complement(33315680..33316471)	792	0.792	0	100417744	predicted gene, 18799	-	-	-	-	1	0.001	0.001		0	0	0	0	0	0	0
Gm7933	processed_pseudogene	chr1	33371966..33373582	1617	1.617	0	666108	predicted gene 7933	-	-	-	-	-5.70326	0.0136697	0.0779619		0.0136697	0.0779619	0	0.0273394	3	0	1
Prim2	protein_coding	chr1	complement(33453808..33669794)	215987	3.462	23	19076	DNA primase, p58 subunit	GO:0006260 DNA replication | GO:0006269 DNA replication, synthesis of RNA primer	GO:0005658 alpha DNA polymerase:primase complex | GO:1990077 primosome complex	GO:0003677 DNA binding | GO:0003896 DNA primase activity | GO:0016779 nucleotidyltransferase activity | GO:0046872 metal ion binding | GO:0051536 iron-sulfur cluster binding | GO:0051539 4 iron, 4 sulfur cluster binding	mmu00230 Purine metabolism | mmu00240 Pyrimidine metabolism | mmu01100 Metabolic pathways | mmu03030 DNA replication	-1.55376	0.695263	1.08027	1	0.695263	1.08027	0.777593	0.612934	89	71	48
Gm29228	processed_pseudogene	chr1	33481402..33482821	1420	1.42	0	102634920	-	-	-	-	-	77830.7	0.0778307	0.001		0.0778307	0	0	0.155661	0	0	5
LOC105243897	#N/A	chr1	33518039..33530620	12582	12.582	0	105243897	-	-	-	-	-	1.05203	0.00702715	0.00667962		0.00702715	0.00667962	0	0.0140543	2	0	4
Gm17813	processed_pseudogene	chr1	33657689..33658673	985	0.985	0	100302654	predicted gene, 17813	-	-	-	-	96233.2	0.0962332	0.001		0.0962332	0	0.192466	0	0	5	0
1700001G17Rik	TEC	chr1	33669824..33670712	889	0.889	0	67503	RIKEN cDNA 1700001G17 gene	GO:0008150 biological_process	GO:0005575 cellular_component	GO:0003674 molecular_function	-	1	0.001	0.001		0	0	0	0	0	0	0
Gm32229	#N/A	chr1	complement(33714183..33721589)	7407	2.273	3	102634710	-	-	-	-	-	9.91942	0.183382	0.0184872		0.183382	0.0184872	0.016681	0.350084	1	1	18
Rab23	protein_coding	chr1	33719896..33742564	22669	4.587	12	19335	RAB23, member RAS oncogene family	GO:0000045 autophagosome assembly | GO:0001843 neural tube closure | GO:0006886 intracellular protein transport | GO:0006968 cellular defense response | GO:0007165 signal transduction | GO:0007275 multicellular organism development | GO:0007399 nervous system development | GO:0008589 regulation of smoothened signaling pathway | GO:0015031 protein transport | GO:0021513 spinal cord dorsal/ventral …	GO:0005737 cytoplasm | GO:0005768 endosome | GO:0005776 autophagosome | GO:0005813 centrosome | GO:0005829 cytosol | GO:0005886 plasma membrane | GO:0010008 endosome membrane | GO:0012505 endomembrane system | GO:0016020 membrane | GO:0030054 cell junction | GO:0031410 cytoplasmic vesicle | GO:0045335 phagocytic vesicle	GO:0000166 nucleotide binding | GO:0003924 GTPase activity | GO:0005525 GTP binding	mmu04340 Hedgehog signaling pathway	-2.90071	0.274762	0.797006		0.274762	0.797006	0.289308	0.260216	87	35	27
Bag2	protein_coding	chr1	complement(33745484..33757750)	12267	1.815	3	213539	BCL2-associated athanogene 2	GO:0010954 positive regulation of protein processing | GO:0019538 protein metabolic process | GO:0031397 negative regulation of protein ubiquitination | GO:0032091 negative regulation of protein binding | GO:0032436 positive regulation of proteasomal ubiquitin-dependent protein catabolic process | GO:0050821 protein stabilization | GO:1901800 positive regulation of proteasomal protein catabolic p…	GO:0005874 microtubule | GO:0030424 axon | GO:0030425 dendrite | GO:0101031 chaperone complex | GO:1901588 dendritic microtubule	GO:0000774 adenyl-nucleotide exchange factor activity | GO:0031072 heat shock protein binding | GO:0031625 ubiquitin protein ligase binding | GO:0042802 identical protein binding | GO:0044325 ion channel binding | GO:0048156 tau protein binding | GO:0051087 chaperone binding	mmu04141 Protein processing in endoplasmic reticulum	48713.9	0.0487139	0.001		0.0487139	0	0	0.0974277	0	0	4
Zfp451	protein_coding	chr1	complement(33761541..33815452)	53912	6.486	20	98403	zinc finger protein 451	GO:0010468 regulation of gene expression | GO:0016925 protein sumoylation | GO:0030512 negative regulation of transforming growth factor beta receptor signaling pathway | GO:0031060 regulation of histone methylation | GO:0060633 negative regulation of transcription initiation from RNA polymerase II promoter | GO:2000616 negative regulation of histone H3-K9 acetylation	GO:0005634 nucleus | GO:0035097 histone methyltransferase complex	GO:0000979 RNA polymerase II core promoter sequence-specific DNA binding | GO:0003676 nucleic acid binding | GO:0003677 DNA binding | GO:0003714 transcription corepressor activity | GO:0016740 transferase activity | GO:0046872 metal ion binding | GO:0061665 SUMO ligase activity	-	1.12879	1.38219	1.22449	1	1.38219	1.22449	1.66021	1.10417	189	284	162
Gm15455	processed_pseudogene	chr1	complement(33835899..33838914)	3016	3.016	1	433287	predicted gene 15455	-	-	-	-	29315.5	0.0293155	0.001		0.0293155	0	0	0.0586311	0	0	4
Bend6	protein_coding	chr1	complement(33852052..33907767)	55716	2.438	8	320705	BEN domain containing 6	GO:0007399 nervous system development | GO:0045666 positive regulation of neuron differentiation | GO:0045746 negative regulation of Notch signaling pathway	GO:0005634 nucleus	GO:0003682 chromatin binding | GO:0003714 transcription corepressor activity	-	1.77195	0.21379	0.120652		0.21379	0.120652	0.264385	0.163195	7	17	9
LOC102634918	#N/A	chr1	complement(33873086..33874756)	1671	1.671	0	102634918	-	-	-	-	-	1	0.001	0.001		0	0	0	0	0	0	0
Dst	protein_coding	chr1	33908208..34308662	400455	36.308	121	13518	dystonin	GO:0007010 cytoskeleton organization | GO:0007155 cell adhesion | GO:0007409 axonogenesis | GO:0008090 retrograde axonal transport | GO:0031110 regulation of microtubule polymerization or depolymerization | GO:0031122 cytoplasmic microtubule organization | GO:0031581 hemidesmosome assembly | GO:0042060 wound healing | GO:0045104 intermediate filament cytoskeleton organization | GO:0046907 intrace…	GO:0001725 stress fiber | GO:0005634 nucleus | GO:0005635 nuclear envelope | GO:0005737 cytoplasm | GO:0005783 endoplasmic reticulum | GO:0005789 endoplasmic reticulum membrane | GO:0005856 cytoskeleton | GO:0005874 microtubule | GO:0005882 intermediate filament | GO:0005886 plasma membrane | GO:0005925 focal adhesion | GO:0009898 cytoplasmic side of plasma membrane | GO:0014069 postsynaptic dens…	GO:0003779 actin binding | GO:0005198 structural molecule activity | GO:0005509 calcium ion binding | GO:0005515 protein binding | GO:0008017 microtubule binding | GO:0008092 cytoskeletal protein binding | GO:0042803 protein homodimerization activity | GO:0046872 metal ion binding	-	-2.26118	3.35459	7.58535	1	3.35459	7.58535	3.62993	3.07926	6554	3476	2529
LOC105243899	#N/A	chr1	33974289..34002509	28221	28.221	0	105243899	-	-	-	-	-	1	0.001	0.001		0	0	0	0	0	0	0
Mir6896	miRNA	chr1	34117359..34117431	73	0.073	0	102466987	microRNA 6896	-	-	-	-	1	0.001	0.001		0	0	0	0	0	0	0
LOC105243898	#N/A	chr1	complement(34122342..34135083)	12742	12.742	0	105243898	-	-	-	-	-	11.5156	0.189884	0.0164894		0.189884	0.0164894	0.17854	0.201229	5	60	58
Gm5266	processed_pseudogene	chr1	34367374..34369003	1630	1.63	0	383629	predicted gene 5266	-	-	-	-	1	0.001	0.001		0	0	0	0	0	0	0
Mir5103	miRNA	chr1	complement(34433121..34433199)	79	0.079	0	100628580	microRNA 5103	-	-	-	-	1	0.001	0.001		0	0	0	0	0	0	0
n-Te21	#N/A	chr1	complement(34434812..34434883)	72	0.072	0	102467303	Derived by automated computational analysis using gene prediction method: tRNAscan-SE.	GO:0008150 biological_process	GO:0005575 cellular_component	GO:0003674 molecular_function	-	4.13325	2.4123	0.583632	1	2.4123	0.583632	0.52661	4.29798	1	1	7
Ccdc115	protein_coding	chr1	complement(34436670..34439672)	3003	1.705	5	69668	coiled-coil domain containing 115	GO:0006879 cellular iron ion homeostasis | GO:0007042 lysosomal lumen acidification | GO:0036295 cellular response to increased oxygen levels | GO:0070072 vacuolar proton-transporting V-type ATPase complex assembly | GO:1905146 lysosomal protein catabolic process	GO:0005764 lysosome | GO:0005768 endosome | GO:0005783 endoplasmic reticulum | GO:0005793 endoplasmic reticulum-Golgi intermediate compartment | GO:0016471 vacuolar proton-transporting V-type ATPase complex | GO:0030137 COPI-coated vesicle | GO:0031410 cytoplasmic vesicle | GO:0042406 extrinsic component of endoplasmic reticulum membrane	GO:0051082 unfolded protein binding	-	1.99161	4.46675	2.24279	1	4.46675	2.24279	4.91461	4.01889	91	221	155
Imp4	protein_coding	chr1	34439829..34445747	5919	2.249	9	27993	IMP4, U3 small nucleolar ribonucleoprotein, homolog (yeast)	GO:0006364 rRNA processing | GO:0042254 ribosome biogenesis	GO:0001650 fibrillar center | GO:0005634 nucleus | GO:0005730 nucleolus | GO:0030684 preribosome | GO:0032040 small-subunit processome | GO:0034457 Mpp10 complex	GO:0030515 snoRNA binding	mmu03008 Ribosome biogenesis in eukaryotes	-2.06401	2.66145	5.49325	1	2.66145	5.49325	2.51199	2.8109	294	149	143
Gm32504	#N/A	chr1	complement(34459009..34459827)	819	0.819	0	102635078	-	-	-	-	-	717578	0.717578	0.001		0.717578	0	1.43516	0	0	31	0
Ptpn18	protein_coding	chr1	34459746..34473784	14039	1.578	16	19253	protein tyrosine phosphatase, non-receptor type 18	GO:0001825 blastocyst formation | GO:0006470 protein dephosphorylation | GO:0016311 dephosphorylation | GO:0035335 peptidyl-tyrosine dephosphorylation	GO:0005634 nucleus | GO:0005737 cytoplasm	GO:0004721 phosphoprotein phosphatase activity | GO:0004725 protein tyrosine phosphatase activity | GO:0004726 non-membrane spanning protein tyrosine phosphatase activity | GO:0005515 protein binding | GO:0016787 hydrolase activity | GO:0016791 phosphatase activity	-	1.65372	2.33401	1.41137	1	2.33401	1.41137	2.42681	2.24121	53	101	80
Gm32566	#N/A	chr1	34474787..34485981	11195	11.195	0	102635157	-	-	-	-	-	5.08611	0.0572736	0.0112608		0.0572736	0.0112608	0.047416	0.0671311	3	14	17
4930568A12Rik	lncRNA	chr1	complement(34477167..34499219)	22053	22.053	0	75883	-	-	-	-	-	3.22152	0.0859393	0.0266767		0.0859393	0.0266767	0.0876847	0.0841939	14	51	42
Prss39	protein_coding	chr1	34498430..34503062	4633	1.246	5	21755	protease, serine 39	GO:0006508 proteolysis	GO:0005576 extracellular region | GO:0005615 extracellular space | GO:0031410 cytoplasmic vesicle	GO:0004252 serine-type endopeptidase activity	-	1	0.001	0.001		0	0	0	0	0	0	0
Cfc1	protein_coding	chr1	34535648..34544311	8664	1.038	6	12627	cripto, FRL-1, cryptic family 1	GO:0001568 blood vessel development | GO:0001889 liver development | GO:0001947 heart looping | GO:0003007 heart morphogenesis | GO:0007275 multicellular organism development | GO:0007368 determination of left/right symmetry | GO:0007369 gastrulation | GO:0007492 endoderm development | GO:0007507 heart development | GO:0009791 post-embryonic development | GO:0009952 anterior/posterior pattern spe…	GO:0005576 extracellular region | GO:0005886 plasma membrane | GO:0009986 cell surface | GO:0016020 membrane | GO:0031225 anchored component of membrane	GO:0005102 signaling receptor binding | GO:0038100 nodal binding | GO:0070697 activin receptor binding	-	1	0.001	0.001		0	0	0	0	0	0	0
Prss40	protein_coding	chr1	complement(34536515..34560993)	24479	2.292	18	21756	protease, serine 40	GO:0006508 proteolysis	GO:0005576 extracellular region | GO:0005615 extracellular space | GO:0031410 cytoplasmic vesicle	GO:0004252 serine-type endopeptidase activity | GO:0008233 peptidase activity | GO:0008236 serine-type peptidase activity | GO:0016787 hydrolase activity	-	28931.8	0.0289318	0.001		0.0289318	0	0	0.0578637	0	0	3
Gm28419	processed_pseudogene	chr1	complement(34538065..34538562)	498	0.498	0	102635016	-	-	-	-	-	1	0.001	0.001		0	0	0	0	0	0	0
Gm19225	#N/A	chr1	34571217..34571942	726	0.726	0	100418459	predicted gene, 19225	-	-	-	-	1	0.001	0.001		0	0	0	0	0	0	0
Amer3	protein_coding	chr1	34578935..34590948	12014	5.138	5	211383	APC membrane recruitment 3	GO:0016055 Wnt signaling pathway | GO:0060828 regulation of canonical Wnt signaling pathway	GO:0005886 plasma membrane | GO:0016020 membrane	GO:0005546 phosphatidylinositol-4,5-bisphosphate binding | GO:0008013 beta-catenin binding | GO:0008289 lipid binding	-	-11.4065	0.00430205	0.0490714		0.00430205	0.0490714	0	0.00860409	6	0	1
Gm29730	processed_pseudogene	chr1	complement(34610989..34615280)	4292	4.292	0	101055845	-	-	-	-	-	25750.1	0.0257501	0.001		0.0257501	0	0	0.0515003	0	0	5
AA619741	processed_pseudogene	chr1	complement(34633535..34636210)	2676	2.676	0	241051	expressed sequence AA619741	-	-	-	-	8260.06	0.00826006	0.001		0.00826006	0	0	0.0165201	0	0	1
LOC102642976	#N/A	chr1	complement(34657236..34667004)	9769	9.769	0	102642976	-	-	-	-	-	15838.6	0.0158386	0.001		0.0158386	0	0	0.0316772	0	0	7
Gm32920	#N/A	chr1	complement(34685665..34688842)	3178	3.178	0	102635632	-	-	-	-	-	1	0.001	0.001		0	0	0	0	0	0	0
Gm32790	#N/A	chr1	complement(34759936..34792556)	32621	32.621	0	102635458	-	-	-	-	-	-2.52705	0.0596412	0.150716		0.0596412	0.150716	0.040681	0.0786013	117	35	58
Arhgef4	protein_coding	chr1	34801722..34812754	11033	2.714	10	226970	Rho guanine nucleotide exchange factor (GEF) 4	GO:0030032 lamellipodium assembly | GO:0035023 regulation of Rho protein signal transduction | GO:0035556 intracellular signal transduction | GO:0046847 filopodium assembly	GO:0005737 cytoplasm	GO:0005085 guanyl-nucleotide exchange factor activity | GO:0005089 Rho guanyl-nucleotide exchange factor activity | GO:0019904 protein domain specific binding | GO:0030676 Rac guanyl-nucleotide exchange factor activity	mmu04810 Regulation of actin cytoskeleton	4.62932	0.358384	0.0774161		0.358384	0.0774161	0.0977934	0.618975	5	7	38
Fam168b	protein_coding	chr1	complement(34813218..34843050)	29833	5.08	11	214469	family with sequence similarity 168, member B	GO:0008150 biological_process	GO:0005737 cytoplasm | GO:0005886 plasma membrane | GO:0016020 membrane | GO:0016021 integral component of membrane | GO:0042995 cell projection	GO:0003674 molecular_function	-	1.16279	8.16615	7.02288	1	8.16615	7.02288	8.87441	7.4579	849	1189	857
Plekhb2	protein_coding	chr1	34849959..34879585	29627	5.629	12	226971	pleckstrin homology domain containing, family B (evectins) member 2	GO:0045595 regulation of cell differentiation	GO:0005768 endosome | GO:0016020 membrane | GO:0016021 integral component of membrane	GO:0005547 phosphatidylinositol-3,4,5-trisphosphate binding	-	-1.38002	6.97283	9.62261	1	6.97283	9.62261	8.95863	4.98703	1289	1330	635
LOC105243900	#N/A	chr1	complement(34878640..34881424)	2785	2.785	0	105243900	-	-	-	-	-	7.86787	0.356143	0.0452655		0.356143	0.0452655	0.394815	0.317471	3	29	20
Gm19430	processed_pseudogene	chr1	34923475..34930643	7169	7.169	0	100502882	-	-	-	-	-	2644.43	0.00264443	0.001		0.00264443	0	0.00528887	0	0	1	0
Gm8009	processed_pseudogene	chr1	34970057..34970561	505	0.505	0	666261	predicted gene 8009	-	-	-	-	1	0.001	0.001		0	0	0	0	0	0	0
1110002O04Rik	lncRNA	chr1	35869588..35881165	11578	11.578	0	68483	-	-	-	-	-	1.50318	0.0109113	0.00725885		0.0109113	0.00725885	0.00654964	0.015273	2	2	4
Gm33176	#N/A	chr1	35942013..35955014	13002	13.002	0	102635977	-	-	-	-	-	11900.3	0.0119003	0.001		0.0119003	0	0	0.0238006	0	0	7
Gm8022	processed_pseudogene	chr1	35958935..35959816	882	0.882	0	666283	predicted gene 8022	-	-	-	-	1	0.001	0.001		0	0	0	0	0	0	0
LOC105243901	#N/A	chr1	35959999..35965098	5100	5.1	0	105243901	-	-	-	-	-	-1.10828	0.00743449	0.0082395		0.00743449	0.0082395	0.014869	0	1	2	0
Gm33222	lncRNA	chr1	complement(36001939..36011073)	9135	9.135	0	102636039	-	-	-	-	-	1.69083	0.0311117	0.0184002		0.0311117	0.0184002	0.00415062	0.0580727	4	1	12
LOC105243902	#N/A	chr1	36016795..36021488	4694	4.694	0	105243902	-	-	-	-	-	1	0.001	0.001		0	0	0	0	0	0	0
LOC105243903	#N/A	chr1	complement(36058718..36066243)	7526	7.526	0	105243903	-	-	-	-	-	6.16245	0.0344081	0.00558351		0.0344081	0.00558351	0.010076	0.0587401	1	2	10
Hs6st1	protein_coding	chr1	36068400..36106446	38047	3.719	2	50785	heparan sulfate 6-O-sulfotransferase 1	GO:0001525 angiogenesis | GO:0015012 heparan sulfate proteoglycan biosynthetic process | GO:0015015 heparan sulfate proteoglycan biosynthetic process, enzymatic modification | GO:0048286 lung alveolus development | GO:0048666 neuron development | GO:0060716 labyrinthine layer blood vessel development	GO:0005654 nucleoplasm | GO:0016020 membrane | GO:0016021 integral component of membrane | GO:0016607 nuclear speck	GO:0008146 sulfotransferase activity | GO:0016740 transferase activity | GO:0017095 heparan sulfate 6-O-sulfotransferase activity	mmu00534 Glycosaminoglycan biosynthesis - heparan sulfate / heparin	-2.11014	1.63853	3.45753	1	1.63853	3.45753	2.17157	1.10549	306	213	93
Gm33280	lncRNA	chr1	36131836..36137221	5386	5.386	0	102636118	-	-	-	-	-	82124.9	0.0821249	0.001		0.0821249	0	0.147834	0.0164158	0	21	2
Uggt1	protein_coding	chr1	complement(36140028..36244302)	104275	9.161	47	320011	UDP-glucose glycoprotein glucosyltransferase 1	GO:0006486 protein glycosylation | GO:0018279 protein N-linked glycosylation via asparagine | GO:0071712 ER-associated misfolded protein catabolic process	GO:0005783 endoplasmic reticulum | GO:0005788 endoplasmic reticulum lumen | GO:0005793 endoplasmic reticulum-Golgi intermediate compartment | GO:0032991 protein-containing complex	GO:0003980 UDP-glucose:glycoprotein glucosyltransferase activity | GO:0005515 protein binding | GO:0016740 transferase activity | GO:0016757 transferase activity, transferring glycosyl groups | GO:0051082 unfolded protein binding	mmu04141 Protein processing in endoplasmic reticulum	-1.31095	5.00705	6.56399	1	5.00705	6.56399	4.73483	5.27927	1431	1144	1094
Mir6897	miRNA	chr1	complement(36144252..36144313)	62	0.062	0	102465540	microRNA 6897	-	-	-	-	1	0.001	0.001		0	0	0	0	0	0	0
Gm18750	#N/A	chr1	complement(36177669..36179017)	1349	1.349	0	100417669	predicted gene, 18750	-	-	-	-	1	0.001	0.001		0	0	0	0	0	0	0
LOC105243904	#N/A	chr1	36244414..36250542	6129	6.129	0	105243904	-	-	-	-	-	25.3294	0.173663	0.00685617		0.173663	0.00685617	0.123726	0.2236	1	20	31
Neurl3	protein_coding	chr1	complement(36264602..36274674)	10073	2.971	11	214854	neuralized homolog 3 homolog (Drosophila)	GO:0016567 protein ubiquitination | GO:0070086 ubiquitin-dependent endocytosis	GO:0005769 early endosome	GO:0016740 transferase activity | GO:0046872 metal ion binding | GO:0061630 ubiquitin protein ligase activity	-	1.16154	10.1858	8.76921	1	10.1858	8.76921	12.1877	8.18388	620	955	550
Arid5a	protein_coding	chr1	36307706..36324036	16331	10.133	13	214855	AT rich interactive domain 5A (MRF1-like)	GO:0000122 negative regulation of transcription by RNA polymerase II | GO:0002062 chondrocyte differentiation | GO:0002376 immune system process | GO:0006357 regulation of transcription by RNA polymerase II | GO:0035066 positive regulation of histone acetylation | GO:0045087 innate immune response | GO:0045944 positive regulation of transcription by RNA polymerase II | GO:0071222 cellular respons…	GO:0005634 nucleus | GO:0005654 nucleoplasm | GO:0005667 transcription factor complex | GO:0005730 nucleolus	GO:0001227 DNA-binding transcription repressor activity, RNA polymerase II-specific | GO:0003677 DNA binding | GO:0003682 chromatin binding | GO:0003714 transcription corepressor activity | GO:0003723 RNA binding | GO:0005515 protein binding | GO:0008134 transcription factor binding | GO:0030331 estrogen receptor binding | GO:0035613 RNA stem-loop binding | GO:0043565 sequence-specific DNA bindin…	-	1.7581	1.08633	0.617902	1	1.08633	0.617902	1.02526	1.14741	149	274	263
Kansl3	protein_coding	chr1	complement(36329947..36369194)	39248	9.115	30	226976	KAT8 regulatory NSL complex subunit 3	GO:0006325 chromatin organization | GO:0043981 histone H4-K5 acetylation | GO:0043982 histone H4-K8 acetylation | GO:0043984 histone H4-K16 acetylation	GO:0000123 histone acetyltransferase complex | GO:0005634 nucleus | GO:0005654 nucleoplasm | GO:0043231 intracellular membrane-bounded organelle | GO:0044545 NSL complex	GO:0043995 histone acetyltransferase activity (H4-K5 specific) | GO:0043996 histone acetyltransferase activity (H4-K8 specific) | GO:0046972 histone acetyltransferase activity (H4-K16 specific)	-	-1.31047	1.22776	1.60894	1	1.22776	1.60894	1.16056	1.29495	349	279	267
Mir6898	miRNA	chr1	complement(36348682..36348758)	77	0.077	0	102465541	microRNA 6898	-	-	-	-	1	0.001	0.001		0	0	0	0	0	0	0
Fer1l5	protein_coding	chr1	36372199..36422110	49912	6.562	62	100534273	fer-1-like 5 (C. elegans)	GO:0007009 plasma membrane organization | GO:0007520 myoblast fusion | GO:0061025 membrane fusion	GO:0005575 cellular_component | GO:0005886 plasma membrane | GO:0016020 membrane | GO:0016021 integral component of membrane	GO:0003674 molecular_function	-	3368.47	0.00336847	0.001		0.00336847	0	0	0.00673694	0	0	1
Lman2l	protein_coding	chr1	complement(36423183..36445271)	22089	2.293	12	214895	lectin, mannose-binding 2-like	GO:0006888 endoplasmic reticulum to Golgi vesicle-mediated transport | GO:0007029 endoplasmic reticulum organization | GO:0007030 Golgi organization | GO:0015031 protein transport	GO:0000139 Golgi membrane | GO:0005783 endoplasmic reticulum | GO:0005789 endoplasmic reticulum membrane | GO:0005793 endoplasmic reticulum-Golgi intermediate compartment | GO:0005794 Golgi apparatus | GO:0016020 membrane | GO:0016021 integral component of membrane | GO:0030134 COPII-coated ER to Golgi transport vesicle	GO:0005537 mannose binding | GO:0030246 carbohydrate binding | GO:0046872 metal ion binding	-	-4.09481	2.10344	8.61321	1	2.10344	8.61321	1.95119	2.2557	470	118	117
Gm33401	#N/A	chr1	36461978..36462745	768	0.768	0	102636293	-	-	-	-	-	1	0.001	0.001		0	0	0	0	0	0	0
Gm33454	#N/A	chr1	complement(36464718..36471546)	6829	6.829	0	102636368	-	-	-	-	-	-1.18818	0.0258942	0.0307669		0.0258942	0.0307669	0	0.0517884	5	0	8
Cnnm4	protein_coding	chr1	36471597..36508776	37180	4.582	7	94220	cyclin M4	GO:0006810 transport | GO:0006811 ion transport | GO:0007601 visual perception | GO:0010960 magnesium ion homeostasis | GO:0015693 magnesium ion transport | GO:0031214 biomineral tissue development | GO:0050896 response to stimulus | GO:0055065 metal ion homeostasis | GO:0070166 enamel mineralization	GO:0005886 plasma membrane | GO:0016020 membrane | GO:0016021 integral component of membrane | GO:0016323 basolateral plasma membrane | GO:0030425 dendrite | GO:0032991 protein-containing complex | GO:0043025 neuronal cell body	GO:0015081 sodium ion transmembrane transporter activity | GO:0015095 magnesium ion transmembrane transporter activity | GO:0022857 transmembrane transporter activity	-	-2.67361	0.977604	2.61373	1	0.977604	2.61373	1.24124	0.713963	285	150	74
Cnnm3	protein_coding	chr1	36511856..36528237	16382	5.303	12	94218	cyclin M3	GO:0006810 transport | GO:0006811 ion transport	GO:0005886 plasma membrane | GO:0016020 membrane | GO:0016021 integral component of membrane	GO:0022857 transmembrane transporter activity	-	-2.15454	1.11807	2.40892	1	1.11807	2.40892	1.29413	0.942011	304	181	113
Ankrd23	protein_coding	chr1	complement(36530188..36536883)	6696	2.687	11	78321	ankyrin repeat domain 23	GO:0006631 fatty acid metabolic process | GO:0035994 response to muscle stretch | GO:0060297 regulation of sarcomere organization	GO:0005634 nucleus | GO:0005654 nucleoplasm | GO:0005829 cytosol | GO:0014704 intercalated disc | GO:0015629 actin cytoskeleton | GO:0030016 myofibril | GO:0031674 I band	GO:0031432 titin binding	-	3.88768	0.851182	0.218943		0.851182	0.218943	1.14298	0.559385	14	81	34
Ankrd39	protein_coding	chr1	complement(36538173..36547440)	9268	2.226	9	109346	ankyrin repeat domain 39	GO:0008150 biological_process	GO:0005575 cellular_component	GO:0003674 molecular_function	-	-1.73937	0.618627	1.07602	1	0.618627	1.07602	0.442863	0.79439	57	26	40
Sema4c	protein_coding	chr1	complement(36548640..36558381)	9742	5.037	24	20353	sema domain, immunoglobulin domain (Ig), transmembrane domain (TM) and short cytoplasmic domain, (semaphorin) 4C	GO:0001755 neural crest cell migration | GO:0001843 neural tube closure | GO:0007275 multicellular organism development | GO:0007399 nervous system development | GO:0021535 cell migration in hindbrain | GO:0021549 cerebellum development | GO:0030154 cell differentiation | GO:0030335 positive regulation of cell migration | GO:0032874 positive regulation of stress-activated MAPK cascade | GO:004269…	GO:0005615 extracellular space | GO:0005886 plasma membrane | GO:0005887 integral component of plasma membrane | GO:0014069 postsynaptic density | GO:0016020 membrane | GO:0016021 integral component of membrane | GO:0030054 cell junction | GO:0030672 synaptic vesicle membrane | GO:0031410 cytoplasmic vesicle | GO:0045202 synapse | GO:0045211 postsynaptic membrane	GO:0005515 protein binding | GO:0030215 semaphorin receptor binding | GO:0045499 chemorepellent activity	mmu04360 Axon guidance	-4.04617	0.164947	0.667405		0.164947	0.667405	0.233352	0.0965428	80	31	11
Fam178b	protein_coding	chr1	complement(36562696..36683190)	120495	3.009	27	381337	family with sequence similarity 178, member B	GO:0008150 biological_process	GO:0005575 cellular_component	GO:0003674 molecular_function	-	14691.9	0.0146919	0.001		0.0146919	0	0	0.0293837	0	0	2
Cox5b	protein_coding	chr1	36691487..36693388	1902	0.569	4	12859	cytochrome c oxidase subunit Vb	GO:0006123 mitochondrial electron transport, cytochrome c to oxygen | GO:0042776 mitochondrial ATP synthesis coupled proton transport	GO:0005739 mitochondrion | GO:0005743 mitochondrial inner membrane | GO:0043209 myelin sheath	GO:0004129 cytochrome-c oxidase activity	mmu00190 Oxidative phosphorylation | mmu01100 Metabolic pathways | mmu04260 Cardiac muscle contraction | mmu04932 Non-alcoholic fatty liver disease (NAFLD) | mmu05010 Alzheimer's disease | mmu05012 Parkinson's disease | mmu05016 Huntington's disease	-1.55321	20.7308	32.1992	1	20.7308	32.1992	28.2537	13.208	436	424	170
Actr1b	protein_coding	chr1	complement(36698114..36710017)	11904	3.401	16	226977	ARP1 actin-related protein 1B, centractin beta	GO:0000132 establishment of mitotic spindle orientation | GO:0030473 nuclear migration along microtubule	GO:0005737 cytoplasm | GO:0005813 centrosome | GO:0005856 cytoskeleton | GO:0005869 dynactin complex | GO:0015630 microtubule cytoskeleton | GO:0099738 cell cortex region	GO:0000166 nucleotide binding | GO:0005524 ATP binding | GO:0106006 microtubule cortical anchor activity	-	-1.37716	2.47623	3.41015	1	2.47623	3.41015	3.05468	1.89778	276	274	146
4933424G06Rik	protein_coding	chr1	36714538..36757960	43423	43.423	0	71166	RIKEN cDNA 4933424G06 gene	-	-	-	-	1.06278	0.0359967	0.0338703		0.0359967	0.0338703	0.00174635	0.0702471	35	2	69
Gm33533	lncRNA	chr1	complement(36715718..36744742)	29025	29.025	0	102636476	-	-	-	-	-	-1.07401	0.041788	0.0448808		0.041788	0.0448808	0.0378832	0.0456928	31	29	30
Zap70	protein_coding	chr1	36761798..36782821	21024	2.913	18	22637	zeta-chain (TCR) associated protein kinase	GO:0002250 adaptive immune response | GO:0002376 immune system process | GO:0006468 protein phosphorylation | GO:0006955 immune response | GO:0016310 phosphorylation | GO:0018108 peptidyl-tyrosine phosphorylation | GO:0035556 intracellular signal transduction | GO:0043366 beta selection | GO:0045059 positive thymic T cell selection | GO:0045060 negative thymic T cell selection | GO:0045061 thymic…	GO:0001772 immunological synapse | GO:0005737 cytoplasm | GO:0005829 cytosol | GO:0005886 plasma membrane | GO:0005911 cell-cell junction | GO:0016020 membrane | GO:0042101 T cell receptor complex | GO:0045121 membrane raft	GO:0000166 nucleotide binding | GO:0001784 phosphotyrosine residue binding | GO:0004672 protein kinase activity | GO:0004713 protein tyrosine kinase activity | GO:0004715 non-membrane spanning protein tyrosine kinase activity | GO:0005515 protein binding | GO:0005524 ATP binding | GO:0016301 kinase activity | GO:0016740 transferase activity	mmu04014 Ras signaling pathway | mmu04064 NF-kappa B signaling pathway | mmu04650 Natural killer cell mediated cytotoxicity | mmu04660 T cell receptor signaling pathway | mmu05340 Primary immunodeficiency	-1.84361	0.289509	0.533743		0.289509	0.533743	0.260322	0.318697	37	20	21
Gm18828	transcribed_processed_pseudogene	chr1	complement(36765018..36765883)	866	0.866	0	100417791	predicted gene, 18828	-	-	-	-	1	0.001	0.001		0	0	0	0	0	0	0
Tmem131	protein_coding	chr1	complement(36792189..36939637)	147449	7.276	49	56030	transmembrane protein 131	-	GO:0016020 membrane | GO:0016021 integral component of membrane	GO:0003674 molecular_function	-	1.03807	6.31896	6.08722	1	6.31896	6.08722	5.89374	6.74419	1054	1131	1110
Rpl12-ps1	processed_pseudogene	chr1	complement(36957886..36958516)	631	0.631	0	241053	ribosomal protein L12, pseudogene 1	-	-	-	-	1	0.001	0.001		0	0	0	0	0	0	0
Vwa3b	protein_coding	chr1	37026591..37187608	161018	5.54	34	70853	-	GO:0008150 biological_process	GO:0005654 nucleoplasm | GO:0005829 cytosol	GO:0003674 molecular_function	-	1	0.001	0.001		0	0	0	0	0	0	0
LOC105243906	#N/A	chr1	complement(37042567..37046357)	3791	3.791	0	105243906	-	-	-	-	-	1	0.001	0.001		0	0	0	0	0	0	0
LOC105243905	#N/A	chr1	complement(37132273..37150509)	18237	18.237	0	105243905	-	-	-	-	-	-2.66134	0.00952379	0.0253461		0.00952379	0.0253461	0.00207906	0.0169685	11	1	7
Cnga3	protein_coding	chr1	37218278..37263384	45107	3.832	9	12790	cyclic nucleotide gated channel alpha 3	GO:0006811 ion transport | GO:0006812 cation transport | GO:0007601 visual perception | GO:0032026 response to magnesium ion | GO:0034220 ion transmembrane transport | GO:0046549 retinal cone cell development | GO:0050896 response to stimulus | GO:0051591 response to cAMP | GO:0055085 transmembrane transport | GO:0098659 inorganic cation import across plasma membrane	GO:0001750 photoreceptor outer segment | GO:0005737 cytoplasm | GO:0005886 plasma membrane | GO:0016020 membrane | GO:0016021 integral component of membrane | GO:0030425 dendrite | GO:0043025 neuronal cell body | GO:0043194 axon initial segment | GO:0043204 perikaryon | GO:0097386 glial cell projection | GO:1902495 transmembrane transporter complex	GO:0000166 nucleotide binding | GO:0005216 ion channel activity | GO:0005221 intracellular cyclic nucleotide activated cation channel activity | GO:0005222 intracellular cAMP-activated cation channel activity | GO:0005223 intracellular cGMP-activated cation channel activity | GO:0005515 protein binding | GO:0008022 protein C-terminus binding | GO:0030553 cGMP binding	mmu04024 cAMP signaling pathway | mmu04740 Olfactory transduction	5768.25	0.00576825	0.001		0.00576825	0	0	0.0115365	0	0	1
Gm34028	#N/A	chr1	37273436..37275441	2006	2.006	0	102637144	-	-	-	-	-	-20947.9	0.001	0.0209479		0	0.0209479	0	0	1	0	0
Inpp4a	protein_coding	chr1	37299838..37410740	110903	9.529	35	269180	inositol polyphosphate-4-phosphatase, type I	GO:0006798 polyphosphate catabolic process	GO:0005634 nucleus | GO:0005737 cytoplasm | GO:0005768 endosome | GO:0005886 plasma membrane | GO:0014069 postsynaptic density | GO:0016020 membrane | GO:0030054 cell junction | GO:0045202 synapse	GO:0016316 phosphatidylinositol-3,4-bisphosphate 4-phosphatase activity | GO:0016787 hydrolase activity | GO:0034597 phosphatidylinositol-4,5-bisphosphate 4-phosphatase activity	mmu00562 Inositol phosphate metabolism | mmu01100 Metabolic pathways | mmu04070 Phosphatidylinositol signaling system	1.38679	1.98755	1.4332	1	1.98755	1.4332	1.96165	2.01345	325	493	434
4930439A04Rik	lncRNA	chr1	complement(37307036..37335856)	28821	28.821	0	78119	-	-	-	-	-	46.9423	0.136885	0.00291603		0.136885	0.00291603	0.134188	0.139583	2	102	91
Coa5	protein_coding	chr1	complement(37417085..37430103)	13019	3.862	3	76178	cytochrome C oxidase assembly factor 5	GO:0033617 mitochondrial respiratory chain complex IV assembly	GO:0005739 mitochondrion	GO:0003674 molecular_function	-	-1.51425	16.2825	24.6558	1	16.2825	24.6558	16.3563	16.2088	2266	1666	1416
Unc50	protein_coding	chr1	37430144..37439124	8981	1.44	11	67387	unc-50 homolog (C. elegans)	GO:0006810 transport | GO:0007166 cell surface receptor signaling pathway | GO:0015031 protein transport	GO:0000139 Golgi membrane | GO:0005634 nucleus | GO:0005637 nuclear inner membrane | GO:0005794 Golgi apparatus | GO:0016020 membrane | GO:0016021 integral component of membrane | GO:0030173 integral component of Golgi membrane	GO:0003723 RNA binding	-	-1.67906	5.3877	9.04629	1	5.3877	9.04629	6.66161	4.11378	310	253	134
Mgat4a	protein_coding	chr1	complement(37439340..37541047)	101708	7.585	22	269181	mannoside acetylglucosaminyltransferase 4, isoenzyme A	GO:0006487 protein N-linked glycosylation	GO:0005576 extracellular region | GO:0005783 endoplasmic reticulum | GO:0005793 endoplasmic reticulum-Golgi intermediate compartment | GO:0005794 Golgi apparatus | GO:0005795 Golgi stack | GO:0016020 membrane | GO:0016021 integral component of membrane	GO:0008375 acetylglucosaminyltransferase activity | GO:0008454 alpha-1,3-mannosylglycoprotein 4-beta-N-acetylglucosaminyltransferase activity | GO:0016740 transferase activity | GO:0016757 transferase activity, transferring glycosyl groups | GO:0046872 metal ion binding	mmu00510 N-Glycan biosynthesis | mmu01100 Metabolic pathways	-1.44143	5.84976	8.43199	1	5.84976	8.43199	6.02855	5.67096	1522	1206	973
4930594C11Rik	TEC	chr1	complement(37485851..37488605)	2755	2.755	0	77633	RIKEN cDNA 4930594C11 gene	-	-	-	-	1	0.001	0.001		0	0	0	0	0	0	0
LOC105243907	#N/A	chr1	complement(37499037..37499941)	905	0.905	0	105243907	-	-	-	-	-	1	0.001	0.001		0	0	0	0	0	0	0
2010300C02Rik	protein_coding	chr1	complement(37611676..37720092)	108417	5.834	16	72097	RIKEN cDNA 2010300C02 gene	GO:0008150 biological_process	GO:0005575 cellular_component	GO:0003674 molecular_function	-	3.26936	0.0470975	0.0144057		0.0470975	0.0144057	0.0259965	0.0681986	2	4	9
LOC102637491	#N/A	chr1	37614507..37615373	867	0.867	0	102637491	-	-	-	-	-	1	0.001	0.001		0	0	0	0	0	0	0
LOC102637336	#N/A	chr1	37653243..37671961	18719	18.719	0	102637336	-	-	-	-	-	1.7695	0.043695	0.0246934		0.043695	0.0246934	0.0141787	0.0732113	11	7	31
LOC105243908	#N/A	chr1	37684985..37700121	15137	15.137	0	105243908	-	-	-	-	-	7.06377	0.0392191	0.00555215		0.0392191	0.00555215	0.00250485	0.0759334	2	1	26
Tsga10	protein_coding	chr1	complement(37728144..37866739)	138596	7.053	34	211484	testis specific 10	GO:0007283 spermatogenesis | GO:0030031 cell projection assembly	GO:0005737 cytoplasm | GO:0005856 cytoskeleton | GO:0031514 motile cilium | GO:0035686 sperm fibrous sheath | GO:0043005 neuron projection | GO:0097228 sperm principal piece	GO:0005198 structural molecule activity | GO:0005515 protein binding	-	1.83439	0.459026	0.250234		0.459026	0.250234	0.397813	0.52024	42	74	83
Lipt1	protein_coding	chr1	37868507..37876298	7792	5.517	8	623661	lipoyltransferase 1	GO:0006464 cellular protein modification process | GO:0009249 protein lipoylation	GO:0005739 mitochondrion	GO:0016740 transferase activity | GO:0016746 transferase activity, transferring acyl groups	mmu00785 Lipoic acid metabolism | mmu01100 Metabolic pathways	-4.10156	0.0835665	0.342753		0.0835665	0.342753	0.00687256	0.16026	45	1	20
Mitd1	protein_coding	chr1	complement(37878890..37890428)	11539	1.317	9	69028	MIT, microtubule interacting and transport, domain containing 1	GO:0000281 mitotic cytokinesis | GO:0007049 cell cycle | GO:0032091 negative regulation of protein binding | GO:0051301 cell division | GO:0061952 midbody abscission	GO:0005768 endosome | GO:0016020 membrane | GO:0019898 extrinsic component of membrane | GO:0030496 midbody | GO:0043231 intracellular membrane-bounded organelle	GO:0019904 protein domain specific binding | GO:0035091 phosphatidylinositol binding | GO:0042802 identical protein binding	-	1.19639	4.12271	3.44595	1	4.12271	3.44595	3.71386	4.53155	108	129	135
Mrpl30	protein_coding	chr1	37890498..37898338	7841	2.339	9	107734	mitochondrial ribosomal protein L30	GO:0006412 translation | GO:0008150 biological_process	GO:0005739 mitochondrion | GO:0005761 mitochondrial ribosome | GO:0005762 mitochondrial large ribosomal subunit | GO:0005840 ribosome | GO:0015934 large ribosomal subunit	GO:0003674 molecular_function | GO:0003735 structural constituent of ribosome	mmu03010 Ribosome	1.60565	2.25002	1.40131	1	2.25002	1.40131	2.8368	1.66323	78	175	88
Lyg2	protein_coding	chr1	complement(37905583..37916493)	10911	2.797	9	332427	lysozyme G-like 2	GO:0008152 metabolic process | GO:0009253 peptidoglycan catabolic process | GO:0016998 cell wall macromolecule catabolic process | GO:0042742 defense response to bacterium | GO:0050830 defense response to Gram-positive bacterium	GO:0005576 extracellular region	GO:0003796 lysozyme activity | GO:0016787 hydrolase activity | GO:0016798 hydrolase activity, acting on glycosyl bonds	-	11.5487	0.520514	0.0450713		0.520514	0.0450713	0.203339	0.837689	3	15	53
Lyg1	protein_coding	chr1	complement(37946738..37957759)	11022	0.798	8	69541	lysozyme G-like 1	GO:0008152 metabolic process | GO:0009253 peptidoglycan catabolic process | GO:0016998 cell wall macromolecule catabolic process | GO:0050830 defense response to Gram-positive bacterium	GO:0005576 extracellular region	GO:0003796 lysozyme activity | GO:0016787 hydrolase activity | GO:0016798 hydrolase activity, acting on glycosyl bonds	-	1	0.001	0.001		0	0	0	0	0	0	0
Txndc9	protein_coding	chr1	complement(37983867..37997725)	13859	5.329	8	98258	thioredoxin domain containing 9	GO:0045454 cell redox homeostasis	GO:0005634 nucleus | GO:0005737 cytoplasm | GO:0005813 centrosome | GO:0005829 cytosol | GO:0005856 cytoskeleton | GO:0030496 midbody	-	-	-2.32166	3.08738	7.16786	1	3.08738	7.16786	2.53294	3.64182	909	356	439
Eif5b	protein_coding	chr1	37998000..38055579	57580	7.807	27	226982	eukaryotic translation initiation factor 5B	GO:0006446 regulation of translational initiation	GO:0005737 cytoplasm	GO:0000166 nucleotide binding | GO:0003743 translation initiation factor activity | GO:0003924 GTPase activity | GO:0005525 GTP binding | GO:0016787 hydrolase activity | GO:0046872 metal ion binding	mmu03013 RNA transport	-1.1245	5.63864	6.34063	1	5.63864	6.34063	4.9635	6.31379	1178	1022	1115
Gm34448	#N/A	chr1	complement(38023490..38030460)	6971	6.971	0	102637707	-	-	-	-	-	131417	0.131417	0.001		0.131417	0	0.174051	0.0887835	0	32	14
Rev1	protein_coding	chr1	complement(38052786..38129919)	77134	5.315	38	56210	REV1 homolog (S. cerevisiae)	GO:0006281 DNA repair | GO:0006974 cellular response to DNA damage stimulus | GO:0009411 response to UV | GO:0042276 error-prone translesion synthesis | GO:0070987 error-free translesion synthesis | GO:0071897 DNA biosynthetic process	GO:0005634 nucleus	GO:0003677 DNA binding | GO:0003684 damaged DNA binding | GO:0003887 DNA-directed DNA polymerase activity | GO:0005515 protein binding | GO:0016740 transferase activity | GO:0016779 nucleotidyltransferase activity | GO:0017125 deoxycytidyl transferase activity | GO:0046872 metal ion binding	mmu03460 Fanconi anemia pathway	-2.28484	1.50177	3.43129	1	1.50177	3.43129	1.44815	1.55538	434	203	187
LOC105243909	#N/A	chr1	complement(38072033..38073453)	1421	1.421	0	105243909	-	-	-	-	-	1	0.001	0.001		0	0	0	0	0	0	0
Gm5099	lncRNA	chr1	38132083..38159892	27810	27.81	0	329123	-	GO:0008150 biological_process	GO:0005575 cellular_component	GO:0003674 molecular_function	-	17828.3	0.0178283	0.001		0.0178283	0	0.00545356	0.0302031	0	4	19
Aff3	protein_coding	chr1	complement(38175991..38627837)	451847	7.416	27	16764	AF4/FMR2 family, member 3	GO:0006351 transcription, DNA-templated | GO:0006355 regulation of transcription, DNA-templated | GO:0010468 regulation of gene expression | GO:0034612 response to tumor necrosis factor | GO:0035116 embryonic hindlimb morphogenesis	GO:0005634 nucleus | GO:0005654 nucleoplasm | GO:0005829 cytosol | GO:0008023 transcription elongation factor complex | GO:0016604 nuclear body | GO:0032783 ELL-EAF complex	GO:0003677 DNA binding | GO:0003690 double-stranded DNA binding | GO:0003700 DNA-binding transcription factor activity	-	1.64956	0.186939	0.113327		0.186939	0.113327	0.0460144	0.327863	20	9	55
Gm16150	lncRNA	chr1	38226402..38247651	21250	21.25	0	102638318	-	-	-	-	-	7.28934	0.0144145	0.00197748		0.0144145	0.00197748	0.00178428	0.0270448	1	1	13
Gm16152	lncRNA	chr1	38382390..38391530	9141	9.141	0	102638209	-	-	-	-	-	10.146	0.0466413	0.00459703		0.0466413	0.00459703	0.0207395	0.0725432	1	5	15
Gm34727	processed_pseudogene	chr1	38480081..38491823	11743	11.743	0	102638078	-	-	-	-	-	-1.40713	0.0279737	0.0393627		0.0279737	0.0393627	0.0258305	0.0301169	11	8	8
Gm34596	#N/A	chr1	38630667..38653368	22702	22.702	0	102637900	-	-	-	-	-	5.41086	0.020031	0.00370201		0.020031	0.00370201	0.00501047	0.0350516	2	3	18
Lonrf2	protein_coding	chr1	complement(38793669..38836719)	43051	6.916	14	381338	LON peptidase N-terminal domain and ring finger 2	-	-	-	-	2.36707	0.0287645	0.012152		0.0287645	0.012152	0	0.057529	2	0	9
Chst10	protein_coding	chr1	complement(38863867..38898262)	34396	3.335	11	98388	carbohydrate sulfotransferase 10	GO:0005975 carbohydrate metabolic process | GO:0007612 learning | GO:0007616 long-term memory | GO:0016051 carbohydrate biosynthetic process | GO:0030166 proteoglycan biosynthetic process	GO:0005794 Golgi apparatus | GO:0016020 membrane | GO:0016021 integral component of membrane	GO:0008146 sulfotransferase activity | GO:0016232 HNK-1 sulfotransferase activity | GO:0016740 transferase activity	mmu00514 Other types of O-glycan biosynthesis	-1.06413	0.0236815	0.0252003		0.0236815	0.0252003	0.0341072	0.0132557	2	3	1
Gm6621	processed_pseudogene	chr1	38907926..38908745	820	0.82	0	625775	predicted gene 6621	-	-	-	-	80868	0.080868	0.001		0.080868	0	0	0.161736	0	0	3
Nms	protein_coding	chr1	38939149..38950276	11128	1.001	12	433292	neuromedin S	GO:0007218 neuropeptide signaling pathway | GO:0045475 locomotor rhythm	GO:0005576 extracellular region	GO:0001664 G protein-coupled receptor binding	-	1	0.001	0.001		0	0	0	0	0	0	0
Gm35171	#N/A	chr1	38980806..38981810	1005	1.005	0	102638660	-	-	-	-	-	1	0.001	0.001		0	0	0	0	0	0	0
Pdcl3	protein_coding	chr1	38987814..38997236	9423	1.706	6	68833	phosducin-like 3	GO:0001525 angiogenesis | GO:0001938 positive regulation of endothelial cell proliferation | GO:0006457 protein folding | GO:0006915 apoptotic process | GO:0010628 positive regulation of gene expression | GO:0030036 actin cytoskeleton organization | GO:0034605 cellular response to heat | GO:0045766 positive regulation of angiogenesis | GO:0050730 regulation of peptidyl-tyrosine phosphorylation | …	GO:0005654 nucleoplasm | GO:0005737 cytoplasm | GO:0005783 endoplasmic reticulum | GO:0005829 cytosol | GO:0032991 protein-containing complex | GO:0097356 perinucleolar compartment	GO:0043184 vascular endothelial growth factor receptor 2 binding | GO:0044183 protein folding chaperone	-	-3.50544	3.28849	11.5276	1	3.28849	11.5276	3.93383	2.64314	468	177	102
Gm35222	#N/A	chr1	complement(39026007..39027357)	1351	1.351	0	102638728	-	-	-	-	-	1	0.001	0.001		0	0	0	0	0	0	0
Mir6349	miRNA	chr1	complement(39186896..39186992)	97	0.097	0	102466631	microRNA 6349	-	-	-	-	1	0.001	0.001		0	0	0	0	0	0	0
Npas2	protein_coding	chr1	39193956..39363240	169285	4.234	23	18143	neuronal PAS domain protein 2	GO:0006355 regulation of transcription, DNA-templated | GO:0006974 cellular response to DNA damage stimulus | GO:0007623 circadian rhythm | GO:0032922 circadian regulation of gene expression | GO:0042493 response to drug | GO:0042745 circadian sleep/wake cycle | GO:0042752 regulation of circadian rhythm | GO:0045475 locomotor rhythm | GO:0045739 positive regulation of DNA repair | GO:0045893 posi…	GO:0005634 nucleus | GO:0005654 nucleoplasm | GO:0005667 transcription factor complex | GO:0005737 cytoplasm | GO:0005829 cytosol	GO:0003677 DNA binding | GO:0003700 DNA-binding transcription factor activity | GO:0005515 protein binding | GO:0046872 metal ion binding | GO:0046983 protein dimerization activity | GO:0051879 Hsp90 protein binding	mmu04710 Circadian rhythm	3.64467	0.072345	0.0198495		0.072345	0.0198495	0.0089551	0.135735	2	1	13
LOC105243910	#N/A	chr1	complement(39274198..39276960)	2763	2.763	0	105243910	-	-	-	-	-	7999.97	0.00799997	0.001		0.00799997	0	0	0.0159999	0	0	1
Gm17904	#N/A	chr1	complement(39278577..39281028)	2452	2.452	0	100416073	predicted gene, 17904	-	-	-	-	16746.3	0.0167463	0.001		0.0167463	0	0.0154633	0.0180293	0	1	1
Gm3617	processed_pseudogene	chr1	39314864..39315486	623	0.623	0	100041999	predicted gene 3617	-	-	-	-	1	0.001	0.001		0	0	0	0	0	0	0
Gm35366	#N/A	chr1	complement(39362975..39367865)	4891	4.891	0	102638922	-	-	-	-	-	-8591.59	0.001	0.00859159		0	0.00859159	0	0	1	0	0
Rpl31	protein_coding	chr1	39367851..39371911	4061	1.254	7	114641	ribosomal protein L31	GO:0002181 cytoplasmic translation | GO:0006412 translation	GO:0005622 intracellular | GO:0005654 nucleoplasm | GO:0005730 nucleolus | GO:0005840 ribosome | GO:0022625 cytosolic large ribosomal subunit | GO:0042788 polysomal ribosome | GO:0045202 synapse	GO:0003735 structural constituent of ribosome | GO:0005515 protein binding	mmu03010 Ribosome	-1.52286	20.9703	31.935	1	20.9703	31.935	23.0096	18.9311	953	761	537
Tbc1d8	protein_coding	chr1	complement(39371495..39478779)	107285	5.192	27	54610	TBC1 domain family, member 8	GO:0006886 intracellular protein transport | GO:0090630 activation of GTPase activity	-	GO:0005096 GTPase activator activity | GO:0017137 Rab GTPase binding	-	-1.86575	2.8587	5.33362	1	2.8587	5.33362	2.69472	3.02268	659	369	355
Gm35423	#N/A	chr1	39414761..39415584	824	0.824	0	102638998	-	-	-	-	-	80475.4	0.0804754	0.001		0.0804754	0	0	0.160951	0	0	3
LOC105243911	#N/A	chr1	39417161..39425235	8075	8.075	0	105243911	-	-	-	-	-	7.63568	0.198676	0.0260195		0.198676	0.0260195	0.0798229	0.31753	5	17	58
Cnot11	protein_coding	chr1	39535802..39546881	11080	3.17	7	52846	CCR4-NOT transcription complex, subunit 11	GO:0006417 regulation of translation | GO:0008150 biological_process | GO:0031047 gene silencing by RNA	GO:0005634 nucleus | GO:0005737 cytoplasm | GO:0030014 CCR4-NOT complex	GO:0003674 molecular_function	-	1.48444	2.26293	1.52444	1	2.26293	1.52444	2.39217	2.13369	115	200	153
Snord89	snoRNA	chr1	complement(39548747..39548840)	94	0.094	0	100217461	small nucleolar RNA, C/D box 89	GO:0008150 biological_process	GO:0005575 cellular_component	GO:0003674 molecular_function	-	4.93878	37.5329	7.59963	1	37.5329	7.59963	32.2688	42.7969	17	80	91
Gm18446	#N/A	chr1	39550269..39550845	577	0.577	0	100417202	predicted gene, 18446	-	-	-	-	689550	0.68955	0.001		0.68955	0	0	1.3791	0	0	18
Rnf149	protein_coding	chr1	complement(39551294..39577441)	26148	2.763	10	67702	ring finger protein 149	GO:0006511 ubiquitin-dependent protein catabolic process | GO:0031647 regulation of protein stability | GO:0035690 cellular response to drug | GO:0043409 negative regulation of MAPK cascade	GO:0016020 membrane | GO:0016021 integral component of membrane	GO:0005515 protein binding | GO:0016740 transferase activity | GO:0046872 metal ion binding | GO:0061630 ubiquitin protein ligase activity	-	-1.02502	40.1054	41.109	1	40.1054	41.109	41.8269	38.3839	2703	3048	2399
Gm5100	processed_pseudogene	chr1	complement(39597413..39598027)	615	0.615	0	329126	-	-	-	-	-	246607	0.246607	0.001		0.246607	0	0.493215	0	0	8	0
Creg2	protein_coding	chr1	complement(39618406..39651510)	33105	6.127	7	263764	cellular repressor of E1A-stimulated genes 2	GO:0008150 biological_process	GO:0005576 extracellular region | GO:0005615 extracellular space | GO:0005783 endoplasmic reticulum | GO:0005794 Golgi apparatus	GO:0003674 molecular_function | GO:0048037 cofactor binding	-	1.87022	1.37246	0.73385	1	1.37246	0.73385	1.72036	1.02457	107	278	142
D930019O06Rik	lncRNA	chr1	39650506..39658419	7914	7.914	0	425051	-	-	-	-	-	-10.1732	0.0746371	0.759296		0.0746371	0.759296	0.0766558	0.0726184	143	16	13
Rfx8	protein_coding	chr1	complement(39665299..39720999)	55701	2.775	20	619289	regulatory factor X 8	GO:0006357 regulation of transcription by RNA polymerase II | GO:0021914 negative regulation of smoothened signaling pathway involved in ventral spinal cord patterning	GO:0005634 nucleus	GO:0000978 RNA polymerase II cis-regulatory region sequence-specific DNA binding | GO:0003677 DNA binding | GO:0003700 DNA-binding transcription factor activity	-	1	0.001	0.001		0	0	0	0	0	0	0
Gm3646	protein_coding	chr1	complement(39804141..39805332)	1192	0.359	2	100042065	predicted gene 3646	GO:0008150 biological_process	GO:0005575 cellular_component	GO:0003674 molecular_function	-	1	0.001	0.001		0	0	0	0	0	0	0
1700066B17Rik	lncRNA	chr1	complement(39842428..39847330)	4903	4.903	0	73426	RIKEN cDNA 1700066B17 gene	-	-	-	-	75998.5	0.0759985	0.001		0.0759985	0	0.0077332	0.144264	0	1	16
Gm35600	#N/A	chr1	39852437..39864814	12378	12.378	0	102639244	-	-	-	-	-	11.4226	0.038778	0.00339485		0.038778	0.00339485	0.00612634	0.0714297	1	2	20
Map4k4	protein_coding	chr1	39900912..40026310	125399	6.075	39	26921	mitogen-activated protein kinase kinase kinase kinase 4	GO:0006468 protein phosphorylation | GO:0007346 regulation of mitotic cell cycle | GO:0010977 negative regulation of neuron projection development | GO:0016310 phosphorylation | GO:0023014 signal transduction by protein phosphorylation | GO:0030335 positive regulation of cell migration | GO:0031098 stress-activated protein kinase signaling cascade | GO:0032014 positive regulation of ARF protein s…	GO:0005737 cytoplasm | GO:0005925 focal adhesion	GO:0000166 nucleotide binding | GO:0004111 creatine kinase activity | GO:0004672 protein kinase activity | GO:0004674 protein serine/threonine kinase activity | GO:0005515 protein binding | GO:0005524 ATP binding | GO:0008017 microtubule binding | GO:0016301 kinase activity | GO:0016740 transferase activity	mmu04010 MAPK signaling pathway	1.1727	13.4978	11.5101	1	13.4978	11.5101	15.1414	11.8542	1664	2426	1629
Gm16894	lncRNA	chr1	complement(40076212..40085851)	9640	9.64	0	100047133	predicted gene, 16894	-	-	-	-	7.13961	0.0311221	0.00435907		0.0311221	0.00435907	0.0117996	0.0504446	1	3	11
Il1r2	protein_coding	chr1	40081750..40125230	43481	5.457	20	16178	interleukin 1 receptor, type II	GO:0010955 negative regulation of protein processing | GO:0050712 negative regulation of interleukin-1 alpha secretion | GO:1900016 negative regulation of cytokine production involved in inflammatory response | GO:2000660 negative regulation of interleukin-1-mediated signaling pathway	GO:0005576 extracellular region | GO:0005737 cytoplasm | GO:0005886 plasma membrane | GO:0016020 membrane | GO:0016021 integral component of membrane	GO:0004908 interleukin-1 receptor activity | GO:0004910 interleukin-1, type II, blocking receptor activity | GO:0019966 interleukin-1 binding	mmu04010 MAPK signaling pathway | mmu04060 Cytokine-cytokine receptor interaction | mmu04640 Hematopoietic cell lineage | mmu05146 Amoebiasis | mmu05166 HTLV-I infection | mmu05202 Transcriptional misregulation in cancer	-2.01585	0.286497	0.577535		0.286497	0.577535	0.208444	0.364551	75	30	45
Gm35741	#N/A	chr1	40149100..40152599	3500	3.5	0	102639421	-	-	-	-	-	21666.2	0.0216662	0.001		0.0216662	0	0.0433324	0	0	4	0
Il1r1	protein_coding	chr1	40225014..40316201	91188	6.036	22	16177	interleukin 1 receptor, type I	GO:0006954 inflammatory response | GO:0007165 signal transduction | GO:0009314 response to radiation | GO:0010286 heat acclimation | GO:0019221 cytokine-mediated signaling pathway | GO:0032729 positive regulation of interferon-gamma production | GO:0050727 regulation of inflammatory response | GO:0070498 interleukin-1-mediated signaling pathway | GO:0070555 response to interleukin-1 | GO:2000391 …	GO:0005576 extracellular region | GO:0005615 extracellular space | GO:0005634 nucleus | GO:0005886 plasma membrane | GO:0009897 external side of plasma membrane | GO:0009986 cell surface | GO:0014069 postsynaptic density | GO:0016020 membrane | GO:0016021 integral component of membrane | GO:0030424 axon | GO:0032991 protein-containing complex	GO:0002020 protease binding | GO:0004908 interleukin-1 receptor activity | GO:0004909 interleukin-1, type I, activating receptor activity | GO:0005161 platelet-derived growth factor receptor binding | GO:0005515 protein binding | GO:0019966 interleukin-1 binding | GO:0035255 ionotropic glutamate receptor binding	mmu04010 MAPK signaling pathway | mmu04060 Cytokine-cytokine receptor interaction | mmu04064 NF-kappa B signaling pathway | mmu04210 Apoptosis | mmu04380 Osteoclast differentiation | mmu04640 Hematopoietic cell lineage | mmu04750 Inflammatory mediator regulation of TRP channels | mmu05146 Amoebiasis | mmu05166 HTLV-I infection	12.7799	0.0889716	0.00696181		0.0889716	0.00696181	0.119351	0.0585922	1	19	8
Il1rl2	protein_coding	chr1	40324441..40367585	43145	5.25	16	107527	interleukin 1 receptor-like 2	GO:0002376 immune system process | GO:0006954 inflammatory response | GO:0007165 signal transduction | GO:0032755 positive regulation of interleukin-6 production | GO:0045087 innate immune response | GO:0045582 positive regulation of T cell differentiation | GO:0050727 regulation of inflammatory response	GO:0005575 cellular_component | GO:0016020 membrane | GO:0016021 integral component of membrane	GO:0004896 cytokine receptor activity | GO:0004908 interleukin-1 receptor activity | GO:0004909 interleukin-1, type I, activating receptor activity	-	2.41638	2.1275	0.88045	1	2.1275	0.88045	2.31829	1.93672	110	321	230
Gm17970	processed_pseudogene	chr1	40353861..40354607	747	0.747	0	100416211	predicted gene, 17970	-	-	-	-	1	0.001	0.001		0	0	0	0	0	0	0
Il1rl1	protein_coding	chr1	40404864..40465418	60555	7.458	17	17082	interleukin 1 receptor-like 1	GO:0002826 negative regulation of T-helper 1 type immune response | GO:0007165 signal transduction | GO:0008285 negative regulation of cell population proliferation | GO:0032689 negative regulation of interferon-gamma production | GO:0032754 positive regulation of interleukin-5 production | GO:0043032 positive regulation of macrophage activation | GO:0043124 negative regulation of I-kappaB kinase…	GO:0005576 extracellular region | GO:0005615 extracellular space | GO:0005829 cytosol | GO:0005886 plasma membrane | GO:0005925 focal adhesion | GO:0009897 external side of plasma membrane | GO:0009986 cell surface | GO:0016020 membrane | GO:0016021 integral component of membrane | GO:0031012 extracellular matrix	GO:0002113 interleukin-33 binding | GO:0002114 interleukin-33 receptor activity | GO:0004908 interleukin-1 receptor activity | GO:0005515 protein binding	-	-1.4504	0.112657	0.163398		0.112657	0.163398	0.106762	0.118551	29	21	20
Il18r1	protein_coding	chr1	40465552..40500854	35303	5.096	25	16182	interleukin 18 receptor 1	GO:0006954 inflammatory response | GO:0007165 signal transduction | GO:0030101 natural killer cell activation | GO:0032729 positive regulation of interferon-gamma production | GO:0035655 interleukin-18-mediated signaling pathway | GO:0045063 T-helper 1 cell differentiation | GO:0051092 positive regulation of NF-kappaB transcription factor activity | GO:0120163 negative regulation of cold-induced …	GO:0016020 membrane | GO:0016021 integral component of membrane | GO:0045092 interleukin-18 receptor complex	GO:0005515 protein binding | GO:0042007 interleukin-18 binding | GO:0042008 interleukin-18 receptor activity	mmu04060 Cytokine-cytokine receptor interaction | mmu04668 TNF signaling pathway | mmu05321 Inflammatory bowel disease (IBD)	16.5192	1.22595	0.0742137	1	1.22595	0.0742137	0.959802	1.4921	9	129	172
Il18rap	protein_coding	chr1	40515362..40551707	36346	5.103	19	16174	interleukin 18 receptor accessory protein	GO:0006954 inflammatory response | GO:0007165 signal transduction | GO:0008283 cell population proliferation | GO:0032609 interferon-gamma production | GO:0032635 interleukin-6 production | GO:0035655 interleukin-18-mediated signaling pathway | GO:0035744 T-helper 1 cell cytokine production | GO:0042119 neutrophil activation | GO:0045954 positive regulation of natural killer cell mediated cytotox…	GO:0005886 plasma membrane | GO:0016020 membrane | GO:0016021 integral component of membrane | GO:0045092 interleukin-18 receptor complex	GO:0004908 interleukin-1 receptor activity | GO:0042008 interleukin-18 receptor activity	mmu04060 Cytokine-cytokine receptor interaction | mmu05321 Inflammatory bowel disease (IBD)	-2.17024	0.43635	0.946986		0.43635	0.946986	0.326925	0.545776	115	44	63
Gm35801	lncRNA	chr1	complement(40572183..40580519)	8337	8.337	0	102639500	-	-	-	-	-	2651.3	0.0026513	0.001		0.0026513	0	0	0.00530261	0	0	1
Slc9a4	protein_coding	chr1	40579715..40630731	51017	4.334	19	110895	solute carrier family 9 (sodium/hydrogen exchanger), member 4	GO:0001696 gastric acid secretion | GO:0002064 epithelial cell development | GO:0006811 ion transport | GO:0006812 cation transport | GO:0006814 sodium ion transport | GO:0006885 regulation of pH | GO:0051453 regulation of intracellular pH | GO:0055085 transmembrane transport | GO:0071805 potassium ion transmembrane transport | GO:0098719 sodium ion import across plasma membrane	GO:0005886 plasma membrane | GO:0016020 membrane | GO:0016021 integral component of membrane	GO:0015297 antiporter activity | GO:0015299 solute:proton antiporter activity | GO:0015385 sodium:proton antiporter activity | GO:0015386 potassium:proton antiporter activity	mmu04971 Gastric acid secretion	6.01369	0.116615	0.0193915		0.116615	0.0193915	0.131227	0.102002	2	15	10
Gm35854	#N/A	chr1	complement(40680582..40681877)	1296	1.205	2	102639574	-	-	-	-	-	1	0.001	0.001		0	0	0	0	0	0	0
Slc9a2	protein_coding	chr1	40681712..40768885	87174	3.493	12	226999	solute carrier family 9 (sodium/hydrogen exchanger), member 2	GO:0006814 sodium ion transport | GO:0006885 regulation of pH | GO:0008104 protein localization | GO:0051453 regulation of intracellular pH | GO:0071805 potassium ion transmembrane transport | GO:0098719 sodium ion import across plasma membrane	GO:0005886 plasma membrane | GO:0005903 brush border	GO:0015385 sodium:proton antiporter activity | GO:0015386 potassium:proton antiporter activity	-	12656.1	0.0126561	0.001		0.0126561	0	0	0.0253122	0	0	2
LOC102641498	#N/A	chr1	40770324..40785367	15044	15.044	0	102641498	-	-	-	-	-	41998.3	0.0419983	0.001		0.0419983	0	0.060488	0.0235086	0	24	8
Mfsd9	protein_coding	chr1	complement(40772040..40790657)	18618	3.152	6	211798	major facilitator superfamily domain containing 9	GO:0055085 transmembrane transport	GO:0016020 membrane | GO:0016021 integral component of membrane	GO:0005215 transporter activity	-	-2.06475	0.671506	1.3865	1	0.671506	1.3865	0.950303	0.392709	104	79	28
Tmem182	protein_coding	chr1	40805601..40856887	51287	2.716	8	381339	transmembrane protein 182	GO:0008150 biological_process	GO:0005575 cellular_component | GO:0016020 membrane | GO:0016021 integral component of membrane	GO:0003674 molecular_function	-	8138.41	0.00813841	0.001		0.00813841	0	0	0.0162768	0	0	1
Gm5973	processed_pseudogene	chr1	complement(40863539..40864239)	701	0.701	0	546733	predicted gene 5973	-	-	-	-	1	0.001	0.001		0	0	0	0	0	0	0
4930448I06Rik	lncRNA	chr1	complement(41167560..41181252)	13693	13.693	0	74897	RIKEN cDNA 4930448I06 gene	-	-	-	-	4.32237	0.0265292	0.00613766		0.0265292	0.00613766	0.030459	0.0225995	2	11	7
LOC105243912	#N/A	chr1	complement(41495622..41533313)	37692	37.692	0	105243912	-	-	-	-	-	1.57804	0.00879653	0.00557432		0.00879653	0.00557432	0	0.0175931	5	0	15
Gm35935	#N/A	chr1	complement(41570307..41573501)	3195	3.195	0	102639680	-	-	-	-	-	1	0.001	0.001		0	0	0	0	0	0	0
Gm29260	lncRNA	chr1	41743023..41939598	196576	196.576	0	102639765	-	-	-	-	-	4.38119	0.025287	0.00577171		0.025287	0.00577171	0.00964408	0.0409298	27	50	182
LOC105243913	#N/A	chr1	41828998..41834931	5934	5.934	0	105243913	-	-	-	-	-	1	0.001	0.001		0	0	0	0	0	0	0
Gm5267	processed_pseudogene	chr1	42103161..42104549	1389	1.389	0	383634	predicted gene 5267	-	-	-	-	1	0.001	0.001		0	0	0	0	0	0	0
Gm8176	processed_pseudogene	chr1	complement(42179283..42180388)	1106	1.106	0	666582	predicted gene 8176	-	-	-	-	1	0.001	0.001		0	0	0	0	0	0	0
Gm28175	lncRNA	chr1	42257852..42304414	46563	46.563	0	102640173	-	-	-	-	-	27.2799	0.0246191	0.001		0.0246191	0.000902465	0.00651434	0.0427239	1	8	45
Gm36678	#N/A	chr1	complement(42399266..42427644)	28379	28.379	0	102640664	-	-	-	-	-	2.19813	0.0130193	0.0059229		0.0130193	0.0059229	0.00267211	0.0233665	4	2	15
Gm36822	#N/A	chr1	complement(42573783..42582017)	8235	8.235	0	102640854	-	-	-	-	-	9208.47	0.00920847	0.001		0.00920847	0	0.0184169	0	0	4	0
Gm30248	#N/A	chr1	complement(42598931..42641594)	42664	42.664	0	102632081	-	-	-	-	-	1.36959	0.0782397	0.0571265		0.0782397	0.0571265	0.0248839	0.131596	58	28	127
Pantr1	lncRNA	chr1	complement(42648200..42694825)	46626	46.626	0	66297	POU domain, class 3, transcription factor 3 adjacent noncoding transcript 1	GO:0010468 regulation of gene expression	-	-	-	-2.60587	0.016255	0.0423585		0.016255	0.0423585	0.00406596	0.0284441	47	5	30
LOC102640933	#N/A	chr1	42695096..42696565	1470	1.47	0	102640933	-	-	-	-	-	12896.6	0.0128966	0.001		0.0128966	0	0.0257931	0	0	1	0
Pou3f3	protein_coding	chr1	42697146..42700210	3065	3.065	1	18993	POU domain, class 3, transcription factor 3	GO:0000122 negative regulation of transcription by RNA polymerase II | GO:0001822 kidney development | GO:0006355 regulation of transcription, DNA-templated | GO:0006357 regulation of transcription by RNA polymerase II | GO:0007275 multicellular organism development | GO:0007399 nervous system development | GO:0007420 brain development | GO:0007588 excretion | GO:0008284 positive regulation of ce…	GO:0005634 nucleus | GO:0005654 nucleoplasm	GO:0000981 DNA-binding transcription factor activity, RNA polymerase II-specific | GO:0001228 DNA-binding transcription activator activity, RNA polymerase II-specific | GO:0003677 DNA binding | GO:0003700 DNA-binding transcription factor activity | GO:0005515 protein binding | GO:0042803 protein homodimerization activity | GO:0043565 sequence-specific DNA binding | GO:0071837 HMG box domain bindi…	-	1.57804	0.0432703	0.0274202		0.0432703	0.0274202	0	0.0865406	2	0	6
2900092D14Rik	#N/A	chr1	42700336..42703176	2841	2.841	0	73100	RIKEN cDNA 2900092D14 gene	-	-	-	-	1	0.001	0.001		0	0	0	0	0	0	0
Pantr2	lncRNA	chr1	complement(42707061..42713454)	6394	6.394	0	66620	POU domain, class 3, transcription factor 3 adjacent noncoding transcript 2	GO:0010468 regulation of gene expression | GO:0021698 cerebellar cortex structural organization | GO:0035264 multicellular organism growth | GO:0048873 homeostasis of number of cells within a tissue	GO:0005634 nucleus | GO:0005737 cytoplasm	-	-	17284.9	0.0172849	0.001		0.0172849	0	0	0.0345698	0	0	5
Mrps9	protein_coding	chr1	42851233..42905683	54451	2.549	14	69527	mitochondrial ribosomal protein S9	GO:0006412 translation	GO:0005730 nucleolus | GO:0005739 mitochondrion | GO:0005763 mitochondrial small ribosomal subunit | GO:0005840 ribosome | GO:0015935 small ribosomal subunit	GO:0003723 RNA binding | GO:0003735 structural constituent of ribosome	mmu03010 Ribosome	1.03759	2.95919	2.85199	1	2.95919	2.85199	3.00471	2.91366	173	202	168
LOC105243914	#N/A	chr1	complement(42936623..42952661)	16039	16.039	0	105243914	-	-	-	-	-	2.80541	0.0441003	0.0157197		0.0441003	0.0157197	0	0.0882007	6	0	32
Gpr45	protein_coding	chr1	42952872..43035451	82580	6.672	7	93690	G protein-coupled receptor 45	GO:0007165 signal transduction | GO:0007186 G protein-coupled receptor signaling pathway	GO:0005886 plasma membrane | GO:0016020 membrane | GO:0016021 integral component of membrane	GO:0004930 G protein-coupled receptor activity	-	15150.1	0.0151501	0.001		0.0151501	0	0.0170485	0.0132517	0	3	2
Gm3418	#N/A	chr1	complement(42998983..42999477)	495	0.495	0	100041588	predicted gene 3418	-	-	-	-	1	0.001	0.001		0	0	0	0	0	0	0
Tgfbrap1	protein_coding	chr1	complement(43047265..43098622)	51358	6.121	22	73122	transforming growth factor, beta receptor associated protein 1	GO:0006355 regulation of transcription, DNA-templated | GO:0006886 intracellular protein transport | GO:0007165 signal transduction | GO:0008333 endosome to lysosome transport | GO:0015031 protein transport | GO:0016192 vesicle-mediated transport | GO:0034058 endosomal vesicle fusion	GO:0005737 cytoplasm | GO:0005768 endosome | GO:0005769 early endosome | GO:0016020 membrane | GO:0033263 CORVET complex | GO:0043231 intracellular membrane-bounded organelle	GO:0005160 transforming growth factor beta receptor binding | GO:0046332 SMAD binding	-	-1.85113	2.29193	4.24265	1	2.29193	4.24265	2.92995	1.65391	618	473	229
LOC105243915	#N/A	chr1	43056056..43057134	1079	1.079	0	105243915	-	-	-	-	-	1	0.001	0.001		0	0	0	0	0	0	0
AI597479	protein_coding	chr1	43098710..43115946	17237	3.457	4	98404	expressed sequence AI597479	GO:0008150 biological_process | GO:0048598 embryonic morphogenesis	GO:0072669 tRNA-splicing ligase complex	GO:0003674 molecular_function	-	-1.57422	1.26634	1.9935	1	1.26634	1.9935	1.07485	1.45782	164	98	114
Fhl2	protein_coding	chr1	complement(43123071..43198299)	75229	1.702	9	14200	four and a half LIM domains 2	GO:0000122 negative regulation of transcription by RNA polymerase II | GO:0001649 osteoblast differentiation | GO:0006357 regulation of transcription by RNA polymerase II | GO:0009725 response to hormone | GO:0043066 negative regulation of apoptotic process | GO:0045892 negative regulation of transcription, DNA-templated | GO:0055014 atrial cardiac muscle cell development | GO:0055015 ventricular…	GO:0005634 nucleus | GO:0005737 cytoplasm | GO:0030018 Z disc | GO:0031430 M band	GO:0003712 transcription coregulator activity | GO:0005515 protein binding | GO:0008134 transcription factor binding | GO:0042802 identical protein binding | GO:0046872 metal ion binding	mmu04380 Osteoclast differentiation	185612	0.185612	0.001		0.185612	0	0.267327	0.103896	0	12	4
LOC105243916	#N/A	chr1	43132540..43148045	15506	15.506	0	105243916	-	-	-	-	-	58867.5	0.0588675	0.001		0.0588675	0	0.0464596	0.0712754	0	19	25
Gm8210	processed_pseudogene	chr1	43189057..43189765	709	0.709	1	666642	-	-	-	-	mmu03010 Ribosome	84654.2	0.0846542	0.001		0.0846542	0	0.106956	0.0623524	0	2	1
Gm29040	lncRNA	chr1	complement(43246216..43309641)	63426	63.426	0	102632346	-	-	-	-	-	22.5516	0.0298821	0.00132506		0.0298821	0.00132506	0.0346722	0.0250919	2	58	36
Nck2	protein_coding	chr1	43445749..43570518	124770	2.777	7	17974	non-catalytic region of tyrosine kinase adaptor protein 2	GO:0001771 immunological synapse formation | GO:0006417 regulation of translation | GO:0007015 actin filament organization | GO:0016477 cell migration | GO:0030032 lamellipodium assembly | GO:0030838 positive regulation of actin filament polymerization | GO:0033137 negative regulation of peptidyl-serine phosphorylation | GO:0036493 positive regulation of translation in response to endoplasmic ret…	GO:0005737 cytoplasm | GO:0005783 endoplasmic reticulum | GO:0012506 vesicle membrane | GO:0014069 postsynaptic density | GO:0045202 synapse	GO:0001784 phosphotyrosine residue binding | GO:0005070 SH3/SH2 adaptor activity | GO:0044877 protein-containing complex binding | GO:0097110 scaffold protein binding	mmu04012 ErbB signaling pathway | mmu04360 Axon guidance | mmu04660 T cell receptor signaling pathway	3.28736	1.09437	0.332903	1	1.09437	0.332903	1.58381	0.604933	22	116	38
LOC102642726	#N/A	chr1	43680426..43695980	15555	15.555	0	102642726	-	-	-	-	-	9744.87	0.00974487	0.001		0.00974487	0	0.00243754	0.0170522	0	1	6
Gm30634	#N/A	chr1	43714283..43718238	3956	3.956	0	102632604	-	-	-	-	-	-10622.2	0.001	0.0106222		0	0.0106222	0	0	1	0	0
1500015O10Rik	#N/A	chr1	43730602..43742564	11963	0.888	4	78896	RIKEN cDNA 1500015O10 gene	GO:0007218 neuropeptide signaling pathway | GO:0007417 central nervous system development | GO:0008285 negative regulation of cell population proliferation | GO:0009611 response to wounding | GO:0030103 vasopressin secretion | GO:0031145 anaphase-promoting complex-dependent catabolic process | GO:0042127 regulation of cell population proliferation | GO:0051461 positive regulation of corticotropin…	GO:0005576 extracellular region | GO:0005615 extracellular space | GO:0005737 cytoplasm | GO:0005886 plasma membrane | GO:0016020 membrane | GO:0016324 apical plasma membrane | GO:0031045 dense core granule	GO:0005184 neuropeptide hormone activity	-	1	0.001	0.001		0	0	0	0	0	0	0
Gm29155	lncRNA	chr1	complement(43741960..43744501)	2542	2.542	0	102632685	-	-	-	-	-	196348	0.196348	0.001		0.196348	0	0.253568	0.139128	0	17	8
Uxs1	protein_coding	chr1	complement(43748459..43827821)	79363	3.163	18	67883	UDP-glucuronate decarboxylase 1	-	GO:0005737 cytoplasm | GO:0005739 mitochondrion | GO:0005794 Golgi apparatus | GO:0016020 membrane | GO:0016021 integral component of membrane | GO:1902494 catalytic complex	GO:0016829 lyase activity | GO:0016831 carboxy-lyase activity | GO:0042802 identical protein binding | GO:0042803 protein homodimerization activity | GO:0048040 UDP-glucuronate decarboxylase activity | GO:0070403 NAD+ binding	mmu00500 Starch and sucrose metabolism | mmu00520 Amino sugar and nucleotide sugar metabolism | mmu01100 Metabolic pathways	1.08064	1.45002	1.34182	1	1.45002	1.34182	1.47444	1.42561	101	123	102
Gm16103	processed_pseudogene	chr1	43785821..43787504	1684	1.684	0	100126353	predicted gene 16103	-	-	-	-	1	0.001	0.001		0	0	0	0	0	0	0
LOC102632770	#N/A	chr1	43887979..43889727	1749	1.749	0	102632770	-	-	-	-	-	-24.7141	0.012638	0.312338		0.012638	0.312338	0	0.0252761	13	0	1
Gm8241	processed_pseudogene	chr1	43898125..43901965	3841	3.841	0	666690	predicted gene 8241	-	-	-	-	54292.5	0.0542925	0.001		0.0542925	0	0.108585	0	0	11	0
Tpp2	protein_coding	chr1	43933991..44003000	69010	4.693	32	22019	tripeptidyl peptidase II	GO:0006508 proteolysis	GO:0005634 nucleus | GO:0005654 nucleoplasm | GO:0005737 cytoplasm | GO:0005829 cytosol | GO:0016604 nuclear body	GO:0004177 aminopeptidase activity | GO:0004252 serine-type endopeptidase activity | GO:0008233 peptidase activity | GO:0008236 serine-type peptidase activity | GO:0008240 tripeptidyl-peptidase activity | GO:0016787 hydrolase activity | GO:0042277 peptide binding | GO:0042802 identical protein binding	-	-1.87983	6.35893	11.9537	1	6.35893	11.9537	5.84129	6.87656	1335	723	730
Mettl21c	protein_coding	chr1	complement(44009399..44042626)	33228	1.76	9	433294	methyltransferase like 21C	GO:0006479 protein methylation | GO:0007519 skeletal muscle tissue development | GO:0008628 hormone-mediated apoptotic signaling pathway | GO:0010880 regulation of release of sequestered calcium ion into cytosol by sarcoplasmic reticulum | GO:0032259 methylation | GO:0071549 cellular response to dexamethasone stimulus	GO:0005634 nucleus | GO:0032991 protein-containing complex	GO:0008168 methyltransferase activity | GO:0016279 protein-lysine N-methyltransferase activity | GO:0016740 transferase activity | GO:0031072 heat shock protein binding	-	1	0.001	0.001		0	0	0	0	0	0	0
Ccdc168	#N/A	chr1	complement(44055869..44080198)	24330	20.491	5	102636082	-	-	-	-	-	3.60919	0.00740147	0.00205073		0.00740147	0.00205073	0.0148029	0	1	8	0
Tex30	protein_coding	chr1	complement(44086613..44102497)	15885	1.462	13	75623	testis expressed 30	GO:0008150 biological_process	GO:0005634 nucleus	GO:0003674 molecular_function | GO:0016787 hydrolase activity	-	4.86387	0.978597	0.201197		0.978597	0.201197	0.596488	1.36071	7	23	45
Kdelc1	#N/A	chr1	complement(44106546..44118857)	12312	2.455	13	72050	KDEL (Lys-Asp-Glu-Leu) containing 1	GO:0018242 protein O-linked glycosylation via serine	GO:0005654 nucleoplasm | GO:0005783 endoplasmic reticulum | GO:0005788 endoplasmic reticulum lumen | GO:0005829 cytosol | GO:0012505 endomembrane system	GO:0016740 transferase activity | GO:0016757 transferase activity, transferring glycosyl groups | GO:0030158 protein xylosyltransferase activity | GO:0035251 UDP-glucosyltransferase activity | GO:0035252 UDP-xylosyltransferase activity | GO:0046527 glucosyltransferase activity	-	6.93397	0.949493	0.136934		0.949493	0.136934	0.818551	1.08044	8	53	60
Bivm	protein_coding	chr1	44118888..44144771	25884	4.413	21	246229	basic, immunoglobulin-like variable motif containing	GO:0006295 nucleotide-excision repair, DNA incision, 3'-to lesion	GO:0005634 nucleus | GO:0005737 cytoplasm	GO:0003697 single-stranded DNA binding | GO:0004520 endodeoxyribonuclease activity	-	1.25673	0.251303	0.199966		0.251303	0.199966	0.472552	0.0300529	21	55	3
Ercc5	protein_coding	chr1	44147578..44181260	33683	4.176	17	22592	excision repair cross-complementing rodent repair deficiency, complementation group 5	GO:0006281 DNA repair | GO:0006283 transcription-coupled nucleotide-excision repair | GO:0006289 nucleotide-excision repair | GO:0006295 nucleotide-excision repair, DNA incision, 3'-to lesion | GO:0006974 cellular response to DNA damage stimulus | GO:0008340 determination of adult lifespan | GO:0009411 response to UV | GO:0009650 UV protection | GO:0010225 response to UV-C | GO:0035264 multicellu…	GO:0000109 nucleotide-excision repair complex | GO:0005634 nucleus | GO:0005662 DNA replication factor A complex	GO:0000405 bubble DNA binding | GO:0000993 RNA polymerase II complex binding | GO:0003677 DNA binding | GO:0003690 double-stranded DNA binding | GO:0003697 single-stranded DNA binding | GO:0003824 catalytic activity | GO:0004518 nuclease activity | GO:0004519 endonuclease activity | GO:0004520 endodeoxyribonuclease activity | GO:0016787 hydrolase activity | GO:0016788 hydrolase activity, acting o…	mmu03420 Nucleotide excision repair	5.64565	1.07939	0.19119	1	1.07939	0.19119	1.15309	1.00569	19	127	95
Mettl21e	protein_coding	chr1	complement(44204070..44218931)	14862	3.181	5	403183	methyltransferase like 21E	GO:0008150 biological_process | GO:0032259 methylation	GO:0005575 cellular_component	GO:0003674 molecular_function | GO:0008168 methyltransferase activity | GO:0016740 transferase activity	-	1.51598	0.120158	0.0792609		0.120158	0.0792609	0.143034	0.0972822	6	12	7
Gm15833	processed_pseudogene	chr1	44211767..44213429	1663	1.663	0	100534373	predicted gene 15833	-	-	-	-	1	0.001	0.001		0	0	0	0	0	0	0
Gm5700	processed_pseudogene	chr1	complement(44330051..44331038)	988	0.988	0	435619	predicted gene 5700	-	-	-	-	223724	0.223724	0.001		0.223724	0	0	0.447448	0	0	10
LOC105243917	#N/A	chr1	44392830..44393804	975	0.975	0	105243917	-	-	-	-	-	1	0.001	0.001		0	0	0	0	0	0	0
Txn-ps1	processed_pseudogene	chr1	complement(44463868..44464293)	426	0.426	0	22167	thioredoxin, pseudogene 1	-	-	-	-	44502.2	0.0445022	0.001		0.0445022	0	0.0890044	0	0	1	0
LOC105243918	#N/A	chr1	complement(44522564..44551457)	28894	28.894	0	105243918	-	-	-	-	-	4.7874	0.160137	0.0334496		0.160137	0.0334496	0.107604	0.21267	23	82	139
Gulp1	protein_coding	chr1	44551496..44796838	245343	3.267	17	70676	GULP, engulfment adaptor PTB domain containing 1	GO:0006869 lipid transport | GO:0006909 phagocytosis | GO:0006911 phagocytosis, engulfment | GO:0006915 apoptotic process	GO:0005737 cytoplasm	GO:0003674 molecular_function	-	1	0.001	0.001		0	0	0	0	0	0	0
Gm16102	processed_pseudogene	chr1	44643867..44644698	832	0.832	0	100417474	predicted gene 16102	-	-	-	-	1	0.001	0.001		0	0	0	0	0	0	0
4930521E06Rik	lncRNA	chr1	complement(44739675..44744949)	5275	5.275	0	75066	RIKEN cDNA 4930521E06 gene	-	-	-	-	1	0.001	0.001		0	0	0	0	0	0	0
Gm3489	processed_pseudogene	chr1	44810413..44839698	29286	29.286	0	100041738	-	-	-	-	-	3.15609	0.00452856	0.00143487		0.00452856	0.00143487	0	0.00905713	1	0	6
Gm19480	processed_pseudogene	chr1	complement(44873486..44877400)	3915	3.915	0	100502972	-	-	-	-	-	1	0.001	0.001		0	0	0	0	0	0	0
Gm3496	processed_pseudogene	chr1	complement(44924163..44938607)	14445	14.445	0	100041752	-	-	-	-	-	12.8529	0.0373898	0.00290907		0.0373898	0.00290907	0.0288733	0.0459064	1	11	15
Gm5268	processed_pseudogene	chr1	45178067..45179006	940	0.94	0	383640	predicted gene 5268	-	-	-	-	23514.8	0.0235148	0.001		0.0235148	0	0	0.0470296	0	0	1
Col3a1	protein_coding	chr1	45311538..45349706	38169	5.564	51	12825	collagen, type III, alpha 1	GO:0001568 blood vessel development | GO:0007160 cell-matrix adhesion | GO:0007179 transforming growth factor beta receptor signaling pathway | GO:0007229 integrin-mediated signaling pathway | GO:0007507 heart development | GO:0009314 response to radiation | GO:0018149 peptide cross-linking | GO:0021987 cerebral cortex development | GO:0030198 extracellular matrix organization | GO:0030199 collag…	GO:0005576 extracellular region | GO:0005581 collagen trimer | GO:0005586 collagen type III trimer | GO:0005615 extracellular space | GO:0031012 extracellular matrix | GO:0062023 collagen-containing extracellular matrix	GO:0002020 protease binding | GO:0005178 integrin binding | GO:0005201 extracellular matrix structural constituent | GO:0030020 extracellular matrix structural constituent conferring tensile strength | GO:0046332 SMAD binding | GO:0046872 metal ion binding | GO:0048407 platelet-derived growth factor binding	mmu04151 PI3K-Akt signaling pathway | mmu04510 Focal adhesion | mmu04512 ECM-receptor interaction | mmu04611 Platelet activation | mmu04974 Protein digestion and absorption | mmu05146 Amoebiasis	1.65389	0.0249816	0.0151048		0.0249816	0.0151048	0.0340725	0.0158907	2	5	2
LOC105243919	#N/A	chr1	complement(45348811..45353523)	4713	4.713	0	105243919	-	-	-	-	-	1	0.001	0.001		0	0	0	0	0	0	0
Col5a2	protein_coding	chr1	complement(45374331..45503282)	128952	6.615	54	12832	collagen, type V, alpha 2	GO:0001501 skeletal system development | GO:0030198 extracellular matrix organization | GO:0030199 collagen fibril organization | GO:0043588 skin development | GO:0048592 eye morphogenesis | GO:0071230 cellular response to amino acid stimulus | GO:1903225 negative regulation of endodermal cell differentiation	GO:0005576 extracellular region | GO:0005581 collagen trimer | GO:0005588 collagen type V trimer | GO:0005615 extracellular space | GO:0031012 extracellular matrix | GO:0062023 collagen-containing extracellular matrix	GO:0005201 extracellular matrix structural constituent | GO:0030020 extracellular matrix structural constituent conferring tensile strength | GO:0046332 SMAD binding | GO:0046872 metal ion binding	mmu04151 PI3K-Akt signaling pathway | mmu04510 Focal adhesion | mmu04512 ECM-receptor interaction | mmu04611 Platelet activation | mmu04974 Protein digestion and absorption | mmu05146 Amoebiasis	-63.0114	0.00907329	0.571721		0.00907329	0.571721	0.0114636	0.00668297	90	2	1
Gm8296	processed_pseudogene	chr1	complement(45513532..45514055)	524	0.524	0	666799	predicted gene 8296	-	-	-	-	1	0.001	0.001		0	0	0	0	0	0	0
Gm7063	processed_pseudogene	chr1	complement(45519607..45520839)	1233	1.233	0	631429	predicted gene 7063	-	-	-	-	17926.9	0.0179269	0.001		0.0179269	0	0	0.0358539	0	0	1
Gm8304	processed_pseudogene	chr1	45602027..45602789	763	0.763	0	666814	predicted gene 8304	-	-	-	-	1	0.001	0.001		0	0	0	0	0	0	0
LOC105243920	#N/A	chr1	complement(45684793..45734129)	49337	49.337	0	105243920	-	-	-	-	-	1.70126	0.0159391	0.00936896		0.0159391	0.00936896	0.00768508	0.024193	11	10	27
Gm8307	processed_pseudogene	chr1	45768511..45769483	973	0.973	0	666819	predicted gene 8307	-	-	-	-	38968	0.038968	0.001		0.038968	0	0.0779361	0	0	2	0
Wdr75	protein_coding	chr1	45795153..45823619	28467	3.089	23	73674	WD repeat domain 75	GO:0006364 rRNA processing | GO:0042254 ribosome biogenesis | GO:0045943 positive regulation of transcription by RNA polymerase I | GO:2000234 positive regulation of rRNA processing	GO:0005634 nucleus | GO:0005730 nucleolus	-	mmu03008 Ribosome biogenesis in eukaryotes	-2.07756	1.28338	2.6663	1	1.28338	2.6663	1.52204	1.04473	196	124	73
Gm30900	#N/A	chr1	complement(45826151..45830144)	3994	3.994	0	102632958	-	-	-	-	-	-2.37636	0.0221371	0.0526057		0.0221371	0.0526057	0	0.0442742	5	0	4
Gm5526	processed_pseudogene	chr1	complement(45857188..45857741)	554	0.554	0	433297	predicted pseudogene 5526	-	-	-	-	-1.08794	3.97403	4.32351	1	3.97403	4.32351	4.03797	3.91008	57	59	49
Gm18303	processed_pseudogene	chr1	45905623..45906798	1176	1.176	0	100416885	predicted gene, 18303	-	-	-	-	1	0.001	0.001		0	0	0	0	0	0	0
Slc40a1	protein_coding	chr1	complement(45908070..45926535)	18466	3.492	11	53945	solute carrier family 40 (iron-regulated transporter), member 1	GO:0002260 lymphocyte homeostasis | GO:0003158 endothelium development | GO:0006811 ion transport | GO:0006826 iron ion transport | GO:0006879 cellular iron ion homeostasis | GO:0034395 regulation of transcription from RNA polymerase II promoter in response to iron | GO:0034755 iron ion transmembrane transport | GO:0043066 negative regulation of apoptotic process | GO:0045944 positive regulation …	GO:0005654 nucleoplasm | GO:0005829 cytosol | GO:0005886 plasma membrane | GO:0008021 synaptic vesicle | GO:0016020 membrane | GO:0016021 integral component of membrane | GO:0016323 basolateral plasma membrane	GO:0005381 iron ion transmembrane transporter activity | GO:0005515 protein binding | GO:0015093 ferrous iron transmembrane transporter activity | GO:0017046 peptide hormone binding | GO:0042802 identical protein binding	mmu04978 Mineral absorption	-10.6266	2.73251	29.0372	1	2.73251	29.0372	2.31274	3.15228	2413	213	249
Gm9496	processed_pseudogene	chr1	45971182..45976975	5794	5.794	0	670603	predicted gene 9496	-	-	-	-	1.87881	0.0408787	0.0217578		0.0408787	0.0217578	0.013088	0.0686694	3	2	9
Rpl23a-ps1	processed_pseudogene	chr1	45981531..45982067	537	0.537	0	227054	ribosomal protein 23A, pseudogene 1	-	-	-	-	1	0.001	0.001		0	0	0	0	0	0	0
Gm3852	processed_pseudogene	chr1	complement(46010235..46012263)	2029	2.029	0	100042453	predicted gene 3852	-	-	-	-	1	0.001	0.001		0	0	0	0	0	0	0
Gm4776	#N/A	chr1	complement(46020415..46030437)	10023	10.023	0	212225	predicted gene 4776	GO:0006468 protein phosphorylation | GO:0035556 intracellular signal transduction	GO:0005634 nucleus | GO:0005737 cytoplasm	GO:0004674 protein serine/threonine kinase activity	-	40959.4	0.0409594	0.001		0.0409594	0	0.0113487	0.0705702	0	3	16
Gm18849	unprocessed_pseudogene	chr1	46056310..46058986	2677	2.677	0	100417825	predicted gene, 18849	-	-	-	-	1	0.001	0.001		0	0	0	0	0	0	0
Dnah7b	protein_coding	chr1	46065786..46373551	307766	16.829	100	227058	dynein, axonemal, heavy chain 7B	GO:0003341 cilium movement | GO:0007018 microtubule-based movement	GO:0005829 cytosol | GO:0005858 axonemal dynein complex | GO:0030286 dynein complex | GO:0036156 inner dynein arm	GO:0008569 ATP-dependent microtubule motor activity, minus-end-directed | GO:0045505 dynein intermediate chain binding | GO:0051959 dynein light intermediate chain binding	mmu05016 Huntington's disease	-1.02337	0.00243995	0.00249697		0.00243995	0.00249697	0.00225301	0.00262688	1	1	1
Gm31046	#N/A	chr1	complement(46221792..46233437)	11646	11.646	0	102633144	-	-	-	-	-	28199.6	0.0281996	0.001		0.0281996	0	0.0032557	0.0531435	0	1	14
Gm8326	processed_pseudogene	chr1	46414418..46417017	2600	2.6	0	666855	predicted gene 8326	-	-	-	-	7.29325	0.117874	0.0161621		0.117874	0.0161621	0.218746	0.017003	1	15	1
Dnah7c	protein_coding	chr1	46424258..46807715	383458	14.422	68	100101919	-	GO:0003341 cilium movement | GO:0007018 microtubule-based movement	GO:0005829 cytosol | GO:0005858 axonemal dynein complex | GO:0030286 dynein complex | GO:0036156 inner dynein arm	GO:0008569 ATP-dependent microtubule motor activity, minus-end-directed | GO:0045505 dynein intermediate chain binding | GO:0051959 dynein light intermediate chain binding	mmu05016 Huntington's disease	3065.31	0.00306531	0.001		0.00306531	0	0	0.00613061	0	0	2
Slc39a10	protein_coding	chr1	complement(46807544..46925772)	118229	6.309	16	227059	solute carrier family 39 (zinc transporter), member 10	GO:0002903 negative regulation of B cell apoptotic process | GO:0006811 ion transport | GO:0006829 zinc ion transport | GO:0006882 cellular zinc ion homeostasis | GO:0030001 metal ion transport | GO:0030890 positive regulation of B cell proliferation | GO:0050861 positive regulation of B cell receptor signaling pathway | GO:0055085 transmembrane transport | GO:0071578 zinc ion import across plasm…	GO:0005886 plasma membrane | GO:0005887 integral component of plasma membrane | GO:0016020 membrane | GO:0016021 integral component of membrane	GO:0005385 zinc ion transmembrane transporter activity | GO:0046873 metal ion transmembrane transporter activity	-	-1.20021	1.39848	1.67846	1	1.39848	1.67846	1.80895	0.988002	252	301	141
LOC105243921	#N/A	chr1	47251863..47287975	36113	36.113	0	105243921	-	-	-	-	-	-1.50238	0.00542157	0.00814527		0.00542157	0.00814527	0.00104992	0.00979322	7	1	8
Gm4852	processed_pseudogene	chr1	complement(47365002..47366477)	1476	1.476	0	227061	predicted pseudogene 4852	-	-	-	-	1	0.001	0.001		0	0	0	0	0	0	0
LOC105243922	#N/A	chr1	47433524..47461160	27637	27.637	0	105243922	-	-	-	-	-	-13.3038	0.00148576	0.0197662		0.00148576	0.0197662	0.00137193	0.00159959	13	1	1
Mir6350	miRNA	chr1	complement(47467021..47467125)	105	0.105	0	102466969	microRNA 6350	-	-	-	-	1	0.001	0.001		0	0	0	0	0	0	0
Gm18117	processed_pseudogene	chr1	47479511..47480198	688	0.688	0	100416447	predicted gene, 18117	-	-	-	-	1	0.001	0.001		0	0	0	0	0	0	0
Gm8337	processed_pseudogene	chr1	47657627..47659711	2085	2.085	0	666869	predicted gene 8337	-	-	-	-	-5.70326	0.0106014	0.0604625		0.0106014	0.0604625	0	0.0212028	3	0	1
Gm19206	processed_pseudogene	chr1	complement(47915005..47915815)	811	0.811	0	100418427	predicted gene, 19206	-	-	-	-	1	0.001	0.001		0	0	0	0	0	0	0
Gm5974	processed_pseudogene	chr1	complement(48313667..48314869)	1203	1.203	0	546734	predicted gene 5974	-	-	-	-	1	0.001	0.001		0	0	0	0	0	0	0
Gm8354	processed_pseudogene	chr1	complement(48730639..48733097)	2459	2.459	0	666903	predicted gene 8354	-	-	-	-	1.57804	0.026967	0.0170888		0.026967	0.0170888	0	0.0539339	1	0	3
Gm19124	processed_pseudogene	chr1	48783663..48784593	931	0.931	0	100418296	predicted gene, 19124	-	-	-	-	1	0.001	0.001		0	0	0	0	0	0	0
Gm8357	processed_pseudogene	chr1	48881695..48882925	1231	1.231	0	666909	predicted gene 8357	-	-	-	-	1	0.001	0.001		0	0	0	0	0	0	0
Gm19644	#N/A	chr1	complement(49003991..49005182)	1192	1.192	0	100503343	-	-	-	-	-	1	0.001	0.001		0	0	0	0	0	0	0
Gm8367	processed_pseudogene	chr1	49236252..49237008	757	0.757	0	666924	predicted gene 8367	-	-	-	-	1	0.001	0.001		0	0	0	0	0	0	0
C230029F24Rik	lncRNA	chr1	49244616..49340431	95816	95.816	0	442837	-	GO:0008150 biological_process	GO:0005575 cellular_component	GO:0003674 molecular_function	-	2.55565	0.024658	0.00964841		0.024658	0.00964841	0.0225558	0.0267602	22	57	58
Gm6757	processed_pseudogene	chr1	complement(49398784..49400799)	2016	2.016	0	627430	predicted gene 6757	-	-	-	-	1	0.001	0.001		0	0	0	0	0	0	0
Gm3605	processed_pseudogene	chr1	49498553..49498983	431	0.431	0	100041981	-	-	-	-	-	1	0.001	0.001		0	0	0	0	0	0	0
Gm8384	processed_pseudogene	chr1	50056782..50058487	1706	1.706	0	666962	predicted gene 8384	-	-	-	-	1	0.001	0.001		0	0	0	0	0	0	0
Gm8391	processed_pseudogene	chr1	complement(50177569..50178291)	723	0.723	0	666970	predicted gene 8391	-	-	-	-	1	0.001	0.001		0	0	0	0	0	0	0
LOC105243923	#N/A	chr1	complement(50297902..50322048)	24147	24.147	0	105243923	-	-	-	-	-	9.39731	0.0163535	0.00174024		0.0163535	0.00174024	0.0235532	0.0091539	1	15	5
LOC102633655	#N/A	chr1	50533030..50533191	162	0.162	0	102633655	-	-	-	-	-	1	0.001	0.001		0	0	0	0	0	0	0
Gm28321	lncRNA	chr1	50812475..50817701	5227	5.227	0	102633780	-	-	-	-	-	77337.8	0.0773378	0.001		0.0773378	0	0.0362693	0.118406	0	5	14
Tmeff2	protein_coding	chr1	50909962..51187270	277309	6.573	16	56363	transmembrane protein with EGF-like and two follistatin-like domains 2	GO:0007528 neuromuscular junction development | GO:0008045 motor neuron axon guidance | GO:0009887 animal organ morphogenesis | GO:0009888 tissue development | GO:0016358 dendrite development | GO:0030336 negative regulation of cell migration | GO:0043113 receptor clustering | GO:0044319 wound healing, spreading of cells | GO:0045720 negative regulation of integrin biosynthetic process | GO:00514…	GO:0005604 basement membrane | GO:0016020 membrane | GO:0016021 integral component of membrane	-	-	1.72843	0.0331497	0.0191791		0.0331497	0.0191791	0.00576843	0.060531	3	1	9
LOC105243924	#N/A	chr1	complement(51071571..51090893)	19323	19.323	0	105243924	-	-	-	-	-	1143.92	0.00114392	0.001		0.00114392	0	0	0.00228783	0	0	1
9330175M20Rik	lncRNA	chr1	complement(51218386..51333779)	115394	115.394	0	442821	RIKEN cDNA 9330175M20 gene	-	-	-	-	-2.15599	0.0374967	0.0808427		0.0374967	0.0808427	0.0236576	0.0513359	222	72	134
Sdpr	#N/A	chr1	51289126..51302960	13835	3.055	2	20324	serum deprivation response	GO:0045944 positive regulation of transcription by RNA polymerase II | GO:0097320 plasma membrane tubulation	GO:0005654 nucleoplasm | GO:0005737 cytoplasm | GO:0005829 cytosol | GO:0005886 plasma membrane | GO:0005901 caveola | GO:0016020 membrane | GO:0045121 membrane raft	GO:0001786 phosphatidylserine binding | GO:0005080 protein kinase C binding | GO:0005515 protein binding | GO:0008289 lipid binding	-	36176.6	0.0361766	0.001		0.0361766	0	0	0.0723532	0	0	5
Gm5253	processed_pseudogene	chr1	complement(51317531..51318552)	1022	1.022	0	383504	predicted gene 5253	-	-	-	-	1	0.001	0.001		0	0	0	0	0	0	0
Nabp1	protein_coding	chr1	complement(51465297..51478458)	13162	6.687	13	109019	nucleic acid binding protein 1	GO:0000724 double-strand break repair via homologous recombination | GO:0006281 DNA repair | GO:0006974 cellular response to DNA damage stimulus | GO:0007093 mitotic cell cycle checkpoint | GO:0010212 response to ionizing radiation	GO:0000784 nuclear chromosome, telomeric region | GO:0005634 nucleus | GO:0005654 nucleoplasm | GO:0005829 cytosol | GO:0070876 SOSS complex	GO:0003677 DNA binding | GO:0003697 single-stranded DNA binding | GO:0003723 RNA binding	-	1.36962	3.83862	2.80269	1	3.83862	2.80269	4.5304	3.14684	446	799	476
Gm17767	lncRNA	chr1	complement(51582167..51607520)	25354	25.354	0	100045066	-	-	-	-	-	19179.9	0.0191799	0.001		0.0191799	0	0	0.0383597	0	0	22
Gm31636	#N/A	chr1	51622474..51645946	23473	23.473	0	102633934	-	-	-	-	-	8341.04	0.00834104	0.001		0.00834104	0	0.0016153	0.0150668	0	1	8
Myo1b	protein_coding	chr1	complement(51749758..51915978)	166221	6.226	37	17912	myosin IB	GO:0006892 post-Golgi vesicle-mediated transport | GO:0007015 actin filament organization | GO:0030048 actin filament-based movement | GO:0033572 transferrin transport | GO:0051017 actin filament bundle assembly	GO:0005737 cytoplasm | GO:0005769 early endosome | GO:0005884 actin filament | GO:0005886 plasma membrane | GO:0005903 brush border | GO:0010008 endosome membrane | GO:0016459 myosin complex | GO:0030175 filopodium | GO:0032588 trans-Golgi network membrane | GO:0045177 apical part of cell | GO:0048471 perinuclear region of cytoplasm | GO:0071944 cell periphery	GO:0000146 microfilament motor activity | GO:0000166 nucleotide binding | GO:0003774 motor activity | GO:0003779 actin binding | GO:0005516 calmodulin binding | GO:0005524 ATP binding | GO:0005546 phosphatidylinositol-4,5-bisphosphate binding | GO:0005547 phosphatidylinositol-3,4,5-trisphosphate binding | GO:0030898 actin-dependent ATPase activity | GO:0051015 actin filament binding	-	-3.57398	0.156743	0.560196		0.156743	0.560196	0.0791691	0.234317	83	13	33
Gm33795	#N/A	chr1	51915458..51916854	1397	0.94	3	102636835	-	-	-	-	-	23514.8	0.0235148	0.001		0.0235148	0	0	0.0470296	0	0	1
Gm8419	processed_pseudogene	chr1	complement(51938147..51938765)	619	0.619	0	667010	-	-	-	-	-	30626.7	0.0306267	0.001		0.0306267	0	0.0612535	0	0	1	0
Gm8420	processed_pseudogene	chr1	complement(51940674..51941299)	626	0.626	0	667014	predicted gene 8420	-	-	-	-	1	0.001	0.001		0	0	0	0	0	0	0
Stat4	protein_coding	chr1	51987106..52107189	120084	3.208	29	20849	signal transducer and activator of transcription 4	GO:0006355 regulation of transcription, DNA-templated | GO:0006468 protein phosphorylation | GO:0006952 defense response | GO:0007165 signal transduction | GO:0007259 receptor signaling pathway via JAK-STAT | GO:0008283 cell population proliferation | GO:0010628 positive regulation of gene expression | GO:0019221 cytokine-mediated signaling pathway | GO:0042127 regulation of cell population proli…	GO:0005634 nucleus | GO:0005737 cytoplasm | GO:0005829 cytosol	GO:0000978 RNA polymerase II cis-regulatory region sequence-specific DNA binding | GO:0001228 DNA-binding transcription activator activity, RNA polymerase II-specific | GO:0003677 DNA binding | GO:0003700 DNA-binding transcription factor activity | GO:0005515 protein binding | GO:0042802 identical protein binding | GO:0043565 sequence-specific DNA binding	mmu04630 Jak-STAT signaling pathway | mmu05161 Hepatitis B | mmu05321 Inflammatory bowel disease (IBD)	-1.04063	2.17765	2.26612	1	2.17765	2.26612	1.07554	3.27976	173	91	238
Gm3940	processed_pseudogene	chr1	complement(52090584..52091072)	489	0.489	0	100042634	predicted gene 3940	-	-	-	-	116306	0.116306	0.001		0.116306	0	0.232613	0	0	3	0
Gm31812	lncRNA	chr1	complement(52107288..52113890)	6603	6.603	0	102634160	-	-	-	-	-	-2.29843	0.052608	0.120916		0.052608	0.120916	0.0114844	0.0937316	19	2	14
Stat1	protein_coding	chr1	52119438..52161865	42428	5.356	31	20846	signal transducer and activator of transcription 1	GO:0001937 negative regulation of endothelial cell proliferation | GO:0002230 positive regulation of defense response to virus by host | GO:0006351 transcription, DNA-templated | GO:0006355 regulation of transcription, DNA-templated | GO:0006919 activation of cysteine-type endopeptidase activity involved in apoptotic process | GO:0006952 defense response | GO:0007165 signal transduction | GO:0007…	GO:0000790 nuclear chromatin | GO:0005634 nucleus | GO:0005654 nucleoplasm | GO:0005730 nucleolus | GO:0005737 cytoplasm | GO:0005829 cytosol | GO:0030424 axon | GO:0030425 dendrite | GO:0032991 protein-containing complex | GO:0048471 perinuclear region of cytoplasm	GO:0000978 RNA polymerase II cis-regulatory region sequence-specific DNA binding | GO:0000979 RNA polymerase II core promoter sequence-specific DNA binding | GO:0000981 DNA-binding transcription factor activity, RNA polymerase II-specific | GO:0001228 DNA-binding transcription activator activity, RNA polymerase II-specific | GO:0003677 DNA binding | GO:0003690 double-stranded DNA binding | GO:000…	mmu04062 Chemokine signaling pathway | mmu04380 Osteoclast differentiation | mmu04620 Toll-like receptor signaling pathway | mmu04630 Jak-STAT signaling pathway | mmu04917 Prolactin signaling pathway | mmu04919 Thyroid hormone signaling pathway | mmu05140 Leishmaniasis | mmu05145 Toxoplasmosis | mmu05152 Tuberculosis | mmu05160 Hepatitis C | mmu05161 Hepatitis B | mmu05162 Measles | mmu05164 Infl…	1.59422	61.0628	38.3026	1	61.0628	38.3026	62.6646	59.461	4882	8852	7204
Gm18301	unprocessed_pseudogene	chr1	complement(52134443..52135338)	896	0.896	0	100416883	predicted gene, 18301	-	-	-	-	363113	0.363113	0.001		0.363113	0	0.380852	0.345374	0	9	7
Gls	protein_coding	chr1	complement(52163449..52233232)	69784	12.046	24	14660	glutaminase	GO:0001967 suckling behavior | GO:0002087 regulation of respiratory gaseous exchange by nervous system process | GO:0006537 glutamate biosynthetic process | GO:0006541 glutamine metabolic process | GO:0006543 glutamine catabolic process | GO:0007268 chemical synaptic transmission | GO:0051289 protein homotetramerization | GO:0090461 glutamate homeostasis	GO:0005737 cytoplasm | GO:0005739 mitochondrion	GO:0004359 glutaminase activity | GO:0005515 protein binding | GO:0016787 hydrolase activity | GO:0042802 identical protein binding	mmu00220 Arginine biosynthesis | mmu00250 Alanine, aspartate and glutamate metabolism | mmu00471 D-Glutamine and D-glutamate metabolism | mmu01100 Metabolic pathways | mmu04724 Glutamatergic synapse | mmu04727 GABAergic synapse | mmu04964 Proximal tubule bicarbonate reclamation | mmu05206 MicroRNAs in cancer | mmu05230 Central carbon metabolism in cancer	-1.73983	4.98851	8.67918	1	4.98851	8.67918	4.38774	5.58928	2488	1394	1523
Gm31867	#N/A	chr1	complement(52249320..52258151)	8832	8.832	0	102634235	-	-	-	-	-	2502.71	0.00250271	0.001		0.00250271	0	0	0.00500542	0	0	1
Gm5975	processed_pseudogene	chr1	complement(52287721..52289095)	1375	1.375	0	546735	predicted gene 5975	-	-	-	-	1	0.001	0.001		0	0	0	0	0	0	0
Gm31955	#N/A	chr1	52305615..52367667	62053	62.053	0	102634354	-	-	-	-	-	-2.77521	0.0248893	0.0690731		0.0248893	0.0690731	0.0177197	0.0320589	102	29	45
Nab1	protein_coding	chr1	complement(52455849..52500448)	44600	5.092	12	17936	Ngfi-A binding protein 1	GO:0001958 endochondral ossification | GO:0006355 regulation of transcription, DNA-templated | GO:0014037 Schwann cell differentiation | GO:0042552 myelination | GO:0045682 regulation of epidermis development | GO:0045892 negative regulation of transcription, DNA-templated	GO:0005634 nucleus	GO:0008134 transcription factor binding | GO:0140110 transcription regulator activity	-	-1.36247	6.46883	8.81362	1	6.46883	8.81362	6.84303	6.09464	1068	919	702
Gm5976	processed_pseudogene	chr1	complement(52503029..52504246)	1218	1.218	0	546736	predicted gene 5976	-	-	-	-	1	0.001	0.001		0	0	0	0	0	0	0
Gm553	lncRNA	chr1	52504495..52520703	16209	16.209	0	227091	-	GO:0008150 biological_process	GO:0005575 cellular_component	GO:0003674 molecular_function	-	2.39213	0.136434	0.0570345		0.136434	0.0570345	0.212866	0.060002	22	91	22
Rps27a-ps1	processed_pseudogene	chr1	52522221..52522731	511	0.511	0	100042094	ribosomal protein S27A, pseudogene 1	-	-	-	-	1	0.001	0.001		0	0	0	0	0	0	0
Tmem194b	#N/A	chr1	52568535..52651919	83385	3.646	12	227094	transmembrane protein 194B	GO:0008150 biological_process	GO:0005634 nucleus | GO:0005635 nuclear envelope | GO:0016020 membrane | GO:0016021 integral component of membrane	GO:0003674 molecular_function	-	-1.07206	0.182761	0.195931		0.182761	0.195931	0.0623959	0.303126	17	6	25
Gm28178	lncRNA	chr1	complement(52570047..52580292)	10246	10.246	0	102634661	-	-	-	-	-	16951.5	0.0169515	0.001		0.0169515	0	0.00370056	0.0302025	0	1	7
Gm5527	processed_pseudogene	chr1	52584441..52585159	719	0.719	0	433305	-	-	-	-	-	1	0.001	0.001		0	0	0	0	0	0	0
Mfsd6	protein_coding	chr1	complement(52656299..52727462)	71164	6.019	13	98682	major facilitator superfamily domain containing 6	GO:0002250 adaptive immune response | GO:0002376 immune system process | GO:0042590 antigen processing and presentation of exogenous peptide antigen via MHC class I	GO:0005886 plasma membrane | GO:0016020 membrane | GO:0016021 integral component of membrane	GO:0032393 MHC class I receptor activity | GO:0042288 MHC class I protein binding	-	-1.63773	2.36165	3.86773	1	2.36165	3.86773	2.74022	1.98307	554	435	270
Gm28650	processed_pseudogene	chr1	52756719..52757251	533	0.533	0	102636958	-	-	-	-	-	1	0.001	0.001		0	0	0	0	0	0	0
Inpp1	protein_coding	chr1	complement(52785425..52817688)	32264	5.977	9	16329	inositol polyphosphate-1-phosphatase	GO:0046854 phosphatidylinositol phosphorylation | GO:0046855 inositol phosphate dephosphorylation	-	GO:0004441 inositol-1,4-bisphosphate 1-phosphatase activity | GO:0016787 hydrolase activity | GO:0046872 metal ion binding	mmu00562 Inositol phosphate metabolism | mmu01100 Metabolic pathways | mmu04070 Phosphatidylinositol signaling system	2.21887	0.779992	0.351526		0.779992	0.351526	0.672425	0.887559	50	106	120
Hibch	protein_coding	chr1	52845046..52920860	75815	1.704	14	227095	3-hydroxyisobutyryl-Coenzyme A hydrolase	GO:0009083 branched-chain amino acid catabolic process	GO:0005739 mitochondrion	GO:0003860 3-hydroxyisobutyryl-CoA hydrolase activity | GO:0016787 hydrolase activity	mmu00280 Valine, leucine and isoleucine degradation | mmu00410 beta-Alanine metabolism | mmu00640 Propanoate metabolism | mmu01100 Metabolic pathways | mmu01200 Carbon metabolism	-6.44258	0.413395	2.66333	1	0.413395	2.66333	0.489524	0.337266	108	22	13
Gm16107	processed_pseudogene	chr1	complement(52873143..52874165)	1023	1.023	0	100418317	predicted gene 16107	-	-	-	-	1	0.001	0.001		0	0	0	0	0	0	0
1700019D03Rik	protein_coding	chr1	complement(52922324..52991343)	69020	4.248	8	67080	RIKEN cDNA 1700019D03 gene	GO:0008150 biological_process	GO:0005886 plasma membrane | GO:0016020 membrane	GO:0003674 molecular_function | GO:0034237 protein kinase A regulatory subunit binding	-	5.63839	0.0557752	0.00989206		0.0557752	0.00989206	0.0803303	0.0312202	1	9	3
Mstn	protein_coding	chr1	53061663..53068079	6417	2.682	3	17700	myostatin	GO:0007179 transforming growth factor beta receptor signaling pathway | GO:0010592 positive regulation of lamellipodium assembly | GO:0010759 positive regulation of macrophage chemotaxis | GO:0010862 positive regulation of pathway-restricted SMAD protein phosphorylation | GO:0014741 negative regulation of muscle hypertrophy | GO:0014839 myoblast migration involved in skeletal muscle regeneration …	GO:0005576 extracellular region | GO:0005615 extracellular space | GO:0005737 cytoplasm	GO:0005102 signaling receptor binding | GO:0005125 cytokine activity | GO:0005515 protein binding | GO:0008083 growth factor activity | GO:0008201 heparin binding | GO:0042802 identical protein binding | GO:0042803 protein homodimerization activity	-	1.87946	0.0294473	0.015668		0.0294473	0.015668	0.0424115	0.0164832	1	3	1
1700019A02Rik	protein_coding	chr1	complement(53158576..53188650)	30075	1.91	16	69397	RIKEN cDNA 1700019A02 gene	GO:0008150 biological_process	GO:0005575 cellular_component	GO:0003674 molecular_function	-	-3.80217	0.0115727	0.0440015		0.0115727	0.0440015	0	0.0231455	2	0	1
Pms1	protein_coding	chr1	complement(53189187..53297026)	107840	3.34	18	227099	postmeiotic segregation increased 1 (S. cerevisiae)	GO:0006298 mismatch repair	GO:0005634 nucleus | GO:0032300 mismatch repair complex | GO:0032389 MutLalpha complex	GO:0016887 ATPase activity | GO:0019899 enzyme binding	-	-1.74661	0.280927	0.49067		0.280927	0.49067	0.44273	0.119123	39	39	9
LOC105243925	#N/A	chr1	53195073..53198492	3420	3.42	0	105243925	-	-	-	-	-	5543.26	0.00554326	0.001		0.00554326	0	0.0110865	0	0	1	0
Ormdl1	protein_coding	chr1	53297095..53310245	13151	1.846	4	227102	ORM1-like 1 (S. cerevisiae)	GO:0006672 ceramide metabolic process | GO:0090155 negative regulation of sphingolipid biosynthetic process | GO:0090156 cellular sphingolipid homeostasis | GO:1900060 negative regulation of ceramide biosynthetic process	GO:0005783 endoplasmic reticulum | GO:0005789 endoplasmic reticulum membrane | GO:0016020 membrane | GO:0016021 integral component of membrane | GO:0035339 SPOTS complex	GO:0003674 molecular_function	-	-1.64601	3.0425	5.00798	1	3.0425	5.00798	3.59441	2.49058	220	175	104
Osgepl1	protein_coding	chr1	53312897..53326343	13447	2.134	12	72085	O-sialoglycoprotein endopeptidase-like 1	GO:0002949 tRNA threonylcarbamoyladenosine modification | GO:0008033 tRNA processing	GO:0000408 EKC/KEOPS complex | GO:0005739 mitochondrion	GO:0004222 metalloendopeptidase activity | GO:0016740 transferase activity | GO:0016746 transferase activity, transferring acyl groups | GO:0046872 metal ion binding | GO:0061711 N(6)-L-threonylcarbamoyladenine synthase activity	-	-10.0096	0.149511	1.49655	1	0.149511	1.49655	0.195443	0.10358	76	11	5
Gm18800	transcribed_unprocessed_pseudogene	chr1	complement(53326221..53332724)	6504	6.504	0	100417745	predicted gene, 18800	-	-	-	-	-1.52087	0.0169926	0.0258435		0.0169926	0.0258435	0	0.0339851	4	0	5
Asnsd1	protein_coding	chr1	complement(53344617..53352752)	8136	2.442	7	70396	asparagine synthetase domain containing 1	-	-	-	-	-1.28445	4.28704	5.5065	1	4.28704	5.5065	5.71378	2.86029	320	368	158
Gm6801	unprocessed_pseudogene	chr1	53390415..53392585	2171	2.171	0	627866	predicted gene 6801	-	-	-	-	10181.4	0.0101814	0.001		0.0101814	0	0	0.0203629	0	0	1
Dnah7a	protein_coding	chr1	complement(53396494..53708118)	311625	14.18	74	627872	dynein, axonemal, heavy chain 7A	GO:0003341 cilium movement | GO:0007018 microtubule-based movement	GO:0005829 cytosol | GO:0005858 axonemal dynein complex | GO:0005929 cilium | GO:0030286 dynein complex | GO:0036156 inner dynein arm	GO:0008569 ATP-dependent microtubule motor activity, minus-end-directed | GO:0045505 dynein intermediate chain binding | GO:0051959 dynein light intermediate chain binding	mmu05016 Huntington's disease	14029.3	0.0140293	0.001		0.0140293	0	0	0.0280586	0	0	9
Gm32311	#N/A	chr1	53704477..53760971	56495	56.495	0	102634815	-	-	-	-	-	-1.93183	0.0820109	0.158431		0.0820109	0.158431	0.048993	0.115029	213	73	147
Stk17b	protein_coding	chr1	complement(53755512..53785250)	29739	3.313	9	98267	serine/threonine kinase 17b (apoptosis-inducing)	GO:0006468 protein phosphorylation | GO:0006915 apoptotic process | GO:0012501 programmed cell death | GO:0016310 phosphorylation | GO:0035556 intracellular signal transduction | GO:0046777 protein autophosphorylation | GO:2000271 positive regulation of fibroblast apoptotic process	GO:0005634 nucleus | GO:0005886 plasma membrane | GO:0015629 actin cytoskeleton | GO:0016020 membrane	GO:0000166 nucleotide binding | GO:0004672 protein kinase activity | GO:0004674 protein serine/threonine kinase activity | GO:0005524 ATP binding | GO:0016301 kinase activity | GO:0016740 transferase activity	-	-1.41321	10.4022	14.7005	1	10.4022	14.7005	8.67499	12.1295	1159	758	909
Hecw2	protein_coding	chr1	complement(53806872..54195034)	388163	12.947	36	329152	HECT, C2 and WW domain containing E3 ubiquitin protein ligase 2	GO:0000209 protein polyubiquitination | GO:0006511 ubiquitin-dependent protein catabolic process | GO:0016567 protein ubiquitination | GO:0030071 regulation of mitotic metaphase/anaphase transition | GO:0043161 proteasome-mediated ubiquitin-dependent protein catabolic process | GO:0045732 positive regulation of protein catabolic process | GO:0048814 regulation of dendrite morphogenesis | GO:20006…	GO:0005737 cytoplasm | GO:0005856 cytoskeleton | GO:0072686 mitotic spindle	GO:0004842 ubiquitin-protein transferase activity | GO:0016740 transferase activity | GO:0061630 ubiquitin protein ligase activity	-	7807.34	0.00780734	0.001		0.00780734	0	0.00878564	0.00682905	0	3	2
Mir7681	miRNA	chr1	53849424..53849495	72	0.072	0	102465783	microRNA 7681	-	-	-	-	1	0.001	0.001		0	0	0	0	0	0	0
Ccdc150	protein_coding	chr1	54250661..54368727	118067	5.038	40	78016	coiled-coil domain containing 150	GO:0008150 biological_process	GO:0005575 cellular_component	GO:0003674 molecular_function	-	1	0.001	0.001		0	0	0	0	0	0	0
Gtf3c3	protein_coding	chr1	complement(54397581..54438971)	41391	3.005	18	98488	general transcription factor IIIC, polypeptide 3	GO:0006383 transcription by RNA polymerase III	GO:0000127 transcription factor TFIIIC complex | GO:0005654 nucleoplasm | GO:0005730 nucleolus | GO:0031965 nuclear membrane	-	-	-1.36133	1.83873	2.50311	1	1.83873	2.50311	2.75064	0.92682	179	218	63
Gm34066	protein_coding	chr1	complement(54442697..54456948)	14252	1.717	7	102637189	-	-	-	-	-	1	0.001	0.001		0	0	0	0	0	0	0
Pgap1	protein_coding	chr1	complement(54473000..54557684)	84685	10.579	27	241062	post-GPI attachment to proteins 1	GO:0006505 GPI anchor metabolic process | GO:0006506 GPI anchor biosynthetic process | GO:0006888 endoplasmic reticulum to Golgi vesicle-mediated transport | GO:0007605 sensory perception of sound | GO:0009880 embryonic pattern specification | GO:0009948 anterior/posterior axis specification | GO:0015031 protein transport | GO:0015798 myo-inositol transport | GO:0021871 forebrain regionalization …	GO:0005783 endoplasmic reticulum | GO:0016020 membrane | GO:0016021 integral component of membrane	GO:0004518 nuclease activity | GO:0016787 hydrolase activity | GO:0016788 hydrolase activity, acting on ester bonds | GO:0042578 phosphoric ester hydrolase activity | GO:0050185 phosphatidylinositol deacylase activity	mmu00563 Glycosylphosphatidylinositol(GPI)-anchor biosynthesis | mmu01100 Metabolic pathways	1.77234	3.97056	2.2403	1	3.97056	2.2403	3.13965	4.80147	564	876	1149
Gm19637	processed_pseudogene	chr1	54566412..54567318	907	0.907	0	100503327	-	-	-	-	-	250822	0.250822	0.001		0.250822	0	0.501644	0	0	12	0
Ankrd44	protein_coding	chr1	complement(54645340..54926733)	281394	8.153	35	329154	ankyrin repeat domain 44	GO:0008150 biological_process	GO:0005575 cellular_component	GO:0003674 molecular_function	-	-1.40323	5.42506	7.61262	1	5.42506	7.61262	5.22721	5.6229	1477	1124	1037
4930444A19Rik	lncRNA	chr1	54681198..54766343	85146	85.146	0	73980	-	-	-	-	-	-1.23888	0.16771	0.207773		0.16771	0.207773	0.14695	0.18847	421	330	363
Sf3b1	protein_coding	chr1	complement(54985169..55027500)	42332	7.417	27	81898	splicing factor 3b, subunit 1	GO:0000245 spliceosomal complex assembly | GO:0000398 mRNA splicing, via spliceosome | GO:0001825 blastocyst formation | GO:0006397 mRNA processing | GO:0008380 RNA splicing | GO:0009952 anterior/posterior pattern specification	GO:0000785 chromatin | GO:0005634 nucleus | GO:0005681 spliceosomal complex | GO:0005686 U2 snRNP | GO:0005689 U12-type spliceosomal complex | GO:0016363 nuclear matrix | GO:0016607 nuclear speck | GO:0030532 small nuclear ribonucleoprotein complex | GO:0034693 U11/U12 snRNP | GO:0071004 U2-type prespliceosome | GO:0071005 U2-type precatalytic spliceosome | GO:0071013 catalytic step 2 spliceosome	GO:0003682 chromatin binding | GO:0003723 RNA binding | GO:0003729 mRNA binding | GO:0005515 protein binding | GO:1990935 splicing factor binding	mmu03040 Spliceosome	-1.54189	14.3339	22.1014	1	14.3339	22.1014	14.1961	14.4717	3901	2777	2428
Coq10b	protein_coding	chr1	55052770..55072702	19933	1.733	5	67876	coenzyme Q10 homolog B (S. cerevisiae)	GO:0006744 ubiquinone biosynthetic process | GO:0045333 cellular respiration	GO:0005739 mitochondrion | GO:0005743 mitochondrial inner membrane | GO:0016020 membrane	GO:0048039 ubiquinone binding	-	-2.42461	3.12022	7.56532	1	3.12022	7.56532	2.51606	3.72438	312	115	146
Gm17971	processed_pseudogene	chr1	55066253..55067108	856	0.856	0	100416214	predicted gene, 17971	-	-	-	-	1	0.001	0.001		0	0	0	0	0	0	0
Hspd1	protein_coding	chr1	complement(55077834..55088112)	10279	2.456	13	15510	heat shock protein 1 (chaperonin)	GO:0002368 B cell cytokine production | GO:0002755 MyD88-dependent toll-like receptor signaling pathway | GO:0002842 positive regulation of T cell mediated immune response to tumor cell | GO:0006457 protein folding | GO:0006458 'de novo' protein folding | GO:0006919 activation of cysteine-type endopeptidase activity involved in apoptotic process | GO:0006986 response to unfolded protein | GO:0008…	GO:0005615 extracellular space | GO:0005737 cytoplasm | GO:0005739 mitochondrion | GO:0005743 mitochondrial inner membrane | GO:0005759 mitochondrial matrix | GO:0005769 early endosome | GO:0005782 peroxisomal matrix | GO:0005791 rough endoplasmic reticulum | GO:0005794 Golgi apparatus | GO:0005829 cytosol | GO:0005886 plasma membrane | GO:0005905 clathrin-coated pit | GO:0009986 cell surface | G…	GO:0000166 nucleotide binding | GO:0001530 lipopolysaccharide binding | GO:0002020 protease binding | GO:0002039 p53 binding | GO:0003725 double-stranded RNA binding | GO:0005524 ATP binding | GO:0008035 high-density lipoprotein particle binding | GO:0016853 isomerase activity | GO:0019899 enzyme binding | GO:0031625 ubiquitin protein ligase binding | GO:0034185 apolipoprotein binding | GO:003418…	mmu03018 RNA degradation | mmu04940 Type I diabetes mellitus | mmu05134 Legionellosis | mmu05152 Tuberculosis	-2.37054	6.56807	15.5698	1	6.56807	15.5698	6.31417	6.82197	910	409	379
Hspe1	protein_coding	chr1	55088148..55091317	3170	0.768	4	15528	heat shock protein 1 (chaperonin 10)	GO:0006457 protein folding | GO:0051085 chaperone cofactor-dependent protein refolding	GO:0005737 cytoplasm | GO:0005739 mitochondrion | GO:0005759 mitochondrial matrix	GO:0005524 ATP binding | GO:0046872 metal ion binding | GO:0051082 unfolded protein binding | GO:0051087 chaperone binding	-	-2.07697	14.4365	29.9841	1	14.4365	29.9841	15.4033	13.4696	548	312	234
Gm5147	processed_pseudogene	chr1	complement(55120056..55120892)	837	0.837	0	381258	predicted gene 5147	-	-	-	-	1	0.001	0.001		0	0	0	0	0	0	0
Gm16581	processed_pseudogene	chr1	55127293..55128291	999	0.999	0	100417585	predicted gene 16581	-	-	-	-	-42063.5	0.001	0.0420635		0	0.0420635	0	0	1	0	0
Mob4	protein_coding	chr1	55130936..55154899	23964	3.135	10	19070	MOB family member 4, phocein	-	GO:0005737 cytoplasm | GO:0005794 Golgi apparatus | GO:0005829 cytosol | GO:0016020 membrane | GO:0043025 neuronal cell body | GO:0043197 dendritic spine | GO:0048471 perinuclear region of cytoplasm	GO:0019900 kinase binding | GO:0046872 metal ion binding	-	-3.31785	3.72888	12.3719	1	3.72888	12.3719	3.49528	3.96249	923	289	281
Gm6822	processed_pseudogene	chr1	complement(55160643..55161096)	454	0.454	0	627998	predicted pseudogene 6822	-	-	-	-	1	0.001	0.001		0	0	0	0	0	0	0
Rftn2	protein_coding	chr1	complement(55170159..55227065)	56907	4.3	15	74013	raftlin family member 2	GO:0033227 dsRNA transport | GO:0043330 response to exogenous dsRNA	GO:0005886 plasma membrane | GO:0016020 membrane	GO:0003674 molecular_function	-	-7.48495	0.0352515	0.263856		0.0352515	0.263856	0.00881765	0.0616853	27	1	6
Gm32792	#N/A	chr1	55201429..55211142	9714	9.714	0	102635460	-	-	-	-	-	-56236.3	0.001	0.0562363		0	0.0562363	0	0	13	0	0
Gm10561	lncRNA	chr1	55226661..55235534	8874	8.874	0	628004	-	-	-	-	-	5.74873	0.0544445	0.00947069		0.0544445	0.00947069	0.00427269	0.104616	2	1	21
Mars2	protein_coding	chr1	55237177..55240058	2882	2.882	1	212679	methionine-tRNA synthetase 2 (mitochondrial)	GO:0006412 translation | GO:0006418 tRNA aminoacylation for protein translation | GO:0006431 methionyl-tRNA aminoacylation	GO:0005739 mitochondrion | GO:0005759 mitochondrial matrix	GO:0000166 nucleotide binding | GO:0004812 aminoacyl-tRNA ligase activity | GO:0004825 methionine-tRNA ligase activity | GO:0005524 ATP binding | GO:0016874 ligase activity	mmu00450 Selenocompound metabolism | mmu00970 Aminoacyl-tRNA biosynthesis	-2.72201	0.47138	1.2831	1	0.47138	1.2831	0.789366	0.153393	88	60	10
Boll	protein_coding	chr1	complement(55239385..55364058)	124674	13.121	18	75388	bol, boule-like (Drosophila)	GO:0006417 regulation of translation | GO:0007275 multicellular organism development | GO:0007281 germ cell development | GO:0007283 spermatogenesis | GO:0030154 cell differentiation | GO:0045948 positive regulation of translational initiation | GO:0051321 meiotic cell cycle | GO:0070935 3'-UTR-mediated mRNA stabilization	GO:0005737 cytoplasm	GO:0003676 nucleic acid binding | GO:0003723 RNA binding | GO:0003729 mRNA binding | GO:0003730 mRNA 3'-UTR binding | GO:0008494 translation activator activity	-	2.27173	0.0654792	0.0288235		0.0654792	0.0288235	0.0635736	0.0673848	9	22	20
Gm8292	processed_pseudogene	chr1	55335372..55335822	451	0.451	0	666793	-	-	-	-	-	217152	0.217152	0.001		0.217152	0	0.336283	0.0980218	0	4	1
Gm29138	processed_pseudogene	chr1	complement(55370013..55370325)	313	0.313	0	101055993	-	-	-	-	-	1	0.001	0.001		0	0	0	0	0	0	0
Gm8531	processed_pseudogene	chr1	complement(55381179..55395909)	14731	14.731	0	667237	-	-	-	-	-	-4.27745	0.00600201	0.0256733		0.00600201	0.0256733	0	0.012004	9	0	4
Plcl1	protein_coding	chr1	55405946..55754285	348340	6.555	6	227120	phospholipase C-like 1	GO:0006629 lipid metabolic process | GO:0007165 signal transduction | GO:0007214 gamma-aminobutyric acid signaling pathway | GO:0032228 regulation of synaptic transmission, GABAergic | GO:0032959 inositol trisphosphate biosynthetic process | GO:0033135 regulation of peptidyl-serine phosphorylation | GO:0035556 intracellular signal transduction | GO:0048015 phosphatidylinositol-mediated signaling …	GO:0005737 cytoplasm | GO:0005886 plasma membrane	GO:0004435 phosphatidylinositol phospholipase C activity | GO:0008081 phosphoric diester hydrolase activity | GO:0050811 GABA receptor binding	mmu04727 GABAergic synapse	-8.36478	0.0168603	0.141033		0.0168603	0.141033	0	0.0337207	22	0	5
Gm6644	processed_pseudogene	chr1	complement(55443695..55445063)	1369	1.369	0	626009	predicted gene 6644	-	-	-	-	-3.27841	0.327697	1.07433	1	0.327697	1.07433	0.526225	0.129168	35	19	4
LOC105243926	#N/A	chr1	complement(55502042..55509448)	7407	7.407	0	105243926	-	-	-	-	-	17905.2	0.0179052	0.001		0.0179052	0	0	0.0358103	0	0	6
Gm32949	#N/A	chr1	55888254..55916852	28599	28.599	0	102635670	-	-	-	-	-	1.64108	0.0144678	0.008816		0.0144678	0.008816	0.011932	0.0170036	6	9	11
9130227L01Rik	lncRNA	chr1	55931241..55972098	40858	40.858	0	329159	RIKEN cDNA 9130227L01 gene	-	-	-	-	-1.58375	0.00649393	0.0102848		0.00649393	0.0102848	0.00649594	0.00649192	10	7	6
1700003I22Rik	lncRNA	chr1	56018978..56020203	1226	1.226	0	69356	RIKEN cDNA 1700003I22 gene	-	-	-	-	1	0.001	0.001		0	0	0	0	0	0	0
Hsfy2	protein_coding	chr1	complement(56636044..56637451)	1408	1.408	1	71066	heat shock transcription factor, Y linked 2	GO:0034605 cellular response to heat | GO:0043618 regulation of transcription from RNA polymerase II promoter in response to stress | GO:0061408 positive regulation of transcription from RNA polymerase II promoter in response to heat stress	GO:0005634 nucleus	GO:0000978 RNA polymerase II cis-regulatory region sequence-specific DNA binding | GO:0003700 DNA-binding transcription factor activity | GO:0043565 sequence-specific DNA binding	-	1	0.001	0.001		0	0	0	0	0	0	0
Satb2	protein_coding	chr1	complement(56793981..56978681)	184701	6.482	16	212712	special AT-rich sequence binding protein 2	GO:0000122 negative regulation of transcription by RNA polymerase II | GO:0001764 neuron migration | GO:0002076 osteoblast development | GO:0006325 chromatin organization | GO:0006338 chromatin remodeling | GO:0006357 regulation of transcription by RNA polymerase II | GO:0007275 multicellular organism development | GO:0009880 embryonic pattern specification | GO:0010468 regulation of gene express…	GO:0000118 histone deacetylase complex | GO:0000790 nuclear chromatin | GO:0005634 nucleus | GO:0005654 nucleoplasm | GO:0005667 transcription factor complex	GO:0000977 RNA polymerase II regulatory region sequence-specific DNA binding | GO:0000978 RNA polymerase II cis-regulatory region sequence-specific DNA binding | GO:0003677 DNA binding | GO:0003682 chromatin binding | GO:0005515 protein binding | GO:0043565 sequence-specific DNA binding	-	-4.3669	0.15736	0.687176		0.15736	0.687176	0.0350965	0.279624	106	6	41
9130024F11Rik	lncRNA	chr1	56971469..56975196	3728	3.728	0	329160	RIKEN cDNA 9130024F11 gene	GO:0008150 biological_process	GO:0005575 cellular_component	GO:0003674 molecular_function	-	15255.9	0.0152559	0.001		0.0152559	0	0.0305117	0	0	3	0
LOC102636041	#N/A	chr1	57002505..57042519	40015	40.015	0	102636041	-	-	-	-	-	1.70347	0.00536667	0.00315043		0.00536667	0.00315043	0.00189508	0.00883825	3	2	8
LOC105243927	#N/A	chr1	57127309..57150615	23307	23.307	0	105243927	-	-	-	-	-	4.3342	0.0234431	0.00540886		0.0234431	0.00540886	0.0146412	0.032245	3	9	17
BC055402	lncRNA	chr1	complement(57200645..57214996)	14352	14.352	0	407809	cDNA sequence BC055402	-	-	-	-	-74.1424	0.00154013	0.114189		0.00154013	0.114189	0	0.00308026	39	0	1
Gm5254	processed_pseudogene	chr1	complement(57291169..57292499)	1331	1.331	0	383509	predicted gene 5254	-	-	-	-	1	0.001	0.001		0	0	0	0	0	0	0
4930558J18Rik	lncRNA	chr1	complement(57359222..57377544)	18323	18.323	0	75323	RIKEN cDNA 4930558J18 gene	GO:0008150 biological_process	GO:0005575 cellular_component	GO:0003674 molecular_function	-	16888.9	0.0168889	0.001		0.0168889	0	0	0.0337777	0	0	14
1700066M21Rik	protein_coding	chr1	57377594..57385423	7830	3.008	2	73467	RIKEN cDNA 1700066M21 gene	GO:0008150 biological_process	GO:0005575 cellular_component | GO:0005576 extracellular region	GO:0003674 molecular_function	-	-3.89966	0.50511	1.96976	1	0.50511	1.96976	0.554621	0.455599	141	44	31
Tyw5	protein_coding	chr1	complement(57387899..57406674)	18776	2.22	15	68736	tRNA-yW synthesizing protein 5	GO:0008033 tRNA processing | GO:0031591 wybutosine biosynthetic process | GO:0055114 oxidation-reduction process	GO:0005575 cellular_component	GO:0000049 tRNA binding | GO:0005506 iron ion binding | GO:0016491 oxidoreductase activity | GO:0016706 2-oxoglutarate-dependent dioxygenase activity | GO:0042803 protein homodimerization activity | GO:0046872 metal ion binding | GO:0051213 dioxygenase activity	-	-1.55212	0.768306	1.1925	1	0.768306	1.1925	0.700248	0.836364	63	41	42
9430016H08Rik	#N/A	chr1	57406548..57415958	9411	1.325	5	68115	RIKEN cDNA 9430016H08 gene	GO:0007007 inner mitochondrial membrane organization | GO:0032979 protein insertion into mitochondrial inner membrane from matrix | GO:0036444 calcium import into the mitochondrion | GO:0051204 protein insertion into mitochondrial membrane | GO:0051560 mitochondrial calcium ion homeostasis	GO:0005743 mitochondrial inner membrane | GO:0005759 mitochondrial matrix	GO:0043022 ribosome binding	-	-1.86769	3.02253	5.64515	1	3.02253	5.64515	2.1748	3.87027	178	76	116
Gm8581	processed_pseudogene	chr1	complement(57518526..57519368)	843	0.843	0	667339	predicted gene 8581	-	-	-	-	1	0.001	0.001		0	0	0	0	0	0	0
Gm17929	processed_pseudogene	chr1	complement(57561298..57561850)	553	0.553	0	100416126	predicted gene, 17929	-	-	-	-	1	0.001	0.001		0	0	0	0	0	0	0
Spats2l	protein_coding	chr1	57774162..57948398	174237	4.701	23	67198	spermatogenesis associated, serine-rich 2-like	GO:0008150 biological_process	GO:0005634 nucleus | GO:0005654 nucleoplasm | GO:0005730 nucleolus | GO:0005737 cytoplasm | GO:0005829 cytosol | GO:0032991 protein-containing complex	-	-	-1.06413	0.0168002	0.0178777		0.0168002	0.0178777	0.0241965	0.00940392	2	3	1
Kctd18	protein_coding	chr1	complement(57955101..57970084)	14984	3.184	10	51960	potassium channel tetramerisation domain containing 18	GO:0008150 biological_process	GO:0005575 cellular_component	GO:0003674 molecular_function	-	1.35888	0.950504	0.699478		0.950504	0.699478	1.34563	0.555375	53	113	40
Sgol2a	#N/A	chr1	57985340..58026277	40938	5.416	11	68549	shugoshin-like 2 (S. pombe)	GO:0007049 cell cycle | GO:0007059 chromosome segregation | GO:0007140 male meiotic nuclear division | GO:0007143 female meiotic nuclear division | GO:0008104 protein localization | GO:0010789 meiotic sister chromatid cohesion involved in meiosis I | GO:0051301 cell division | GO:0051321 meiotic cell cycle | GO:0051754 meiotic sister chromatid cohesion, centromeric | GO:2000711 positive regulatio…	GO:0000775 chromosome, centromeric region | GO:0000776 kinetochore | GO:0000779 condensed chromosome, centromeric region | GO:0000780 condensed nuclear chromosome, centromeric region | GO:0005634 nucleus | GO:0005654 nucleoplasm | GO:0005694 chromosome | GO:0016604 nuclear body | GO:0030892 mitotic cohesin complex	GO:0005515 protein binding	-	8.79252	0.0682191	0.00775877		0.0682191	0.00775877	0.0140014	0.122437	1	2	15
Aox1	protein_coding	chr1	58029809..58106410	76602	5.68	37	11761	aldehyde oxidase 1	GO:0009115 xanthine catabolic process | GO:0017144 drug metabolic process | GO:0055114 oxidation-reduction process	GO:0005737 cytoplasm | GO:0005829 cytosol	GO:0004031 aldehyde oxidase activity | GO:0004854 xanthine dehydrogenase activity | GO:0005506 iron ion binding | GO:0009055 electron transfer activity | GO:0016491 oxidoreductase activity | GO:0042802 identical protein binding | GO:0042803 protein homodimerization activity | GO:0043546 molybdopterin cofactor binding | GO:0046872 metal ion binding | GO:0050250 retinal oxidase activity | GO:005066…	mmu00280 Valine, leucine and isoleucine degradation | mmu00350 Tyrosine metabolism | mmu00380 Tryptophan metabolism | mmu00750 Vitamin B6 metabolism | mmu00760 Nicotinate and nicotinamide metabolism | mmu00830 Retinol metabolism | mmu00982 Drug metabolism - cytochrome P450 | mmu01100 Metabolic pathways | mmu04630 Jak-STAT signaling pathway	2.98764	0.088412	0.0295926		0.088412	0.0295926	0.060078	0.116746	4	9	15
Aox3	protein_coding	chr1	58113136..58200452	87317	5.181	38	71724	aldehyde oxidase 3	GO:0009115 xanthine catabolic process	GO:0005737 cytoplasm | GO:0005829 cytosol	GO:0004031 aldehyde oxidase activity | GO:0004854 xanthine dehydrogenase activity | GO:0005506 iron ion binding | GO:0009055 electron transfer activity | GO:0016491 oxidoreductase activity | GO:0030151 molybdenum ion binding | GO:0046872 metal ion binding | GO:0050660 flavin adenine dinucleotide binding | GO:0051287 NAD binding | GO:0051536 iron-sulfur cluster binding | GO:0051537 2 iron, 2 sulfu…	mmu00280 Valine, leucine and isoleucine degradation | mmu00350 Tyrosine metabolism | mmu00380 Tryptophan metabolism | mmu00750 Vitamin B6 metabolism | mmu00760 Nicotinate and nicotinamide metabolism | mmu00830 Retinol metabolism | mmu00982 Drug metabolism - cytochrome P450 | mmu01100 Metabolic pathways | mmu04630 Jak-STAT signaling pathway	1	0.001	0.001		0	0	0	0	0	0	0
LOC105243928	#N/A	chr1	complement(58115423..58141341)	25919	25.919	0	105243928	-	-	-	-	-	-1.62809	0.0348532	0.0567441		0.0348532	0.0567441	0.0321829	0.0375235	35	22	22
Aox4	protein_coding	chr1	58210397..58268600	58204	5.151	39	71872	aldehyde oxidase 4	GO:0009115 xanthine catabolic process | GO:0055114 oxidation-reduction process	GO:0005737 cytoplasm | GO:0005829 cytosol	GO:0004031 aldehyde oxidase activity | GO:0004854 xanthine dehydrogenase activity | GO:0005506 iron ion binding | GO:0009055 electron transfer activity | GO:0016491 oxidoreductase activity | GO:0030151 molybdenum ion binding | GO:0046872 metal ion binding | GO:0050660 flavin adenine dinucleotide binding | GO:0051287 NAD binding | GO:0051536 iron-sulfur cluster binding | GO:0051537 2 iron, 2 sulfu…	mmu00280 Valine, leucine and isoleucine degradation | mmu00350 Tyrosine metabolism | mmu00380 Tryptophan metabolism | mmu00750 Vitamin B6 metabolism | mmu00760 Nicotinate and nicotinamide metabolism | mmu00830 Retinol metabolism | mmu00982 Drug metabolism - cytochrome P450 | mmu01100 Metabolic pathways | mmu04630 Jak-STAT signaling pathway	1	0.001	0.001		0	0	0	0	0	0	0
Aox2	protein_coding	chr1	58276141..58379264	103124	5.572	39	213043	aldehyde oxidase 2	GO:0009115 xanthine catabolic process	GO:0005737 cytoplasm | GO:0005829 cytosol	GO:0004031 aldehyde oxidase activity | GO:0004854 xanthine dehydrogenase activity | GO:0005506 iron ion binding | GO:0009055 electron transfer activity | GO:0016491 oxidoreductase activity | GO:0046872 metal ion binding | GO:0050660 flavin adenine dinucleotide binding | GO:0051287 NAD binding | GO:0051536 iron-sulfur cluster binding | GO:0051537 2 iron, 2 sulfur cluster binding | GO:0071949 FAD b…	mmu00280 Valine, leucine and isoleucine degradation | mmu00350 Tyrosine metabolism | mmu00380 Tryptophan metabolism | mmu00750 Vitamin B6 metabolism | mmu00760 Nicotinate and nicotinamide metabolism | mmu00830 Retinol metabolism | mmu00982 Drug metabolism - cytochrome P450 | mmu01100 Metabolic pathways | mmu04630 Jak-STAT signaling pathway	1	0.001	0.001		0	0	0	0	0	0	0
Gm15759	lncRNA	chr1	complement(58289410..58315656)	26247	26.247	0	102636191	-	-	-	-	-	2.60285	0.0458388	0.017611		0.0458388	0.017611	0.00577832	0.0858993	11	4	51
LOC105243929	#N/A	chr1	complement(58366418..58392543)	26126	26.126	0	105243929	-	-	-	-	-	2.22137	0.150061	0.0675535		0.150061	0.0675535	0.220593	0.0795287	42	152	47
Gm6860	#N/A	chr1	complement(58388767..58388990)	224	0.224	0	628262	predicted gene 6860	-	-	-	-	1	0.001	0.001		0	0	0	0	0	0	0
Bzw1	protein_coding	chr1	58393136..58407354	14219	3.74	14	66882	basic leucine zipper and W2 domains 1	-	GO:0005737 cytoplasm	-	-	-1.70017	14.5322	24.7073	1	14.5322	24.7073	13.7572	15.3073	2199	1357	1295
Clk1	protein_coding	chr1	complement(58411988..58424088)	12101	1.83	13	12747	CDC-like kinase 1	GO:0006468 protein phosphorylation | GO:0016310 phosphorylation | GO:0018105 peptidyl-serine phosphorylation | GO:0018107 peptidyl-threonine phosphorylation | GO:0018108 peptidyl-tyrosine phosphorylation | GO:0043484 regulation of RNA splicing | GO:0046777 protein autophosphorylation	GO:0005634 nucleus | GO:0005737 cytoplasm	GO:0000166 nucleotide binding | GO:0004672 protein kinase activity | GO:0004674 protein serine/threonine kinase activity | GO:0004712 protein serine/threonine/tyrosine kinase activity | GO:0004713 protein tyrosine kinase activity | GO:0005515 protein binding | GO:0005524 ATP binding | GO:0016301 kinase activity | GO:0016740 transferase activity	mmu05134 Legionellosis	-2.69723	6.53828	17.6352	1	6.53828	17.6352	6.50579	6.57078	768	314	272
Ppil3	protein_coding	chr1	complement(58430993..58445527)	14535	2.254	19	70225	peptidylprolyl isomerase (cyclophilin)-like 3	GO:0000413 protein peptidyl-prolyl isomerization | GO:0006397 mRNA processing | GO:0006457 protein folding | GO:0008380 RNA splicing	GO:0005681 spliceosomal complex | GO:0071013 catalytic step 2 spliceosome	GO:0003755 peptidyl-prolyl cis-trans isomerase activity | GO:0016853 isomerase activity	-	-2.82931	1.107	3.13204	1	1.107	3.13204	0.84108	1.37291	168	50	70
Nif3l1	protein_coding	chr1	58445156..58462276	17121	2.639	9	65102	Ngg1 interacting factor 3-like 1 (S. pombe)	GO:0030182 neuron differentiation | GO:0045893 positive regulation of transcription, DNA-templated | GO:1903507 negative regulation of nucleic acid-templated transcription	GO:0005634 nucleus | GO:0005737 cytoplasm | GO:0005739 mitochondrion	GO:0005515 protein binding | GO:0008134 transcription factor binding | GO:0042802 identical protein binding	-	-3.02435	1.53212	4.63367	1	1.53212	4.63367	1.7241	1.34014	291	120	80
Orc2	protein_coding	chr1	complement(58462771..58505109)	42339	3.561	21	18393	origin recognition complex, subunit 2	GO:0006260 DNA replication	GO:0000784 nuclear chromosome, telomeric region | GO:0000785 chromatin | GO:0000792 heterochromatin | GO:0000808 origin recognition complex | GO:0000939 condensed chromosome inner kinetochore | GO:0005634 nucleus | GO:0005654 nucleoplasm | GO:0005664 nuclear origin of replication recognition complex | GO:0005813 centrosome	GO:0003688 DNA replication origin binding	mmu04110 Cell cycle	1.0476	1.54527	1.47506	1	1.54527	1.47506	1.79943	1.2911	125	169	104
Gm15834	lncRNA	chr1	58505141..58538839	33699	33.699	0	100504455	-	GO:0008150 biological_process	GO:0005575 cellular_component	GO:0003674 molecular_function	-	-3.69219	0.0884854	0.326705		0.0884854	0.326705	0.0956364	0.0813343	262	85	62
Fam126b	protein_coding	chr1	complement(58522806..58586333)	63528	9.769	20	213056	family with sequence similarity 126, member B	GO:0046854 phosphatidylinositol phosphorylation | GO:0072659 protein localization to plasma membrane	GO:0005622 intracellular | GO:0005737 cytoplasm | GO:0005886 plasma membrane | GO:0016020 membrane	GO:0003674 molecular_function	-	-3.02092	0.835834	2.52499	1	0.835834	2.52499	0.861637	0.810032	587	222	179
Ndufb3	protein_coding	chr1	58586599..58595948	9350	0.532	3	66495	NADH dehydrogenase (ubiquinone) 1 beta subcomplex 3	GO:0022900 electron transport chain | GO:0032981 mitochondrial respiratory chain complex I assembly | GO:0055114 oxidation-reduction process	GO:0005739 mitochondrion | GO:0005743 mitochondrial inner membrane | GO:0005747 mitochondrial respiratory chain complex I | GO:0016020 membrane | GO:0016021 integral component of membrane | GO:0070469 respirasome	GO:0003674 molecular_function	mmu00190 Oxidative phosphorylation | mmu01100 Metabolic pathways | mmu04932 Non-alcoholic fatty liver disease (NAFLD) | mmu05010 Alzheimer's disease | mmu05012 Parkinson's disease | mmu05016 Huntington's disease	1.4105	5.23637	3.71242	1	5.23637	3.71242	3.99115	6.4816	47	56	78
Gm18802	processed_pseudogene	chr1	58636760..58637347	588	0.588	0	100417747	predicted gene, 18802	-	-	-	-	1	0.001	0.001		0	0	0	0	0	0	0
Gm10068	#N/A	chr1	58646593..58648317	1725	1.725	0	100504483	predicted gene 10068	-	-	-	-	1	0.001	0.001		0	0	0	0	0	0	0
Gm20257	transcribed_unprocessed_pseudogene	chr1	58652641..58655831	3191	3.191	0	100504501	predicted gene, 20257	-	-	-	-	-2.31934	0.880058	2.04116	1	0.880058	2.04116	1.08127	0.678842	155	91	49
Als2cr12	#N/A	chr1	complement(58658117..58696010)	37894	3.462	22	108812	amyotrophic lateral sclerosis 2 (juvenile) chromosome region, candidate 12 (human)	GO:0008150 biological_process	GO:0001520 outer dense fiber | GO:0005737 cytoplasm | GO:0005929 cilium | GO:0031514 motile cilium | GO:0035686 sperm fibrous sheath | GO:0036126 sperm flagellum | GO:0042995 cell projection	GO:0003674 molecular_function	-	-2.04674	0.0237215	0.0485517		0.0237215	0.0485517	0.021904	0.0255389	4	2	2
Cflar	protein_coding	chr1	58711310..58759209	47900	8.929	22	12633	CASP8 and FADD-like apoptosis regulator	GO:0006508 proteolysis | GO:0006915 apoptotic process | GO:0006919 activation of cysteine-type endopeptidase activity involved in apoptotic process | GO:0007519 skeletal muscle tissue development | GO:0009617 response to bacterium | GO:0010667 negative regulation of cardiac muscle cell apoptotic process | GO:0010976 positive regulation of neuron projection development | GO:0014732 skeletal muscle…	GO:0005737 cytoplasm | GO:0031264 death-inducing signaling complex | GO:0031265 CD95 death-inducing signaling complex | GO:0045121 membrane raft | GO:0097342 ripoptosome	GO:0002020 protease binding | GO:0004197 cysteine-type endopeptidase activity | GO:0005123 death receptor binding | GO:0005515 protein binding | GO:0008047 enzyme activator activity | GO:0008234 cysteine-type peptidase activity | GO:0016504 peptidase activator activity | GO:0044877 protein-containing complex binding | GO:0097153 cysteine-type endopeptidase activity involved in apoptotic process |…	mmu04064 NF-kappa B signaling pathway | mmu04210 Apoptosis | mmu04668 TNF signaling pathway | mmu05142 Chagas disease (American trypanosomiasis)	-1.54834	6.82369	10.5654	1	6.82369	10.5654	8.31016	5.33722	2245	1957	1078
LOC105243930	#N/A	chr1	complement(58758490..58761938)	3449	3.449	0	105243930	-	-	-	-	-	-1.70772	0.306781	0.523898		0.306781	0.523898	0.241853	0.37171	43	22	29
LOC105243931	#N/A	chr1	complement(58767583..58791874)	24292	24.292	0	105243931	-	-	-	-	-	-1.86294	0.235854	0.439381		0.235854	0.439381	0.173253	0.298456	254	111	164
Casp8	protein_coding	chr1	58795229..58847503	52275	3.038	13	12370	caspase 8	GO:0001525 angiogenesis | GO:0001841 neural tube formation | GO:0006508 proteolysis | GO:0006915 apoptotic process | GO:0006919 activation of cysteine-type endopeptidase activity involved in apoptotic process | GO:0007507 heart development | GO:0008625 extrinsic apoptotic signaling pathway via death domain receptors | GO:0030225 macrophage differentiation | GO:0032731 positive regulation of inter…	GO:0005634 nucleus | GO:0005654 nucleoplasm | GO:0005737 cytoplasm | GO:0005739 mitochondrion | GO:0005829 cytosol | GO:0005886 plasma membrane | GO:0030690 Noc1p-Noc2p complex | GO:0031264 death-inducing signaling complex | GO:0031265 CD95 death-inducing signaling complex | GO:0032991 protein-containing complex | GO:0043005 neuron projection | GO:0044297 cell body | GO:0045121 membrane raft | GO…	GO:0004175 endopeptidase activity | GO:0004197 cysteine-type endopeptidase activity | GO:0005123 death receptor binding | GO:0005164 tumor necrosis factor receptor binding | GO:0005515 protein binding | GO:0008233 peptidase activity | GO:0008234 cysteine-type peptidase activity | GO:0016787 hydrolase activity | GO:0031625 ubiquitin protein ligase binding | GO:0035877 death effector domain binding…	mmu04115 p53 signaling pathway | mmu04210 Apoptosis | mmu04620 Toll-like receptor signaling pathway | mmu04621 NOD-like receptor signaling pathway | mmu04622 RIG-I-like receptor signaling pathway | mmu04668 TNF signaling pathway | mmu04932 Non-alcoholic fatty liver disease (NAFLD) | mmu05010 Alzheimer's disease | mmu05016 Huntington's disease | mmu05134 Legionellosis | mmu05142 Chagas disease (Am…	-1.2205	9.80302	11.9646	1	9.80302	11.9646	11.4571	8.14891	865	918	560
Gm28802	unprocessed_pseudogene	chr1	complement(58849791..58896692)	46902	2.304	13	101056017	-	-	-	-	-	-18238.5	0.001	0.0182385		0	0.0182385	0	0	1	0	0
Trak2	protein_coding	chr1	complement(58900449..58973482)	73034	6.241	22	70827	trafficking protein, kinesin binding 2	GO:0006357 regulation of transcription by RNA polymerase II | GO:0006493 protein O-linked glycosylation | GO:0006605 protein targeting | GO:0008089 anterograde axonal transport | GO:0008104 protein localization | GO:0008333 endosome to lysosome transport | GO:0022008 neurogenesis | GO:0047496 vesicle transport along microtubule | GO:0048311 mitochondrion distribution | GO:0048813 dendrite morphog…	GO:0005634 nucleus | GO:0005737 cytoplasm | GO:0005739 mitochondrion | GO:0005769 early endosome | GO:0005886 plasma membrane | GO:0030425 dendrite | GO:0031410 cytoplasmic vesicle | GO:0043005 neuron projection | GO:0043025 neuronal cell body | GO:0044295 axonal growth cone	GO:0005102 signaling receptor binding | GO:0017022 myosin binding | GO:0019894 kinesin binding | GO:0019899 enzyme binding | GO:0030911 TPR domain binding | GO:0050811 GABA receptor binding	mmu01100 Metabolic pathways | mmu04727 GABAergic synapse	-2.10061	2.15718	4.5314	1	2.15718	4.5314	2.51517	1.7992	673	414	254
Stradb	protein_coding	chr1	58973527..58995126	21600	2.318	12	227154	STE20-related kinase adaptor beta	GO:0000902 cell morphogenesis | GO:0006468 protein phosphorylation | GO:0006611 protein export from nucleus | GO:0007010 cytoskeleton organization | GO:0007049 cell cycle | GO:0007254 JNK cascade | GO:0007346 regulation of mitotic cell cycle | GO:0023014 signal transduction by protein phosphorylation | GO:0031098 stress-activated protein kinase signaling cascade | GO:0032147 activation of protein…	GO:0005634 nucleus | GO:0005737 cytoplasm | GO:0005829 cytosol | GO:0016235 aggresome	GO:0000166 nucleotide binding | GO:0004672 protein kinase activity | GO:0004674 protein serine/threonine kinase activity | GO:0005524 ATP binding	mmu04152 AMPK signaling pathway	-1.87105	1.31768	2.46545	1	1.31768	2.46545	1.24314	1.39222	136	76	73
Gm33589	#N/A	chr1	complement(58994769..59022925)	28157	7.754	13	102636554	-	-	-	-	-	-1.28722	0.0126303	0.016258		0.0126303	0.016258	0.0195594	0.00570129	3	4	1
LOC105243932	#N/A	chr1	59035934..59038188	2255	2.255	0	105243932	-	-	-	-	-	19604.4	0.0196044	0.001		0.0196044	0	0	0.0392087	0	0	2
Als2cr11	#N/A	chr1	complement(59050506..59095015)	44510	2.249	16	73463	amyotrophic lateral sclerosis 2 (juvenile) chromosome region, candidate 11 (human)	GO:0008150 biological_process	GO:0005575 cellular_component	GO:0003674 molecular_function	-	1	0.001	0.001		0	0	0	0	0	0	0
Tmem237	protein_coding	chr1	complement(59100584..59120480)	19897	2.365	18	381259	transmembrane protein 237	GO:0030030 cell projection organization | GO:0030111 regulation of Wnt signaling pathway | GO:0060271 cilium assembly	GO:0005929 cilium | GO:0016020 membrane | GO:0016021 integral component of membrane | GO:0032391 photoreceptor connecting cilium | GO:0035869 ciliary transition zone | GO:0042995 cell projection | GO:0120199 cone photoreceptor outer segment | GO:0120200 rod photoreceptor outer segment	GO:0005515 protein binding	-	1.24263	0.706534	0.568578		0.706534	0.568578	0.721444	0.691624	32	45	37
Mpp4	protein_coding	chr1	complement(59120935..59163389)	42455	3.087	24	227157	membrane protein, palmitoylated 4 (MAGUK p55 subfamily member 4)	GO:0035418 protein localization to synapse	GO:0000139 Golgi membrane | GO:0005737 cytoplasm | GO:0005829 cytosol | GO:0005912 adherens junction | GO:0015629 actin cytoskeleton | GO:0016328 lateral plasma membrane | GO:0032991 protein-containing complex | GO:0042734 presynaptic membrane | GO:0044316 cone cell pedicle | GO:0044317 rod spherule | GO:0045178 basal part of cell	GO:0005102 signaling receptor binding	-	1	0.001	0.001		0	0	0	0	0	0	0
Gm19125	processed_pseudogene	chr1	59155607..59156957	1351	1.351	0	100418297	predicted gene, 19125	-	-	-	-	-839807	0.001	0.839807		0	0.839807	0	0	27	0	0
Als2	protein_coding	chr1	complement(59162756..59237231)	74476	7.038	36	74018	amyotrophic lateral sclerosis 2 (juvenile)	GO:0001662 behavioral fear response | GO:0001881 receptor recycling | GO:0006979 response to oxidative stress | GO:0007032 endosome organization | GO:0007041 lysosomal transport | GO:0007409 axonogenesis | GO:0007528 neuromuscular junction development | GO:0007626 locomotory behavior | GO:0008104 protein localization | GO:0008219 cell death | GO:0016050 vesicle organization | GO:0016197 endosomal…	GO:0001726 ruffle | GO:0005634 nucleus | GO:0005737 cytoplasm | GO:0005769 early endosome | GO:0005813 centrosome | GO:0005829 cytosol | GO:0014069 postsynaptic density | GO:0016020 membrane | GO:0030027 lamellipodium | GO:0030424 axon | GO:0030425 dendrite | GO:0030426 growth cone | GO:0031982 vesicle | GO:0032991 protein-containing complex | GO:0043005 neuron projection | GO:0043025 neuronal ce…	GO:0005085 guanyl-nucleotide exchange factor activity | GO:0005089 Rho guanyl-nucleotide exchange factor activity | GO:0005096 GTPase activator activity | GO:0005515 protein binding | GO:0017112 Rab guanyl-nucleotide exchange factor activity | GO:0017137 Rab GTPase binding | GO:0030676 Rac guanyl-nucleotide exchange factor activity | GO:0042802 identical protein binding | GO:0042803 protein homod…	mmu05014 Amyotrophic lateral sclerosis (ALS)	2.74799	1.37821	0.501535	1	1.37821	0.501535	1.17982	1.57661	84	219	251
LOC105243933	#N/A	chr1	complement(59178156..59178465)	310	0.31	0	105243933	-	-	-	-	-	1	0.001	0.001		0	0	0	0	0	0	0
Gm33667	#N/A	chr1	59237378..59239022	1645	1.645	0	102636662	-	-	-	-	-	1	0.001	0.001		0	0	0	0	0	0	0
Cdk15	protein_coding	chr1	59256889..59352612	95724	2.076	20	271697	cyclin-dependent kinase 15	GO:0006468 protein phosphorylation | GO:0016310 phosphorylation	GO:0005634 nucleus | GO:0005737 cytoplasm | GO:0005829 cytosol	GO:0000166 nucleotide binding | GO:0004672 protein kinase activity | GO:0004674 protein serine/threonine kinase activity | GO:0004693 cyclin-dependent protein serine/threonine kinase activity | GO:0005524 ATP binding | GO:0016301 kinase activity | GO:0016740 transferase activity | GO:0030332 cyclin binding | GO:0046872 metal ion binding	-	-5.29767	0.164296	0.870387		0.164296	0.870387	0.0730557	0.255537	43	4	12
Gm33724	#N/A	chr1	complement(59393246..59418927)	25682	25.682	0	102636732	-	-	-	-	-	2.8697	0.1033	0.0359969		0.1033	0.0359969	0.0620071	0.144594	22	42	84
Gm33774	#N/A	chr1	complement(59455328..59458627)	3300	3.3	0	102636802	-	-	-	-	-	46887.1	0.0468871	0.001		0.0468871	0	0	0.0937742	0	0	7
Fzd7	protein_coding	chr1	59482147..59486955	4809	4.809	1	14369	frizzled homolog 7 (Drosophila)	GO:0006355 regulation of transcription, DNA-templated | GO:0007165 signal transduction | GO:0007166 cell surface receptor signaling pathway | GO:0007186 G protein-coupled receptor signaling pathway | GO:0007275 multicellular organism development | GO:0010812 negative regulation of cell-substrate adhesion | GO:0014834 skeletal muscle satellite cell maintenance involved in skeletal muscle regenerat…	GO:0005768 endosome | GO:0005886 plasma membrane | GO:0016020 membrane | GO:0016021 integral component of membrane | GO:0043231 intracellular membrane-bounded organelle | GO:0055038 recycling endosome membrane	GO:0004888 transmembrane signaling receptor activity | GO:0004930 G protein-coupled receptor activity | GO:0005109 frizzled binding | GO:0005515 protein binding | GO:0005546 phosphatidylinositol-4,5-bisphosphate binding | GO:0017147 Wnt-protein binding | GO:0030165 PDZ domain binding | GO:0042813 Wnt-activated receptor activity	mmu04310 Wnt signaling pathway | mmu04390 Hippo signaling pathway | mmu04550 Signaling pathways regulating pluripotency of stem cells | mmu04916 Melanogenesis | mmu05166 HTLV-I infection | mmu05200 Pathways in cancer | mmu05205 Proteoglycans in cancer | mmu05217 Basal cell carcinoma	2.0018	5.33504	2.66512	1	5.33504	2.66512	6.27595	4.39412	305	796	478
Gm973	protein_coding	chr1	59514723..59636417	121695	7.385	33	381260	predicted gene 973	GO:0008150 biological_process	GO:0005575 cellular_component	GO:0003674 molecular_function	-	15828.5	0.0158285	0.001		0.0158285	0	0.0256709	0.00598617	0	5	1
LOC105243935	#N/A	chr1	complement(59532995..59537221)	4227	4.227	0	105243935	-	-	-	-	-	-17.9619	0.0149434	0.268413		0.0149434	0.268413	0.00896993	0.0209169	27	1	2
Gm28411	lncRNA	chr1	complement(59542117..59550019)	7903	7.903	0	102636957	-	-	-	-	-	50752.7	0.0507527	0.001		0.0507527	0	0.0287859	0.0727194	0	6	13
LOC105243934	#N/A	chr1	complement(59582482..59596208)	13727	13.727	0	105243934	-	-	-	-	-	1610.25	0.00161025	0.001		0.00161025	0	0	0.0032205	0	0	1
Gm33833	#N/A	chr1	complement(59612058..59619439)	7382	7.382	0	102636883	-	-	-	-	-	2994.3	0.0029943	0.001		0.0029943	0	0	0.0059886	0	0	1
Sumo1	protein_coding	chr1	complement(59639434..59670834)	31401	1.215	5	22218	SMT3 suppressor of mif two 3 homolog 1 (yeast)	GO:0006355 regulation of transcription, DNA-templated | GO:0016925 protein sumoylation | GO:0030578 PML body organization | GO:0031334 positive regulation of protein-containing complex assembly | GO:0031647 regulation of protein stability | GO:0032436 positive regulation of proteasomal ubiquitin-dependent protein catabolic process | GO:0034605 cellular response to heat | GO:0043392 negative regul…	GO:0000792 heterochromatin | GO:0001650 fibrillar center | GO:0001741 XY body | GO:0005634 nucleus | GO:0005654 nucleoplasm | GO:0005730 nucleolus | GO:0005737 cytoplasm | GO:0005886 plasma membrane | GO:0008076 voltage-gated potassium channel complex | GO:0016020 membrane | GO:0016604 nuclear body | GO:0016605 PML body | GO:0030425 dendrite | GO:0031510 SUMO activating enzyme complex | GO:003196…	GO:0001222 transcription corepressor binding | GO:0005515 protein binding | GO:0008022 protein C-terminus binding | GO:0008134 transcription factor binding | GO:0015459 potassium channel regulator activity | GO:0019899 enzyme binding | GO:0030674 protein binding, bridging | GO:0031386 protein tag | GO:0031625 ubiquitin protein ligase binding | GO:0035259 glucocorticoid receptor binding | GO:00443…	mmu03013 RNA transport	-2.15734	11.5428	24.9016	1	11.5428	24.9016	11.2968	11.7888	720	362	324
Nop58	protein_coding	chr1	59684951..59711510	26560	2.148	17	55989	NOP58 ribonucleoprotein	GO:0042254 ribosome biogenesis | GO:0048254 snoRNA localization	GO:0001650 fibrillar center | GO:0005634 nucleus | GO:0005654 nucleoplasm | GO:0005730 nucleolus | GO:0005732 small nucleolar ribonucleoprotein complex | GO:0005829 cytosol | GO:0015030 Cajal body | GO:0031428 box C/D snoRNP complex | GO:0032040 small-subunit processome | GO:0070761 pre-snoRNP complex	GO:0001094 TFIID-class transcription factor complex binding | GO:0030515 snoRNA binding | GO:0051117 ATPase binding	mmu03008 Ribosome biogenesis in eukaryotes	-1.32316	3.81455	5.04727	1	3.81455	5.04727	3.88338	3.74573	258	220	182
Snord70	snoRNA	chr1	59691958..59692010	53	0.053	0	100217459	small nucleolar RNA, C/D box 70	GO:0008150 biological_process	GO:0005575 cellular_component	GO:0003674 molecular_function	-	1	0.001	0.001		0	0	0	0	0	0	0
Snord11	snoRNA	chr1	59704808..59704870	63	0.063	0	100217421	small nucleolar RNA, C/D box 11	GO:0008150 biological_process	GO:0005575 cellular_component	GO:0003674 molecular_function	-	1	0.001	0.001		0	0	0	0	0	0	0
Bmpr2	protein_coding	chr1	59764270..59878081	113812	11.096	15	12168	bone morphogenetic protein receptor, type II (serine/threonine kinase)	GO:0001568 blood vessel development | GO:0001707 mesoderm formation | GO:0001893 maternal placenta development | GO:0001934 positive regulation of protein phosphorylation | GO:0001935 endothelial cell proliferation | GO:0001938 positive regulation of endothelial cell proliferation | GO:0001944 vasculature development | GO:0001946 lymphangiogenesis | GO:0001974 blood vessel remodeling | GO:0002063…	GO:0005654 nucleoplasm | GO:0005737 cytoplasm | GO:0005886 plasma membrane | GO:0005887 integral component of plasma membrane | GO:0005901 caveola | GO:0005912 adherens junction | GO:0009925 basal plasma membrane | GO:0009986 cell surface | GO:0014069 postsynaptic density | GO:0016020 membrane | GO:0016021 integral component of membrane | GO:0016324 apical plasma membrane | GO:0030425 dendrite | …	GO:0000166 nucleotide binding | GO:0004672 protein kinase activity | GO:0004674 protein serine/threonine kinase activity | GO:0004675 transmembrane receptor protein serine/threonine kinase activity | GO:0005024 transforming growth factor beta-activated receptor activity | GO:0005515 protein binding | GO:0005524 ATP binding | GO:0016301 kinase activity | GO:0016740 transferase activity | GO:001983…	mmu04060 Cytokine-cytokine receptor interaction | mmu04350 TGF-beta signaling pathway | mmu04390 Hippo signaling pathway | mmu04550 Signaling pathways regulating pluripotency of stem cells | mmu05206 MicroRNAs in cancer	-2.38638	5.2068	12.4254	1	5.2068	12.4254	4.97526	5.43833	3281	1456	1365
Fam117b	protein_coding	chr1	59913006..59985348	72343	5.534	8	72750	family with sequence similarity 117, member B	GO:0008150 biological_process	-	GO:0003674 molecular_function	-	-1.51625	3.10994	4.71546	1	3.10994	4.71546	2.37745	3.84242	621	347	481
Gm18829	processed_pseudogene	chr1	complement(59950406..59952464)	2059	2.059	0	100417792	predicted gene, 18829	-	-	-	-	18414.7	0.0184147	0.001		0.0184147	0	0.0368294	0	0	2	0
Ica1l	protein_coding	chr1	complement(59989068..60043166)	54099	4.38	21	70375	islet cell autoantigen 1-like	GO:0007286 spermatid development | GO:0051049 regulation of transport	GO:0001669 acrosomal vesicle | GO:0005794 Golgi apparatus	GO:0005515 protein binding | GO:0019904 protein domain specific binding	-	-2.21656	0.0043283	0.00959394		0.0043283	0.00959394	0.0086566	0	1	1	0
Wdr12	protein_coding	chr1	complement(60076868..60098500)	21633	3.392	18	57750	WD repeat domain 12	GO:0000460 maturation of 5.8S rRNA | GO:0000463 maturation of LSU-rRNA from tricistronic rRNA transcript (SSU-rRNA, 5.8S rRNA, LSU-rRNA) | GO:0000466 maturation of 5.8S rRNA from tricistronic rRNA transcript (SSU-rRNA, 5.8S rRNA, LSU-rRNA) | GO:0000470 maturation of LSU-rRNA | GO:0006364 rRNA processing | GO:0007219 Notch signaling pathway | GO:0042254 ribosome biogenesis | GO:0051726 regulation …	GO:0005634 nucleus | GO:0005654 nucleoplasm | GO:0005730 nucleolus | GO:0030687 preribosome, large subunit precursor | GO:0070545 PeBoW complex	GO:0005515 protein binding	-	-2.66862	0.649915	1.73438	1	0.649915	1.73438	0.413587	0.886242	140	37	68
Carf	protein_coding	chr1	60098221..60153953	55733	5.815	22	241066	calcium response factor	GO:0035865 cellular response to potassium ion | GO:0045944 positive regulation of transcription by RNA polymerase II | GO:0051090 regulation of DNA-binding transcription factor activity | GO:0061400 positive regulation of transcription from RNA polymerase II promoter in response to calcium ion | GO:0071277 cellular response to calcium ion	GO:0001652 granular component | GO:0005634 nucleus	GO:0000978 RNA polymerase II cis-regulatory region sequence-specific DNA binding | GO:0001228 DNA-binding transcription activator activity, RNA polymerase II-specific | GO:0003677 DNA binding | GO:0003700 DNA-binding transcription factor activity | GO:0005515 protein binding	-	5.42496	0.235217	0.0433584		0.235217	0.0433584	0.280375	0.190059	6	43	25
Gm15464	processed_pseudogene	chr1	60117212..60117738	527	0.527	0	100504573	-	-	-	-	-	1	0.001	0.001		0	0	0	0	0	0	0
Nbeal1	protein_coding	chr1	60178629..60334705	156077	14.523	70	269198	neurobeachin like 1	-	-	-	-	-1.42374	1.50999	2.14983	1	1.50999	2.14983	1.2636	1.75638	743	484	577
Cyp20a1	protein_coding	chr1	60342800..60388060	45261	2.746	17	77951	cytochrome P450, family 20, subfamily a, polypeptide 1	GO:0055114 oxidation-reduction process	GO:0016020 membrane | GO:0016021 integral component of membrane	GO:0004497 monooxygenase activity | GO:0005506 iron ion binding | GO:0016491 oxidoreductase activity | GO:0016705 oxidoreductase activity, acting on paired donors, with incorporation or reduction of molecular oxygen | GO:0020037 heme binding | GO:0046872 metal ion binding	-	-2.12987	2.37101	5.04992	1	2.37101	5.04992	3.24481	1.49721	330	235	93
Abi2	protein_coding	chr1	60408988..60481945	72958	7.474	18	329165	abl-interactor 2	GO:0007399 nervous system development | GO:0007611 learning or memory | GO:0008154 actin polymerization or depolymerization | GO:0016358 dendrite development | GO:0016477 cell migration | GO:0016601 Rac protein signal transduction | GO:0018108 peptidyl-tyrosine phosphorylation | GO:0043010 camera-type eye development | GO:0045186 zonula adherens assembly | GO:0061001 regulation of dendritic spine…	GO:0005737 cytoplasm | GO:0005829 cytosol | GO:0005856 cytoskeleton | GO:0005884 actin filament | GO:0005912 adherens junction | GO:0030027 lamellipodium | GO:0030054 cell junction | GO:0030425 dendrite | GO:0031209 SCAR complex | GO:0032433 filopodium tip | GO:0042995 cell projection | GO:0043197 dendritic spine | GO:0045202 synapse | GO:0098871 postsynaptic actin cytoskeleton | GO:0098978 gluta…	GO:0017124 SH3 domain binding | GO:0031625 ubiquitin protein ligase binding | GO:0048365 Rac GTPase binding | GO:0070064 proline-rich region binding	mmu04810 Regulation of actin cytoskeleton	1.3279	0.918311	0.69155		0.918311	0.69155	0.766029	1.07059	123	151	181
Raph1	protein_coding	chr1	complement(60483185..60567074)	83890	9.658	21	77300	Ras association (RalGDS/AF-6) and pleckstrin homology domains 1	GO:0048675 axon extension	GO:0005829 cytosol | GO:0005886 plasma membrane | GO:0016604 nuclear body | GO:0031252 cell leading edge	GO:0005515 protein binding	-	1.32666	2.84572	2.14502	1	2.84572	2.14502	2.94046	2.75097	493	749	601
LOC102637269	#N/A	chr1	complement(60522767..60523208)	442	0.442	1	102637269	-	-	-	-	-	150027	0.150027	0.001		0.150027	0	0	0.300053	0	0	3
Gm11578	processed_pseudogene	chr1	complement(60591420..60593335)	1916	1.916	0	100042533	-	-	-	-	-	1	0.001	0.001		0	0	0	0	0	0	0
LOC105243936	#N/A	chr1	complement(60594002..60599635)	5634	5.634	0	105243936	-	-	-	-	-	43156.4	0.0431564	0.001		0.0431564	0	0	0.0863128	0	0	11
Eif4a-ps4	processed_pseudogene	chr1	60703918..60705695	1778	1.778	0	13674	eukaryotic translation initiation factor 4A, pseudogene 4	-	-	-	-	-1.26587	1.02686	1.29988	1	1.02686	1.29988	1.1089	0.944824	55	52	38
Cd28	protein_coding	chr1	60746388..60773359	26972	4.317	4	12487	CD28 antigen	GO:0002376 immune system process | GO:0002863 positive regulation of inflammatory response to antigenic stimulus | GO:0006955 immune response | GO:0010628 positive regulation of gene expression | GO:0010629 negative regulation of gene expression | GO:0014068 positive regulation of phosphatidylinositol 3-kinase signaling | GO:0031295 T cell costimulation | GO:0032733 positive regulation of interle…	GO:0001772 immunological synapse | GO:0005886 plasma membrane | GO:0009897 external side of plasma membrane | GO:0009986 cell surface | GO:0016020 membrane | GO:0016021 integral component of membrane | GO:0045121 membrane raft | GO:0098636 protein complex involved in cell adhesion	GO:0002020 protease binding | GO:0005070 SH3/SH2 adaptor activity | GO:0019901 protein kinase binding | GO:0042802 identical protein binding	mmu04514 Cell adhesion molecules (CAMs) | mmu04660 T cell receptor signaling pathway | mmu04672 Intestinal immune network for IgA production | mmu04940 Type I diabetes mellitus | mmu05162 Measles | mmu05320 Autoimmune thyroid disease | mmu05322 Systemic lupus erythematosus | mmu05323 Rheumatoid arthritis | mmu05330 Allograft rejection | mmu05332 Graft-versus-host disease | mmu05416 Viral myocardi…	1.83058	1.15822	0.632707	1	1.15822	0.632707	1.03639	1.28005	65	118	125
2310016D23Rik	lncRNA	chr1	60778461..60803790	25330	25.33	0	76443	-	GO:0008150 biological_process	GO:0005575 cellular_component	GO:0003674 molecular_function	-	-1.70068	0.0273131	0.0464509		0.0273131	0.0464509	0.0389188	0.0157075	28	26	9
Gm11609	processed_pseudogene	chr1	60792505..60793093	589	0.589	0	100416674	predicted gene 11609	-	-	-	-	1	0.001	0.001		0	0	0	0	0	0	0
Gm11581	processed_pseudogene	chr1	60808904..60810437	1534	1.534	0	667555	predicted gene 11581	-	-	-	-	-3.10319	0.0617925	0.191754		0.0617925	0.191754	0.123585	0	7	5	0
LOC105243938	#N/A	chr1	60860958..60894365	33408	33.408	0	105243938	-	-	-	-	-	18.1179	0.0455783	0.00251565		0.0455783	0.00251565	0.0646913	0.0264654	2	57	20
LOC105243937	#N/A	chr1	60886999..60887534	536	0.536	0	105243937	-	-	-	-	-	1	0.001	0.001		0	0	0	0	0	0	0
Rpl18-ps1	processed_pseudogene	chr1	60900862..60901462	601	0.601	0	667100	ribosomal protein L18, pseudogene 1	-	-	-	-	-4.43312	0.063088	0.279677		0.063088	0.279677	0.126176	0	4	2	0
Ctla4	protein_coding	chr1	60909025..60915832	6808	1.933	4	12477	cytotoxic T-lymphocyte-associated protein 4	GO:0002250 adaptive immune response | GO:0002376 immune system process | GO:0006955 immune response | GO:0006974 cellular response to DNA damage stimulus | GO:0030889 negative regulation of B cell proliferation | GO:0042129 regulation of T cell proliferation | GO:0042130 negative regulation of T cell proliferation | GO:0043065 positive regulation of apoptotic process | GO:0045590 negative regulat…	GO:0005794 Golgi apparatus | GO:0005886 plasma membrane | GO:0005887 integral component of plasma membrane | GO:0009897 external side of plasma membrane | GO:0016020 membrane | GO:0016021 integral component of membrane | GO:0045334 clathrin-coated endocytic vesicle | GO:0048471 perinuclear region of cytoplasm | GO:0098636 protein complex involved in cell adhesion	-	mmu04514 Cell adhesion molecules (CAMs) | mmu04660 T cell receptor signaling pathway | mmu05320 Autoimmune thyroid disease | mmu05323 Rheumatoid arthritis	101288	0.101288	0.001		0.101288	0	0.0196151	0.18296	0	1	8
Gm34649	#N/A	chr1	60921232..60945057	23826	23.826	0	102637969	-	-	-	-	-	1.29632	0.0274356	0.0211642		0.0274356	0.0211642	0.0047741	0.050097	12	3	27
Gm11582	processed_pseudogene	chr1	complement(60947954..60949122)	1169	1.169	0	100043049	predicted gene 11582	-	-	-	-	37816.8	0.0378168	0.001		0.0378168	0	0	0.0756336	0	0	2
Icos	protein_coding	chr1	60960773..61000322	39550	4.302	14	54167	inducible T cell co-stimulator	GO:0002517 T cell tolerance induction | GO:0031295 T cell costimulation | GO:0098609 cell-cell adhesion	GO:0005887 integral component of plasma membrane | GO:0009897 external side of plasma membrane | GO:0016020 membrane | GO:0016021 integral component of membrane	GO:0005515 protein binding	mmu04514 Cell adhesion molecules (CAMs) | mmu04660 T cell receptor signaling pathway | mmu04672 Intestinal immune network for IgA production | mmu05340 Primary immunodeficiency	3.03646	0.741495	0.244197		0.741495	0.244197	0.475932	1.00706	25	54	98
Rpl17-ps1	processed_pseudogene	chr1	61075639..61076257	619	0.619	0	433313	ribosomal protein L17, pseudogene 1	-	-	-	-	1	0.001	0.001		0	0	0	0	0	0	0
LOC105243939	#N/A	chr1	61306981..61355557	48577	48.577	0	105243939	-	-	-	-	-	4.32869	0.0187226	0.00432524		0.0187226	0.00432524	0.00468319	0.032762	5	6	36
Gm34824	#N/A	chr1	complement(61334604..61374365)	39762	39.762	0	102638210	-	-	-	-	-	17.4343	0.0368501	0.00211365		0.0368501	0.00211365	0.00476786	0.0689323	2	5	62
9530026F06Rik	lncRNA	chr1	61378432..61395904	17473	17.473	0	77341	RIKEN cDNA 9530026F06 gene	-	-	-	-	7410.15	0.00741015	0.001		0.00741015	0	0.00216997	0.0126503	0	1	5
Pard3b	protein_coding	chr1	61638667..62642284	1003618	9.294	28	72823	par-3 family cell polarity regulator beta	GO:0000226 microtubule cytoskeleton organization | GO:0007049 cell cycle | GO:0007155 cell adhesion | GO:0008104 protein localization | GO:0030010 establishment of cell polarity | GO:0045197 establishment or maintenance of epithelial cell apical/basal polarity | GO:0051301 cell division | GO:0051660 establishment of centrosome localization	GO:0005737 cytoplasm | GO:0005912 adherens junction | GO:0005923 bicellular tight junction | GO:0005938 cell cortex | GO:0016020 membrane | GO:0016324 apical plasma membrane | GO:0030054 cell junction | GO:0032991 protein-containing complex | GO:0043296 apical junction complex	GO:0005515 protein binding | GO:0035091 phosphatidylinositol binding	-	-1.54969	0.134209	0.207982		0.134209	0.207982	0.0163184	0.2521	46	4	53
Gm35022	#N/A	chr1	61781926..61785484	3559	3.559	0	102638464	-	-	-	-	-	1	0.001	0.001		0	0	0	0	0	0	0
Pard3bos1	lncRNA	chr1	complement(61786331..61864579)	78249	78.249	0	74661	-	-	-	-	-	1.22507	0.0197367	0.0161107		0.0197367	0.0161107	0.0106602	0.0288131	30	22	51
LOC105243940	#N/A	chr1	complement(62130358..62136341)	5984	5.984	0	105243940	-	-	-	-	-	1	0.001	0.001		0	0	0	0	0	0	0
Gm34881	#N/A	chr1	complement(62513630..62526071)	12442	12.442	0	102638280	-	-	-	-	-	13.1504	0.0444139	0.00337739		0.0444139	0.00337739	0	0.0888278	1	0	25
LOC105243941	#N/A	chr1	complement(62648577..62692780)	44204	44.204	0	105243941	-	-	-	-	-	2.41257	0.0229345	0.00950626		0.0229345	0.00950626	0.0128662	0.0330029	10	15	33
Nrp2	protein_coding	chr1	62703317..62818692	115376	8.122	19	18187	neuropilin 2	GO:0001525 angiogenesis | GO:0001755 neural crest cell migration | GO:0001764 neuron migration | GO:0003148 outflow tract septum morphogenesis | GO:0007275 multicellular organism development | GO:0007399 nervous system development | GO:0007411 axon guidance | GO:0007507 heart development | GO:0021612 facial nerve structural organization | GO:0021649 vestibulocochlear nerve structural organization…	GO:0005886 plasma membrane | GO:0016020 membrane | GO:0016021 integral component of membrane | GO:0030424 axon | GO:0098978 glutamatergic synapse | GO:0099055 integral component of postsynaptic membrane	GO:0005021 vascular endothelial growth factor-activated receptor activity | GO:0005515 protein binding | GO:0008201 heparin binding | GO:0017154 semaphorin receptor activity | GO:0042802 identical protein binding | GO:0046872 metal ion binding	-	-1.0848	14.4177	15.6403	1	14.4177	15.6403	16.4091	12.4263	3023	3515	2283
LOC105243942	#N/A	chr1	complement(62711675..62718920)	7246	7.246	0	105243942	-	-	-	-	-	4.17203	0.387115	0.0927882		0.387115	0.0927882	0.444777	0.329454	16	85	54
4930487H11Rik	#N/A	chr1	complement(62790918..62794732)	3815	3.815	0	74992	RIKEN cDNA 4930487H11 gene	-	-	-	-	-1.09902	0.280627	0.308414		0.280627	0.308414	0.109325	0.451928	28	11	39
Gm4208	lncRNA	chr1	complement(62820455..62838167)	17713	17.713	0	100043070	-	-	-	-	-	1.4096	0.0133762	0.00948941		0.0133762	0.00948941	0.0192651	0.00748735	4	9	3
Gm35120	#N/A	chr1	62836877..62839810	2934	2.934	0	102638592	-	-	-	-	-	75337.1	0.0753371	0.001		0.0753371	0	0	0.150674	0	0	10
LOC105243943	#N/A	chr1	complement(62840311..62844365)	4055	4.055	0	105243943	-	-	-	-	-	1	0.001	0.001		0	0	0	0	0	0	0
Gm35252	#N/A	chr1	complement(62906176..62956594)	50419	50.419	0	102638767	-	-	-	-	-	6.12599	0.0102114	0.00166689		0.0102114	0.00166689	0.00902419	0.0113985	2	12	13
LOC102638884	#N/A	chr1	complement(62974774..62981429)	6656	6.656	0	102638884	-	-	-	-	-	1	0.001	0.001		0	0	0	0	0	0	0
Ino80d	protein_coding	chr1	complement(63047801..63114267)	66467	14.65	18	227195	INO80 complex subunit D	GO:0006281 DNA repair | GO:0006310 DNA recombination | GO:0006974 cellular response to DNA damage stimulus | GO:0008150 biological_process	GO:0005634 nucleus	GO:0003674 molecular_function	-	-1.83705	3.64273	6.69188	1	3.64273	6.69188	3.64924	3.63621	2333	1410	1205
Rps27-ps1	processed_pseudogene	chr1	63073744..63074066	323	0.323	0	100462728	ribosomal protein S27, pseudogene 1	-	-	-	-	342166	0.342166	0.001		0.342166	0	0	0.684332	0	0	5
Ino80dos	lncRNA	chr1	63114471..63158295	43825	43.825	0	100380944	INO80 complex subunit D, opposite strand	GO:0008150 biological_process	GO:0005575 cellular_component	GO:0003674 molecular_function	-	-1.09203	0.309071	0.337514		0.309071	0.337514	0.353853	0.264289	352	409	262
Ndufs1	protein_coding	chr1	complement(63143592..63176822)	33231	2.979	23	227197	NADH dehydrogenase (ubiquinone) Fe-S protein 1	GO:0008637 apoptotic mitochondrial changes | GO:0042773 ATP synthesis coupled electron transport | GO:0045333 cellular respiration | GO:0046034 ATP metabolic process | GO:0051881 regulation of mitochondrial membrane potential | GO:0055114 oxidation-reduction process | GO:0072593 reactive oxygen species metabolic process	GO:0005739 mitochondrion | GO:0005743 mitochondrial inner membrane | GO:0005747 mitochondrial respiratory chain complex I | GO:0005758 mitochondrial intermembrane space | GO:0016020 membrane | GO:0043209 myelin sheath | GO:0070469 respirasome	GO:0003954 NADH dehydrogenase activity | GO:0008137 NADH dehydrogenase (ubiquinone) activity | GO:0009055 electron transfer activity | GO:0016491 oxidoreductase activity | GO:0016651 oxidoreductase activity, acting on NAD(P)H | GO:0046872 metal ion binding | GO:0051536 iron-sulfur cluster binding | GO:0051537 2 iron, 2 sulfur cluster binding | GO:0051539 4 iron, 4 sulfur cluster binding	mmu00190 Oxidative phosphorylation | mmu01100 Metabolic pathways | mmu04932 Non-alcoholic fatty liver disease (NAFLD) | mmu05010 Alzheimer's disease | mmu05012 Parkinson's disease | mmu05016 Huntington's disease	-2.11598	3.47985	7.36328	1	3.47985	7.36328	3.13102	3.82867	522	246	258
Eef1b2	protein_coding	chr1	63176831..63180486	3656	1.933	6	55949	eukaryotic translation elongation factor 1 beta 2	GO:0006412 translation | GO:0006414 translational elongation | GO:0045471 response to ethanol	GO:0005737 cytoplasm | GO:0005783 endoplasmic reticulum | GO:0005829 cytosol | GO:0005853 eukaryotic translation elongation factor 1 complex	GO:0003746 translation elongation factor activity | GO:0005085 guanyl-nucleotide exchange factor activity | GO:0005515 protein binding	-	-2.13992	10.9715	23.4781	1	10.9715	23.4781	11.7886	10.1543	1080	601	444
Snora41	snoRNA	chr1	63179023..63179135	113	0.113	0	100217464	small nucleolar RNA, H/ACA box 41	GO:0008150 biological_process	GO:0005575 cellular_component	GO:0003674 molecular_function	-	1	0.001	0.001		0	0	0	0	0	0	0
Gpr1	protein_coding	chr1	complement(63182571..63223278)	40708	2.469	8	241070	G protein-coupled receptor 1	GO:0007165 signal transduction | GO:0007218 neuropeptide signaling pathway	GO:0005654 nucleoplasm | GO:0005886 plasma membrane | GO:0005887 integral component of plasma membrane | GO:0016020 membrane | GO:0016021 integral component of membrane | GO:0043005 neuron projection | GO:0043231 intracellular membrane-bounded organelle	GO:0004930 G protein-coupled receptor activity | GO:0042277 peptide binding | GO:0042923 neuropeptide binding	-	1	0.001	0.001		0	0	0	0	0	0	0
Zdbf2	protein_coding	chr1	63200358..63314576	114219	13.322	16	73884	zinc finger, DBF-type containing 2	GO:0008150 biological_process	GO:0005575 cellular_component	GO:0003674 molecular_function	-	4.65927	0.0146967	0.00315429		0.0146967	0.00315429	0.00284611	0.0265473	1	1	8
1700039I01Rik	TEC	chr1	complement(63248014..63253647)	5634	5.634	0	73346	-	GO:0008150 biological_process	GO:0005575 cellular_component	GO:0003674 molecular_function	-	2.55521	0.0190581	0.00745855		0.0190581	0.00745855	0.00672984	0.0313865	1	1	4
Gm11608	lncRNA	chr1	complement(63266677..63273256)	6580	6.58	0	102639043	-	-	-	-	-	3359.26	0.00335926	0.001		0.00335926	0	0	0.00671852	0	0	1
Gm11606	processed_pseudogene	chr1	complement(63357434..63358050)	617	0.617	0	100418466	predicted gene 11606	-	-	-	-	1	0.001	0.001		0	0	0	0	0	0	0
Gm11605	processed_pseudogene	chr1	complement(63364424..63365487)	1064	1.064	0	667644	predicted gene 11605	-	-	-	-	1	0.001	0.001		0	0	0	0	0	0	0
Gm35393	#N/A	chr1	complement(63431305..63437391)	6087	6.087	0	102638958	-	-	-	-	-	2.93149	0.0202375	0.00690348		0.0202375	0.00690348	0.018687	0.021788	1	3	3
Adam23	protein_coding	chr1	63445885..63596515	150631	6.989	31	23792	a disintegrin and metallopeptidase domain 23	GO:0006508 proteolysis | GO:0007155 cell adhesion | GO:1990830 cellular response to leukemia inhibitory factor	GO:0005576 extracellular region | GO:0005886 plasma membrane | GO:0016020 membrane | GO:0016021 integral component of membrane | GO:0098978 glutamatergic synapse | GO:0099056 integral component of presynaptic membrane	GO:0004222 metalloendopeptidase activity | GO:0005515 protein binding | GO:0008237 metallopeptidase activity	-	5.78681	0.10438	0.0180375		0.10438	0.0180375	0.0379756	0.170784	3	7	27
LOC105243944	#N/A	chr1	63615598..63620732	5135	1.388	2	105243944	-	-	-	-	-	222950	0.22295	0.001		0.22295	0	0	0.4459	0	0	14
Dytn	protein_coding	chr1	complement(63622851..63686927)	64077	2.427	15	241073	dystrotelin	GO:0008150 biological_process	GO:0005575 cellular_component | GO:0005886 plasma membrane | GO:0016020 membrane	GO:0003674 molecular_function | GO:0008270 zinc ion binding | GO:0046872 metal ion binding	-	1	0.001	0.001		0	0	0	0	0	0	0
Mdh1b	protein_coding	chr1	complement(63687573..63730547)	42975	1.987	13	76668	malate dehydrogenase 1B, NAD (soluble)	GO:0005975 carbohydrate metabolic process | GO:0006099 tricarboxylic acid cycle | GO:0006107 oxaloacetate metabolic process | GO:0006108 malate metabolic process | GO:0006734 NADH metabolic process | GO:0055114 oxidation-reduction process	-	GO:0003824 catalytic activity | GO:0016491 oxidoreductase activity | GO:0016615 malate dehydrogenase activity | GO:0016616 oxidoreductase activity, acting on the CH-OH group of donors, NAD or NADP as acceptor | GO:0030060 L-malate dehydrogenase activity	-	19082	0.019082	0.001		0.019082	0	0.038164	0	0	2	0
Fastkd2	protein_coding	chr1	63730599..63753385	22787	3.25	15	75619	FAST kinase domains 2	GO:0042254 ribosome biogenesis | GO:0070131 positive regulation of mitochondrial translation | GO:1902775 mitochondrial large ribosomal subunit assembly	GO:0005654 nucleoplasm | GO:0005739 mitochondrion | GO:0035770 ribonucleoprotein granule | GO:0042645 mitochondrial nucleoid | GO:0045171 intercellular bridge	GO:0003723 RNA binding | GO:0004672 protein kinase activity | GO:0019843 rRNA binding	-	1.13721	0.808704	0.711133		0.808704	0.711133	1.07331	0.544096	55	92	40
4933402D24Rik	protein_coding	chr1	complement(63754909..63769267)	14359	1.756	3	74426	RIKEN cDNA 4933402D24 gene	GO:0008150 biological_process	GO:0005575 cellular_component	GO:0003674 molecular_function	-	1	0.001	0.001		0	0	0	0	0	0	0
Gm13751	processed_pseudogene	chr1	complement(63844827..63845632)	806	0.806	0	100416203	predicted gene 13751	-	-	-	-	1	0.001	0.001		0	0	0	0	0	0	0
Cpo	#N/A	chr1	63903504..63936247	32744	1.224	9	102637534	-	-	-	-	-	18058.8	0.0180588	0.001		0.0180588	0	0	0.0361175	0	0	1
Gm13749	lncRNA	chr1	63964727..63968999	4273	4.273	0	433315	predicted gene 13749	-	-	-	-	10345.9	0.0103459	0.001		0.0103459	0	0	0.0206917	0	0	2
Klf7	protein_coding	chr1	complement(64033727..64122341)	88615	3.74	12	93691	Kruppel-like factor 7 (ubiquitous)	GO:0000122 negative regulation of transcription by RNA polymerase II | GO:0006357 regulation of transcription by RNA polymerase II | GO:0007409 axonogenesis | GO:0007411 axon guidance | GO:0042593 glucose homeostasis | GO:0045604 regulation of epidermal cell differentiation | GO:0045893 positive regulation of transcription, DNA-templated | GO:0045944 positive regulation of transcription by RNA po…	GO:0005634 nucleus	GO:0000978 RNA polymerase II cis-regulatory region sequence-specific DNA binding | GO:0000981 DNA-binding transcription factor activity, RNA polymerase II-specific | GO:0001228 DNA-binding transcription activator activity, RNA polymerase II-specific | GO:0003676 nucleic acid binding | GO:0003677 DNA binding | GO:0003700 DNA-binding transcription factor activity | GO:0005515 protein binding | GO:0…	-	-1.69233	2.21085	3.74148	1	2.21085	3.74148	1.49028	2.93143	333	147	248
Mir6899	miRNA	chr1	complement(64042438..64042501)	64	0.064	0	102466760	microRNA 6899	-	-	-	-	1	0.001	0.001		0	0	0	0	0	0	0
Gm13748	lncRNA	chr1	64079334..64101203	21870	21.87	0	102639767	-	-	-	-	-	1.62368	0.149749	0.0922282		0.149749	0.0922282	0.0710815	0.228417	48	41	113
Gm35937	#N/A	chr1	complement(64100583..64103690)	3108	3.108	0	102639682	-	-	-	-	-	1	0.001	0.001		0	0	0	0	0	0	0
Gm35880	#N/A	chr1	64121535..64242211	120677	120.677	0	102639609	-	-	-	-	-	-1.83251	0.0254628	0.0466607		0.0254628	0.0466607	0.00879741	0.0421282	134	28	115
Gm13750	processed_pseudogene	chr1	64150131..64150848	718	0.718	0	241074	predicted gene 13750	-	-	-	-	1	0.001	0.001		0	0	0	0	0	0	0
LOC105243945	#N/A	chr1	complement(64246994..64256156)	9163	9.163	0	105243945	-	-	-	-	-	-220128	0.001	0.220128		0	0.220128	0	0	48	0	0
Gm35803	#N/A	chr1	64279351..64298537	19187	19.187	0	102639502	-	-	-	-	-	-3.24303	0.0195844	0.0635129		0.0195844	0.0635129	0	0.0391689	29	0	17
Gm28980	processed_pseudogene	chr1	complement(64454359..64454608)	250	0.25	0	102639846	-	-	-	-	-	1	0.001	0.001		0	0	0	0	0	0	0
Gm36148	#N/A	chr1	64516797..64521354	4558	4.558	0	102639959	-	-	-	-	-	1	0.001	0.001		0	0	0	0	0	0	0
Creb1	protein_coding	chr1	64532804..64604548	71745	9.583	18	12912	cAMP responsive element binding protein 1	GO:0006355 regulation of transcription, DNA-templated | GO:0006366 transcription by RNA polymerase II | GO:0006468 protein phosphorylation | GO:0007179 transforming growth factor beta receptor signaling pathway | GO:0007409 axonogenesis | GO:0007595 lactation | GO:0007613 memory | GO:0007623 circadian rhythm | GO:0008361 regulation of cell size | GO:0008542 visual learning | GO:0010033 response t…	GO:0000785 chromatin | GO:0000790 nuclear chromatin | GO:0005634 nucleus | GO:0005654 nucleoplasm | GO:0005667 transcription factor complex | GO:0005719 nuclear euchromatin | GO:0005739 mitochondrion | GO:0005759 mitochondrial matrix | GO:0030424 axon | GO:1990589 ATF4-CREB1 transcription factor complex	GO:0000977 RNA polymerase II regulatory region sequence-specific DNA binding | GO:0000978 RNA polymerase II cis-regulatory region sequence-specific DNA binding | GO:0000981 DNA-binding transcription factor activity, RNA polymerase II-specific | GO:0001102 RNA polymerase II activating transcription factor binding | GO:0001225 RNA polymerase II transcription coactivator binding | GO:0001228 DNA-bin…	mmu04022 cGMP-PKG signaling pathway | mmu04024 cAMP signaling pathway | mmu04151 PI3K-Akt signaling pathway | mmu04152 AMPK signaling pathway | mmu04261 Adrenergic signaling in cardiomyocytes | mmu04380 Osteoclast differentiation | mmu04612 Antigen processing and presentation | mmu04668 TNF signaling pathway | mmu04710 Circadian rhythm | mmu04713 Circadian entrainment | mmu04725 Cholinergic synap…	-1.23665	2.59558	3.20982	1	2.59558	3.20982	2.21568	2.97548	732	560	645
Mettl21a	protein_coding	chr1	complement(64606473..64620421)	13949	5.926	7	67099	methyltransferase like 21A	GO:0006479 protein methylation | GO:0018022 peptidyl-lysine methylation | GO:0032259 methylation	GO:0005737 cytoplasm | GO:0032991 protein-containing complex	GO:0008168 methyltransferase activity | GO:0008276 protein methyltransferase activity | GO:0016279 protein-lysine N-methyltransferase activity | GO:0016740 transferase activity | GO:0030544 Hsp70 protein binding | GO:0031072 heat shock protein binding | GO:0051117 ATPase binding	-	12.5373	0.44451	0.0354552		0.44451	0.0354552	0.351902	0.537118	5	55	72
Gm29152	lncRNA	chr1	64652129..64655279	3151	3.151	0	102640020	-	-	-	-	-	1	0.001	0.001		0	0	0	0	0	0	0
2810408I11Rik	lncRNA	chr1	complement(64679869..64690659)	10791	10.791	0	69941	RIKEN cDNA 2810408I11 gene	-	-	-	-	7318.85	0.00731885	0.001		0.00731885	0	0.010541	0.00409673	0	3	1
Ccnyl1	protein_coding	chr1	64691005..64725646	34642	4.349	14	227210	cyclin Y-like 1	GO:0001932 regulation of protein phosphorylation | GO:0007283 spermatogenesis | GO:0030317 flagellated sperm motility | GO:0045737 positive regulation of cyclin-dependent protein serine/threonine kinase activity | GO:0045859 regulation of protein kinase activity	GO:0005737 cytoplasm | GO:0005886 plasma membrane | GO:0016020 membrane	GO:0005515 protein binding | GO:0016538 cyclin-dependent protein serine/threonine kinase regulator activity	-	-1.40529	1.65016	2.31896	1	1.65016	2.31896	1.67391	1.62641	240	192	160
Fzd5	protein_coding	chr1	complement(64730558..64737750)	7193	6.914	3	14367	frizzled homolog 5 (Drosophila)	GO:0000578 embryonic axis specification | GO:0001525 angiogenesis | GO:0001944 vasculature development | GO:0002726 positive regulation of T cell cytokine production | GO:0007165 signal transduction | GO:0007166 cell surface receptor signaling pathway | GO:0007186 G protein-coupled receptor signaling pathway | GO:0007275 multicellular organism development | GO:0008285 negative regulation of cell …	GO:0005769 early endosome | GO:0005794 Golgi apparatus | GO:0005886 plasma membrane | GO:0005887 integral component of plasma membrane | GO:0005923 bicellular tight junction | GO:0009986 cell surface | GO:0016020 membrane | GO:0016021 integral component of membrane | GO:0030054 cell junction | GO:0042995 cell projection | GO:0045202 synapse | GO:0048471 perinuclear region of cytoplasm | GO:009897…	GO:0001540 amyloid-beta binding | GO:0004888 transmembrane signaling receptor activity | GO:0004930 G protein-coupled receptor activity | GO:0005515 protein binding | GO:0008289 lipid binding | GO:0017147 Wnt-protein binding | GO:0019901 protein kinase binding | GO:0031625 ubiquitin protein ligase binding | GO:0042813 Wnt-activated receptor activity | GO:0044877 protein-containing complex binding	mmu04310 Wnt signaling pathway | mmu04390 Hippo signaling pathway | mmu04550 Signaling pathways regulating pluripotency of stem cells | mmu04916 Melanogenesis | mmu05166 HTLV-I infection | mmu05200 Pathways in cancer | mmu05205 Proteoglycans in cancer | mmu05217 Basal cell carcinoma	-1.86072	0.568342	1.05753	1	0.568342	1.05753	0.625168	0.511517	174	114	80
LOC105243946	#N/A	chr1	64737138..64740734	3597	3.597	1	105243946	-	-	-	-	-	16686.1	0.0166861	0.001		0.0166861	0	0.021082	0.0122902	0	2	1
Plekhm3	protein_coding	chr1	complement(64789120..64956824)	167705	9.393	11	241075	pleckstrin homology domain containing, family M, member 3	GO:0045445 myoblast differentiation	GO:0005737 cytoplasm | GO:0005794 Golgi apparatus | GO:0005886 plasma membrane | GO:0016020 membrane	GO:0005515 protein binding | GO:0046872 metal ion binding	-	-1.45094	5.04738	7.32345	1	5.04738	7.32345	5.53419	4.56057	1637	1371	969
Gm18633	#N/A	chr1	64799128..64800123	996	0.996	0	100417475	predicted gene, 18633	-	-	-	-	1	0.001	0.001		0	0	0	0	0	0	0
Rpl31-ps24	processed_pseudogene	chr1	64934401..64934779	379	0.379	0	667245	ribosomal protein L31, pseudogene 24	-	-	-	-	508510	0.50851	0.001		0.50851	0	0.900377	0.116643	0	9	1
Rpl10a-ps1	processed_pseudogene	chr1	complement(64993919..64994631)	713	0.713	0	100043141	ribosomal protein L10A, pseudogene 1	-	-	-	-	-2.65131	1.33375	3.53617	1	1.33375	3.53617	2.23347	0.434018	60	42	7
Akr1cl	protein_coding	chr1	complement(65013078..65032770)	19693	1.383	12	70861	aldo-keto reductase family 1, member C-like	GO:0008202 steroid metabolic process	GO:0005737 cytoplasm | GO:0005829 cytosol	GO:0004032 alditol:NADP+ 1-oxidoreductase activity | GO:0004033 aldo-keto reductase (NADP) activity | GO:0008106 alcohol dehydrogenase (NADP+) activity | GO:0016229 steroid dehydrogenase activity | GO:0016491 oxidoreductase activity | GO:0047086 ketosteroid monooxygenase activity	-	1	0.001	0.001		0	0	0	0	0	0	0
Gm8550	processed_pseudogene	chr1	65027954..65028976	1023	1.023	0	667276	-	-	-	-	-	1	0.001	0.001		0	0	0	0	0	0	0
Cryge	protein_coding	chr1	complement(65048555..65057116)	8562	0.671	5	12968	crystallin, gamma E	GO:0001654 eye development | GO:0002088 lens development in camera-type eye | GO:0007601 visual perception	-	GO:0005212 structural constituent of eye lens	-	1	0.001	0.001		0	0	0	0	0	0	0
Crygd	protein_coding	chr1	complement(65061838..65063440)	1603	0.635	3	12967	crystallin, gamma D	GO:0001654 eye development | GO:0002088 lens development in camera-type eye | GO:0007601 visual perception | GO:0034614 cellular response to reactive oxygen species | GO:0070306 lens fiber cell differentiation	GO:0005634 nucleus | GO:0005737 cytoplasm	GO:0005212 structural constituent of eye lens	-	1	0.001	0.001		0	0	0	0	0	0	0
Crygc	protein_coding	chr1	complement(65071525..65073532)	2008	0.629	4	12966	crystallin, gamma C	GO:0001654 eye development | GO:0002088 lens development in camera-type eye | GO:0007601 visual perception | GO:0043010 camera-type eye development	GO:0005634 nucleus | GO:0005737 cytoplasm	GO:0005212 structural constituent of eye lens	-	1	0.001	0.001		0	0	0	0	0	0	0
Crygb	protein_coding	chr1	complement(65080222..65082290)	2069	0.633	3	12965	crystallin, gamma B	GO:0001654 eye development | GO:0002088 lens development in camera-type eye | GO:0007601 visual perception | GO:0070307 lens fiber cell development | GO:0070309 lens fiber cell morphogenesis	GO:0005634 nucleus | GO:0005737 cytoplasm	GO:0005212 structural constituent of eye lens	-	1	0.001	0.001		0	0	0	0	0	0	0
Gm7329	processed_pseudogene	chr1	65095225..65095779	555	0.555	0	654356	predicted gene 7329	-	-	-	-	1	0.001	0.001		0	0	0	0	0	0	0
Cryga	protein_coding	chr1	complement(65100389..65103363)	2975	0.615	3	12964	crystallin, gamma A	GO:0001654 eye development | GO:0002088 lens development in camera-type eye | GO:0007601 visual perception	-	GO:0005212 structural constituent of eye lens	-	1	0.001	0.001		0	0	0	0	0	0	0
D630023F18Rik	protein_coding	chr1	complement(65105284..65123351)	18068	2.982	18	98303	RIKEN cDNA D630023F18 gene	GO:0008150 biological_process	GO:0005575 cellular_component	GO:0003674 molecular_function	-	103774	0.103774	0.001		0.103774	0	0	0.207548	0	0	14
Gm36358	#N/A	chr1	65111753..65119014	7262	7.262	0	102640244	-	-	-	-	-	-1.34187	1.31093	1.75909	1	1.31093	1.75909	1.1852	1.43666	304	227	236
Idh1	protein_coding	chr1	complement(65158616..65186479)	27864	2.438	10	15926	isocitrate dehydrogenase 1 (NADP+), soluble	GO:0006097 glyoxylate cycle | GO:0006099 tricarboxylic acid cycle | GO:0006102 isocitrate metabolic process | GO:0006103 2-oxoglutarate metabolic process | GO:0006739 NADP metabolic process | GO:0006749 glutathione metabolic process | GO:0006979 response to oxidative stress | GO:0014070 response to organic cyclic compound | GO:0048545 response to steroid hormone | GO:0055114 oxidation-reduction p…	GO:0005737 cytoplasm | GO:0005739 mitochondrion | GO:0005777 peroxisome | GO:0005829 cytosol	GO:0000287 magnesium ion binding | GO:0004448 isocitrate dehydrogenase activity | GO:0004450 isocitrate dehydrogenase (NADP+) activity | GO:0016491 oxidoreductase activity | GO:0016616 oxidoreductase activity, acting on the CH-OH group of donors, NAD or NADP as acceptor | GO:0042802 identical protein binding | GO:0042803 protein homodimerization activity | GO:0046872 metal ion binding | GO:005066…	mmu00020 Citrate cycle (TCA cycle) | mmu00480 Glutathione metabolism | mmu01100 Metabolic pathways | mmu01130 Biosynthesis of antibiotics | mmu01200 Carbon metabolism | mmu01210 2-Oxocarboxylic acid metabolism | mmu01230 Biosynthesis of amino acids | mmu04146 Peroxisome	1.65918	17.0156	10.2554	1	17.0156	10.2554	14.2301	19.801	595	915	1092
Pikfyve	protein_coding	chr1	65186639..65278696	92058	11.552	50	18711	phosphoinositide kinase, FYVE finger containing	GO:0016310 phosphorylation | GO:0032288 myelin assembly | GO:0034504 protein localization to nucleus | GO:0035556 intracellular signal transduction | GO:0042147 retrograde transport, endosome to Golgi | GO:0046488 phosphatidylinositol metabolic process | GO:2000785 regulation of autophagosome assembly	GO:0005768 endosome | GO:0005829 cytosol | GO:0005911 cell-cell junction | GO:0010008 endosome membrane | GO:0012506 vesicle membrane | GO:0016020 membrane | GO:0031410 cytoplasmic vesicle | GO:0031901 early endosome membrane | GO:0032593 insulin-responsive compartment | GO:0043231 intracellular membrane-bounded organelle | GO:0045121 membrane raft | GO:0048471 perinuclear region of cytoplasm	GO:0000166 nucleotide binding | GO:0000285 1-phosphatidylinositol-3-phosphate 5-kinase activity | GO:0005515 protein binding | GO:0005524 ATP binding | GO:0008270 zinc ion binding | GO:0016301 kinase activity | GO:0016307 phosphatidylinositol phosphate kinase activity | GO:0016308 1-phosphatidylinositol-4-phosphate 5-kinase activity | GO:0016740 transferase activity | GO:0046872 metal ion binding	mmu00562 Inositol phosphate metabolism | mmu04070 Phosphatidylinositol signaling system | mmu04145 Phagosome | mmu04810 Regulation of actin cytoskeleton	-1.51393	2.99623	4.53608	1	2.99623	4.53608	2.90802	3.08445	1247	886	806
Pth2r	protein_coding	chr1	65280282..65389625	109344	6.295	19	213527	parathyroid hormone 2 receptor	GO:0007165 signal transduction | GO:0007166 cell surface receptor signaling pathway | GO:0007186 G protein-coupled receptor signaling pathway | GO:0120162 positive regulation of cold-induced thermogenesis	GO:0005886 plasma membrane | GO:0016020 membrane | GO:0016021 integral component of membrane	GO:0004888 transmembrane signaling receptor activity | GO:0004930 G protein-coupled receptor activity | GO:0004991 parathyroid hormone receptor activity | GO:0008528 G protein-coupled peptide receptor activity | GO:0017046 peptide hormone binding	mmu04080 Neuroactive ligand-receptor interaction	12546.1	0.0125461	0.001		0.0125461	0	0.0180695	0.00702269	0	3	1
Gm28923	processed_pseudogene	chr1	complement(65438652..65439046)	395	0.395	0	102640346	-	-	-	-	-	1	0.001	0.001		0	0	0	0	0	0	0
Gm5255	processed_pseudogene	chr1	complement(65550467..65551173)	707	0.707	0	383520	predicted gene 5255	-	-	-	-	1	0.001	0.001		0	0	0	0	0	0	0
LOC101056035	#N/A	chr1	65551153..65553021	1869	1.869	0	101056035	-	-	-	-	-	1	0.001	0.001		0	0	0	0	0	0	0
Crygf	protein_coding	chr1	65926522..65928304	1783	0.622	3	12969	crystallin, gamma F	GO:0001654 eye development | GO:0002088 lens development in camera-type eye | GO:0007601 visual perception	-	GO:0005212 structural constituent of eye lens	-	1	0.001	0.001		0	0	0	0	0	0	0
LOC102637742	#N/A	chr1	complement(66032081..66044915)	12835	1.002	3	102637742	-	-	-	-	-	1	0.001	0.001		0	0	0	0	0	0	0
Gm8812	processed_pseudogene	chr1	66062965..66063379	415	0.415	0	667786	-	-	-	-	-	1	0.001	0.001		0	0	0	0	0	0	0
Map2	protein_coding	chr1	66175246..66442583	267338	11.278	32	17756	microtubule-associated protein 2	GO:0000226 microtubule cytoskeleton organization | GO:0001578 microtubule bundle formation | GO:0007026 negative regulation of microtubule depolymerization | GO:0007409 axonogenesis | GO:0016358 dendrite development | GO:0021954 central nervous system neuron development | GO:0030010 establishment of cell polarity | GO:0030517 negative regulation of axon extension | GO:0031115 negative regulation …	GO:0005622 intracellular | GO:0005737 cytoplasm | GO:0005790 smooth endoplasmic reticulum | GO:0005791 rough endoplasmic reticulum | GO:0005856 cytoskeleton | GO:0005874 microtubule | GO:0005875 microtubule associated complex | GO:0014069 postsynaptic density | GO:0015629 actin cytoskeleton | GO:0015630 microtubule cytoskeleton | GO:0030425 dendrite | GO:0032587 ruffle membrane | GO:0032839 dendr…	GO:0002162 dystroglycan binding | GO:0003779 actin binding | GO:0005515 protein binding | GO:0005516 calmodulin binding | GO:0005519 cytoskeletal regulatory protein binding | GO:0008017 microtubule binding | GO:0015631 tubulin binding | GO:0019901 protein kinase binding	-	1.82868	0.0613225	0.0335337		0.0613225	0.0335337	0.0168097	0.105835	9	5	27
Gm18034	#N/A	chr1	66313268..66313805	538	0.538	0	100416316	predicted gene, 18034	-	-	-	-	1	0.001	0.001		0	0	0	0	0	0	0
Unc80	protein_coding	chr1	66468295..66699148	230854	13.73	73	329178	unc-80 homolog (C. elegans)	GO:0055080 cation homeostasis	GO:0016020 membrane | GO:0016021 integral component of membrane | GO:0030424 axon | GO:0034703 cation channel complex	GO:0005261 cation channel activity | GO:0005515 protein binding	-	8.94421	0.0273743	0.00306056		0.0273743	0.00306056	0.0193308	0.0354178	1	7	11
LOC105243947	#N/A	chr1	complement(66649712..66653295)	3584	3.584	0	105243947	-	-	-	-	-	1	0.001	0.001		0	0	0	0	0	0	0
Rpe	protein_coding	chr1	66700797..66719805	19009	3.147	14	66646	ribulose-5-phosphate-3-epimerase	GO:0005975 carbohydrate metabolic process | GO:0006098 pentose-phosphate shunt | GO:0009052 pentose-phosphate shunt, non-oxidative branch | GO:0019323 pentose catabolic process | GO:0044262 cellular carbohydrate metabolic process	GO:0005829 cytosol | GO:0043231 intracellular membrane-bounded organelle	GO:0003824 catalytic activity | GO:0004750 ribulose-phosphate 3-epimerase activity | GO:0016853 isomerase activity | GO:0016857 racemase and epimerase activity, acting on carbohydrates and derivatives | GO:0030246 carbohydrate binding | GO:0042802 identical protein binding | GO:0042803 protein homodimerization activity | GO:0046872 metal ion binding | GO:0048029 monosaccharide binding	mmu00030 Pentose phosphate pathway | mmu00040 Pentose and glucuronate interconversions | mmu01100 Metabolic pathways | mmu01130 Biosynthesis of antibiotics | mmu01200 Carbon metabolism | mmu01230 Biosynthesis of amino acids	-1.73303	3.96034	6.86337	1	3.96034	6.86337	2.97592	4.94476	514	247	352
Kansl1l	protein_coding	chr1	complement(66719243..66817596)	98354	11.425	31	68691	KAT8 regulatory NSL complex subunit 1-like	GO:0008150 biological_process	GO:0000123 histone acetyltransferase complex | GO:0044545 NSL complex	GO:0035035 histone acetyltransferase binding | GO:0043995 histone acetyltransferase activity (H4-K5 specific) | GO:0043996 histone acetyltransferase activity (H4-K8 specific) | GO:0046972 histone acetyltransferase activity (H4-K16 specific)	-	-2.7011	0.837432	2.26199	1	0.837432	2.26199	0.842944	0.83192	615	254	215
LOC105243948	#N/A	chr1	66781073..66800849	19777	19.777	0	105243948	-	-	-	-	-	-1.25856	0.369726	0.465323		0.369726	0.465323	0.325919	0.413533	219	170	185
Gm15789	processed_pseudogene	chr1	66783913..66786515	2603	2.603	0	100417476	predicted gene 15789	-	-	-	-	1	0.001	0.001		0	0	0	0	0	0	0
Acadl	protein_coding	chr1	complement(66830839..66863309)	32471	1.948	11	11363	acyl-Coenzyme A dehydrogenase, long-chain	GO:0001659 temperature homeostasis | GO:0006629 lipid metabolic process | GO:0006631 fatty acid metabolic process | GO:0009062 fatty acid catabolic process | GO:0009409 response to cold | GO:0019254 carnitine metabolic process, CoA-linked | GO:0033539 fatty acid beta-oxidation using acyl-CoA dehydrogenase | GO:0042413 carnitine catabolic process | GO:0042758 long-chain fatty acid catabolic proces…	GO:0005739 mitochondrion | GO:0005759 mitochondrial matrix | GO:0031966 mitochondrial membrane	GO:0000062 fatty-acyl-CoA binding | GO:0003995 acyl-CoA dehydrogenase activity | GO:0004466 long-chain-acyl-CoA dehydrogenase activity | GO:0016401 palmitoyl-CoA oxidase activity | GO:0016491 oxidoreductase activity | GO:0016627 oxidoreductase activity, acting on the CH-CH group of donors | GO:0042802 identical protein binding | GO:0050660 flavin adenine dinucleotide binding	mmu00071 Fatty acid degradation | mmu01100 Metabolic pathways | mmu01212 Fatty acid metabolism | mmu03320 PPAR signaling pathway	-2.96096	5.73357	16.9768	1	5.73357	16.9768	5.56671	5.90043	787	286	260
LOC105243949	#N/A	chr1	complement(66839323..66840637)	1315	1.315	0	105243949	-	-	-	-	-	1	0.001	0.001		0	0	0	0	0	0	0
Gm15793	processed_pseudogene	chr1	complement(66849058..66849701)	644	0.644	0	102640707	-	-	-	-	-	1	0.001	0.001		0	0	0	0	0	0	0
Myl1	protein_coding	chr1	complement(66924295..66945473)	21179	1.475	13	17901	myosin, light polypeptide 1	GO:0006936 muscle contraction | GO:0060048 cardiac muscle contraction	GO:0016459 myosin complex | GO:0030016 myofibril | GO:0043292 contractile fiber	GO:0005509 calcium ion binding | GO:0008307 structural constituent of muscle	-	1	0.001	0.001		0	0	0	0	0	0	0
Rpl31-ps14	processed_pseudogene	chr1	complement(66948492..66948995)	504	0.504	0	100043192	ribosomal protein L31, pseudogene 14	-	-	-	-	87713.9	0.0877139	0.001		0.0877139	0	0	0.175428	0	0	2
Gm15826	processed_pseudogene	chr1	66951829..66953445	1617	1.617	0	100416784	predicted gene 15826	-	-	-	-	1	0.001	0.001		0	0	0	0	0	0	0
Lancl1	protein_coding	chr1	complement(67000517..67038872)	38356	4.528	14	14768	LanC (bacterial lantibiotic synthetase component C)-like 1	GO:0043523 regulation of neuron apoptotic process | GO:1903203 regulation of oxidative stress-induced neuron death	GO:0005737 cytoplasm | GO:0005886 plasma membrane | GO:0016020 membrane	GO:0003824 catalytic activity | GO:0004364 glutathione transferase activity | GO:0008270 zinc ion binding | GO:0016740 transferase activity | GO:0017124 SH3 domain binding | GO:0043295 glutathione binding | GO:0046872 metal ion binding | GO:0050750 low-density lipoprotein particle receptor binding	-	-1.89521	0.484777	0.918756		0.484777	0.918756	0.334946	0.634609	99	40	65
Cps1	protein_coding	chr1	67122426..67231267	108842	5.579	41	227231	carbamoyl-phosphate synthetase 1	GO:0000050 urea cycle | GO:0006207 'de novo' pyrimidine nucleobase biosynthetic process | GO:0006541 glutamine metabolic process | GO:0006807 nitrogen compound metabolic process | GO:0008152 metabolic process | GO:0019433 triglyceride catabolic process | GO:0032496 response to lipopolysaccharide | GO:0042311 vasodilation | GO:0046209 nitric oxide metabolic process | GO:0050667 homocysteine metabo…	GO:0005634 nucleus | GO:0005730 nucleolus | GO:0005737 cytoplasm | GO:0005739 mitochondrion | GO:0005743 mitochondrial inner membrane | GO:0032991 protein-containing complex | GO:0042645 mitochondrial nucleoid	GO:0000166 nucleotide binding | GO:0003824 catalytic activity | GO:0004087 carbamoyl-phosphate synthase (ammonia) activity | GO:0004088 carbamoyl-phosphate synthase (glutamine-hydrolyzing) activity | GO:0004175 endopeptidase activity | GO:0005509 calcium ion binding | GO:0005515 protein binding | GO:0005524 ATP binding | GO:0005543 phospholipid binding | GO:0016595 glutamate binding | GO:0016874 …	mmu00220 Arginine biosynthesis | mmu00250 Alanine, aspartate and glutamate metabolism | mmu00910 Nitrogen metabolism | mmu01100 Metabolic pathways | mmu01200 Carbon metabolism | mmu01230 Biosynthesis of amino acids	1	0.001	0.001		0	0	0	0	0	0	0
LOC105243950	#N/A	chr1	complement(67345246..67367949)	22704	22.704	0	105243950	-	-	-	-	-	4.02193	0.0148879	0.00370168		0.0148879	0.00370168	0.0200401	0.00973569	2	12	5
Kif22-ps	processed_pseudogene	chr1	67585049..67587101	2053	2.053	0	110032	kinesin family member 22, pseudogene	-	-	-	-	1	0.001	0.001		0	0	0	0	0	0	0
LOC105243951	#N/A	chr1	67792457..67819926	27470	27.47	0	105243951	-	-	-	-	-	19197.2	0.0191972	0.001		0.0191972	0	0.00138027	0.0370142	0	1	23
Erbb4	protein_coding	chr1	complement(68031904..69108794)	1076891	16.463	34	13869	v-erb-a erythroblastic leukemia viral oncogene homolog 4 (avian)	GO:0001755 neural crest cell migration | GO:0006468 protein phosphorylation | GO:0006915 apoptotic process | GO:0007165 signal transduction | GO:0007169 transmembrane receptor protein tyrosine kinase signaling pathway | GO:0007275 multicellular organism development | GO:0007399 nervous system development | GO:0007416 synapse assembly | GO:0007507 heart development | GO:0007595 lactation | GO:0008…	GO:0005634 nucleus | GO:0005737 cytoplasm | GO:0005739 mitochondrion | GO:0005886 plasma membrane | GO:0005887 integral component of plasma membrane | GO:0005901 caveola | GO:0009925 basal plasma membrane | GO:0014069 postsynaptic density | GO:0016020 membrane | GO:0016021 integral component of membrane | GO:0016323 basolateral plasma membrane | GO:0043235 receptor complex | GO:0045121 membrane r…	GO:0000166 nucleotide binding | GO:0004672 protein kinase activity | GO:0004713 protein tyrosine kinase activity | GO:0004714 transmembrane receptor protein tyrosine kinase activity | GO:0005154 epidermal growth factor receptor binding | GO:0005515 protein binding | GO:0005524 ATP binding | GO:0016301 kinase activity | GO:0016740 transferase activity | GO:0038132 neuregulin binding | GO:0042803 p…	mmu04012 ErbB signaling pathway | mmu04020 Calcium signaling pathway | mmu04144 Endocytosis | mmu05205 Proteoglycans in cancer	2.59264	0.0132353	0.00510496		0.0132353	0.00510496	0.0023031	0.0241676	2	1	9
Gm8840	processed_pseudogene	chr1	complement(69130834..69131318)	485	0.485	0	667842	-	-	-	-	-	1	0.001	0.001		0	0	0	0	0	0	0
Pced1c-ps	processed_pseudogene	chr1	69377298..69378524	1227	1.227	0	241084	PC-esterase domain containing 1C, pseudogene	-	-	-	-	1	0.001	0.001		0	0	0	0	0	0	0
Gm28497	lncRNA	chr1	69431135..69444090	12956	12.956	0	102640814	-	-	-	-	-	1.20274	0.00780192	0.0064868		0.00780192	0.0064868	0.00877954	0.0068243	2	3	2
Ikzf2	protein_coding	chr1	complement(69531207..69687351)	156145	10.391	23	22779	IKAROS family zinc finger 2	GO:0045944 positive regulation of transcription by RNA polymerase II	GO:0005634 nucleus | GO:0005654 nucleoplasm	GO:0003676 nucleic acid binding | GO:0003677 DNA binding | GO:0003700 DNA-binding transcription factor activity | GO:0005515 protein binding | GO:0042802 identical protein binding | GO:0044212 transcription regulatory region DNA binding | GO:0046872 metal ion binding	-	-1.63178	0.339526	0.554032		0.339526	0.554032	0.266371	0.41268	137	73	97
Gm29822	#N/A	chr1	complement(69769263..69788525)	19263	19.263	0	102631499	-	-	-	-	-	-1.04598	0.0375402	0.0392663		0.0375402	0.0392663	0.00393665	0.0711438	18	2	31
Spag16	protein_coding	chr1	69826872..70725132	898261	5.559	25	66722	sperm associated antigen 16	GO:0007288 sperm axoneme assembly | GO:0030030 cell projection organization | GO:0035082 axoneme assembly | GO:0051012 microtubule sliding | GO:0060271 cilium assembly | GO:0060294 cilium movement involved in cell motility | GO:0097231 cell motility in response to calcium ion	GO:0005634 nucleus | GO:0005737 cytoplasm | GO:0005856 cytoskeleton | GO:0005929 cilium | GO:0005930 axoneme | GO:0031514 motile cilium | GO:0036126 sperm flagellum | GO:0042995 cell projection | GO:1990716 axonemal central apparatus	GO:0005515 protein binding | GO:0019901 protein kinase binding	-	-1.58424	0.0715723	0.113388		0.0715723	0.113388	0	0.143145	15	0	18
Gm17972	#N/A	chr1	70535545..70536179	635	0.635	0	100416215	predicted gene, 17972	-	-	-	-	1	0.001	0.001		0	0	0	0	0	0	0
Vwc2l	protein_coding	chr1	70725221..70886514	161294	7.272	10	320460	von Willebrand factor C domain-containing protein 2-like	GO:0007275 multicellular organism development | GO:0030514 negative regulation of BMP signaling pathway | GO:0045666 positive regulation of neuron differentiation	GO:0005576 extracellular region | GO:0005615 extracellular space | GO:0030054 cell junction | GO:0032281 AMPA glutamate receptor complex | GO:0045202 synapse	GO:0003674 molecular_function	-	3039.59	0.00303959	0.001		0.00303959	0	0	0.00607918	0	0	1
Gm29906	#N/A	chr1	complement(70851015..70918626)	67612	67.612	0	102631609	-	-	-	-	-	23.4461	0.0145719	0.001		0.0145719	0.000621509	0.00168236	0.0274615	1	3	42
LOC100534391	#N/A	chr1	70906748..70908067	1320	1.32	0	100534391	ATP synthase, H+ transporting, mitochondrial F1 complex, alpha subunit 1 pseudogene	-	-	-	-	1	0.001	0.001		0	0	0	0	0	0	0
Bard1	protein_coding	chr1	complement(71027531..71103233)	75703	5.713	15	12021	BRCA1 associated RING domain 1	GO:0006281 DNA repair | GO:0006974 cellular response to DNA damage stimulus | GO:0042325 regulation of phosphorylation | GO:0043065 positive regulation of apoptotic process | GO:0043066 negative regulation of apoptotic process | GO:0046826 negative regulation of protein export from nucleus | GO:0085020 protein K6-linked ubiquitination	GO:0005634 nucleus | GO:0005737 cytoplasm | GO:0016607 nuclear speck | GO:0031436 BRCA1-BARD1 complex | GO:0036464 cytoplasmic ribonucleoprotein granule | GO:0070531 BRCA1-A complex	GO:0003723 RNA binding | GO:0004842 ubiquitin-protein transferase activity | GO:0016740 transferase activity | GO:0042803 protein homodimerization activity | GO:0046872 metal ion binding | GO:0046982 protein heterodimerization activity	-	-3.26841	0.0967695	0.316283		0.0967695	0.316283	0.139372	0.0541668	43	21	7
Gm8870	processed_pseudogene	chr1	complement(71155199..71156040)	842	0.842	0	667900	predicted gene 8870	-	-	-	-	1	0.001	0.001		0	0	0	0	0	0	0
Abca12	protein_coding	chr1	complement(71243090..71414910)	171821	8.323	53	74591	ATP-binding cassette, sub-family A (ABC1), member 12	GO:0006869 lipid transport | GO:0010875 positive regulation of cholesterol efflux | GO:0030216 keratinocyte differentiation | GO:0031424 keratinization | GO:0032940 secretion by cell | GO:0033700 phospholipid efflux | GO:0035627 ceramide transport | GO:0043129 surfactant homeostasis | GO:0045055 regulated exocytosis | GO:0048286 lung alveolus development | GO:0055088 lipid homeostasis | GO:006143…	GO:0005737 cytoplasm | GO:0005743 mitochondrial inner membrane | GO:0005829 cytosol | GO:0005886 plasma membrane | GO:0043231 intracellular membrane-bounded organelle | GO:0097209 epidermal lamellar body	GO:0005102 signaling receptor binding | GO:0005319 lipid transporter activity | GO:0005515 protein binding | GO:0034191 apolipoprotein A-I receptor binding | GO:0042626 ATPase-coupled transmembrane transporter activity	mmu02010 ABC transporters	2655.76	0.00265576	0.001		0.00265576	0	0	0.00531153	0	0	1
LOC105243952	#N/A	chr1	71327290..71329244	1955	1.955	0	105243952	-	-	-	-	-	-21494.4	0.001	0.0214944		0	0.0214944	0	0	1	0	0
Gm6947	processed_pseudogene	chr1	complement(71493621..71494189)	569	0.569	0	629101	-	-	-	-	-	1	0.001	0.001		0	0	0	0	0	0	0
Atic	protein_coding	chr1	71557156..71579403	22248	2.611	16	108147	5-aminoimidazole-4-carboxamide ribonucleotide formyltransferase/IMP cyclohydrolase	GO:0006164 purine nucleotide biosynthetic process | GO:0006189 'de novo' IMP biosynthetic process | GO:0008152 metabolic process | GO:0009116 nucleoside metabolic process | GO:0009259 ribonucleotide metabolic process | GO:0046452 dihydrofolate metabolic process | GO:0046654 tetrahydrofolate biosynthetic process | GO:0098761 cellular response to interleukin-7	GO:0005739 mitochondrion | GO:0005829 cytosol | GO:0005886 plasma membrane	GO:0003824 catalytic activity | GO:0003937 IMP cyclohydrolase activity | GO:0004643 phosphoribosylaminoimidazolecarboxamide formyltransferase activity | GO:0016740 transferase activity | GO:0016787 hydrolase activity | GO:0042803 protein homodimerization activity	mmu00230 Purine metabolism | mmu00670 One carbon pool by folate | mmu01100 Metabolic pathways | mmu01130 Biosynthesis of antibiotics	-2.25138	2.20174	4.95696	1	2.20174	4.95696	2.13467	2.2688	308	147	134
Fn1	protein_coding	chr1	complement(71585473..71653234)	67762	8.425	50	14268	fibronectin 1	GO:0001525 angiogenesis | GO:0001775 cell activation | GO:0001932 regulation of protein phosphorylation | GO:0006953 acute-phase response | GO:0007044 cell-substrate junction assembly | GO:0007155 cell adhesion | GO:0007160 cell-matrix adhesion | GO:0007161 calcium-independent cell-matrix adhesion | GO:0008284 positive regulation of cell population proliferation | GO:0008347 glial cell migration …	GO:0005576 extracellular region | GO:0005577 fibrinogen complex | GO:0005604 basement membrane | GO:0005615 extracellular space | GO:0005793 endoplasmic reticulum-Golgi intermediate compartment | GO:0016324 apical plasma membrane | GO:0031012 extracellular matrix | GO:0062023 collagen-containing extracellular matrix | GO:0070062 extracellular exosome	GO:0002020 protease binding | GO:0005102 signaling receptor binding | GO:0005178 integrin binding | GO:0005201 extracellular matrix structural constituent | GO:0005515 protein binding | GO:0008022 protein C-terminus binding | GO:0008201 heparin binding | GO:0016504 peptidase activator activity | GO:0019899 enzyme binding | GO:0042802 identical protein binding | GO:0043394 proteoglycan binding | G…	mmu04151 PI3K-Akt signaling pathway | mmu04510 Focal adhesion | mmu04512 ECM-receptor interaction | mmu04810 Regulation of actin cytoskeleton | mmu05100 Bacterial invasion of epithelial cells | mmu05146 Amoebiasis | mmu05200 Pathways in cancer | mmu05205 Proteoglycans in cancer | mmu05222 Small cell lung cancer	8.79969	37.2629	4.23457	1	37.2629	4.23457	41.6152	32.9106	849	9247	6272
Apol7d	lncRNA	chr1	71653335..71662843	9509	9.509	0	100042814	apolipoprotein L 7d	GO:0008150 biological_process	GO:0005575 cellular_component	GO:0003674 molecular_function	-	166782	0.166782	0.001		0.166782	0	0.259179	0.0743848	0	65	16
Gm19003	#N/A	chr1	71664769..71665906	1138	1.138	0	100418103	predicted gene, 19003	-	-	-	-	155388	0.155388	0.001		0.155388	0	0	0.310776	0	0	8
Gm5829	processed_pseudogene	chr1	complement(71709512..71710117)	606	0.606	0	545326	predicted gene 5829	-	-	-	-	1	0.001	0.001		0	0	0	0	0	0	0
Gm5256	processed_pseudogene	chr1	complement(71713808..71728539)	14732	14.732	0	383528	-	-	-	-	-	9002.41	0.00900241	0.001		0.00900241	0	0	0.0180048	0	0	6
LOC105243953	#N/A	chr1	complement(71728539..71741356)	12818	12.818	0	105243953	-	-	-	-	-	8.75802	0.0574231	0.00655663		0.0574231	0.00655663	0.0769085	0.0379378	2	26	11
Gm30160	#N/A	chr1	71730016..71751917	21902	21.902	0	102631962	-	-	-	-	-	-1.61908	0.103095	0.166919		0.103095	0.166919	0.0346232	0.171567	87	20	85
Gm30308	#N/A	chr1	71813563..71835845	22283	22.283	0	102632161	-	-	-	-	-	6.61653	0.024955	0.00377162		0.024955	0.00377162	0.0459422	0.00396785	2	27	2
Gm8883	lncRNA	chr1	71888112..71891204	3093	3.093	0	667931	predicted gene 8883	-	-	-	-	1	0.001	0.001		0	0	0	0	0	0	0
Gm28818	lncRNA	chr1	complement(71893835..71917125)	23291	23.291	0	102632274	-	-	-	-	-	-2.08724	0.0138303	0.0288671		0.0138303	0.0288671	0.00488376	0.0227768	16	3	12
4933417E11Rik	lncRNA	chr1	complement(71958998..72005195)	46198	46.198	0	71134	RIKEN cDNA 4933417E11 gene	-	-	-	-	-1.74575	0.01511	0.0263783		0.01511	0.0263783	0.0139523	0.0162677	29	17	17
Gm5528	processed_pseudogene	chr1	72004279..72004770	492	0.492	0	433319	-	-	-	-	-	1	0.001	0.001		0	0	0	0	0	0	0
Gm8885	processed_pseudogene	chr1	72087856..72088454	599	0.599	0	667937	predicted gene 8885	-	-	-	-	1	0.001	0.001		0	0	0	0	0	0	0
Gm4319	lncRNA	chr1	complement(72107142..72123738)	16597	16.597	0	100043255	-	-	-	-	-	-4.43587	0.00399541	0.0177231		0.00399541	0.0177231	0	0.00799081	7	0	3
Mreg	protein_coding	chr1	complement(72159233..72212307)	53075	3.721	8	381269	melanoregulin	GO:0030318 melanocyte differentiation | GO:0032400 melanosome localization | GO:0032402 melanosome transport | GO:0042640 anagen | GO:0043473 pigmentation | GO:0048066 developmental pigmentation | GO:0072385 minus-end-directed organelle transport along microtubule | GO:0090382 phagosome maturation	GO:0005764 lysosome | GO:0005886 plasma membrane | GO:0016020 membrane | GO:0030659 cytoplasmic vesicle membrane | GO:0031300 intrinsic component of organelle membrane | GO:0031410 cytoplasmic vesicle | GO:0031902 late endosome membrane | GO:0032991 protein-containing complex | GO:0033162 melanosome membrane | GO:0042470 melanosome	GO:0005515 protein binding | GO:0008289 lipid binding | GO:0035091 phosphatidylinositol binding	-	-1.79623	2.03701	3.65895	1	2.03701	3.65895	1.08011	2.99392	324	106	252
D230017M19Rik	#N/A	chr1	72236015..72272340	36326	36.326	0	320933	-	GO:0008150 biological_process	GO:0005575 cellular_component	GO:0003674 molecular_function	-	2.48366	11.5124	4.63525	1	11.5124	4.63525	8.04745	14.9773	4007	7710	12307
Pecr	protein_coding	chr1	complement(72259172..72284314)	25143	1.186	9	111175	peroxisomal trans-2-enoyl-CoA reductase	GO:0006629 lipid metabolic process | GO:0006631 fatty acid metabolic process | GO:0006633 fatty acid biosynthetic process | GO:0030497 fatty acid elongation | GO:0033306 phytol metabolic process | GO:0055114 oxidation-reduction process	GO:0005739 mitochondrion | GO:0005777 peroxisome | GO:0005778 peroxisomal membrane | GO:0043231 intracellular membrane-bounded organelle	GO:0005102 signaling receptor binding | GO:0016491 oxidoreductase activity | GO:0019166 trans-2-enoyl-CoA reductase (NADPH) activity	mmu01040 Biosynthesis of unsaturated fatty acids | mmu01212 Fatty acid metabolism | mmu04146 Peroxisome	-1.2826	0.220996	0.28345		0.220996	0.28345	0.0319696	0.410022	8	1	11
Tmem169	protein_coding	chr1	72284362..72303104	18743	3.067	7	271711	transmembrane protein 169	GO:0008150 biological_process	GO:0005575 cellular_component | GO:0016020 membrane | GO:0016021 integral component of membrane	GO:0003674 molecular_function	-	1	0.001	0.001		0	0	0	0	0	0	0
Xrcc5	protein_coding	chr1	72307417..72394953	87537	2.946	25	22596	X-ray repair complementing defective repair in Chinese hamster cells 5	GO:0000237 leptotene | GO:0000723 telomere maintenance | GO:0002218 activation of innate immune response | GO:0002376 immune system process | GO:0006281 DNA repair | GO:0006302 double-strand break repair | GO:0006303 double-strand break repair via nonhomologous end joining | GO:0006310 DNA recombination | GO:0006974 cellular response to DNA damage stimulus | GO:0008283 cell population proliferati…	GO:0000784 nuclear chromosome, telomeric region | GO:0005634 nucleus | GO:0005654 nucleoplasm | GO:0005694 chromosome | GO:0005737 cytoplasm | GO:0005886 plasma membrane | GO:0032991 protein-containing complex | GO:0032993 protein-DNA complex | GO:0043564 Ku70:Ku80 complex | GO:0070419 nonhomologous end joining complex | GO:0090734 site of DNA damage | GO:1990904 ribonucleoprotein complex	GO:0000166 nucleotide binding | GO:0003677 DNA binding | GO:0003678 DNA helicase activity | GO:0003684 damaged DNA binding | GO:0003690 double-stranded DNA binding | GO:0003691 double-stranded telomeric DNA binding | GO:0003723 RNA binding | GO:0004386 helicase activity | GO:0005515 protein binding | GO:0005524 ATP binding | GO:0008022 protein C-terminus binding | GO:0016787 hydrolase activity | …	mmu03450 Non-homologous end-joining	-13.4744	0.083629	1.12685	1	0.083629	1.12685	0.0772218	0.0900363	79	6	6
LOC105243954	#N/A	chr1	72413065..72421263	8199	8.199	0	105243954	-	-	-	-	-	-7.60435	0.00539186	0.0410016		0.00539186	0.0410016	0	0.0107837	8	0	2
March4	protein_coding	chr1	complement(72427112..72536564)	109453	4.541	8	381270	membrane-associated ring finger (C3HC4) 4	-	GO:0005794 Golgi apparatus | GO:0005795 Golgi stack | GO:0005802 trans-Golgi network | GO:0016020 membrane | GO:0016021 integral component of membrane	GO:0004842 ubiquitin-protein transferase activity | GO:0008270 zinc ion binding | GO:0016740 transferase activity | GO:0046872 metal ion binding	-	2.20453	0.0612008	0.0277614		0.0612008	0.0277614	0.025049	0.0973526	3	3	10
Gm15843	processed_pseudogene	chr1	72459464..72460041	578	0.578	0	100416317	predicted gene 15843	-	-	-	-	38242.1	0.0382421	0.001		0.0382421	0	0	0.0764841	0	0	1
Smarcal1	protein_coding	chr1	72536687..72636790	100104	7.859	27	54380	SWI/SNF related matrix associated, actin dependent regulator of chromatin, subfamily a-like 1	GO:0006259 DNA metabolic process | GO:0006281 DNA repair | GO:0006303 double-strand break repair via nonhomologous end joining | GO:0006357 regulation of transcription by RNA polymerase II | GO:0006974 cellular response to DNA damage stimulus | GO:0031297 replication fork processing | GO:0036292 DNA rewinding | GO:0048478 replication fork protection	GO:0005634 nucleus | GO:0005662 DNA replication factor A complex | GO:0035861 site of double-strand break | GO:0043596 nuclear replication fork	GO:0000166 nucleotide binding | GO:0003678 DNA helicase activity | GO:0004386 helicase activity | GO:0005524 ATP binding | GO:0008094 DNA-dependent ATPase activity | GO:0016787 hydrolase activity | GO:0036310 annealing helicase activity	-	1.16857	0.631075	0.540039		0.631075	0.540039	0.834642	0.427509	101	173	76
LOC105243955	#N/A	chr1	72642184..72642976	793	0.793	0	105243955	-	-	-	-	-	1	0.001	0.001		0	0	0	0	0	0	0
Ankar	protein_coding	chr1	complement(72642980..72700579)	57600	4.59	30	319695	ankyrin and armadillo repeat containing	-	GO:0016020 membrane | GO:0016021 integral component of membrane	-	-	1	0.001	0.001		0	0	0	0	0	0	0
Gm18035	processed_pseudogene	chr1	72692872..72693454	583	0.583	0	100416318	predicted gene, 18035	-	-	-	-	1	0.001	0.001		0	0	0	0	0	0	0
Rpl37a	protein_coding	chr1	72711260..72713813	2554	0.588	4	19981	ribosomal protein L37a	GO:0006412 translation	GO:0005622 intracellular | GO:0005840 ribosome | GO:0022625 cytosolic large ribosomal subunit	GO:0003735 structural constituent of ribosome | GO:0046872 metal ion binding | GO:0070180 large ribosomal subunit rRNA binding	mmu03010 Ribosome	-1.75649	64.8539	113.915	1	64.8539	113.915	78.7335	50.9743	1594	1221	678
LOC105243956	#N/A	chr1	complement(72726973..72737799)	10827	10.827	0	105243956	-	-	-	-	-	-7.82715	0.00991721	0.0776235		0.00991721	0.0776235	0.00350198	0.0163324	20	1	4
Gm30788	#N/A	chr1	complement(72744533..72770481)	25949	25.949	0	102632811	-	-	-	-	-	3.98352	0.00645086	0.00161939		0.00645086	0.00161939	0.00438351	0.00851821	1	3	5
Gm30847	#N/A	chr1	72765954..72821772	55819	55.819	0	102632888	-	-	-	-	-	-1.34568	0.0195801	0.0263486		0.0195801	0.0263486	0.0217365	0.0174237	35	32	22
Igfbp2	protein_coding	chr1	72824480..72852474	27995	1.478	5	16008	insulin-like growth factor binding protein 2	GO:0040008 regulation of growth | GO:0042104 positive regulation of activated T cell proliferation | GO:0043567 regulation of insulin-like growth factor receptor signaling pathway	GO:0005576 extracellular region | GO:0005615 extracellular space | GO:0016324 apical plasma membrane | GO:0031410 cytoplasmic vesicle	GO:0005520 insulin-like growth factor binding | GO:0019838 growth factor binding | GO:0031994 insulin-like growth factor I binding | GO:0031995 insulin-like growth factor II binding	-	-216.724	0.0299106	6.48234	1	0.0299106	6.48234	0	0.0598212	228	0	2
Igfbp5	protein_coding	chr1	complement(72858065..72874865)	16801	5.854	4	16011	insulin-like growth factor binding protein 5	GO:0001558 regulation of cell growth | GO:0001649 osteoblast differentiation | GO:0007565 female pregnancy | GO:0014912 negative regulation of smooth muscle cell migration | GO:0017148 negative regulation of translation | GO:0030336 negative regulation of cell migration | GO:0031069 hair follicle morphogenesis | GO:0040008 regulation of growth | GO:0042593 glucose homeostasis | GO:0043567 regulat…	GO:0005576 extracellular region | GO:0005615 extracellular space | GO:0016942 insulin-like growth factor binding protein complex | GO:0042567 insulin-like growth factor ternary complex	GO:0001968 fibronectin binding | GO:0005520 insulin-like growth factor binding | GO:0019838 growth factor binding | GO:0031994 insulin-like growth factor I binding | GO:0031995 insulin-like growth factor II binding	-	-1.45807	0.0393849	0.057426		0.0393849	0.057426	0.0259077	0.0528621	8	4	7
Gm9551	#N/A	chr1	complement(72934100..72934963)	864	0.864	0	672187	predicted gene 9551	-	-	-	-	25583.2	0.0255832	0.001		0.0255832	0	0	0.0511665	0	0	1
Gm31047	#N/A	chr1	72936864..72952744	15881	15.881	0	102633145	-	-	-	-	-	3.83379	0.0101443	0.00264602		0.0101443	0.00264602	0.0119375	0.00835108	1	5	3
Gm17846	#N/A	chr1	complement(72956148..72957738)	1591	1.591	0	100415975	predicted gene, 17846	-	-	-	-	13893.1	0.0138931	0.001		0.0138931	0	0	0.0277862	0	0	1
Gm31137	#N/A	chr1	72984841..73006028	21188	21.188	0	102633273	-	-	-	-	-	2.33061	0.00924445	0.00396653		0.00924445	0.00396653	0.014316	0.00417291	2	8	2
Tnp1	protein_coding	chr1	complement(73015074..73015899)	826	0.427	2	21958	transition protein 1	GO:0006338 chromatin remodeling | GO:0007275 multicellular organism development | GO:0007283 spermatogenesis | GO:0007290 spermatid nucleus elongation | GO:0010954 positive regulation of protein processing | GO:0030154 cell differentiation | GO:0035093 spermatogenesis, exchange of chromosomal proteins	GO:0000786 nucleosome | GO:0000788 nuclear nucleosome | GO:0001673 male germ cell nucleus | GO:0005634 nucleus | GO:0005694 chromosome	GO:0003677 DNA binding	-	1	0.001	0.001		0	0	0	0	0	0	0
1700027A15Rik	lncRNA	chr1	73016036..73025508	9473	9.473	0	69449	RIKEN cDNA 1700027A15 gene	-	-	-	-	-2.85163	0.00466672	0.0133078		0.00466672	0.0133078	0	0.00933344	3	0	2
Gm31254	#N/A	chr1	complement(73138591..73140699)	2109	2.109	0	102633423	-	-	-	-	-	1	0.001	0.001		0	0	0	0	0	0	0
LOC105243957	#N/A	chr1	73140471..73309140	168670	168.67	0	105243957	-	-	-	-	-	1.982	0.0212327	0.0107128		0.0212327	0.0107128	0.00944132	0.0330242	43	42	126
Gm31197	#N/A	chr1	73140731..73148067	7337	7.337	0	102633352	-	-	-	-	-	1	0.001	0.001		0	0	0	0	0	0	0
Gm31344	#N/A	chr1	73361286..73379587	18302	18.302	0	102633545	-	-	-	-	-	-6.02011	0.00724639	0.0436241		0.00724639	0.0436241	0	0.0144928	19	0	6
Pinc	lncRNA	chr1	complement(73391385..73407569)	16185	16.185	0	723792	pregnancy induced noncoding RNA	GO:0030857 negative regulation of epithelial cell differentiation | GO:0030879 mammary gland development	GO:0005575 cellular_component	GO:0005515 protein binding	-	-31.0319	0.00234266	0.072697		0.00234266	0.072697	0.00468531	0	28	2	0
D530049I02Rik	lncRNA	chr1	73398968..73430779	31812	31.812	0	78718	RIKEN cDNA D530049I02 gene	-	-	-	-	4.20812	0.00555864	0.00132093		0.00555864	0.00132093	0	0.0111173	1	0	8
Gm9553	processed_pseudogene	chr1	73512046..73513017	972	0.972	0	672208	predicted gene 9553	-	-	-	-	1	0.001	0.001		0	0	0	0	0	0	0
LOC102633705	#N/A	chr1	complement(73522764..73529965)	7202	7.202	0	102633705	-	-	-	-	-	1.57804	0.00920741	0.00583469		0.00920741	0.00583469	0	0.0184148	1	0	3
6030407O03Rik	lncRNA	chr1	complement(73618381..73864466)	246086	246.086	0	109198	RIKEN cDNA 6030407O03 gene	-	-	-	-	1.66861	0.0467285	0.0280045		0.0467285	0.0280045	0.0268092	0.0666479	164	174	371
Gm29183	lncRNA	chr1	complement(73811331..73827081)	15751	15.751	0	102633781	-	-	-	-	-	1	0.001	0.001		0	0	0	0	0	0	0
Mir6351	miRNA	chr1	complement(73855477..73855575)	99	0.099	0	102465179	microRNA 6351	-	-	-	-	1	0.001	0.001		0	0	0	0	0	0	0
Tns1	protein_coding	chr1	complement(73910231..74124535)	214305	13.198	58	21961	tensin 1	GO:0007044 cell-substrate junction assembly | GO:0010761 fibroblast migration	GO:0005925 focal adhesion | GO:0030055 cell-substrate junction	GO:0003779 actin binding	-	-1.65253	0.431581	0.7132		0.431581	0.7132	0.652137	0.211024	224	227	63
LOC105243958	#N/A	chr1	74030940..74032927	1988	1.988	0	105243958	-	-	-	-	-	88949.4	0.0889494	0.001		0.0889494	0	0	0.177899	0	0	8
Gm31637	#N/A	chr1	74095284..74097049	1766	1.766	0	102633935	-	-	-	-	-	1	0.001	0.001		0	0	0	0	0	0	0
Rufy4	protein_coding	chr1	74124618..74148230	23613	3.355	23	435626	RUN and FYVE domain containing 4	GO:0000045 autophagosome assembly | GO:0006914 autophagy | GO:0016239 positive regulation of macroautophagy | GO:0071353 cellular response to interleukin-4	GO:0005776 autophagosome | GO:0031410 cytoplasmic vesicle	GO:0032266 phosphatidylinositol-3-phosphate binding | GO:0046872 metal ion binding	-	-10.7728	0.0395301	0.425851		0.0395301	0.425851	0	0.0790602	34	0	6
Cxcr2	protein_coding	chr1	74153994..74161246	7253	3.122	4	12765	chemokine (C-X-C motif) receptor 2	GO:0002438 acute inflammatory response to antigenic stimulus | GO:0002690 positive regulation of leukocyte chemotaxis | GO:0006935 chemotaxis | GO:0006955 immune response | GO:0006968 cellular defense response | GO:0007165 signal transduction | GO:0007166 cell surface receptor signaling pathway | GO:0007200 phospholipase C-activating G protein-coupled receptor signaling pathway | GO:0007204 posit…	GO:0005654 nucleoplasm | GO:0005886 plasma membrane | GO:0009897 external side of plasma membrane | GO:0009986 cell surface | GO:0015630 microtubule cytoskeleton | GO:0016020 membrane | GO:0016021 integral component of membrane | GO:0042629 mast cell granule | GO:0072686 mitotic spindle	GO:0004918 interleukin-8 receptor activity | GO:0004930 G protein-coupled receptor activity | GO:0004950 chemokine receptor activity | GO:0005515 protein binding | GO:0016493 C-C chemokine receptor activity | GO:0016494 C-X-C chemokine receptor activity | GO:0019956 chemokine binding | GO:0019957 C-C chemokine binding | GO:0019959 interleukin-8 binding	mmu04060 Cytokine-cytokine receptor interaction | mmu04062 Chemokine signaling pathway | mmu04072 Phospholipase D signaling pathway | mmu04144 Endocytosis	-11.5285	2.06886	23.8508	1	2.06886	23.8508	1.51809	2.61962	1772	125	185
Cxcr1	protein_coding	chr1	complement(74191785..74198144)	6360	3.91	9	227288	chemokine (C-X-C motif) receptor 1	GO:0006935 chemotaxis | GO:0006955 immune response | GO:0007165 signal transduction | GO:0007166 cell surface receptor signaling pathway | GO:0007204 positive regulation of cytosolic calcium ion concentration | GO:0019722 calcium-mediated signaling | GO:0030593 neutrophil chemotaxis | GO:0031623 receptor internalization | GO:0060326 cell chemotaxis	GO:0005886 plasma membrane | GO:0009897 external side of plasma membrane | GO:0016020 membrane | GO:0016021 integral component of membrane	GO:0004918 interleukin-8 receptor activity | GO:0004930 G protein-coupled receptor activity | GO:0016493 C-C chemokine receptor activity | GO:0016494 C-X-C chemokine receptor activity | GO:0019956 chemokine binding | GO:0019957 C-C chemokine binding | GO:0019959 interleukin-8 binding	mmu04060 Cytokine-cytokine receptor interaction | mmu04062 Chemokine signaling pathway | mmu04072 Phospholipase D signaling pathway | mmu04144 Endocytosis	-2.12827	0.0201989	0.0429887		0.0201989	0.0429887	0.0290915	0.0113064	4	3	1
Mir1928	miRNA	chr1	complement(74206554..74206620)	67	0.067	0	100316687	microRNA 1928	-	-	-	-	1	0.001	0.001		0	0	0	0	0	0	0
Gm31691	#N/A	chr1	complement(74208480..74215644)	7165	7.165	0	102634001	-	-	-	-	-	33068.1	0.0330681	0.001		0.0330681	0	0.0476264	0.0185099	0	9	3
Arpc2	protein_coding	chr1	74236504..74268213	31710	1.643	13	76709	actin related protein 2/3 complex, subunit 2	GO:0010592 positive regulation of lamellipodium assembly | GO:0014911 positive regulation of smooth muscle cell migration | GO:0030041 actin filament polymerization | GO:0030833 regulation of actin filament polymerization | GO:0030838 positive regulation of actin filament polymerization | GO:0034314 Arp2/3 complex-mediated actin nucleation | GO:0036120 cellular response to platelet-derived growth…	GO:0005634 nucleus | GO:0005737 cytoplasm | GO:0005768 endosome | GO:0005856 cytoskeleton | GO:0005885 Arp2/3 protein complex | GO:0005886 plasma membrane | GO:0005925 focal adhesion | GO:0009986 cell surface | GO:0015629 actin cytoskeleton | GO:0030027 lamellipodium | GO:0030054 cell junction | GO:0030141 secretory granule | GO:0030426 growth cone | GO:0031252 cell leading edge | GO:0031941 fila…	GO:0003779 actin binding | GO:0005200 structural constituent of cytoskeleton | GO:0005515 protein binding | GO:0035254 glutamate receptor binding | GO:0044877 protein-containing complex binding | GO:0051015 actin filament binding | GO:0051117 ATPase binding	mmu04144 Endocytosis | mmu04666 Fc gamma R-mediated phagocytosis | mmu04810 Regulation of actin cytoskeleton | mmu05100 Bacterial invasion of epithelial cells | mmu05132 Salmonella infection	-1.78777	62.7754	112.228	1	62.7754	112.228	68.0778	57.4729	4388	2950	2136
Gpbar1	protein_coding	chr1	74278600..74279589	990	0.99	1	227289	G protein-coupled bile acid receptor 1	GO:0007165 signal transduction | GO:0007186 G protein-coupled receptor signaling pathway | GO:0038184 cell surface bile acid receptor signaling pathway | GO:0070374 positive regulation of ERK1 and ERK2 cascade | GO:1903413 cellular response to bile acid | GO:1904056 positive regulation of cholangiocyte proliferation | GO:2000810 regulation of bicellular tight junction assembly	GO:0005737 cytoplasm | GO:0005886 plasma membrane | GO:0016020 membrane | GO:0016021 integral component of membrane | GO:0043235 receptor complex	GO:0004930 G protein-coupled receptor activity | GO:0038181 bile acid receptor activity | GO:0038182 G protein-coupled bile acid receptor activity	-	-169784	0.001	0.169784		0	0.169784	0	0	4	0	0
Aamp	protein_coding	chr1	complement(74279840..74284738)	4899	2.117	14	227290	angio-associated migratory protein	-	GO:0005829 cytosol | GO:0009986 cell surface | GO:0015630 microtubule cytoskeleton | GO:0045171 intercellular bridge	GO:0008201 heparin binding	-	-2.4323	7.58956	18.4601	1	7.58956	18.4601	10.7103	4.46881	930	598	214
Pnkd	protein_coding	chr1	74284597..74353692	69096	3.632	14	56695	paroxysmal nonkinesiogenic dyskinesia	GO:0019243 methylglyoxal catabolic process to D-lactate via S-lactoyl-glutathione | GO:0032225 regulation of synaptic transmission, dopaminergic | GO:0042053 regulation of dopamine metabolic process | GO:0046929 negative regulation of neurotransmitter secretion | GO:0050884 neuromuscular process controlling posture	GO:0005634 nucleus | GO:0005737 cytoplasm | GO:0005739 mitochondrion | GO:0016020 membrane	GO:0004416 hydroxyacylglutathione hydrolase activity | GO:0005515 protein binding | GO:0016787 hydrolase activity | GO:0046872 metal ion binding	-	-1.18466	0.849673	1.00657	1	0.849673	1.00657	0.835152	0.864195	87	80	71
Tmbim1	protein_coding	chr1	complement(74288247..74304336)	16090	3.639	14	69660	transmembrane BAX inhibitor motif containing 1	GO:0043086 negative regulation of catalytic activity | GO:1902042 negative regulation of extrinsic apoptotic signaling pathway via death domain receptors | GO:1902045 negative regulation of Fas signaling pathway | GO:1903077 negative regulation of protein localization to plasma membrane | GO:2000504 positive regulation of blood vessel remodeling	GO:0005764 lysosome | GO:0005765 lysosomal membrane | GO:0005768 endosome | GO:0005794 Golgi apparatus | GO:0010008 endosome membrane | GO:0016020 membrane | GO:0016021 integral component of membrane | GO:0043231 intracellular membrane-bounded organelle	GO:0005123 death receptor binding	-	-2.00654	7.04979	14.1457	1	7.04979	14.1457	9.32529	4.7743	1225	895	393
Catip	protein_coding	chr1	74362108..74369323	7216	2.445	18	241112	ciliogenesis associated TTC17 interacting protein	GO:0030030 cell projection organization | GO:0030041 actin filament polymerization | GO:0044782 cilium organization	GO:0005634 nucleus | GO:0005737 cytoplasm | GO:0005856 cytoskeleton | GO:0005886 plasma membrane | GO:0016020 membrane	GO:0003674 molecular_function	-	1.57804	0.0271214	0.0171867		0.0271214	0.0171867	0	0.0542427	1	0	3
Slc11a1	protein_coding	chr1	74375014..74386057	11044	2.573	19	18173	solute carrier family 11 (proton-coupled divalent metal ion transporters), member 1	GO:0000165 MAPK cascade | GO:0001818 negative regulation of cytokine production | GO:0001819 positive regulation of cytokine production | GO:0002309 T cell proliferation involved in immune response | GO:0002369 T cell cytokine production | GO:0002606 positive regulation of dendritic cell antigen processing and presentation | GO:0002827 positive regulation of T-helper 1 type immune response | GO:0…	GO:0005764 lysosome | GO:0005770 late endosome | GO:0005886 plasma membrane | GO:0009986 cell surface | GO:0010008 endosome membrane | GO:0016020 membrane | GO:0016021 integral component of membrane | GO:0030670 phagocytic vesicle membrane | GO:0070821 tertiary granule membrane	GO:0005381 iron ion transmembrane transporter activity | GO:0005384 manganese ion transmembrane transporter activity | GO:0015086 cadmium ion transmembrane transporter activity | GO:0042803 protein homodimerization activity | GO:0046873 metal ion transmembrane transporter activity | GO:0046915 transition metal ion transmembrane transporter activity | GO:0051139 metal ion:proton antiporter activity	mmu04142 Lysosome | mmu04978 Mineral absorption	-1.98203	52.9578	104.964	1	52.9578	104.964	70.5563	35.3594	6427	4788	2058
Ctdsp1	protein_coding	chr1	74391609..74397285	5677	2.776	7	227292	CTD (carboxy-terminal domain, RNA polymerase II, polypeptide A) small phosphatase 1	GO:0001933 negative regulation of protein phosphorylation | GO:0006357 regulation of transcription by RNA polymerase II | GO:0006470 protein dephosphorylation | GO:0045665 negative regulation of neuron differentiation | GO:0050768 negative regulation of neurogenesis | GO:2000134 negative regulation of G1/S transition of mitotic cell cycle	GO:0005634 nucleus | GO:0005654 nucleoplasm	GO:0004721 phosphoprotein phosphatase activity | GO:0005515 protein binding | GO:0008420 RNA polymerase II CTD heptapeptide repeat phosphatase activity | GO:0016787 hydrolase activity | GO:0016791 phosphatase activity | GO:0046872 metal ion binding	-	-1.08431	4.27189	4.63205	1	4.27189	4.63205	5.51802	3.02575	306	404	190
Mir26b	miRNA	chr1	74394310..74394394	85	0.085	0	387219	microRNA 26b	GO:0001933 negative regulation of protein phosphorylation | GO:0009611 response to wounding | GO:0009617 response to bacterium | GO:0035195 gene silencing by miRNA | GO:0060291 long-term synaptic potentiation | GO:0070482 response to oxygen levels | GO:0071222 cellular response to lipopolysaccharide | GO:0071363 cellular response to growth factor stimulus | GO:2000134 negative regulation of G1/S …	GO:0016442 RISC complex | GO:0070062 extracellular exosome	-	mmu05206 MicroRNAs in cancer	1	0.001	0.001		0	0	0	0	0	0	0
Vil1	protein_coding	chr1	74409191..74435560	26370	3.392	23	22349	villin 1	GO:0001951 intestinal D-glucose absorption | GO:0006915 apoptotic process | GO:0007010 cytoskeleton organization | GO:0007173 epidermal growth factor receptor signaling pathway | GO:0008360 regulation of cell shape | GO:0009617 response to bacterium | GO:0010634 positive regulation of epithelial cell migration | GO:0030033 microvillus assembly | GO:0030041 actin filament polymerization | GO:00300…	GO:0001726 ruffle | GO:0005737 cytoplasm | GO:0005856 cytoskeleton | GO:0005886 plasma membrane | GO:0005902 microvillus | GO:0005903 brush border | GO:0030027 lamellipodium | GO:0030175 filopodium | GO:0032432 actin filament bundle | GO:0032433 filopodium tip | GO:0042995 cell projection	GO:0003779 actin binding | GO:0005509 calcium ion binding | GO:0005515 protein binding | GO:0005546 phosphatidylinositol-4,5-bisphosphate binding | GO:0035727 lysophosphatidic acid binding | GO:0042802 identical protein binding | GO:0042803 protein homodimerization activity | GO:0043027 cysteine-type endopeptidase inhibitor activity involved in apoptotic process | GO:0046872 metal ion binding | G…	-	-2.21656	0.00558902	0.0123884		0.00558902	0.0123884	0.011178	0	1	1	0
Usp37	protein_coding	chr1	complement(74435510..74544286)	108777	7.452	29	319651	ubiquitin specific peptidase 37	GO:0000082 G1/S transition of mitotic cell cycle | GO:0006275 regulation of DNA replication | GO:0006511 ubiquitin-dependent protein catabolic process | GO:0007049 cell cycle | GO:0016579 protein deubiquitination | GO:0035871 protein K11-linked deubiquitination | GO:0051301 cell division | GO:0071108 protein K48-linked deubiquitination	GO:0005634 nucleus	GO:0004197 cysteine-type endopeptidase activity | GO:0004843 thiol-dependent ubiquitin-specific protease activity | GO:0008233 peptidase activity | GO:0008234 cysteine-type peptidase activity | GO:0016787 hydrolase activity | GO:0019901 protein kinase binding | GO:0036459 thiol-dependent ubiquitinyl hydrolase activity	-	1.41479	0.718012	0.507506		0.718012	0.507506	0.64109	0.794934	90	126	134
Rqcd1	#N/A	chr1	74506040..74530842	24803	3.286	9	58184	rcd1 (required for cell differentiation) homolog 1 (S. pombe)	GO:0006402 mRNA catabolic process | GO:0006417 regulation of translation | GO:0017148 negative regulation of translation | GO:0019221 cytokine-mediated signaling pathway | GO:0031047 gene silencing by RNA | GO:0033138 positive regulation of peptidyl-serine phosphorylation | GO:0033147 negative regulation of intracellular estrogen receptor signaling pathway | GO:0045742 positive regulation of epid…	GO:0000932 P-body | GO:0005634 nucleus | GO:0005737 cytoplasm | GO:0030014 CCR4-NOT complex | GO:0030015 CCR4-NOT core complex | GO:0032991 protein-containing complex	GO:0005154 epidermal growth factor receptor binding | GO:0005515 protein binding | GO:0019900 kinase binding | GO:0019904 protein domain specific binding | GO:0042803 protein homodimerization activity	mmu03018 RNA degradation	-1.08473	3.76074	4.07938	1	3.76074	4.07938	4.77699	2.74449	319	414	204
Plcd4	protein_coding	chr1	74541972..74565977	24006	4.212	30	18802	phospholipase C, delta 4	GO:0006629 lipid metabolic process | GO:0007165 signal transduction | GO:0007264 small GTPase mediated signal transduction | GO:0007340 acrosome reaction | GO:0016042 lipid catabolic process | GO:0032959 inositol trisphosphate biosynthetic process | GO:0035556 intracellular signal transduction | GO:0046488 phosphatidylinositol metabolic process | GO:0048015 phosphatidylinositol-mediated signaling…	GO:0005622 intracellular | GO:0005634 nucleus | GO:0005737 cytoplasm | GO:0005783 endoplasmic reticulum | GO:0005829 cytosol | GO:0005886 plasma membrane | GO:0016020 membrane | GO:0031965 nuclear membrane	GO:0001965 G-protein alpha-subunit binding | GO:0004435 phosphatidylinositol phospholipase C activity | GO:0004629 phospholipase C activity | GO:0005085 guanyl-nucleotide exchange factor activity | GO:0005509 calcium ion binding | GO:0008081 phosphoric diester hydrolase activity | GO:0016787 hydrolase activity | GO:0046872 metal ion binding	mmu00562 Inositol phosphate metabolism | mmu01100 Metabolic pathways | mmu04020 Calcium signaling pathway | mmu04070 Phosphatidylinositol signaling system | mmu04919 Thyroid hormone signaling pathway	-22.813	0.00524784	0.119719		0.00524784	0.119719	0	0.0104957	12	0	1
Zfp142	protein_coding	chr1	complement(74565128..74588211)	23084	8.847	18	77264	zinc finger protein 142	GO:0010468 regulation of gene expression | GO:0031060 regulation of histone methylation	GO:0005634 nucleus | GO:0035097 histone methyltransferase complex	GO:0000979 RNA polymerase II core promoter sequence-specific DNA binding | GO:0003676 nucleic acid binding | GO:0003677 DNA binding | GO:0046872 metal ion binding	-	1.51805	0.814778	0.536727		0.814778	0.536727	0.900004	0.729552	113	210	146
Bcs1l	protein_coding	chr1	74588294..74592443	4150	1.896	10	66821	BCS1-like (yeast)	GO:0007005 mitochondrion organization | GO:0032981 mitochondrial respiratory chain complex I assembly | GO:0033617 mitochondrial respiratory chain complex IV assembly | GO:0034551 mitochondrial respiratory chain complex III assembly	GO:0005739 mitochondrion | GO:0005743 mitochondrial inner membrane | GO:0016020 membrane | GO:0016021 integral component of membrane	GO:0000166 nucleotide binding | GO:0005524 ATP binding	-	1.17762	0.626397	0.531917		0.626397	0.531917	0.599935	0.652858	24	30	28
Rnf25	protein_coding	chr1	complement(74593748..74601431)	7684	2.294	14	57751	ring finger protein 25	GO:0016567 protein ubiquitination | GO:0051092 positive regulation of NF-kappaB transcription factor activity	GO:0005634 nucleus | GO:0005829 cytosol	GO:0004842 ubiquitin-protein transferase activity | GO:0005515 protein binding | GO:0016740 transferase activity | GO:0046872 metal ion binding | GO:0051059 NF-kappaB binding | GO:0061630 ubiquitin protein ligase activity	-	-4.53064	1.15229	5.22063	1	1.15229	5.22063	0.512377	1.79221	285	31	93
Stk36	protein_coding	chr1	74601450..74636894	35445	5.496	31	269209	serine/threonine kinase 36	GO:0003351 epithelial cilium movement involved in extracellular fluid movement | GO:0006468 protein phosphorylation | GO:0007228 positive regulation of hh target transcription factor activity | GO:0007275 multicellular organism development | GO:0007420 brain development | GO:0009791 post-embryonic development | GO:0016310 phosphorylation | GO:0030030 cell projection organization | GO:0045880 posi…	GO:0005634 nucleus | GO:0005737 cytoplasm | GO:0005829 cytosol	GO:0000166 nucleotide binding | GO:0004672 protein kinase activity | GO:0004674 protein serine/threonine kinase activity | GO:0005515 protein binding | GO:0005524 ATP binding | GO:0008134 transcription factor binding | GO:0016301 kinase activity | GO:0016740 transferase activity | GO:0046872 metal ion binding	mmu04340 Hedgehog signaling pathway | mmu05200 Pathways in cancer | mmu05217 Basal cell carcinoma	17819.5	0.0178195	0.001		0.0178195	0	0.0275953	0.00804364	0	4	1
Ttll4	protein_coding	chr1	74661645..74701832	40188	8.333	23	67534	tubulin tyrosine ligase-like family, member 4	GO:0006464 cellular protein modification process | GO:0018095 protein polyglutamylation | GO:0018200 peptidyl-glutamic acid modification	GO:0005737 cytoplasm | GO:0005856 cytoskeleton | GO:0005874 microtubule | GO:0005929 cilium | GO:0036064 ciliary basal body | GO:0042995 cell projection | GO:0097731 9+0 non-motile cilium	GO:0000166 nucleotide binding | GO:0005515 protein binding | GO:0005524 ATP binding | GO:0015631 tubulin binding | GO:0016874 ligase activity | GO:0070739 protein-glutamic acid ligase activity	-	-2.35143	0.651946	1.533	1	0.651946	1.533	0.550561	0.753332	304	121	142
Cyp27a1	protein_coding	chr1	74713146..74737896	24751	2.324	11	104086	cytochrome P450, family 27, subfamily a, polypeptide 1	GO:0006629 lipid metabolic process | GO:0006694 steroid biosynthetic process | GO:0006699 bile acid biosynthetic process | GO:0006707 cholesterol catabolic process | GO:0008202 steroid metabolic process | GO:0008203 cholesterol metabolic process | GO:0036378 calcitriol biosynthetic process from calciol | GO:0055114 oxidation-reduction process	GO:0005739 mitochondrion | GO:0005740 mitochondrial envelope | GO:0005743 mitochondrial inner membrane | GO:0016020 membrane	GO:0004497 monooxygenase activity | GO:0005506 iron ion binding | GO:0016491 oxidoreductase activity | GO:0016705 oxidoreductase activity, acting on paired donors, with incorporation or reduction of molecular oxygen | GO:0020037 heme binding | GO:0030343 vitamin D3 25-hydroxylase activity | GO:0030544 Hsp70 protein binding | GO:0031073 cholesterol 26-hydroxylase activity | GO:0046872 metal ion bi…	mmu00120 Primary bile acid biosynthesis | mmu01100 Metabolic pathways | mmu03320 PPAR signaling pathway	2.32019	2.18154	0.940239	1	2.18154	0.940239	2.47987	1.88321	52	152	99
Prkag3	protein_coding	chr1	complement(74738922..74749590)	10669	3.153	17	241113	protein kinase, AMP-activated, gamma 3 non-catatlytic subunit	GO:0005978 glycogen biosynthetic process | GO:0006096 glycolytic process | GO:0006629 lipid metabolic process | GO:0006631 fatty acid metabolic process | GO:0006633 fatty acid biosynthetic process | GO:0014873 response to muscle activity involved in regulation of muscle adaptation | GO:0071900 regulation of protein serine/threonine kinase activity	GO:0031588 nucleotide-activated protein kinase complex	GO:0000166 nucleotide binding | GO:0004679 AMP-activated protein kinase activity | GO:0005524 ATP binding | GO:0019901 protein kinase binding | GO:0032559 adenyl ribonucleotide binding	mmu04068 FoxO signaling pathway | mmu04152 AMPK signaling pathway | mmu04710 Circadian rhythm | mmu04910 Insulin signaling pathway | mmu04920 Adipocytokine signaling pathway | mmu04921 Oxytocin signaling pathway | mmu04922 Glucagon signaling pathway | mmu04931 Insulin resistance | mmu04932 Non-alcoholic fatty liver disease (NAFLD) | mmu05410 Hypertrophic cardiomyopathy (HCM)	4.05839	0.054088	0.0133275		0.054088	0.0133275	0.0240507	0.0841253	1	2	6
Wnt6	protein_coding	chr1	74754344..74785322	30979	2.308	10	22420	wingless-type MMTV integration site family, member 6	GO:0001658 branching involved in ureteric bud morphogenesis | GO:0007165 signal transduction | GO:0007267 cell-cell signaling | GO:0007275 multicellular organism development | GO:0009798 axis specification | GO:0009887 animal organ morphogenesis | GO:0010628 positive regulation of gene expression | GO:0016055 Wnt signaling pathway | GO:0030182 neuron differentiation | GO:0042475 odontogenesis of …	GO:0005576 extracellular region | GO:0005615 extracellular space | GO:0009986 cell surface | GO:0031012 extracellular matrix	GO:0005102 signaling receptor binding | GO:0005109 frizzled binding | GO:0005515 protein binding	mmu04310 Wnt signaling pathway | mmu04340 Hedgehog signaling pathway | mmu04390 Hippo signaling pathway | mmu04550 Signaling pathways regulating pluripotency of stem cells | mmu04916 Melanogenesis | mmu05166 HTLV-I infection | mmu05200 Pathways in cancer | mmu05205 Proteoglycans in cancer | mmu05217 Basal cell carcinoma	1	0.001	0.001		0	0	0	0	0	0	0
Gm29539	lncRNA	chr1	complement(74775082..74778855)	3774	3.774	0	102634275	-	-	-	-	-	15903.5	0.0159035	0.001		0.0159035	0	0.0200932	0.0117138	0	2	1
Gm32099	#N/A	chr1	complement(74787169..74795333)	8165	8.165	0	102634545	-	-	-	-	-	1.89545	0.0877949	0.0463188		0.0877949	0.0463188	0.0185748	0.157015	9	4	29
Wnt10a	protein_coding	chr1	74792019..74804176	12158	1.962	4	22409	wingless-type MMTV integration site family, member 10A	GO:0001942 hair follicle development | GO:0007165 signal transduction | GO:0007267 cell-cell signaling | GO:0007275 multicellular organism development | GO:0009887 animal organ morphogenesis | GO:0010628 positive regulation of gene expression | GO:0014033 neural crest cell differentiation | GO:0016055 Wnt signaling pathway | GO:0030182 neuron differentiation | GO:0031069 hair follicle morphogenes…	GO:0005576 extracellular region | GO:0005615 extracellular space	GO:0005102 signaling receptor binding | GO:0005109 frizzled binding | GO:0048018 receptor ligand activity	mmu04310 Wnt signaling pathway | mmu04340 Hedgehog signaling pathway | mmu04390 Hippo signaling pathway | mmu04550 Signaling pathways regulating pluripotency of stem cells | mmu04916 Melanogenesis | mmu05166 HTLV-I infection | mmu05200 Pathways in cancer | mmu05205 Proteoglycans in cancer | mmu05217 Basal cell carcinoma	11266	0.011266	0.001		0.011266	0	0	0.022532	0	0	1
n-Tg11	#N/A	chr1	complement(74816747..74816817)	71	0.071	0	102467310	Derived by automated computational analysis using gene prediction method: tRNAscan-SE.	GO:0008150 biological_process	GO:0005575 cellular_component	GO:0003674 molecular_function	-	-1.47842	1.20098	1.77556	1	1.20098	1.77556	0.534027	1.86794	3	1	3
Gm32275	#N/A	chr1	complement(74820813..74843532)	22720	22.72	0	102634772	-	-	-	-	-	3.28282	0.0182151	0.00554861		0.0182151	0.00554861	0.0267013	0.00972884	3	16	5
Gm16582	lncRNA	chr1	74849742..74879953	30212	30.212	0	102634844	-	-	-	-	-	3.28527	0.031986	0.00973621		0.031986	0.00973621	0.011295	0.0526771	7	9	36
Cdk5r2	protein_coding	chr1	74855029..74857732	2704	2.704	1	12570	cyclin-dependent kinase 5, regulatory subunit 2 (p39)	GO:0001764 neuron migration | GO:0021549 cerebellum development | GO:0021722 superior olivary nucleus maturation | GO:0021766 hippocampus development | GO:0021819 layer formation in cerebral cortex | GO:0032147 activation of protein kinase activity | GO:0045737 positive regulation of cyclin-dependent protein serine/threonine kinase activity | GO:0045860 positive regulation of protein kinase activ…	GO:0005737 cytoplasm | GO:0005886 plasma membrane | GO:0016020 membrane | GO:0016533 protein kinase 5 complex | GO:0030426 growth cone | GO:0043005 neuron projection	GO:0003779 actin binding | GO:0008092 cytoskeletal protein binding | GO:0008289 lipid binding | GO:0061575 cyclin-dependent protein serine/threonine kinase activator activity	-	1.04382	0.291986	0.279729		0.291986	0.279729	0.126199	0.457773	18	9	28
Fev	protein_coding	chr1	complement(74881509..74885408)	3900	1.479	3	260298	FEV (ETS oncogene family)	GO:0006355 regulation of transcription, DNA-templated | GO:0006357 regulation of transcription by RNA polymerase II | GO:0007275 multicellular organism development | GO:0007399 nervous system development | GO:0010628 positive regulation of gene expression | GO:0030154 cell differentiation | GO:0042551 neuron maturation | GO:0045893 positive regulation of transcription, DNA-templated | GO:0045944 …	GO:0005634 nucleus | GO:0016607 nuclear speck | GO:0043025 neuronal cell body	GO:0000978 RNA polymerase II cis-regulatory region sequence-specific DNA binding | GO:0000981 DNA-binding transcription factor activity, RNA polymerase II-specific | GO:0001228 DNA-binding transcription activator activity, RNA polymerase II-specific | GO:0003677 DNA binding | GO:0003690 double-stranded DNA binding | GO:0003700 DNA-binding transcription factor activity | GO:0043565 sequence-specif…	mmu05202 Transcriptional misregulation in cancer	1.2776	0.0725988	0.0568242		0.0725988	0.0568242	0.0256362	0.119561	2	1	4
Cryba2	protein_coding	chr1	complement(74889934..74898843)	8910	0.99	11	12958	crystallin, beta A2	GO:0002088 lens development in camera-type eye | GO:0007601 visual perception	-	GO:0005212 structural constituent of eye lens | GO:0042802 identical protein binding	-	1	0.001	0.001		0	0	0	0	0	0	0
Mir375	miRNA	chr1	complement(74900658..74900721)	64	0.064	0	723900	microRNA 375	GO:0003323 type B pancreatic cell development	-	-	mmu05206 MicroRNAs in cancer	1	0.001	0.001		0	0	0	0	0	0	0
Ccdc108	#N/A	chr1	complement(74902071..74935628)	33558	6.574	44	241116	coiled-coil domain containing 108	GO:0008150 biological_process	GO:0005575 cellular_component | GO:0005886 plasma membrane | GO:0005929 cilium | GO:0016020 membrane | GO:0016021 integral component of membrane | GO:0031514 motile cilium | GO:0042995 cell projection	-	-	-87.45	0.00336232	0.294035		0.00336232	0.294035	0	0.00672465	46	0	1
Ihh	protein_coding	chr1	complement(74945318..74951651)	6334	2.444	3	16147	Indian hedgehog	GO:0001501 skeletal system development | GO:0001503 ossification | GO:0001569 branching involved in blood vessel morphogenesis | GO:0001649 osteoblast differentiation | GO:0001701 in utero embryonic development | GO:0001708 cell fate specification | GO:0001763 morphogenesis of a branching structure | GO:0001944 vasculature development | GO:0001947 heart looping | GO:0002053 positive regulation of…	GO:0005576 extracellular region | GO:0005615 extracellular space | GO:0005886 plasma membrane | GO:0016020 membrane | GO:0031012 extracellular matrix	GO:0005113 patched binding | GO:0005509 calcium ion binding | GO:0005515 protein binding | GO:0008233 peptidase activity | GO:0016787 hydrolase activity | GO:0046872 metal ion binding	mmu04340 Hedgehog signaling pathway	2.33061	0.0400719	0.0171937		0.0400719	0.0171937	0.0620555	0.0180883	1	4	1
Nhej1	protein_coding	chr1	complement(74967346..75046653)	79308	0.86	5	75570	nonhomologous end-joining factor 1	GO:0006281 DNA repair | GO:0006302 double-strand break repair | GO:0006303 double-strand break repair via nonhomologous end joining | GO:0006974 cellular response to DNA damage stimulus | GO:0010212 response to ionizing radiation | GO:0030183 B cell differentiation | GO:0030217 T cell differentiation	GO:0001650 fibrillar center | GO:0005634 nucleus | GO:0005654 nucleoplasm | GO:0032807 DNA ligase IV complex | GO:0070419 nonhomologous end joining complex	GO:0003677 DNA binding | GO:0045027 DNA end binding	mmu03450 Non-homologous end-joining	1.41871	0.55457	0.390897		0.55457	0.390897	0.440882	0.668258	8	10	13
Slc23a3	protein_coding	chr1	complement(75125541..75135223)	9683	3.396	15	22626	solute carrier family 23 (nucleobase transporters), member 3	GO:0008150 biological_process | GO:0055085 transmembrane transport	GO:0005575 cellular_component | GO:0005737 cytoplasm | GO:0016020 membrane | GO:0016021 integral component of membrane	GO:0005215 transporter activity | GO:0022857 transmembrane transporter activity	-	-1.08576	0.0455858	0.0494953		0.0455858	0.0494953	0.0781541	0.0130176	4	7	1
Cnppd1	protein_coding	chr1	complement(75135215..75142733)	7519	3.373	15	69171	cyclin Pas1/PHO80 domain containing 1	GO:0000079 regulation of cyclin-dependent protein serine/threonine kinase activity | GO:0008150 biological_process	GO:0005575 cellular_component | GO:0016020 membrane | GO:0016021 integral component of membrane	GO:0003674 molecular_function | GO:0019901 protein kinase binding	-	-1.4843	6.11873	9.08202	1	6.11873	9.08202	5.78911	6.44834	729	515	492
Fam134a	#N/A	chr1	75142786..75147909	5124	2.557	12	227298	family with sequence similarity 134, member A	GO:0008150 biological_process	GO:0016020 membrane | GO:0016021 integral component of membrane	GO:0003674 molecular_function	-	-2.09893	7.07019	14.8398	1	7.07019	14.8398	8.76351	5.37686	903	591	311
Zfand2b	protein_coding	chr1	75168646..75171626	2981	1.299	12	68818	zinc finger, AN1 type domain 2B	GO:0006616 SRP-dependent cotranslational protein targeting to membrane, translocation | GO:0043161 proteasome-mediated ubiquitin-dependent protein catabolic process | GO:0043567 regulation of insulin-like growth factor receptor signaling pathway | GO:0045047 protein targeting to ER	GO:0000502 proteasome complex | GO:0005783 endoplasmic reticulum | GO:0016020 membrane | GO:0031225 anchored component of membrane	GO:0005515 protein binding | GO:0008270 zinc ion binding | GO:0031593 polyubiquitin modification-dependent protein binding | GO:0036435 K48-linked polyubiquitin modification-dependent protein binding | GO:0043130 ubiquitin binding | GO:0046872 metal ion binding	-	-2.1918	2.78948	6.11398	1	2.78948	6.11398	4.11558	1.46338	189	141	43
Abcb6	protein_coding	chr1	complement(75171640..75180283)	8644	2.934	21	74104	ATP-binding cassette, sub-family B (MDR/TAP), member 6	GO:0006779 porphyrin-containing compound biosynthetic process | GO:0006810 transport | GO:0007420 brain development | GO:0015886 heme transport | GO:0043588 skin development | GO:0055085 transmembrane transport	GO:0005654 nucleoplasm | GO:0005739 mitochondrion | GO:0005740 mitochondrial envelope | GO:0005741 mitochondrial outer membrane | GO:0005768 endosome | GO:0005774 vacuolar membrane | GO:0005783 endoplasmic reticulum | GO:0005794 Golgi apparatus | GO:0005829 cytosol | GO:0005886 plasma membrane | GO:0016020 membrane | GO:0016021 integral component of membrane | GO:0031307 integral component of mit…	GO:0000166 nucleotide binding | GO:0005524 ATP binding | GO:0015439 ATPase-coupled heme transmembrane transporter activity | GO:0015562 efflux transmembrane transporter activity | GO:0016887 ATPase activity | GO:0020037 heme binding | GO:0042626 ATPase-coupled transmembrane transporter activity	mmu02010 ABC transporters	1.09965	0.551229	0.501279		0.551229	0.501279	0.620301	0.482158	35	48	32
Atg9a	protein_coding	chr1	complement(75180861..75192010)	11150	4.399	21	245860	autophagy related 9A	GO:0000045 autophagosome assembly | GO:0000422 autophagy of mitochondrion | GO:0006914 autophagy | GO:0015031 protein transport | GO:0032688 negative regulation of interferon-beta production | GO:0034067 protein localization to Golgi apparatus | GO:0034497 protein localization to phagophore assembly site | GO:0044805 late nucleophagy | GO:0045087 innate immune response	GO:0000407 phagophore assembly site | GO:0000421 autophagosome membrane | GO:0005737 cytoplasm | GO:0005768 endosome | GO:0005770 late endosome | GO:0005776 autophagosome | GO:0005794 Golgi apparatus | GO:0005802 trans-Golgi network | GO:0008021 synaptic vesicle | GO:0016020 membrane | GO:0016021 integral component of membrane | GO:0031410 cytoplasmic vesicle | GO:0043231 intracellular membrane-b…	GO:0003674 molecular_function	-	1.14055	3.5409	3.10456	1	3.5409	3.10456	4.25789	2.82391	325	494	281
Ankzf1	protein_coding	chr1	75192160..75199387	7228	3.381	22	52231	ankyrin repeat and zinc finger domain containing 1	GO:0030433 ubiquitin-dependent ERAD pathway | GO:0070301 cellular response to hydrogen peroxide | GO:0071630 nuclear protein quality control by the ubiquitin-proteasome system | GO:0072671 mitochondria-associated ubiquitin-dependent protein catabolic process	GO:0005737 cytoplasm | GO:0036266 Cdc48p-Npl4p-Vms1p AAA ATPase complex	GO:0003676 nucleic acid binding | GO:0004843 thiol-dependent ubiquitin-specific protease activity | GO:0005515 protein binding | GO:0046872 metal ion binding	-	11.2768	0.840934	0.0745723		0.840934	0.0745723	1.21116	0.470713	6	108	36
Glb1l	protein_coding	chr1	complement(75198235..75210816)	12582	4.695	23	74577	galactosidase, beta 1-like	GO:0005975 carbohydrate metabolic process | GO:0008152 metabolic process	GO:0005576 extracellular region | GO:0005615 extracellular space | GO:0005773 vacuole	GO:0004553 hydrolase activity, hydrolyzing O-glycosyl compounds | GO:0004565 beta-galactosidase activity | GO:0016787 hydrolase activity | GO:0016798 hydrolase activity, acting on glycosyl bonds	-	-3.0174	0.68223	2.05856	1	0.68223	2.05856	0.799504	0.564956	230	99	60
Stk16	protein_coding	chr1	75210829..75215606	4778	2.991	12	20872	serine/threonine kinase 16	GO:0006468 protein phosphorylation | GO:0016310 phosphorylation | GO:0045944 positive regulation of transcription by RNA polymerase II | GO:0046777 protein autophosphorylation | GO:0071560 cellular response to transforming growth factor beta stimulus	GO:0005737 cytoplasm | GO:0005798 Golgi-associated vesicle | GO:0005829 cytosol | GO:0016020 membrane	GO:0000166 nucleotide binding | GO:0000978 RNA polymerase II cis-regulatory region sequence-specific DNA binding | GO:0004672 protein kinase activity | GO:0004674 protein serine/threonine kinase activity | GO:0004715 non-membrane spanning protein tyrosine kinase activity | GO:0005524 ATP binding | GO:0016301 kinase activity | GO:0016740 transferase activity	-	-3.8038	0.941841	3.58257	1	0.941841	3.58257	0.405653	1.47803	255	32	100
Tuba4a	protein_coding	chr1	complement(75214974..75219860)	4887	2.488	5	22145	tubulin, alpha 4A	GO:0000226 microtubule cytoskeleton organization | GO:0000278 mitotic cell cycle | GO:0007017 microtubule-based process	GO:0005737 cytoplasm | GO:0005856 cytoskeleton | GO:0005874 microtubule | GO:0015630 microtubule cytoskeleton	GO:0000166 nucleotide binding | GO:0003924 GTPase activity | GO:0005200 structural constituent of cytoskeleton | GO:0005515 protein binding | GO:0005525 GTP binding | GO:0019899 enzyme binding | GO:0019901 protein kinase binding	mmu04145 Phagosome | mmu04540 Gap junction	-2.3421	6.85077	16.0452	1	6.85077	16.0452	7.4826	6.21895	950	491	350
A630095N17Rik	protein_coding	chr1	complement(75219955..75232093)	12139	1.301	6	381272	RIKEN cDNA A630095N17 gene	GO:0008150 biological_process	GO:0005575 cellular_component	GO:0003674 molecular_function	-	31561.8	0.0315618	0.001		0.0315618	0	0.0291437	0.0339799	0	1	1
Dnajb2	protein_coding	chr1	75236403..75245692	9290	3.223	15	56812	DnaJ (Hsp40) homolog, subfamily B, member 2	GO:0008285 negative regulation of cell population proliferation | GO:0030308 negative regulation of cell growth | GO:0030433 ubiquitin-dependent ERAD pathway | GO:0031396 regulation of protein ubiquitination | GO:0031398 positive regulation of protein ubiquitination | GO:0032091 negative regulation of protein binding | GO:0032436 positive regulation of proteasomal ubiquitin-dependent protein cata…	GO:0000502 proteasome complex | GO:0005634 nucleus | GO:0005737 cytoplasm | GO:0005783 endoplasmic reticulum | GO:0005829 cytosol | GO:0016020 membrane | GO:0016234 inclusion body | GO:0031227 intrinsic component of endoplasmic reticulum membrane | GO:0031965 nuclear membrane | GO:0048471 perinuclear region of cytoplasm	GO:0001671 ATPase activator activity | GO:0030544 Hsp70 protein binding | GO:0031593 polyubiquitin modification-dependent protein binding | GO:0031625 ubiquitin protein ligase binding | GO:0043130 ubiquitin binding | GO:0051082 unfolded protein binding | GO:0051087 chaperone binding | GO:0070628 proteasome binding | GO:0140036 ubiquitin-dependent protein binding	mmu04141 Protein processing in endoplasmic reticulum	15.8323	0.619265	0.039114		0.619265	0.039114	0.223519	1.01501	3	19	74
Ptprn	protein_coding	chr1	complement(75247035..75264497)	17463	3.993	28	19275	protein tyrosine phosphatase, receptor type, N	GO:0000302 response to reactive oxygen species | GO:0001553 luteinization | GO:0006470 protein dephosphorylation | GO:0016311 dephosphorylation | GO:0019221 cytokine-mediated signaling pathway | GO:0030073 insulin secretion | GO:0035773 insulin secretion involved in cellular response to glucose stimulus | GO:0045944 positive regulation of transcription by RNA polymerase II | GO:1904692 positive r…	GO:0005634 nucleus | GO:0005768 endosome | GO:0005794 Golgi apparatus | GO:0005886 plasma membrane | GO:0016020 membrane | GO:0016021 integral component of membrane | GO:0030054 cell junction | GO:0030141 secretory granule | GO:0031410 cytoplasmic vesicle | GO:0042995 cell projection | GO:0043025 neuronal cell body | GO:0043679 axon terminus | GO:0045202 synapse	GO:0004725 protein tyrosine phosphatase activity | GO:0005515 protein binding | GO:0008134 transcription factor binding | GO:0016791 phosphatase activity | GO:0030507 spectrin binding | GO:0044389 ubiquitin-like protein ligase binding | GO:0051020 GTPase binding	mmu04940 Type I diabetes mellitus	1.37253	0.27444	0.199952		0.27444	0.199952	0.0949559	0.453925	19	10	41
Resp18	protein_coding	chr1	complement(75272197..75278455)	6259	0.71	6	19711	regulated endocrine-specific protein 18	GO:0001701 in utero embryonic development	GO:0005783 endoplasmic reticulum | GO:0005794 Golgi apparatus | GO:0030141 secretory granule | GO:0031410 cytoplasmic vesicle | GO:0043204 perikaryon | GO:0048237 rough endoplasmic reticulum lumen	GO:0003674 molecular_function	-	1.50318	0.0889659	0.0591852		0.0889659	0.0591852	0.0534027	0.124529	1	1	2
Dnpep	protein_coding	chr1	complement(75308565..75317654)	9090	2.216	18	13437	aspartyl aminopeptidase	GO:0006508 proteolysis	GO:0005737 cytoplasm | GO:0005829 cytosol	GO:0004177 aminopeptidase activity | GO:0008233 peptidase activity | GO:0008237 metallopeptidase activity | GO:0008270 zinc ion binding | GO:0016787 hydrolase activity | GO:0042802 identical protein binding | GO:0046872 metal ion binding | GO:0070006 metalloaminopeptidase activity	-	-1.57698	1.85181	2.92026	1	1.85181	2.92026	2.56651	1.13711	154	150	57
Des	protein_coding	chr1	75360292..75368579	8288	3.065	9	13346	desmin	GO:0007517 muscle organ development | GO:0045109 intermediate filament organization	GO:0005634 nucleus | GO:0005737 cytoplasm | GO:0005856 cytoskeleton | GO:0005882 intermediate filament | GO:0005886 plasma membrane | GO:0005911 cell-cell junction | GO:0005916 fascia adherens | GO:0005921 gap junction | GO:0014704 intercalated disc | GO:0016020 membrane | GO:0030018 Z disc | GO:0031594 neuromuscular junction | GO:0042383 sarcolemma | GO:0043292 contractile fiber | GO:0045098 typ…	GO:0005200 structural constituent of cytoskeleton | GO:0005515 protein binding | GO:0008092 cytoskeletal protein binding | GO:0042802 identical protein binding	mmu05410 Hypertrophic cardiomyopathy (HCM) | mmu05412 Arrhythmogenic right ventricular cardiomyopathy (ARVC) | mmu05414 Dilated cardiomyopathy	2.48034	0.0340058	0.0137101		0.0340058	0.0137101	0.0247412	0.0432703	1	2	3
Gm15179	lncRNA	chr1	complement(75368210..75375015)	6806	6.806	0	100503248	predicted gene 15179	-	-	-	-	3.15609	0.0389725	0.0123484		0.0389725	0.0123484	0	0.077945	2	0	12
Speg	protein_coding	chr1	75375297..75432320	57024	13.43	66	11790	SPEG complex locus	GO:0001701 in utero embryonic development | GO:0006468 protein phosphorylation | GO:0016310 phosphorylation | GO:0030154 cell differentiation | GO:0042692 muscle cell differentiation | GO:0055013 cardiac muscle cell development | GO:0060541 respiratory system development | GO:0072358 cardiovascular system development	GO:0005634 nucleus	GO:0000166 nucleotide binding | GO:0004672 protein kinase activity | GO:0004674 protein serine/threonine kinase activity | GO:0005524 ATP binding | GO:0016301 kinase activity | GO:0016740 transferase activity	-	-4.74098	0.0204592	0.0969967		0.0204592	0.0969967	0.0112929	0.0296255	31	4	9
Gmppa	protein_coding	chr1	75435912..75443176	7265	1.875	23	69080	GDP-mannose pyrophosphorylase A	GO:0009058 biosynthetic process	GO:0005575 cellular_component | GO:0005737 cytoplasm	GO:0003674 molecular_function | GO:0016740 transferase activity | GO:0016779 nucleotidyltransferase activity	mmu00051 Fructose and mannose metabolism | mmu00520 Amino sugar and nucleotide sugar metabolism | mmu01100 Metabolic pathways	-1.28136	3.76042	4.81846	1	3.76042	4.81846	4.83301	2.68784	215	239	114
Asic4	protein_coding	chr1	75450510..75474340	23831	2.65	10	241118	acid-sensing (proton-gated) ion channel family member 4	GO:0001662 behavioral fear response | GO:0006811 ion transport | GO:0006814 sodium ion transport	GO:0016020 membrane | GO:0016021 integral component of membrane	GO:0005272 sodium channel activity	mmu04750 Inflammatory mediator regulation of TRP channels	15495	0.015495	0.001		0.015495	0	0.0143079	0.0166822	0	1	1
Gm32506	#N/A	chr1	complement(75455521..75459955)	4435	4.435	0	102635080	-	-	-	-	-	2.55521	0.0242105	0.00947497		0.0242105	0.00947497	0.00854924	0.0398718	1	1	4
Chpf	protein_coding	chr1	complement(75474569..75479471)	4903	3.235	5	74241	chondroitin polymerizing factor	GO:0030206 chondroitin sulfate biosynthetic process	GO:0005575 cellular_component | GO:0005737 cytoplasm | GO:0005739 mitochondrion | GO:0005794 Golgi apparatus | GO:0016020 membrane | GO:0016021 integral component of membrane | GO:0032580 Golgi cisterna membrane	GO:0005515 protein binding | GO:0008376 acetylgalactosaminyltransferase activity | GO:0016740 transferase activity | GO:0016757 transferase activity, transferring glycosyl groups | GO:0046872 metal ion binding | GO:0047238 glucuronosyl-N-acetylgalactosaminyl-proteoglycan 4-beta-N-acetylgalactosaminyltransferase activity | GO:0050510 N-acetylgalactosaminyl-proteoglycan 3-beta-glucuronosyltransfera…	mmu00532 Glycosaminoglycan biosynthesis - chondroitin sulfate / dermatan sulfate | mmu01100 Metabolic pathways	2.20453	0.0859082	0.0389689		0.0859082	0.0389689	0.0351616	0.136655	3	3	10
Tmem198	protein_coding	chr1	75479532..75485693	6162	2.185	7	319998	transmembrane protein 198	GO:0007275 multicellular organism development | GO:0016055 Wnt signaling pathway | GO:0090263 positive regulation of canonical Wnt signaling pathway	GO:0005886 plasma membrane | GO:0016020 membrane | GO:0016021 integral component of membrane | GO:0031410 cytoplasmic vesicle	GO:0003674 molecular_function	-	1.02707	0.0592574	0.0576954		0.0592574	0.0576954	0.0173528	0.101162	3	1	5
Obsl1	protein_coding	chr1	complement(75485825..75506452)	20628	6.405	28	98733	obscurin-like 1	-	GO:0005737 cytoplasm | GO:0005794 Golgi apparatus	-	-	1.05203	0.00690208	0.00656073		0.00690208	0.00656073	0	0.0138042	1	0	2
Inha	protein_coding	chr1	75507077..75510366	3290	1.919	4	16322	inhibin alpha	GO:0001541 ovarian follicle development | GO:0008584 male gonad development | GO:0010862 positive regulation of pathway-restricted SMAD protein phosphorylation | GO:0042127 regulation of cell population proliferation | GO:0042541 hemoglobin biosynthetic process | GO:0046882 negative regulation of follicle-stimulating hormone secretion | GO:0051726 regulation of cell cycle | GO:0060395 SMAD protei…	GO:0001750 photoreceptor outer segment | GO:0001917 photoreceptor inner segment | GO:0005576 extracellular region | GO:0005615 extracellular space | GO:0005737 cytoplasm | GO:0034673 inhibin-betaglycan-ActRII complex | GO:0043025 neuronal cell body | GO:0043512 inhibin A complex | GO:0043513 inhibin B complex	GO:0005102 signaling receptor binding | GO:0005125 cytokine activity | GO:0005179 hormone activity | GO:0008083 growth factor activity | GO:0034711 inhibin binding | GO:0044877 protein-containing complex binding	-	1.42831	0.0312766	0.0218976		0.0312766	0.0218976	0.0395163	0.0230369	1	2	1
Stk11ip	protein_coding	chr1	75521529..75537335	15807	4.513	28	71728	serine/threonine kinase 11 interacting protein	GO:0008104 protein localization	GO:0005737 cytoplasm	GO:0019901 protein kinase binding	-	-1.18559	2.11263	2.50471	1	2.11263	2.50471	3.10855	1.11671	269	370	114
Slc4a3	protein_coding	chr1	75546041..75559431	13391	5.681	37	20536	solute carrier family 4 (anion exchanger), member 3	GO:0006811 ion transport | GO:0006820 anion transport | GO:0015701 bicarbonate transport | GO:0051453 regulation of intracellular pH | GO:0061337 cardiac conduction	GO:0005886 plasma membrane | GO:0009897 external side of plasma membrane | GO:0016020 membrane | GO:0016021 integral component of membrane	GO:0005452 inorganic anion exchanger activity | GO:0008509 anion transmembrane transporter activity | GO:0015106 bicarbonate transmembrane transporter activity | GO:0015297 antiporter activity | GO:0015301 anion:anion antiporter activity | GO:0019899 enzyme binding	-	7.02927	0.103989	0.0147937		0.103989	0.0147937	0.153506	0.0544719	2	23	7
LOC102638885	#N/A	chr1	75568068..75568667	600	0.6	0	102638885	-	-	-	-	-	1	0.001	0.001		0	0	0	0	0	0	0
Gm5257	processed_pseudogene	chr1	75636378..75637221	844	0.844	0	383531	predicted gene 5257	-	-	-	-	1	0.001	0.001		0	0	0	0	0	0	0
Gm32622	#N/A	chr1	75936719..76039154	102436	102.436	0	102635231	-	-	-	-	-	2.81822	0.00924875	0.00328177		0.00924875	0.00328177	0.00296114	0.0155364	8	8	36
Gm29065	lncRNA	chr1	complement(76016496..76019725)	3230	3.23	0	102635304	-	-	-	-	-	-1.90109	0.00684332	0.0130097		0.00684332	0.0130097	0	0.0136866	1	0	1
Gm32737	#N/A	chr1	76094981..76106216	11236	11.236	0	102635380	-	-	-	-	-	-3.80217	0.00590172	0.0224394		0.00590172	0.0224394	0	0.0118034	6	0	3
Gm17751	lncRNA	chr1	76489133..76502028	12896	12.896	0	620079	predicted gene, 17751	-	-	-	-	78369.4	0.0783694	0.001		0.0783694	0	0.0470421	0.109697	0	16	32
Mir6343	miRNA	chr1	76509560..76509643	84	0.084	0	102465175	microRNA 6343	-	-	-	-	1	0.001	0.001		0	0	0	0	0	0	0
LOC102638999	#N/A	chr1	77050301..77050884	584	0.584	0	102638999	-	-	-	-	-	1	0.001	0.001		0	0	0	0	0	0	0
Tfdp1-ps	#N/A	chr1	77065870..77067692	1823	1.823	0	21782	transcription factor Dp 1, pseudogene	-	-	-	-	12125	0.012125	0.001		0.012125	0	0	0.02425	0	0	1
Epha4	protein_coding	chr1	complement(77367182..77515103)	147922	6.375	22	13838	Eph receptor A4	GO:0006468 protein phosphorylation | GO:0007155 cell adhesion | GO:0007169 transmembrane receptor protein tyrosine kinase signaling pathway | GO:0007275 multicellular organism development | GO:0007399 nervous system development | GO:0007411 axon guidance | GO:0007628 adult walking behavior | GO:0008045 motor neuron axon guidance | GO:0008347 glial cell migration | GO:0010977 negative regulation o…	GO:0005737 cytoplasm | GO:0005741 mitochondrial outer membrane | GO:0005768 endosome | GO:0005783 endoplasmic reticulum | GO:0005794 Golgi apparatus | GO:0005886 plasma membrane | GO:0005887 integral component of plasma membrane | GO:0009986 cell surface | GO:0014069 postsynaptic density | GO:0016020 membrane | GO:0016021 integral component of membrane | GO:0030054 cell junction | GO:0030175 filo…	GO:0000166 nucleotide binding | GO:0004672 protein kinase activity | GO:0004713 protein tyrosine kinase activity | GO:0004714 transmembrane receptor protein tyrosine kinase activity | GO:0005003 ephrin receptor activity | GO:0005004 GPI-linked ephrin receptor activity | GO:0005005 transmembrane-ephrin receptor activity | GO:0005515 protein binding | GO:0005524 ATP binding | GO:0016301 kinase acti…	mmu04360 Axon guidance	1.06835	0.0985901	0.0922824		0.0985901	0.0922824	0.0654235	0.131757	14	11	19
Mir6352	miRNA	chr1	complement(77496653..77496768)	116	0.116	0	102465180	microRNA 6352	-	-	-	-	1	0.001	0.001		0	0	0	0	0	0	0
Gm32793	#N/A	chr1	77522190..77602382	80193	80.193	0	102635461	-	-	-	-	-	3.1417	0.0329253	0.0104801		0.0329253	0.0104801	0.0217492	0.0441014	20	46	80
Gm32974	#N/A	chr1	77604423..77642338	37916	37.916	0	102635703	-	-	-	-	-	19491.3	0.0194913	0.001		0.0194913	0	0.011	0.0279826	0	11	24
Gm33083	#N/A	chr1	complement(77770548..77896298)	125751	125.751	0	102635843	-	-	-	-	-	1.88758	0.0107229	0.00568079		0.0107229	0.00568079	0.00211061	0.0193353	17	7	55
Gm33030	#N/A	chr1	77813643..77915486	101844	101.844	0	102635779	-	-	-	-	-	3.77211	0.0249023	0.0066017		0.0249023	0.0066017	0.0163809	0.0334237	16	44	77
Pax3	protein_coding	chr1	complement(78101267..78197547)	96281	5.65	16	18505	paired box 3	GO:0000122 negative regulation of transcription by RNA polymerase II | GO:0001755 neural crest cell migration | GO:0001843 neural tube closure | GO:0006355 regulation of transcription, DNA-templated | GO:0007275 multicellular organism development | GO:0007399 nervous system development | GO:0007507 heart development | GO:0007517 muscle organ development | GO:0008283 cell population proliferation …	GO:0005634 nucleus | GO:0005654 nucleoplasm | GO:0005667 transcription factor complex	GO:0000981 DNA-binding transcription factor activity, RNA polymerase II-specific | GO:0003677 DNA binding | GO:0003682 chromatin binding | GO:0003700 DNA-binding transcription factor activity | GO:0005515 protein binding | GO:0043565 sequence-specific DNA binding | GO:0071837 HMG box domain binding	mmu05202 Transcriptional misregulation in cancer	1.42831	0.010623	0.00743743		0.010623	0.00743743	0.0134216	0.00782439	1	2	1
Gm33152	#N/A	chr1	78199983..78203051	3069	3.069	0	102635943	-	-	-	-	-	7202.32	0.00720232	0.001		0.00720232	0	0	0.0144046	0	0	1
Gm2102	processed_pseudogene	chr1	complement(78214966..78218981)	4016	3.581	2	100039210	-	-	-	-	-	10588.1	0.0105881	0.001		0.0105881	0	0.0211761	0	0	2	0
Sgpp2	protein_coding	chr1	78309501..78420289	110789	4.879	11	433323	sphingosine-1-phosphate phosphotase 2	GO:0006670 sphingosine metabolic process | GO:0061469 regulation of type B pancreatic cell proliferation	GO:0005783 endoplasmic reticulum | GO:0016020 membrane | GO:0016021 integral component of membrane	GO:0016787 hydrolase activity | GO:0042392 sphingosine-1-phosphate phosphatase activity	mmu00600 Sphingolipid metabolism | mmu04071 Sphingolipid signaling pathway	1.57804	0.0271825	0.0172254		0.0271825	0.0172254	0	0.054365	2	0	6
Gm33402	#N/A	chr1	complement(78310396..78311860)	1465	1.465	0	102636294	-	-	-	-	-	1	0.001	0.001		0	0	0	0	0	0	0
Gm28410	lncRNA	chr1	complement(78327189..78343587)	16399	16.399	0	102636225	-	-	-	-	-	7511.77	0.00751177	0.001		0.00751177	0	0.00693626	0.00808729	0	3	3
Gm19072	#N/A	chr1	complement(78414073..78414699)	627	0.627	0	100418204	predicted gene, 19072	-	-	-	-	-134040	0.001	0.13404		0	0.13404	0	0	2	0	0
Farsb	protein_coding	chr1	complement(78417958..78488897)	70940	2.539	19	23874	phenylalanyl-tRNA synthetase, beta subunit	GO:0006412 translation | GO:0006432 phenylalanyl-tRNA aminoacylation | GO:0051290 protein heterotetramerization	GO:0005737 cytoplasm | GO:0009328 phenylalanine-tRNA ligase complex	GO:0000166 nucleotide binding | GO:0000287 magnesium ion binding | GO:0003723 RNA binding | GO:0004812 aminoacyl-tRNA ligase activity | GO:0004826 phenylalanine-tRNA ligase activity | GO:0005524 ATP binding | GO:0016874 ligase activity	mmu00970 Aminoacyl-tRNA biosynthesis	-1.99474	2.2319	4.45206	1	2.2319	4.45206	2.37441	2.08938	269	159	120
Mogat1	protein_coding	chr1	78511060..78538173	27114	1.316	8	68393	monoacylglycerol O-acyltransferase 1	GO:0006071 glycerol metabolic process | GO:0006629 lipid metabolic process | GO:0006651 diacylglycerol biosynthetic process	GO:0005783 endoplasmic reticulum | GO:0016020 membrane | GO:0016021 integral component of membrane	GO:0003846 2-acylglycerol O-acyltransferase activity | GO:0004144 diacylglycerol O-acyltransferase activity | GO:0016740 transferase activity | GO:0016746 transferase activity, transferring acyl groups | GO:0016747 transferase activity, transferring acyl groups other than amino-acyl groups	mmu00561 Glycerolipid metabolism	1	0.001	0.001		0	0	0	0	0	0	0
LOC105243959	#N/A	chr1	complement(78560045..78588394)	28350	28.35	0	105243959	-	-	-	-	-	4.33662	0.0835628	0.0192691		0.0835628	0.0192691	0.0829201	0.0842054	13	62	54
5730419F03Rik	lncRNA	chr1	complement(78595614..78609761)	14148	14.148	0	70537	-	-	-	-	-	16518.6	0.0165186	0.001		0.0165186	0	0.00803984	0.0249974	0	3	8
Utp14b	protein_coding	chr1	78657825..78667601	9777	3.981	5	195434	UTP14, U3 small nucleolar ribonucleoprotein, homolog B (yeast)	GO:0006364 rRNA processing | GO:0007275 multicellular organism development | GO:0007283 spermatogenesis | GO:0030154 cell differentiation | GO:0042254 ribosome biogenesis | GO:0051321 meiotic cell cycle	GO:0005634 nucleus | GO:0005730 nucleolus | GO:0005829 cytosol | GO:0032040 small-subunit processome	-	mmu03008 Ribosome biogenesis in eukaryotes	1.10779	0.268946	0.242777		0.268946	0.242777	0.171436	0.366455	23	18	33
Acsl3	protein_coding	chr1	78657825..78707743	49919	3.95	16	74205	acyl-CoA synthetase long-chain family member 3	GO:0001676 long-chain fatty acid metabolic process | GO:0006629 lipid metabolic process | GO:0006631 fatty acid metabolic process | GO:0006633 fatty acid biosynthetic process | GO:0034379 very-low-density lipoprotein particle assembly | GO:0042998 positive regulation of Golgi to plasma membrane protein transport | GO:0044539 long-chain fatty acid import into cell | GO:0051047 positive regulation …	GO:0005739 mitochondrion | GO:0005741 mitochondrial outer membrane | GO:0005777 peroxisome | GO:0005783 endoplasmic reticulum | GO:0005794 Golgi apparatus | GO:0005811 lipid droplet | GO:0016020 membrane | GO:0016021 integral component of membrane | GO:0043231 intracellular membrane-bounded organelle | GO:0048471 perinuclear region of cytoplasm	GO:0000166 nucleotide binding | GO:0003824 catalytic activity | GO:0004467 long-chain fatty acid-CoA ligase activity | GO:0005524 ATP binding | GO:0016874 ligase activity | GO:0019901 protein kinase binding | GO:0019904 protein domain specific binding | GO:0047676 arachidonate-CoA ligase activity | GO:0102391 decanoate-CoA ligase activity	mmu00061 Fatty acid biosynthesis | mmu00071 Fatty acid degradation | mmu01100 Metabolic pathways | mmu01212 Fatty acid metabolism | mmu03320 PPAR signaling pathway | mmu04146 Peroxisome | mmu04920 Adipocytokine signaling pathway	-4.96317	0.450126	2.23405	1	0.450126	2.23405	0.172781	0.727471	210	18	65
Gm33640	#N/A	chr1	complement(78679968..78681586)	1619	1.619	0	102636629	-	-	-	-	-	40958.5	0.0409585	0.001		0.0409585	0	0	0.0819169	0	0	3
LOC102642773	#N/A	chr1	78719984..78746154	26171	26.171	0	102642773	-	-	-	-	-	24740	0.02474	0.001		0.02474	0	0.0173853	0.0320946	0	12	19
Gm33693	#N/A	chr1	complement(78726659..78740969)	14311	14.311	0	102636693	-	-	-	-	-	17441.1	0.0174411	0.001		0.0174411	0	0.0317931	0.00308908	0	12	1
Gm6159	processed_pseudogene	chr1	complement(78783136..78784859)	1724	1.724	0	620521	predicted gene 6159	-	-	-	-	1	0.001	0.001		0	0	0	0	0	0	0
Gm29536	lncRNA	chr1	complement(78791639..79224511)	432873	432.873	0	102636764	-	-	-	-	-	1.24644	0.0296448	0.0237836		0.0296448	0.0237836	0.0199708	0.0393187	245	228	385
Kcne4	protein_coding	chr1	78816949..78820025	3077	2.463	2	57814	potassium voltage-gated channel, Isk-related subfamily, gene 4	GO:0006811 ion transport | GO:0006813 potassium ion transport | GO:0034765 regulation of ion transmembrane transport | GO:0060307 regulation of ventricular cardiac muscle cell membrane repolarization | GO:0071805 potassium ion transmembrane transport | GO:0086005 ventricular cardiac muscle cell action potential | GO:0086011 membrane repolarization during action potential | GO:0086091 regulation o…	GO:0008076 voltage-gated potassium channel complex | GO:0016020 membrane | GO:0016021 integral component of membrane | GO:0016324 apical plasma membrane	GO:0005244 voltage-gated ion channel activity | GO:0005249 voltage-gated potassium channel activity | GO:0005251 delayed rectifier potassium channel activity | GO:0005267 potassium channel activity | GO:0015459 potassium channel regulator activity | GO:0044325 ion channel binding | GO:1902282 voltage-gated potassium channel activity involved in ventricular cardiac muscle cell action potential rep…	-	1	0.001	0.001		0	0	0	0	0	0	0
Gm5830	processed_pseudogene	chr1	complement(78966381..78968097)	1717	1.717	0	545332	predicted pseudogene 5830	-	-	-	-	1	0.001	0.001		0	0	0	0	0	0	0
Scg2	protein_coding	chr1	complement(79434669..79440121)	5453	2.516	5	20254	secretogranin II	GO:0000165 MAPK cascade | GO:0001525 angiogenesis | GO:0001938 positive regulation of endothelial cell proliferation | GO:0035556 intracellular signal transduction | GO:0048245 eosinophil chemotaxis | GO:0050918 positive chemotaxis | GO:0050930 induction of positive chemotaxis | GO:2000352 negative regulation of endothelial cell apoptotic process | GO:2001237 negative regulation of extrinsic apop…	GO:0005576 extracellular region | GO:0005615 extracellular space | GO:0030141 secretory granule | GO:0031045 dense core granule | GO:0098992 neuronal dense core vesicle	GO:0005125 cytokine activity | GO:0042056 chemoattractant activity	-	-3.15694	0.148133	0.467648		0.148133	0.467648	0.120559	0.175707	28	8	10
Gm19027	processed_pseudogene	chr1	complement(79505803..79507157)	1355	1.355	0	100418139	predicted gene, 19027	-	-	-	-	1	0.001	0.001		0	0	0	0	0	0	0
Ap1s3	protein_coding	chr1	complement(79606876..79672020)	65145	2.876	5	252903	adaptor-related protein complex AP-1, sigma 3	GO:0006605 protein targeting | GO:0006886 intracellular protein transport | GO:0015031 protein transport | GO:0016192 vesicle-mediated transport	GO:0005794 Golgi apparatus | GO:0005905 clathrin-coated pit | GO:0016020 membrane | GO:0030117 membrane coat | GO:0031410 cytoplasmic vesicle | GO:0043231 intracellular membrane-bounded organelle	GO:0003674 molecular_function	mmu04142 Lysosome	-1.87262	0.522767	0.978942		0.522767	0.978942	0.461424	0.584109	67	35	38
Wdfy1	protein_coding	chr1	complement(79702262..79776047)	73786	5.619	18	69368	WD repeat and FYVE domain containing 1	GO:0034141 positive regulation of toll-like receptor 3 signaling pathway | GO:0034145 positive regulation of toll-like receptor 4 signaling pathway	GO:0005634 nucleus | GO:0005768 endosome | GO:0005769 early endosome | GO:0005829 cytosol	GO:0005515 protein binding | GO:0005545 1-phosphatidylinositol binding | GO:0046872 metal ion binding	-	-1.51308	1.73484	2.62494	1	1.73484	2.62494	1.94337	1.52631	351	288	194
Mrpl44	protein_coding	chr1	79776018..79781445	5428	1.424	4	69163	mitochondrial ribosomal protein L44	GO:0006396 RNA processing | GO:0030422 production of siRNA involved in RNA interference | GO:0031053 primary miRNA processing | GO:0031054 pre-miRNA processing | GO:0070125 mitochondrial translational elongation	GO:0005634 nucleus | GO:0005654 nucleoplasm | GO:0005739 mitochondrion | GO:0005762 mitochondrial large ribosomal subunit | GO:0005840 ribosome | GO:0005886 plasma membrane	GO:0003723 RNA binding | GO:0003725 double-stranded RNA binding | GO:0004518 nuclease activity | GO:0004519 endonuclease activity | GO:0004525 ribonuclease III activity | GO:0005515 protein binding | GO:0016787 hydrolase activity	-	-1.48989	0.831871	1.2394	1	0.831871	1.2394	1.0118	0.651941	42	38	21
LOC105243960	#N/A	chr1	79787924..79792323	4400	4.4	0	105243960	-	-	-	-	-	-114604	0.001	0.114604		0	0.114604	0	0	12	0	0
Serpine2	protein_coding	chr1	complement(79794319..79861175)	66857	2.271	12	20720	serine (or cysteine) peptidase inhibitor, clade E, member 2	GO:0007275 multicellular organism development | GO:0007399 nervous system development | GO:0007596 blood coagulation | GO:0008285 negative regulation of cell population proliferation | GO:0009611 response to wounding | GO:0010466 negative regulation of peptidase activity | GO:0010544 negative regulation of platelet activation | GO:0010757 negative regulation of plasminogen activation | GO:0010766…	GO:0005576 extracellular region | GO:0005615 extracellular space | GO:0005829 cytosol | GO:0016020 membrane | GO:0031091 platelet alpha granule | GO:0031232 extrinsic component of external side of plasma membrane | GO:0031594 neuromuscular junction | GO:0043025 neuronal cell body | GO:0062023 collagen-containing extracellular matrix	GO:0004867 serine-type endopeptidase inhibitor activity | GO:0005102 signaling receptor binding | GO:0005539 glycosaminoglycan binding | GO:0008201 heparin binding | GO:0030414 peptidase inhibitor activity	-	1.4429	0.266986	0.185035		0.266986	0.185035	0.0667827	0.46719	10	4	24
Gm5529	processed_pseudogene	chr1	complement(79922277..79923505)	1229	1.229	0	433326	predicted pseudogene 5529	-	-	-	-	17985.3	0.0179853	0.001		0.0179853	0	0	0.0359706	0	0	1
Gm28071	processed_pseudogene	chr1	79957564..79958129	566	0.566	0	102636960	-	-	-	-	-	-74242.9	0.001	0.0742429		0	0.0742429	0	0	1	0	0
Gm33970	#N/A	chr1	complement(80037178..80038461)	1284	1.284	0	102637066	-	-	-	-	-	1	0.001	0.001		0	0	0	0	0	0	0
Fam124b	protein_coding	chr1	complement(80186969..80218504)	31536	4.124	9	241128	family with sequence similarity 124, member B	GO:0008150 biological_process	GO:0005634 nucleus | GO:0005654 nucleoplasm | GO:0005739 mitochondrion	GO:0003674 molecular_function	-	107236	0.107236	0.001		0.107236	0	0.128715	0.0857572	0	14	8
2310015K22Rik	lncRNA	chr1	80207989..80229463	21475	21.475	0	69565	-	GO:0008150 biological_process	GO:0005575 cellular_component	GO:0003674 molecular_function	-	25300.3	0.0253003	0.001		0.0253003	0	0.0300149	0.0205857	0	17	10
Gm34098	#N/A	chr1	80236352..80248414	12063	12.063	0	102637229	-	-	-	-	-	-1.52087	0.00916186	0.013934		0.00916186	0.013934	0	0.0183237	4	0	5
Cul3	protein_coding	chr1	complement(80265610..80340762)	75153	4.503	22	26554	cullin 3	GO:0000122 negative regulation of transcription by RNA polymerase II | GO:0000209 protein polyubiquitination | GO:0000278 mitotic cell cycle | GO:0000902 cell morphogenesis | GO:0001701 in utero embryonic development | GO:0001831 trophectodermal cellular morphogenesis | GO:0006357 regulation of transcription by RNA polymerase II | GO:0006511 ubiquitin-dependent protein catabolic process | GO:0006…	GO:0000922 spindle pole | GO:0005634 nucleus | GO:0005737 cytoplasm | GO:0005794 Golgi apparatus | GO:0005813 centrosome | GO:0005827 polar microtubule | GO:0005856 cytoskeleton | GO:0005929 cilium | GO:0031461 cullin-RING ubiquitin ligase complex | GO:0031463 Cul3-RING ubiquitin ligase complex | GO:0031514 motile cilium | GO:0036126 sperm flagellum | GO:0042995 cell projection | GO:0072686 mitot…	GO:0004842 ubiquitin-protein transferase activity | GO:0005112 Notch binding | GO:0005515 protein binding | GO:0030332 cyclin binding | GO:0031208 POZ domain binding | GO:0031625 ubiquitin protein ligase binding | GO:0042802 identical protein binding	mmu04120 Ubiquitin mediated proteolysis	-1.49923	8.13535	12.1968	1	8.13535	12.1968	7.49392	8.77677	1307	890	894
LOC105243961	#N/A	chr1	80340913..80345117	4205	4.205	0	105243961	-	-	-	-	-	-1.14231	0.122476	0.139905		0.122476	0.139905	0.234438	0.0105132	14	26	1
Gm6189	processed_pseudogene	chr1	complement(80383107..80385185)	2079	2.079	0	620899	predicted gene 6189	-	-	-	-	9118.78	0.00911878	0.001		0.00911878	0	0.0182376	0	0	1	0
LOC105242389	#N/A	chr1	80428170..80498102	69933	69.933	0	105242389	-	-	-	-	-	14496.7	0.0144967	0.001		0.0144967	0	0.00813262	0.0208608	0	15	33
1700016L21Rik	lncRNA	chr1	80445932..80475660	29729	29.729	0	72208	RIKEN cDNA 1700016L21 gene	-	-	-	-	1	0.001	0.001		0	0	0	0	0	0	0
Dock10	protein_coding	chr1	complement(80501068..80758704)	257637	9.97	75	210293	dedicator of cytokinesis 10	GO:0001782 B cell homeostasis | GO:0002315 marginal zone B cell differentiation | GO:0007264 small GTPase mediated signal transduction | GO:0030334 regulation of cell migration | GO:0043547 positive regulation of GTPase activity | GO:0060997 dendritic spine morphogenesis	GO:0005634 nucleus | GO:0005654 nucleoplasm | GO:0005737 cytoplasm | GO:0005829 cytosol | GO:0030054 cell junction | GO:0042995 cell projection | GO:0043197 dendritic spine | GO:0045202 synapse	GO:0005085 guanyl-nucleotide exchange factor activity | GO:0005089 Rho guanyl-nucleotide exchange factor activity | GO:0017048 Rho GTPase binding	-	-1.6234	9.89699	16.0668	1	9.89699	16.0668	10.6066	9.18742	3812	2789	2072
Nyap2	protein_coding	chr1	81076553..81365845	289293	13.909	18	241134	neuronal tyrosine-phophorylated phosphoinositide 3-kinase adaptor 2	GO:0014065 phosphatidylinositol 3-kinase signaling | GO:0048812 neuron projection morphogenesis	-	GO:0005515 protein binding	-	7945.9	0.0079459	0.001		0.0079459	0	0	0.0158918	0	0	5
Gm6198	processed_pseudogene	chr1	complement(81554157..81557483)	3327	3.327	0	621020	predicted gene 6198	-	-	-	-	2.25444	0.0854238	0.0378913		0.0854238	0.0378913	0.0113964	0.159451	3	1	12
Gm5530	processed_pseudogene	chr1	complement(81741554..81742988)	1435	1.435	0	433328	predicted gene 5530	-	-	-	-	1	0.001	0.001		0	0	0	0	0	0	0
Gm7516	processed_pseudogene	chr1	81797241..81797946	706	0.706	0	665145	predicted gene 7516	-	-	-	-	26852.6	0.0268526	0.001		0.0268526	0	0.0537052	0	0	1	0
Mir6344	miRNA	chr1	82131916..82132019	104	0.104	0	102466629	microRNA 6344	-	-	-	-	1	0.001	0.001		0	0	0	0	0	0	0
Irs1	protein_coding	chr1	complement(82233105..82291439)	58335	9.163	2	16367	insulin receptor substrate 1	GO:0002053 positive regulation of mesenchymal cell proliferation | GO:0007165 signal transduction | GO:0008286 insulin receptor signaling pathway | GO:0010468 regulation of gene expression | GO:0010907 positive regulation of glucose metabolic process | GO:0014065 phosphatidylinositol 3-kinase signaling | GO:0016042 lipid catabolic process | GO:0030073 insulin secretion | GO:0030335 positive regul…	GO:0005634 nucleus | GO:0005654 nucleoplasm | GO:0005737 cytoplasm | GO:0005829 cytosol | GO:0005886 plasma membrane | GO:0005899 insulin receptor complex | GO:0005901 caveola | GO:0036064 ciliary basal body | GO:0043231 intracellular membrane-bounded organelle	GO:0001784 phosphotyrosine residue binding | GO:0005068 transmembrane receptor protein tyrosine kinase adaptor activity | GO:0005070 SH3/SH2 adaptor activity | GO:0005080 protein kinase C binding | GO:0005158 insulin receptor binding | GO:0005159 insulin-like growth factor receptor binding | GO:0005515 protein binding | GO:0019901 protein kinase binding | GO:0019904 protein domain specific bindin…	mmu04022 cGMP-PKG signaling pathway | mmu04068 FoxO signaling pathway | mmu04150 mTOR signaling pathway | mmu04151 PI3K-Akt signaling pathway | mmu04152 AMPK signaling pathway | mmu04722 Neurotrophin signaling pathway | mmu04910 Insulin signaling pathway | mmu04920 Adipocytokine signaling pathway | mmu04923 Regulation of lipolysis in adipocytes | mmu04930 Type II diabetes mellitus | mmu04931 Insu…	9.24367	0.0423914	0.00458599		0.0423914	0.00458599	0.0124138	0.072369	1	3	15
Gm34227	#N/A	chr1	complement(82309835..82326430)	16596	16.596	0	102637414	-	-	-	-	-	7.21643	0.0913609	0.0126601		0.0913609	0.0126601	0.102809	0.0799129	5	45	30
Rhbdd1	protein_coding	chr1	82316457..82445366	128910	4.027	11	76867	rhomboid domain containing 1	GO:0006915 apoptotic process | GO:0007283 spermatogenesis | GO:0010954 positive regulation of protein processing | GO:0030154 cell differentiation | GO:0031293 membrane protein intracellular domain proteolysis | GO:0033619 membrane protein proteolysis | GO:0034620 cellular response to unfolded protein | GO:0034644 cellular response to UV | GO:0036503 ERAD pathway | GO:0043066 negative regulation …	GO:0005739 mitochondrion | GO:0005783 endoplasmic reticulum | GO:0005789 endoplasmic reticulum membrane | GO:0016020 membrane | GO:0016021 integral component of membrane | GO:0030176 integral component of endoplasmic reticulum membrane | GO:0044322 endoplasmic reticulum quality control compartment	GO:0004175 endopeptidase activity | GO:0004252 serine-type endopeptidase activity | GO:0005515 protein binding | GO:0008233 peptidase activity | GO:0008236 serine-type peptidase activity | GO:0016787 hydrolase activity	-	1.42585	2.27644	1.59654	1	2.27644	1.59654	2.86229	1.69059	153	304	154
Col4a4	protein_coding	chr1	complement(82448419..82586849)	138431	10.618	51	12829	collagen, type IV, alpha 4	GO:0030198 extracellular matrix organization | GO:0032836 glomerular basement membrane development | GO:0038063 collagen-activated tyrosine kinase receptor signaling pathway	GO:0005576 extracellular region | GO:0005581 collagen trimer | GO:0005587 collagen type IV trimer | GO:0005604 basement membrane | GO:0005615 extracellular space | GO:0031012 extracellular matrix | GO:0062023 collagen-containing extracellular matrix	GO:0005201 extracellular matrix structural constituent | GO:0030020 extracellular matrix structural constituent conferring tensile strength	mmu04151 PI3K-Akt signaling pathway | mmu04510 Focal adhesion | mmu04512 ECM-receptor interaction | mmu04974 Protein digestion and absorption | mmu05146 Amoebiasis | mmu05200 Pathways in cancer | mmu05222 Small cell lung cancer	-29.15	0.00624522	0.182048		0.00624522	0.182048	0	0.0124904	46	0	3
Col4a3	protein_coding	chr1	82586921..82722059	135139	8.609	52	12828	collagen, type IV, alpha 3	GO:0006919 activation of cysteine-type endopeptidase activity involved in apoptotic process | GO:0007155 cell adhesion | GO:0007166 cell surface receptor signaling pathway | GO:0016525 negative regulation of angiogenesis | GO:0030198 extracellular matrix organization | GO:0032836 glomerular basement membrane development | GO:0038063 collagen-activated tyrosine kinase receptor signaling pathway | …	GO:0005576 extracellular region | GO:0005581 collagen trimer | GO:0005587 collagen type IV trimer | GO:0005604 basement membrane | GO:0005615 extracellular space | GO:0005783 endoplasmic reticulum | GO:0031012 extracellular matrix | GO:0043231 intracellular membrane-bounded organelle | GO:0062023 collagen-containing extracellular matrix	GO:0005178 integrin binding | GO:0005201 extracellular matrix structural constituent | GO:0030020 extracellular matrix structural constituent conferring tensile strength	mmu04151 PI3K-Akt signaling pathway | mmu04510 Focal adhesion | mmu04512 ECM-receptor interaction | mmu04974 Protein digestion and absorption | mmu05146 Amoebiasis | mmu05200 Pathways in cancer | mmu05222 Small cell lung cancer	-31.1565	0.0150398	0.468587		0.0150398	0.468587	0.00440422	0.0256754	96	1	5
LOC105243964	#N/A	chr1	complement(82691511..82700223)	8713	8.713	0	105243964	-	-	-	-	-	32998.4	0.0329984	0.001		0.0329984	0	0.060923	0.00507378	0	14	1
LOC105243963	#N/A	chr1	complement(82718979..82724848)	5870	5.87	0	105243963	-	-	-	-	-	16684.1	0.0166841	0.001		0.0166841	0	0.0258371	0.00753115	0	4	1
Mff	protein_coding	chr1	82724895..82752390	27496	2.097	17	75734	mitochondrial fission factor	GO:0000266 mitochondrial fission | GO:0006626 protein targeting to mitochondrion | GO:0010666 positive regulation of cardiac muscle cell apoptotic process | GO:0070584 mitochondrion morphogenesis | GO:0090141 positive regulation of mitochondrial fission | GO:1900244 positive regulation of synaptic vesicle endocytosis	GO:0005739 mitochondrion | GO:0005741 mitochondrial outer membrane | GO:0005777 peroxisome | GO:0008021 synaptic vesicle | GO:0016020 membrane | GO:0016021 integral component of membrane | GO:0030054 cell junction | GO:0030672 synaptic vesicle membrane | GO:0031410 cytoplasmic vesicle | GO:0031966 mitochondrial membrane | GO:0045202 synapse	GO:0005515 protein binding | GO:0044877 protein-containing complex binding | GO:0051020 GTPase binding	-	-2.0674	5.33103	11.0214	1	5.33103	11.0214	6.25603	4.40603	550	346	209
LOC105243962	#N/A	chr1	82741983..82743775	1793	1.793	0	105243962	-	-	-	-	-	1	0.001	0.001		0	0	0	0	0	0	0
Tm4sf20	protein_coding	chr1	complement(82756649..82768456)	11808	1.503	4	66261	transmembrane 4 L six family member 20	GO:0045861 negative regulation of proteolysis	GO:0005783 endoplasmic reticulum | GO:0005789 endoplasmic reticulum membrane | GO:0005886 plasma membrane | GO:0005925 focal adhesion | GO:0016020 membrane | GO:0016021 integral component of membrane	GO:0003674 molecular_function	-	1	0.001	0.001		0	0	0	0	0	0	0
Gm19257	processed_pseudogene	chr1	complement(82776211..82777355)	1145	1.145	0	100462980	predicted gene, 19257	-	-	-	-	1	0.001	0.001		0	0	0	0	0	0	0
Gm34286	#N/A	chr1	82809628..82816424	6797	6.797	0	102637493	-	-	-	-	-	-12.9627	0.0181235	0.23493		0.0181235	0.23493	0.016735	0.0195121	38	3	3
Gm17764	processed_pseudogene	chr1	complement(82821858..82823125)	1268	1.268	0	100044526	-	-	-	-	-	1	0.001	0.001		0	0	0	0	0	0	0
Gm34450	#N/A	chr1	82824280..82836055	11776	11.776	0	102637709	-	-	-	-	-	9118	0.009118	0.001		0.009118	0	0.00321976	0.0150162	0	1	4
Agfg1	protein_coding	chr1	82839460..82901001	61542	7.94	18	15463	ArfGAP with FG repeats 1	GO:0001675 acrosome assembly | GO:0007275 multicellular organism development | GO:0007283 spermatogenesis | GO:0007289 spermatid nucleus differentiation | GO:0030154 cell differentiation | GO:0045109 intermediate filament organization	GO:0005634 nucleus | GO:0031410 cytoplasmic vesicle | GO:0042995 cell projection | GO:0043025 neuronal cell body | GO:0043231 intracellular membrane-bounded organelle	GO:0003677 DNA binding | GO:0005096 GTPase activator activity | GO:0046872 metal ion binding	mmu05164 Influenza A	-1.74388	3.58717	6.25559	1	3.58717	6.25559	3.70563	3.4687	1182	776	623
Gm7553	processed_pseudogene	chr1	complement(83002504..83004909)	2406	2.406	0	665246	predicted gene 7553	-	-	-	-	7879.45	0.00787945	0.001		0.00787945	0	0.0157589	0	0	1	0
Slc19a3	protein_coding	chr1	complement(83012523..83038859)	26337	3.543	12	80721	solute carrier family 19, member 3	GO:0015884 folic acid transport | GO:0015888 thiamine transport | GO:0051180 vitamin transport | GO:0055085 transmembrane transport | GO:0071934 thiamine transmembrane transport	GO:0005886 plasma membrane | GO:0005887 integral component of plasma membrane | GO:0016020 membrane | GO:0016021 integral component of membrane	GO:0008517 folic acid transmembrane transporter activity | GO:0015234 thiamine transmembrane transporter activity | GO:0090482 vitamin transmembrane transporter activity	mmu04977 Vitamin digestion and absorption	5350.82	0.00535082	0.001		0.00535082	0	0.0107016	0	0	1	0
Gm7539	processed_pseudogene	chr1	83015351..83016160	810	0.81	0	665196	predicted gene 7539	-	-	-	-	1	0.001	0.001		0	0	0	0	0	0	0
Krtap28-13	protein_coding	chr1	83060936..83061915	980	0.98	1	71386	-	GO:0008150 biological_process	GO:0005575 cellular_component	GO:0003674 molecular_function	-	-7.06721	0.206289	1.45789	1	0.206289	1.45789	0.232138	0.18044	34	6	4
Ccl20	protein_coding	chr1	83116744..83119167	2424	0.879	7	20297	chemokine (C-C motif) ligand 20	GO:0002548 monocyte chemotaxis | GO:0002724 regulation of T cell cytokine production | GO:0006935 chemotaxis | GO:0006954 inflammatory response | GO:0006955 immune response | GO:0007186 G protein-coupled receptor signaling pathway | GO:0030593 neutrophil chemotaxis | GO:0031640 killing of cells of other organism | GO:0035584 calcium-mediated signaling using intracellular calcium source | GO:00435…	GO:0005576 extracellular region | GO:0005615 extracellular space	GO:0005125 cytokine activity | GO:0005515 protein binding | GO:0008009 chemokine activity | GO:0031731 CCR6 chemokine receptor binding | GO:0048020 CCR chemokine receptor binding	mmu04060 Cytokine-cytokine receptor interaction | mmu04062 Chemokine signaling pathway | mmu04668 TNF signaling pathway | mmu05323 Rheumatoid arthritis	50293.3	0.0502933	0.001		0.0502933	0	0	0.100587	0	0	2
Daw1	protein_coding	chr1	83159742..83210577	50836	4.589	19	71227	dynein assembly factor with WDR repeat domains 1	GO:0003351 epithelial cilium movement involved in extracellular fluid movement | GO:0007368 determination of left/right symmetry | GO:0007507 heart development | GO:0036158 outer dynein arm assembly | GO:0090660 cerebrospinal fluid circulation	GO:0005576 extracellular region	GO:0003674 molecular_function	-	1	0.001	0.001		0	0	0	0	0	0	0
Gm6244	processed_pseudogene	chr1	complement(83212047..83212884)	838	0.838	0	621614	predicted gene 6244	-	-	-	-	1	0.001	0.001		0	0	0	0	0	0	0
Sphkap	protein_coding	chr1	complement(83255442..83408388)	152947	7.52	17	77629	SPHK1 interactor, AKAP domain containing	GO:0006928 movement of cell or subcellular component | GO:0008104 protein localization	GO:0005737 cytoplasm | GO:0005739 mitochondrion | GO:0030018 Z disc	GO:0051018 protein kinase A binding	-	47029.6	0.0470296	0.001		0.0470296	0	0	0.0940592	0	0	16
Gm6374	processed_pseudogene	chr1	83314450..83316222	1773	1.773	0	622958	predicted gene 6374	-	-	-	-	12467	0.012467	0.001		0.012467	0	0	0.0249339	0	0	1
4933436I20Rik	lncRNA	chr1	complement(83843602..83911644)	68043	68.043	0	71290	-	-	-	-	-	-2.8243	0.0181491	0.0512585		0.0181491	0.0512585	0.0122592	0.0240391	83	22	37
Pid1	protein_coding	chr1	complement(84036293..84284675)	248383	2.786	8	98496	phosphotyrosine interaction domain containing 1	GO:0001933 negative regulation of protein phosphorylation | GO:0010628 positive regulation of gene expression | GO:0042127 regulation of cell population proliferation | GO:0044320 cellular response to leptin stimulus | GO:0045944 positive regulation of transcription by RNA polymerase II | GO:0046325 negative regulation of glucose import | GO:0046627 negative regulation of insulin receptor signali…	GO:0005737 cytoplasm	GO:0005515 protein binding	-	1.70476	35.0212	20.5432	1	35.0212	20.5432	28.3893	41.6531	1362	2086	2625
Gm18304	processed_pseudogene	chr1	84168188..84168730	543	0.543	0	100416887	predicted gene, 18304	-	-	-	-	1.13446e+06	1.13446	0.001	1	1.13446	0	1.53619	0.732726	0	22	9
Mir6353	miRNA	chr1	complement(84218849..84218961)	113	0.113	0	102465181	microRNA 6353	-	-	-	-	1	0.001	0.001		0	0	0	0	0	0	0
Dner	protein_coding	chr1	complement(84369839..84696221)	326383	3.632	13	227325	delta/notch-like EGF-related receptor	GO:0007219 Notch signaling pathway | GO:0007220 Notch receptor processing | GO:0007275 multicellular organism development | GO:0010001 glial cell differentiation | GO:0030154 cell differentiation | GO:0048741 skeletal muscle fiber development	GO:0005769 early endosome | GO:0005886 plasma membrane | GO:0016020 membrane | GO:0016021 integral component of membrane | GO:0030425 dendrite | GO:0043025 neuronal cell body	GO:0005112 Notch binding | GO:0005509 calcium ion binding	-	1.50318	0.0521744	0.0347094		0.0521744	0.0347094	0.0313182	0.0730306	3	3	6
Mir5126	miRNA	chr1	84695839..84695915	77	0.077	0	100628595	microRNA 5126	-	-	-	-	1	0.001	0.001		0	0	0	0	0	0	0
Trip12	protein_coding	chr1	complement(84721189..84850008)	128820	12.041	70	14897	thyroid hormone receptor interactor 12	GO:0000209 protein polyubiquitination | GO:0006281 DNA repair | GO:0006511 ubiquitin-dependent protein catabolic process | GO:0006974 cellular response to DNA damage stimulus | GO:0045995 regulation of embryonic development | GO:1901315 negative regulation of histone H2A K63-linked ubiquitination | GO:2000779 regulation of double-strand break repair | GO:2000780 negative regulation of double-stra…	GO:0005634 nucleus | GO:0005654 nucleoplasm | GO:0016607 nuclear speck	GO:0004842 ubiquitin-protein transferase activity | GO:0008270 zinc ion binding | GO:0016740 transferase activity | GO:0046966 thyroid hormone receptor binding	mmu04120 Ubiquitin mediated proteolysis	-1.232	8.00799	9.86585	1	8.00799	9.86585	8.64373	7.37226	2827	2745	2008
Fbxo36	protein_coding	chr1	84839841..84900487	60647	1.78	6	66153	F-box protein 36	-	GO:0005575 cellular_component	GO:0003674 molecular_function	-	-39.1593	0.0319516	1.2512	1	0.0319516	1.2512	0.0639032	0	53	3	0
Slc16a14	protein_coding	chr1	complement(84905457..84935281)	29825	3.942	7	71781	solute carrier family 16 (monocarboxylic acid transporters), member 14	GO:0055085 transmembrane transport	GO:0005886 plasma membrane | GO:0016020 membrane | GO:0016021 integral component of membrane	GO:0008028 monocarboxylic acid transmembrane transporter activity | GO:0015293 symporter activity	-	1	0.001	0.001		0	0	0	0	0	0	0
LOC105243965	#N/A	chr1	84935272..84936017	746	0.746	0	105243965	-	-	-	-	-	1	0.001	0.001		0	0	0	0	0	0	0
Gm15433	#N/A	chr1	84958597..84966164	7568	3.097	2	100503433	-	-	-	-	-	6.31218	0.171293	0.0271369		0.171293	0.0271369	0	0.342586	2	0	24
Rpl19-ps1	processed_pseudogene	chr1	85012086..85012787	702	0.702	0	100039695	ribosomal protein L19, pseudogene 1	-	-	-	-	-16.803	0.170997	2.87326	1	0.170997	2.87326	0.216045	0.125948	48	4	2
Gm7582	unprocessed_pseudogene	chr1	complement(85026363..85028872)	2510	2.51	0	665317	predicted gene 7582	-	-	-	-	14.5865	0.244202	0.0167416		0.244202	0.0167416	0.453178	0.0352254	1	30	2
Gm2389	unprocessed_pseudogene	chr1	85061151..85062639	1489	1.489	0	100039723	predicted pseudogene 2389	-	-	-	-	2.02919	0.114533	0.0564425		0.114533	0.0564425	0.050928	0.178138	2	2	6
Gm18342	unprocessed_pseudogene	chr1	complement(85067647..85078223)	10577	10.577	0	100416971	predicted gene, 18342	-	-	-	-	3.15893	0.476906	0.150971		0.476906	0.150971	0.423	0.530812	38	118	127
A530032D15Rik	protein_coding	chr1	complement(85088139..85110501)	22363	4.553	14	381287	RIKEN cDNA A530032D15Rik gene	GO:0008150 biological_process	GO:0005575 cellular_component	GO:0003674 molecular_function	-	2.09243	1.19733	0.572223	1	1.19733	0.572223	0.899389	1.49528	62	108	154
Gm35498	#N/A	chr1	complement(85112445..85118523)	6079	0.516	3	102639105	-	-	-	-	-	201992	0.201992	0.001		0.201992	0	0.146961	0.257022	0	2	3
LOC102638555	#N/A	chr1	complement(85156899..85317341)	160443	2.059	6	102638555	-	-	-	-	-	1.35345	0.0828662	0.061226		0.0828662	0.061226	0.165732	0	3	9	0
LOC102638435	#N/A	chr1	85171032..85194611	23580	23.58	0	102638435	-	-	-	-	-	2.31092	0.016473	0.00712832		0.016473	0.00712832	0.0048239	0.028122	4	3	15
Gm7609	protein_coding	chr1	85199592..85215395	15804	3.327	9	665378	predicted pseudogene 7609	-	-	-	-	-2.0893	0.11486	0.239978		0.11486	0.239978	0.0569821	0.172739	19	5	13
C130026I21Rik	protein_coding	chr1	complement(85241286..85270566)	29281	2.923	20	620078	RIKEN cDNA C130026I21 gene	-	GO:0005575 cellular_component	-	-	2.18811	0.566219	0.258771		0.566219	0.258771	0.466976	0.665462	18	36	44
LOC105243967	#N/A	chr1	85248436..85272522	24087	24.087	0	105243967	-	-	-	-	-	2.07672	0.235494	0.113397		0.235494	0.113397	0.147968	0.32302	65	94	176
LOC105243966	#N/A	chr1	85272757..85276970	4214	4.214	0	105243966	-	-	-	-	-	2.31289	0.207574	0.0897469		0.207574	0.0897469	0.0269928	0.388156	9	3	37
Gm16026	transcribed_unprocessed_pseudogene	chr1	85279663..85289840	10178	1.144	7	101056250	-	-	-	-	-	1	0.001	0.001		0	0	0	0	0	0	0
LOC105243968	#N/A	chr1	complement(85332365..85346111)	13747	13.747	0	105243968	-	-	-	-	-	2.72249	0.183085	0.067249		0.183085	0.067249	0.0413718	0.324797	22	15	101
Gm2666	#N/A	chr1	complement(85483425..85527421)	43997	2.192	2	100040213	-	-	-	-	-	90792.6	0.0907926	0.001		0.0907926	0	0.121082	0.0605034	0	7	3
Gm31483	#N/A	chr1	85488288..85491727	3440	3.44	0	102633728	-	-	-	-	-	11936.6	0.0119366	0.001		0.0119366	0	0.0110221	0.0128511	0	1	1
Gm2427	unprocessed_pseudogene	chr1	85498119..85526765	28647	1.611	11	100039794	-	-	-	-	-	107812	0.107812	0.001		0.107812	0	0.0235356	0.192089	0	1	7
LOC101055758	#N/A	chr1	85536279..85555783	19505	3.681	10	101055758	-	-	-	-	-	81526.5	0.0815265	0.001		0.0815265	0	0.103004	0.0600487	0	10	5
[truncated: 45,135 more rows]

## Sheet: 1621 DEG list
Name	GeneID	FPKM - K-MoG10 (0 => 0.001)	FPKM-W_MOG10 - Mean (0 => 0.001)	FoldChange-K-MOG10/W-MOG10
[truncated: 1,621 more rows]

[truncated: 2 more sheets: 107 DEG list, Mus_musculus.GRCm38.99]
