# Supplementary material for: Microglial Nox2 Plays a Key Role in the Pathogenesis of Experimental Autoimmune Encephalomyelitis
Source: Front Immunol. 2021 Apr 2;12:638381. doi: 10.3389/fimmu.2021.638381 (PMC8050344; doi:10.3389/fimmu.2021.638381)
Supplement: Supplementary file 4 [file Table_3.xlsx]

## Sheet: Pathway
Category	PathwayID	Pathway description	Number of DEGs with pathway annotation (1621)	Number of DEGs with pathway annotation % (1621)	Up regulated	Down regulated	Number of All genes with pathway annotation (7720)	Number of All genes with pathway annotation % (7720)	P-value	Q-value	Bonferroni	Benjamini	FDR(%)	Gene(Up)	Gene(Down)
KEGG_PATHWAY	mmu05168	Herpes simplex virus 1 infection - Mus musculus (mouse)	47	0.0289944	34	13	439	0.0568653	7.16011e-07	7.6382e-06	0.000219815	9.15898e-06	0.000915898	Zfp623(78834),Zfp946(74149),Zfp777(72306),2610008E11Rik(72128),Zfp707(69020),Gm14391(665001),Zfp963(620419),Zfp235(56525),Zfp69(381549),Zfp780b(338354),Zfp128(243833),Zfp938(237411),Zfp709(236193),Zfp868(234362),Zfp958(233987),Zfp768(233890),Zfp790(233056),Zfp954(232853),Mavs(228607),Zfp90(22751),Zfp40(22700),Zfp27(22689),Zfp7(223669),Trp53(22059),Eif2b2(217715),Eif2b1(209354),Zfp87(170763),Itgb3…	Ikbke(56489),Zfp809(235047),Zfp961(234413),Pilra(231805),Zfp97(22759),Zfp677(210503),Src(20779),Ccl12(20293),Cfp(18636),H2-DMa(14998),H2-M2(14990),H2-Eb1(14969),H2-Ab1(14961),
KEGG_PATHWAY	mmu05200	Pathways in cancer - Mus musculus (mouse)	43	0.0265268	33	10	535	0.0693005	7.21835e-13	6.16026e-11	2.21603e-10	7.38677e-11	7.38677e-09	Arhgef12(69632),Smo(319757),Rasgrp3(240168),Ets1(23871),Zbtb17(22642),Trp53(22059),Tgfbr1(21812),Tgfa(21802),Mgst2(211666),Rasgrp2(19395),Pdgfb(18591),Nqo1(18104),Myc(17869),Mmp9(17395),Kitl(17311),Smad3(17127),Lrp5(16973),Kras(16653),Itga6(16403),Il3ra(16188),Il12b(16160),Igf2(16002),Igf1(16000),Hmox1(15368),Gstm5(14866),Gstm4(14865),Edn1(13614),E2f3(13557),Gadd45a(13197),Csf3r(12986),Ccnd1(1244…	Mgst3(66447),Cks2(66197),E2f2(242705),Vegfa(22339),Ptger2(19217),Nos2(18126),Gstp1(14870),Gstm2(14863),Fn1(14268),E2f1(13555),
KEGG_PATHWAY	mmu04010	MAPK signaling pathway - Mus musculus (mouse)	34	0.0209747	24	10	294	0.0380829	0.000251237	0.000769369	0.0771296	0.000922552	0.0922552	Dusp9(75590),Pdgfc(54635),Flnb(286940),Map4k2(26412),Map4k1(26411),Rasgrp3(240168),Trp53(22059),Tgfbr1(21812),Tgfa(21802),Rps6ka2(20112),Rasgrp2(19395),Hspa1a(193740),Pla2g4a(18783),Pdgfb(18591),Myc(17869),Kitl(17311),Mef2c(17260),Stmn1(16765),Kras(16653),Igf2(16002),Igf1(16000),Gadd45a(13197),Csf1(12977),Cacna1a(12286),	Dusp16(70686),Rras2(66922),Ptpn7(320139),Dusp5(240672),Vegfa(22339),Rras(20130),Mknk1(17346),Kdr(16542),Il1a(16175),Cacna1d(12289),
KEGG_PATHWAY	mmu04060	Cytokine-cytokine receptor interaction - Mus musculus (mouse)	33	0.0203578	16	17	296	0.038342	0.000105444	0.000388312	0.0323712	0.000465626	0.0465626	Tnfrsf12a(27279),Tnfsf13b(24099),Gdf15(23886),Tgfbr1(21812),Il1f9(215257),Il20rb(213208),Ccl4(20303),Ccl3(20302),Il3ra(16188),Il12b(16160),Il11ra1(16157),Cx3cr1(13051),Csf3r(12986),Csf1(12977),Cxcr2(12765),Bmpr1a(12166),	Tnfsf13(69583),Ppbp(57349),Pf4(56744),Cxcl3(330122),Tnfsf12(21944),Tnfrsf9(21942),Cxcl2(20310),Ccl7(20306),Ccl12(20293),Ccl1(20290),Cxcl9(17329),Ltb(16994),Il18r1(16182),Il1a(16175),Il18(16173),Ccr1(12768),Cd4(12504),
KEGG_PATHWAY	mmu04151	PI3K-Akt signaling pathway - Mus musculus (mouse)	28	0.0172733	22	6	358	0.0463731	2.30019e-09	9.81509e-08	7.06157e-07	1.17693e-07	1.17693e-05	Pck2(74551),Rptor(74370),Pdgfc(54635),Trp53(22059),Tgfa(21802),Creb3l2(208647),Spp1(20750),Pdgfb(18591),Myc(17869),Kitl(17311),Kras(16653),Itgb3(16416),Itga6(16403),Il3ra(16188),Igf2(16002),Igf1(16000),Csf3r(12986),Csf1(12977),Comp(12845),Ccnd1(12443),Bcl2l1(12048),Bcl2(12043),	Creb5(231991),Vegfa(22339),Thbs1(21825),Kdr(16542),Itgb7(16421),Fn1(14268),
KEGG_PATHWAY	mmu05165	Human papillomavirus infection - Mus musculus (mouse)	27	0.0166564	16	11	361	0.0467617	6.5268e-10	3.34205e-08	2.00373e-07	4.00746e-08	4.00746e-06	Atp6v1g1(66290),Pard6a(56513),Maml3(433586),Trp53(22059),Tbp(21374),Creb3l2(208647),Spp1(20750),Mfng(17305),Kras(16653),Itgb3(16416),Itga6(16403),Comp(12845),Ccnd1(12443),Atp6v0a1(11975),Ticam1(106759),Tubg1(103733),	Ikbke(56489),Hes6(55927),Slc9a3r1(26941),Atp6v0d2(242341),Creb5(231991),Vegfa(22339),Thbs1(21825),Itgb7(16421),H2-M2(14990),Fn1(14268),E2f1(13555),
KEGG_PATHWAY	mmu05166	Human T-cell leukemia virus 1 infection - Mus musculus (mouse)	27	0.0166564	17	10	246	0.0318653	0.000324715	0.000927969	0.0996874	0.00111273	0.111273	Ets1(23871),Trp53(22059),Tgfbr1(21812),Tbp(21374),Creb3l2(208647),Myc(17869),Mmp7(17393),Smad3(17127),Kras(16653),Itgb2l(16415),E2f3(13557),Cd3g(12502),Ccnd1(12443),Ccnb2(12442),Bub3(12237),Bcl2l1(12048),Cdc20(107995),	Mad2l1(56150),E2f2(242705),Creb5(231991),H2-DMa(14998),H2-M2(14990),H2-Eb1(14969),H2-Ab1(14961),E2f1(13555),Cd4(12504),Cd3e(12501),
KEGG_PATHWAY	mmu05205	Proteoglycans in cancer - Mus musculus (mouse)	26	0.0160395	14	12	206	0.0266839	0.00631767	0.0111922	1	0.0134205	1.34205	Arhgef12(69632),Smo(319757),Flnb(286940),Ezr(22350),Trp53(22059),Plau(18792),Myc(17869),Mmp9(17395),Kras(16653),Itgb3(16416),Il12b(16160),Igf2(16002),Igf1(16000),Ccnd1(12443),	Rras2(66922),Vegfa(22339),Thbs1(21825),Sdc1(20969),Src(20779),Rras(20130),Pdcd4(18569),Kdr(16542),Hpse(15442),Gpc1(14733),Fn1(14268),Cav1(12389),
KEGG_PATHWAY	mmu05418	Fluid shear stress and atherosclerosis - Mus musculus (mouse)	25	0.0154226	14	11	143	0.0185233	0.353359	0.347956	1	0.417235	41.7235	Trp53(22059),Mgst2(211666),Pdgfb(18591),Nqo1(18104),Mmp9(17395),Mef2c(17260),Klf2(16598),Itgb3(16416),Hmox1(15368),Gstm5(14866),Gstm4(14865),Edn1(13614),Bmpr1a(12166),Bcl2(12043),	Mgst3(66447),Vegfa(22339),Sdc1(20969),Src(20779),Ccl12(20293),Kdr(16542),Il1a(16175),Gstp1(14870),Gstm2(14863),Gpc1(14733),Cav1(12389),
KEGG_PATHWAY	mmu04015	Rap1 signaling pathway - Mus musculus (mouse)	22	0.0135719	16	6	214	0.0277202	0.000315236	0.00091714	0.0967775	0.00109974	0.109974	Pard6a(56513),Pdgfc(54635),Sipa1l2(244668),Rasgrp3(240168),Rapgef5(217944),Rasgrp2(19395),Pfn2(18645),Pdgfb(18591),Kitl(17311),Kras(16653),Itgb3(16416),Itgb2l(16415),Igf1(16000),Id1(15901),Csf1(12977),Arap3(106952),	Vegfa(22339),Thbs1(21825),Src(20779),Rras(20130),Kdr(16542),Adora2b(11541),
KEGG_PATHWAY	mmu04218	Cellular senescence - Mus musculus (mouse)	22	0.0135719	15	7	186	0.0240933	0.00511759	0.00922698	1	0.0110641	1.10641	Lin37(75660),Ppid(67738),Nbn(27354),Ets1(23871),Trp53(22059),Tgfbr1(21812),Mcu(215999),Serpine1(18787),Myc(17869),Smad3(17127),Kras(16653),E2f3(13557),Gadd45a(13197),Ccnd1(12443),Ccnb2(12442),	Rras2(66922),E2f2(242705),Rras(20130),Il1a(16175),H2-M2(14990),E2f1(13555),Cacna1d(12289),
KEGG_PATHWAY	mmu05202	Transcriptional misregulation in cancer - Mus musculus (mouse)	22	0.0135719	17	5	183	0.0237047	0.00644286	0.0112213	1	0.0134555	1.34555	Prcc(94315),Zbtb17(22642),Trp53(22059),Dot1l(208266),Plau(18792),Cdk14(18647),Myc(17869),Mmp9(17395),Mef2c(17260),Igf1(16000),Hpgd(15446),Gadd45a(13197),Bmi1(12151),Bcl6(12053),Bcl2l1(12048),Cebpe(110794),Etv5(104156),	Tlx3(27140),Spint1(20732),Itgb7(16421),Hhex(15242),Bcl2a1a(12044),
KEGG_PATHWAY	mmu05225	Hepatocellular carcinoma - Mus musculus (mouse)	22	0.0135719	17	5	171	0.0221503	0.0159016	0.0238083	1	0.0285485	2.85485	Trp53(22059),Tgfbr1(21812),Tgfa(21802),Mgst2(211666),Nqo1(18104),Myc(17869),Smad3(17127),Lrp5(16973),Kras(16653),Igf2(16002),Hmox1(15368),Gstm5(14866),Gstm4(14865),E2f3(13557),Gadd45a(13197),Ccnd1(12443),Bcl2l1(12048),	Mgst3(66447),E2f2(242705),Gstp1(14870),Gstm2(14863),E2f1(13555),
KEGG_PATHWAY	mmu04144	Endocytosis - Mus musculus (mouse)	21	0.012955	18	3	270	0.0349741	2.20062e-07	3.3142e-06	6.7559e-05	3.97406e-06	0.000397406	Snx4(69150),Vps28(66914),Pard6a(56513),Rab11a(53869),Agap1(347722),Bin1(30948),Rab11fip4(268451),Tgfbr1(21812),Acap1(216859),Sh3gl1(20405),Hspa1a(193740),Cyth2(19158),Nedd4(17999),Smad3(17127),Folr2(14276),Epn2(13855),Cxcr2(12765),Arap3(106952),	Src(20779),H2-M2(14990),Cav1(12389),
KEGG_PATHWAY	mmu04640	Hematopoietic cell lineage - Mus musculus (mouse)	21	0.012955	12	9	95	0.0123057	1	0.833958	1	1	100	Siglech(233274),Kitl(17311),Itgb3(16416),Itga6(16403),Il3ra(16188),Il11ra1(16157),Gp1bb(14724),Csf3r(12986),Csf1(12977),Cd9(12527),Cd3g(12502),Cd34(12490),	Anpep(16790),Il1a(16175),H2-DMa(14998),H2-Eb1(14969),H2-Ab1(14961),Cd4(12504),Cd3e(12501),Cd38(12494),Cd1d1(12479),
KEGG_PATHWAY	mmu04714	Thermogenesis - Mus musculus (mouse)	20	0.0123381	15	5	232	0.0300518	9.08885e-06	5.50732e-05	0.00279028	6.60384e-05	0.00660384	Ndufaf2(75597),Rptor(74370),Acsl3(74205),Cox11(69802),Ndufaf5(69487),Cox19(68033),Ndufb7(66916),Ndufaf3(66706),Ndufa7(66416),Cox20(66359),Ndufa9(66108),Mgll(23945),Creb3l2(208647),Rps6ka2(20112),Kras(16653),	Ndufb4(68194),Slc25a20(57279),Coa3(52469),Creb5(231991),Acsl1(14081),
KEGG_PATHWAY	mmu05152	Tuberculosis - Mus musculus (mouse)	20	0.0123381	9	11	178	0.023057	0.00303511	0.0058426	0.93178	0.00700587	0.700587	Arhgef12(69632),Rfxap(170767),Itgb2l(16415),Itgax(16411),Il12b(16160),Camp(12796),Plk3(12795),Bcl2(12043),Atp6v0a1(11975),	Fcgr4(246256),Atp6v0d2(242341),Src(20779),Nos2(18126),Il1a(16175),Il18(16173),H2-DMa(14998),H2-Eb1(14969),H2-Ab1(14961),Fcgr2b(14130),Ciita(12265),
KEGG_PATHWAY	mmu05163	Human cytomegalovirus infection - Mus musculus (mouse)	20	0.0123381	11	9	256	0.0331606	4.1545e-07	4.62459e-06	0.000127543	5.54536e-06	0.000554536	Arhgef12(69632),Trp53(22059),Creb3l2(208647),Ccl4(20303),Ccl3(20302),Myc(17869),Kras(16653),Itgb3(16416),E2f3(13557),Cxcr2(12765),Ccnd1(12443),	E2f2(242705),Creb5(231991),Vegfa(22339),Src(20779),Ccl12(20293),Ptger2(19217),H2-M2(14990),E2f1(13555),Ccr1(12768),
KEGG_PATHWAY	mmu05169	Epstein-Barr virus infection - Mus musculus (mouse)	20	0.0123381	10	10	230	0.0297927	1.23979e-05	6.75357e-05	0.00380616	8.09822e-05	0.00809822	Mavs(228607),Trp53(22059),Nedd4(17999),Myc(17869),Blnk(17060),E2f3(13557),Gadd45a(13197),Cd3g(12502),Ccnd1(12443),Bcl2(12043),	Ikbke(56489),E2f2(242705),H2-DMa(14998),H2-M2(14990),H2-Eb1(14969),H2-Ab1(14961),E2f1(13555),Cd3e(12501),Entpd1(12495),Runx3(12399),
KEGG_PATHWAY	mmu04510	Focal adhesion - Mus musculus (mouse)	19	0.0117212	12	7	199	0.0257772	0.000176894	0.000608062	0.0543063	0.000729128	0.0729128	Parva(57342),Pdgfc(54635),Flnb(286940),Spp1(20750),Pdgfb(18591),Itgb3(16416),Itga6(16403),Igf1(16000),Comp(12845),Ccnd1(12443),Bcl2(12043),Arhgap5(11855),	Vegfa(22339),Thbs1(21825),Src(20779),Kdr(16542),Itgb7(16421),Fn1(14268),Cav1(12389),
KEGG_PATHWAY	mmu04514	Cell adhesion molecules (CAMs) - Mus musculus (mouse)	19	0.0117212	9	10	171	0.0221503	0.00339516	0.00634487	1	0.00760814	0.760814	Jam2(67374),Cldn15(60363),Cadm1(54725),Sell(20343),Ptprm(19274),Pdcd1(18566),Itgb2l(16415),Itga6(16403),Cd34(12490),	Cd274(60533),Sdc1(20969),Ntng2(171171),Itgb7(16421),H2-DMa(14998),H2-M2(14990),H2-Eb1(14969),H2-Ab1(14961),Vcan(13003),Cd4(12504),
KEGG_PATHWAY	mmu04621	NOD-like receptor signaling pathway - Mus musculus (mouse)	19	0.0117212	9	10	206	0.0266839	7.45378e-05	0.00029818	0.0228831	0.000357548	0.0357548	Gabarapl2(93739),Mavs(228607),Mcu(215999),Mfn2(170731),Gbp2b(14468),Camp(12796),Bcl2l1(12048),Bcl2(12043),Ticam1(106759),	Ikbke(56489),Cxcl3(330122),Gbp7(229900),Gbp5(229898),Cxcl2(20310),Ccl12(20293),Nlrp1a(195046),Il18(16173),Gbp2(14469),Cybb(13058),
KEGG_PATHWAY	mmu04810	Regulation of actin cytoskeleton - Mus musculus (mouse)	19	0.0117212	14	5	217	0.0281088	2.34044e-05	0.000119842	0.00718516	0.000143703	0.0143703	Arhgef12(69632),Pdgfc(54635),Ezr(22350),Spata13(219140),Pfn2(18645),Pdgfb(18591),Kras(16653),Itgb3(16416),Itgb2l(16415),Itgax(16411),Itga6(16403),Cfl2(12632),Pip4k2c(117150),Nckap1l(105855),	Rras2(66922),Src(20779),Rras(20130),Itgb7(16421),Fn1(14268),
KEGG_PATHWAY	mmu05203	Viral carcinogenesis - Mus musculus (mouse)	19	0.0117212	13	6	231	0.0299223	3.76114e-06	2.60256e-05	0.00115467	3.12073e-05	0.00312073	Hdac9(79221),Hist1h2bq(665596),Trp53(22059),Tbp(21374),Gtf2h3(209357),Creb3l2(208647),Hdac10(170787),Kras(16653),Hdac6(15185),Ddx3x(13205),Ccnd1(12443),Cdc20(107995),Hist1h4m(100041230),	Hist1h2br(665622),Atp6v0d2(242341),Creb5(231991),Src(20779),H2-M2(14990),Gtf2h4(14885),
KEGG_PATHWAY	mmu00230	Purine metabolism - Mus musculus (mouse)	18	0.0111043	9	9	136	0.0176166	0.0404671	0.0515453	1	0.061808	6.1808	Pfas(237823),Pde2a(207728),Enpp1(18605),Pde1b(18574),Nme7(171567),Ak1(11636),Adk(11534),Prps2(110639),Gmpr2(105446),	Adprm(66358),Nudt5(53893),Nt5c(50773),Pde7b(29863),Dguok(27369),Papss2(23972),Impdh1(23917),Pde4b(18578),Entpd1(12495),
KEGG_PATHWAY	mmu04014	Ras signaling pathway - Mus musculus (mouse)	18	0.0111043	14	4	233	0.0301813	1.09852e-06	1.12499e-05	0.000337246	1.34898e-05	0.00134898	Pdgfc(54635),Rasgrp3(240168),Ets1(23871),Tgfa(21802),Rapgef5(217944),Rasgrp2(19395),Pla2g4a(18783),Pdgfb(18591),Kitl(17311),Kras(16653),Igf2(16002),Igf1(16000),Csf1(12977),Bcl2l1(12048),	Rras2(66922),Vegfa(22339),Rras(20130),Kdr(16542),
KEGG_PATHWAY	mmu05161	Hepatitis B - Mus musculus (mouse)	18	0.0111043	13	5	163	0.021114	0.00373922	0.00688729	1	0.00825856	0.825856	Mavs(228607),Trp53(22059),Tgfbr1(21812),Creb3l2(208647),Pcna(18538),Myc(17869),Mmp9(17395),Smad3(17127),Kras(16653),E2f3(13557),Ddx3x(13205),Bcl2(12043),Ticam1(106759),	Ikbke(56489),E2f2(242705),Creb5(231991),Src(20779),E2f1(13555),
KEGG_PATHWAY	mmu05167	Kaposi sarcoma-associated herpesvirus infection - Mus musculus (mouse)	18	0.0111043	9	9	217	0.0281088	9.89501e-06	5.50732e-05	0.00303777	6.60384e-05	0.00660384	Gabarapl2(93739),Rcan1(54720),Trp53(22059),Pdgfb(18591),Myc(17869),Kras(16653),E2f3(13557),Ccnd1(12443),Ticam1(106759),	Ikbke(56489),Cxcl3(330122),E2f2(242705),Vegfa(22339),Src(20779),Cxcl2(20310),H2-M2(14990),E2f1(13555),Ccr1(12768),
KEGG_PATHWAY	mmu05215	Prostate cancer - Mus musculus (mouse)	18	0.0111043	13	5	97	0.0125648	0.61809	0.571287	1	0.685031	68.5031	Pdgfc(54635),Trp53(22059),Tgfa(21802),Creb3l2(208647),Plau(18792),Pdgfb(18591),Mmp9(17395),Kras(16653),Igf1(16000),E2f3(13557),Ccnd1(12443),Bcl2(12043),Etv5(104156),	E2f2(242705),Creb5(231991),Spint1(20732),Gstp1(14870),E2f1(13555),
KEGG_PATHWAY	mmu03013	RNA transport - Mus musculus (mouse)	17	0.0104874	13	4	167	0.0216321	0.00108476	0.002415	0.333021	0.00289583	0.289583	Ndc1(72787),Rpp25l(69961),Rae1(66679),Phax(56698),Prmt5(27374),Aaas(223921),Eif2b2(217715),Eif2b1(209354),Rpp40(208366),Nup88(19069),Eif2b4(13667),Pop5(117109),Eif2b3(108067),	Pop7(74097),Elac2(68626),Elac1(114615),Thoc5(107829),
KEGG_PATHWAY	mmu04061	Viral protein interaction with cytokine and cytokine receptor - Mus musculus (mouse)	17	0.0104874	6	11	103	0.013342	0.328714	0.327071	1	0.392191	39.2191	Il20rb(213208),Ccl4(20303),Ccl3(20302),Cx3cr1(13051),Csf1(12977),Cxcr2(12765),	Ppbp(57349),Pf4(56744),Cxcl3(330122),Cxcl2(20310),Ccl7(20306),Ccl12(20293),Ccl1(20290),Cxcl9(17329),Il18r1(16182),Il18(16173),Ccr1(12768),
KEGG_PATHWAY	mmu04062	Chemokine signaling pathway - Mus musculus (mouse)	17	0.0104874	7	10	200	0.0259067	2.51954e-05	0.000124256	0.00773498	0.000148995	0.0148995	Ccl4(20303),Ccl3(20302),Rasgrp2(19395),Kras(16653),Itk(16428),Cx3cr1(13051),Cxcr2(12765),	Ppbp(57349),Pf4(56744),Cxcl3(330122),Src(20779),Cxcl2(20310),Ccl7(20306),Ccl12(20293),Ccl1(20290),Cxcl9(17329),Ccr1(12768),
KEGG_PATHWAY	mmu04068	FoxO signaling pathway - Mus musculus (mouse)	17	0.0104874	16	1	132	0.0170984	0.0368812	0.0472125	1	0.0566126	5.66126	Gabarapl2(93739),Pck2(74551),Csnk1e(27373),Tgfbr1(21812),Plk4(20873),Smad3(17127),Kras(16653),Klf2(16598),Igf1(16000),Prmt1(15469),S1pr1(13609),Gadd45a(13197),Plk3(12795),Ccnd1(12443),Ccnb2(12442),Bcl6(12053),	Fbxo32(67731),
KEGG_PATHWAY	mmu04145	Phagosome - Mus musculus (mouse)	17	0.0104874	6	11	181	0.0234456	0.000268821	0.000800291	0.0825282	0.00095963	0.095963	Atp6v1g1(66290),Marco(17167),Itgb3(16416),Itgb2l(16415),Comp(12845),Atp6v0a1(11975),	C1ra(50909),Fcgr4(246256),Atp6v0d2(242341),Thbs1(21825),H2-DMa(14998),H2-M2(14990),H2-Eb1(14969),H2-Ab1(14961),Fcgr2b(14130),Colec12(140792),Cybb(13058),
KEGG_PATHWAY	mmu05323	Rheumatoid arthritis - Mus musculus (mouse)	17	0.0104874	6	11	84	0.0108808	0.791847	0.71637	1	0.859	85.9	Atp6v1g1(66290),Tnfsf13b(24099),Ccl3(20302),Itgb2l(16415),Csf1(12977),Atp6v0a1(11975),	Tnfsf13(69583),Atp6v0d2(242341),Vegfa(22339),Ccl12(20293),Ltb(16994),Il1a(16175),Il18(16173),H2-DMa(14998),H2-Eb1(14969),H2-Ab1(14961),Acp5(11433),
KEGG_PATHWAY	mmu04110	Cell cycle - Mus musculus (mouse)	16	0.00987045	13	3	123	0.0159326	0.0415229	0.0521123	1	0.062488	6.2488	Dbf4(27214),Zbtb17(22642),Trp53(22059),Pcna(18538),Myc(17869),Mcm5(17218),Smad3(17127),E2f3(13557),Gadd45a(13197),Ccnd1(12443),Ccnb2(12442),Bub3(12237),Cdc20(107995),	Mad2l1(56150),E2f2(242705),E2f1(13555),
KEGG_PATHWAY	mmu04530	Tight junction - Mus musculus (mouse)	15	0.00925355	11	4	167	0.0216321	0.000224827	0.000710635	0.069022	0.000852124	0.0852124	Tjap1(74094),Jam2(67374),Cldn15(60363),Pard6a(56513),Ezr(22350),Tjp2(21873),Tjp1(21872),Pcna(18538),Nedd4(17999),Ccnd1(12443),Arhgef18(102098),	Slc9a3r1(26941),Src(20779),Cd1d1(12479),Cacna1d(12289),
KEGG_PATHWAY	mmu00980	Metabolism of xenobiotics by cytochrome P450 - Mus musculus (mouse)	14	0.00863664	9	5	66	0.00854922	1	0.833958	1	1	100	Hpgds(54486),Ugt1a5(394433),Mgst2(211666),Hsd11b1(15483),Gstm5(14866),Gstm4(14865),Ephx1(13849),Cbr1(12408),Cbr3(109857),	Mgst3(66447),Ugt1a6b(394435),Gstp1(14870),Gstm2(14863),Akr7a5(110198),
KEGG_PATHWAY	mmu03008	Ribosome biogenesis in eukaryotes - Mus musculus (mouse)	14	0.00863664	12	2	116	0.0150259	0.0259249	0.0345699	1	0.0414528	4.14528	Rrp7a(74778),Rpp25l(69961),Gar1(68147),Nob1(67619),Nop56(67134),Sbds(66711),Dkc1(245474),Rpp40(208366),Fbl(14113),Pop5(117109),Pwp2(110816),Mdn1(100019),	Pop7(74097),Utp18(217109),
KEGG_PATHWAY	mmu04024	cAMP signaling pathway - Mus musculus (mouse)	14	0.00863664	7	7	213	0.0275907	2.71699e-07	3.47809e-06	8.34117e-05	4.17059e-06	0.000417059	Hcar2(80885),Ffar2(233079),Creb3l2(208647),Edn1(13614),Fxyd2(11936),Atp1b1(11931),Arap3(106952),	Rras2(66922),Creb5(231991),Rras(20130),Ptger2(19217),Pde4b(18578),Cacna1d(12289),Npy(109648),
KEGG_PATHWAY	mmu05164	Influenza A - Mus musculus (mouse)	14	0.00863664	6	8	164	0.0212435	0.000178126	0.000608062	0.0546846	0.000729128	0.0729128	Rae1(66679),Cpsf4(54188),Rab11a(53869),Mavs(228607),Il12b(16160),Ticam1(106759),	Ikbke(56489),Ccl12(20293),Il1a(16175),Il18(16173),H2-DMa(14998),H2-Eb1(14969),H2-Ab1(14961),Ciita(12265),
KEGG_PATHWAY	mmu05222	Small cell lung cancer - Mus musculus (mouse)	14	0.00863664	9	5	92	0.0119171	0.196214	0.210128	1	0.251965	25.1965	Zbtb17(22642),Trp53(22059),Myc(17869),Itga6(16403),E2f3(13557),Gadd45a(13197),Ccnd1(12443),Bcl2l1(12048),Bcl2(12043),	Cks2(66197),E2f2(242705),Nos2(18126),Fn1(14268),E2f1(13555),
KEGG_PATHWAY	mmu00480	Glutathione metabolism - Mus musculus (mouse)	13	0.00801974	9	4	64	0.00829016	0.878974	0.786851	1	0.943514	94.3514	Chac1(69065),Hpgds(54486),Ggt5(23887),Mgst2(211666),Srm(20810),Gstm5(14866),Gstm4(14865),Gclm(14630),Gclc(14629),	Mgst3(66447),Anpep(16790),Gstp1(14870),Gstm2(14863),
KEGG_PATHWAY	mmu04066	HIF-1 signaling pathway - Mus musculus (mouse)	13	0.00801974	7	6	114	0.0147668	0.0174796	0.0257196	1	0.0308405	3.08405	Pdhb(68263),Serpine1(18787),Ldhb(16832),Igf1(16000),Hmox1(15368),Edn1(13614),Bcl2(12043),	Pfkp(56421),Vegfa(22339),Nos2(18126),Mknk1(17346),Cybb(13058),Aldoc(11676),
KEGG_PATHWAY	mmu04371	Apelin signaling pathway - Mus musculus (mouse)	13	0.00801974	9	4	139	0.0180052	0.00109638	0.00241983	0.336587	0.00290162	0.290162	Gabarapl2(93739),Tgfbr1(21812),Spp1(20750),Serpine1(18787),Mef2c(17260),Smad3(17127),Kras(16653),Klf2(16598),Ccnd1(12443),	Pik3r4(75669),Rras2(66922),Rras(20130),Nos2(18126),
KEGG_PATHWAY	mmu04630	JAK-STAT signaling pathway - Mus musculus (mouse)	13	0.00801974	12	1	165	0.0213731	5.14345e-05	0.000212395	0.0157904	0.000254684	0.0254684	Socs4(67296),Pias3(229615),Il20rb(213208),Pdgfb(18591),Myc(17869),Il3ra(16188),Il12b(16160),Il11ra1(16157),Csf3r(12986),Ccnd1(12443),Bcl2l1(12048),Bcl2(12043),	Socs1(12703),
KEGG_PATHWAY	mmu04919	Thyroid hormone signaling pathway - Mus musculus (mouse)	13	0.00801974	10	3	118	0.015285	0.013667	0.0209527	1	0.0251244	2.51244	Med30(69790),Rcan1(54720),Med17(234959),Trp53(22059),Myc(17869),Kras(16653),Itgb3(16416),Ccnd1(12443),Fxyd2(11936),Atp1b1(11931),	Med27(68975),Pfkp(56421),Src(20779),
KEGG_PATHWAY	mmu05145	Toxoplasmosis - Mus musculus (mouse)	13	0.00801974	6	7	108	0.0139896	0.0291294	0.0386417	1	0.0463353	4.63353	Hspa1a(193740),Itga6(16403),Il12b(16160),Bcl2l1(12048),Bcl2(12043),Alox5(11689),	Nos2(18126),H2-DMa(14998),H2-Eb1(14969),H2-Ab1(14961),Socs1(12703),Ciita(12265),Ppif(105675),
KEGG_PATHWAY	mmu01524	Platinum drug resistance - Mus musculus (mouse)	12	0.00740284	8	4	77	0.00997409	0.259559	0.265078	1	0.317856	31.7856	Polh(80905),Trp53(22059),Mgst2(211666),Gstm5(14866),Gstm4(14865),Ercc1(13870),Bcl2l1(12048),Bcl2(12043),	Mgst3(66447),Xpa(22590),Gstp1(14870),Gstm2(14863),
KEGG_PATHWAY	mmu04072	Phospholipase D signaling pathway - Mus musculus (mouse)	12	0.00740284	8	4	149	0.0193005	0.000190968	0.000626829	0.0586273	0.000751632	0.0751632	Pdgfc(54635),Dgkd(227333),Cyth2(19158),Pla2g4a(18783),Pdgfb(18591),Kitl(17311),Kras(16653),Cxcr2(12765),	Agpat4(68262),Agpat2(67512),Rras2(66922),Rras(20130),
KEGG_PATHWAY	mmu04115	p53 signaling pathway - Mus musculus (mouse)	12	0.00740284	11	1	71	0.00919689	0.462769	0.445415	1	0.534098	53.4098	Perp(64058),Zmat3(22401),Trp53(22059),Siah1a(20437),Serpine1(18787),Igf1(16000),Gadd45a(13197),Ccnd1(12443),Ccnb2(12442),Bcl2l1(12048),Bcl2(12043),	Thbs1(21825),
KEGG_PATHWAY	mmu04146	Peroxisome - Mus musculus (mouse)	12	0.00740284	9	3	84	0.0108808	0.171839	0.185633	1	0.222593	22.2593	Acsl3(74205),Crot(74114),Hacl1(56794),Ech1(51798),Abcd2(26874),Eci2(23986),Pex7(18634),Mvk(17855),Pex12(103737),	Nos2(18126),Acsl1(14081),Nudt19(110959),
KEGG_PATHWAY	mmu04360	Axon guidance - Mus musculus (mouse)	12	0.00740284	6	6	180	0.0233161	2.61873e-06	2.16278e-05	0.000803951	2.59339e-05	0.00259339	Arhgef12(69632),Pard6a(56513),Smo(319757),Sema7a(20361),Kras(16653),Cfl2(12632),	Ntn4(57764),Src(20779),Sema4b(20352),Rras(20130),Nck2(17974),Ntng2(171171),
KEGG_PATHWAY	mmu04380	Osteoclast differentiation - Mus musculus (mouse)	12	0.00740284	4	8	128	0.0165803	0.00211231	0.00422504	0.64848	0.00506625	0.506625	Tgfbr1(21812),Blnk(17060),Itgb3(16416),Csf1(12977),	Sirpb1a(320832),Fcgr4(246256),Pira2(18725),Il1a(16175),Fcgr2b(14130),Socs1(12703),Acp5(11433),Gm15448(100041146),
KEGG_PATHWAY	mmu04390	Hippo signaling pathway - Mus musculus (mouse)	12	0.00740284	12	0	154	0.0199482	0.000101527	0.000384048	0.0311689	0.000460512	0.0460512	Wwtr1(97064),Pard6a(56513),Csnk1e(27373),Tgfbr1(21812),Trp53bp2(209456),Serpine1(18787),Myc(17869),Smad3(17127),Itgb2l(16415),Id1(15901),Ccnd1(12443),Bmpr1a(12166),	-
KEGG_PATHWAY	mmu04910	Insulin signaling pathway - Mus musculus (mouse)	12	0.00740284	8	4	140	0.0181347	0.000467919	0.00122244	0.143651	0.00146583	0.146583	Pck2(74551),Rptor(74370),Socs4(67296),Ppp1r3b(244416),Ppp1r3d(228966),Pygm(19309),Kras(16653),Fasn(14104),	Mknk1(17346),Socs1(12703),Trip10(106628),Ppp1r3e(105651),
KEGG_PATHWAY	mmu04933	AGE-RAGE signaling pathway in diabetic complications - Mus musculus (mouse)	12	0.00740284	7	5	101	0.0130829	0.0326072	0.0425932	1	0.0510736	5.10736	Tgfbr1(21812),Serpine1(18787),Smad3(17127),Kras(16653),Edn1(13614),Ccnd1(12443),Bcl2(12043),	Vegfa(22339),Ccl12(20293),Il1a(16175),Fn1(14268),Cybb(13058),
KEGG_PATHWAY	mmu05034	Alcoholism - Mus musculus (mouse)	12	0.00740284	7	5	199	0.0257772	1.65245e-07	2.66449e-06	5.07302e-05	3.19499e-06	0.000319499	Hdac9(79221),Hist1h2bq(665596),Creb3l2(208647),Hdac10(170787),Kras(16653),Hdac6(15185),Hist1h4m(100041230),	Hist1h2br(665622),Slc29a1(63959),Creb5(231991),Adora2b(11541),Npy(109648),
KEGG_PATHWAY	mmu05160	Hepatitis C - Mus musculus (mouse)	12	0.00740284	9	3	160	0.0207254	3.73292e-05	0.000173768	0.0114601	0.000208365	0.0208365	Cldn15(60363),Mavs(228607),Trp53(22059),Myc(17869),Kras(16653),E2f3(13557),Cd81(12520),Ccnd1(12443),Ticam1(106759),	Ikbke(56489),E2f2(242705),E2f1(13555),
KEGG_PATHWAY	mmu05162	Measles - Mus musculus (mouse)	12	0.00740284	8	4	144	0.0186528	0.000252425	0.000769369	0.0774944	0.000922552	0.0922552	Mavs(228607),Trp53(22059),Hspa1a(193740),Il12b(16160),Cd3g(12502),Ccnd1(12443),Bcl2l1(12048),Bcl2(12043),	Ikbke(56489),Il1a(16175),Fcgr2b(14130),Cd3e(12501),
KEGG_PATHWAY	mmu05204	Chemical carcinogenesis - Mus musculus (mouse)	12	0.00740284	8	4	94	0.0121762	0.0687043	0.083762	1	0.100439	10.0439	Hpgds(54486),Ugt1a5(394433),Mgst2(211666),Hsd11b1(15483),Gstm5(14866),Gstm4(14865),Ephx1(13849),Cbr1(12408),	Mgst3(66447),Ugt1a6b(394435),Gstp1(14870),Gstm2(14863),
KEGG_PATHWAY	mmu05212	Pancreatic cancer - Mus musculus (mouse)	12	0.00740284	9	3	75	0.00971503	0.316838	0.318112	1	0.381449	38.1449	Trp53(22059),Tgfbr1(21812),Tgfa(21802),Smad3(17127),Kras(16653),E2f3(13557),Gadd45a(13197),Ccnd1(12443),Bcl2l1(12048),	E2f2(242705),Vegfa(22339),E2f1(13555),
KEGG_PATHWAY	mmu05226	Gastric cancer - Mus musculus (mouse)	12	0.00740284	10	2	150	0.0194301	0.000134564	0.000471942	0.0413112	0.000565907	0.0565907	Trp53(22059),Tgfbr1(21812),Myc(17869),Smad3(17127),Lrp5(16973),Kras(16653),E2f3(13557),Gadd45a(13197),Ccnd1(12443),Bcl2(12043),	E2f2(242705),E2f1(13555),
KEGG_PATHWAY	mmu00270	Cysteine and methionine metabolism - Mus musculus (mouse)	11	0.00678593	10	1	52	0.00673575	1	0.833958	1	1	100	Mtap(66902),Mat2a(232087),Srm(20810),Mdh1(17449),Ldhb(16832),Gclm(14630),Gclc(14629),Bcat2(12036),Amd1(11702),Psat1(107272),	Il4i1(14204),
KEGG_PATHWAY	mmu01521	EGFR tyrosine kinase inhibitor resistance - Mus musculus (mouse)	11	0.00678593	8	3	80	0.0103627	0.125136	0.141136	1	0.169237	16.9237	Pdgfc(54635),Tgfa(21802),Pdgfb(18591),Kras(16653),Igf1(16000),Gas6(14456),Bcl2l1(12048),Bcl2(12043),	Vegfa(22339),Src(20779),Kdr(16542),
KEGG_PATHWAY	mmu03010	Ribosome - Mus musculus (mouse)	11	0.00678593	7	4	175	0.0226684	1.74668e-06	1.54205e-05	0.00053623	1.84907e-05	0.00184907	Mrpl34(94065),Mrpl16(94063),Rpl22l1(68028),Mrps21(66292),Mrpl12(56282),Mrpl17(27397),Mrps12(24030),	Mrpl14(68463),Mrps16(66242),Mrpl22(216767),Mrps6(121022),
KEGG_PATHWAY	mmu04022	cGMP-PKG signaling pathway - Mus musculus (mouse)	11	0.00678593	8	3	173	0.0224093	2.49808e-06	2.13191e-05	0.000766912	2.55637e-05	0.00255637	Gtf2ird1(57080),Creb3l2(208647),Pde2a(207728),Mef2c(17260),Gtf2i(14886),Fxyd2(11936),Atp1b1(11931),Adora3(11542),	Creb5(231991),Cacna1d(12289),Ppif(105675),
KEGG_PATHWAY	mmu04137	Mitophagy - animal - Mus musculus (mouse)	11	0.00678593	5	6	63	0.00816062	0.533982	0.504773	1	0.605274	60.5274	Gabarapl2(93739),Trp53(22059),Mfn2(170731),Kras(16653),Bcl2l1(12048),	Rras2(66922),Tomm7(66169),Rhot2(214952),Src(20779),Rras(20130),E2f1(13555),
KEGG_PATHWAY	mmu04141	Protein processing in endoplasmic reticulum - Mus musculus (mouse)	11	0.00678593	10	1	163	0.021114	9.75945e-06	5.50732e-05	0.00299615	6.60384e-05	0.00660384	Ubqln4(94232),Sil1(81500),Ube2g2(22213),Ckap4(216197),Ssr4(20832),Hspa1a(193740),Ppp1r15a(17872),Cryab(12955),Bcl2(12043),Edem2(108687),	Hspbp1(66245),
KEGG_PATHWAY	mmu04142	Lysosome - Mus musculus (mouse)	11	0.00678593	7	4	124	0.0160622	0.00121344	0.00265531	0.372526	0.00318398	0.318398	Arsg(74008),Smpd1(20597),Hexb(15212),Ctse(13034),Glb1(12091),Atp6v0a1(11975),Arsb(11881),	Ap4b1(67489),Atp6v0d2(242341),Ap4m1(11781),Acp5(11433),
KEGG_PATHWAY	mmu04150	mTOR signaling pathway - Mus musculus (mouse)	11	0.00678593	10	1	155	0.0200777	2.63844e-05	0.000127454	0.00810001	0.00015283	0.015283	Lamtor2(83409),Tti1(75425),Rptor(74370),Lamtor5(68576),Tbc1d7(67046),Atp6v1g1(66290),Rps6ka2(20112),Lrp5(16973),Kras(16653),Igf1(16000),	Deptor(97998),
KEGG_PATHWAY	mmu04926	Relaxin signaling pathway - Mus musculus (mouse)	11	0.00678593	6	5	131	0.0169689	0.00067343	0.00165952	0.206743	0.00198994	0.198994	Tgfbr1(21812),Creb3l2(208647),Mmp9(17395),Smad3(17127),Kras(16653),Edn1(13614),	Creb5(231991),Vegfa(22339),Src(20779),Nos2(18126),Mmp13(17386),
KEGG_PATHWAY	mmu05016	Huntington disease - Mus musculus (mouse)	11	0.00678593	8	3	194	0.0251295	1.03518e-07	2.2086e-06	3.178e-05	2.64834e-06	0.000264834	Taf4b(72504),Ndufb7(66916),Ndufa7(66416),Ndufa9(66108),Polr2h(245841),Trp53(22059),Tbp(21374),Creb3l2(208647),	Ndufb4(68194),Creb5(231991),Ppif(105675),
KEGG_PATHWAY	mmu05132	Salmonella infection - Mus musculus (mouse)	11	0.00678593	6	5	78	0.0101036	0.157319	0.172866	1	0.207284	20.7284	Tlr5(53791),Flnb(286940),Tjp1(21872),Ccl4(20303),Ccl3(20302),Pfn2(18645),	Cxcl3(330122),Cxcl2(20310),Nos2(18126),Il1a(16175),Il18(16173),
KEGG_PATHWAY	mmu05219	Bladder cancer - Mus musculus (mouse)	11	0.00678593	6	5	41	0.00531088	0.709841	0.646752	1	0.775521	77.5521	Trp53(22059),Myc(17869),Mmp9(17395),Kras(16653),E2f3(13557),Ccnd1(12443),	E2f2(242705),Vegfa(22339),Thbs1(21825),Src(20779),E2f1(13555),
KEGG_PATHWAY	mmu05220	Chronic myeloid leukemia - Mus musculus (mouse)	11	0.00678593	9	2	76	0.00984456	0.196976	0.210128	1	0.251965	25.1965	Trp53(22059),Tgfbr1(21812),Myc(17869),Smad3(17127),Kras(16653),E2f3(13557),Gadd45a(13197),Ccnd1(12443),Bcl2l1(12048),	E2f2(242705),E2f1(13555),
KEGG_PATHWAY	mmu00190	Oxidative phosphorylation - Mus musculus (mouse)	10	0.00616903	7	3	134	0.0173575	0.000133931	0.000471942	0.0411167	0.000565907	0.0565907	Ppa2(74776),Cox11(69802),Ndufb7(66916),Ndufa7(66416),Atp6v1g1(66290),Ndufa9(66108),Atp6v0a1(11975),	Ndufb4(68194),Ppa1(67895),Atp6v0d2(242341),
KEGG_PATHWAY	mmu00983	Drug metabolism - other enzymes - Mus musculus (mouse)	10	0.00616903	5	5	87	0.0112694	0.0410557	0.0517798	1	0.0620892	6.20892	Ugt1a5(394433),Mgst2(211666),Nme7(171567),Gstm5(14866),Gstm4(14865),	Mgst3(66447),Ugt1a6b(394435),Impdh1(23917),Gstp1(14870),Gstm2(14863),
KEGG_PATHWAY	mmu01522	Endocrine resistance - Mus musculus (mouse)	10	0.00616903	7	3	93	0.0120466	0.024306	0.0331008	1	0.0396912	3.96912	Trp53(22059),Mmp9(17395),Kras(16653),Igf1(16000),E2f3(13557),Ccnd1(12443),Bcl2(12043),	E2f2(242705),Src(20779),E2f1(13555),
KEGG_PATHWAY	mmu03420	Nucleotide excision repair - Mus musculus (mouse)	10	0.00616903	7	3	43	0.00556995	1	0.833958	1	1	100	Rfc3(69263),Pole4(66979),Cetn2(26370),Gtf2h3(209357),Pold1(18971),Pcna(18538),Ercc1(13870),	Ercc5(22592),Xpa(22590),Gtf2h4(14885),
KEGG_PATHWAY	mmu04020	Calcium signaling pathway - Mus musculus (mouse)	10	0.00616903	5	5	194	0.0251295	3.02245e-08	7.73823e-07	9.27892e-06	9.27892e-07	9.27892e-05	Asph(65973),Mcu(215999),Tacr2(21337),Pde1b(18574),Cacna1a(12286),	Nos2(18126),Cd38(12494),Cacna1d(12289),Adora2b(11541),Ppif(105675),
KEGG_PATHWAY	mmu04064	NF-kappa B signaling pathway - Mus musculus (mouse)	10	0.00616903	7	3	109	0.0141192	0.00315153	0.00602143	0.967521	0.0072203	0.72203	Tnfsf13b(24099),Ccl4(20303),Plau(18792),Blnk(17060),Bcl2l1(12048),Bcl2(12043),Ticam1(106759),	Cxcl2(20310),Ltb(16994),Bcl2a1a(12044),
KEGG_PATHWAY	mmu04120	Ubiquitin mediated proteolysis - Mus musculus (mouse)	10	0.00616903	8	2	139	0.0180052	6.9112e-05	0.000280864	0.0212174	0.000336784	0.0336784	Trim37(68729),Fancl(67030),Pias3(229615),Ube2g2(22213),Cdc34(216150),Siah1a(20437),Nedd4(17999),Cdc20(107995),	Det1(76375),Socs1(12703),
KEGG_PATHWAY	mmu04140	Autophagy - animal - Mus musculus (mouse)	10	0.00616903	6	4	130	0.0168394	0.000258675	0.000779146	0.0794133	0.000934275	0.0934275	Gabarapl2(93739),Rptor(74370),Wipi1(52639),Kras(16653),Bcl2l1(12048),Bcl2(12043),	Deptor(97998),Pik3r4(75669),Rras2(66922),Rras(20130),
KEGG_PATHWAY	mmu04217	Necroptosis - Mus musculus (mouse)	10	0.00616903	7	3	177	0.0229275	3.84413e-07	4.4736e-06	0.000118015	5.3643e-06	0.00053643	Ppid(67738),Aifm1(26926),Smpd1(20597),Pygm(19309),Pla2g4a(18783),Bcl2(12043),Ticam1(106759),	Parp3(235587),Il1a(16175),Cybb(13058),
KEGG_PATHWAY	mmu04310	Wnt signaling pathway - Mus musculus (mouse)	10	0.00616903	10	0	162	0.0209845	3.20244e-06	2.41149e-05	0.000983149	2.89162e-05	0.00289162	Ruvbl1(56505),Prickle3(54630),Csnk1e(27373),Trp53(22059),Siah1a(20437),Myc(17869),Mmp7(17393),Smad3(17127),Lrp5(16973),Ccnd1(12443),	-
KEGG_PATHWAY	mmu04512	ECM-receptor interaction - Mus musculus (mouse)	10	0.00616903	6	4	86	0.0111399	0.0408017	0.0517142	1	0.0620106	6.20106	Spp1(20750),Itgb3(16416),Itga6(16403),Gp1bb(14724),Comp(12845),Npnt(114249),	Thbs1(21825),Sdc1(20969),Itgb7(16421),Fn1(14268),
KEGG_PATHWAY	mmu04550	Signaling pathways regulating pluripotency of stem cells - Mus musculus (mouse)	10	0.00616903	10	0	138	0.0178756	9.80614e-05	0.000380397	0.0301049	0.000456134	0.0456134	Dusp9(75590),Pcgf6(71041),Myc(17869),Smad3(17127),Kras(16653),Igf1(16000),Id1(15901),Lefty1(13590),Bmpr1a(12166),Bmi1(12151),	-
KEGG_PATHWAY	mmu04610	Complement and coagulation cascades - Mus musculus (mouse)	10	0.00616903	7	3	88	0.011399	0.0312775	0.0412774	1	0.0494958	4.94958	Tfpi(21788),Pros1(19128),Plau(18792),Serpine1(18787),Itgb2l(16415),Itgax(16411),Cfh(12628),	C1ra(50909),Procr(19124),Cfb(14962),
KEGG_PATHWAY	mmu04657	IL-17 signaling pathway - Mus musculus (mouse)	10	0.00616903	4	6	91	0.0117876	0.0237864	0.0325664	1	0.0390504	3.90504	S100a9(20202),S100a8(20201),Mmp9(17395),Lcn2(16819),	Ikbke(56489),Cxcl3(330122),Cxcl2(20310),Ccl7(20306),Ccl12(20293),Mmp13(17386),
KEGG_PATHWAY	mmu05142	Chagas disease (American trypanosomiasis) - Mus musculus (mouse)	10	0.00616903	7	3	103	0.013342	0.00781481	0.0133386	1	0.0159943	1.59943	Tgfbr1(21812),Ccl3(20302),Serpine1(18787),Smad3(17127),Il12b(16160),Cd3g(12502),Ticam1(106759),	Ccl12(20293),Nos2(18126),Cd3e(12501),
KEGG_PATHWAY	mmu05150	Staphylococcus aureus infection - Mus musculus (mouse)	10	0.00616903	3	7	96	0.0124352	0.0136228	0.0209527	1	0.0251244	2.51244	Itgb2l(16415),Camp(12796),Cfh(12628),	C1ra(50909),Fcgr4(246256),H2-DMa(14998),H2-Eb1(14969),Cfb(14962),H2-Ab1(14961),Fcgr2b(14130),
KEGG_PATHWAY	mmu05214	Glioma - Mus musculus (mouse)	10	0.00616903	8	2	75	0.00971503	0.112859	0.127853	1	0.153309	15.3309	Trp53(22059),Tgfa(21802),Pdgfb(18591),Kras(16653),Igf1(16000),E2f3(13557),Gadd45a(13197),Ccnd1(12443),	E2f2(242705),E2f1(13555),
KEGG_PATHWAY	mmu05218	Melanoma - Mus musculus (mouse)	10	0.00616903	8	2	72	0.00932642	0.182812	0.196657	1	0.235812	23.5812	Pdgfc(54635),Trp53(22059),Pdgfb(18591),Kras(16653),Igf1(16000),E2f3(13557),Gadd45a(13197),Ccnd1(12443),	E2f2(242705),E2f1(13555),
KEGG_PATHWAY	mmu05224	Breast cancer - Mus musculus (mouse)	10	0.00616903	8	2	147	0.0190415	2.5237e-05	0.000124256	0.00774777	0.000148995	0.0148995	Trp53(22059),Myc(17869),Lrp5(16973),Kras(16653),Igf1(16000),E2f3(13557),Gadd45a(13197),Ccnd1(12443),	E2f2(242705),E2f1(13555),
KEGG_PATHWAY	mmu00010	Glycolysis / Gluconeogenesis - Mus musculus (mouse)	9	0.00555213	5	4	67	0.00867876	0.166215	0.180319	1	0.216221	21.6221	Pck2(74551),Pdhb(68263),Acss2(60525),Pgam2(56012),Ldhb(16832),	Aldh1b1(72535),Pfkp(56421),Minpp1(17330),Aldoc(11676),
KEGG_PATHWAY	mmu00590	Arachidonic acid metabolism - Mus musculus (mouse)	9	0.00555213	8	1	89	0.0115285	0.0147836	0.0222645	1	0.0266974	2.66974	Cyp4f18(72054),Hpgds(54486),Ggt5(23887),Pla2g4a(18783),Ltc4s(17001),Cbr1(12408),Alox5(11689),Cbr3(109857),	Ptges2(96979),
KEGG_PATHWAY	mmu00970	Aminoacyl-tRNA biosynthesis - Mus musculus (mouse)	9	0.00555213	6	3	66	0.00854922	0.164735	0.180241	1	0.216127	21.6127	Mtfmt(69606),Farsa(66590),Dars2(226539),Aars2(224805),Eprs(107508),Yars(107271),	Yars2(70120),Fars2(69955),Lars2(102436),
KEGG_PATHWAY	mmu00982	Drug metabolism - cytochrome P450 - Mus musculus (mouse)	9	0.00555213	5	4	68	0.00880829	0.128772	0.1446	1	0.17339	17.339	Hpgds(54486),Ugt1a5(394433),Mgst2(211666),Gstm5(14866),Gstm4(14865),	Mgst3(66447),Ugt1a6b(394435),Gstp1(14870),Gstm2(14863),
KEGG_PATHWAY	mmu03320	PPAR signaling pathway - Mus musculus (mouse)	9	0.00555213	5	4	87	0.0112694	0.0198079	0.028174	1	0.0337835	3.37835	Pck2(74551),Acsl3(74205),Me1(17436),Lpl(16956),Fabp3(14077),	Fabp5(16592),Acsl1(14081),Fabp7(12140),Fabp4(11770),
KEGG_PATHWAY	mmu04080	Neuroactive ligand-receptor interaction - Mus musculus (mouse)	9	0.00555213	5	4	348	0.0450777	6.02985e-20	7.71896e-18	1.85116e-17	9.25581e-18	9.25581e-16	Tacr2(21337),Penk(18619),Edn1(13614),S1pr1(13609),Adora3(11542),	Ptger2(19217),Cnr2(12802),Adora2b(11541),Npy(109648),
KEGG_PATHWAY	mmu04210	Apoptosis - Mus musculus (mouse)	9	0.00555213	7	2	136	0.0176166	3.3493e-05	0.000158797	0.0102823	0.000190414	0.0190414	Aifm1(26926),Trp53(22059),Kras(16653),Il3ra(16188),Gadd45a(13197),Bcl2l1(12048),Bcl2(12043),	Parp3(235587),Bcl2a1a(12044),
KEGG_PATHWAY	mmu04216	Ferroptosis - Mus musculus (mouse)	9	0.00555213	7	2	41	0.00531088	1	0.833958	1	1	100	Acsl3(74205),Map1lc3a(66734),Slc40a1(53945),Trp53(22059),Hmox1(15368),Gclm(14630),Gclc(14629),	Acsl1(14081),Cybb(13058),
KEGG_PATHWAY	mmu04612	Antigen processing and presentation - Mus musculus (mouse)	9	0.00555213	2	7	91	0.0117876	0.0110363	0.0177709	1	0.0213091	2.13091	Hspa1a(193740),Rfxap(170767),	Psme2b(621823),H2-DMa(14998),H2-M2(14990),H2-Eb1(14969),H2-Ab1(14961),Cd4(12504),Ciita(12265),
KEGG_PATHWAY	mmu04625	C-type lectin receptor signaling pathway - Mus musculus (mouse)	9	0.00555213	4	5	112	0.0145078	0.000937383	0.00220177	0.287777	0.00264015	0.264015	Arhgef12(69632),Kras(16653),Il12b(16160),Plk3(12795),	Rras2(66922),Clec1b(56760),Ikbke(56489),Src(20779),Rras(20130),
KEGG_PATHWAY	mmu04658	Th1 and Th2 cell differentiation - Mus musculus (mouse)	9	0.00555213	3	6	87	0.0112694	0.0198079	0.028174	1	0.0337835	3.37835	Maml3(433586),Il12b(16160),Cd3g(12502),	H2-DMa(14998),H2-Eb1(14969),H2-Ab1(14961),Cd4(12504),Cd3e(12501),Runx3(12399),
KEGG_PATHWAY	mmu04659	Th17 cell differentiation - Mus musculus (mouse)	9	0.00555213	3	6	102	0.0132124	0.0033074	0.00627242	1	0.00752127	0.752127	Tgfbr1(21812),Smad3(17127),Cd3g(12502),	H2-DMa(14998),H2-Eb1(14969),H2-Ab1(14961),Cd4(12504),Cd3e(12501),Ahr(11622),
KEGG_PATHWAY	mmu04662	B cell receptor signaling pathway - Mus musculus (mouse)	9	0.00555213	5	4	83	0.0107513	0.0354608	0.0460855	1	0.0552613	5.52613	Rasgrp3(240168),Blnk(17060),Kras(16653),Cd81(12520),Cd72(12517),	Ifitm1(68713),Pira2(18725),Fcgr2b(14130),Gm15448(100041146),
KEGG_PATHWAY	mmu04668	TNF signaling pathway - Mus musculus (mouse)	9	0.00555213	4	5	113	0.0146373	0.000956509	0.00220622	0.293648	0.00264548	0.264548	Creb3l2(208647),Mmp9(17395),Edn1(13614),Csf1(12977),	Cxcl3(330122),Creb5(231991),Cxcl2(20310),Ccl12(20293),Il18r1(16182),
KEGG_PATHWAY	mmu04670	Leukocyte transendothelial migration - Mus musculus (mouse)	9	0.00555213	7	2	115	0.0148964	0.000684269	0.00166848	0.210071	0.00200067	0.200067	Jam2(67374),Cldn15(60363),Ezr(22350),Mmp9(17395),Itk(16428),Itgb2l(16415),Arhgap5(11855),	Thy1(21838),Cybb(13058),
KEGG_PATHWAY	mmu04915	Estrogen signaling pathway - Mus musculus (mouse)	9	0.00555213	7	2	134	0.0173575	4.70735e-05	0.000198893	0.0144516	0.000238493	0.0238493	Tgfa(21802),Creb3l2(208647),Hspa1a(193740),Mmp9(17395),Kras(16653),Fkbp5(14229),Bcl2(12043),	Creb5(231991),Src(20779),
KEGG_PATHWAY	mmu04921	Oxytocin signaling pathway - Mus musculus (mouse)	9	0.00555213	6	3	154	0.0199482	2.87862e-06	2.23333e-05	0.000883738	2.67799e-05	0.00267799	Rcan1(54720),Pla2g4a(18783),Mef2c(17260),Kras(16653),Kcnj2(16518),Ccnd1(12443),	Src(20779),Cd38(12494),Cacna1d(12289),
KEGG_PATHWAY	mmu04922	Glucagon signaling pathway - Mus musculus (mouse)	9	0.00555213	7	2	105	0.013601	0.00244203	0.0048094	0.749704	0.00576696	0.576696	Pck2(74551),Pdhb(68263),Pgam2(56012),Creb3l2(208647),Pygm(19309),Ldhb(16832),Prmt1(15469),	Pfkp(56421),Creb5(231991),
KEGG_PATHWAY	mmu04934	Cushing syndrome - Mus musculus (mouse)	9	0.00555213	4	5	159	0.0205959	1.40885e-06	1.33592e-05	0.000432516	1.60191e-05	0.00160191	Wdr5b(69544),Creb3l2(208647),E2f3(13557),Ccnd1(12443),	E2f2(242705),Creb5(231991),E2f1(13555),Cacna1d(12289),Ahr(11622),
KEGG_PATHWAY	mmu05010	Alzheimer disease - Mus musculus (mouse)	9	0.00555213	7	2	175	0.0226684	1.66514e-07	2.66449e-06	5.11199e-05	3.19499e-06	0.000319499	Ndufb7(66916),Ndufa7(66416),Ndufa9(66108),Nae1(234664),Lpl(16956),Hsd17b10(15108),Cdk5r1(12569),	Ndufb4(68194),Cacna1d(12289),
KEGG_PATHWAY	mmu05140	Leishmaniasis - Mus musculus (mouse)	9	0.00555213	2	7	67	0.00867876	0.166215	0.180319	1	0.216221	21.6221	Itgb2l(16415),Il12b(16160),	Fcgr4(246256),Nos2(18126),Il1a(16175),H2-DMa(14998),H2-Eb1(14969),H2-Ab1(14961),Cybb(13058),
KEGG_PATHWAY	mmu05144	Malaria - Mus musculus (mouse)	9	0.00555213	5	4	55	0.00712435	0.404844	0.392614	1	0.470785	47.0785	Gypc(71683),Itgb2l(16415),Comp(12845),Cd81(12520),Hbb-bs(100503605),	Thbs1(21825),Sdc1(20969),Ccl12(20293),Il18(16173),
KEGG_PATHWAY	mmu05170	Human immunodeficiency virus 1 infection - Mus musculus (mouse)	9	0.00555213	6	3	239	0.0309585	5.33327e-12	3.41363e-10	1.63731e-09	4.09328e-10	4.09328e-08	Kras(16653),Cfl2(12632),Cd3g(12502),Ccnb2(12442),Bcl2l1(12048),Bcl2(12043),	H2-M2(14990),Cd4(12504),Cd3e(12501),
KEGG_PATHWAY	mmu05210	Colorectal cancer - Mus musculus (mouse)	9	0.00555213	9	0	88	0.011399	0.0201819	0.0283906	1	0.0340432	3.40432	Trp53(22059),Tgfbr1(21812),Tgfa(21802),Myc(17869),Smad3(17127),Kras(16653),Gadd45a(13197),Ccnd1(12443),Bcl2(12043),	-
KEGG_PATHWAY	mmu05235	PD-L1 expression and PD-1 checkpoint pathway in cancer - Mus musculus (mouse)	9	0.00555213	5	4	88	0.011399	0.0201819	0.0283906	1	0.0340432	3.40432	Batf3(381319),Pdcd1(18566),Kras(16653),Cd3g(12502),Ticam1(106759),	Cd274(60533),Batf(53314),Cd4(12504),Cd3e(12501),
KEGG_PATHWAY	mmu05321	Inflammatory bowel disease (IBD) - Mus musculus (mouse)	9	0.00555213	3	6	59	0.00764249	0.329594	0.327071	1	0.392191	39.2191	Tlr5(53791),Smad3(17127),Il12b(16160),	Il18r1(16182),Il1a(16175),Il18(16173),H2-DMa(14998),H2-Eb1(14969),H2-Ab1(14961),
KEGG_PATHWAY	mmu00280	Valine, leucine and isoleucine degradation - Mus musculus (mouse)	8	0.00493523	4	4	56	0.00725389	0.241791	0.251644	1	0.301747	30.1747	Pccb(66904),Hibch(227095),Hsd17b10(15108),Bcat2(12036),	Mcee(73724),Aldh1b1(72535),Il4i1(14204),Dbt(13171),
KEGG_PATHWAY	mmu03018	RNA degradation - Mus musculus (mouse)	8	0.00493523	5	3	83	0.0107513	0.0163448	0.0243295	1	0.0291735	2.91735	Exosc6(72544),Cnot8(69125),Mphosph6(68533),Exosc5(27998),Btg2(12227),	Lsm5(66373),Pfkp(56421),Exosc4(109075),
KEGG_PATHWAY	mmu03022	Basal transcription factors - Mus musculus (mouse)	8	0.00493523	7	1	44	0.00569948	0.58181	0.543642	1	0.651882	65.1882	Taf4b(72504),Gtf2f2(68705),Gtf2ird1(57080),Taf5(226182),Tbp(21374),Gtf2h3(209357),Gtf2i(14886),	Gtf2h4(14885),
KEGG_PATHWAY	mmu03030	DNA replication - Mus musculus (mouse)	8	0.00493523	8	0	35	0.00453368	1	0.833958	1	1	100	Rnaseh2a(69724),Rfc3(69263),Rnaseh2b(67153),Pole4(66979),Prim1(19075),Pold1(18971),Pcna(18538),Mcm5(17218),	-
KEGG_PATHWAY	mmu04152	AMPK signaling pathway - Mus musculus (mouse)	8	0.00493523	6	2	126	0.0163212	4.3708e-05	0.000196322	0.0134184	0.00023541	0.023541	Pck2(74551),Rptor(74370),Creb3l2(208647),Igf1(16000),Fasn(14104),Ccnd1(12443),	Pfkp(56421),Creb5(231991),
KEGG_PATHWAY	mmu04261	Adrenergic signaling in cardiomyocytes - Mus musculus (mouse)	8	0.00493523	6	2	152	0.0196891	1.24155e-06	1.22257e-05	0.000381155	1.46598e-05	0.00146598	Ppp1r1a(58200),Creb3l2(208647),Scn1b(20266),Bcl2(12043),Fxyd2(11936),Atp1b1(11931),	Creb5(231991),Cacna1d(12289),
KEGG_PATHWAY	mmu04350	TGF-beta signaling pathway - Mus musculus (mouse)	8	0.00493523	7	1	95	0.0123057	0.00345256	0.00640537	1	0.00768069	0.768069	Tgfbr1(21812),Myc(17869),Smad3(17127),Id1(15901),Fst(14313),Lefty1(13590),Bmpr1a(12166),	Thbs1(21825),
KEGG_PATHWAY	mmu04620	Toll-like receptor signaling pathway - Mus musculus (mouse)	8	0.00493523	6	2	99	0.0128238	0.00179443	0.00367536	0.550891	0.00440713	0.440713	Tlr5(53791),Spp1(20750),Ccl4(20303),Ccl3(20302),Il12b(16160),Ticam1(106759),	Ikbke(56489),Cxcl9(17329),
KEGG_PATHWAY	mmu04740	Olfactory transduction - Mus musculus (mouse)	8	0.00493523	8	0	1134	0.146891	1.7191e-88	4.40131e-86	5.27762e-86	5.27762e-86	5.27762e-84	Olfr111(545205),Olfr1013(258757),Olfr1427(258674),Olfr110(258325),Olfr1373(211472),Pde2a(207728),Pde1b(18574),Olfr17(18314),	-
KEGG_PATHWAY	mmu04928	Parathyroid hormone synthesis, secretion and action - Mus musculus (mouse)	8	0.00493523	4	4	107	0.0138601	0.000674116	0.00165952	0.206954	0.00198994	0.198994	Creb3l2(208647),Mef2c(17260),Lrp5(16973),Bcl2(12043),	Slc9a3r1(26941),Creb5(231991),Pde4b(18578),Mmp13(17386),
KEGG_PATHWAY	mmu04931	Insulin resistance - Mus musculus (mouse)	8	0.00493523	6	2	110	0.0142487	0.000488365	0.00123796	0.149928	0.00148443	0.148443	Pck2(74551),Ppp1r3b(244416),Ppp1r3d(228966),Creb3l2(208647),Rps6ka2(20112),Pygm(19309),	Creb5(231991),Ppp1r3e(105651),
KEGG_PATHWAY	mmu04972	Pancreatic secretion - Mus musculus (mouse)	8	0.00493523	6	2	105	0.013601	0.000947592	0.00220552	0.290911	0.00264464	0.264464	Rab11a(53869),Slc4a2(20535),Slc12a2(20496),Fxyd2(11936),Atp1b1(11931),Ctrl(109660),	Cd38(12494),Bst1(12182),
KEGG_PATHWAY	mmu05012	Parkinson disease - Mus musculus (mouse)	8	0.00493523	6	2	144	0.0186528	3.62819e-06	2.58029e-05	0.00111385	3.09404e-05	0.00309404	Ndufb7(66916),Ndufa7(66416),Ndufa9(66108),Uchl1(22223),Ube2g2(22213),Sept5(18951),	Ndufb4(68194),Ppif(105675),
KEGG_PATHWAY	mmu05223	Non-small cell lung cancer - Mus musculus (mouse)	8	0.00493523	6	2	66	0.00854922	0.0874263	0.103627	1	0.124259	12.4259	Trp53(22059),Tgfa(21802),Kras(16653),E2f3(13557),Gadd45a(13197),Ccnd1(12443),	E2f2(242705),E2f1(13555),
KEGG_PATHWAY	mmu05230	Central carbon metabolism in cancer - Mus musculus (mouse)	8	0.00493523	7	1	67	0.00867876	0.0882049	0.104068	1	0.124788	12.4788	Pdhb(68263),Sirt3(64384),Pgam2(56012),Trp53(22059),Myc(17869),Ldhb(16832),Kras(16653),	Pfkp(56421),
KEGG_PATHWAY	mmu05322	Systemic lupus erythematosus - Mus musculus (mouse)	8	0.00493523	2	6	143	0.0185233	3.61729e-06	2.58029e-05	0.00111051	3.09404e-05	0.00309404	Hist1h2bq(665596),Hist1h4m(100041230),	Hist1h2br(665622),C1ra(50909),Fcgr4(246256),H2-DMa(14998),H2-Eb1(14969),H2-Ab1(14961),
KEGG_PATHWAY	mmu05416	Viral myocarditis - Mus musculus (mouse)	8	0.00493523	3	5	89	0.0115285	0.00638241	0.0111922	1	0.0134205	1.34205	Sgcb(24051),Itgb2l(16415),Ccnd1(12443),	H2-DMa(14998),H2-M2(14990),H2-Eb1(14969),H2-Ab1(14961),Cav1(12389),
KEGG_PATHWAY	mmu00330	Arginine and proline metabolism - Mus musculus (mouse)	7	0.00431832	4	3	50	0.00647668	0.218319	0.228627	1	0.274147	27.4147	Gatm(67092),Srm(20810),Ckb(12709),Amd1(11702),	Aldh1b1(72535),Nos2(18126),Arg1(11846),
KEGG_PATHWAY	mmu00520	Amino sugar and nucleotide sugar metabolism - Mus musculus (mouse)	7	0.00431832	7	0	49	0.00634715	0.282103	0.286609	1	0.343674	34.3674	Nans(94181),Gale(74246),Gne(50798),Gmds(218138),Renbp(19703),Hexb(15212),Galk1(14635),	-
KEGG_PATHWAY	mmu00561	Glycerolipid metabolism - Mus musculus (mouse)	7	0.00431832	4	3	61	0.00790155	0.0744621	0.0889295	1	0.106635	10.6635	Dgat2(67800),Mgll(23945),Dgkd(227333),Lpl(16956),	Aldh1b1(72535),Agpat4(68262),Agpat2(67512),
KEGG_PATHWAY	mmu00620	Pyruvate metabolism - Mus musculus (mouse)	7	0.00431832	6	1	38	0.00492228	0.689426	0.63493	1	0.761345	76.1345	Pck2(74551),Pdhb(68263),Acss2(60525),Mdh1(17449),Me1(17436),Ldhb(16832),	Aldh1b1(72535),
KEGG_PATHWAY	mmu00640	Propanoate metabolism - Mus musculus (mouse)	7	0.00431832	5	2	33	0.00427461	1	0.833958	1	1	100	Pccb(66904),Acss2(60525),Hibch(227095),Suclg2(20917),Ldhb(16832),	Mcee(73724),Dbt(13171),
KEGG_PATHWAY	mmu03040	Spliceosome - Mus musculus (mouse)	7	0.00431832	6	1	133	0.017228	4.42249e-06	2.97965e-05	0.0013577	3.5729e-05	0.0035729	Snrpa1(68981),Rbm22(66810),Snrnp40(66585),Prpf40b(54614),Plrg1(53317),Hspa1a(193740),	Lsm5(66373),
KEGG_PATHWAY	mmu03460	Fanconi anemia pathway - Mus musculus (mouse)	7	0.00431832	7	0	51	0.00660622	0.218782	0.228627	1	0.274147	27.4147	Polh(80905),Slx1b(75764),Fance(72775),Mus81(71711),Fancl(67030),Fan1(330554),Ercc1(13870),	-
KEGG_PATHWAY	mmu04114	Oocyte meiosis - Mus musculus (mouse)	7	0.00431832	6	1	119	0.0154145	3.94925e-05	0.000180555	0.0121242	0.000216503	0.0216503	Fbxo5(67141),Aurka(20878),Rps6ka2(20112),Igf1(16000),Ccnb2(12442),Cdc20(107995),	Mad2l1(56150),
KEGG_PATHWAY	mmu04130	SNARE interactions in vesicular transport - Mus musculus (mouse)	7	0.00431832	4	3	33	0.00427461	1	0.833958	1	1	100	Stx5a(56389),Vamp1(22317),Stx2(13852),Bet1(12068),	Bet1l(54399),Bnip1(224630),Stx3(20908),
KEGG_PATHWAY	mmu04520	Adherens junction - Mus musculus (mouse)	7	0.00431832	6	1	72	0.00932642	0.0231901	0.0322677	1	0.0386922	3.86922	Ssx2ip(99167),Tjp1(21872),Tgfbr1(21812),Ptprm(19274),Smad3(17127),Fer(14158),	Src(20779),
KEGG_PATHWAY	mmu04611	Platelet activation - Mus musculus (mouse)	7	0.00431832	6	1	125	0.0161917	1.99929e-05	0.000104463	0.00613782	0.000125262	0.0125262	P2ry12(70839),Arhgef12(69632),Rasgrp2(19395),Pla2g4a(18783),Itgb3(16416),Gp1bb(14724),	Src(20779),
KEGG_PATHWAY	mmu04623	Cytosolic DNA-sensing pathway - Mus musculus (mouse)	7	0.00431832	4	3	64	0.00829016	0.0561257	0.0690845	1	0.0828394	8.28394	Polr2h(245841),Mavs(228607),Ccl4(20303),Polr1c(20016),	Polr3k(67005),Ikbke(56489),Il18(16173),
KEGG_PATHWAY	mmu04660	T cell receptor signaling pathway - Mus musculus (mouse)	7	0.00431832	4	3	103	0.013342	0.000481936	0.00123388	0.147954	0.00147954	0.147954	Pdcd1(18566),Kras(16653),Itk(16428),Cd3g(12502),	Nck2(17974),Cd4(12504),Cd3e(12501),
KEGG_PATHWAY	mmu04721	Synaptic vesicle cycle - Mus musculus (mouse)	7	0.00431832	5	2	77	0.00997409	0.0125156	0.0199026	1	0.0238652	2.38652	Atp6v1g1(66290),Stx2(13852),Cacna1a(12286),Atp6v0a1(11975),Napa(108124),	Atp6v0d2(242341),Stx3(20908),
KEGG_PATHWAY	mmu04725	Cholinergic synapse - Mus musculus (mouse)	7	0.00431832	5	2	113	0.0146373	8.04185e-05	0.000316756	0.0246885	0.000379823	0.0379823	Creb3l2(208647),Kras(16653),Kcnj2(16518),Cacna1a(12286),Bcl2(12043),	Creb5(231991),Cacna1d(12289),
KEGG_PATHWAY	mmu04925	Aldosterone synthesis and secretion - Mus musculus (mouse)	7	0.00431832	5	2	102	0.0132124	0.000465106	0.00122244	0.142788	0.00146583	0.146583	Dagla(269060),Daglb(231871),Creb3l2(208647),Pde2a(207728),Atp1b1(11931),	Creb5(231991),Cacna1d(12289),
KEGG_PATHWAY	mmu04970	Salivary secretion - Mus musculus (mouse)	7	0.00431832	5	2	78	0.0101036	0.0128366	0.0202758	1	0.0243128	2.43128	Slc4a2(20535),Slc12a2(20496),Camp(12796),Fxyd2(11936),Atp1b1(11931),	Cd38(12494),Bst1(12182),
KEGG_PATHWAY	mmu04978	Mineral absorption - Mus musculus (mouse)	7	0.00431832	7	0	47	0.00608808	0.360756	0.353879	1	0.424337	42.4337	Slc39a4(72027),Slc40a1(53945),Slc46a1(52466),Mt2(17750),Hmox1(15368),Fxyd2(11936),Atp1b1(11931),	-
KEGG_PATHWAY	mmu05133	Pertussis - Mus musculus (mouse)	7	0.00431832	4	3	76	0.00984456	0.0124217	0.0198766	1	0.0238341	2.38341	Itgb2l(16415),Il12b(16160),Cfl2(12632),Ticam1(106759),	C1ra(50909),Nos2(18126),Il1a(16175),
KEGG_PATHWAY	mmu05134	Legionellosis - Mus musculus (mouse)	7	0.00431832	4	3	58	0.00751295	0.0984179	0.115057	1	0.137965	13.7965	Tlr5(53791),Hspa1a(193740),Itgb2l(16415),Il12b(16160),	Cxcl3(330122),Cxcl2(20310),Il18(16173),
KEGG_PATHWAY	mmu05135	Yersinia infection - Mus musculus (mouse)	7	0.00431832	3	4	123	0.0159326	1.91137e-05	0.00010195	0.00586791	0.000122248	0.0122248	Arhgef12(69632),Rps6ka2(20112),Ticam1(106759),	Src(20779),Ccl12(20293),Il18(16173),Fn1(14268),
KEGG_PATHWAY	mmu05146	Amoebiasis - Mus musculus (mouse)	7	0.00431832	3	4	103	0.013342	0.000481936	0.00123388	0.147954	0.00147954	0.147954	Serpinb6a(20719),Itgb2l(16415),Il12b(16160),	Nos2(18126),Fn1(14268),Cd1d1(12479),Arg1(11846),
KEGG_PATHWAY	mmu05410	Hypertrophic cardiomyopathy (HCM) - Mus musculus (mouse)	7	0.00431832	5	2	91	0.0117876	0.00178556	0.00367536	0.548167	0.00440713	0.440713	Sgcb(24051),Itgb3(16416),Itga6(16403),Igf1(16000),Edn1(13614),	Itgb7(16421),Cacna1d(12289),
KEGG_PATHWAY	mmu00071	Fatty acid degradation - Mus musculus (mouse)	6	0.00370142	4	2	50	0.00647668	0.15003	0.165567	1	0.198532	19.8532	Acsl3(74205),Gcdh(270076),Eci2(23986),Acadvl(11370),	Aldh1b1(72535),Acsl1(14081),
KEGG_PATHWAY	mmu00240	Pyrimidine metabolism - Mus musculus (mouse)	6	0.00370142	4	2	58	0.00751295	0.045456	0.0567701	1	0.0680731	6.80731	Dctpp1(66422),Ctps2(55936),Enpp1(18605),Nme7(171567),	Nt5c(50773),Entpd1(12495),
KEGG_PATHWAY	mmu00510	N-Glycan biosynthesis - Mus musculus (mouse)	6	0.00370142	4	2	50	0.00647668	0.15003	0.165567	1	0.198532	19.8532	Alg2(56737),Alg10b(380959),St6gal1(20440),Alg9(102580),	Dolk(227697),Alg3(208624),
KEGG_PATHWAY	mmu00512	Mucin type O-glycan biosynthesis - Mus musculus (mouse)	6	0.00370142	5	1	28	0.00362694	1	0.833958	1	1	100	C1galt1c1(59048),Galnt12(230145),St3gal2(20444),Gcnt1(14537),Galnt3(14425),	Galnt6(207839),
KEGG_PATHWAY	mmu00562	Inositol phosphate metabolism - Mus musculus (mouse)	6	0.00370142	3	3	73	0.00945596	0.00670382	0.0115191	1	0.0138126	1.38126	Isyna1(71780),Inpp4b(234515),Pip4k2c(117150),	Minpp1(17330),Inpp5j(170835),Impa2(114663),
KEGG_PATHWAY	mmu00564	Glycerophospholipid metabolism - Mus musculus (mouse)	6	0.00370142	3	3	97	0.0125648	0.00030531	0.000898472	0.0937302	0.00107736	0.107736	Mboat7(77582),Dgkd(227333),Pla2g4a(18783),	Agpat4(68262),Agpat2(67512),Adprm(66358),
KEGG_PATHWAY	mmu00601	Glycosphingolipid biosynthesis - lacto and neolacto series - Mus musculus (mouse)	6	0.00370142	4	2	27	0.00349741	1	0.833958	1	1	100	B4galt4(56375),St3gal6(54613),B3galnt1(26879),Fut4(14345),	B3gnt3(72297),Ggta1(14594),
KEGG_PATHWAY	mmu00630	Glyoxylate and dicarboxylate metabolism - Mus musculus (mouse)	6	0.00370142	4	2	31	0.00401554	0.824827	0.74097	1	0.888498	88.8498	Gcsh(68133),Pccb(66904),Acss2(60525),Mdh1(17449),	Mcee(73724),Pgp(67078),
KEGG_PATHWAY	mmu00760	Nicotinate and nicotinamide metabolism - Mus musculus (mouse)	6	0.00370142	3	3	36	0.00466321	0.534297	0.504773	1	0.605274	60.5274	Nadk2(68646),Nmnat1(66454),Enpp1(18605),	Nt5c(50773),Cd38(12494),Bst1(12182),
KEGG_PATHWAY	mmu00860	Porphyrin and chlorophyll metabolism - Mus musculus (mouse)	6	0.00370142	3	3	41	0.00531088	0.32846	0.327071	1	0.392191	39.2191	Ugt1a5(394433),Hmox1(15368),Eprs(107508),	Ugt1a6b(394435),Ppox(19044),Hmbs(15288),
KEGG_PATHWAY	mmu03410	Base excision repair - Mus musculus (mouse)	6	0.00370142	5	1	35	0.00453368	0.532475	0.504773	1	0.605274	60.5274	Pole4(66979),Ung(22256),Pold1(18971),Pcna(18538),Lig3(16882),	Parp3(235587),
KEGG_PATHWAY	mmu04070	Phosphatidylinositol signaling system - Mus musculus (mouse)	6	0.00370142	4	2	98	0.0126943	0.000209295	0.000674474	0.0642536	0.000808763	0.0808763	Ip6k2(76500),Inpp4b(234515),Dgkd(227333),Pip4k2c(117150),	Inpp5j(170835),Impa2(114663),
KEGG_PATHWAY	mmu04071	Sphingolipid signaling pathway - Mus musculus (mouse)	6	0.00370142	6	0	124	0.0160622	5.42431e-06	3.56092e-05	0.00166526	4.2699e-05	0.0042699	Trp53(22059),Smpd1(20597),Kras(16653),S1pr1(13609),Bcl2(12043),Adora3(11542),	-
KEGG_PATHWAY	mmu04211	Longevity regulating pathway - Mus musculus (mouse)	6	0.00370142	5	1	90	0.011658	0.000893159	0.00211733	0.2742	0.00253889	0.253889	Rptor(74370),Trp53(22059),Creb3l2(208647),Kras(16653),Igf1(16000),	Creb5(231991),
KEGG_PATHWAY	mmu04270	Vascular smooth muscle contraction - Mus musculus (mouse)	6	0.00370142	4	2	140	0.0181347	3.65591e-07	4.45716e-06	0.000112236	5.34459e-06	0.000534459	Arhgef12(69632),Pla2g4a(18783),Edn1(13614),Cald1(109624),	Cacna1d(12289),Adora2b(11541),
KEGG_PATHWAY	mmu04672	Intestinal immune network for IgA production - Mus musculus (mouse)	6	0.00370142	1	5	43	0.00556995	0.252913	0.262154	1	0.314349	31.4349	Tnfsf13b(24099),	Tnfsf13(69583),Itgb7(16421),H2-DMa(14998),H2-Eb1(14969),H2-Ab1(14961),
KEGG_PATHWAY	mmu04722	Neurotrophin signaling pathway - Mus musculus (mouse)	6	0.00370142	6	0	121	0.0156736	7.72921e-06	4.94718e-05	0.00237287	5.93217e-05	0.00593217	Maged1(94275),Zfp110(65020),Trp53(22059),Rps6ka2(20112),Kras(16653),Bcl2(12043),	-
KEGG_PATHWAY	mmu04914	Progesterone-mediated oocyte maturation - Mus musculus (mouse)	6	0.00370142	5	1	90	0.011658	0.000893159	0.00211733	0.2742	0.00253889	0.253889	Aurka(20878),Rps6ka2(20112),Kras(16653),Igf1(16000),Ccnb2(12442),	Mad2l1(56150),
KEGG_PATHWAY	mmu04918	Thyroid hormone synthesis - Mus musculus (mouse)	6	0.00370142	5	1	73	0.00945596	0.00670382	0.0115191	1	0.0138126	1.38126	Ttr(22139),Ttf1(22130),Creb3l2(208647),Fxyd2(11936),Atp1b1(11931),	Creb5(231991),
KEGG_PATHWAY	mmu04940	Type I diabetes mellitus - Mus musculus (mouse)	6	0.00370142	1	5	70	0.00906736	0.0131879	0.020555	1	0.0246475	2.46475	Il12b(16160),	Il1a(16175),H2-DMa(14998),H2-M2(14990),H2-Eb1(14969),H2-Ab1(14961),
KEGG_PATHWAY	mmu05211	Renal cell carcinoma - Mus musculus (mouse)	6	0.00370142	5	1	68	0.00880829	0.0129087	0.0202758	1	0.0243128	2.43128	Prcc(94315),Ets1(23871),Tgfa(21802),Pdgfb(18591),Kras(16653),	Vegfa(22339),
KEGG_PATHWAY	mmu05231	Choline metabolism in cancer - Mus musculus (mouse)	6	0.00370142	6	0	99	0.0128238	0.000210752	0.000674474	0.064701	0.000808763	0.0808763	Pdgfc(54635),Dgkd(227333),Slc22a5(20520),Pla2g4a(18783),Pdgfb(18591),Kras(16653),	-
KEGG_PATHWAY	mmu05340	Primary immunodeficiency - Mus musculus (mouse)	6	0.00370142	3	3	36	0.00466321	0.534297	0.504773	1	0.605274	60.5274	Ung(22256),Rfxap(170767),Blnk(17060),	Cd4(12504),Cd3e(12501),Ciita(12265),
KEGG_PATHWAY	mmu05414	Dilated cardiomyopathy (DCM) - Mus musculus (mouse)	6	0.00370142	4	2	95	0.0123057	0.000443714	0.00118335	0.13622	0.00141896	0.141896	Sgcb(24051),Itgb3(16416),Itga6(16403),Igf1(16000),	Itgb7(16421),Cacna1d(12289),
KEGG_PATHWAY	mmu00040	Pentose and glucuronate interconversions - Mus musculus (mouse)	5	0.00308452	2	3	34	0.00440415	0.388556	0.378251	1	0.453562	45.3562	Ugt1a5(394433),Sord(20322),	Dcxr(67880),Ugt1a6b(394435),Xylb(102448),
KEGG_PATHWAY	mmu00052	Galactose metabolism - Mus musculus (mouse)	5	0.00308452	4	1	32	0.00414508	0.50584	0.485048	1	0.581621	58.1621	Ganc(76051),Gale(74246),Galk1(14635),Glb1(12091),	Pfkp(56421),
KEGG_PATHWAY	mmu00130	Ubiquinone and other terpenoid-quinone biosynthesis - Mus musculus (mouse)	5	0.00308452	3	2	11	0.00142487	0.312122	0.31461	1	0.37725	37.725	Ggcx(56316),Coq3(230027),Nqo1(18104),	Coq5(52064),Coq6(217707),
KEGG_PATHWAY	mmu00310	Lysine degradation - Mus musculus (mouse)	5	0.00308452	3	2	59	0.00764249	0.0183399	0.0265282	1	0.03181	3.181	Setmar(74729),Gcdh(270076),Dot1l(208266),	Aldh1b1(72535),Setdb2(239122),
KEGG_PATHWAY	mmu00531	Glycosaminoglycan degradation - Mus musculus (mouse)	5	0.00308452	3	2	21	0.00272021	1	0.833958	1	1	100	Hexb(15212),Glb1(12091),Arsb(11881),	Hyal2(15587),Hpse(15442),
KEGG_PATHWAY	mmu00532	Glycosaminoglycan biosynthesis - chondroitin sulfate / dermatan sulfate - Mus musculus (mouse)	5	0.00308452	4	1	20	0.00259067	1	0.833958	1	1	100	Chst15(77590),Chst12(59031),Chst11(58250),B3galt6(117592),	Chst14(72136),
KEGG_PATHWAY	mmu00604	Glycosphingolipid biosynthesis - ganglio series - Mus musculus (mouse)	5	0.00308452	4	1	15	0.00194301	0.557993	0.525221	1	0.629794	62.9794	St3gal5(20454),St3gal2(20444),Hexb(15212),Glb1(12091),	St6galnac6(50935),
KEGG_PATHWAY	mmu04012	ErbB signaling pathway - Mus musculus (mouse)	5	0.00308452	3	2	84	0.0108808	0.00055299	0.00138803	0.169768	0.00166439	0.166439	Tgfa(21802),Myc(17869),Kras(16653),	Src(20779),Nck2(17974),
KEGG_PATHWAY	mmu04213	Longevity regulating pathway - multiple species - Mus musculus (mouse)	5	0.00308452	5	0	62	0.00803109	0.013247	0.020555	1	0.0246475	2.46475	Rptor(74370),Hspa1a(193740),Kras(16653),Igf1(16000),Cryab(12955),	-
KEGG_PATHWAY	mmu04370	VEGF signaling pathway - Mus musculus (mouse)	5	0.00308452	2	3	58	0.00751295	0.0182631	0.0265282	1	0.03181	3.181	Pla2g4a(18783),Kras(16653),	Vegfa(22339),Src(20779),Kdr(16542),
KEGG_PATHWAY	mmu04540	Gap junction - Mus musculus (mouse)	5	0.00308452	4	1	86	0.0111399	0.000379833	0.00102365	0.116609	0.00122746	0.122746	Pdgfc(54635),Tjp1(21872),Pdgfb(18591),Kras(16653),	Src(20779),
KEGG_PATHWAY	mmu04650	Natural killer cell mediated cytotoxicity - Mus musculus (mouse)	5	0.00308452	4	1	118	0.015285	2.81123e-06	2.23333e-05	0.000863046	2.67799e-05	0.00267799	Ulbp1(77777),Sh2d1b1(26904),Kras(16653),Itgb2l(16415),	Fcgr4(246256),
KEGG_PATHWAY	mmu04666	Fc gamma R-mediated phagocytosis - Mus musculus (mouse)	5	0.00308452	3	2	92	0.0119171	0.000188749	0.000626829	0.0579459	0.000751632	0.0751632	Bin1(30948),Pla2g4a(18783),Cfl2(12632),	Fcgr4(246256),Fcgr2b(14130),
KEGG_PATHWAY	mmu04726	Serotonergic synapse - Mus musculus (mouse)	5	0.00308452	4	1	132	0.0170984	2.64897e-07	3.47809e-06	8.13234e-05	4.17059e-06	0.000417059	Pla2g4a(18783),Kras(16653),Cacna1a(12286),Alox5(11689),	Cacna1d(12289),
KEGG_PATHWAY	mmu04911	Insulin secretion - Mus musculus (mouse)	5	0.00308452	3	2	86	0.0111399	0.000379833	0.00102365	0.116609	0.00122746	0.122746	Creb3l2(208647),Fxyd2(11936),Atp1b1(11931),	Creb5(231991),Cacna1d(12289),
KEGG_PATHWAY	mmu04917	Prolactin signaling pathway - Mus musculus (mouse)	5	0.00308452	3	2	72	0.00932642	0.00334496	0.00629701	1	0.00755075	0.755075	Socs4(67296),Kras(16653),Ccnd1(12443),	Src(20779),Socs1(12703),
KEGG_PATHWAY	mmu04924	Renin secretion - Mus musculus (mouse)	5	0.00308452	3	2	76	0.00984456	0.00161456	0.00344473	0.49567	0.00413058	0.413058	Pde1b(18574),Kcnj2(16518),Edn1(13614),	Ptger2(19217),Cacna1d(12289),
KEGG_PATHWAY	mmu04932	Non-alcoholic fatty liver disease (NAFLD) - Mus musculus (mouse)	5	0.00308452	3	2	151	0.0195596	1.0879e-08	3.48162e-07	3.33985e-06	4.17482e-07	4.17482e-05	Ndufb7(66916),Ndufa7(66416),Ndufa9(66108),	Ndufb4(68194),Il1a(16175),
KEGG_PATHWAY	mmu04971	Gastric acid secretion - Mus musculus (mouse)	5	0.00308452	5	0	74	0.00958549	0.00232085	0.00460618	0.712502	0.00552327	0.552327	Ezr(22350),Slc4a2(20535),Kcnj2(16518),Kcnj10(16513),Atp1b1(11931),	-
KEGG_PATHWAY	mmu04977	Vitamin digestion and absorption - Mus musculus (mouse)	5	0.00308452	4	1	24	0.00310881	0.806719	0.727254	1	0.872052	87.2052	Slc46a1(52466),Slc5a6(330064),Slc19a1(20509),Slc19a2(116914),	Btd(26363),
KEGG_PATHWAY	mmu05032	Morphine addiction - Mus musculus (mouse)	5	0.00308452	3	2	92	0.0119171	0.000188749	0.000626829	0.0579459	0.000751632	0.0751632	Pde2a(207728),Pde1b(18574),Cacna1a(12286),	Pde7b(29863),Pde4b(18578),
KEGG_PATHWAY	mmu05213	Endometrial cancer - Mus musculus (mouse)	5	0.00308452	5	0	58	0.00751295	0.0182631	0.0265282	1	0.03181	3.181	Trp53(22059),Myc(17869),Kras(16653),Gadd45a(13197),Ccnd1(12443),	-
KEGG_PATHWAY	mmu05216	Thyroid cancer - Mus musculus (mouse)	5	0.00308452	5	0	37	0.00479275	0.298356	0.301923	1	0.362037	36.2037	Trp53(22059),Myc(17869),Kras(16653),Gadd45a(13197),Ccnd1(12443),	-
KEGG_PATHWAY	mmu05221	Acute myeloid leukemia - Mus musculus (mouse)	5	0.00308452	4	1	69	0.00893782	0.00468275	0.00850284	1	0.0101958	1.01958	Myc(17869),Kras(16653),Ccnd1(12443),Cebpe(110794),	Bcl2a1a(12044),
KEGG_PATHWAY	mmu05330	Allograft rejection - Mus musculus (mouse)	5	0.00308452	1	4	64	0.00829016	0.00933323	0.0152522	1	0.0182889	1.82889	Il12b(16160),	H2-DMa(14998),H2-M2(14990),H2-Eb1(14969),H2-Ab1(14961),
KEGG_PATHWAY	mmu05332	Graft-versus-host disease - Mus musculus (mouse)	5	0.00308452	0	5	65	0.00841969	0.009597	0.0155511	1	0.0186473	1.86473	-	Il1a(16175),H2-DMa(14998),H2-M2(14990),H2-Eb1(14969),H2-Ab1(14961),
KEGG_PATHWAY	mmu05412	Arrhythmogenic right ventricular cardiomyopathy (ARVC) - Mus musculus (mouse)	5	0.00308452	3	2	77	0.00997409	0.00165169	0.00349482	0.507068	0.00419065	0.419065	Sgcb(24051),Itgb3(16416),Itga6(16403),	Itgb7(16421),Cacna1d(12289),
KEGG_PATHWAY	mmu00020	Citrate cycle (TCA cycle) - Mus musculus (mouse)	4	0.00246761	4	0	32	0.00414508	0.259876	0.265078	1	0.317856	31.7856	Pck2(74551),Pdhb(68263),Suclg2(20917),Mdh1(17449),	-
KEGG_PATHWAY	mmu00051	Fructose and mannose metabolism - Mus musculus (mouse)	4	0.00246761	2	2	35	0.00453368	0.137311	0.153516	1	0.184081	18.4081	Gmds(218138),Sord(20322),	Pfkp(56421),Aldoc(11676),
KEGG_PATHWAY	mmu00061	Fatty acid biosynthesis - Mus musculus (mouse)	4	0.00246761	3	1	19	0.00246114	1	0.833958	1	1	100	Acsl3(74205),Cbr4(234309),Fasn(14104),	Acsl1(14081),
KEGG_PATHWAY	mmu00100	Steroid biosynthesis - Mus musculus (mouse)	4	0.00246761	3	1	19	0.00246114	1	0.833958	1	1	100	Soat2(223920),Lss(16987),Fdft1(14137),	Ebp(13595),
KEGG_PATHWAY	mmu00260	Glycine, serine and threonine metabolism - Mus musculus (mouse)	4	0.00246761	4	0	40	0.00518135	0.102441	0.118676	1	0.142304	14.2304	Gcsh(68133),Gatm(67092),Pgam2(56012),Psat1(107272),	-
KEGG_PATHWAY	mmu00670	One carbon pool by folate - Mus musculus (mouse)	4	0.00246761	3	1	19	0.00246114	1	0.833958	1	1	100	Mtfmt(69606),Mthfd2(17768),Mthfd1(108156),	Mthfs(107885),
KEGG_PATHWAY	mmu00770	Pantothenate and CoA biosynthesis - Mus musculus (mouse)	4	0.00246761	4	0	18	0.00233161	1	0.833958	1	1	100	Coasy(71743),Ppcdc(66812),Enpp1(18605),Bcat2(12036),	-
KEGG_PATHWAY	mmu00830	Retinol metabolism - Mus musculus (mouse)	4	0.00246761	3	1	91	0.0117876	4.73878e-05	0.000198893	0.014548	0.000238493	0.0238493	Rdh12(77974),Retsat(67442),Ugt1a5(394433),	Ugt1a6b(394435),
KEGG_PATHWAY	mmu00900	Terpenoid backbone biosynthesis - Mus musculus (mouse)	4	0.00246761	3	1	23	0.00297927	0.605656	0.561823	1	0.673683	67.3683	Pdss2(71365),Dhdds(67422),Mvk(17855),	Mvd(192156),
KEGG_PATHWAY	mmu03020	RNA polymerase - Mus musculus (mouse)	4	0.00246761	3	1	30	0.00388601	0.255861	0.264141	1	0.316732	31.6732	Polr2h(245841),Polr1a(20019),Polr1c(20016),	Polr3k(67005),
KEGG_PATHWAY	mmu04136	Autophagy - other - Mus musculus (mouse)	4	0.00246761	3	1	32	0.00414508	0.259876	0.265078	1	0.317856	31.7856	Gabarapl2(93739),Rptor(74370),Wipi1(52639),	Pik3r4(75669),
KEGG_PATHWAY	mmu04260	Cardiac muscle contraction - Mus musculus (mouse)	4	0.00246761	3	1	86	0.0111399	0.000102003	0.000384048	0.0313148	0.000460512	0.0460512	Asph(65973),Fxyd2(11936),Atp1b1(11931),	Cacna1d(12289),
KEGG_PATHWAY	mmu04340	Hedgehog signaling pathway - Mus musculus (mouse)	4	0.00246761	4	0	44	0.00569948	0.0514252	0.0636045	1	0.0762682	7.62682	Smo(319757),Csnk1e(27373),Ccnd1(12443),Bcl2(12043),	-
KEGG_PATHWAY	mmu04622	RIG-I-like receptor signaling pathway - Mus musculus (mouse)	4	0.00246761	3	1	68	0.00880829	0.00142483	0.00309146	0.437424	0.00370698	0.370698	Mavs(228607),Il12b(16160),Ddx3x(13205),	Ikbke(56489),
KEGG_PATHWAY	mmu04727	GABAergic synapse - Mus musculus (mouse)	4	0.00246761	2	2	90	0.011658	4.58532e-05	0.000198893	0.0140769	0.000238493	0.0238493	Gabarapl2(93739),Cacna1a(12286),	Src(20779),Cacna1d(12289),
KEGG_PATHWAY	mmu04728	Dopaminergic synapse - Mus musculus (mouse)	4	0.00246761	2	2	135	0.017487	2.26291e-08	6.43735e-07	6.94713e-06	7.71903e-07	7.71903e-05	Creb3l2(208647),Cacna1a(12286),	Creb5(231991),Cacna1d(12289),
KEGG_PATHWAY	mmu04730	Long-term depression - Mus musculus (mouse)	4	0.00246761	4	0	61	0.00790155	0.00432696	0.00791293	1	0.0094884	0.94884	Pla2g4a(18783),Kras(16653),Igf1(16000),Cacna1a(12286),	-
KEGG_PATHWAY	mmu04750	Inflammatory mediator regulation of TRP channels - Mus musculus (mouse)	4	0.00246761	2	2	127	0.0164508	1.21644e-07	2.39568e-06	3.73447e-05	2.87267e-06	0.000287267	Pla2g4a(18783),Igf1(16000),	Src(20779),Ptger2(19217),
KEGG_PATHWAY	mmu04912	GnRH signaling pathway - Mus musculus (mouse)	4	0.00246761	2	2	90	0.011658	4.58532e-05	0.000198893	0.0140769	0.000238493	0.0238493	Pla2g4a(18783),Kras(16653),	Src(20779),Cacna1d(12289),
KEGG_PATHWAY	mmu04916	Melanogenesis - Mus musculus (mouse)	4	0.00246761	4	0	100	0.0129534	9.62515e-06	5.50732e-05	0.00295492	6.60384e-05	0.00660384	Creb3l2(208647),Kitl(17311),Kras(16653),Edn1(13614),	-
KEGG_PATHWAY	mmu04920	Adipocytokine signaling pathway - Mus musculus (mouse)	4	0.00246761	2	2	71	0.00919689	0.000987731	0.00225789	0.303233	0.00270744	0.270744	Pck2(74551),Acsl3(74205),	Acsl1(14081),Npy(109648),
KEGG_PATHWAY	mmu04930	Type II diabetes mellitus - Mus musculus (mouse)	4	0.00246761	2	2	48	0.00621762	0.0256989	0.0345699	1	0.0414528	4.14528	Socs4(67296),Cacna1a(12286),	Socs1(12703),Cacna1d(12289),
KEGG_PATHWAY	mmu04960	Aldosterone-regulated sodium reabsorption - Mus musculus (mouse)	4	0.00246761	4	0	38	0.00492228	0.0992071	0.115452	1	0.138439	13.8439	Kras(16653),Igf1(16000),Fxyd2(11936),Atp1b1(11931),	-
KEGG_PATHWAY	mmu04962	Vasopressin-regulated water reabsorption - Mus musculus (mouse)	4	0.00246761	3	1	43	0.00556995	0.0510251	0.063416	1	0.0760422	7.60422	Dynll2(68097),Rab11a(53869),Creb3l2(208647),	Creb5(231991),
KEGG_PATHWAY	mmu04964	Proximal tubule bicarbonate reclamation - Mus musculus (mouse)	4	0.00246761	4	0	22	0.00284974	0.605121	0.561823	1	0.673683	67.3683	Pck2(74551),Mdh1(17449),Fxyd2(11936),Atp1b1(11931),	-
KEGG_PATHWAY	mmu04976	Bile secretion - Mus musculus (mouse)	4	0.00246761	4	0	72	0.00932642	0.0010279	0.00232893	0.315566	0.00279262	0.279262	Slc4a2(20535),Ephx1(13849),Fxyd2(11936),Atp1b1(11931),	-
KEGG_PATHWAY	mmu04979	Cholesterol metabolism - Mus musculus (mouse)	4	0.00246761	3	1	49	0.00634715	0.0259182	0.0345699	1	0.0414528	4.14528	Soat2(223920),Lpl(16956),Apoc1(11812),	Apoc2(11813),
KEGG_PATHWAY	mmu05014	Amyotrophic lateral sclerosis (ALS) - Mus musculus (mouse)	4	0.00246761	4	0	52	0.00673575	0.018536	0.0266611	1	0.0319694	3.19694	Trp53(22059),Ccs(12460),Bcl2l1(12048),Bcl2(12043),	-
KEGG_PATHWAY	mmu05320	Autoimmune thyroid disease - Mus musculus (mouse)	4	0.00246761	0	4	79	0.0102332	0.000326207	0.000927969	0.100146	0.00111273	0.111273	-	H2-DMa(14998),H2-M2(14990),H2-Eb1(14969),H2-Ab1(14961),
KEGG_PATHWAY	mmu00030	Pentose phosphate pathway - Mus musculus (mouse)	3	0.00185071	1	2	32	0.00414508	0.107885	0.122761	1	0.147203	14.7203	Prps2(110639),	Pfkp(56421),Aldoc(11676),
KEGG_PATHWAY	mmu00053	Ascorbate and aldarate metabolism - Mus musculus (mouse)	3	0.00185071	1	2	27	0.00349741	0.214839	0.226355	1	0.271422	27.1422	Ugt1a5(394433),	Aldh1b1(72535),Ugt1a6b(394435),
KEGG_PATHWAY	mmu00140	Steroid hormone biosynthesis - Mus musculus (mouse)	3	0.00185071	2	1	89	0.0115285	9.44312e-06	5.50732e-05	0.00289904	6.60384e-05	0.00660384	Ugt1a5(394433),Hsd11b1(15483),	Ugt1a6b(394435),
KEGG_PATHWAY	mmu00220	Arginine biosynthesis - Mus musculus (mouse)	3	0.00185071	1	2	19	0.00246114	0.56206	0.527111	1	0.63206	63.206	Asl(109900),	Nos2(18126),Arg1(11846),
KEGG_PATHWAY	mmu00250	Alanine, aspartate and glutamate metabolism - Mus musculus (mouse)	3	0.00185071	2	1	38	0.00492228	0.0357069	0.046171	1	0.0553638	5.53638	Nit2(52633),Asl(109900),	Il4i1(14204),
KEGG_PATHWAY	mmu00380	Tryptophan metabolism - Mus musculus (mouse)	3	0.00185071	1	2	48	0.00621762	0.00799372	0.0133764	1	0.0160397	1.60397	Gcdh(270076),	Aldh1b1(72535),Il4i1(14204),
KEGG_PATHWAY	mmu00410	beta-Alanine metabolism - Mus musculus (mouse)	3	0.00185071	2	1	34	0.00440415	0.0746796	0.0889295	1	0.106635	10.6635	Hibch(227095),Srm(20810),	Aldh1b1(72535),
KEGG_PATHWAY	mmu00500	Starch and sucrose metabolism - Mus musculus (mouse)	3	0.00185071	3	0	33	0.00427461	0.0737741	0.0886761	1	0.106332	10.6332	Ganc(76051),Pygm(19309),Enpp1(18605),	-
KEGG_PATHWAY	mmu00603	Glycosphingolipid biosynthesis - globo and isoglobo series - Mus musculus (mouse)	3	0.00185071	3	0	16	0.00207254	0.755288	0.685719	1	0.822247	82.2247	B3galnt1(26879),St3gal2(20444),Hexb(15212),	-
KEGG_PATHWAY	mmu01523	Antifolate resistance - Mus musculus (mouse)	3	0.00185071	3	0	30	0.00388601	0.105493	0.121662	1	0.145885	14.5885	Slc46a1(52466),Slc19a1(20509),Folr2(14276),	-
KEGG_PATHWAY	mmu02010	ABC transporters - Mus musculus (mouse)	3	0.00185071	2	1	48	0.00621762	0.00799372	0.0133764	1	0.0160397	1.60397	Abcd2(26874),Abca13(268379),	Abcb8(74610),
KEGG_PATHWAY	mmu03060	Protein export - Mus musculus (mouse)	3	0.00185071	3	0	28	0.00362694	0.149306	0.165567	1	0.198532	19.8532	Spcs1(69019),Srp54a(24067),Srprb(20818),	-
KEGG_PATHWAY	mmu03430	Mismatch repair - Mus musculus (mouse)	3	0.00185071	3	0	22	0.00284974	0.414197	0.400169	1	0.479843	47.9843	Rfc3(69263),Pold1(18971),Pcna(18538),	-
KEGG_PATHWAY	mmu03440	Homologous recombination - Mus musculus (mouse)	3	0.00185071	3	0	41	0.00531088	0.0247993	0.0335938	1	0.0402824	4.02824	Mus81(71711),Nbn(27354),Pold1(18971),	-
KEGG_PATHWAY	mmu03450	Non-homologous end-joining - Mus musculus (mouse)	3	0.00185071	3	0	13	0.00168394	1	0.833958	1	1	100	Xrcc5(22596),Xrcc6(14375),Xrcc4(108138),	-
KEGG_PATHWAY	mmu04330	Notch signaling pathway - Mus musculus (mouse)	3	0.00185071	2	1	49	0.00634715	0.00818229	0.0136031	1	0.0163114	1.63114	Maml3(433586),Mfng(17305),	Dtx3(80904),
KEGG_PATHWAY	mmu04664	Fc epsilon RI signaling pathway - Mus musculus (mouse)	3	0.00185071	3	0	68	0.00880829	0.000359295	0.000989125	0.110304	0.00118606	0.118606	Pla2g4a(18783),Kras(16653),Alox5(11689),	-
KEGG_PATHWAY	mmu04720	Long-term potentiation - Mus musculus (mouse)	3	0.00185071	3	0	67	0.00867876	0.00035397	0.000989125	0.108669	0.00118606	0.118606	Ppp1r1a(58200),Rps6ka2(20112),Kras(16653),	-
KEGG_PATHWAY	mmu04724	Glutamatergic synapse - Mus musculus (mouse)	3	0.00185071	2	1	114	0.0147668	1.64164e-07	2.66449e-06	5.03984e-05	3.19499e-06	0.000319499	Pla2g4a(18783),Cacna1a(12286),	Cacna1d(12289),
KEGG_PATHWAY	mmu04913	Ovarian steroidogenesis - Mus musculus (mouse)	3	0.00185071	3	0	57	0.00738342	0.00171674	0.0035734	0.527039	0.00428487	0.428487	Pla2g4a(18783),Igf1(16000),Alox5(11689),	-
KEGG_PATHWAY	mmu04923	Regulation of lipolysis in adipocytes - Mus musculus (mouse)	3	0.00185071	1	2	56	0.00725389	0.00256003	0.0050033	0.785929	0.00599946	0.599946	Mgll(23945),	Fabp4(11770),Npy(109648),
KEGG_PATHWAY	mmu04927	Cortisol synthesis and secretion - Mus musculus (mouse)	3	0.00185071	1	2	69	0.00893782	0.000239112	0.000746569	0.0734074	0.000895212	0.0895212	Creb3l2(208647),	Creb5(231991),Cacna1d(12289),
KEGG_PATHWAY	mmu04961	Endocrine and other factor-regulated calcium reabsorption - Mus musculus (mouse)	3	0.00185071	3	0	57	0.00738342	0.00171674	0.0035734	0.527039	0.00428487	0.428487	Rab11a(53869),Fxyd2(11936),Atp1b1(11931),	-
KEGG_PATHWAY	mmu04966	Collecting duct acid secretion - Mus musculus (mouse)	3	0.00185071	2	1	27	0.00349741	0.214839	0.226355	1	0.271422	27.1422	Atp6v1g1(66290),Atp6v0a1(11975),	Atp6v0d2(242341),
KEGG_PATHWAY	mmu04973	Carbohydrate digestion and absorption - Mus musculus (mouse)	3	0.00185071	2	1	43	0.00556995	0.017004	0.0251645	1	0.0301748	3.01748	Fxyd2(11936),Atp1b1(11931),	Cacna1d(12289),
KEGG_PATHWAY	mmu04974	Protein digestion and absorption - Mus musculus (mouse)	3	0.00185071	3	0	90	0.011658	9.84574e-06	5.50732e-05	0.00302264	6.60384e-05	0.00660384	Fxyd2(11936),Atp1b1(11931),Ctrl(109660),	-
KEGG_PATHWAY	mmu05030	Cocaine addiction - Mus musculus (mouse)	3	0.00185071	2	1	48	0.00621762	0.00799372	0.0133764	1	0.0160397	1.60397	Creb3l2(208647),Cdk5r1(12569),	Creb5(231991),
KEGG_PATHWAY	mmu05031	Amphetamine addiction - Mus musculus (mouse)	3	0.00185071	1	2	68	0.00880829	0.000359295	0.000989125	0.110304	0.00118606	0.118606	Creb3l2(208647),	Creb5(231991),Cacna1d(12289),
KEGG_PATHWAY	mmu05100	Bacterial invasion of epithelial cells - Mus musculus (mouse)	3	0.00185071	0	3	74	0.00958549	0.000107058	0.000388312	0.0328669	0.000465626	0.0465626	-	Src(20779),Fn1(14268),Cav1(12389),
KEGG_PATHWAY	mmu05143	African trypanosomiasis - Mus musculus (mouse)	3	0.00185071	2	1	39	0.00505181	0.036233	0.0466159	1	0.0558972	5.58972	Il12b(16160),Hbb-bs(100503605),	Il18(16173),
KEGG_PATHWAY	mmu05217	Basal cell carcinoma - Mus musculus (mouse)	3	0.00185071	3	0	63	0.00816062	0.000787256	0.00190148	0.241687	0.00228007	0.228007	Smo(319757),Trp53(22059),Gadd45a(13197),	-
KEGG_PATHWAY	mmu05310	Asthma - Mus musculus (mouse)	3	0.00185071	0	3	25	0.00323834	0.210583	0.223712	1	0.268254	26.8254	-	H2-DMa(14998),H2-Eb1(14969),H2-Ab1(14961),
KEGG_PATHWAY	mmu00340	Histidine metabolism - Mus musculus (mouse)	2	0.00123381	1	1	24	0.00310881	0.107799	0.122761	1	0.147203	14.7203	Hnmt(140483),	Aldh1b1(72535),
KEGG_PATHWAY	mmu00350	Tyrosine metabolism - Mus musculus (mouse)	2	0.00123381	1	1	40	0.00518135	0.00635975	0.0111922	1	0.0134205	1.34205	Fahd1(68636),	Il4i1(14204),
KEGG_PATHWAY	mmu00430	Taurine and hypotaurine metabolism - Mus musculus (mouse)	2	0.00123381	2	0	11	0.00142487	0.704298	0.643993	1	0.772213	77.2213	Csad(246277),Ggt5(23887),	-
KEGG_PATHWAY	mmu00534	Glycosaminoglycan biosynthesis - heparan sulfate / heparin - Mus musculus (mouse)	2	0.00123381	2	0	24	0.00310881	0.107799	0.122761	1	0.147203	14.7203	Extl3(54616),B3galt6(117592),	-
KEGG_PATHWAY	mmu00565	Ether lipid metabolism - Mus musculus (mouse)	2	0.00123381	2	0	47	0.00608808	0.0018517	0.00376255	0.568472	0.00451168	0.451168	Pla2g4a(18783),Pafah2(100163),	-
KEGG_PATHWAY	mmu00600	Sphingolipid metabolism - Mus musculus (mouse)	2	0.00123381	2	0	48	0.00621762	0.00189448	0.00381918	0.581607	0.00457958	0.457958	Smpd1(20597),Glb1(12091),	-
KEGG_PATHWAY	mmu00730	Thiamine metabolism - Mus musculus (mouse)	2	0.00123381	2	0	15	0.00194301	0.335705	0.331849	1	0.397921	39.7921	Ak1(11636),Thtpa(105663),	-
KEGG_PATHWAY	mmu00740	Riboflavin metabolism - Mus musculus (mouse)	2	0.00123381	1	1	8	0.00103627	1	0.833958	1	1	100	Enpp1(18605),	Acp5(11433),
KEGG_PATHWAY	mmu00750	Vitamin B6 metabolism - Mus musculus (mouse)	2	0.00123381	2	0	9	0.0011658	1	0.833958	1	1	100	Phospho2(73373),Psat1(107272),	-
KEGG_PATHWAY	mmu00790	Folate biosynthesis - Mus musculus (mouse)	2	0.00123381	1	1	26	0.00336788	0.0718685	0.0867931	1	0.104074	10.4074	Cbr1(12408),	Pts(19286),
KEGG_PATHWAY	mmu00920	Sulfur metabolism - Mus musculus (mouse)	2	0.00123381	0	2	11	0.00142487	0.704298	0.643993	1	0.772213	77.2213	-	Papss2(23972),Bpnt1(23827),
KEGG_PATHWAY	mmu03015	mRNA surveillance pathway - Mus musculus (mouse)	2	0.00123381	1	1	96	0.0124352	2.64375e-07	3.47809e-06	8.11632e-05	4.17059e-06	0.000417059	Cpsf4(54188),	Pelo(105083),
KEGG_PATHWAY	mmu03050	Proteasome - Mus musculus (mouse)	2	0.00123381	1	1	46	0.00595855	0.00291894	0.00566154	0.896116	0.00678876	0.678876	Psmb7(19177),	Psme2b(621823),
KEGG_PATHWAY	mmu04392	Hippo signaling pathway - multiple species - Mus musculus (mouse)	2	0.00123381	2	0	26	0.00336788	0.0718685	0.0867931	1	0.104074	10.4074	Wwtr1(97064),Csnk1e(27373),	-
KEGG_PATHWAY	mmu04710	Circadian rhythm - Mus musculus (mouse)	2	0.00123381	2	0	30	0.00388601	0.0321592	0.0422234	1	0.0506301	5.06301	Csnk1e(27373),Nr1d1(217166),	-
KEGG_PATHWAY	mmu04742	Taste transduction - Mus musculus (mouse)	2	0.00123381	2	0	88	0.011399	1.48507e-06	1.35792e-05	0.000455918	1.62828e-05	0.00162828	Pde1b(18574),Cacna1a(12286),	-
KEGG_PATHWAY	mmu04975	Fat digestion and absorption - Mus musculus (mouse)	2	0.00123381	1	1	40	0.00518135	0.00635975	0.0111922	1	0.0134205	1.34205	Dgat2(67800),	Agpat2(67512),
KEGG_PATHWAY	mmu05020	Prion diseases - Mus musculus (mouse)	2	0.00123381	1	1	34	0.00440415	0.0222985	0.0311965	1	0.0374078	3.74078	Hspa1a(193740),	Il1a(16175),
KEGG_PATHWAY	mmu00120	Primary bile acid biosynthesis - Mus musculus (mouse)	1	0.000616903	1	0	16	0.00207254	0.0921635	0.108239	1	0.12979	12.979	Ch25h(12642),	-
KEGG_PATHWAY	mmu00290	Valine, leucine and isoleucine biosynthesis - Mus musculus (mouse)	1	0.000616903	1	0	4	0.000518135	1	0.833958	1	1	100	Bcat2(12036),	-
KEGG_PATHWAY	mmu00360	Phenylalanine metabolism - Mus musculus (mouse)	1	0.000616903	0	1	23	0.00297927	0.0235156	0.0323687	1	0.0388134	3.88134	-	Il4i1(14204),
KEGG_PATHWAY	mmu00400	Phenylalanine, tyrosine and tryptophan biosynthesis - Mus musculus (mouse)	1	0.000616903	0	1	8	0.00103627	0.365452	0.357118	1	0.428221	42.8221	-	Il4i1(14204),
KEGG_PATHWAY	mmu00450	Selenocompound metabolism - Mus musculus (mouse)	1	0.000616903	0	1	17	0.00220207	0.0571658	0.0700281	1	0.0839708	8.39708	-	Papss2(23972),
KEGG_PATHWAY	mmu00515	Mannose type O-glycan biosynthesis - Mus musculus (mouse)	1	0.000616903	1	0	23	0.00297927	0.0235156	0.0323687	1	0.0388134	3.88134	Fut4(14345),	-
KEGG_PATHWAY	mmu00563	Glycosylphosphatidylinositol (GPI)-anchor biosynthesis - Mus musculus (mouse)	1	0.000616903	1	0	25	0.00323834	0.0147745	0.0222645	1	0.0266974	2.66974	Pigyl(66268),	-
KEGG_PATHWAY	mmu00591	Linoleic acid metabolism - Mus musculus (mouse)	1	0.000616903	1	0	50	0.00647668	0.000107685	0.000388312	0.0330594	0.000465626	0.0465626	Pla2g4a(18783),	-
KEGG_PATHWAY	mmu00592	alpha-Linolenic acid metabolism - Mus musculus (mouse)	1	0.000616903	1	0	25	0.00323834	0.0147745	0.0222645	1	0.0266974	2.66974	Pla2g4a(18783),	-
KEGG_PATHWAY	mmu00780	Biotin metabolism - Mus musculus (mouse)	1	0.000616903	0	1	3	0.000388601	1	0.833958	1	1	100	-	Btd(26363),
KEGG_PATHWAY	mmu04614	Renin-angiotensin system - Mus musculus (mouse)	1	0.000616903	0	1	36	0.00466321	0.00155931	0.00335481	0.478708	0.00402275	0.402275	-	Anpep(16790),
KEGG_PATHWAY	mmu04713	Circadian entrainment - Mus musculus (mouse)	1	0.000616903	0	1	99	0.0128238	9.61608e-09	3.48162e-07	2.95214e-06	4.17482e-07	4.17482e-05	-	Cacna1d(12289),
KEGG_PATHWAY	mmu04744	Phototransduction - Mus musculus (mouse)	1	0.000616903	1	0	27	0.00349741	0.00935297	0.0152522	1	0.0182889	1.82889	Guca1a(14913),	-
KEGG_PATHWAY	mmu04950	Maturity onset diabetes of the young - Mus musculus (mouse)	1	0.000616903	0	1	27	0.00349741	0.00935297	0.0152522	1	0.0182889	1.82889	-	Hhex(15242),
KEGG_PATHWAY	mmu05033	Nicotine addiction - Mus musculus (mouse)	1	0.000616903	1	0	40	0.00518135	0.00107512	0.00241453	0.330061	0.00289527	0.289527	Cacna1a(12286),	-

## Sheet: TOP 10
Category	PathwayID	Pathway description	Number of DEGs with pathway annotation (1621)	Number of DEGs with pathway annotation % (1621)	Up regulated	Down regulated	Number of All genes with pathway annotation (7720)	Number of All genes with pathway annotation % (7720)	P-value	-log2 (p-value)	Q-value	Bonferroni	Benjamini	FDR(%)	Gene(Up)	Gene(Down)
KEGG_PATHWAY	mmu05200	Pathways in cancer - Mus musculus (mouse)	43	0.0265268	33	10	535	0.0693005	7.21835e-13	40.3334	6.16026e-11	2.21603e-10	7.38677e-11	7.38677e-09	Arhgef12(69632),Smo(319757),Rasgrp3(240168),Ets1(23871),Zbtb17(22642),Trp53(22059),Tgfbr1(21812),Tgfa(21802),Mgst2(211666),Rasgrp2(19395),Pdgfb(18591),Nqo1(18104),Myc(17869),Mmp9(17395),Kitl(17311),Smad3(17127),Lrp5(16973),Kras(16653),Itga6(16403),Il3ra(16188),Il12b(16160),Igf2(16002),Igf1(16000),Hmox1(15368),Gstm5(14866),Gstm4(14865),Edn1(13614),E2f3(13557),Gadd45a(13197),Csf3r(12986),Ccnd1(1244…	Mgst3(66447),Cks2(66197),E2f2(242705),Vegfa(22339),Ptger2(19217),Nos2(18126),Gstp1(14870),Gstm2(14863),Fn1(14268),E2f1(13555),
KEGG_PATHWAY	mmu05165	Human papillomavirus infection - Mus musculus (mouse)	27	0.0166564	16	11	361	0.0467617	6.5268e-10	30.5129	3.34205e-08	2.00373e-07	4.00746e-08	4.00746e-06	Atp6v1g1(66290),Pard6a(56513),Maml3(433586),Trp53(22059),Tbp(21374),Creb3l2(208647),Spp1(20750),Mfng(17305),Kras(16653),Itgb3(16416),Itga6(16403),Comp(12845),Ccnd1(12443),Atp6v0a1(11975),Ticam1(106759),Tubg1(103733),	Ikbke(56489),Hes6(55927),Slc9a3r1(26941),Atp6v0d2(242341),Creb5(231991),Vegfa(22339),Thbs1(21825),Itgb7(16421),H2-M2(14990),Fn1(14268),E2f1(13555),
KEGG_PATHWAY	mmu04151	PI3K-Akt signaling pathway - Mus musculus (mouse)	28	0.0172733	22	6	358	0.0463731	2.30019e-09	28.6956	9.81509e-08	7.06157e-07	1.17693e-07	1.17693e-05	Pck2(74551),Rptor(74370),Pdgfc(54635),Trp53(22059),Tgfa(21802),Creb3l2(208647),Spp1(20750),Pdgfb(18591),Myc(17869),Kitl(17311),Kras(16653),Itgb3(16416),Itga6(16403),Il3ra(16188),Igf2(16002),Igf1(16000),Csf3r(12986),Csf1(12977),Comp(12845),Ccnd1(12443),Bcl2l1(12048),Bcl2(12043),	Creb5(231991),Vegfa(22339),Thbs1(21825),Kdr(16542),Itgb7(16421),Fn1(14268),
KEGG_PATHWAY	mmu05168	Herpes simplex virus 1 infection - Mus musculus (mouse)	47	0.0289944	34	13	439	0.0568653	7.16011e-07	20.4135	7.6382e-06	0.000219815	9.15898e-06	0.000915898	Zfp623(78834),Zfp946(74149),Zfp777(72306),2610008E11Rik(72128),Zfp707(69020),Gm14391(665001),Zfp963(620419),Zfp235(56525),Zfp69(381549),Zfp780b(338354),Zfp128(243833),Zfp938(237411),Zfp709(236193),Zfp868(234362),Zfp958(233987),Zfp768(233890),Zfp790(233056),Zfp954(232853),Mavs(228607),Zfp90(22751),Zfp40(22700),Zfp27(22689),Zfp7(223669),Trp53(22059),Eif2b2(217715),Eif2b1(209354),Zfp87(170763),Itgb3…	Ikbke(56489),Zfp809(235047),Zfp961(234413),Pilra(231805),Zfp97(22759),Zfp677(210503),Src(20779),Ccl12(20293),Cfp(18636),H2-DMa(14998),H2-M2(14990),H2-Eb1(14969),H2-Ab1(14961),
KEGG_PATHWAY	mmu04060	Cytokine-cytokine receptor interaction - Mus musculus (mouse)	33	0.0203578	16	17	296	0.038342	0.000105444	13.2112	0.000388312	0.0323712	0.000465626	0.0465626	Tnfrsf12a(27279),Tnfsf13b(24099),Gdf15(23886),Tgfbr1(21812),Il1f9(215257),Il20rb(213208),Ccl4(20303),Ccl3(20302),Il3ra(16188),Il12b(16160),Il11ra1(16157),Cx3cr1(13051),Csf3r(12986),Csf1(12977),Cxcr2(12765),Bmpr1a(12166),	Tnfsf13(69583),Ppbp(57349),Pf4(56744),Cxcl3(330122),Tnfsf12(21944),Tnfrsf9(21942),Cxcl2(20310),Ccl7(20306),Ccl12(20293),Ccl1(20290),Cxcl9(17329),Ltb(16994),Il18r1(16182),Il1a(16175),Il18(16173),Ccr1(12768),Cd4(12504),
KEGG_PATHWAY	mmu04010	MAPK signaling pathway - Mus musculus (mouse)	34	0.0209747	24	10	294	0.0380829	0.000251237	11.9587	0.000769369	0.0771296	0.000922552	0.0922552	Dusp9(75590),Pdgfc(54635),Flnb(286940),Map4k2(26412),Map4k1(26411),Rasgrp3(240168),Trp53(22059),Tgfbr1(21812),Tgfa(21802),Rps6ka2(20112),Rasgrp2(19395),Hspa1a(193740),Pla2g4a(18783),Pdgfb(18591),Myc(17869),Kitl(17311),Mef2c(17260),Stmn1(16765),Kras(16653),Igf2(16002),Igf1(16000),Gadd45a(13197),Csf1(12977),Cacna1a(12286),	Dusp16(70686),Rras2(66922),Ptpn7(320139),Dusp5(240672),Vegfa(22339),Rras(20130),Mknk1(17346),Kdr(16542),Il1a(16175),Cacna1d(12289),
KEGG_PATHWAY	mmu04015	Rap1 signaling pathway - Mus musculus (mouse)	22	0.0135719	16	6	214	0.0277202	0.000315236	11.6313	0.00091714	0.0967775	0.00109974	0.109974	Pard6a(56513),Pdgfc(54635),Sipa1l2(244668),Rasgrp3(240168),Rapgef5(217944),Rasgrp2(19395),Pfn2(18645),Pdgfb(18591),Kitl(17311),Kras(16653),Itgb3(16416),Itgb2l(16415),Igf1(16000),Id1(15901),Csf1(12977),Arap3(106952),	Vegfa(22339),Thbs1(21825),Src(20779),Rras(20130),Kdr(16542),Adora2b(11541),
KEGG_PATHWAY	mmu05166	Human T-cell leukemia virus 1 infection - Mus musculus (mouse)	27	0.0166564	17	10	246	0.0318653	0.000324715	11.5885	0.000927969	0.0996874	0.00111273	0.111273	Ets1(23871),Trp53(22059),Tgfbr1(21812),Tbp(21374),Creb3l2(208647),Myc(17869),Mmp7(17393),Smad3(17127),Kras(16653),Itgb2l(16415),E2f3(13557),Cd3g(12502),Ccnd1(12443),Ccnb2(12442),Bub3(12237),Bcl2l1(12048),Cdc20(107995),	Mad2l1(56150),E2f2(242705),Creb5(231991),H2-DMa(14998),H2-M2(14990),H2-Eb1(14969),H2-Ab1(14961),E2f1(13555),Cd4(12504),Cd3e(12501),
KEGG_PATHWAY	mmu05205	Proteoglycans in cancer - Mus musculus (mouse)	26	0.0160395	14	12	206	0.0266839	0.00631767	7.30639	0.0111922	1	0.0134205	1.34205	Arhgef12(69632),Smo(319757),Flnb(286940),Ezr(22350),Trp53(22059),Plau(18792),Myc(17869),Mmp9(17395),Kras(16653),Itgb3(16416),Il12b(16160),Igf2(16002),Igf1(16000),Ccnd1(12443),	Rras2(66922),Vegfa(22339),Thbs1(21825),Sdc1(20969),Src(20779),Rras(20130),Pdcd4(18569),Kdr(16542),Hpse(15442),Gpc1(14733),Fn1(14268),Cav1(12389),
KEGG_PATHWAY	mmu05418	Fluid shear stress and atherosclerosis - Mus musculus (mouse)	25	0.0154226	14	11	143	0.0185233	0.353359	1.5008	0.347956	1	0.417235	41.7235	Trp53(22059),Mgst2(211666),Pdgfb(18591),Nqo1(18104),Mmp9(17395),Mef2c(17260),Klf2(16598),Itgb3(16416),Hmox1(15368),Gstm5(14866),Gstm4(14865),Edn1(13614),Bmpr1a(12166),Bcl2(12043),	Mgst3(66447),Vegfa(22339),Sdc1(20969),Src(20779),Ccl12(20293),Kdr(16542),Il1a(16175),Gstp1(14870),Gstm2(14863),Gpc1(14733),Cav1(12389),

## Sheet: -log2 (p-value)
Pathway description	-log2 (p-value)
Human papillomavirus infection	30.5129
PI3K-Akt signaling pathway	28.6956
Herpes simplex virus 1 infection	20.4135
Cytokine-cytokine receptor interaction	13.2112
MAPK signaling pathway	11.9587
Human T-cell leukemia virus 1 infection	11.5885
