# Supplementary material for: Microglial Nox2 Plays a Key Role in the Pathogenesis of Experimental Autoimmune Encephalomyelitis
Source: Front Immunol. 2021 Apr 2;12:638381. doi: 10.3389/fimmu.2021.638381 (PMC8050344; doi:10.3389/fimmu.2021.638381)
Supplement: Supplementary file 5 [file Table_4.xlsx]

## Sheet: Sheet0
© 2000-2020 QIAGEN. All rights reserved.
Ingenuity Canonical Pathways	-log(p-value)	Ratio	z-score	Molecules
STAT3 Pathway	4.44	0.17	0.471	BCL2,BMPR1A,CXCR2,IGF1,IL11RA,IL18R1,IL1A,IL20RB,IL3RA,KDR,KRAS,MAP3K9,MYC,PDGFB,PIAS3,RRAS,RRAS2,SOCS1,SOCS4,SRC,TGFA,TGFBR1,VEGFA
Chronic Myeloid Leukemia Signaling	4.25	0.184	#NUM!	BCL2L1,CCND1,E2F1,E2F2,E2F3,E2F8,HDAC10,HDAC6,HDAC9,IKBKE,KRAS,MYC,PA2G4,PIK3R4,RRAS,RRAS2,SMAD3,TGFBR1,TP53
Glioma Invasiveness Signaling	3.96	0.203	0.258	ITGB3,KRAS,MMP9,PIK3R4,PLAU,RHOB,RHOC,RHOF,RHOJ,RHOT2,RHOV,RND3,RRAS,RRAS2,TIMP2
Glioblastoma Multiforme Signaling	3.5	0.145	0.894	CCND1,E2F1,E2F2,E2F3,E2F8,IGF1,IGF2,KRAS,MYC,PDGFB,PDGFC,PIK3R4,RHOB,RHOC,RHOF,RHOJ,RHOT2,RHOV,RND3,RRAS,RRAS2,SMO,SRC,TP53
Pancreatic Adenocarcinoma Signaling	3.43	0.165	2.111	BCL2,BCL2L1,CCND1,E2F1,E2F2,E2F3,E2F8,HMOX1,KRAS,MMP9,PA2G4,PDGFC,PIK3R4,SMAD3,TGFA,TGFBR1,TP53,VEGFA
Granulocyte Adhesion and Diapedesis	3.34	0.14	#NUM!	CCL1,CCL2,CCL3L3,CCL4,Ccl7,CLDN15,CSF3R,CXCL3,Cxcl3,Cxcl9,CXCR2,EZR,IL18,IL1A,IL36G,ITGA6,ITGB3,MMP13,MMP7,MMP9,PF4,Ppbp,SDC1,SELL,THY1
NER Pathway	3.27	0.165	1.291	CETN2,COPS5,ERCC1,ERCC5,GTF2H3,GTF2H4,H4C4,HMGN1,LIG3,PCNA,POLD1,POLE4,POLR2H,PRIM1,RFC3,SLC19A1,XPA
Glutathione-mediated Detoxification	2.98	0.25	0	ANPEP,GSTM1,GSTM3,GSTM4,GSTP1,HPGDS,MGST2,MGST3
ILK Signaling	2.96	0.132	0	CCND1,CFL2,CREB5,FLNB,FN1,ITGB3,ITGB7,LIMS1,MMP9,MYC,NCK2,NOS2,PARVA,PDGFC,PIK3R4,PPM1L,PPP1R14B,RHOB,RHOC,RHOF,RHOJ,RHOT2,RHOV,RND3,VEGFA
Leukotriene Biosynthesis	2.94	0.385	1.342	ALOX5,GGT5,LTC4S,MGST2,MGST3
Role of CHK Proteins in Cell Cycle Checkpoint Control	2.87	0.193	1.134	ATMIN,E2F1,E2F2,E2F3,E2F8,NBN,PCNA,PPM1L,RFC3,SLC19A1,TP53
Sirtuin Signaling Pathway	2.87	0.117	2.646	ACSS2,DOT1L,E2F1,GABARAPL2,GADD45A,LDHB,MAP1LC3A,MYC,NBN,NDUFA7,NDUFA9,NDUFAF2,NDUFB4,NDUFB7,NOS2,NQO1,PAM16,PCK2,PGAM2,POLR1A,POLR1C,PPID,PPIF,RPTOR,RRP9,SIRT3,SIRT4,TIMM50,TOMM7,TP53,TRIM28,XPA,XRCC5,XRCC6
Cell Cycle: G1/S Checkpoint Regulation	2.78	0.179	-0.905	CCND1,E2F1,E2F2,E2F3,E2F8,HDAC10,HDAC6,HDAC9,MYC,PA2G4,SMAD3,TP53
DNA Double-Strand Break Repair by Non-Homologous End Joining	2.77	0.357	#NUM!	LIG3,NBN,XRCC4,XRCC5,XRCC6
Bladder Cancer Signaling	2.66	0.155	0.816	CCND1,E2F1,FGF13,KRAS,MMP13,MMP7,MMP9,MYC,PA2G4,PDGFC,RRAS,RRAS2,THBS1,TP53,VEGFA
IL-8 Signaling	2.65	0.125	0.6	BCL2,BCL2L1,CCND1,CXCR2,CYBB,HMOX1,IKBKE,ITGAX,ITGB3,KDR,KRAS,MMP9,PDGFC,PIK3R4,RHOB,RHOC,RHOF,RHOJ,RHOT2,RHOV,RND3,RRAS,RRAS2,SRC,VEGFA
Agranulocyte Adhesion and Diapedesis	2.57	0.125	#NUM!	CCL1,CCL2,CCL3L3,CCL4,Ccl7,CD34,CLDN15,CXCL3,Cxcl3,Cxcl9,CXCR2,EZR,FN1,IL18,IL1A,IL36G,ITGA6,ITGB7,MMP13,MMP7,MMP9,PF4,Ppbp,SELL
Altered T Cell and B Cell Signaling in Rheumatoid Arthritis	2.55	0.156	#NUM!	CSF1,HLA-DMA,HLA-DQB1,HLA-DRB5,IL12B,IL18,IL1A,IL36G,LTB,PRTN3,SPP1,TLR5,TNFSF13,TNFSF13B
Cell Cycle Regulation by BTG Family Proteins	2.54	0.216	0	BTG2,CCND1,E2F1,E2F2,E2F3,E2F8,PPM1L,PRMT1
Glioma Signaling	2.52	0.145	1	CCND1,E2F1,E2F2,E2F3,E2F8,IGF1,IGF2,KRAS,PA2G4,PDGFB,PDGFC,PIK3R4,RRAS,RRAS2,TGFA,TP53
3-phosphoinositide Degradation	2.42	0.13	0.894	DOT1L,DUSP16,DUSP5,EYA4,INPP4B,INPP5J,MINPP1,NT5C,NUDT1,NUDT14,NUDT15,NUDT4,NUDT5,PALD1,PDCD1,PPP1R14B,PPP1R1A,PTPN7,PTPRM,THTPA
Colorectal Cancer Metastasis Signaling	2.41	0.115	0	BCL2L1,CCND1,KRAS,LRP5,MMP13,MMP7,MMP9,MYC,NOS2,PDGFC,PIK3R4,PTGER2,RHOB,RHOC,RHOF,RHOJ,RHOT2,RHOV,RND3,RRAS,RRAS2,SIAH1,SMAD3,SMO,SRC,TGFBR1,TLR5,TP53,VEGFA
HMGB1 Signaling	2.41	0.127	-0.775	CCL2,IL12B,IL18,IL1A,IL36G,KRAS,LTB,PIK3R4,RHOB,RHOC,RHOF,RHOJ,RHOT2,RHOV,RND3,RRAS,RRAS2,SERPINE1,TNFSF12,TNFSF13,TNFSF13B
tRNA Charging	2.39	0.205	0.707	AARS2,DARS2,EPRS1,FARS2,FARSA,LARS2,YARS1,YARS2
Dolichol and Dolichyl Phosphate Biosynthesis	2.34	1	#NUM!	DHDDS,DOLK
Spermidine Biosynthesis I	2.34	1	#NUM!	AMD1,SRM
NRF2-mediated Oxidative Stress Response	2.34	0.122	1.897	AKR7A2,CBR1,CCT7,CDC34,DNAJB4,DNAJB9,DNAJC17,EPHX1,FKBP5,GCLC,GCLM,GSTM1,GSTM3,GSTM4,GSTP1,HMOX1,KRAS,MGST2,MGST3,NQO1,PIK3R4,RRAS,RRAS2
γ-glutamyl Cycle	2.33	0.364	1	ANPEP,GCLC,GCLM,GGT5
Estrogen Receptor Signaling	2.28	0.131	#NUM!	GTF2F2,GTF2H3,GTF2H4,KRAS,MED10,MED17,MED27,MED30,MED31,PCK2,PELP1,POLR2H,RRAS,RRAS2,SRC,TAF4B,TAF5,TBP
Hepatic Fibrosis Signaling Pathway	2.19	0.103	1.48	BCL2,CACNA1A,CACNA1D,CCL2,CCND1,CREB5,CYBB,EDN1,IKBKE,IL18,IL1A,IL36G,ITGB3,KDR,KRAS,LRP5,MMP13,MYC,PDCD4,PDGFB,PDGFC,PIK3R4,RHOB,RHOC,RHOF,RHOJ,RHOT2,RHOV,RND3,RRAS,RRAS2,SERPINE1,SIRT3,SMAD3,SMO,SPP1,TGFBR1,VEGFA
Hereditary Breast Cancer Signaling	2.19	0.129	#NUM!	CCND1,E2F1,FANCE,FANCL,GADD45A,HDAC10,HDAC6,HDAC9,KRAS,NBN,PIK3R4,POLR2H,RFC3,RRAS,RRAS2,SLC19A1,TP53,TUBG1
D-myo-inositol (1,4,5,6)-Tetrakisphosphate Biosynthesis	2.19	0.129	0.943	DOT1L,DUSP16,DUSP5,EYA4,MINPP1,NT5C,NUDT1,NUDT14,NUDT15,NUDT4,NUDT5,PALD1,PDCD1,PPP1R14B,PPP1R1A,PTPN7,PTPRM,THTPA
D-myo-inositol (3,4,5,6)-tetrakisphosphate Biosynthesis	2.19	0.129	0.943	DOT1L,DUSP16,DUSP5,EYA4,MINPP1,NT5C,NUDT1,NUDT14,NUDT15,NUDT4,NUDT5,PALD1,PDCD1,PPP1R14B,PPP1R1A,PTPN7,PTPRM,THTPA
Semaphorin Signaling in Neurons	2.18	0.167	#NUM!	ARHGEF12,CFL2,RHOB,RHOC,RHOF,RHOJ,RHOT2,RHOV,RND3,SEMA7A
Estrogen-mediated S-phase Entry	2.17	0.231	0.816	CCND1,E2F1,E2F2,E2F3,E2F8,MYC
VEGF Signaling	2.17	0.141	-0.632	BCL2,BCL2L1,EIF2B1,EIF2B2,EIF2B3,EIF2B4,KDR,KRAS,PDGFC,PIK3R4,RRAS,RRAS2,SRC,VEGFA
Inhibition of Angiogenesis by TSP1	2.16	0.206	-0.816	KDR,MMP9,SDC1,TGFBR1,THBS1,TP53,VEGFA
3-phosphoinositide Biosynthesis	2.11	0.122	0.894	DOT1L,DUSP16,DUSP5,EYA4,MINPP1,NT5C,NUDT1,NUDT14,NUDT15,NUDT4,NUDT5,PALD1,PDCD1,PIK3R4,PIP4K2C,PPP1R14B,PPP1R1A,PTPN7,PTPRM,THTPA
Cyclins and Cell Cycle Regulation	2.09	0.148	0	CCNB2,CCND1,E2F1,E2F2,E2F3,E2F8,HDAC10,HDAC6,HDAC9,PA2G4,PPM1L,TP53
D-myo-inositol-5-phosphate Metabolism	2.06	0.123	1.147	DOT1L,DUSP16,DUSP5,EYA4,MINPP1,NT5C,NUDT1,NUDT14,NUDT15,NUDT4,NUDT5,PALD1,PDCD1,PIP4K2C,PPP1R14B,PPP1R1A,PTPN7,PTPRM,THTPA
Actin Nucleation by ARP-WASP Complex	2.06	0.153	0	KRAS,NCK2,RHOB,RHOC,RHOF,RHOJ,RHOT2,RHOV,RND3,RRAS,RRAS2
HIF1α Signaling	2.03	0.133	#NUM!	COPS5,EDN1,KRAS,LDHB,MMP13,MMP7,MMP9,NOS2,PDGFC,PIK3R4,RRAS,RRAS2,SLC2A3,TP53,VEGFA
Integrin Signaling	2	0.113	0.816	ARHGAP5,BCAR3,CAV1,ITGA6,ITGAX,ITGB3,ITGB7,KRAS,LIMS1,NCK2,PARVA,PDGFB,PFN2,PIK3R4,RHOB,RHOC,RHOF,RHOJ,RHOT2,RHOV,RND3,RRAS,RRAS2,SRC
Atherosclerosis Signaling	1.95	0.127	#NUM!	ALOX5,APOC2,CCL2,CSF1,IL18,IL1A,IL36G,LPL,MMP13,MMP9,PDGFB,PDGFC,PLA2G4A,S100A8,TNFRSF12A,TNFSF12
Germ Cell-Sertoli Cell Junction Signaling	1.92	0.117	#NUM!	CFL2,EPN2,FER,ITGA6,KRAS,MAP3K9,PIK3R4,RHOB,RHOC,RHOF,RHOJ,RHOT2,RHOV,RND3,RRAS,RRAS2,SRC,TGFBR1,TJP1,TUBG1
Coenzyme A Biosynthesis	1.88	0.667	#NUM!	COASY,PPCDC
Glutathione Biosynthesis	1.88	0.667	#NUM!	GCLC,GCLM
Oxidized GTP and dGTP Detoxification	1.88	0.667	#NUM!	NUDT1,RUVBL2
Superpathway of Inositol Phosphate Compounds	1.84	0.112	0.853	DOT1L,DUSP16,DUSP5,EYA4,INPP5J,IP6K2,MINPP1,NT5C,NUDT1,NUDT14,NUDT15,NUDT4,NUDT5,PALD1,PDCD1,PIK3R4,PIP4K2C,PPP1R14B,PPP1R1A,PTPN7,PTPRM,THTPA
Cholecystokinin/Gastrin-mediated Signaling	1.84	0.126	-0.258	IL18,IL1A,IL36G,KRAS,MEF2C,RHOB,RHOC,RHOF,RHOJ,RHOT2,RHOV,RND3,RRAS,RRAS2,SRC
Telomere Extension by Telomerase	1.8	0.267	#NUM!	NBN,PINX1,XRCC5,XRCC6
Differential Regulation of Cytokine Production in Intestinal Epithelial Cells by IL-17A and IL-17F	1.77	0.217	#NUM!	CCL2,CCL4,IL12B,IL1A,LCN2
Role of BRCA1 in DNA Damage Response	1.73	0.138	1.667	E2F1,E2F2,E2F3,E2F8,FANCE,FANCL,GADD45A,NBN,RFC3,SLC19A1,TP53
Pyrimidine Ribonucleotides Interconversion	1.72	0.171	1.134	AK1,CTPS2,DDX3X,ENTPD1,NME7,NUDT15,NUDT5
Folate Transformations I	1.72	0.333	#NUM!	MTHFD1,MTHFD2,MTHFS
Mismatch Repair in Eukaryotes	1.7	0.25	#NUM!	PCNA,POLD1,RFC3,SLC19A1
Chondroitin Sulfate Degradation (Metazoa)	1.7	0.25	1	ARSB,HEXB,HEXD,HYAL2
Senescence Pathway	1.69	0.102	0.2	CACNA1A,CACNA1D,CCNB2,CCND1,E2F1,E2F2,E2F3,E2F8,ETS1,GADD45A,IKBKE,IL1A,KRAS,MCU,NBN,PCGF6,PDHB,PDHX,PDK3,PIK3R4,PPM1L,RRAS,RRAS2,Saa3,SERPINE1,SMAD3,TGFBR1,TP53
Small Cell Lung Cancer Signaling	1.68	0.141	0.447	BCL2,BCL2L1,CCND1,E2F1,IKBKE,MYC,PA2G4,PIAS3,PIK3R4,TP53
Sumoylation Pathway	1.66	0.126	-0.832	ETS1,PCNA,RFC3,RHOB,RHOC,RHOF,RHOJ,RHOT2,RHOV,RND3,SENP7,SLC19A1,TP53
Phagosome Formation	1.66	0.12	#NUM!	FCGR2B,FCGR3A/FCGR3B,Fcrls,FN1,ITGAX,MARCO,PIK3R4,RHOB,RHOC,RHOF,RHOJ,RHOT2,RHOV,RND3,TLR5
Role of Hypercytokinemia/hyperchemokinemia in the Pathogenesis of Influenza	1.61	0.163	#NUM!	CCL2,CCL4,CCR1,IL12B,IL18,IL1A,IL36G
Pyrimidine Ribonucleotides De Novo Biosynthesis	1.61	0.163	1.134	AK1,CTPS2,DDX3X,ENTPD1,NME7,NUDT15,NUDT5
tRNA Splicing	1.61	0.163	0.378	PDE1B,PDE2A,PDE4B,PDE7B,SMPDL3B,TRPT1,TSEN34
Methylmalonyl Pathway	1.6	0.5	#NUM!	MCEE,PCCB
Acetate Conversion to Acetyl-CoA	1.6	0.5	#NUM!	ACSL1,ACSS2
Ovarian Cancer Signaling	1.58	0.115	0	BCL2,CCND1,E2F1,EDN1,KRAS,MMP7,MMP9,PA2G4,PDGFC,PIK3R4,RRAS,RRAS2,SMO,SRC,TP53,VEGFA
Role of Tissue Factor in Cancer	1.57	0.12	#NUM!	BCL2L1,CFL2,CSF1,ITGA6,ITGB3,KRAS,MMP13,PIK3R4,RPS6KA2,RRAS,RRAS2,SRC,TP53,VEGFA
Hepatic Fibrosis / Hepatic Stellate Cell Activation	1.56	0.108	#NUM!	BCL2,CCL2,CSF1,CXCL3,EDN1,FN1,IGF1,IGF2,IL1A,KDR,MMP13,MMP9,PDGFB,PDGFC,SERPINE1,SMAD3,TGFA,TGFBR1,TIMP2,VEGFA
Nucleotide Excision Repair Pathway	1.54	0.171	#NUM!	ERCC1,ERCC5,GTF2H3,GTF2H4,POLR2H,XPA
Telomerase Signaling	1.54	0.121	-0.333	DKC1,E2F1,ETS1,HDAC10,HDAC6,HDAC9,KRAS,MYC,PIK3R4,PPM1L,RRAS,RRAS2,TP53
Purine Nucleotides Degradation II (Aerobic)	1.52	0.222	-2	ACPP,ADAT3,IMPDH1,NT5C
LPS/IL-1 Mediated Inhibition of RXR Function	1.51	0.103	#NUM!	ACSL1,ACSL3,ALDH1B1,APOC2,CHST11,CHST12,CHST15,CHST2,FABP3,FABP4,FABP5,FABP7,GSTM1,GSTM3,GSTM4,GSTP1,IL18,IL1A,IL36G,IL4I1,MGST2,MGST3,PAPSS2
Macropinocytosis Signaling	1.5	0.132	-0.816	CSF1,ITGB3,ITGB7,KRAS,PDGFB,PDGFC,PIK3R4,RRAS,RRAS2,SRC
p53 Signaling	1.48	0.122	0.707	BCL2,BCL2L1,CCND1,E2F1,GADD45A,HDAC9,PCNA,PERP,PIK3R4,THBS1,TP53,TP53BP2
Systemic Lupus Erythematosus In B Cell Signaling Pathway	1.47	0.0982	0.962	BCL2,BCL2L1,BLNK,CCND1,CD72,FCGR2B,IL12B,IL18,IL1A,IL36G,INPP5J,KRAS,LILRB3,LTB,MAVS,MYC,PDCD1,PIK3R4,RASGRP2,RASGRP3,RRAS,RRAS2,SRC,TICAM1,TNFSF12,TNFSF13,TNFSF13B
Cell Cycle Control of Chromosomal Replication	1.47	0.143	2.828	CDK14,CDK18,CDT1,DBF4,MCM5,PCNA,POLD1,PRIM1
GADD45 Signaling	1.45	0.211	#NUM!	CCND1,GADD45A,PCNA,TP53
Tetrahydrofolate Salvage from 5,10-methenyltetrahydrofolate	1.4	0.4	#NUM!	MTHFD1,MTHFD2
CMP-N-acetylneuraminate Biosynthesis I (Eukaryotes)	1.4	0.4	#NUM!	GNE,NANS
Myo-inositol Biosynthesis	1.4	0.4	#NUM!	IMPA2,ISYNA1
2-oxobutanoate Degradation I	1.4	0.4	#NUM!	MCEE,PCCB
Citrulline-Nitric Oxide Cycle	1.4	0.4	#NUM!	ASL,NOS2
Galactose Degradation I (Leloir Pathway)	1.4	0.4	#NUM!	GALE,GALK1
Assembly of RNA Polymerase I Complex	1.37	0.25	#NUM!	POLR1A,POLR1C,TBP
BER pathway	1.37	0.25	#NUM!	LIG3,PCNA,PNKP
Superpathway of Cholesterol Biosynthesis	1.36	0.172	0.447	EBP,FDFT1,LSS,MVD,MVK
Prostate Cancer Signaling	1.36	0.121	#NUM!	BCL2,CCND1,CREB5,E2F1,GSTP1,KRAS,PA2G4,PIK3R4,RRAS,RRAS2,TP53
Phospholipase C Signaling	1.36	0.0973	1.279	ARHGEF12,ARHGEF18,BLNK,CD3E,CD3G,CREB5,FCGR2B,HDAC10,HDAC6,HDAC9,HMOX1,ITK,KRAS,MEF2C,PLA2G4A,RHOB,RHOC,RHOF,RHOJ,RHOT2,RHOV,RND3,RRAS,RRAS2,SRC
Iron homeostasis signaling pathway	1.35	0.109	#NUM!	ATP6V0A1,ATP6V0D2,ATP6V1G1,BMPR1A,CIAO1,GDF15,HBB,HFE,HMOX1,HSCB,LYRM4,PDGFB,SLC40A1,SLC46A1,SMAD3
Cardiac Hypertrophy Signaling (Enhanced)	1.34	0.0883	0.973	CACNA1A,CACNA1D,CXCR2,CYBB,EDN1,EIF2B1,EIF2B2,EIF2B3,EIF2B4,FGF13,HDAC10,HDAC6,HDAC9,IGF1,IKBKE,IL11RA,IL12B,IL18,IL18R1,IL1A,IL20RB,IL36G,IL3RA,KRAS,LTB,MAP3K9,MEF2C,MKNK1,MYC,PDE1B,PDE2A,PDE4B,PDE7B,PIK3R4,RCAN1,RRAS,RRAS2,SMO,SMPDL3B,TGFBR1,TNFSF12,TNFSF13,TNFSF13B
Hematopoiesis from Pluripotent Stem Cells	1.34	0.143	#NUM!	CD3E,CD3G,CD4,CSF1,IL12B,IL1A,KITLG
Melanoma Signaling	1.3	0.14	-1.134	CCND1,E2F1,KRAS,PIK3R4,RRAS,RRAS2,TP53
T Cell Exhaustion Signaling Pathway	1.3	0.103	0.577	BATF,BCL6,CD274,HLA-DMA,HLA-DQB1,HLA-DRB5,IL12B,KDR,KRAS,LAG3,PDCD1,PIK3R4,PPM1L,RRAS,RRAS2,SMAD3,TGFBR1,VEGFA
Role of Macrophages, Fibroblasts and Endothelial Cells in Rheumatoid Arthritis	1.28	0.0929	#NUM!	CCL2,CCND1,CEBPE,CREB5,CSF1,FCGR3A/FCGR3B,FN1,IKBKE,IL18,IL18R1,IL1A,IL36G,KRAS,LRP5,LTB,MMP13,MYC,NOS2,PDGFB,PDGFC,PIK3R4,RRAS,RRAS2,SMO,SOCS1,SRC,TLR5,TNFSF13B,VEGFA
Role of IL-17A in Psoriasis	1.27	0.231	#NUM!	CXCL3,S100A8,S100A9
Cholesterol Biosynthesis I	1.27	0.231	#NUM!	EBP,FDFT1,LSS
Urate Biosynthesis/Inosine 5'-phosphate Degradation	1.27	0.231	#NUM!	ACPP,IMPDH1,NT5C
NAD Phosphorylation and Dephosphorylation	1.27	0.231	#NUM!	Acp5,ACPP,NADK2
Cholesterol Biosynthesis II (via 24,25-dihydrolanosterol)	1.27	0.231	#NUM!	EBP,FDFT1,LSS
Cholesterol Biosynthesis III (via Desmosterol)	1.27	0.231	#NUM!	EBP,FDFT1,LSS
p38 MAPK Signaling	1.25	0.11	0.905	CREB5,HMGN1,IL18,IL1A,IL36G,MAP4K1,MEF2C,MKNK1,MYC,PLA2G4A,RPS6KA2,TGFBR1,TP53
Urea Cycle	1.24	0.333	#NUM!	ARG1,ASL
Rapoport-Luebering Glycolytic Shunt	1.24	0.333	#NUM!	MINPP1,PGAM2
Non-Small Cell Lung Cancer Signaling	1.24	0.123	-0.707	CCND1,E2F1,KRAS,PA2G4,PIK3R4,RRAS,RRAS2,TGFA,TP53
Communication between Innate and Adaptive Immune Cells	1.22	0.115	#NUM!	CCL3L3,CCL4,CD4,HLA-DRB5,IL12B,IL18,IL1A,IL36G,TLR5,TNFSF13,TNFSF13B
TGF-β Signaling	1.22	0.115	0.632	BCL2,BMPR1A,KRAS,MAP4K1,PMEPA1,RRAS,RRAS2,RUNX3,SERPINE1,SMAD3,TGFBR1
Aryl Hydrocarbon Receptor Signaling	1.22	0.105	-1.134	AHR,ALDH1B1,CCND1,E2F1,GSTM1,GSTM3,GSTM4,GSTP1,IL1A,MGST2,MGST3,MYC,NQO1,SRC,TP53
Estrogen-Dependent Breast Cancer Signaling	1.21	0.122	-0.707	CCND1,CREB5,HSD17B10,IGF1,KRAS,PIK3R4,RRAS,RRAS2,SRC
Role of IL-17F in Allergic Inflammatory Airway Diseases	1.21	0.143	-0.447	CCL2,CCL4,CREB5,IGF1,MMP13,RPS6KA2
Amyotrophic Lateral Sclerosis Signaling	1.2	0.113	-1.667	BCL2,BCL2L1,CACNA1A,CACNA1D,CCS,IGF1,PDGFC,PIK3R4,SSR4,TP53,VEGFA
Colanic Acid Building Blocks Biosynthesis	1.19	0.214	#NUM!	GALE,GALK1,GMDS
PDGF Signaling	1.19	0.116	0	CAV1,INPP5J,KRAS,MYC,PDGFB,PDGFC,PIK3R4,RRAS,RRAS2,SRC
Role of NFAT in Regulation of the Immune Response	1.18	0.0994	-1.414	BLNK,CD3E,CD3G,CD4,CSNK1E,FCGR2B,FCGR3A/FCGR3B,HLA-DMA,HLA-DQB1,HLA-DRB5,IKBKE,ITK,KRAS,MEF2C,PIK3R4,RCAN1,RRAS,RRAS2
TREM1 Signaling	1.18	0.12	-1	CCL2,CIITA,CXCL3,FCGR2B,IL18,ITGAX,Nlrp1a,TLR5,TREM1
Th1 pathway	1.18	0.107	-1.941	CD274,CD3E,CD3G,CD4,HLA-DMA,HLA-DQB1,HLA-DRB5,IL12B,IL18,IL18R1,PIK3R4,RUNX3,SOCS1
Superpathway of D-myo-inositol (1,4,5)-trisphosphate Metabolism	1.18	0.174	-2	BPNT1,IMPA2,INPP5J,MINPP1
Sorbitol Degradation I	1.17	1	#NUM!	SORD
Adenine and Adenosine Salvage VI	1.17	1	#NUM!	ADK
Lanosterol Biosynthesis	1.17	1	#NUM!	LSS
UDP-N-acetyl-D-galactosamine Biosynthesis I	1.17	1	#NUM!	GALE
Oncostatin M Signaling	1.17	0.14	0	CHI3L1,KRAS,MMP13,PLAU,RRAS,RRAS2
Adipogenesis pathway	1.15	0.104	#NUM!	AGPAT2,BMPR1A,DGKD,FABP4,GTF2H3,GTF2H4,HDAC10,HDAC6,HDAC9,KLF5,LPL,SMAD3,SMO,TP53
Myc Mediated Apoptosis Signaling	1.15	0.123	#NUM!	BCL2,IGF1,KRAS,MYC,PIK3R4,RRAS,RRAS2,TP53
Glutathione Redox Reactions I	1.12	0.167	-1	GSTM1,GSTP1,MGST2,MGST3
Superpathway of Citrulline Metabolism	1.12	0.2	#NUM!	ARG1,ASL,NOS2
Adenosine Nucleotides Degradation II	1.12	0.2	#NUM!	ACPP,ADAT3,NT5C
Acetyl-CoA Biosynthesis I (Pyruvate Dehydrogenase Complex)	1.12	0.286	#NUM!	DBT,PDHB
Xenobiotic Metabolism Signaling	1.1	0.0906	#NUM!	AHR,ALDH1B1,CHST11,CHST12,CHST15,CHST2,GCLC,GSTM1,GSTM3,GSTM4,GSTP1,HMOX1,IL1A,IL4I1,KRAS,MAP3K9,MGST2,MGST3,NOS2,NQO1,PIK3R4,PPM1L,RRAS,RRAS2,UGT1A4,UGT1A6
Molecular Mechanisms of Cancer	1.09	0.087	#NUM!	ARHGEF12,ARHGEF18,AURKA,BCL2,BCL2L1,BMPR1A,CCND1,CDK14,CDK18,E2F1,E2F2,E2F3,E2F8,KRAS,LRP5,MYC,NBN,PA2G4,PIK3R4,RHOB,RHOC,RHOF,RHOJ,RHOT2,RHOV,RND3,RRAS,RRAS2,SMAD3,SMO,SRC,TGFBR1,TP53,ZBTB17
PI3K/AKT Signaling	1.09	0.0977	0.632	BCL2,BCL2L1,CCND1,CXCR2,GDF15,IKBKE,IL11RA,IL18R1,IL20RB,IL3RA,INPP5J,KRAS,LIMS1,PPM1L,RRAS,RRAS2,TP53
FAT10 Cancer Signaling Pathway	1.05	0.13	0	IKBKE,MAD2L1,PCNA,SMAD3,TGFBR1,TP53
NAD Salvage Pathway II	1.02	0.154	-1	Acp5,ACPP,NMNAT1,NT5C
Gluconeogenesis I	1.02	0.154	1	ALDOC,MDH1,ME1,PGAM2
MSP-RON Signaling Pathway	1.02	0.121	#NUM!	CCL2,CSF1,IL12B,IL3RA,NOS2,PIK3R4,RPS6KA2
Airway Pathology in Chronic Obstructive Pulmonary Disease	1.01	0.25	#NUM!	CXCL3,MMP9
Histidine Degradation III	1.01	0.25	#NUM!	MTHFD1,MTHFD2
Sphingosine-1-phosphate Signaling	1.01	0.103	1.155	PDGFB,PDGFC,PIK3R4,RHOB,RHOC,RHOF,RHOJ,RHOT2,RHOV,RND3,S1PR1,SMPD1
T Cell Receptor Signaling	1.01	0.105	#NUM!	CD3E,CD3G,CD4,IKBKE,ITK,KRAS,PIK3R4,PTPN7,RRAS,RRAS2,SHB
GM-CSF Signaling	1	0.114	-0.707	BCL2A1,BCL2L1,CCND1,ETS1,KRAS,PIK3R4,RRAS,RRAS2
NF-κB Activation by Viruses	0.991	0.11	-0.333	CD4,IKBKE,ITGA6,ITGB3,KRAS,PIK3R4,RRAS,RRAS2,TBP
Superpathway of Methionine Degradation	0.991	0.135	1.342	MAT2A,MCEE,PCCB,PRMT1,PRMT5
Nur77 Signaling in T Lymphocytes	0.987	0.119	#NUM!	BCL2,CD3E,CD3G,HDAC9,HLA-DMA,HLA-DQB1,HLA-DRB5
Graft-versus-Host Disease Signaling	0.983	0.125	#NUM!	HLA-DMA,HLA-DQB1,HLA-DRB5,IL18,IL1A,IL36G
Dermatan Sulfate Degradation (Metazoa)	0.983	0.176	#NUM!	HEXB,HEXD,HYAL2
D-myo-inositol (1,4,5)-trisphosphate Degradation	0.983	0.176	#NUM!	BPNT1,IMPA2,INPP5J
Endometrial Cancer Signaling	0.959	0.117	0	CCND1,KRAS,MYC,PIK3R4,RRAS,RRAS2,TP53
ERK5 Signaling	0.947	0.111	0	CREB5,KRAS,MEF2C,MYC,RPS6KA2,RRAS,RRAS2,SRC
HER-2 Signaling in Breast Cancer	0.943	0.107	#NUM!	CCND1,ITGB3,ITGB7,KRAS,PARD6A,PIK3R4,RRAS,RRAS2,TP53
Paxillin Signaling	0.943	0.102	-1.134	ITGA6,ITGAX,ITGB3,ITGB7,KRAS,NCK2,PARVA,PIK3R4,RRAS,RRAS2,SRC
LXR/RXR Activation	0.928	0.0992	0.333	APOC2,CCL2,FASN,FDFT1,IL18,IL1A,IL36G,LPL,MMP9,NOS2,S100A8,TTR
Differential Regulation of Cytokine Production in Macrophages and T Helper Cells by IL-17A and IL-17F	0.928	0.167	#NUM!	CCL2,CCL4,IL12B
Valine Degradation I	0.928	0.167	#NUM!	BCAT2,DBT,HIBCH
Th1 and Th2 Activation Pathway	0.928	0.0936	#NUM!	CCR1,CD274,CD3E,CD3G,CD4,HLA-DMA,HLA-DQB1,HLA-DRB5,IL12B,IL18,IL18R1,PIK3R4,RUNX3,S1PR1,SOCS1,TGFBR1
T Helper Cell Differentiation	0.921	0.11	#NUM!	BCL6,HLA-DMA,HLA-DQB1,HLA-DRB5,IL12B,IL18,IL18R1,TGFBR1
Primary Immunodeficiency Signaling	0.921	0.12	#NUM!	BLNK,CD3E,CD4,CIITA,RFXAP,UNG
Pathogenesis of Multiple Sclerosis	0.921	0.222	#NUM!	CCL4,CCR1
Assembly of RNA Polymerase II Complex	0.921	0.12	#NUM!	GTF2H3,GTF2H4,POLR2H,TAF4B,TAF5,TBP
Heme Biosynthesis II	0.921	0.222	#NUM!	HMBS,PPOX
Inhibition of Matrix Metalloproteases	0.917	0.128	0	MMP13,MMP7,MMP9,SDC1,TIMP2
IL-4 Signaling	0.917	0.106	#NUM!	HLA-DMA,HLA-DQB1,HLA-DRB5,INPP5J,KRAS,PIK3R4,RRAS,RRAS2,SOCS1
UVA-Induced MAPK Signaling	0.896	0.102	-0.447	BCL2L1,KRAS,PARP11,PARP3,PIK3R4,RPS6KA2,RRAS,RRAS2,SMPD1,TP53
Hypoxia Signaling in the Cardiovascular System	0.896	0.108	-0.447	CDC34,COPS5,CREB5,EDN1,NQO1,TP53,UBE2G2,VEGFA
Thyroid Cancer Signaling	0.889	0.118	#NUM!	CCND1,KRAS,MYC,RRAS,RRAS2,TP53
UVC-Induced MAPK Signaling	0.889	0.118	0	KRAS,RRAS,RRAS2,SMPD1,SRC,TP53
Type I Diabetes Mellitus Signaling	0.883	0.0991	-0.816	BCL2,CD3E,CD3G,HLA-DMA,HLA-DQB1,HLA-DRB5,IKBKE,IL12B,NOS2,SOCS1,SOCS4
Epoxysqualene Biosynthesis	0.883	0.5	#NUM!	FDFT1
Spermine Biosynthesis	0.883	0.5	#NUM!	AMD1
All-trans-decaprenyl Diphosphate Biosynthesis	0.883	0.5	#NUM!	PDSS2
S-methyl-5'-thioadenosine Degradation II	0.883	0.5	#NUM!	MTAP
Taurine Biosynthesis	0.883	0.5	#NUM!	CSAD
Palmitate Biosynthesis I (Animals)	0.883	0.5	#NUM!	FASN
Sulfate Activation for Sulfonation	0.883	0.5	#NUM!	PAPSS2
Fatty Acid Biosynthesis Initiation II	0.883	0.5	#NUM!	FASN
Glycine Degradation (Creatine Biosynthesis)	0.883	0.5	#NUM!	GATM
GDP-L-fucose Biosynthesis I (from GDP-D-mannose)	0.883	0.5	#NUM!	GMDS
FcγRIIB Signaling in B Lymphocytes	0.873	0.107	-0.447	BLNK,CACNA1A,CACNA1D,FCGR2B,KRAS,PIK3R4,RRAS,RRAS2
Oxidative Ethanol Degradation III	0.873	0.158	#NUM!	ACSL1,ACSS2,ALDH1B1
Production of Nitric Oxide and Reactive Oxygen Species in Macrophages	0.863	0.0904	-1.213	APOC2,CYBB,IKBKE,MAP3K9,NOS2,PIK3R4,PPM1L,PPP1R14B,PPP1R3D,RHOB,RHOC,RHOF,RHOJ,RHOT2,RHOV,RND3,S100A8
Cardiac Hypertrophy Signaling	0.86	0.0875	-0.218	CACNA1A,CACNA1D,EIF2B1,EIF2B2,EIF2B3,EIF2B4,IGF1,KRAS,MAP3K9,MEF2C,PIK3R4,RHOB,RHOC,RHOF,RHOJ,RHOT2,RHOV,RND3,RRAS,RRAS2,TGFBR1
Gαi Signaling	0.854	0.096	0.302	ADORA3,CAV1,CNR2,CXCR2,HCAR2,KRAS,P2RY12,RGS10,RRAS,RRAS2,S1PR1,SRC
Triacylglycerol Biosynthesis	0.848	0.122	-0.447	AGPAT2,AGPAT4,DBT,DGAT2,MBOAT7
Prostanoid Biosynthesis	0.842	0.2	#NUM!	HPGDS,PTGES2
PTEN Signaling	0.836	0.0952	-1.155	BCL2,BCL2L1,BMPR1A,CCND1,CNKSR3,IKBKE,INPP5J,KDR,KRAS,RRAS,RRAS2,TGFBR1
Insulin Receptor Signaling	0.83	0.0935	1.732	EIF2B1,EIF2B2,EIF2B3,EIF2B4,INPP5J,KRAS,PIK3R4,PPP1R14B,PPP1R3D,RPTOR,RRAS,RRAS2,TRIP10
CDP-diacylglycerol Biosynthesis I	0.824	0.15	#NUM!	AGPAT2,AGPAT4,MBOAT7
SAPK/JNK Signaling	0.815	0.098	0	GADD45A,KRAS,MAP3K9,MAP4K1,MAP4K2,MAP4K5,PIK3R4,RRAS,RRAS2,TP53
OX40 Signaling Pathway	0.81	0.1	1.342	BCL2,BCL2L1,CD3E,CD3G,CD4,H2-M2,HLA-DMA,HLA-DQB1,HLA-DRB5
Acute Phase Response Signaling	0.807	0.0894	-1.387	C1R,CFB,FN1,HMOX1,IKBKE,IL18,IL1A,IL36G,KRAS,RRAS,RRAS2,Saa3,SERPINE1,SOCS1,SOCS4,TTR
G-Protein Coupled Receptor Signaling	0.793	0.0846	#NUM!	ADORA2B,ADORA3,CNR2,CREB5,CXCR2,DUSP9,HCAR2,IKBKE,KRAS,P2RY12,PDE1B,PDE2A,PDE4B,PDE7B,PIK3R4,PTGER2,RGS10,RGS18,RRAS,RRAS2,S1PR1,SMPDL3B,SRC
Protein Ubiquitination Pathway	0.783	0.0842	#NUM!	CDC20,CDC34,CRYAB,DNAJB4,DNAJB9,DNAJC17,DNAJC2,DNAJC24,HSCB,HSPA1A/HSPA1B,PSMB7,SASS6,SMO,UBE2G2,UCHL1,UCHL3,USP2,USP22,USP28,USP31,USP42,USP46,USP49
PKCθ Signaling in T Lymphocytes	0.78	0.0903	-1.732	CACNA1A,CACNA1D,CD3E,CD3G,CD4,HLA-DMA,HLA-DQB1,HLA-DRB5,IKBKE,KRAS,MAP3K9,PIK3R4,RRAS,RRAS2
Purine Nucleotides De Novo Biosynthesis II	0.775	0.182	#NUM!	IMPDH1,PFAS
Fatty Acid β-oxidation I	0.775	0.125	1	ACSL1,ACSL3,ECI2,HSD17B10
Renal Cell Carcinoma Signaling	0.762	0.1	-0.447	ETS1,KRAS,PDGFB,PIK3R4,RRAS,RRAS2,TGFA,VEGFA
JAK/Stat Signaling	0.762	0.1	-0.707	BCL2L1,KRAS,PIAS3,PIK3R4,RRAS,RRAS2,SOCS1,SOCS4
mTOR Signaling	0.742	0.0857	0.258	EIF3L,HMOX1,KRAS,PDGFC,PIK3R4,PPM1L,RHOB,RHOC,RHOF,RHOJ,RHOT2,RHOV,RND3,RPS6KA2,RPTOR,RRAS,RRAS2,VEGFA
PD-1, PD-L1 cancer immunotherapy pathway	0.742	0.0943	1	BCL2L1,CD274,HLA-DMA,HLA-DQB1,HLA-DRB5,IL12B,PDCD1,PDCD4,PIK3R4,SMAD3
Polyamine Regulation in Colon Cancer	0.735	0.136	#NUM!	KRAS,MYC,OAZ2
Aldosterone Signaling in Epithelial Cells	0.735	0.0886	1	CRYAB,DNAJB4,DNAJB9,DNAJC17,DNAJC2,DNAJC24,HSCB,HSPA1A/HSPA1B,KRAS,PIK3R4,PIP4K2C,SASS6,SLC12A2,SMO
Phosphatidylglycerol Biosynthesis II (Non-plastidic)	0.735	0.136	#NUM!	AGPAT2,AGPAT4,MBOAT7
Methionine Degradation I (to Homocysteine)	0.735	0.136	#NUM!	MAT2A,PRMT1,PRMT5
IL-10 Signaling	0.733	0.101	#NUM!	CCR1,FCGR2B,HMOX1,IKBKE,IL18,IL1A,IL36G
Regulation of Actin-based Motility by Rho	0.73	0.0957	1	PFN2,PIP4K2C,RHOB,RHOC,RHOF,RHOJ,RHOT2,RHOV,RND3
Melanocyte Development and Pigmentation Signaling	0.73	0.0957	-0.333	BCL2,CREB5,KITLG,KRAS,PIK3R4,RPS6KA2,RRAS,RRAS2,SRC
Virus Entry via Endocytic Pathways	0.726	0.0935	#NUM!	CAV1,FLNB,ITGA6,ITGB3,ITGB7,KRAS,PIK3R4,RRAS,RRAS2,SRC
B Cell Receptor Signaling	0.726	0.0865	0.258	BCL2A1,BCL2L1,BCL6,BLNK,CFL2,CREB5,ETS1,FCGR2B,IKBKE,INPP5J,KRAS,MAP3K9,MEF2C,PIK3R4,RRAS,RRAS2
Methylglyoxal Degradation I	0.721	0.333	#NUM!	HAGHL
5-aminoimidazole Ribonucleotide Biosynthesis I	0.721	0.333	#NUM!	PFAS
Tetrahydrobiopterin Biosynthesis I	0.721	0.333	#NUM!	PTS
D-glucuronate Degradation I	0.721	0.333	#NUM!	DCXR
Hypusine Biosynthesis	0.721	0.333	#NUM!	DOHH
Tetrahydrobiopterin Biosynthesis II	0.721	0.333	#NUM!	PTS
S-adenosyl-L-methionine Biosynthesis	0.721	0.333	#NUM!	MAT2A
PEDF Signaling	0.721	0.0976	-1.414	BCL2,BCL2L1,IKBKE,KRAS,PIK3R4,RRAS,RRAS2,TP53
4-aminobutyrate Degradation I	0.721	0.333	#NUM!	SUCLG2
Hematopoiesis from Multipotent Stem Cells	0.714	0.167	#NUM!	CSF1,KITLG
Glycogen Degradation II	0.714	0.167	#NUM!	MTAP,PYGM
Guanosine Nucleotides Degradation III	0.714	0.167	#NUM!	ACPP,NT5C
CDK5 Signaling	0.708	0.0926	0.333	CABLES1,CACNA1A,CDK5R1,ITGA6,KRAS,PPM1L,PPP1R14B,PPP1R3D,RRAS,RRAS2
Dermatan Sulfate Biosynthesis (Late Stages)	0.701	0.109	1.342	CHST11,CHST12,CHST14,CHST15,CHST2
Stearate Biosynthesis I (Animals)	0.701	0.109	0.447	ACSL1,ACSL3,DBT,FASN,MBOAT7
Ethanol Degradation IV	0.695	0.13	#NUM!	ACSL1,ACSS2,ALDH1B1
Glucocorticoid Receptor Signaling	0.69	0.0804	#NUM!	BCL2,BCL2L1,CCL2,CD3E,CD3G,CXCL3,FKBP5,GTF2F2,GTF2H3,GTF2H4,HSPA1A/HSPA1B,IKBKE,KRAS,KRT86,NOS2,PCK2,PIK3R4,PLAU,POLR2H,RRAS,RRAS2,SERPINE1,SMAD3,TAF4B,TAF5,TBP,TGFBR1
Dermatan Sulfate Biosynthesis	0.682	0.102	1.633	B3GALT6,CHST11,CHST12,CHST14,CHST15,CHST2
Coagulation System	0.678	0.114	-1	PLAU,PROS1,SERPINE1,TFPI
Systemic Lupus Erythematosus Signaling	0.678	0.083	#NUM!	CD3E,CD3G,CD72,FCGR2B,FCGR3A/FCGR3B,IL18,IL1A,IL36G,KRAS,LSM14B,LSM5,PIK3R4,PRPF40B,RRAS,RRAS2,SNRNP25,SNRNP40,SNRPA1,TNFSF13B
Th2 Pathway	0.676	0.0882	-1.414	CCR1,CD3E,CD3G,CD4,HLA-DMA,HLA-DQB1,HLA-DRB5,IL12B,PIK3R4,RUNX3,S1PR1,TGFBR1
HIPPO signaling	0.664	0.0941	0	CSNK1E,PPM1L,PPP1R14B,PPP1R3D,SMAD3,TJP2,TP53BP2,WWTR1
Fatty Acid Activation	0.66	0.154	#NUM!	ACSL1,ACSL3
Cysteine Biosynthesis III (mammalia)	0.658	0.125	#NUM!	MAT2A,PRMT1,PRMT5
Caveolar-mediated Endocytosis Signaling	0.65	0.0959	#NUM!	CAV1,FLNB,ITGA6,ITGAX,ITGB3,ITGB7,SRC
Nitric Oxide Signaling in the Cardiovascular System	0.644	0.0909	-0.333	CACNA1A,CACNA1D,CAV1,KDR,PDE1B,PDE2A,PDGFC,PIK3R4,VEGFA
Apoptosis Signaling	0.644	0.0909	1	AIFM1,BCL2,BCL2A1,BCL2L1,IKBKE,KRAS,RRAS,RRAS2,TP53
Cell Cycle: G2/M DNA Damage Checkpoint Regulation	0.627	0.102	0	AURKA,CCNB2,CKS2,GADD45A,TP53
Tryptophan Degradation X (Mammalian, via Tryptamine)	0.623	0.12	#NUM!	ALDH1B1,IL4I1,RDH14
Complement System	0.62	0.108	#NUM!	C1R,CFB,CFH,ITGAX
NGF Signaling	0.613	0.0877	0	CREB5,IKBKE,KRAS,MAP3K9,PIK3R4,RPS6KA2,RRAS,RRAS2,SMPD1,TP53
Glycogen Degradation III	0.613	0.143	#NUM!	MTAP,PYGM
Mevalonate Pathway I	0.613	0.143	#NUM!	MVD,MVK
Ceramide Signaling	0.611	0.0909	0.378	BCL2,KRAS,PIK3R4,PPM1L,RRAS,RRAS2,S1PR1,SMPD1
Heme Degradation	0.611	0.25	#NUM!	HMOX1
PRPP Biosynthesis I	0.611	0.25	#NUM!	PRPS2
Branched-chain α-keto acid Dehydrogenase Complex	0.611	0.25	#NUM!	DBT
Heme Biosynthesis from Uroporphyrinogen-III I	0.611	0.25	#NUM!	PPOX
α-tocopherol Degradation	0.611	0.25	#NUM!	CYP4F2
Melatonin Degradation II	0.611	0.25	#NUM!	IL4I1
Arginine Degradation I (Arginase Pathway)	0.611	0.25	#NUM!	ARG1
Fatty Acid β-oxidation III (Unsaturated, Odd Number)	0.611	0.25	#NUM!	ECI2
Endocannabinoid Developing Neuron Pathway	0.599	0.087	-1.265	CCND1,CNR2,CREB5,KRAS,MGLL,PIK3R4,RPTOR,RRAS,RRAS2,SRC
Docosahexaenoic Acid (DHA) Signaling	0.593	0.105	#NUM!	BCL2,BCL2A1,BCL2L1,PIK3R4
Acute Myeloid Leukemia Signaling	0.593	0.0899	0	CCND1,CSF3R,KITLG,KRAS,MYC,PIK3R4,RRAS,RRAS2
Regulation of IL-2 Expression in Activated and Anergic T Lymphocytes	0.593	0.0899	#NUM!	CD3E,CD3G,IKBKE,KRAS,RRAS,RRAS2,SMAD3,TGFBR1
Antiproliferative Role of TOB in T Cell Signaling	0.59	0.115	#NUM!	CDC34,SMAD3,TGFBR1
Glycolysis I	0.59	0.115	#NUM!	ALDOC,PFKP,PGAM2
Reelin Signaling in Neurons	0.588	0.0853	0.302	ARHGEF12,CDK5R1,CNR2,ITGA6,ITGB3,LRP8,MAP3K9,MAP4K1,PDK3,PIK3R4,SRC
Leukocyte Extravasation Signaling	0.583	0.0812	0.277	ARHGAP5,CLDN15,CYBB,EZR,FER,ITGA6,ITGB3,ITK,JAM2,MMP13,MMP7,MMP9,PIK3R4,SRC,THY1,TIMP2
Mouse Embryonic Stem Cell Pluripotency	0.58	0.0874	-0.333	BMPR1A,ID1,KRAS,MYC,PIK3R4,RRAS,RRAS2,SMO,TP53
Osteoarthritis Pathway	0.578	0.0806	0.775	ANKH,BMPR1A,CREB5,CXCR2,FN1,MEF2C,MMP13,MMP9,NOS2,PDGFC,S100A8,S100A9,SMAD3,SMO,SPP1,TGFBR1,VEGFA
Isoleucine Degradation I	0.569	0.133	#NUM!	BCAT2,HSD17B10
Antigen Presentation Pathway	0.569	0.103	#NUM!	CIITA,HLA-DMA,HLA-DQB1,HLA-DRB5
PPAR Signaling	0.565	0.0865	0.333	IKBKE,IL18,IL1A,IL36G,KRAS,PDGFB,PDGFC,RRAS,RRAS2
ErbB2-ErbB3 Signaling	0.558	0.0923	0	CCND1,KRAS,MYC,PIK3R4,RRAS,RRAS2
Regulation of Cellular Mechanics by Calpain Protease	0.558	0.0923	-1.342	CCND1,EZR,KRAS,RRAS,RRAS2,SRC
Breast Cancer Regulation by Stathmin1	0.551	0.08	#NUM!	ARHGEF12,ARHGEF18,E2F1,E2F2,E2F3,E2F8,KRAS,PIK3R4,PPM1L,PPP1R14B,PPP1R3D,RRAS,RRAS2,STMN1,TP53,TUBG1
cAMP-mediated signaling	0.547	0.0789	-0.943	ADORA2B,ADORA3,CNR2,CREB5,CXCR2,DUSP9,HCAR2,P2RY12,PDE1B,PDE2A,PDE4B,PDE7B,PTGER2,RGS10,RGS18,S1PR1,SMPDL3B,SRC
Calcium-induced T Lymphocyte Apoptosis	0.539	0.0909	-1.633	CD3E,CD3G,CD4,HLA-DMA,HLA-DQB1,HLA-DRB5
Mitotic Roles of Polo-Like Kinase	0.539	0.0909	1.342	CCNB2,CDC20,FBXO5,PLK3,PLK4,PPM1L
Eicosanoid Signaling	0.539	0.0909	#NUM!	ALOX5,HPGDS,LTC4S,PLA2G4A,PTGER2,PTGES2
Extrinsic Prothrombin Activation Pathway	0.529	0.125	#NUM!	PROS1,TFPI
Glutaryl-CoA Degradation	0.529	0.125	#NUM!	GCDH,HSD17B10
Protein Citrullination	0.529	0.2	#NUM!	PADI4
Creatine-phosphate Biosynthesis	0.529	0.2	#NUM!	CKB
Serine Biosynthesis	0.529	0.2	#NUM!	PSAT1
Tetrapyrrole Biosynthesis II	0.529	0.2	#NUM!	HMBS
Glutamate Degradation III (via 4-aminobutyrate)	0.529	0.2	#NUM!	SUCLG2
Folate Polyglutamylation	0.529	0.2	#NUM!	MTHFD1
Parkinson's Signaling	0.529	0.125	#NUM!	SEPTIN5,UCHL1
Role of IL-17A in Arthritis	0.52	0.0926	#NUM!	CCL2,CXCL3,MMP13,NOS2,PIK3R4
Prolactin Signaling	0.51	0.0864	-0.378	KRAS,MYC,PIK3R4,RRAS,RRAS2,SOCS1,SOCS4
Role of p14/p19ARF in Tumor Suppression	0.504	0.103	#NUM!	E2F1,PIK3R4,TP53
Inhibition of ARE-Mediated mRNA Degradation Pathway	0.504	0.082	-1.667	AGO1,CNOT8,EXOSC4,EXOSC5,EXOSC6,LTB,PPM1L,TNFSF12,TNFSF13,TNFSF13B
Ubiquinol-10 Biosynthesis (Eukaryotic)	0.492	0.118	#NUM!	COQ3,MICAL2
γ-linolenate Biosynthesis II (Animals)	0.492	0.118	#NUM!	ACSL1,ACSL3
Mitochondrial L-carnitine Shuttle Pathway	0.492	0.118	#NUM!	ACSL1,ACSL3
Histamine Degradation	0.492	0.118	#NUM!	ALDH1B1,HNMT
Role of JAK1 and JAK3 in γc Cytokine Signaling	0.488	0.087	#NUM!	BLNK,KRAS,PIK3R4,RRAS,RRAS2,SOCS1
Systemic Lupus Erythematosus In T Cell Signaling Pathway	0.488	0.0751	0.626	BCL6,CD3E,CD3G,CREB5,EZR,GADD45A,H2-M2,HLA-DMA,HLA-DQB1,HLA-DRB5,IL12B,KRAS,NOS2,PIK3R4,PPM1L,RHOB,RHOC,RHOF,RHOJ,RHOT2,RHOV,RND3,RPTOR,RRAS,RRAS2
Phagosome Maturation	0.487	0.0795	#NUM!	ATP6V0A1,ATP6V0D2,ATP6V1G1,BET1L,CTSE,CYBB,DYNLT1,HLA-DRB5,NAPA,TUBD1,TUBG1,VPS28
Chondroitin Sulfate Biosynthesis	0.483	0.0893	2.236	B3GALT6,CHST11,CHST12,CHST15,CHST2
Unfolded protein response	0.483	0.0893	1	BCL2,CEBPE,DNAJB9,HSPA1A/HSPA1B,PPP1R15A
BAG2 Signaling Pathway	0.479	0.093	1	HSPA1A/HSPA1B,MYC,SIRT3,TP53
ATM Signaling	0.475	0.0825	0.816	BRAT1,CCNB2,CREB5,GADD45A,NBN,PPM1L,TP53,TRIM28
PAK Signaling	0.475	0.0825	-0.378	CFL2,KRAS,NCK2,PDGFB,PDGFC,PIK3R4,RRAS,RRAS2
RhoGDI Signaling	0.475	0.0778	-1.069	ARHGAP5,ARHGEF12,ARHGEF18,CFL2,EZR,PIP4K2C,RHOB,RHOC,RHOF,RHOJ,RHOT2,RHOV,RND3,SRC
iCOS-iCOSL Signaling in T Helper Cells	0.471	0.0811	-1.89	CD3E,CD3G,CD4,HLA-DMA,HLA-DQB1,HLA-DRB5,IKBKE,ITK,PIK3R4
IL-6 Signaling	0.469	0.08	-1.265	IKBKE,IL18,IL1A,IL36G,KRAS,PIK3R4,RRAS,RRAS2,SOCS1,VEGFA
VEGF Family Ligand-Receptor Interactions	0.466	0.0833	-1.134	KDR,KRAS,PIK3R4,PLA2G4A,RRAS,RRAS2,VEGFA
CXCR4 Signaling	0.465	0.0778	-0.832	CD4,KRAS,PIK3R4,RHOB,RHOC,RHOF,RHOJ,RHOT2,RHOV,RND3,RRAS,RRAS2,SRC
CNTF Signaling	0.465	0.0877	-0.447	KRAS,PIK3R4,RPS6KA2,RRAS,RRAS2
Arginine Biosynthesis IV	0.463	0.167	#NUM!	ASL
Proline Biosynthesis II (from Arginine)	0.463	0.167	#NUM!	PADI4
Pyruvate Fermentation to Lactate	0.463	0.167	#NUM!	LDHB
Arginine Degradation VI (Arginase 2 Pathway)	0.463	0.167	#NUM!	ARG1
Glycerol Degradation I	0.463	0.167	#NUM!	GK
Glycine Cleavage Complex	0.463	0.167	#NUM!	GCSH
Adenine and Adenosine Salvage III	0.463	0.167	#NUM!	ADAT3
NAD Biosynthesis III	0.463	0.167	#NUM!	NMNAT1
Lactose Degradation III	0.463	0.167	#NUM!	GLB1
D-myo-inositol (1,3,4)-trisphosphate Biosynthesis	0.46	0.111	#NUM!	INPP5J,MINPP1
Superpathway of Geranylgeranyldiphosphate Biosynthesis I (via Mevalonate)	0.46	0.111	#NUM!	MVD,MVK
Rac Signaling	0.458	0.0804	0.333	CDK5R1,CFL2,CYBB,KRAS,PARD6A,PIK3R4,PIP4K2C,RRAS,RRAS2
FXR/RXR Activation	0.457	0.0794	#NUM!	APOC2,FASN,IL18,IL1A,IL36G,LPL,PCK2,SDC1,SLC4A2,TTR
Growth Hormone Signaling	0.457	0.0845	0	IGF1,IGF2,PIK3R4,RPS6KA2,SOCS1,SOCS4
EIF2 Signaling	0.457	0.0759	1.069	AGO1,ATF5,BCL2,CCND1,EIF2B1,EIF2B2,EIF2B3,EIF2B4,EIF3L,KRAS,MYC,PIK3R4,PPP1R15A,Rpl22l1,RRAS,RRAS2,VEGFA
Role of Pattern Recognition Receptors in Recognition of Bacteria and Viruses	0.456	0.0779	1	IL12B,IL18,IL1A,IL36G,LTB,MAVS,PIK3R4,TICAM1,TLR5,TNFSF12,TNFSF13,TNFSF13B
Dendritic Cell Maturation	0.446	0.0765	-3.317	CD1D,CREB5,FCGR2B,FCGR3A/FCGR3B,HLA-DMA,HLA-DQB1,HLA-DRB5,IKBKE,IL12B,IL18,IL1A,IL36G,LTB,PIK3R4
Cardiac β-adrenergic Signaling	0.445	0.078	-0.905	CACNA1A,CACNA1D,PDE1B,PDE2A,PDE4B,PDE7B,PPM1L,PPP1R14B,PPP1R1A,PPP1R3D,SMPDL3B
Ethanol Degradation II	0.432	0.0938	#NUM!	ACSL1,ACSS2,ALDH1B1
DNA damage-induced 14-3-3σ Signaling	0.429	0.105	#NUM!	CCNB2,TP53
Sertoli Cell-Sertoli Cell Junction Signaling	0.428	0.0757	#NUM!	CLDN15,EPN2,JAM2,KRAS,MAP3K9,MPP6,NOS2,RRAS,RRAS2,SRC,TJAP1,TJP1,TJP2,TUBG1
Regulation of eIF4 and p70S6K Signaling	0.426	0.0764	-1.342	AGO1,EIF2B1,EIF2B2,EIF2B3,EIF2B4,EIF3L,KRAS,MKNK1,PIK3R4,PPM1L,RRAS,RRAS2
Endocannabinoid Cancer Inhibition Pathway	0.425	0.0769	0.302	CCND1,CNR2,CREB5,MYC,NOS2,PDGFC,PIK3R4,RPTOR,SMPD1,SRC,VEGFA
NAD Biosynthesis from 2-amino-3-carboxymuconate Semialdehyde	0.411	0.143	#NUM!	NMNAT1
Superpathway of Serine and Glycine Biosynthesis I	0.411	0.143	#NUM!	PSAT1
NAD Salvage Pathway III	0.411	0.143	#NUM!	NMNAT1
Purine Ribonucleosides Degradation to Ribose-1-phosphate	0.411	0.143	#NUM!	ADAT3
Glycoaminoglycan-protein Linkage Region Biosynthesis	0.411	0.143	#NUM!	B3GALT6
Aspartate Degradation II	0.411	0.143	#NUM!	MDH1
Circadian Rhythm Signaling	0.41	0.0909	#NUM!	CREB5,CSNK1E,NR1D1
Signaling by Rho Family GTPases	0.41	0.0738	1.213	ARHGEF12,ARHGEF18,CFL2,CYBB,EZR,MAP3K9,PARD6A,PIK3R4,PIP4K2C,RHOB,RHOC,RHOF,RHOJ,RHOT2,RHOV,RND3,SEPTIN5,STMN1
Cardiomyocyte Differentiation via BMP Receptors	0.401	0.1	#NUM!	BMPR1A,MEF2C
The Visual Cycle	0.401	0.1	#NUM!	RDH12,RDH14
IL-2 Signaling	0.4	0.082	-0.447	KRAS,PIK3R4,RRAS,RRAS2,SOCS1
Autophagy	0.4	0.082	#NUM!	BCL2,CTSE,MAP1LC3A,PIK3R4,WIPI1
Cytotoxic T Lymphocyte-mediated Apoptosis of Target Cells	0.389	0.0882	#NUM!	BCL2,CD3E,CD3G
IGF-1 Signaling	0.389	0.0769	-0.378	IGF1,IGFBP2,KRAS,PIK3R4,RRAS,RRAS2,SOCS1,SOCS4
Erythropoietin Signaling	0.386	0.0789	#NUM!	KRAS,PIK3R4,RRAS,RRAS2,SOCS1,SRC
Chondroitin Sulfate Biosynthesis (Late Stages)	0.386	0.0833	2	CHST11,CHST12,CHST15,CHST2
Toll-like Receptor Signaling	0.386	0.0789	0.447	IL12B,IL18,IL1A,IL36G,TICAM1,TLR5
Neurotrophin/TRK Signaling	0.386	0.0789	-1.633	CREB5,KRAS,PIK3R4,RRAS,RRAS2,SPRY1
Maturity Onset Diabetes of Young (MODY) Signaling	0.376	0.0952	#NUM!	CACNA1A,CACNA1D
Role of Osteoblasts, Osteoclasts and Chondrocytes in Rheumatoid Arthritis	0.376	0.0727	#NUM!	BCL2,BMPR1A,CSF1,IGF1,IKBKE,IL18,IL18R1,IL1A,IL36G,ITGB3,LRP5,MMP13,PIK3R4,SMO,SPP1,SRC
Putrescine Degradation III	0.376	0.0952	#NUM!	ALDH1B1,IL4I1
Antiproliferative Role of Somatostatin Receptor 2	0.374	0.0779	-1.342	KRAS,NT5C,PIK3R4,RRAS,RRAS2,SRC
Thrombopoietin Signaling	0.372	0.0794	-0.447	KRAS,MYC,PIK3R4,RRAS,RRAS2
CD28 Signaling in T Helper Cells	0.371	0.075	-1	CD3E,CD3G,CD4,HLA-DMA,HLA-DQB1,HLA-DRB5,IKBKE,ITK,PIK3R4
TWEAK Signaling	0.371	0.0857	#NUM!	IKBKE,TNFRSF12A,TNFSF12
IL-17A Signaling in Fibroblasts	0.371	0.0857	#NUM!	CCL2,IKBKE,LCN2
Inositol Pyrophosphates Biosynthesis	0.368	0.125	#NUM!	IP6K2
Superoxide Radicals Degradation	0.368	0.125	#NUM!	NQO1
Sphingomyelin Metabolism	0.368	0.125	#NUM!	SMPD1
Tec Kinase Signaling	0.363	0.0732	0.302	GTF2I,ITK,PIK3R4,RHOB,RHOC,RHOF,RHOJ,RHOT2,RHOV,RND3,SRC,TNFSF12
Clathrin-mediated Endocytosis Signaling	0.362	0.0725	#NUM!	APOC2,FGF13,IGF1,ITGB3,ITGB7,MYO1E,PDGFB,PDGFC,PIK3R4,RAB11A,S100A8,SH3GL1,SRC,VEGFA
Heparan Sulfate Biosynthesis	0.362	0.0769	2.449	B3GALT6,CHST11,CHST12,CHST15,CHST2,EXTL3
ERK/MAPK Signaling	0.362	0.0725	-1.604	CREB5,DUSP9,ETS1,KRAS,MKNK1,MYC,PIK3R4,PLA2G4A,PPM1L,PPP1R14B,PPP1R3D,RRAS,RRAS2,SRC
IL-7 Signaling Pathway	0.362	0.0769	1.342	BCL2,BCL6,CCND1,MYC,PIK3R4,SOCS1
NF-κB Signaling	0.358	0.0726	0.277	BMPR1A,IL18,IL1A,IL36G,KDR,KRAS,PIK3R4,RRAS,RRAS2,TGFA,TGFBR1,TLR5,TNFSF13B
B Cell Development	0.353	0.0833	#NUM!	HLA-DMA,HLA-DQB1,HLA-DRB5
Interferon Signaling	0.353	0.0833	#NUM!	BCL2,IFITM2,SOCS1
Pyrimidine Deoxyribonucleotides De Novo Biosynthesis I	0.352	0.0909	#NUM!	AK1,NME7
Agrin Interactions at Neuromuscular Junction	0.349	0.0759	0	ITGA6,ITGB3,KRAS,RRAS,RRAS2,SRC
RhoA Signaling	0.342	0.0732	2.333	ARHGAP5,ARHGEF12,CFL2,EZR,IGF1,PFN2,PIP4K2C,RND3,SEPTIN5
IL-17 Signaling	0.337	0.075	#NUM!	CCL2,KRAS,NOS2,PIK3R4,RRAS,RRAS2
FLT3 Signaling in Hematopoietic Progenitor Cells	0.337	0.075	-0.816	CREB5,KRAS,PIK3R4,RPS6KA2,RRAS,RRAS2
Role of MAPK Signaling in the Pathogenesis of Influenza	0.337	0.075	#NUM!	BCL2,CCL2,KRAS,PLA2G4A,RRAS,RRAS2
Chemokine Signaling	0.337	0.075	-0.816	CCL2,CCL4,KRAS,RRAS,RRAS2,SRC
Notch Signaling	0.335	0.0811	#NUM!	DTX3,MAML3,MFNG
Sucrose Degradation V (Mammalian)	0.33	0.111	#NUM!	ALDOC
Citrulline Biosynthesis	0.33	0.111	#NUM!	ARG1
Leucine Degradation I	0.33	0.111	#NUM!	BCAT2
Tryptophan Degradation III (Eukaryotic)	0.33	0.087	#NUM!	GCDH,HSD17B10
UDP-N-acetyl-D-galactosamine Biosynthesis II	0.33	0.111	#NUM!	GALE
Neuregulin Signaling	0.321	0.0729	0.378	CDK5R1,KRAS,MYC,RRAS,RRAS2,SRC,TGFA
Hepatic Cholestasis	0.32	0.0707	#NUM!	IKBKE,IL12B,IL18,IL1A,IL36G,LTB,MAP4K2,SLC4A2,SLCO3A1,TJP2,TNFSF12,TNFSF13,TNFSF13B
Lymphotoxin β Receptor Signaling	0.312	0.0755	#NUM!	BCL2L1,IKBKE,LTB,PIK3R4
Gαq Signaling	0.302	0.0701	-0.302	HMOX1,IKBKE,PIK3R4,RGS18,RHOB,RHOC,RHOF,RHOJ,RHOT2,RHOV,RND3
Role of Cytokines in Mediating Communication between Immune Cells	0.299	0.0741	#NUM!	IL12B,IL18,IL1A,IL36G
Dolichyl-diphosphooligosaccharide Biosynthesis	0.298	0.1	#NUM!	ALG3
SPINK1 General Cancer Pathway	0.297	0.0725	-1.342	KRAS,Mt2,PIK3R4,RRAS,RRAS2
Wnt/β-catenin Signaling	0.293	0.0694	1.732	CCND1,CSNK1E,LRP5,MAP4K1,MMP7,MYC,PPM1L,RUVBL2,SMO,SRC,TGFBR1,TP53
HOTAIR Regulatory Pathway	0.287	0.0692	0.905	AGO1,DZIP3,JAM2,LAMTOR5,MMP13,MMP7,MMP9,MYC,PIK3R4,RHOC,SPP1
BMP signaling pathway	0.285	0.0706	-0.447	BMPR1A,FST,KRAS,MAGED1,RRAS,RRAS2
Apelin Endothelial Signaling Pathway	0.283	0.0696	-0.378	CCL2,KLF2,KRAS,MEF2C,PIK3R4,RRAS,RRAS2,SMAD3
IL-15 Signaling	0.275	0.0704	#NUM!	BCL2L1,KRAS,PIK3R4,RRAS,RRAS2
Heparan Sulfate Biosynthesis (Late Stages)	0.275	0.0704	2.236	CHST11,CHST12,CHST15,CHST2,EXTL3
nNOS Signaling in Skeletal Muscle Cells	0.274	0.0732	#NUM!	CACNA1A,CACNA1D,SNTA1
Lipid Antigen Presentation by CD1	0.272	0.0769	#NUM!	CD1D,CD3E
Mineralocorticoid Biosynthesis	0.269	0.0909	#NUM!	EBP
MIF Regulation of Innate Immunity	0.261	0.0714	#NUM!	NOS2,PLA2G4A,TP53
Retinol Biosynthesis	0.261	0.0714	#NUM!	LPL,RDH12,RDH14
Cancer Drug Resistance By Drug Efflux	0.253	0.069	#NUM!	KRAS,RRAS,RRAS2,TP53
Cleavage and Polyadenylation of Pre-mRNA	0.245	0.0833	#NUM!	CPSF4
Glucocorticoid Biosynthesis	0.245	0.0833	#NUM!	EBP
Assembly of RNA Polymerase III Complex	0.223	0.0769	#NUM!	TBP
NAD biosynthesis II (from tryptophan)	0.223	0.0769	#NUM!	NMNAT1
Pregnenolone Biosynthesis	0.223	0.0769	#NUM!	MICAL2
DNA Double-Strand Break Repair by Homologous Recombination	0.203	0.0714	#NUM!	NBN
Phenylalanine Degradation IV (Mammalian, via Side Chain)	0.203	0.0714	#NUM!	IL4I1
Natural Killer Cell Signaling	0	0.0588	#NUM!	FCGR3A/FCGR3B,INPP5J,KRAS,PIK3R4,RRAS,RRAS2,SH2D1B
Synaptic Long Term Potentiation	0	0.0543	-1.134	CREB5,KRAS,PPP1R14B,PPP1R1A,PPP1R3D,RRAS,RRAS2
Axonal Guidance Signaling	0	0.0495	#NUM!	ADAMTS1,ARHGEF12,CFL2,COPS5,IGF1,KRAS,MKNK1,MMP13,MMP7,MMP9,NCK2,NTN4,NTNG2,PDGFB,PDGFC,PFN2,PIK3R4,RRAS,RRAS2,SEMA4B,SEMA7A,SMO,TUBG1,VEGFA
Fc Epsilon RI Signaling	0	0.0513	0	INPP5J,KRAS,PIK3R4,PLA2G4A,RRAS,RRAS2
Actin Cytoskeleton Signaling	0	0.0596	-0.333	ARHGEF12,CFL2,EZR,FGF13,FN1,KRAS,NCKAP1L,PDGFB,PDGFC,PFN2,PIK3R4,RRAS,RRAS2
Synaptic Long Term Depression	0	0.0529	-0.333	CACNA1A,CACNA1D,IGF1,KRAS,NOS2,NT5C,PLA2G4A,PPM1L,RRAS,RRAS2
Huntington's Disease Signaling	0	0.0633	0.447	BCL2L1,BET1L,CDK5R1,CREB5,HDAC10,HDAC6,HDAC9,HSPA1A/HSPA1B,IGF1,NAPA,PENK,PIK3R4,POLR2H,TBP,TP53
PPARα/RXRα Activation	0	0.0526	1.265	FASN,GK,IKBKE,KRAS,LPL,MEF2C,RRAS,RRAS2,SMAD3,TGFBR1
Mitochondrial Dysfunction	0	0.0585	#NUM!	AIFM1,BCL2,COX11,HSD17B10,NDUFA7,NDUFA9,NDUFAF2,NDUFB4,NDUFB7,RHOT2
VDR/RXR Activation	0	0.0641	#NUM!	CAMP,GADD45A,LRP5,SERPINB1,SPP1
PXR/RXR Activation	0	0.0462	#NUM!	GSTM1,PAPSS2,PCK2
Tight Junction Signaling	0	0.0655	#NUM!	BET1L,CLDN15,CNKSR3,CPSF4,JAM2,NAPA,PARD6A,PPM1L,TGFBR1,TJP1,TJP2
TR/RXR Activation	0	0.0595	#NUM!	FASN,ME1,PFKP,PIK3R4,THRSP
RAR Activation	0	0.0518	#NUM!	GTF2H3,GTF2H4,IL3RA,PRMT1,PRMT2,RDH12,RDH14,SMAD3,SRC,VEGFA
14-3-3-mediated Signaling	0	0.0472	-1	KRAS,PIK3R4,RRAS,RRAS2,SRC,TUBG1
α-Adrenergic Signaling	0	0.0421	0	KRAS,PYGM,RRAS,RRAS2
Activation of IRF by Cytosolic Pattern Recognition Receptors	0	0.0317	#NUM!	IKBKE,MAVS
Fcγ Receptor-mediated Phagocytosis in Macrophages and Monocytes	0	0.0638	0	EZR,FCGR3A/FCGR3B,HMOX1,NCK2,RAB11A,SRC
IL-12 Signaling and Production in Macrophages	0	0.0606	#NUM!	APOC2,IKBKE,IL12B,IL18,JMJD6,NOS2,PIK3R4,S100A8
Role of RIG1-like Receptors in Antiviral Innate Immunity	0	0.0455	#NUM!	IKBKE,MAVS
Role of PKR in Interferon Induction and Antiviral Response	0	0.0488	#NUM!	IKBKE,TP53
LPS-stimulated MAPK Signaling	0	0.061	-1.342	IKBKE,KRAS,PIK3R4,RRAS,RRAS2
CCR5 Signaling in Macrophages	0	0.0638	#NUM!	CACNA1A,CACNA1D,CCL4,CD3E,CD3G,CD4
CD40 Signaling	0	0.0308	#NUM!	IKBKE,PIK3R4
CD27 Signaling in Lymphocytes	0	0.0566	#NUM!	BCL2L1,IKBKE,MAP3K9
IL-3 Signaling	0	0.0633	-0.447	IL3RA,KRAS,PIK3R4,RRAS,RRAS2
fMLP Signaling in Neutrophils	0	0.0431	-1.342	CYBB,KRAS,PIK3R4,RRAS,RRAS2
4-1BB Signaling in T Lymphocytes	0	0.0625	#NUM!	IKBKE,TNFRSF9
CTLA4 Signaling in Cytotoxic T Lymphocytes	0	0.0449	#NUM!	CD3E,CD3G,PIK3R4,PPM1L
Induction of Apoptosis by HIV1	0	0.0656	-1	BCL2,BCL2L1,IKBKE,TP53
B Cell Activating Factor Signaling	0	0.0488	#NUM!	IKBKE,TNFSF13B
IL-15 Production	0	0.0413	#NUM!	CLK3,FER,ITK,KDR,SRC
IL-9 Signaling	0	0.0303	#NUM!	PIK3R4
CCR3 Signaling in Eosinophils	0	0.0484	-0.447	CFL2,KRAS,PIK3R4,PLA2G4A,RRAS,RRAS2
Mechanisms of Viral Exit from Host Cells	0	0.0488	#NUM!	SH3GL1,VPS28
Angiopoietin Signaling	0	0.0667	0	IKBKE,KRAS,PIK3R4,RRAS,RRAS2
Cellular Effects of Sildenafil (Viagra)	0	0.0382	#NUM!	CACNA1A,CACNA1D,PDE1B,PDE2A,PDE4B
Neuropathic Pain Signaling In Dorsal Horn Neurons	0	0.0198	#NUM!	PIK3R4,SRC
Endothelin-1 Signaling	0	0.0585	0.302	EDN1,HMOX1,KRAS,MYC,NOS2,PIK3R4,PLA2G4A,PTGER2,RRAS,RRAS2,SRC
Relaxin Signaling	0	0.0667	-1	MMP9,NOS2,NT5C,PDE1B,PDE2A,PDE4B,PDE7B,PIK3R4,SMPDL3B,VEGFA
Factors Promoting Cardiogenesis in Vertebrates	0	0.0538	#NUM!	BMPR1A,LRP5,MEF2C,SMO,TGFBR1
Renin-Angiotensin Signaling	0	0.0508	-1.342	CCL2,KRAS,PIK3R4,PTGER2,RRAS,RRAS2
Thrombin Signaling	0	0.0673	0	ARHGEF12,KRAS,PIK3R4,RHOB,RHOC,RHOF,RHOJ,RHOT2,RHOV,RND3,RRAS,RRAS2,SRC,TBP
Corticotropin Releasing Hormone Signaling	0	0.0552	0	CACNA1A,CACNA1D,CREB5,MEF2C,NOS2,NT5C,SMO,VEGFA
HGF Signaling	0	0.0631	0	CCND1,ETS1,KRAS,MAP3K9,PIK3R4,RRAS,RRAS2
GNRH Signaling	0	0.0462	-0.816	CACNA1A,CACNA1D,CREB5,KRAS,MAP3K9,RRAS,RRAS2,SRC
Human Embryonic Stem Cell Pluripotency	0	0.0667	#NUM!	BMPR1A,LEFTY1,PDGFB,PDGFC,PIK3R4,S1PR1,SMAD3,SMO,TGFBR1
RAN Signaling	0	0.0588	#NUM!	IPO5
DNA Methylation and Transcriptional Repression Signaling	0	0.0294	#NUM!	H4C4
Androgen Signaling	0	0.0662	-1.342	CACNA1A,CACNA1D,CCND1,GTF2H3,GTF2H4,POLR2H,SMAD3,SRC,TBP
Role of Oct4 in Mammalian Embryonic Stem Cell Pluripotency	0	0.0652	#NUM!	PCGF6,SPP1,TP53
Role of NANOG in Mammalian Embryonic Stem Cell Pluripotency	0	0.0588	-1.342	BMPR1A,KRAS,PIK3R4,RRAS,RRAS2,SMO,TP53
CREB Signaling in Neurons	0	0.0435	-1.342	CACNA1A,CACNA1D,CREB5,KRAS,PIK3R4,POLR2H,RRAS,RRAS2,TBP
Basal Cell Carcinoma Signaling	0	0.0278	#NUM!	SMO,TP53
Allograft Rejection Signaling	0	0.0465	#NUM!	H2-M2,HLA-DMA,HLA-DQB1,HLA-DRB5
Autoimmune Thyroid Disease Signaling	0	0.0612	#NUM!	HLA-DMA,HLA-DQB1,HLA-DRB5
Type II Diabetes Mellitus Signaling	0	0.0634	#NUM!	ACSL1,ACSL3,CACNA1A,CACNA1D,IKBKE,PIK3R4,SMPD1,SOCS1,SOCS4
Gα12/13 Signaling	0	0.0538	-1.134	IKBKE,KRAS,MEF2C,PIK3R4,RRAS,RRAS2,SRC
p70S6K Signaling	0	0.0465	-1.633	KRAS,PIK3R4,PPM1L,RRAS,RRAS2,SRC
G Beta Gamma Signaling	0	0.0574	-1.134	CACNA1A,CACNA1D,CAV1,KRAS,RRAS,RRAS2,SRC
Crosstalk between Dendritic Cells and Natural Killer Cells	0	0.0674	-0.816	CD69,HLA-DRB5,IL12B,IL18,IL3RA,LTB
Cdc42 Signaling	0	0.0659	0.816	CD3E,CD3G,CDC42BPA,CFL2,H2-M2,HLA-DMA,HLA-DQB1,HLA-DRB5,ITK,PARD6A,SRC
FAK Signaling	0	0.0526	#NUM!	KRAS,PIK3R4,RRAS,RRAS2,SRC
April Mediated Signaling	0	0.0513	#NUM!	IKBKE,TNFSF13
Retinoic acid Mediated Apoptosis Signaling	0	0.0333	#NUM!	PARP11,PARP3
AMPK Signaling	0	0.0613	-1.508	AK1,CCND1,CREB5,FASN,PCK2,PFKP,PIK3R4,PPM1E,PPM1L,RAB11A,RAB39A,RPTOR,SRC
Protein Kinase A Signaling	0	0.0528	-0.447	CREB5,DUSP16,DUSP5,DUSP9,EPM2A,FLNB,PDE1B,PDE2A,PDE4B,PDE7B,PGP,PPP1R14B,PPP1R3D,PTPN7,PTPRM,PYGM,SMAD3,SMO,SMPDL3B,TGFBR1,TIMM50
Leptin Signaling in Obesity	0	0.027	#NUM!	NPY,PIK3R4
Role of NFAT in Cardiac Hypertrophy	0	0.0654	-0.302	CACNA1A,CACNA1D,HDAC10,HDAC6,HDAC9,IGF1,KRAS,MEF2C,PIK3R4,RCAN1,RRAS,RRAS2,SRC,TGFBR1
IL-1 Signaling	0	0.022	#NUM!	IKBKE,IL1A
RANK Signaling in Osteoclasts	0	0.0455	-1	IKBKE,MAP3K9,PIK3R4,SRC
Neuroprotective Role of THOP1 in Alzheimer's Disease	0	0.0345	0	C1R,CTRL,MMP9,PRTN3
Role of Wnt/GSK-3β Signaling in the Pathogenesis of Influenza	0	0.0385	#NUM!	CSNK1E,SIAH1,SMO
TNFR1 Signaling	0	0.04	#NUM!	IKBKE,MAP4K2
TNFR2 Signaling	0	0.0333	#NUM!	IKBKE
Role of PI3K/AKT Signaling in the Pathogenesis of Influenza	0	0.0156	#NUM!	PIK3R4
PI3K Signaling in B Lymphocytes	0	0.058	0.378	ATF5,BLNK,CD81,FCGR2B,IKBKE,KRAS,RRAS,RRAS2
MIF-mediated Glucocorticoid Regulation	0	0.0294	#NUM!	PLA2G4A
P2Y Purigenic Receptor Signaling Pathway	0	0.063	-1.134	CREB5,ITGB3,KRAS,MYC,P2RY12,PIK3R4,RRAS,RRAS2
Tumoricidal Function of Hepatic Natural Killer Cells	0	0.0417	#NUM!	AIFM1
Intrinsic Prothrombin Activation Pathway	0	0.0238	#NUM!	PROS1
IL-17A Signaling in Airway Cells	0	0.0469	#NUM!	CXCL3,IKBKE,PIK3R4
Role of JAK1, JAK2 and TYK2 in Interferon Signaling	0	0.0417	#NUM!	SOCS1
Role of JAK2 in Hormone-like Cytokine Signaling	0	0.0588	#NUM!	SOCS1,SOCS4
Role of JAK family kinases in IL-6-type Cytokine Signaling	0	0.04	#NUM!	SOCS1
Dopamine-DARPP32 Feedback in cAMP Signaling	0	0.0552	-0.378	CACNA1A,CACNA1D,CREB5,CSNK1E,KCNJ10,KCNJ2,PPM1L,PPP1R14B,PPP1R3D
Gap Junction Signaling	0	0.0556	#NUM!	CAV1,CSNK1E,KRAS,NT5C,PIK3R4,RRAS,RRAS2,SRC,TJP1,TJP2,TUBG1
Transcriptional Regulatory Network in Embryonic Stem Cells	0	0.0185	#NUM!	H4C4
eNOS Signaling	0	0.044	-0.816	CAV1,HSPA1A/HSPA1B,KDR,NOSTRIN,PDGFC,PIK3R4,VEGFA
iNOS Signaling	0	0.0444	#NUM!	IKBKE,NOS2
Ephrin A Signaling	0	0.0426	#NUM!	CFL2,PIK3R4
Ephrin B Signaling	0	0.0278	#NUM!	CFL2,NCK2
ErbB Signaling	0	0.0638	-0.816	KRAS,NCK2,PIK3R4,RRAS,RRAS2,TGFA
ErbB4 Signaling	0	0.0597	-1	KRAS,PIK3R4,RRAS,RRAS2
GDNF Family Ligand-Receptor Interactions	0	0.0526	-1	KRAS,PIK3R4,RRAS,RRAS2
Netrin Signaling	0	0.0462	#NUM!	CACNA1A,CACNA1D,NCK2
Retinoate Biosynthesis I	0	0.0606	#NUM!	RDH12,RDH14
Thyroid Hormone Metabolism II (via Conjugation and/or Degradation)	0	0.0526	#NUM!	UGT1A4,UGT1A6
Nicotine Degradation III	0	0.0357	#NUM!	UGT1A4,UGT1A6
Dopamine Degradation	0	0.0667	#NUM!	ALDH1B1,IL4I1
Androgen Biosynthesis	0	0.0667	#NUM!	EBP
Melatonin Degradation I	0	0.0333	#NUM!	UGT1A4,UGT1A6
Pyridoxal 5'-phosphate Salvage Pathway	0	0.0308	#NUM!	CDK18,MAP3K9
Triacylglycerol Degradation	0	0.0638	#NUM!	ABHD12,LPL,MGLL
D-myo-inositol (1,4,5)-Trisphosphate Biosynthesis	0	0.04	#NUM!	PIP4K2C
Phospholipases	0	0.0317	#NUM!	HMOX1,PLA2G4A
Choline Biosynthesis III	0	0.0667	#NUM!	HMOX1
Estrogen Biosynthesis	0	0.0244	#NUM!	HSD17B10
1D-myo-inositol Hexakisphosphate Biosynthesis II (Mammalian)	0	0.0556	#NUM!	INPP5J
Nicotine Degradation II	0	0.0308	#NUM!	UGT1A4,UGT1A6
Serotonin Degradation	0	0.0597	-1	ALDH1B1,IL4I1,UGT1A4,UGT1A6
TCA Cycle II (Eukaryotic)	0	0.0417	#NUM!	MDH1
Salvage Pathways of Pyrimidine Ribonucleotides	0	0.0412	2	AK1,CDK18,MAP3K9,NME7
Methylglyoxal Degradation III	0	0.0556	#NUM!	AKR7A2
Superpathway of Melatonin Degradation	0	0.0462	#NUM!	IL4I1,UGT1A4,UGT1A6
Histidine Degradation VI	0	0.0667	#NUM!	MICAL2
Noradrenaline and Adrenaline Degradation	0	0.0571	#NUM!	ALDH1B1,IL4I1
Fatty Acid α-oxidation	0	0.05	#NUM!	ALDH1B1
Antioxidant Action of Vitamin C	0	0.0367	#NUM!	HMOX1,IKBKE,PLA2G4A,SLC2A3
Epithelial Adherens Junction Signaling	0	0.0658	#NUM!	EPN2,FER,KRAS,PTPRM,RRAS,RRAS2,SRC,SSX2IP,TGFBR1,TUBG1
Gαs Signaling	0	0.0467	-1.342	ADORA2B,CREB5,HCAR2,PTGER2,SRC
Remodeling of Epithelial Adherens Junctions	0	0.0294	#NUM!	SRC,TUBG1
Regulation of the Epithelial-Mesenchymal Transition Pathway	0	0.0625	#NUM!	ETS1,FGF13,KRAS,LOX,MMP9,PARD6A,PIK3R4,RRAS,RRAS2,SMAD3,SMO,TGFBR1
Sperm Motility	0	0.0448	1	CLK3,FER,ITK,KDR,PDE1B,PDE2A,PDE4B,PLA2G4A,SLC12A2,SRC
UVB-Induced MAPK Signaling	0	0.0385	#NUM!	PIK3R4,TP53
Vitamin-C Transport	0	0.0625	#NUM!	SLC2A3
Oxidative Phosphorylation	0	0.0459	1.342	COX11,NDUFA7,NDUFA9,NDUFB4,NDUFB7
PCP pathway	0	0.0333	#NUM!	PFN2,SMO
Wnt/Ca+ pathway	0	0.0323	#NUM!	CREB5,SMO
EGF Signaling	0	0.0364	#NUM!	PIK3R4,SRC
Amyloid Processing	0	0.04	#NUM!	CDK5R1,CSNK1E
FGF Signaling	0	0.0357	#NUM!	CREB5,FGF13,PIK3R4
GABA Receptor Signaling	0	0.0211	#NUM!	CACNA1A,CACNA1D
Serotonin Receptor Signaling	0	0.0465	#NUM!	IL4I1,PTS
Phototransduction Pathway	0	0.0189	#NUM!	GUCA1A
Sonic Hedgehog Signaling	0	0.0345	#NUM!	SMO
Death Receptor Signaling	0	0.0549	-2.236	BCL2,IKBKE,PARP11,PARP3,TNFSF12
Dopamine Receptor Signaling	0	0.0649	#NUM!	IL4I1,PPM1L,PPP1R14B,PPP1R3D,PTS
GPCR-Mediated Nutrient Sensing in Enteroendocrine Cells	0	0.0268	#NUM!	CACNA1A,CACNA1D,FFAR2
Gustation Pathway	0	0.0519	#NUM!	CACNA1A,CACNA1D,P2RY12,PDE1B,PDE2A,PDE4B,PDE7B,SMPDL3B
Inflammasome pathway	0	0.05	#NUM!	IL18
GP6 Signaling Pathway	0	0.0252	#NUM!	ITGB3,PIK3R4,RASGRP2
Neuroinflammation Signaling Pathway	0	0.0667	-0.447	BCL2,CCL2,CD200,CREB5,CX3CR1,CYBB,HLA-DMA,HLA-DQB1,HLA-DRB5,HMOX1,IKBKE,IL12B,IL18,MMP9,NOS2,PIK3R4,PLA2G4A,TGFBR1,TICAM1,TLR5
Opioid Signaling Pathway	0	0.0607	-0.775	CACNA1A,CACNA1D,CREB5,KRAS,MYC,PDE1B,PENK,RGS1,RGS10,RGS11,RGS18,RPS6KA2,RRAS,RRAS2,SRC
Adrenomedullin signaling pathway	0	0.0558	-0.632	BCL2,CFH,CRCP,IL18,IL1A,IL36G,KRAS,NT5C,PIK3R4,RRAS,RRAS2
Th17 Activation Pathway	0	0.044	0	AHR,BATF,IL12B,PTGER2
SPINK1 Pancreatic Cancer Pathway	0	0.05	#NUM!	CTRL,SMAD3,TGFBR1
Endocannabinoid Neuronal Synapse Pathway	0	0.0391	0	CACNA1A,CACNA1D,CNR2,DAGLA,MGLL
Apelin Pancreas Signaling Pathway	0	0.0227	#NUM!	PIK3R4
Apelin Liver Signaling Pathway	0	0.0385	#NUM!	EDN1
Apelin Cardiac Fibroblast Signaling Pathway	0	0.0435	#NUM!	SERPINE1
Apelin Adipocyte Signaling Pathway	0	0.061	-0.447	CYBB,GSTM1,GSTP1,MGST2,MGST3
Apelin Cardiomyocyte Signaling Pathway	0	0.0101	#NUM!	PIK3R4
PFKFB4 Signaling Pathway	0	0.0435	#NUM!	CREB5,TP53
Synaptogenesis Signaling Pathway	0	0.0449	0	BET1L,CADM1,COMP,CREB5,FARP1,KRAS,LRP8,NAPA,PIK3R4,RASGRP2,RRAS,RRAS2,SRC,THBS1
IL-23 Signaling Pathway	0	0.0455	#NUM!	IL12B,PIK3R4
White Adipose Tissue Browning Pathway	0	0.0543	-0.378	CACNA1A,CACNA1D,CAMP,CREB5,KDR,LDHB,VEGFA
Calcium Signaling	0	0.0534	0	ASPH,CACNA1A,CACNA1D,CREB5,HDAC10,HDAC6,HDAC9,MCU,MEF2C,RCAN1,TNNT3
Ephrin Receptor Signaling	0	0.0556	-1.134	CFL2,CREB5,KRAS,NCK2,PDGFB,PDGFC,RRAS,RRAS2,SRC,VEGFA
