# Supplementary material for: Microglial Nox2 Plays a Key Role in the Pathogenesis of Experimental Autoimmune Encephalomyelitis
Source: Front Immunol. 2021 Apr 2;12:638381. doi: 10.3389/fimmu.2021.638381 (PMC8050344; doi:10.3389/fimmu.2021.638381)
Supplement: Supplementary file 6 [file Table_5.xlsx]

## Sheet: W-MOG10_ Enrichment
NAME	Description
LIT_MM_JEHL_IFNGAMMA_S-FLEXNERI-INFECTION_UP	up-genes regulated by IFN? during S. flexneri infection. (Table S1; Pubmed:22912573)
LIT_MM_SINGH_BMM-IPA_IFN-GAMMA_UP	IFN-gamma induced_List of genes suppressed or rescued by exosomes isolated from M.tb(Mycobacterium tuberculosis) infected cells following stimulation with IFN-? (Table S1; Pubmed:21533172)
LIT_MM_ALY_LUNG_IFNGAMMA-IRF1_MOCK_C1_DIFF	cluster1_IFN-?- and IRF-1-dependent gene expression according to k-means clusters shown in Fig. 7 (Table S2; Pubmed:18705699)
LIT_MM_HAABETH_TUMORICIDAL-MACROPHAGE_UP	Genes that are upregulated in tumoricidal macrophages (Data Supplement 1; Pubmed:21407206)
LIT_MM_KIM_PAM3-PRETREATED_MDP_UP	MDP-induced genes (Pam3-pretreated macrophages) (Table S4; Pubmed:18261938)
LIT_MM_LACAZE_IFNB_IFN-RISCFREE_IFN_RNAI_DN	DN IfnB_IFN- vs. Riscfree_IFN-,RNAi gene expression clusters (Addi. file 8; Pubmed:19664281)
LIT_MM_CHEN_RPE_CHOROID_OLG_YOUNG_UP	UP_Genes that are differentially expressed with age in the RPE/choroid (Table S1; Pubmed:18523633)
LIT_MM_SAYI_IFN-GAMMA_DIFF	286 genes that are correlated with and induced by IFN-? (Table S2; Pubmed:?9454706)
LIT_MM_SINGH_BMM-IPA_RVX-IFN_IFN_DN	suppressed by Rv exosomes(RVX) _IFN-? stimulated pathways significantly inhibited by Rv exosomes. (Table S2; Pubmed:21533172)
LIT_MM_LACAZE_STAT1_IFN-RISCFREE_IFN_RNAI_DN	DN Stat1_IFN- vs. Riscfree_IFN-,RNAi gene expression clusters (Addi. file 8; Pubmed:19664281)
GO_BP_MM_IMMUNE_RESPONSE	GO:0006955 ; GO Term Name: immune response ; GO domain: biological_process ; GO Evidence Code: IEA
LIT_MM_LACAZE_NFKB2_IFN-RISCFREE_IFN_RNAI_DN	DN Nfkb2_IFN- vs. Riscfree_IFN-,RNAi gene expression clusters (Addi. file 8; Pubmed:19664281)
LIT_MM_LACAZE_TRAF1_IFN-RISCFREE_IFN_RNAI_UP	UP Traf1_IFN- vs. Riscfree_IFN-,RNAi gene expression clusters (Addi. file 8; Pubmed:19664281)
LIT_MM_LACAZE_STAT2_IFN-RISCFREE_IFN_RNAI_DN	DN Stat2_IFN- vs. Riscfree_IFN-,RNAi gene expression clusters (Addi. file 8; Pubmed:19664281)
LIT_MM_LACAZE_IRF3_IFN-RISCFREE_IFN_RNAI_DN	DN Irf3_IFN- vs. Riscfree_IFN-,RNAi gene expression clusters (Addi. file 8; Pubmed:19664281)
LIT_MM_LACAZE_IFI47_IFN-RISCFREE_IFN_RNAI_UP	UP Ifi47_IFN- vs. Riscfree_IFN-,RNAi gene expression clusters (Addi. file 8; Pubmed:19664281)
LIT_MM_CHESSLER_BRAZIL-STRAIN_MOCK_SKIN_UP	Infection with different strains of T. cruzi results in the differences in the transcriptional response at the site of infection.A,Brazil strain/mock (Table SIIIA; Pubmed:19201883)
LIT_MM_LACAZE_IRF5_IFN_VS_RISCFREE_IFN_RNAI_DN	DN Irf5_IFN+ vs. Riscfree_IFN+,RNAi gene expression clusters (Addi. file 8; Pubmed:19664281)
LIT_MM_HYLAND_STREPTOCOCCUS_INTRANASAL-INFECTION_SHAM-INFECTED-NALT_24H_DIFF	List of 261 genes which were significantly increased or decreased in expression by Streptococcus pyogenes strain 90-226 or 90-226M1? , in pairwise comparisons to sham-infected NALT at 24 h after intranasal infection. (Table S1; Pubmed:19243434)
LIT_MM_LACAZE_IFNB_IFN_VS_RISCFREE_IFN_RNAI_DN	DN IfnB_IFN+ vs. Riscfree_IFN+,RNAi gene expression clusters (Addi. file 8; Pubmed:19664281)
LIT_MM_KIM_MDP-PRETREATED_PAM3_UP	Pam3-induced genes (MDP-pretreated macrophages) (Table S3; Pubmed:18261938)
LIT_MM_LACAZE_STAT1_IFN_VS_RISCFREE_IFN_RNAI_DN	DN Stat1_IFN+ vs. Riscfree_IFN+,RNAi gene expression clusters (Addi. file 8; Pubmed:19664281)
GENESIGDB_MM_CARMODY_02_IMMUNE_2	Mouse Immune_Carmody02_151genes; 12446012-Table2; data from GeneSigDB: http://compbio.dfci.harvard.edu/genesigdb/download/ALL_SIGSv4.gmt.
LIT_MM_LACAZE_IRF5_IFN-RISCFREE_IFN_RNAI_UP	UP Irf5_IFN- vs. Riscfree_IFN-,RNAi gene expression clusters (Addi. file 8; Pubmed:19664281)
LIT_MM_LACAZE_STAT2_IFN_VS_RISCFREE_IFN_RNAI_DN	DN Stat2_IFN+ vs. Riscfree_IFN+,RNAi gene expression clusters (Addi. file 8; Pubmed:19664281)
LIT_MM_CHESSLER_Y-STRAIN_MOCK_SKIN_UP	Y stain T. cruzi infection results in the upregulation of the 381 genes in the site of infection. Y strain infected skin /mock infected skin (Table SI; Pubmed:19201883)
LIT_MM_WILHELM_FLA2_VS_FLB1_RNA-SEQ-RESULT_DN	down-regulated in FLA2/FLB1-RNA-seq results (Table S1; Pubmed:20980679)
LIT_MM_RANDALL_ECM_B6_CBA-BRAIN_UP	up-regulated expression at ECM in both B6 and CBA brain tissue. (Table S1; Pubmed:18474652)
LIT_MM_LACAZE_LYN_IFN-RISCFREE_IFN_RNAI_UP	UP Lyn_IFN- vs. Riscfree_IFN-,RNAi gene expression clusters (Addi. file 8; Pubmed:19664281)
LIT_MM_CALDERON_ISLET_UNPURIFIED-BETA-CELL_PURIFIED-BETA-CELL_LEUKOCYTE-DEPLETED_DIFF	Leukocyte-depleted gene changes (Table S2; Pubmed:21220309)
LIT_MM_ZHANG_GLV-1H68_3-6W_UP	red_Host gene expression profiling analysis (Table S1-mouse chip; Pubmed:17942938)
LIT_MM_LACAZE_NFKB2_IFN_VS_RISCFREE_IFN_RNAI_DN	DN Nfkb2_IFN+ vs. Riscfree_IFN+,RNAi gene expression clusters (Addi. file 8; Pubmed:19664281)
LIT_MM_PESCE_PBS_VS_CPG_3H-4D_DIFF	Complete list of CpG specific responsive genes selected by having a p-value <=0.05 and a log2 fold change >=|2| and identified by SAM comparing PBS and CpG between 3 hours and 4 days. Data are expressed as the average log2 fold change of three repeats in each time point. (Table S1; Pubmed:20375632)
LIT_MM_ROGERS_FEMININE_TUMORIGENIC-HEPATITIS_UP	up-Feminine genes upregulated in tumorigenic hepatitis (Table S3; Pubmed:18089782)
LIT_MM_MIU_PBK_14D_AFFYMETRIX-ARRAY_UP	Upregulated Genes (>2.0 fold, Affymetrix arrays) During PbA Infection (6 days p.i.) (Table S3; Pubmed:18299338)
LIT_MM_SPEHLMANN_C.RODENTIUM-INFECTION_UNINFECTION_COLONIC_UP	Increased colonic gene expression in response to C. rodentium infection (Table SII; Pubmed:19675161)
LIT_MM_LACAZE_IRF3_IFN_VS_RISCFREE_IFN_RNAI_DN	DN Irf3_IFN+ vs. Riscfree_IFN+,RNAi gene expression clusters (Addi. file 8; Pubmed:19664281)
LIT_MM_KIM_PAM3_UP	Pam3-induced genes and self/cross tolerance (Table S2; Pubmed:18261938)
LIT_MM_WEBER_TCF1-THY1-CD25_VS_LMPP_UP	UP_Genes greater than 2 fold in Tcf1-expressing Thy1+CD25+ cells compared to LMPP (Table S3; Pubmed:21814277)
LIT_MM_CRANDALL_IMMUNE_LYME-ARTHRITIS_DIFF	Expression levels of genes involved in the immune response that are changed 2-fold (Table 4; Pubmed:17114465)
LIT_MM_GHISLETTI_PRIMARY-MACROPHAGE_LPS-XLS-595KB_UP	Induced-Cumulative Microarray Data for Genes Induced in Primary Macrophages More Than 3-Fold by LPS (XLS 595 kb) (Table S1; Pubmed:17218271)
LIT_MM_MIU_PBK_6D_AFFYMETRIX-ARRAY_UP	Upregulated Genes (>2.0 fold, Affymetrix arrays) During PbK Infection (6 days p.i.) (Table S3; Pubmed:18299338)
LIT_MM_MIU_PBA_6D_AFFYMETRIX-ARRAY_UP	Upregulated Genes (>2.0 fold, Affymetrix arrays) During PbA Infection (6 days p.i.) (Table S3; Pubmed:18299338)
LIT_MM_LEBER_MDP_L-MONOCYTOGENE-GENOMIC-DNA_CYTOSOLIC-RESPONSE_DIFF	Induction of the Cytosolic Response by Cytosolic Delivery of L. monocytogenes Genomic DNA Is Amplified by Co-Delivery of MDP (Dataset S4; Pubmed:18193943)
LIT_MM_ZACHARIAS_SHH_ISOLATED-MESENCHYME_DN	DN Shh Regulated Genes in Isolated Mesenchyme (Table S1; Pubmed:20206176)
LIT_MM_ROUX_B-ABORTUS-2308_DIFF	Genes differentially expressed in mice infected with B. abortus 2308. (Table 3; Pubmed:17441987)
LIT_MM_SHELL_LPS-STIMULATED-RAW-MACROPHAGE_UP	Genes that increased expression in LPS-stimulated RAW macrophages (Table S1; Pubmed:16207706)
LIT_MM_BISAILLON_HOXA9-PKNOX1?MC_DN	Genes downregulated by at least two-fold compared to the parental Hoxa9 population--Hoxa9 + Pknox1?MC (Table S3; Pubmed:21900201)
LIT_MM_CHIN_B-PSEUDOMALLEI-INFECTION_LIVER-SPLEEN_DIFF	Kinetic profiles of host genes expression modulated by B. pseudomallei infection in both liver and spleen. (Table S1; Pubmed:21110886)
LIT_MM_LACAZE_CASP4_IFN_VS_RISCFREE_IFN_RNAI_DN	DN Casp4_IFN+ vs. Riscfree_IFN+,RNAi gene expression clusters (Addi. file 8; Pubmed:19664281)
LIT_MM_LOTZER_TNF-ALPHA-LTBETAR-24H_SMCS_DIFF	c. TNF + ?-LT?R stimulates 177 genes at 24h,SMC mRNAs stimulated by TNF, a-LT筶, and by TNF plus a-LT筶 at 24h reveals extent of transcription crosstalk (Table SII.c; Pubmed:20139367)
LIT_MM_BISAILLON_HOXA9-MEIS1_DN	Genes downregulated by at least two-fold compared to the parental Hoxa9 population--Hoxa9 + Meis1 (Table S3; Pubmed:21900201)
LIT_MM_LACAZE_CASP4_IFN-RISCFREE_IFN_RNAI_UP	UP Casp4_IFN- vs. Riscfree_IFN-,RNAi gene expression clusters (Addi. file 8; Pubmed:19664281)
LIT_MM_ROUX_B-ABORTUS-2308_VIRB-BA41_DIFF	Genes differentially expressed in response to infection with B. abortus 2308 compared to virB (BA41)-infected mice (Table S3; Pubmed:17441987)
LIT_MM_MOSCA_MF59_MUSCLE_DIFF	adjuvants MF59 oil-in-water emulsionin the mouse muscle (Table S1; Pubmed:18650390)
LIT_MM_MATTEOLI_SUBLETHAL-PYV_VS_LETHAL-YOPH_CB1_DIFF	cluster-B1_Comparison of sublethal pYV? infection versus lethal ?yopH infection (Additional file 2; Pubmed:18803824)
LIT_MM_AIDINIS_2ANIMAL-MODEL_WHOLE-JOINT_RHEUMATOID-ARTHRITIS_UP	up-WJ-Differentially Expressed Genes Common in Two Animal Models of RA from Oligonucleotide DNA Microarray Hybridizations at 95% Specificity SF: Synovial Fibroblasts, WJ: Whole joints, Up: upregulated genes, Down: Downregulated genes. FC: Fold Change, p?0.05 (Table S2; Pubmed:16254600)
LIT_MM_WILHELM_FLA2_VS_FLB1_MICROARRAY-RESULT_DN	down-regulated in FLA2/FLB1-Microarray results (Table S1; Pubmed:20980679)
LIT_MM_LOTZER_TNF-ALPHA-LTBETAR-24H_SMCS-ONLY_DIFF	b. Gene induction only in aorta SMCs,Endothelial cells and SMCs were cultured as described in Methods and both cell types were stimulated with a combination of TNF/?-LT?R for 24 h (Table SIV.b; Pubmed:20139367)
LIT_MM_YAMAMOTO_LPS_TRIB1-DEFICIENT-CELL_SIMILAR_DIFF	similarly_gene expression analysis in Trib1-deficient macrophages (Table S1; Pubmed:17724128)
LIT_MM_LACAZE_SOD2_IFN-RISCFREE_IFN_RNAI_UP	UP SOD2_IFN- vs. Riscfree_IFN-,RNAi gene expression clusters (Addi. file 8; Pubmed:19664281)
LIT_MM_MIU_PBA_6D_OLIGONUCLEOTIDE-ARRAY_UP	Upregulated Genes (>2.0 fold, oligonucleotide arrays) During PbA Infection (6 days p.i.) (Table S1; Pubmed:18299338)
LIT_MM_LOVEGROVE_PBA-INFECTION_C57BL_6_VS_BALB_C_DIFF	Differentially expressed genes during the time course of PbA infection (Table S2; Pubmed:17991715)
LIT_MM_MATSUI_ALLOGRAFT_VS_ISOGRAFT_7D_UP	Expression profile of the 64 genes induced more in the tolerizing allograft than in the syngeneic isograft on day 7 (Table S1; Pubmed:12966135)
GENESIGDB_MM_PARK_07_BREAST	Mouse Breast_Park07_173genes; 17206280-TableS1C; data from GeneSigDB: http://compbio.dfci.harvard.edu/genesigdb/download/ALL_SIGSv4.gmt.
SIDER_MM_DISCOMFORT	Discomfort from SIDER (SIDe Effect Resource), data from GeneSetDB.
LIT_MM_LACAZE_CT2A_IFN_VS_RISCFREE_IFN_RNAI_UP	UP CT2a_IFN+ vs. Riscfree_IFN+,RNAi gene expression clusters (Addi. file 8; Pubmed:19664281)
LIT_MM_LEBER_MYD88MACROPHAGE_LM-HLY-LM_DIFF	transcriptional responses in WT and myd88-/- macrophages during infection with either WT or hly L.monocytogenes, at the indicated times post-infection (in minutes) (Dataset S5; Pubmed:18193943)
LIT_MM_CHEN_DELETION-OF-FOXA2_ASTHMA_DIFF	Asthma associated genes influenced by deletion of Foxa2 (Table SI; Pubmed:20483781)
LIT_MM_ZHANG_TRYPANOSOMA-SPECIES_UP	UP List of genes up- or down-regulated by Trypanosoma species (Dataset S3; Pubmed:20361029)
LIT_MM_TACHDJIAN_DOXYCYCLINE-TREATED_R576IL13TG_R576_UP	UP Differential gene expression in doxycycline-treated B6.129Il4raR576/R576/IL-13tg (R576IL13tg) versus B6.129Il4raR576/R576 (R576) mice (Table S2; Pubmed:19770271)
LIT_MM_KOO_MTB-INFECT_LUNG_CC-3052_28D_DN	Differentially expressed mouse genes by CC-3052 treatment (Table S1; Pubmed:21364878)
LIT_MM_LACAZE_CT2A_IFN-RISCFREE_IFN_RNAI_UP	UP CT2a_IFN- vs. Riscfree_IFN-,RNAi gene expression clusters (Addi. file 8; Pubmed:19664281)
LIT_MM_LANG_SOCS3_VS_MACROPHAGES_400TREATMENT_IL-6_UP	up-GENES UP-REGULATED IN SOCS3-/- MACROPHAGES AFTER 400?TREATMENT IL-6 (Table S1; Pubmed:12754506)
LIT_MM_KWON_IL-21_CANDIDATE-REGULATING-STAT3-BINDING-SITE_CD4-T-CELL_DN	Genes Differentially Expressed upon IL-21 Treatment and with a Candidate Regulating STAT3-Binding Site Downstream of the Gene (Table S7; Pubmed:20064451)
LIT_MM_KAHNERT_M-TUBERCULOSIS_IL-4-IFN-C-ACTIVATED-MACROPHAGE_UP	induced by M. tuberculosis in IL-4- and IFN-c-activated macrophages (Table 2; Pubmed:16479545)
LIT_MM_FOSTER_LPS_CLASS-NT_DIFF	b) Class NT genes (Table S1; Pubmed:17538624)
MPO_MM_ABNORMAL_IMMUNE_SYSTEM_PHYSIOLOGY	abnormal immune system physiology from MPO (Mammalian Phenotype Ontology), data from GeneSetDB.
LIT_MM_DOLKEN_IFNALPHA_MOCK_IFNGAMMA_MOCK_DIFF	List of interferon-regulated genes (Table S1; Pubmed:18658122)
LIT_MM_LACAZE_IFNGAMMA_DIFF	Genes differentially regulated by IFN? (242 genes) (Addi. file 4; Pubmed:19664281)
LIT_MM_ALY_LUNG_IFNGAMMA-IRF1_MOCK_C2_DIFF	cluster2_IFN-?- and IRF-1-dependent gene expression according to k-means clusters shown in Fig. 7 (Table S2; Pubmed:18705699)
LIT_MM_MOSCA_MF59_CPG_ALUM_MUSCLE_DIFF	the core response genes of microarray selected hits having a p-value <=0.05 and a log2 fold change >=|2|. Data are expressed as the average log2 fold change of three repeats in each time point. --adjuvants MF59 oil-in-water emulsion, CpG, and alum in the mouse muscle (Table S2; Pubmed:18650390)
LIT_MM_REDDY_LUPUS-NEPHRITIS_ASYMPTOMATIC_SIROLIMUS_ASYMPTOMATIC_NON-IMMUNOGLOBULIN_DIFF	An excel file containing the FDR p values and fold change metrics for genes associated with lupus nephritis and the effect of sirolimus treatment (Additional file 3; Pubmed:18980674)
LIT_MM_MOSCA_MF59_CPG_MUSCLE_DIFF	adjuvants MF59 and CpG in the mouse muscle (Table S1; Pubmed:18650390)
LIT_MM_GEBEL_CS-EXPOSURE-MED_KO-5M_UP	UP ko, med,expression data from Nrf 2 -/- and wt mice exposed for 5 months to all three doses (low, medium, and high, see above) were analyzed,RNA samples prepared from lungs of sham-exposed nrf 2 ko and wt mice or mice exposed to CS (1500 lg [low], 2250 lg [medium], or 3000 lg[high] TPM/l per day, 5 days/week) for 5 months were analyzed (Table S2; Pubmed:20133372)
LIT_MM_FOSTER_LPS_CLASS-T_DIFF	a) Class T genes (Table S1; Pubmed:17538624)
STITCH_MM_ADENOSINE-CID100000191	adenosine(CID100000191) from STITCH (Search Tool for Interactions of Chemicals), data from GeneSetDB.
LIT_MM_LACAZE_SIRNAS-WITHOUT-IFNGAMMA_DIFF	Genes differentially regulated by targeting siRNAs in absence of IFN? (986 genes) (Addi. file 5; Pubmed:19664281)
LIT_MM_GEBEL_CS-EXPOSURE-LOW_KO-5M_UP	UP ko, low,expression data from Nrf 2 -/- and wt mice exposed for 5 months to all three doses (low, medium, and high, see above) were analyzed,RNA samples prepared from lungs of sham-exposed nrf 2 ko and wt mice or mice exposed to CS (1500 lg [low], 2250 lg [medium], or 3000 lg[high] TPM/l per day, 5 days/week) for 5 months were analyzed (Table S2; Pubmed:20133372)
LIT_MM_ARENSBERGEN_NON-CPG-ISLAND_H3K27ME3_FACS-BETA-CELL_DIFF	non-CpG island genes with H3K27me3 enrichment in FACS purified ?-cells. (Table S9; Pubmed:20395405)
LIT_MM_RAMSEY_TLR-STIMULATED_MURINE_MACROPHAGE_PREDICTED_TF_CLUSTER_DIFF	ChIP-on-chip data. Results of five ChIP-on-chip assays for predicted (TF,cluster) pairs.-underlying TLR-stimulated murine macrophage (Table S13; Pubmed:18369420)
LIT_MM_BORJABAD_HIV-1_ASTROCYTES_UP	UP Partial list of cellular significantly changed genes in mouse primary astrocytes exposed to HIV-1 (Table 2; Pubmed:19697136)
LIT_MM_GEBEL_CS-EXPOSURE-HIGH_5M_UP	UP wt, high,expression data from Nrf 2 -/- and wt mice exposed for 5 months to all three doses (low, medium, and high, see above) were analyzed,RNA samples prepared from lungs of sham-exposed nrf 2 ko and wt mice or mice exposed to CS (1500 lg [low], 2250 lg [medium], or 3000 lg[high] TPM/l per day, 5 days/week) for 5 months were analyzed (Table S2; Pubmed:20133372)
GO_CC_MM_EXTERNAL_SIDE_OF_PLASMA_MEMBRANE	GO:0009897 ; GO Term Name: external side of plasma membrane ; GO domain: cellular_component ; GO Evidence Code: ISA
LIT_MM_HAMASAKI_GAMMA-PGA-NPS_LPS_UNPARTICULATE-GAMMA-PGA_DCS_DIFF	Relative gene expression in DCs treated with ?-PGA NPs, LPS, or unparticulate ?-PGA (Table 1; Pubmed:20219877)
LIT_MM_SOMEL_HUMAN-MOUSE-ORTHOLOG_DIET_LIVER_DIFF	The 117 human-mouse orthologs showing diet-related human-chimpanzee expression differences in liver. (Table S5; Pubmed:18231591)
LIT_MM_KUNIKATA_C1_ALLERGEN_UP_EP3-AGONIST_DN	Genes which are increased by allergen and suppressed by the EP3 agonist more than 6 out of 9 pairs (195 genes, Cluster 1) (Table S1; Pubmed:15806106)
LIT_MM_COATES_MACROPHAGE_IONIZING-RADIATION_DN	down-Differentially expressed gene probe sets (p<0.05 using FDR)-Indirect Macrophage Responses to Ionizing Radiation: Implications for Genotype-Dependent Bystander Signaling (Table S1; Pubmed:18199539)
MSIGDB_MM_FOSTER_TOLERANT_MACROPHAGE_DN	Class NT (non-tolerizeable) genes: induced during the first LPS stimulation and induced at equal or greater degree in tolerant macrophages.
MPO_MM_DECREASED_CD4-POSITIVE_T_CELL_NUMBER	decreased CD4-positive T cell number from MPO (Mammalian Phenotype Ontology), data from GeneSetDB.
LIT_MM_FONTANA_CASPASE-1_5-L-PNEUMOPHILA_DIFF	Genes induced or repressed twofold or more in caspase-1-/- macrophages infected with wildtype or ?5 L. pneumophila. (Table S1; Pubmed:21390206)
LIT_MM_MORRISON_TRYPANOSOMA-BRUCEI_927-247-INFECTED_SPLEEN_UP	UP Genes common to 927-infected and 247-infected spleens at FDR<1 (Table S6; Pubmed:20086091)
L2L_MM_HSC_INTERMEDIATEPROGENITORS_FETAL	Up-regulated in mouse hematopoietic intermediate progenitors from fetal liver (Intermediate Progenitors Shared + Fetal)
GO_MF_MM_RNA_BINDING	GO:0003723 ; GO Term Name: RNA binding ; GO domain: molecular_function ; GO Evidence Code: IEA
LIT_MM_TOLGYESI_OVA_28D_LUNG_UP	UP_gene list containing transcripts which showed at least >2.0-fold statistically differential expression in group 1 relative to the common reference control (Table S3; Pubmed:19556304)
LIT_MM_TRIKHA_MX-CRE-E2F1E2F2E2F3F_F-MYELOID_UP	UP_List of genes upregulated and downregulated in Mx-cre; E2f1-/-E2f2-/-E2f3f/f myeloid cells (Table S2; Pubmed:21115501)
LIT_MM_GEBEL_CS-EXPOSURE-HIGH_KO-5M_UP	UP ko, high,expression data from Nrf 2 -/- and wt mice exposed for 5 months to all three doses (low, medium, and high, see above) were analyzed,RNA samples prepared from lungs of sham-exposed nrf 2 ko and wt mice or mice exposed to CS (1500 lg [low], 2250 lg [medium], or 3000 lg[high] TPM/l per day, 5 days/week) for 5 months were analyzed (Table S2; Pubmed:20133372)
SIDER_MM_CHEST_DISCOMFORT	Chest discomfort from SIDER (SIDe Effect Resource), data from GeneSetDB.
LIT_MM_TACHDJIAN_DOXYCYCLINE-TREATED_Q576IL13TG_Q576_DN	DN Differential gene expression in doxycycline-treated B6.Il4raQ576/Q576/IL-13tg (Q576IL13tg) versus B6.Il4raQ576/Q576 (Q576) mice (Table S1; Pubmed:19770271)
LIT_MM_GEBEL_CS-EXPOSURE-MED_5M_UP	UP wt, med,expression data from Nrf 2 -/- and wt mice exposed for 5 months to all three doses (low, medium, and high, see above) were analyzed,RNA samples prepared from lungs of sham-exposed nrf 2 ko and wt mice or mice exposed to CS (1500 lg [low], 2250 lg [medium], or 3000 lg[high] TPM/l per day, 5 days/week) for 5 months were analyzed (Table S2; Pubmed:20133372)
LIT_MM_RANDALL_CBA-BRAIN_NOT-B6_ECM_UP	up-regulated genes expressed in CBA brain tissue, but not B6 brain tissue, at ECM. (Table S3; Pubmed:18474652)
LIT_MM_ASP_MYOTUBE_H3K27ME3_MYH-LOCI_CLUSTER4_DN	cluster4_Permanently repressed genes (Dataset S1; Pubmed:21551099)
SIDER_MM_GASTROINTESTINAL_DISCOMFORT	Gastrointestinal discomfort from SIDER (SIDe Effect Resource), data from GeneSetDB.
LIT_MM_GEBEL_CS-EXPOSURE-LOW_5M_UP	UP wt, low,expression data from Nrf 2 -/- and wt mice exposed for 5 months to all three doses (low, medium, and high, see above) were analyzed,RNA samples prepared from lungs of sham-exposed nrf 2 ko and wt mice or mice exposed to CS (1500 lg [low], 2250 lg [medium], or 3000 lg[high] TPM/l per day, 5 days/week) for 5 months were analyzed (Table S2; Pubmed:20133372)
LIT_MM_PENG_JARID1A-TARGET-GENE_DIFF	List of Jarid1a target genes (Table S3; Pubmed:20064375)
STITCH_MM_CHEMOTACTIC_PEPTIDE-CID100004364	chemotactic peptide(CID100004364) from STITCH (Search Tool for Interactions of Chemicals), data from GeneSetDB.
LIT_MM_ULRICH_TMEV_VS_MOCK-INFECTED_TIME_DIFF	Official gene symbols, q-values, and relative fold changes for all 1210 probe sets differentially expressed between TMEV-infected and mock-infected mice in the time course of TME at a false discovery rate of 1.0%. (Table S1; Pubmed:19183246)
STITCH_MM_CHEMOTACTIC_PEPTIDE-CID000443295	chemotactic peptide(CID000443295) from STITCH (Search Tool for Interactions of Chemicals), data from GeneSetDB.
GENESIGDB_MM_VUILLEMENOT_04_LUNG_NOT_CANCER_1	Mouse Lung_not_cancer_Vuillemenot04_64genes; 12972399-Table1; data from GeneSigDB: http://compbio.dfci.harvard.edu/genesigdb/download/ALL_SIGSv4.gmt.
STITCH_MM_ADENOSINE-CID000060961	adenosine(CID000060961) from STITCH (Search Tool for Interactions of Chemicals), data from GeneSetDB.
LIT_MM_REDDY_NRF2_NRF2GSH_VS_NRF2_DN	Complete list of common down regulated genes in wildtype and KO-GSH cells (Table S2; Pubmed:17895394)
KEGG_MM_CYTOKINE-CYTOKINE_RECEPTOR_INTERACTION	Cytokine-cytokine receptor interaction http://www.genome.jp/kegg-bin/show_pathway?mmu04060
LIT_MM_ZACHARIAS_SHH-IHH_ISOLATED-MESENCHYME_DN	Shh and Ihh Common Downregulated Genes (Table S4; Pubmed:20206176)
KEGG_MM_RHEUMATOID_ARTHRITIS	Rheumatoid arthritis http://www.genome.jp/kegg-bin/show_pathway?mmu05323
LIT_MM_BOCHMANN_EPICARDIAL-SIGNATURE_MYOCARDIAL-INFARCTION_DIFF	Full List of epicardial signature genes.--Epicardial genes are differentially regulated after myocardial infarction (Table S4; Pubmed:20596535)
LIT_MM_FREILICH_FUNCTIONAL-INVOLVED-SIGNAL-TRANSDUCTION_DIFF	the functional assignments of the proteins used in the analysis--proteins involved in signal transduction (Table S1; Pubmed:15998445)
LIT_MM_HAMMER_KO_FC_UP	up-FC KO / FC WT (Table S1; Pubmed:16380512)
STITCH_MM_DOPAMINE-CID100000681	dopamine(CID100000681) from STITCH (Search Tool for Interactions of Chemicals), data from GeneSetDB.
LIT_MM_ZACHARIAS_IHH_ISOLATED-MESENCHYME_DN	DN Ihh Regulated Genes in Isolated Mesenchyme (Table S2; Pubmed:20206176)
LIT_MM_MOSCA_ALUM_MUSCLE_DIFF	adjuvants alum in the mouse muscle (Table S1; Pubmed:18650390)
MSIGDB_MM_FOSTER_TOLERANT_MACROPHAGE_UP	Class T (tolerizeable) genes: induced during the first LPS stimulation and either not re-induced or induced to a much lesser degree in tolerant macrophages.
LIT_MM_ZACHARIAS_TRANSITION-OF-MESENCHYME-TO-CULTURE-72H_UP	UP Genes Regulated in Cultured Mesenchyme after 72 hours in Culture (Table S7; Pubmed:20206176)
LIT_MM_HUTTON_IMMUNE_DIFF	List and annotation of 360 expressed sequences (immune genes). (Table S1; Pubmed:15504237)
LIT_MM_MOSCA_CPG_MUSCLE_DIFF	adjuvants CpG in the mouse muscle (Table S1; Pubmed:18650390)
LIT_MM_ZACHARIAS_CULTURE-DN_HH-LIGAND_UP	Genes Upregulated by Culture and Downregulated by Hh ligand (Table S12; Pubmed:20206176)
LIT_MM_SUSZTAK_STZ-TREATED_C57BL6-MICE_DIFF	differentially expressed genes identified by SAM analysis when STZ-treated C57BL6 mice compared to control mice. (Table S2; Pubmed:14988265)
LIT_MM_KLEEMANN_CHOLESTEROL-FEEDING_HC_UP	significantly up-regulated by cholesterol feeding-HC (Table S3; Pubmed:17892536)
LIT_MM_ZHU_LBP_LP_DIFF	LBP.LPS.1-2-4-8-16-48 hours (Table S2a; Pubmed:16982864)
LIT_MM_PAGE_L2-TG_K5-IKKB_SKIN_UP	UP All regulated probes (Fold Change >2, adj. P. value<0.01). Fold change is expressed as log2 ratio (logFC) of transgenic/control (Table S1; Pubmed:20200541)
LIT_MM_BISAILLON_HOXA9-PKNOX1_DN	Genes downregulated by at least two-fold compared to the parental Hoxa9 population--Hoxa9 + Pknox1 (Table S3; Pubmed:21900201)
L2L_MM_ARTHRITIS_MOUSE_HTLV1_UP	Up-regulated in joint tissue from severely arthritic 6-9 week-old HTLV-I transgenic mice, versus wild-type littermate controls.
LIT_MM_KOMASHKO_COMMONLY-EXPRESSED_HEGS_DIFF	Mouse common HEGs(highly expressed genes) (Table S5; Pubmed:18347325)
LIT_MM_BANUS_B-PERTUSSIS-INOCULATION_DIFF	induced upon B. pertussis inoculation whose expression was found to be significant at an FDR<0,05, of which 1,395 had an FR higher then 1.5 (Table S5; Pubmed:17487483)
LIT_MM_REDDY_LUPUS-NEPHRITIS_LUPUS_DIFF	Rapalog-mTOR canonical pathway and links to mouse lupus nephritis genes (fig 11) (Additional file 4; Pubmed:18980674)
STITCH_MM_SPHINGOSINE_1-PHOSPHATE-CID100005262	sphingosine 1-phosphate(CID100005262) from STITCH (Search Tool for Interactions of Chemicals), data from GeneSetDB.
LIT_MM_COPPIN_D2_B6_C4_LIVER_DN_DUODENUM_DN	cluster4_Genes differentially expressed between wild-type B6 and D2 liver and/or duodenum (Additional file 3; Pubmed:17945001)
LIT_MM_ZHU_LPS_IFN-2_MA_PGE2_ISO_DIFF	LPS IFN-2 MA PGE2 ISO -different time points (Table S3a; Pubmed:16982864)
LIT_MM_GRABNER_APOE_AORTA_32W_6W_ATHEROSCLEROSIS-CLUSTER_UP	Probe set of apoE-/- aorta up-regulated between 6 and 32 wk: atherosclerosis cluster. (Table S1-A; Pubmed:19139167)
GO_CC_MM_EXTRACELLULAR_REGION	GO:0005576 ; GO Term Name: extracellular region ; GO domain: cellular_component ; GO Evidence Code: IEA
LIT_MM_HERNANDEZ-NOVOA_PNEUMOCYSTIS_EXPOSED_UNEXPOSED_CB_D34_UP	Genes included in cluster B (Table S-III; Pubmed:18467653)
LIT_MM_MA_ATM-1_MOCK_INTESTINES_UP	ATM-1/mock,Average log2 expression values, statistics, and fold change values for microarray hits,expression of these genes in the intestines of ATM-6-infected mice was intermediate between mock-infected and ATM-1-infected mice (Table S1; Pubmed:20150509)
GO_BP_MM_TRANSLATION	GO:0006412 ; GO Term Name: translation ; GO domain: biological_process ; GO Evidence Code: IEA
L2L_MM_HSC_INTERMEDIATEPROGENITORS_ADULT	Up-regulated in mouse hematopoietic intermediate progenitors from adult bone marrow (Intermediate Progenitors Shared + Adult)
LIT_MM_DING_PTENPCSMAD4PC_PTENPC_ANTE-PS-TUMOR_15WK_UP	UP_Differentially expressed gene list was generated by a class comparison between Ptenpc-/- (n=5) and Ptenpc-/- Smad4pc-/-(n=5) anterior prostate tumors at 15 weeks of age (Dataset S2; Pubmed:21289624)
LIT_MM_LIN_FOXP3EGFP_EGFP-PLUS_VS_EGFP-MINUS_DN
STITCH_MM_SPHINGOSINE_1-PHOSPHATE-CID005283560	sphingosine 1-phosphate(CID005283560) from STITCH (Search Tool for Interactions of Chemicals), data from GeneSetDB.
LIT_MM_JANSSEN_LUNG_1D_RSV-INFECTION_UP	Up day 1-regulated >1.5-fold and >2-fold in the lungs of mice on days 1 and 3 after RSV infection (Table S1; Pubmed:17376894)
LIT_MM_LACAZE_CLUSTER2_5L_5C_MOCK_TRANSFECTION_UP	UP cluster2 5L vs. 5C Mock transfection gene expression clusters (Addi. file 1 ; Pubmed:19664281)
LIT_MM_LIN_FOXP3EGFP-EGFP-PLUS_VS_FOXP3EGFP-EGFP-MINUS_DN
STITCH_MM_NITRIC_OXIDE-CID000000945	nitric oxide(CID000000945) from STITCH (Search Tool for Interactions of Chemicals), data from GeneSetDB.
LIT_MM_RONG_SS2-INFECTED-A-J_VS_CONTROL-A-J_UP	up-The differentially expressed genes between SS2-infected A/J and control A/J mice (Table S1; Pubmed:22384161)
MICROCOSM_TARGETS_MM_HSA-MIR-424	hsa-miR-424 from MicroCosm Targets, data from GeneSetDB.
LIT_MM_ASSCHE_AA_CTA_C57BL_6-APOE_UP	UP List of genes that were up- or downregulated in the AA versus the CTA of C57Bl/6 and apoE??mice, or both strains(common) (Table 2; Pubmed:?0606469)
LIT_MM_GARCIA-ORTIZ_FETAL-OVARY_WNT4-NULL_DN	Down in Wnt4-null (Additional file 8C; Pubmed:19538736)
LIT_MM_RUSH_AORTA_AAA-GROUP_NOAAA-GROUP_UP	AAA_UP_List of transcripts differentially expressed in aortas of mice exposed to angiotensin II which did (AAA group) and did not (no AAA group) develop aneurysms (Additional file 3; Pubmed:19580648)
LIT_MM_BOCHMANN_COMPARATIVE_EPICARDIAL-SIGNATURE_MYOCARDIAL-INFARCTION_DIFF	Comparative analyses of epicardial signature genes. Data supporting Figure S2. (Table S5; Pubmed:20596535)
STITCH_MM_DOPAMINE-CID000000681	dopamine(CID000000681) from STITCH (Search Tool for Interactions of Chemicals), data from GeneSetDB.
LIT_MM_ANSIEAU_MEFCELL-H-RASV12-TWIST1-2_INTERLEUKIN-CHEMOKINE_DIFF	Gene Expression Analysis of Interleukins, Interleukin receptors, Chemokines, and Chemokine Receptors in MEF Cells and MEF Cells Sequentially Infected with RasV12 and Twist Retroviral Expression Constructs (Table S1; Pubmed:18598946)
GENESIGDB_MM_ASTOLFI_05_BREAST_VACCINATIONLIST	Mouse Breast_Astolfi05_155genes_VaccinationList; 15793299-TableA; data from GeneSigDB: http://compbio.dfci.harvard.edu/genesigdb/download/ALL_SIGSv4.gmt.
STITCH_MM_SEROTONIN-CID000005202	serotonin(CID000005202) from STITCH (Search Tool for Interactions of Chemicals), data from GeneSetDB.
LIT_MM_KAWAGOE_MALP-2-STIMULATION_IRAK2_IRAK1-YIRAK2MACROPHAGE_UP	Gene lists and expression profiles of MALP-2-inducible genes in wild-type, Irak2-/- and Irak1?/YIrak2-/- macrophages (Table S1; Pubmed:18438411)
GO_MF_MM_STRUCTURAL_CONSTITUENT_OF_RIBOSOME	GO:0003735 ; GO Term Name: structural constituent of ribosome ; GO domain: molecular_function ; GO Evidence Code: IEA
LIT_MM_BURKE_TRANSCRIPTIONAL-PROFILE_LIVER-ONLY_UP	Up Liver Only,Gene lists generated by comparison of microarray data transcriptional profiles from the liver and spleen data from the liver and spleen (Dataset S2; Pubmed:20502518)
MPO_MM_INCREASED_CD4-POSITIVE_T_CELL_NUMBER	increased CD4-positive T cell number from MPO (Mammalian Phenotype Ontology), data from GeneSetDB.
L2L_MM_ARTHRITIS_MOUSE_IL1KO_UP	Up-regulated in joint tissue from severely arthritic 13 week-old IL-1Ra knock-out mice, versus wild-type littermate controls.
LIT_MM_BRUNSKILL_15.5_DBGLOM_ENDOTHELIAL-CELL_DN	DN [15.5] vs [dbglom]Differentially expressed endothelial genes. 786 genes with most distinct expression patterns across all endothelial cell samples (Suppl. Data S1; Pubmed:20706631)
STITCH_MM_ASPIRIN-CID100002244	aspirin(CID100002244) from STITCH (Search Tool for Interactions of Chemicals), data from GeneSetDB.
STITCH_MM_HYDRON_DIPHOSPHATE-CID018988969	hydron diphosphate(CID018988969) from STITCH (Search Tool for Interactions of Chemicals), data from GeneSetDB.
STITCH_MM_SEROTONIN-CID100005202	serotonin(CID100005202) from STITCH (Search Tool for Interactions of Chemicals), data from GeneSetDB.
SIDER_MM_ASCITES	Ascites from SIDER (SIDe Effect Resource), data from GeneSetDB.
LIT_MM_LACAZE_SOD2_IFN_VS_RISCFREE_IFN_RNAI_DN	DN SOD2_IFN+ vs. Riscfree_IFN+,RNAi gene expression clusters (Addi. file 8; Pubmed:19664281)
LIT_MM_BANUS_B-PERTUSSIS-INOCULATED_LUNG_DIFF	Comparative gene expression profiling in two congenic strains of mice following Bordetella pertussis infection.--in B. pertussis-inoculated lungs (FDR <0.05, corresponding to P<0.0058). (Table S3; Pubmed:17935610)
TF_MM_ZHAO_JUN	Target genes of transcription factor JUN, experimentally confirmed according to Transcriptional Regulatory Element Database (TRED).
LIT_MM_KIM_P-CHABAUDI-INFECTED_WHOLE-BLOOD_INTERMEDIATE_UP	Intermediate_List of genes which increase in abundance in whole blood of P. chabaudi-infected mice. (Table S1; Pubmed:18824529)
MSIGDB_MM_IVANOVA_HEMATOPOIESIS_INTERMEDIATE_PROGENITOR	Genes in the expression cluster 'Intermediate Progenitors Shared': up-regulated in hematopoietic intemediate progenitor cells from adult bone marrow and fetal liver.
LIT_MM_LEBER_MACROPHAGE_HLY-L-MONOCYTOGENE_180MIN_UP	UP_Genes identified by SAM and at least 4-fold induced in WT macrophages by hly L. monocytogenes (Dataset S1; Pubmed:18193943)
MIRNA_MM_WANG_MMU-MIR-384-3P	WANG_MMU-MIR-384-3P; Prediction of both conserved and nonconserved microRNA targets in animals 2008.
KEGG_MM_PHAGOSOME	Phagosome http://www.genome.jp/kegg-bin/show_pathway?mmu04145
L2L_MM_RB_CREKO_DN	Down-regulated at 144 hours after disruption of Rb in adult mouse fibroblasts by Cre recombination, versus GFP controls.
LIT_MM_LIU_11KA_SPI2A_MEMORY-T-LYMPHOCYTE_UP	up-DNA 11kA array analysis of gene expression in B6.2.16 CD8 cells (Table S1; Pubmed:15311278)
LIT_MM_CAMATEROS_ANTIGEN-CHALLENGED_A_J_DIFF	Genes whose expression was significantly altered following antigen challenge in A/J mice (Table S7; Pubmed:19491150)
EHMN_MM_UREA_CYCLE_AND_METABOLISM_OF_ARGININE_PROLINE_GLUTAMATE_ASPARTATE_AND_ASPARAGINE	Urea_cycle_and_metabolism_of_arginine,_proline,_glutamate,_aspartate_and_asparagine from EHMN (Edinburgh Human Metabolic Network), data from GeneSetDB.
MIRNA_MM_WANG_MMU-MIR-335-5P	WANG_MMU-MIR-335-5P; Prediction of both conserved and nonconserved microRNA targets in animals 2008.
LIT_MM_DATTA_CT-FORSKOLIN_DIFF	Genes regulated by both cholera toxin and forskolin (Table S1; Pubmed:20479237)
LIT_MM_SINGH_BMM-IPA_H37RV-INFECTION_UP	H37Rv infection induced_List of genes suppressed or rescued by exosomes isolated from M.tb(Mycobacterium tuberculosis) infected cells following stimulation with IFN-? (Table S1; Pubmed:21533172)
LIT_MM_GEBEL_CS-EXPOSURE_5M-13D-PE_UP	UP wt 5 m + 13 d pe,the strong impact of CS(Cigarette Smoke) exposure on the transcriptome of rodent lung tissue cells (Table S1; Pubmed:20133372)
LIT_MM_RAMPON_PCDH12_PLACENTA_DEVELOP_TISSUE-MORPHOGENEIS_UP	Heat map of differentially expressed genes related to development and tissue morphogenesis (Figure S4; Pubmed:18477666)
LIT_MM_GEBEL_CS-EXPOSURE_5M-1D-PE_UP	UP wt 5 m + 1 d pe,the strong impact of CS(Cigarette Smoke) exposure on the transcriptome of rodent lung tissue cells (Table S1; Pubmed:20133372)
LIT_MM_LACAZE_CLUSTER2_24L_24C_MOCK_TRANSFECTION_UP	UP cluster2 24L vs. 24C Mock transfection gene expression clusters (Addi. file 1 ; Pubmed:19664281)
LIT_MM_GEBEL_CS-EXPOSURE_KO-5M_UP	UP ko 5 m,the strong impact of CS(Cigarette Smoke) exposure on the transcriptome of rodent lung tissue cells (Table S1; Pubmed:20133372)
LIT_MM_YOUNG_GENOTYPE-RAG1_UP	experimentTable-tsv-E-MEXP-3623--genotype-Rag1-_--CONDITION_UP (Gene Expression Atlas - E-MEXP-3623-EBI; Pubmed:23103862)
LIT_MM_SZANTO_PPARGFL_LYSCRE_IL-4_C_UP	Pgfl/?-UP_Genes Regulated by IL-4 in Ppar?+/?LysCre and Ppargfl/?LysCre Mouse Macrophages (Table S2; Pubmed:21093321)
LIT_MM_AMIT_CBX4_UP	Cbx4 knockdown affected few genes (Table S12; Pubmed:19729616)
LIT_MM_SZANTO_STAT6_RSG_UP	Total RSG-induced_Genes Regulated by PPAR? in Wild-Type and Stat6?/? Mouse Macrophages (Table S3; Pubmed:21093321)
MPO_MM_ABNORMAL_MACROPHAGE_PHYSIOLOGY	abnormal macrophage physiology from MPO (Mammalian Phenotype Ontology), data from GeneSetDB.
STITCH_MM_NITRIC_OXIDE-CID100000945	nitric oxide(CID100000945) from STITCH (Search Tool for Interactions of Chemicals), data from GeneSetDB.
MSIGDB_MM_MARKEY_RB1_ACUTE_LOF_UP	Genes up-regulated in adult fibroblasts with inactivated RB1 [GeneID=5925] by Cre-lox: acute loss of function (LOF) of RB1.
KEGG_MM_CHEMOKINE_SIGNALING_PATHWAY	Chemokine signaling pathway http://www.genome.jp/kegg-bin/show_pathway?mmu04062
GENESIGDB_MM_JEONG_06_LIVER_3	Mouse Liver_Jeong06_492genes; 16423883-Table2S; data from GeneSigDB: http://compbio.dfci.harvard.edu/genesigdb/download/ALL_SIGSv4.gmt.
LIT_MM_SHAROV_AD-LIBITUM-DIET_FEMALE_OVARY_YOUNG-1-6M_OLD-16-24M_DIFF	Genes with differential expression in ovary between young (1-6 mo) and old (16-24 mo) female on ad libitum diet (Additional file 4; Pubmed:18522719)
LIT_MM_CLODFELTER_129J聇LACK-SWISS_SEX-SPECIFIC_DIFF	A. 551 genes that are sex-specific in the 129J x Black Swiss strain data set but not the other mouse strain (Table S6; Pubmed:17536022)
MIRNA_MM_BETEL_MMU-MIR-1939	BETEL_MMU-MIR-1939; Good mirSVR score Non-conserved; The microRNA.org resource: targets and expression.
LIT_MM_PELLEGATTA_GL261-NS_VS_GL261-AC_TUMOR_DN	down-Expression profiling identifies a radial glia signature in GL261-NS and GL261-AC,--tumor formation at different time points (Table S2; Pubmed:17079441)
LIT_MM_WEISCHENFELDT_2FL_VS_FL_LYSMCRE_BMM_UP	Upf2fl/fl;LysMCre BMM set (Table S2; Pubmed:18483223)
TFACTS_MM_NFKB1	Target genes of transcription factor NFKB1, predicted by TFactS, data from GeneSetDB.
MSIGDB_MM_CHIARADONNA_NEOPLASTIC_TRANSFORMATION_CDC25_DN	Genes down-regulated in reverted NIH3T3 cells (fibroblasts transformed by activated KRAS [GeneID=3845] which then reverted to normal cells upon stable over-expression of a dominant negative form of CDC25 [GeneID=5923]) vs normal fibroblasts.
CTD_MM_LIPOPOLYSACCHARIDES	Lipopolysaccharides from CTD (Comparative Toxicogenomics Database), data from GeneSetDB.
LIT_MM_HILL_COMMON-TREG-CELL-SIGNATURE_C5_DIFF	cluster5_Cluster analysis of expression correlations between all genes within the common Treg cell signature (Table S1; Pubmed:18024188)
SIDER_MM_PLEURAL_EFFUSION	Pleural effusion from SIDER (SIDe Effect Resource), data from GeneSetDB.
GENESIGDB_MM_BEISIEGEL_09_LUNG	Mouse Lung_Beisiegel09_262genes; 19795415-Table1; data from GeneSigDB: http://compbio.dfci.harvard.edu/genesigdb/download/ALL_SIGSv4.gmt.
GO_MF_MM_GTPASE_ACTIVITY	GO:0003924 ; GO Term Name: GTPase activity ; GO domain: molecular_function ; GO Evidence Code: IEA
LIT_MM_CHEN_MACROPHAGE-ENRICHED-NETWORK_DIFF	Genes in the macrophage-enriched network described in the main text. (Table S3[The 774th(between Mapk7 and Matn2) is 06-Mar in original material, excluded]; Pubmed:18344982)
SIDER_MM_PLEURAL_DISORDER	Pleural disorder from SIDER (SIDe Effect Resource), data from GeneSetDB.
LIT_MM_MITIKU_POSTIMPLANTATION-EMBRYOGENEIS_E8.0A-E8.0B_UP	E8.0a-E8.0b_Genes Increasing more than 3-fold on each Interval (Table S2; Pubmed:18061570)
STITCH_MM_ASPIRIN-CID000002244	aspirin(CID000002244) from STITCH (Search Tool for Interactions of Chemicals), data from GeneSetDB.
LIT_MM_MAJUMDER_RAPAMYCIN-INHIBITOR_DIFF	Ranking of genes based on the Pearson correlation with the gene vector representing the idealized gene expression response to an mTOR inhibitor (Table S1; Pubmed:15156201)
LIT_MM_DELGADO_E2F2-DELETION-NOT-AFFECTED_LIVER_DN	down-Genes regulated during liver regeneration whose expression change was not significantly affected by E2F2 deletion (Table S3; Pubmed:21527726)
L2L_MM_ARTHRITIS_MOUSE_COMMON_UP	Up-regulated in joint tissue from both severely arthritic HTLV-I transgenic mice and IL-1Ra knock-out mice, versus wild-type littermate controls.
LIT_MM_COPPIN_HFE_DUODENUM_C1_D2KO_D2WT_UP	cluster1_Genes regulated by Hfe disruption in D2 and/or B6 duodenum (Additional file 2; Pubmed:17945001)
LIT_MM_YANG_LIVER_MALE_GAS7-TRANSGENIC_DIFF	Liver gene expression signature of Gas7 male tg at p<0.05 (Table S7; Pubmed:19270708)
LIT_MM_SCHULZ_LEPTIN_TROPHOBLAST-CELL_1H_6H_DN	DN_All genes with significantly different expression between leptin-treated trophoblast cells at 1 h and 6 h (Supp Data-6h; Pubmed:19038858)
GO_BP_MM_CELL_CYCLE	GO:0007049 ; GO Term Name: cell cycle ; GO domain: biological_process ; GO Evidence Code: IEA
LIT_MM_KIM_C10-CONGENIC-LINE_VS_A_J_P56-HIPPOCAMPI_UP	UP_Summary of differentially expressed genes between A/J and C10 congenic lines in P56 hippocampi (Supplement 7-Table S2; Pubmed:18986647)
MSIGDB_MM_QI_PLASMACYTOMA_UP	Up-regulated genes that best disciminate plasmablastic plasmacytoma from plasmacytic plasmacytoma tumors.
LIT_MM_LI_CO2_NEONATAL_LUNG_DN	down-The altered genes in mice exposed to 8% CO2 were first analyzed based on the level of expression change (Table S1; Pubmed:16888043)
LIT_MM_SOMERVAILLE_HIGH_LOW-LSC_MLL-LEUKEMIA_MLL-AF10-LEUKEMIA_UP	Probe sets positively correlated with LSC frequency in both data sets (Table S6; Pubmed:19200802)
SIDER_MM_NEUROPATHY	Neuropathy from SIDER (SIDe Effect Resource), data from GeneSetDB.
SIDER_MM_EFFUSION	Effusion from SIDER (SIDe Effect Resource), data from GeneSetDB.
LIT_MM_RONG_SS2-INFECTED-A-J_VS_SS2-INFECTED-B6_DN	down-The differentially expressed genes between SS2-infected A/J and SS2-infected B6 mice (Table S1; Pubmed:22384161)
LIT_MM_ROUX_B-MELITENSIS-16M_DIFF	Genes differentially expressed in response to infection with B. melitensis 16M (Table S1; Pubmed:17441987)
LIT_MM_LACAZE_IFI47_IFN_VS_RISCFREE_IFN_RNAI_DN	DN Ifi47_IFN+ vs. Riscfree_IFN+,RNAi gene expression clusters (Addi. file 8; Pubmed:19664281)
LIT_MM_NISHIYAMA_TF-DLX3_ES-CELL_DN	Dlx3 Genes up-regulated or down-regulated >=2 fold in response to manipulation of transcription factors (Table S3; Pubmed:19796622)
LIT_MM_HUNTER_AKR_DBA_WHOLE-BLOOD_DIFF	Mouse AKR vs DBA whole blood gene list (Table S5; Pubmed:19118016)
LIT_MM_MORRIS_ENRICHED_EGFP-POSITIVE_VS_EGFP-NEGATIVE_DCHIP_DN	down-Genes identified as depleted in stem cells from dChip analysis (using a cutoff LCB>1.2 for all three pairs of samples ). (Table S4; Pubmed:15024388)
LIT_MM_BUNGER_1138_WY14643_DIFF	diff-1138_WTcontrol_WTWY14643 (Table S2; Pubmed:17426115)
STITCH_MM_PROSTAGLANDIN_D2-CID000448457	prostaglandin D2(CID000448457) from STITCH (Search Tool for Interactions of Chemicals), data from GeneSetDB.
GENESIGDB_MM_PUCCI_09_STEM_CELL_2	Mouse StemCell_Pucci09_80genes; 19383967-Table1; data from GeneSigDB: http://compbio.dfci.harvard.edu/genesigdb/download/ALL_SIGSv4.gmt.
CTD_MM_DEXAMETHASONE	Dexamethasone from CTD (Comparative Toxicogenomics Database), data from GeneSetDB.
LIT_MM_LIU_11KB_SPI2A_MEMORY-T-LYMPHOCYTE_UP	up-DNA 11kB array analysis of gene expression in B6.2.16 CD8 cells (Table S2; Pubmed:15311278)
GO_CC_MM_LYSOSOME	GO:0005764 ; GO Term Name: lysosome ; GO domain: cellular_component ; GO Evidence Code: IEA
GO_CC_MM_RIBOSOME	GO:0005840 ; GO Term Name: ribosome ; GO domain: cellular_component ; GO Evidence Code: IEA
STITCH_MM_MELATONIN-CID000000896	melatonin(CID000000896) from STITCH (Search Tool for Interactions of Chemicals), data from GeneSetDB.
LIT_MM_PANCHAL_EBOV_CD4562_DIFF	List of genes with coefficient of variation > 1.4 included in Fig. 5A,Early Control of Gene Expression in EBOV-Infected CD4562% Mice (Table S1; Pubmed:19683682)
LIT_MM_SHE_CNV-GENE_WITHIN-SDS_DIFF	genes embedded within SDs that showed either gain or loss (Table S6; Pubmed:18500340)
HPO_MM_APLASIA_HYPOPLASIA_AFFECTING_THE_EYE	Aplasia/Hypoplasia affecting the eye from HPO (Human Phenotype Ontology), data from GeneSetDB.
LIT_MM_EDWARDS_CD4_VS_CD8ALPHA_UP	Table II - CD4+>CD8alpha+ (Table II; Pubmed:12816982)
LIT_MM_DRISKELL_GFP-PLUS-CD133_GFP-CD133_MINUS_VS_GFP-CD133-MINUS_DN	DN Genes differentially expressed in GFP+ CD133+ and GFP? CD133+ dermal cells compared with GFP? CD133? dermal cells (Table S1; Pubmed:19605494)
LIT_MM_STRACKER_IRRADIATED_MOCK_THYMOCYTE_DN	DN_Significant expression changes between mock and irradiated WT thymocyte (Table S2; Pubmed:18614044)
LIT_MM_FABANI_PEPTIDE-NUCLEIC-ACIDS_DN	up-regulated gene--peptide nucleic acids (PNAs) (Table S1; Pubmed:20223773)
SIDER_MM_URTICARIA	Urticaria from SIDER (SIDe Effect Resource), data from GeneSetDB.
LIT_MM_GRABNER_APOE_AORTA_78W_32W_ATLO-CLUSTER_UP	Probe set of apoE-/- aorta up-regulated between 32 and 78 wk: ATLO cluster (Table S1-B; Pubmed:19139167)
KEGG_MM_TUBERCULOSIS	Tuberculosis http://www.genome.jp/kegg-bin/show_pathway?mmu05152
LIT_MM_YE_Z_NORRIN-YOLK-SACS_ENDOTHELIAL-CELL_DIFF	Micro-array hybridization data for independent triplicate samples from WT and Z/Norrin yolk sacs at E8.5 and E10.5 (12 samples total). Values are listed for those probe sets for which the WT vs. Z/Norrin yolk sacs showed a fold change greater than 2 and a P-value less than 0.01 (Table S1; Pubmed:19837032)
LIT_MM_CAMATEROS_ANTIGEN-CHALLENGED_C57BL_6_DIFF	Genes whose expression was significantly altered following antigen challenge in C57BL/6 mice. (Table S8; Pubmed:19491150)
LIT_MM_LORZ_NONHFSC_HFSC_EPIDERMIS_UP	UP nonHFSC(Hair follicle stem cells) vs. HFSC p<0.01 MD>2 (Table S1; Pubmed:20376578)
STITCH_MM_ETHANOL-CID100000702	ethanol(CID100000702) from STITCH (Search Tool for Interactions of Chemicals), data from GeneSetDB.
LIT_MM_ROBBINS_DC-SUBSET_CONSERVED-SPECIFIC-TRANSCRIPTOMIC_DIFF	Conserved specific transcriptomic signatures of DC subset compared to one another (Table 6; Pubmed:18218067)
LIT_MM_RONG_SS2-INFECTED-B6_VS_CONTROL-B6_UP	up-The differentially expressed genes between SS2-infected B6 and control B6 mice (Table S1; Pubmed:22384161)
LIT_MM_ZASLONA_PBMO_LUNG-DC_LUNG-M-PHI_DIFF	Most strongly and significantly regulated genes belonging to selected gene clusters;Differentially expressed genes between PBMo, lung DC and lung M? (Table 1; Pubmed:?9149869)
LIT_MM_NOH_SRPA_ASYM_SYM_UP	ASYM/SYM_UP_Self-renewal pattern associated (SRPA) genes, including the 85-gene asymmetric self-renewal associated (ASRA) gene signature (Table S1; Pubmed:21818293)
MIRNA_MM_WANG_MMU-MIR-26A-2-3P	WANG_MMU-MIR-26A-2-3P; Prediction of both conserved and nonconserved microRNA targets in animals 2008.
STITCH_MM_EPINEPHRINE-CID100000838	epinephrine(CID100000838) from STITCH (Search Tool for Interactions of Chemicals), data from GeneSetDB.
LIT_MM_LOPEZ_EDKO_UP	up-EDKO vs Control (Table S1; Pubmed:19749746)
SIDER_MM_ANGIOPATHY	Angiopathy from SIDER (SIDe Effect Resource), data from GeneSetDB.
LIT_MM_SCHADE_ACTIVATED-NEU-MUTANT_BASIS_DIFF	Basis Gene List (Table S1; Pubmed:17699761)
HPO_MM_ACIDOSIS	Acidosis from HPO (Human Phenotype Ontology), data from GeneSetDB.
GO_MF_MM_GTP_BINDING	GO:0005525 ; GO Term Name: GTP binding ; GO domain: molecular_function ; GO Evidence Code: IEA
MPO_MM_DECREASED_LYMPHOCYTE_CELL_NUMBER	decreased lymphocyte cell number from MPO (Mammalian Phenotype Ontology), data from GeneSetDB.
LIT_MM_LACAZE_LYN_IFN_VS_RISCFREE_IFN_RNAI_DN	DN Lyn_IFN+ vs. Riscfree_IFN+,RNAi gene expression clusters (Addi. file 8; Pubmed:19664281)
MIRNA_MM_WANG_MMU-MIR-3081-5P	WANG_MMU-MIR-3081-5P; Prediction of both conserved and nonconserved microRNA targets in animals 2008.
LIT_MM_BRUNSKILL_BUD_RENAL-VESICLE_15.5-RENAL-ENDO_STEM-CELL_UP	207 genes with elevated expression in embryonic endothelia compared to other kidney embryonic compartments (Suppl. Data S4; Pubmed:20706631)
STITCH_MM_PROSTAGLANDIN_D2-CID100004956	prostaglandin D2(CID100004956) from STITCH (Search Tool for Interactions of Chemicals), data from GeneSetDB.
LIT_MM_LACAZE_TRAF1_IFN_VS_RISCFREE_IFN_RNAI_UP	UP Traf1_IFN+ vs. Riscfree_IFN+,RNAi gene expression clusters (Addi. file 8; Pubmed:19664281)
GO_MF_MM_NUCLEOTIDE_BINDING	GO:0000166 ; GO Term Name: nucleotide binding ; GO domain: molecular_function ; GO Evidence Code: IEA
STITCH_MM_INDOMETHACIN-CID000003715	indomethacin(CID000003715) from STITCH (Search Tool for Interactions of Chemicals), data from GeneSetDB.
MIRNA_MM_WANG_MMU-MIR-154-3P	WANG_MMU-MIR-154-3P; Prediction of both conserved and nonconserved microRNA targets in animals 2008.
HPO_MM_APLASIA_HYPOPLASIA_AFFECTING_THE_FUNDUS	Aplasia/Hypoplasia affecting the fundus from HPO (Human Phenotype Ontology), data from GeneSetDB.
LIT_MM_DEROO_TGF_D28E-MAMMARY-GLAND_DN	down-TGF?-responsive genes also present in the d28E mammary gland dataset. (Table S8; Pubmed:19484750)
LIT_MM_LOTZER_TNF-2H_SMCS_DISTINCT-KINETICS_UP	UP a. TNF-regulated probe sets at 2h, TNF- and ?-LT?R-regulated probe sets at 2, 6, and 24h,TNF- and?-LT?R-induced mRNAs follow distinct kinetics.Microarrays were prepared after stimulation of SMCs with TNF or ?-LT?R (Table SI.a; Pubmed:20139367)
SIDER_MM_PERIPHERAL_SENSORY_NEUROPATHY	Peripheral sensory neuropathy from SIDER (SIDe Effect Resource), data from GeneSetDB.
LIT_MM_WU_OSTEOSARCOMA_MYC-INACTIVATION_RR_DN	genes reversibly repressed (RR) upon MYC inactivation. (Table S2; Pubmed:18535662)
LIT_MM_LAROSA_INFLAMMATION_DIFF	A subset of changes in genes associated with Inflammation detected by Affymetrix array analysis. The values represent treatment signal fold changes relative to control for each time point. (Table S3; Pubmed:16868072)
LIT_MM_HAUSER_BCR_B-CELL_DN	DN Rapid differential gene expression upon BCR activation (Table S1; Pubmed:19553523)
TF_MM_ZHAO_NFKB1	Target genes of transcription factor NFKB1, experimentally confirmed according to Transcriptional Regulatory Element Database (TRED).
LIT_MM_LEE_C1_GD-MODEL_DOPAMINERGIC-NEURON_ESC_DIFF	Cluser 1-Genes and clusters in K-means clustering analysis-- gene expressions of the guided differentiation (GD) model for dopaminergic (DA) neurons from mouse ESCs (Table SB; Pubmed:16627687)
LIT_MM_MOLYNEUX_C6_TUMOUR_BLG-CRE-BRCA1_P53_SOM_DIFF	C6-Variable expression in tumours--Gene Expression Clusters in Blg-Cre Brca1f/f p53+/? Tumors Identified by SOM Analysis. (Table S4; Pubmed:20804975)
MIRNA_MM_WANG_MMU-MIR-1A-2-5P	WANG_MMU-MIR-1A-2-5P; Prediction of both conserved and nonconserved microRNA targets in animals 2008.
MIRNA_MM_WANG_MMU-MIR-1969	WANG_MMU-MIR-1969; Prediction of both conserved and nonconserved microRNA targets in animals 2008.
GO_BP_MM_PROTEIN_FOLDING	GO:0006457 ; GO Term Name: protein folding ; GO domain: biological_process ; GO Evidence Code: ISS
LIT_MM_HUANG_LIVER-CIS_EQTLS_DIFF	liver-cis-Genes that lie within eQTL 95% confidence intervals containing five or fewer genes--expression quantitative trait loci (eQTLs) in rodents has been limited by the low mapping resolution inherent in crosses between inbred strains (Table S1; Pubmed:19376938)
SIDER_MM_BLOOD_UREA_INCREASED	Blood urea increased from SIDER (SIDe Effect Resource), data from GeneSetDB.
LIT_MM_CAITLIN_GERMLINE-REMOVAL-E2F4_LIVER_KIDNEY_TESTE_GO_DIFF	455 unique genes identified by GO. (460 listed here) (Table S7; Pubmed:17957245)
LIT_MM_LACAZE_MOCK-TRANSFECTIONS_DIFF	Genes differentially regulated in mock transfections (571 genes) (Addi. file 2; Pubmed:19664281)
LIT_MM_BJORKBACKA_AORTAS-MYD88_APOE-MICE_DIFF	Differential gene expression in the aortas of Myd88-/-Apoe-/- mice (Table S2; Pubmed:15034566)
LIT_MM_MCINTYRE_EMX2_VS_EMX2_UP	UP_Transcript clusters that differed significantly between Emx2-/- and Emx2+/+ mice (Table S1; Pubmed:18854508)
LIT_MM_HOLLOWAY_LIVER_HNF4ALPHA-INDEPEND_SEX-SPECIFIC_DIFF	199 sex-specific genes that are not affected by the loss of HNF4? (TFS groups 4A and 4B) (Table S4; Pubmed:18276827)
LIT_MM_LACAZE_SOD2_IFN_VS_RISCFREE_IFN_RNAI_UP	UP SOD2_IFN+ vs. Riscfree_IFN+,RNAi gene expression clusters (Addi. file 8; Pubmed:19664281)
LIT_MM_HUNTER_AKR_DBA_THYMUS_DIFF	Mouse AKR vs DBA thymus gene list (Table S9; Pubmed:19118016)
LIT_MM_GARCIA-ORTIZ_FETAL-OVARY_FOXL2-NULL_UP_WNT4-NULL_DN	Genes up in Foxl2-null and down in Wnt4-null ovaries relative to fetal wildtype ovaries (Additional file 7B; Pubmed:19538736)
LIT_MM_SERVITJA_HNF1A_LIVER_DN	Genes downregulated >3-fold in Hnf1a-/- liver grouped by functional categories (Table S1; Pubmed:19289501)
LIT_MM_LACAZE_CLUSTER2_5R_5C_MOCK_TRANSFECTION_UP	UP cluster2 5R vs. 5C Mock transfection gene expression clusters (Addi. file 1 ; Pubmed:19664281)
LIT_MM_KITAMURA_TOTAL-CELLULAR-FRACTION_LPS-TREATMENT_UP	Transcripts increased in total cellular fraction by LPS treatment (Table S1; Pubmed:18230670)
LIT_MM_RATHINAM_SPLENIC-CD19-CD138-BCELL_GFI1_VS_GFI1_UP	UP_gene expression profile in splenic CD19 CD138 B cells of Gfi1-/- mice compared with Gfi1?/? littermates. (Table S1; Pubmed:18941212)
LIT_MM_RODRIGUEZ_INFECTION-CHLAMYDIA-PNEUMONIAE_DIFF	Selected expression values and fold changes sorted by cluster membership--Different expression patterns of genes (clusters A) on infection with Chlamydia pneumoniae (Table 1; Pubmed:17374847)
MPO_MM_ANEMIA	anemia from MPO (Mammalian Phenotype Ontology), data from GeneSetDB.
GO_CC_MM_MITOCHONDRION	GO:0005739 ; GO Term Name: mitochondrion ; GO domain: cellular_component ; GO Evidence Code: IDA
LIT_MM_ESAU_LIVER_4W_ALINE_VS_MIR-122-ASO-2W_DN	Downregulated Genes--Liver gene expression was evaluated following 4 weeks of treatment with 50 mg/kg of miR-122 ASO twice weekly and was compared with saline-treated animals (Tables S1 and S2). (Table S2; Pubmed:16459310)
LIT_MM_MASCARENHAS_WA_DN	WA DOWN (Table S1; Pubmed:19794138)
LIT_MM_SZANTO_PPARG_VS_LYSCRE_IL-4_C_UP	Pg+--UP_Genes Regulated by IL-4 in Pparg+/?LysCre and Ppargfl/?LysCre Mouse Macrophages (Table S2; Pubmed:21093321)
LIT_MM_LACAZE_IFI47_IFN_VS_RISCFREE_IFN_RNAI_UP	UP Ifi47_IFN+ vs. Riscfree_IFN+,RNAi gene expression clusters (Addi. file 8; Pubmed:19664281)
LIT_MM_GEBEL_CS-EXPOSURE_5M_UP	UP wt 5 m,the strong impact of CS(Cigarette Smoke) exposure on the transcriptome of rodent lung tissue cells (Table S1; Pubmed:20133372)
LIT_MM_SERVITJA_HNF1A_ISLETS_UP	Genes upregulated >3-fold in Hnf1a-/- islets grouped by functional categories (Table S1; Pubmed:19289501)
LIT_MM_HARTMAN_ONTOLOGY-GROUP_AD-INFECTION_MEF_UP	Significantly upregulated Gene Ontology Groups after Ad infection in MEFs (Table S1; Pubmed:17027060)
MICROCOSM_TARGETS_MM_HSA-MIR-130B	hsa-miR-130b from MicroCosm Targets, data from GeneSetDB.
SIDER_MM_DROWSINESS	Drowsiness from SIDER (SIDe Effect Resource), data from GeneSetDB.
STITCH_MM_ETHANOL-CID000000702	ethanol(CID000000702) from STITCH (Search Tool for Interactions of Chemicals), data from GeneSetDB.
MPO_MM_INCREASED_SUSCEPTIBILITY_TO_BACTERIAL_INFECTION	increased susceptibility to bacterial infection from MPO (Mammalian Phenotype Ontology), data from GeneSetDB.
LIT_MM_HARIBHAI_PTREG_TCONV_ITREG_TCONV_DN	DN Expressed genes common to iTreg (n=5 independent replicates) and Freshly isolated nTreg (n=4) cell preparations as compared to CD4+EGFP?Tconv cells (n=3) of Foxp3EGFP mice (Table S1; Pubmed:19265124)
STITCH_MM_EPINEPHRINE-CID000005815	epinephrine(CID000005815) from STITCH (Search Tool for Interactions of Chemicals), data from GeneSetDB.
LIT_MM_LACAZE_LYN_IFN_VS_RISCFREE_IFN_RNAI_UP	UP Lyn_IFN+ vs. Riscfree_IFN+,RNAi gene expression clusters (Addi. file 8; Pubmed:19664281)
MIRNA_MM_GRIMSON_MIR-378_422A_378BCDEFHI	GRIMSON_MIR-378_422A_378BCDEFHI; Predicted_Targets_Info; MicroRNA Targeting Specificity in Mammals: Determinants beyond Seed Pairing.
LIT_MM_OUYANG_FOXO1-DE_CD4_T-CELL_DIFF	Probesets for Differentially Expressed Genes in Foxo1-Deficient and Wild-Type CD4+ T Cells (Table S1; Pubmed:19285438)
LIT_MM_MITIKU_POSTIMPLANTATION-EMBRYOGENEIS_E6.25-E6.5_DN	E6.25-E6.5_Genes Decreasing more than 3-fold on each Interval (Table S3; Pubmed:18061570)
LIT_MM_SU_DELAYED-IMPLANTATION_EMBRYO_DN	Full list of differentially expressed genes from Digital gene expression data during delayed implantation (Table S3 ; Pubmed:21124741)
LIT_MM_HUANG_MAMMARY-TUMOR_MMTV-WNT-1_VS_MMTV-NEU-TG-MICE_UP	up-List of genes differentially expressed between mammary tumors from MMTV-Wnt-1 and MMTV-Neu TG mice (Table S1; Pubmed:16207355)
LIT_MM_BURKE_TRANSCRIPTIONAL-PROFILE_SPLEEN_DN_LIVER_UP	Down Spleen, Up Liver.Gene lists generated by comparison of microarray data transcriptional profiles from the liver and spleen data from the liver and spleen (Dataset S2; Pubmed:20502518)
MICROCOSM_TARGETS_MM_HSA-MIR-20B	hsa-miR-20b from MicroCosm Targets, data from GeneSetDB.
GO_BP_MM_REGULATION_OF_APOPTOTIC_PROCESS	GO:0042981 ; GO Term Name: regulation of apoptotic process ; GO domain: biological_process ; GO Evidence Code: IMP
LIT_MM_MAVRAKIS_FL5-12_MIR-19_VS_FL5-12_VECTOR-CELL_DN	Expression changes in FL5-12/miR-19 versus FL5-12/Vector cells (Table S5; Pubmed:20190740)
MPO_MM_ABNORMAL_CYTOKINE_SECRETION	abnormal cytokine secretion from MPO (Mammalian Phenotype Ontology), data from GeneSetDB.
SIDER_MM_GASTROINTESTINAL_DISORDER	Gastrointestinal disorder from SIDER (SIDe Effect Resource), data from GeneSetDB.
LIT_MM_RAMSEY_TLR-STIMULATED_MURINE_MACROPHAGE_DIFF	This spreadsheet contains the replicate-combined probeset intensities for all 1,960 differentially expressed genes (see Materials and Methods, Probeset Selection) across all 95 microarray experiments (see Table S3). --underlying TLR-stimulated murine macrophage activation (Table S4; Pubmed:18369420)
HPO_MM_APLASIA_HYPOPLASIA_OF_THE_OPTIC_NERVE	Aplasia/Hypoplasia of the optic nerve from HPO (Human Phenotype Ontology), data from GeneSetDB.
MIRNA_MM_WANG_MMU-MIR-194-1-3P	WANG_MMU-MIR-194-1-3P; Prediction of both conserved and nonconserved microRNA targets in animals 2008.
LIT_MM_GARCIA-ORTIZ_FETAL-OVARY_FOXL2-NULL_WNT4-NULL_DN	Genes down in Foxl2-null and down in Wnt4-null ovaries relative to fetal wildtype ovaries (Additional file 7D; Pubmed:19538736)
LIT_MM_SANDA_NOTCH1_T-ALL_LEUKEMIC_POLYCLONAL_DPCELL_G7_UP	group7_Differentially expressed genes in a Notch1-induced mouse model of T-ALL (Table S2; Pubmed:20007543)
GO_BP_MM_PROTEIN_TRANSPORT	GO:0015031 ; GO Term Name: protein transport ; GO domain: biological_process ; GO Evidence Code: IEA
LIT_MM_HARTMAN_MOCK-INFECTED-OUNTERPART_DN	Gene ontology categorization of significantly downregulated genes and significantly different as determined by one-way ANOVA with P < 0.05 and BH FDR MTC from mock-infected unterparts. (Table 6; Pubmed:17121790)
LOC_MM_CHR2_B	Genes in cytogenetic band chr2_B
LIT_MM_YUAN_SCA-1-KO_TUMOR_DN	DN_Gene expression in Sca-1 KO and wild-type tumors (Table S1; Pubmed:21955520)
NETPATH_MM_T_CELL_RECEPTOR_SIGNALING_PATHWAY	T cell receptor Signaling Pathway from NetPath, data from GeneSetDB.
STITCH_MM_INDOMETHACIN-CID100003715	indomethacin(CID100003715) from STITCH (Search Tool for Interactions of Chemicals), data from GeneSetDB.
LIT_MM_HARTMAN_MOCK-INFECTED-OUNTERPART_UP	Gene ontology categorization of significantly upregulated genes and significantly different as determined by one-way ANOVA with P < 0.05 and BH FDR MTC from mock-infected ounterparts. (Table 3; Pubmed:17121790)
LOC_MM_CHR17_B1	Genes in cytogenetic band chr17_B1
LIT_MM_MARQUIS_IRF8-MUTANT-MACROPHAGE_UP	up-Genes differentially regulated at basal level in wt vs. Irf8 mutant macrophages (pairwise analysis). (Table S1; Pubmed:21731497)
LIT_MM_DADRAS_PROX1-EXPRESS-PY-4-1-TRANSFECTED_UP	Upregulated genes in Prox1 expressing Py-4-1 cells as compared with control-transfected cells (Table S1; Pubmed:18580962)
CTD_MM_ACETAMINOPHEN	Acetaminophen from CTD (Comparative Toxicogenomics Database), data from GeneSetDB.
L2L_MM_LAL_KO_6MO_UP	Up-regulated at 6 months of age in lungs from lysosomal acid lipase (LAL) knockout mice, which display pulmonary pathology, versus wild-type controls
HPO_MM_OPTIC_ATROPHY	Optic atrophy from HPO (Human Phenotype Ontology), data from GeneSetDB.
LIT_MM_ZEIDLER-ERDELY_GMA-WELDING-FUME-EXPOSED-A_J-B6_LUNG_DIFF	Hierarchical clustering of differentially expressed genes in GMA welding fume-exposed A/J and B6 mice. Hierarchical clustering analysis of differentially expressed genes in the lungs of A/J and B6 mice exposed to GMA-MS or GMA-SS welding fume or PBS (sham) at 4 (panel A) and 16 weeks (panel B) post-exposure after FDR p-value adjustment (p < 0.05, n = 4/group) (Figure 1 ; Pubmed:20525249)
LIT_MM_CAMATEROS_RES_C57BL_6_DIFF	Genes whose expression was significantly altered following resiquimod treatment in C57BL/6 mice (Table S11; Pubmed:19491150)
LIT_MM_SAENZ_PARP-1_T-CELL_STIMULATION-ANTI-CD3-MAB_DIFF	PARP-1 dependent genes in T cells upon stimulation with anti-CD3. Table listing the PARP-1 dependent genes in T cells upon stimulation with anti-CD3 mAb alone. (Table S3; Pubmed:18412984)
MIRNA_MM_WANG_MMU-MIR-138-5P	WANG_MMU-MIR-138-5P; Prediction of both conserved and nonconserved microRNA targets in animals 2008.
TFACTS_MM_SP3	Target genes of transcription factor SP3, predicted by TFactS, data from GeneSetDB.
MSIGDB_MM_ICHIBA_GRAFT_VERSUS_HOST_DISEASE_35D_UP	Hepatic graft versus host disease (GVHD), day 35: genes up-regulated in allogeneic vs syngeneic bone marrow transplant.
LIT_MM_LIN_HAIR-CYCLE_TIME-COURSE_C2_1ST-HAIR-GROWTH-CYCLE_DIFF	1st-cluster2_Time-course profile clustering of hair-cycle regulated genes. (Table S1; Pubmed:19629164)
LIT_MM_GU_ENRICHED-MATURE-ISLETS_VS_PANCREATIC-TISSUE-EARLY_DIFF	1d: genes enriched in mature islets versus pancreatic tissue of early stages (Table S1; Pubmed:14660441)
MIRNA_MM_WANG_MMU-MIR-1930-3P	WANG_MMU-MIR-1930-3P; Prediction of both conserved and nonconserved microRNA targets in animals 2008.
LIT_MM_ULLOA-MONTOYA_MAPC-ESC_NS_UP	Genes expressed in MAPC and ESC at least two fold higher than NS (Table S5; Pubmed:17683608)
LIT_MM_LACAZE_TRAF1_IFN_VS_RISCFREE_IFN_RNAI_DN	DN Traf1_IFN+ vs. Riscfree_IFN+,RNAi gene expression clusters (Addi. file 8; Pubmed:19664281)
MICROCOSM_TARGETS_MM_HSA-MIR-577	hsa-miR-577 from MicroCosm Targets, data from GeneSetDB.
LIT_MM_WAN_TG_NTG_GV-OOCYTE_TRANSCRIPT_DN	DN_Transcripts misregulated by more than twofold (Table S1; Pubmed:18614575)
LIT_MM_XU-CNS_CALORIC-RESTRICT_16M_DIFF	CR responsive gene lists of 16M mouse CNS (Table S4a-16M; Pubmed:17988385)
LIT_MM_RENTHAL_FOSB-TARGET-GENE_COCAINE_DIFF	?FosB target genes in chronic cocaine-treated mice (Table S6; Pubmed:19447090)
SIDER_MM_LYMPHOPENIA	Lymphopenia from SIDER (SIDe Effect Resource), data from GeneSetDB.
MIRNA_MM_WANG_MMU-MIR-26B-3P	WANG_MMU-MIR-26B-3P; Prediction of both conserved and nonconserved microRNA targets in animals 2008.
MIRNA_MM_WANG_MMU-MIR-1A-1-5P	WANG_MMU-MIR-1A-1-5P; Prediction of both conserved and nonconserved microRNA targets in animals 2008.
STITCH_MM_PD98059-CID000004713	PD98059(CID000004713) from STITCH (Search Tool for Interactions of Chemicals), data from GeneSetDB.
LIT_MM_MOSCHELLA_SPLEEN_CTX_1-2D_UP	UP_List of the genes modulated 1-2 days after CTX in the spleen (Table S2; Pubmed:21444678)
STITCH_MM_PD98059-CID100004713	PD98059(CID100004713) from STITCH (Search Tool for Interactions of Chemicals), data from GeneSetDB.
LIT_MM_SCHRIMPE_35-?M-HNE_6H_DN	Selected Genes Down-Regulated by 35 ?M HNE at 6 ha (Table S2; Pubmed:19191707)
LIT_MM_ATTANASIO_GLIS2-MUTANT_KIDNEY_UP	up-differentially expressed in Glis2 mutant kidneys (Table S1; Pubmed:17618285)
LIT_MM_INFANTE_E2F2_KO_0H_DN	E2F2 KO 0h Down (Table S1; Pubmed:19066456)
LIT_MM_DEEB_C3-1_TAG_MAMMARY_TUMOR-SPECIFIC_DIFF	C3(1)-Tag Mammary Tumor-specific Genes (Table S3(Sl Info Table 1); Pubmed:17804718)
LIT_MM_WU_ADUSF1_TRANSCRIPTS_MALE_DIFF	Male Female and Male AdUSF1 differentially expressed transcripts (Table S2; Pubmed:19995791)
LIT_MM_MCINTYRE_EMX2_VS_EMX2_DN	DN_Transcript clusters that differed significantly between Emx2-/- and Emx2+/+ mice (Table S1; Pubmed:18854508)
MSIGDB_MM_LIAN_LIPA_TARGETS_6M	Genes up-regulated at 6 months of age in lungs from LIPA [GeneID=3988] knockout mice, which display pulmonary pathology.
LIT_MM_GEBEL_CS-EXPOSURE_2M_UP	UP wt 2 m,the strong impact of CS(Cigarette Smoke) exposure on the transcriptome of rodent lung tissue cells (Table S1; Pubmed:20133372)
STITCH_MM_LYSOPHOSPHATIDIC_ACID-CID100003987	lysophosphatidic acid(CID100003987) from STITCH (Search Tool for Interactions of Chemicals), data from GeneSetDB.
LIT_MM_LECUIT_L-MONOCYTOGENE_GERM-FREE-B-THETAIOTAOMICRON-L-INNOCUA_UP	Six hundred fifty-five probe set representinga 614 genes exhibiting higher expression in L. monocytogenesinfected (Lm) mice compared to uninfected (germ-free, GF; B. thetaiotaomicron-colonized, Bt; L. innocua-colonized, Li) control groups (Table S2; Pubmed:17389602)
SIDER_MM_ULCER	Ulcer from SIDER (SIDe Effect Resource), data from GeneSetDB.
MIRNA_MM_WANG_MMU-MIR-290-5P	WANG_MMU-MIR-290-5P; Prediction of both conserved and nonconserved microRNA targets in animals 2008.
LIT_MM_LOPEZ_BRM2_UP	up-BRM2 vs Control (Table S1; Pubmed:19749746)
LIT_MM_FREILICH_FUNCTIONAL-REGULATE-TRANSCRIPTION_DIFF	the functional assignments of the proteins used in the analysis--proteins that regulate transcription (Table S1; Pubmed:15998445)
LIT_MM_NISHIYAMA_TF-MSC_ES-CELL_UP	Msc Genes up-regulated or down-regulated >=2 fold in response to manipulation of transcription factors (Table S3; Pubmed:19796622)
LIT_MM_BREDEMEYER_RAG-DSBS_ATM-DEPEND_NF?B-INDEPEND_DIFF	Genes that are significantly differentially regulated in response to Rag DSBs that are Atm dependent, but independent of NF?B activation (Table S2; Pubmed:18849970)
MIRNA_MM_WANG_MMU-MIR-1198-5P	WANG_MMU-MIR-1198-5P; Prediction of both conserved and nonconserved microRNA targets in animals 2008.
MIRNA_MM_WANG_MMU-MIR-486-3P	WANG_MMU-MIR-486-3P; Prediction of both conserved and nonconserved microRNA targets in animals 2008.
STITCH_MM_SUPEROXIDE-CID100520535	superoxide(CID100520535) from STITCH (Search Tool for Interactions of Chemicals), data from GeneSetDB.
MIRNA_MM_WANG_MMU-MIR-3082-5P	WANG_MMU-MIR-3082-5P; Prediction of both conserved and nonconserved microRNA targets in animals 2008.
STITCH_MM_MELATONIN-CID100000896	melatonin(CID100000896) from STITCH (Search Tool for Interactions of Chemicals), data from GeneSetDB.
CTD_MM_SB_203580	SB 203580 from CTD (Comparative Toxicogenomics Database), data from GeneSetDB.
LIT_MM_KAWAZU_C57BL_6_DN-THYMOCYTE-DEVELOP_C3_DN2-DN3_DN4_UP	c_Clustering of differentially expressed genes during DN thymocyte development (Table S1; Pubmed:17911620)
LIT_MM_BOSCH_INTESTINAL-DETOXIFICATION-ENZYME_24H_DIFF	Expression of intestinal detoxification enzymes after a 24 hour fasting period (Additional file 2; Pubmed:17683626)
LIT_MM_GARCIA-ORTIZ_FETAL-OVARY_FOXL2-NULL_UP	Up in Foxl2-null (Additional file 8B; Pubmed:19538736)
LIT_MM_DERBINSKI_AIRE-CD80HI_VS_AIRE-CD80LO-MTEC_DIFF	Complete listing of genes overexpressed in the Aire-/- CD80hi subset of mTECs compared with Aire-/- CD80lo mTECs (Table S3; Pubmed:15983066)
GO_BP_MM_INFLAMMATORY_RESPONSE	GO:0006954 ; GO Term Name: inflammatory response ; GO domain: biological_process ; GO Evidence Code: IEA
LIT_MM_HIDVEGI_LIVER_HEPATOCYTE_ATZ-ACCUMULATION_DN	DN_Complete list of significant changes in gene expression (Table S1; Pubmed:17635928)
MPO_MM_DECREASED_IGG_LEVEL	decreased IgG level from MPO (Mammalian Phenotype Ontology), data from GeneSetDB.
SIDER_MM_COUGH_INCREASED	Cough increased from SIDER (SIDe Effect Resource), data from GeneSetDB.
LIT_MM_KOZICZAK-HOLBRO_LPS_IRAK4-KD_CIII_DIFF	LPS responsive genes belonging to cluster III (moderately different induction in wild-type and IRAK-4 kinase dead cells). (Table S3; Pubmed:18266302)
LIT_MM_KAFTANOVSKAYA_TG-SHRXFP2_RXFP2_CREMASTERIC-SAC_UP	UP_Genes misregulated in the Tg(shRxfp2), Rxfp2+/- cryptorchid cremasteric sac versus the wild-type Rxfp2+/-cremasteric sac (Table S1; Pubmed:21147849)
LIT_MM_LABBE_WS_EMBRYONIC-FIBROBLASTS_UP	UP Differential expression profile between wild type and Wrn helicase mutant mouse embryonic fibroblasts (Addi. file 5; Pubmed:20175907)
LIT_MM_TANG_BCL11B-STHDH-STRIATAL_MOCK-TRANSFECT_UP	UP_List of genes differentially expressed in Bcl11b-transfected STHdh striatal cells compared to mock (pcDNA3.1)-transfected cells (Table S1; Pubmed:21912641)
LIT_MM_ZHOU_DICER-KO_DICER-HET_T-REG-CELL_UP	UP_Gene profiling of Dicer KO versus Dicer Het T reg cells (Table S1; Pubmed:18725525)
LIT_MM_HARIBHAI_ITREG_A_DN	DN Differential gene expression between iTreg and activated nTreg cell preparations (n=5 and 3, respectively) (Table S4; Pubmed:19265124)
LIT_MM_WU_TNBS-INDUCED_COLITIS_UP	up-Genes differentially expressed in TNBS-induced colitis (Table 1; Pubmed:17982090)
STITCH_MM_NOREPINEPHRINE-CID100000951	norepinephrine(CID100000951) from STITCH (Search Tool for Interactions of Chemicals), data from GeneSetDB.
MIRNA_MM_WANG_MMU-MIR-703	WANG_MMU-MIR-703; Prediction of both conserved and nonconserved microRNA targets in animals 2008.
LIT_MM_LIN_HAIR-CYCLE_TIME-COURSE_C2_2ND-DEPILATION-INDUCED-HAIR-GROWTH-CYCLE_DIFF	2nd-cluster2_Time-course profile clustering of hair-cycle regulated genes. (Table S1; Pubmed:19629164)
LIT_MM_KIM_ALB-CRE-HIF1DPA_VS_ALB-CRE-HIF2DPA_LIVER_UP	top 200 genes overexpressed in Alb-Cre:HIF1dPA relative to Alb-Cre:HIF2dPA (Table S1; Pubmed:16977322)
LIT_MM_KWON_IL-21_STAT3-BINDING-SITE-NEARBY_CD4-T-CELL_DIFF	Genes Regulated by IL21 with a STAT3-Binding Site Nearby (Table S4; Pubmed:20064451)
CTD_MM_DAUNORUBICIN	Daunorubicin from CTD (Comparative Toxicogenomics Database), data from GeneSetDB.
REACTOME_MM_DKFZP666O0110_PATHWAY	Genes that interact with the gene DKFZP666O0110, which was extracted from FIsInGene_Pathway_041709 in the REACTOME.
SIDER_MM_HYPOMAGNESAEMIA	Hypomagnesaemia from SIDER (SIDe Effect Resource), data from GeneSetDB.
LIT_MM_MOULOS_MOIL_24H_DMSO_DN	DN Moil_24h/DMSO List of 925 differentially expressed genes in response to mastic oil. The list of 925 differentially expressed genes and their cluster memberships as derived after statistical and clustering analysis as described in Methods. Several annotation elements such as GenBank accession numbers and RefSeq IDs are included together with fold change ratios for each differentially expressed …
LIT_MM_BLOMBERG_ITK-ANTI-CD3_ITK-ANTI-CD3_CD28_CD3-T-CELL_UP	UP_252 differentially expressed probe-set in Itk-deficiency compared to Wt after anti-CD3- and anti-CD3/CD28-stimulations of CD3? T-cells (Additional file 4; Pubmed:19450280)
MIRNA_MM_WANG_MMU-MIR-326-5P	WANG_MMU-MIR-326-5P; Prediction of both conserved and nonconserved microRNA targets in animals 2008.
SIDER_MM_HYPERSENSITIVITY	Hypersensitivity from SIDER (SIDe Effect Resource), data from GeneSetDB.
MIRNA_MM_BETEL_MMU-MIR-1937C	BETEL_MMU-MIR-1937C; Good mirSVR score Non-conserved; The microRNA.org resource: targets and expression.
STITCH_MM_HISTAMINE-CID100000774	histamine(CID100000774) from STITCH (Search Tool for Interactions of Chemicals), data from GeneSetDB.
LIT_MM_DIWAN_NIXSPLEEN_DN	Annotated list of dis-enriched Nix-spleen transcripts corresponding to functional clusters in Fig. 5a (Table S4; Pubmed:17420462)
LIT_MM_FRIJTERS_PREDNISOLONE_VEHICLE_UP	UP Differentially regulated probe sets in liver of prednisolone-treated versus vehicle-treated wild type mice (Addi. file 1; Pubmed:20525385)
LIT_MM_RABANI_DENDRITIC-CELL_LPS_DIFF	254 representative signature genes along a high-resolution time course during the response of dendritic cells to LPS(lipopolysaccharide) (Table S1; Pubmed:21516085)
MIRNA_MM_WANG_MMU-MIR-18B-5P	WANG_MMU-MIR-18B-5P; Prediction of both conserved and nonconserved microRNA targets in animals 2008.
MIRNA_MM_BETEL_MMU-MIR-673-3P	BETEL_MMU-MIR-673-3P; Good mirSVR score Non-conserved; The microRNA.org resource: targets and expression.
LIT_MM_YE_RECS-CO-CULTURED-CONTROL-293-CELL-RECS-CO-CULTURED-NORRIN-EXPRESSING-293-CELL_ENDOTHELIAL-CELL_DIFF	Micro-array hybridization data for independent triplicate samples from WT and Fz4?/? RECs co-cultured with control 293 cells or with Norrin-expressing 293 cells (12 samples total). Values are listed for those probe sets for which the WT RECs co-cultured with control 293 cells vs. WT RECs co-cultured with Norrin-expressing 293 cells showed a fold change greater than 2 and a P-value less than 0.01 …
LIT_MM_XU-CNS_CALORIC-RESTRICT_24M_DIFF	CR responsive gene lists of 24M mouse CNS (Table S4a-24M; Pubmed:17988385)
LIT_MM_YANG_CD4-TSC1_TCR_4H_DIFF	342 probe sets with ?2?fold difference in CD4 Tsc1??vs WT cells after 4 h TCR stimulation (Table S2; Pubmed:21765414)
REACTOME_MM_GRB2_PATHWAY	Genes that interact with the gene GRB2, which was extracted from FIsInGene_Pathway_041709 in the REACTOME.
LIT_MM_LEE_HOXB4_GFP_UP	UP RNA expression profiling results - RNA expression profiling results comparing KLS-EML-B4 cells to KLS-EML-GFP cells. 465 gene transcripts were observed to be differentially expressed by at least 2-fold (Table S1; Pubmed:20404135)
HPO_MM_ABNORMALITY_OF_ACID-BASE_HOMEOSTASIS	Abnormality of acid-base homeostasis from HPO (Human Phenotype Ontology), data from GeneSetDB.
CTD_MM_TROGLITAZONE	troglitazone from CTD (Comparative Toxicogenomics Database), data from GeneSetDB.
MIRNA_MM_WANG_MMU-MIR-5113	WANG_MMU-MIR-5113; Prediction of both conserved and nonconserved microRNA targets in animals 2008.
LIT_MM_MASCARENHAS_WA-GFP_DN	WA-GFP down (Table S1; Pubmed:19794138)
LIT_MM_GERRITS_PRINCIPAL-EQTL_ERYTHROID-SPECIFIC-EQTLS_DIFF	Erythroid-specific eQTLs Principal eQTL categories (Table S2; Pubmed:19834560)
LIT_MM_SHI_HIF1ALPHA_TH17-CELL_DN	DN_581 probe sets with a difference greater than or equal to twofold and false discovery rate <0.05 in HIF1-a-deficient versus wild type comparison (Table S1; Pubmed:21708926)
STITCH_MM_PROSTAGLANDIN_E1-CID100000214	prostaglandin E1(CID100000214) from STITCH (Search Tool for Interactions of Chemicals), data from GeneSetDB.
LIT_MM_AUFFRAY_CX3CR1GFP_LISTERIA-MONOCYTOGENE_8H_2H_UNINFECTED_DIFF	Analysis of differential gene expression on purified CD11b+ Gr1-NK1.1- B220-, TCRb-, F4/80int, GFPhigh monocytes. (Figure S6; Pubmed:17673663)
LIT_MM_PINENT_HSL_WAT_DN	down-HSL-WAT (Table S1; Pubmed:18572100)
LIT_MM_BRUNSKILL_DB_GLOMERULAR-ENDOTHELIAL-CELL_DN	DN List of 267 genes with over 1.5 fold change in gene expression level in db/db glomerular endothelial cells, compared to wild type (Suppl. Data S10; Pubmed:20706631)
INOH_MM_PURINE_NUCLEOTIDES_NUCLEOSIDES_METABOLISM	Purine nucleotides nucleosides metabolism from INOH (Integrating Network Objects with Hierarchies), data from GeneSetDB.
STITCH_MM_HISTAMINE-CID000000774	histamine(CID000000774) from STITCH (Search Tool for Interactions of Chemicals), data from GeneSetDB.
GO_BP_MM_INNATE_IMMUNE_RESPONSE	GO:0045087 ; GO Term Name: innate immune response ; GO domain: biological_process ; GO Evidence Code: IEA
STITCH_MM_P-38-CID100200878	p-38(CID100200878) from STITCH (Search Tool for Interactions of Chemicals), data from GeneSetDB.
LIT_MM_VASSENA_SCNT_VS_FERTILIZED-EMBRYOS_2-STAGE_UP	up-Transcripts with elevated expression (two-fold or greater, P<0.01) in SCNT embryos compared to fertilized embryos at the two-cell stage, as revealed by microarray analysis (Table S4; Pubmed:17234177)
MICROCOSM_TARGETS_MM_HSA-MIR-122	hsa-miR-122 from MicroCosm Targets, data from GeneSetDB.
GO_MF_MM_IDENTICAL_PROTEIN_BINDING	GO:0042802 ; GO Term Name: identical protein binding ; GO domain: molecular_function ; GO Evidence Code: IEA
LIT_MM_RONG_A-J_VS_B6_RESULT-SS2-INFECTION_DN	down- differential genes between A/J and B6 as a result of SS2 infection(the inherently differential gene has been excluded) (Table S1; Pubmed:22384161)
LIT_MM_CHAHROUR_MECP2-NULL_HYPOTHALAMI_DN	DN_The list of genes specifically misregulated in Mecp2-null hypothalami (Table S6; Pubmed:18511691)
GO_BP_MM_RESPONSE_TO_HYPOXIA	GO:0001666 ; GO Term Name: response to hypoxia ; GO domain: biological_process ; GO Evidence Code: IDA
MIRNA_MM_WANG_MMU-MIR-140-5P	WANG_MMU-MIR-140-5P; Prediction of both conserved and nonconserved microRNA targets in animals 2008.
LIT_MM_FRERICKS_AHR_CD4-T-CELL_DIFF	Up- and down-regulation of transcripts in CD4 T cells of AHR-deficient mice (Figure 5; Pubmed:16972790)
LIT_MM_BRUNSKILL_DBGLOM_GLOMWT_ENDOTHELIAL-CELL_UP	UP [dbglom] vs [glomwt]Differentially expressed endothelial genes. 786 genes with most distinct expression patterns across all endothelial cell samples (Suppl. Data S1; Pubmed:20706631)
STITCH_MM_FLAVIN_ADENINE_DINUCLEOTIDE-CID100000703	flavin adenine dinucleotide(CID100000703) from STITCH (Search Tool for Interactions of Chemicals), data from GeneSetDB.
EHMN_MM_PURINE_METABOLISM	Purine_metabolism from EHMN (Edinburgh Human Metabolic Network), data from GeneSetDB.
LIT_MM_GILCHRIST_C10_TLR-ACTIVATED-MACROPHAGE_ATF3_DIFF	k-means cluster 10 from LPS stimulated macrophages--Here we use cluster analysis of a comprehensive set of transcriptomic data derived from Toll-like receptor (TLR)-activated macrophages to identify a prominent group of genes that appear to be regulated by activating transcription factor 3 (ATF3), a member of the CREB/ATF family of transcription factors. (Table S4; Pubmed:16688168)
SIDER_MM_SWEATING_INCREASED	Sweating increased from SIDER (SIDe Effect Resource), data from GeneSetDB.
LIT_MM_SAENZ_PARP-1-TCELL_STIMULATION-ANTI-CD3-MAB_ANTI-CD28-MAB_DIFF	PARP-1 dependent genes in T cells upon stimulation with anti-CD3 in the presence of co-stimulation. Table listing the PARP-1 dependent genes in T cells upon stimulation with anti-CD3 mAb in combination with anti-CD28 mAb (Table S4; Pubmed:18412984)
LIT_MM_CHEN_MACROPHAGE-ENRICHED-NETWORK_TABLE2-ANNOTATION-SET_OVERLAP_DIFF	Genes in the MEM network overlapping the gene annotation set described in Table 2 of the main text. (Table S4; Pubmed:18344982)
MPO_MM_PARTIAL_NEONATAL_LETHALITY	partial neonatal lethality from MPO (Mammalian Phenotype Ontology), data from GeneSetDB.
KEGG_MM_PURINE_METABOLISM	Purine metabolism http://www.genome.jp/kegg-bin/show_pathway?mmu00230
LIT_MM_GILLICH_DAY2_LIF-STAT3_UP	genes up_day 2 in LIF-Stat3 (Table S3; Pubmed:22482507)
HPO_MM_ABNORMALITY_OF_THE_OPTIC_NERVE	Abnormality of the optic nerve from HPO (Human Phenotype Ontology), data from GeneSetDB.
LIT_MM_SOKOLOVIC_LIVER_FASTING_24H_UP	24h_UP_Fold changes in liver response to fasting (Additional File 2; Pubmed:18990241)
GO_BP_MM_OXIDATION-REDUCTION_PROCESS	GO:0055114 ; GO Term Name: oxidation-reduction process ; GO domain: biological_process ; GO Evidence Code: IEA
CTD_MM_ALITRETINOIN	alitretinoin from CTD (Comparative Toxicogenomics Database), data from GeneSetDB.
STITCH_MM_PROSTAGLANDIN_E1-CID005280723	prostaglandin E1(CID005280723) from STITCH (Search Tool for Interactions of Chemicals), data from GeneSetDB.
MIRNA_MM_WANG_MMU-MIR-1896	WANG_MMU-MIR-1896; Prediction of both conserved and nonconserved microRNA targets in animals 2008.
LIT_MM_PINENT_HSL_SM_UP	up-HSL_SM (Table S1; Pubmed:18572100)
LIT_MM_CRAWFORD_E18.5_1.5FOLD_PANCREATIC-ISLET_UP	up-Transcripts up-regulated by 1.5-fold or greater at e18.5. (Table S2B; Pubmed:18297134)
MIRNA_MM_WANG_MMU-MIR-292-5P	WANG_MMU-MIR-292-5P; Prediction of both conserved and nonconserved microRNA targets in animals 2008.
MIRNA_MM_WANG_MMU-MIR-3068-5P	WANG_MMU-MIR-3068-5P; Prediction of both conserved and nonconserved microRNA targets in animals 2008.
LIT_MM_RAMOS_CD8-CELL_UP	Genes with increased expression in CD8 cells-Differentially expressed genes between side population (SP) cells and CD8 T lymphocytes (Table S1; Pubmed:17009876)
STITCH_MM_FLAVIN_ADENINE_DINUCLEOTIDE-CID000643975	flavin adenine dinucleotide(CID000643975) from STITCH (Search Tool for Interactions of Chemicals), data from GeneSetDB.
STITCH_MM_ESTROGEN-CID100003054	estrogen(CID100003054) from STITCH (Search Tool for Interactions of Chemicals), data from GeneSetDB.
LIT_MM_SANDA_NOTCH1_T-ALL_LEUKEMIC_POLYCLONAL_DPCELL_G8_DN	group8_Differentially expressed genes in a Notch1-induced mouse model of T-ALL (Table S2; Pubmed:20007543)
LIT_MM_MITIKU_POSTIMPLANTATION-EMBRYOGENEIS_E8.0B-E8.5A_DN	E8.0b-E8.5a_Genes Decreasing more than 3-fold on each Interval (Table S3; Pubmed:18061570)
GO_CC_MM_NUCLEOLUS	GO:0005730 ; GO Term Name: nucleolus ; GO domain: cellular_component ; GO Evidence Code: IEA
STITCH_MM_ADENOSINE_MONOPHOSPHATE-CID000006083	adenosine monophosphate(CID000006083) from STITCH (Search Tool for Interactions of Chemicals), data from GeneSetDB.
LIT_MM_SWIFT_BETA1ARG389_NTG_HEART_UP	UP_Gene Changes Unique to Arg hearts (Table S3; Pubmed:18664629)
STITCH_MM_GUANYLATE-CID000006804	guanylate(CID000006804) from STITCH (Search Tool for Interactions of Chemicals), data from GeneSetDB.
LIT_MM_ANKO_SRP20-KNOCKDOWN_UP	Upregulated in SRp20 knockdown (control down) (Table S5; Pubmed:20639886)
MSIGDB_MM_WAKABAYASHI_ADIPOGENESIS_PPARG_BOUND_8D	Genes with promoters bound by PPARG [GeneID=5468] at 8 day time point of adipocyte differentiation of 3T3-L1 cells (preadipocyte).
STITCH_MM_CYCLOHEXIMIDE-CID100002900	cycloheximide(CID100002900) from STITCH (Search Tool for Interactions of Chemicals), data from GeneSetDB.
MPO_MM_DECREASED_CIRCULATING_INSULIN_LEVEL	decreased circulating insulin level from MPO (Mammalian Phenotype Ontology), data from GeneSetDB.
MIRNA_MM_GRIMSON_MIR-494	GRIMSON_MIR-494; Predicted_Targets_Info; MicroRNA Targeting Specificity in Mammals: Determinants beyond Seed Pairing.
GO_CC_MM_CELL_SURFACE	GO:0009986 ; GO Term Name: cell surface ; GO domain: cellular_component ; GO Evidence Code: ISS
STITCH_MM_ADENOSINE_MONOPHOSPHATE-CID100000224	adenosine monophosphate(CID100000224) from STITCH (Search Tool for Interactions of Chemicals), data from GeneSetDB.
LIT_MM_HUTTMANN_ST-HSC_UP	induced ST-HSC (Table S2; Pubmed:16574753)
STITCH_MM_SB203580-CID100176155	SB203580(CID100176155) from STITCH (Search Tool for Interactions of Chemicals), data from GeneSetDB.
LIT_MM_BRIDGEWATER_KIDNEY_B-CATENIN-DEFICIENT-MUTANT_UP	Transcripts up-regulated in kidneys from B-catenin deficient mutant mice (Table S1; Pubmed:18358465)
LIT_MM_XU_STAT3_DN	DN_Genes Differentially Expressed in Stat3?/?Mice (Additional file 1; Pubmed:18070348)
REACTOME_MM_BCAR1_PATHWAY	Genes that interact with the gene BCAR1, which was extracted from FIsInGene_Pathway_041709 in the REACTOME.
LIT_MM_HOLL_TCFAP2C_HEPATOCYTE_DN	DN_Tcfap2c deregulated genes in hepatocyte culture (Table S6; Pubmed:21779369)
LIT_MM_BRUNSKILL_DBGLOM_MED_ENDOTHELIAL-CELL_UP	UP [dbglom] vs [med]Differentially expressed endothelial genes. 786 genes with most distinct expression patterns across all endothelial cell samples (Suppl. Data S1; Pubmed:20706631)
SIDER_MM_KIDNEY_FUNCTION_ABNORMAL	Kidney function abnormal from SIDER (SIDe Effect Resource), data from GeneSetDB.
LIT_MM_CERNETICH_IMMUNE_INTACT-MALE_VS_INTACT-FEMALE_INFECTION-P-CHABAUDI_DIFF	Genes that encode for immune-related proteins and that are differentially expressed between intact males (IM) and intact females (IF) during infection with P. chabaudi (Table S1; Pubmed:16714546)
LIT_MM_FICARA_ST-HSC_LT-HSC_DN	Genes down-regulated in ST-HSC compared to LT-HSC (Supplement 4-Table S3; Pubmed:18462698)
LIT_MM_GERRITS_DYNAMIC-EQTLS_DIFF	All dynamic eQTLs (Table S3; Pubmed:19834560)
HPO_MM_VOMITING	Vomiting from HPO (Human Phenotype Ontology), data from GeneSetDB.
SIDER_MM_HYPOAESTHESIA	Hypoaesthesia from SIDER (SIDe Effect Resource), data from GeneSetDB.
LIT_MM_CHAUSIAUX_3D_HPG_TESTIS_UP	up-deregulated at day 3 in the hpg mouse testis compared to the age matched WT testis (Table S1; Pubmed:17671269)
STITCH_MM_CYCLOHEXIMIDE-CID000006197	cycloheximide(CID000006197) from STITCH (Search Tool for Interactions of Chemicals), data from GeneSetDB.
LIT_MM_DIRSCHERL_LUTEOLINN-LPS_LPS_24H_BV-2-CELL_DN	DN Differentially expressed transcripts after 24 h stimulation with 50 ?M luteolin + 50 ng/ml LPS versus 50 ng/ml LPS (Table 3 ; Pubmed:20074346)
STITCH_MM_GUANYLATE-CID100000761	guanylate(CID100000761) from STITCH (Search Tool for Interactions of Chemicals), data from GeneSetDB.
LIT_MM_ZENG_MATERNAL_PREIMPLANTATION_DIFF	Genes with maternal expression profile (Table S2-A; Pubmed:15282163)
LIT_MM_KUCZMA_SCURFY_DIFF	Sf/WT_Transcriptional profile of Foxp3-deficient and sufficient Treg cells. (Supp Material; Pubmed:19710455)
LIT_MM_IDA_AGE_RPE_VS_CHOROID_DIFF	Genes that are differentially expressed with age (Table S1; Pubmed:14519767)
MPO_MM_DECREASED_SUSCEPTIBILITY_TO_EXPERIMENTAL_AUTOIMMUNE_ENCEPHALOMYELITIS	decreased susceptibility to experimental autoimmune encephalomyelitis from MPO (Mammalian Phenotype Ontology), data from GeneSetDB.
SIDER_MM_SHOCK	Shock from SIDER (SIDe Effect Resource), data from GeneSetDB.
LIT_MM_IVANOVA_NANOG-SHRNA-TIME-COURSE-ONLY_DN	down-regulated during the Nanog shRNA time-course only. (Table S21; Pubmed:16767105)
MIRNA_MM_WANG_MMU-MIR-18A-5P	WANG_MMU-MIR-18A-5P; Prediction of both conserved and nonconserved microRNA targets in animals 2008.
MIRNA_MM_WANG_MMU-MIR-327	WANG_MMU-MIR-327; Prediction of both conserved and nonconserved microRNA targets in animals 2008.
MICROCOSM_TARGETS_MM_HSA-MIR-340	hsa-miR-340 from MicroCosm Targets, data from GeneSetDB.
LIT_MM_KANFI_SIRTUIN_SIRT6_LIFESPAN_FEMALE_VS_MALE_UP	up-genes significantly changed between female WT vs. male WT (Table S2; Pubmed:22367546)
LIT_MM_HAMATANI_YOUNG_VS_AGED-OOCYTE_UP	up--Fold Change (Young/Aged oocytes) (Table S1; Pubmed:15317747)
CTD_MM_DIETARY_CARBOHYDRATES	Dietary Carbohydrates from CTD (Comparative Toxicogenomics Database), data from GeneSetDB.
LIT_MM_TRIMBOLI_FSP_CRE_PTENLOXP_LOXP_VS_PTENLOXP_LOXP_PMSC_UP	Pten-responsive genes upregulated more than fourfold in the Fsp cre;PtenloxP/loxP vs. PtenloxP/loxP primary mammary stromal cells (Table S1; Pubmed:19847259)
LIT_MM_GLEZER_MOE430A_IPSILATERAL-LPS_VS_RU486-LPS_DIFF	MOE430A with significant Ipsilateral (LPS/RU486 - LPS) contrast (Table S2; Pubmed:17375196)
HPO_MM_HYPERREFLEXIA	Hyperreflexia from HPO (Human Phenotype Ontology), data from GeneSetDB.
LIT_MM_ROBBINS_LEUKOCYTE-POPULATION_DIFF	Specific transcriptomic signatures identified in the leukocyte populations studied (Table 4; Pubmed:18218067)
LIT_MM_AMADOR-NOGUEZ_AMES-DWARF-MICE-MUTANT_DIFF	Genes Differentially Expressed in Ames Dwarf Mice, Mutant vs Wildtype (Table S1; Pubmed:15569359)
STITCH_MM_GUANINE-CID000000764	guanine(CID000000764) from STITCH (Search Tool for Interactions of Chemicals), data from GeneSetDB.
LIT_MM_ESCUDERO_POTENTIAL-FOXL2-TARGET-GENE-VALIDATED_DIFF	Potential Foxl2 target genes validated by comparison to data from other microarray studies (Addi. File 10; Pubmed:20167115)
KEGG_MM_METABOLIC_PATHWAYS	Metabolic pathways http://www.genome.jp/kegg-bin/show_pathway?mmu01100
LIT_MM_HU_NSO_COMMON-TARGET_DIFF	GO analysis (Ingenuity Pathway Analysis) of common target genes of Nanogox2ct4(NSO) (Table S4; Pubmed:19339689)
MPO_MM_DECREASED_SURVIVOR_RATE	decreased survivor rate from MPO (Mammalian Phenotype Ontology), data from GeneSetDB.
MICROCOSM_TARGETS_MM_HSA-MIR-183	hsa-miR-183 from MicroCosm Targets, data from GeneSetDB.
MPO_MM_DECREASED_CD8-POSITIVE_T_CELL_NUMBER	decreased CD8-positive T cell number from MPO (Mammalian Phenotype Ontology), data from GeneSetDB.
LIT_MM_CAIAZZO_16-DIV-IDA_A9-A10-MESENCEPHALIC-DA-NEURON_DIFF	List of all genes differentially expressed (> 5 fold change) between 16 DIV iDA cells and A9 and A10 mesencephalic DA neurons. (Table S3; Pubmed:21725324)
LIT_MM_BENITO_FORSKOLIN_UP	up-Forskolin-regulated transcription (Table A2; Pubmed:22171029)
SIDER_MM_HYPERTENSION	Hypertension from SIDER (SIDe Effect Resource), data from GeneSetDB.
STITCH_MM_UDP-GLUCOSE-CID100001166	UDP-glucose(CID100001166) from STITCH (Search Tool for Interactions of Chemicals), data from GeneSetDB.
MSIGDB_MM_ZHENG_FOXP3_TARGETS_IN_THYMUS_UP	Genes with promoters bound by FOXP3 [GeneID=50943] and which are up-regulated only in developing (located in the thymus) regulatory CD4+ [GeneID=920] T lymphocytes.
LIT_MM_HARTMAN_ONTOLOGY-GROUP_AD-INFECTION_MEF_GT-3FOLD_UP	Significantly (>3 fold) upregulated Gene Ontology Groups after Ad infection in MEFs (Table S3; Pubmed:17027060)
LIT_MM_ULICI_1.4-FC-I-LTII_1.4-FC-D-GT-LY_UD_LY294002_TIBIAE_UP	Genes found in the intersection of 1.4-fold change I<II and 1.4-fold change D>LY with UD enriched in DMSO (Table S5 ; Pubmed:20111593)
LIT_MM_ASP_MYOTUBE_H3K27ME3_MYH-LOCI_CLUSTER3_DN	cluster3_Permanently repressed genes (Dataset S1; Pubmed:21551099)
LIT_MM_SELMAN_LIVER_S6K_DN	downregulated in liver of S6K-/- mice compared to wild type mice (Table S2b; Pubmed:19797661)
MPO_MM_ABNORMAL_CELL_PHYSIOLOGY	abnormal cell physiology from MPO (Mammalian Phenotype Ontology), data from GeneSetDB.
LIT_MM_SHIN_MYD88TRIFLP02_VS_LP03_DOT_ICM-DEPEND_UP	UP_Genes that exhibit two-fold or greater Dot/Icm-dependent transcriptional changes in Myd88?/?Trif?/? macrophages but not in Myd88?/?Rip2?/? macrophages. (Table S3; Pubmed:19043549)
MIRNA_MM_WANG_MMU-MIR-370-5P	WANG_MMU-MIR-370-5P; Prediction of both conserved and nonconserved microRNA targets in animals 2008.
LIT_MM_WILDE_HF-FEEDING_28D_DN	DN_Significantly changed genes (fold change > 1.3 and a raw p-value < 0.05) after 28 days of HF-feeding (Table S1-Table2; Pubmed:18042831)
MIRNA_MM_WANG_MMU-MIR-448-3P	WANG_MMU-MIR-448-3P; Prediction of both conserved and nonconserved microRNA targets in animals 2008.
LIT_MM_BRUNSKILL_ENDO_MED_ENDOTHELIAL-CELL_UP	UP [endo] vs [med]Differentially expressed endothelial genes. 786 genes with most distinct expression patterns across all endothelial cell samples (Suppl. Data S1; Pubmed:20706631)
LIT_MM_CRAWFORD_E18.5_PANCREATIC-ISLET_UP	up-Statistically significant (p < 0.05) transcripts up-regulated at e18.5. (Table S1B; Pubmed:18297134)
LIT_MM_LACAZE_CT2A_IFN-RISCFREE_IFN_RNAI_DN	DN CT2a_IFN- vs. Riscfree_IFN-,RNAi gene expression clusters (Addi. file 8; Pubmed:19664281)
SIDER_MM_NERVOUS_SYSTEM_DISORDER	Nervous system disorder from SIDER (SIDe Effect Resource), data from GeneSetDB.
STITCH_MM_GUANINE-CID100000764	guanine(CID100000764) from STITCH (Search Tool for Interactions of Chemicals), data from GeneSetDB.
LIT_MM_HAUSER_BCR_B-CELL_UP	UP Rapid differential gene expression upon BCR activation (Table S1; Pubmed:19553523)
MIRNA_MM_BETEL_MMU-MIR-1965	BETEL_MMU-MIR-1965; Good mirSVR score Non-conserved; The microRNA.org resource: targets and expression.
SIDER_MM_SEDATION	Sedation from SIDER (SIDe Effect Resource), data from GeneSetDB.
LIT_MM_HOPE_8D_CULTURED-SHPROX1_DN	upregulated in 8-day cultured shProx1 cells--Microarray-based identification genes modulated by Prox1 knockdown (Table S4; Pubmed:20621054)
LIT_MM_HUNTER_AKR_DBA_BONE-MARROW_DIFF	Mouse AKR vs DBA bone marrow gene list (Table S6; Pubmed:19118016)
SIDER_MM_DISEASE_PROGRESSION	Disease progression from SIDER (SIDe Effect Resource), data from GeneSetDB.
MSIGDB_MM_SERVITJA_ISLET_HNF1A_TARGETS_UP	Genes up-regulated in pancreatic islets upon knockout of HNF1A [GeneID=6927].
LIT_MM_LAFFAIRE_TS1CJE_EUPLOID_CEREBELLUM_P10_DN	p10_DN_differentially expressed genes between Ts1Cje and euploid samples (Additional file 2; Pubmed:19331679)
GO_BP_MM_ANGIOGENESIS	GO:0001525 ; GO Term Name: angiogenesis ; GO domain: biological_process ; GO Evidence Code: IEA
STITCH_MM_U0126-CID003006531	U0126(CID003006531) from STITCH (Search Tool for Interactions of Chemicals), data from GeneSetDB.
LIT_MM_GLAUSER_GLUCOSE-CAMP_TARGET_PANCREATIC_METABOLIC_DN	down-Glucose and cAMP responsive targets were identified as described in material and methods.--pancreatic beta cells to metabolic stimulation (Table S1b; Pubmed:17587450)
MIRNA_MM_WANG_MMU-MIR-23A-3P	WANG_MMU-MIR-23A-3P; Prediction of both conserved and nonconserved microRNA targets in animals 2008.
TF_MM_FRIARD_PEA3	Target genes of transcription factor PEA3, predicted by CircuitsDB
SIDER_MM_WEAKNESS	Weakness from SIDER (SIDe Effect Resource), data from GeneSetDB.
LIT_MM_GALINDO_SWIM_HEART_DN	DN WTvsSwim,Gene expression alterations in mice after ISO-treatment or exercise via swimming (Table S1 ; Pubmed:20003209)
LIT_MM_SANDA_NOTCH1_T-ALL_POLYCLONAL-DPCELL_NORMAL_G2_UP	group2_Differentially expressed genes in a Notch1-induced mouse model of T-ALL (Table S2; Pubmed:20007543)
MSIGDB_MM_MARKEY_RB1_CHRONIC_LOF_UP	Genes up-regulated in MEF cells (embryonic fibroblasts) isolated from RB1 [GeneID=5925] knockout mice: chronic loss of function (LOF) of RB1.
MIRNA_MM_WANG_MMU-MIR-1186	WANG_MMU-MIR-1186; Prediction of both conserved and nonconserved microRNA targets in animals 2008.
LIT_MM_VOKES_SHH-RESPONSE_LIMB-GLI-TARGET_SMOM2-G_DIFF	SmoM2-G-Wt_Identification of a core set of Shh-responsive limb gli target genes (Dataset S2; Pubmed:18832070)
LIT_MM_LANGE_DPF3_VS_MUSCLE-TRANSCRIPTOME_DIFF	Given is a selection of 300 DPF3 ChIP-chip targets, which are characterized by gene ontology terms that have been shown to be overrepresented within the DPF3 target gene population compared to the analyzed muscle transcriptome. (Table S2; Pubmed:18765789)
LIT_MM_DEROO_TGF_D7E-MAMMARY-GLAND_DN	down-TGF?-responsive genes also present in the d7E mammary gland dataset. (Table S6; Pubmed:19484750)
LIT_MM_SALOMONIS_AES_AS_CEREBELLUM_CORTEX_UP	UP cerebellum_vs_cortex,Combined analysis of these datasets with the same AltAnalyze parameters showed a wide range in the number of predicted AEs(alternative exons),Resulting data for unique genes associated with AEs were compared for datasets indicative of AS(alternative splicing), Unique alternative exon profiles with ES cell differentiation (Dataset S1; Pubmed:20498046)
MIRNA_MM_WANG_MMU-MIR-30D-3P	WANG_MMU-MIR-30D-3P; Prediction of both conserved and nonconserved microRNA targets in animals 2008.
SIDER_MM_PNEUMONIA	Pneumonia from SIDER (SIDe Effect Resource), data from GeneSetDB.
MIRNA_MM_WANG_MMU-MIR-1931	WANG_MMU-MIR-1931; Prediction of both conserved and nonconserved microRNA targets in animals 2008.
LIT_MM_NASEEM_MRL-LAD-LIG_DIFF	MRL LAD lig vs norm (Table S4; Pubmed:17327495)
CTD_MM_ROSIGLITAZONE	rosiglitazone from CTD (Comparative Toxicogenomics Database), data from GeneSetDB.
MSIGDB_MM_AKT_UP.V1_UP	Genes up-regulated in mouse prostate by transgenic expression of human AKT1 gene [Gene ID=207] vs controls.
LIT_MM_VOKES_SHH-RESPONSE_LIMB-GLI-TARGET_SHHMUT-G_DIFF	ShhMut-G-Wt_Identification of a core set of Shh-responsive limb gli target genes (Dataset S2; Pubmed:18832070)
LIT_MM_LOPEZ_KK_UP	up-KK vs Control (Table S1; Pubmed:19749746)
LIT_MM_KROL_TARGETS-OF-MIR-182_183_93-CLUSTER-MIRNAS_PICTAR-TARGETSCAN-5.1-MICROCOSM_RETINA_DIFF	List of genes expressed in mouse retina and predicted to be targets of the miR-182/183/93 cluster miRNAs by each of the three algorithms: PicTar, Targetscan 5.1 and MicroCosm (Table S2; Pubmed:20478254)
MIRNA_MM_WANG_MMU-MIR-701-3P	WANG_MMU-MIR-701-3P; Prediction of both conserved and nonconserved microRNA targets in animals 2008.
LIT_MM_LEE_C7_GD-MODEL_DOPAMINERGIC-NEURON_ESC_DIFF	Cluser 7-Genes and clusters in K-means clustering analysis-- gene expressions of the guided differentiation (GD) model for dopaminergic (DA) neurons from mouse ESCs (Table SB; Pubmed:16627687)
MIRNA_MM_WANG_MMU-MIR-19A-3P	WANG_MMU-MIR-19A-3P; Prediction of both conserved and nonconserved microRNA targets in animals 2008.
LIT_MM_ZHU_SIMILAR-PATTERN_ANTI-IG_CD40L_CPG_IL-4_LPS_UP	up-Expression fold-changes and GO designations of features showing similar temporal patterns of expression changes in response to Anti-Ig, CD40L, CpG, IL-4 and LPS (Table S5; Pubmed:15585835)
LIT_MM_SHAROVA_CORRELATED-PC1-0.69PC2_STRAIN_DIFF	Genes whose expession significantly correlated with PC1+0.69脝C2 in Fig3 and represented mostly differences between strains (Table S2; Pubmed:17560561)
L2L_MM_IDX_TSA_UP_CLUSTER5	Up-regulated at 48-96 hours during differentiation of 3T3-L1 fibroblasts into adipocytes with IDX (insulin, dexamethasone and isobutylxanthine), vs. fibroblasts treated with IDX + TSA to prevent differentiation (cluster 5)
LIT_MM_YECHOOR_DIRECT_VS_INDIRECT-EFFECT_INSULIN_DIFF	Direct vs. indirect effect of insulin on gene regulation (Table S5; Pubmed:15546994)
LIT_MM_DERBINSKI_CD80HI-MTEC_VS_CD80LO-MTEC_DIFF	Complete listing of genes overexpressed in the CD80hi subset of mTECs compared with CD80lo mTECs. (Table S2; Pubmed:15983066)
LIT_MM_ESTLER_B16-CELL_RA-TREATMENT_UP	UP_List of genes whose expression is significantly regulated by RA treatment at one or more time point. (Additional file 1; Pubmed:18847503)
LIT_MM_ZHANG_LEISHMANIA-SPECIES_DN	DN List of genes up- or down-regulated by Leishmania species (Dataset S2; Pubmed:20361029)
GO_MF_MM_OXIDOREDUCTASE_ACTIVITY	GO:0016491 ; GO Term Name: oxidoreductase activity ; GO domain: molecular_function ; GO Evidence Code: IEA
L2L_MM_LAL_KO_3MO_UP	Up-regulated at 3 months of age in lungs from lysosomal acid lipase (LAL) knockout mice, which display pulmonary pathology, versus wild-type controls
LIT_MM_LINDSLEY_D6_NT-PLUS_VS_NT_UP	up-d6_NT+/d3_NT- (Table S1; Pubmed:18593559)
MSIGDB_MM_ZHENG_BOUND_BY_FOXP3	Genes whose promoters are bound by FOXP3 [GeneID=50943] based an a ChIP-chip analysis.
STITCH_MM_2-ARACHIDONOYLGLYCEROL-CID005282280	2-arachidonoylglycerol(CID005282280) from STITCH (Search Tool for Interactions of Chemicals), data from GeneSetDB.
LIT_MM_GIBBONS_393-LN-ONLY_SYNGENEIC-TUMOR_UP	1 - up 393 LN only,mRNA expression data for syngeneic tumors comparing 393P, 393LN and 344SQ (Table S2; Pubmed:19759262)
MSIGDB_MM_QI_HYPOXIA	Genes up-regulated by hypoxia in TRAMP-C cells (prostatic cancer).
LIT_MM_MOSCHELLA_PBMC_CTX_1-2D_DN	DN_List of the genes modulated 1-2 days after CTX in PBMC (Table S3; Pubmed:21444678)
CTD_MM_ANTHRA-1-9-CDPYRAZOL-6-2H-ONE	anthra(1,9-cd)pyrazol-6(2H)-one from CTD (Comparative Toxicogenomics Database), data from GeneSetDB.
CTD_MM_COBALTOUS_CHLORIDE	cobaltous chloride from CTD (Comparative Toxicogenomics Database), data from GeneSetDB.
LIT_MM_VAN-DER-PLUIJM_CHRONIC-GENOTOXIC-STRESS_96W_UP	up-Extensive overview of signficant expression changes in 96-week old wild-type mice compared to 8-week-old mice-chronic genotoxic stress (Table S4; Pubmed:17326724)
LIT_MM_GIRITHARAN_IVF-WM_VS_ICSI-KSOM_DN	down-IVF-WM vs ICSI-WM comparison (Table S1; Pubmed:20889529)
SIDER_MM_SEPSIS	Sepsis from SIDER (SIDe Effect Resource), data from GeneSetDB.
MIRNA_MM_WANG_MMU-MIR-669H-5P	WANG_MMU-MIR-669H-5P; Prediction of both conserved and nonconserved microRNA targets in animals 2008.
LIT_MM_PAIK_THYMOCYTE_FOXO-DELETE_UP	Upregulated in FoxO deleted thymocytes (Table S2; Pubmed:17254969)
MIRNA_MM_WANG_MMU-MIR-382-3P	WANG_MMU-MIR-382-3P; Prediction of both conserved and nonconserved microRNA targets in animals 2008.
STITCH_MM_SUPEROXIDE-CID000520535	superoxide(CID000520535) from STITCH (Search Tool for Interactions of Chemicals), data from GeneSetDB.
STITCH_MM_2-ARACHIDONOYLGLYCEROL-CID100001541	2-arachidonoylglycerol(CID100001541) from STITCH (Search Tool for Interactions of Chemicals), data from GeneSetDB.
LIT_MM_REYMANN_LUNG-ADENOCARCINOMAS_C-MYC-TRANSGENIC_TFS_UP	Analysis of promoters of 361 induced genes with respect to binding sites of TFs which were transcriptionally induced by c-Myc overexpression (Additional file 7; Pubmed:18498649)
SIDER_MM_PURPURA	Purpura from SIDER (SIDe Effect Resource), data from GeneSetDB.
SIDER_MM_EPISTAXIS	Epistaxis from SIDER (SIDe Effect Resource), data from GeneSetDB.
HPO_MM_ABNORMALITY_OF_CARBOXYLIC_ACID_METABOLISM	Abnormality of carboxylic acid metabolism from HPO (Human Phenotype Ontology), data from GeneSetDB.
MSIGDB_MM_BURTON_ADIPOGENESIS_5	Up-regulated at 48-96 h during differentiation of 3T3-L1 cells (fibroblast) into adipocytes.
REACTOME_MM_CBL_PATHWAY	Genes that interact with the gene CBL, which was extracted from FIsInGene_Pathway_041709 in the REACTOME.
MSIGDB_MM_ALTEMEIER_RESPONSE_TO_LPS_WITH_MECHANICAL_VENTILATION	Genes up-regulated in lung tissue upon LPS aspiration with mechanical ventilation (MV) compared to control (PBS aspiration without MV).
LIT_MM_HANADA_FIBULIN-4-PLUS-R_UP	up-Fibulin-4 +/R (Table S3; Pubmed:17293478)
LIT_MM_TACHDJIAN_DOXYCYCLINE-TREATED_R576IL13TG_Q576IL13TG_UP	UP Differential gene expression in doxycycline-treated B6.129Il4raR576/R576/IL-13tg (R576IL13tg) versus B6.Il4raR576/R576/IL-13tg (Q576IL13tg) mice (Table S5; Pubmed:19770271)
CTD_MM_DIMETHYLNITROSAMINE	Dimethylnitrosamine from CTD (Comparative Toxicogenomics Database), data from GeneSetDB.
LIT_MM_LISTON_B10_VS_NOD_UP	up--B10 v NOD(fold > 1) (Table S2; Pubmed:17239257)
LIT_MM_TVRDIK_R4-E10.5_HOXB1_EMBRYO_DN	Down-regulated genes in r4 of E10.5 Hoxb1-/- embryos (Table S4; Pubmed:16890163)
MIRNA_MM_WANG_MMU-MIR-3107-3P	WANG_MMU-MIR-3107-3P; Prediction of both conserved and nonconserved microRNA targets in animals 2008.
LIT_MM_LEE_CHIP-CHIP-RESULTS_GENE-BOUND-BY-HOXB4_DIFF	ChIP-chip results- ChIP-chip results using Tilescope software revealed that the promoter regions of 1910 genes were bound by HOXB4 (Table S2; Pubmed:20404135)
STITCH_MM_METHANOL-CID100000712	methanol(CID100000712) from STITCH (Search Tool for Interactions of Chemicals), data from GeneSetDB.
MIRNA_MM_BETEL_MMU-MIR-2140	BETEL_MMU-MIR-2140; Good mirSVR score Non-conserved; The microRNA.org resource: targets and expression.
SIDER_MM_SALIVATION	Salivation from SIDER (SIDe Effect Resource), data from GeneSetDB.
TFACTS_MM_EGR1	Target genes of transcription factor EGR1, predicted by TFactS, data from GeneSetDB.
STITCH_MM_HEME-CID100004973	heme(CID100004973) from STITCH (Search Tool for Interactions of Chemicals), data from GeneSetDB.
LIT_MM_WU_OSTEOSARCOMA_MYC-INACTIVATION_PR_DN	genes permanently repressed (PR) upon MYC inactivation. (Table S2; Pubmed:18535662)
LIT_MM_KIM_ALB-CRE_HIF1DPA-HIF2DPA_ALB-CRE_LIVER_UP	Top 200 gene upregulated in Alb-Cre; HIF1dPA / HIF2dPA livers relative to Alb-Cre control livers (Table S1; Pubmed:16977322)
LIT_MM_LI_CO2_NEONATAL_LUNG_UP	up-The altered genes in mice exposed to 8% CO2 were first analyzed based on the level of expression change (Table S1; Pubmed:16888043)
MIRNA_MM_BETEL_MMU-MIR-125B-3P	BETEL_MMU-MIR-125B-3P; Good mirSVR score Conserved; The microRNA.org resource: targets and expression.
MIRNA_MM_WANG_MMU-MIR-328-3P	WANG_MMU-MIR-328-3P; Prediction of both conserved and nonconserved microRNA targets in animals 2008.
MSIGDB_MM_DURAND_STROMA_MAX_DN	Down-regulated genes discriminating stromal cells that can support hematopoietic stem cells from those that cannot.
HPO_MM_ATROPHY_DEGENERATION_AFFECTING_THE_CENTRAL_NERVOUS_SYSTEM	Atrophy/Degeneration affecting the central nervous system from HPO (Human Phenotype Ontology), data from GeneSetDB.
STITCH_MM_SB203580-CID000176155	SB203580(CID000176155) from STITCH (Search Tool for Interactions of Chemicals), data from GeneSetDB.
LIT_MM_OCHSNER_BMEL-CELL_D1-AGGREGATE_BASAL_D5-AGGREGATE_BASAL_DCHIP_GA_DIFF	Group A_list of probe set with an F p-value less than 0.001. (Table S2; Pubmed:17641245)
CTD_MM_BENZENE	Benzene from CTD (Comparative Toxicogenomics Database), data from GeneSetDB.
STITCH_MM_PYROPHOSPHATE-CID000001023	pyrophosphate(CID000001023) from STITCH (Search Tool for Interactions of Chemicals), data from GeneSetDB.
LIT_MM_AIBA_ESCELL_PRIMITIVE-ENDODERM-LINEAGE_DIFF	A list of genes and their expression patterns for primitive endoderm lineage (Table S1; Pubmed:19112179)
STITCH_MM_PROSTAGLANDIN_E2-CID100000158	prostaglandin E2(CID100000158) from STITCH (Search Tool for Interactions of Chemicals), data from GeneSetDB.
LIT_MM_NISHIYAMA_TF-T_ES-CELL_UP	T Genes up-regulated or down-regulated >=2 fold in response to manipulation of transcription factors (Table S3; Pubmed:19796622)
MIRNA_MM_WANG_MMU-MIR-23B-3P	WANG_MMU-MIR-23B-3P; Prediction of both conserved and nonconserved microRNA targets in animals 2008.
MIRNA_MM_WANG_MMU-MIR-1936	WANG_MMU-MIR-1936; Prediction of both conserved and nonconserved microRNA targets in animals 2008.
MSIGDB_MM_WAKABAYASHI_ADIPOGENESIS_PPARG_RXRA_BOUND_36HR	Genes with promoters bound by both PPARG and RXRA [GeneID=5468, 6256] at 36 h time point of adipocyte differentiation of 3T3-L1 cells (preadipocyte).
MPO_MM_INCREASED_INFLAMMATORY_RESPONSE	increased inflammatory response from MPO (Mammalian Phenotype Ontology), data from GeneSetDB.
LIT_MM_MOULOS_MOIL_3H_DMSO_DN	DN Moil_3h/DMSO List of 925 differentially expressed genes in response to mastic oil. The list of 925 differentially expressed genes and their cluster memberships as derived after statistical and clustering analysis as described in Methods. Several annotation elements such as GenBank accession numbers and RefSeq IDs are included together with fold change ratios for each differentially expressed g…
MPO_MM_ABNORMAL_EMBRYOGENESIS_DEVELOPMENT	abnormal embryogenesis/ development from MPO (Mammalian Phenotype Ontology), data from GeneSetDB.
GENESIGDB_MM_BUONOMO_11_VIRAL_2	Mouse Viral_Buonomo11_116genes; 21205295-TableS2; data from GeneSigDB: http://compbio.dfci.harvard.edu/genesigdb/download/ALL_SIGSv4.gmt.
MIRNA_MM_WANG_MMU-MIR-669A-3-3P	WANG_MMU-MIR-669A-3-3P; Prediction of both conserved and nonconserved microRNA targets in animals 2008.
LIT_MM_CREYGHTON_H2AZ-ENRICHED_NEURAL-PRECURSOR_DIFF	H2AZ enriched genes in neural precursors (Table S10; Pubmed:18992931)
SIDER_MM_AGITATION	Agitation from SIDER (SIDe Effect Resource), data from GeneSetDB.
GO_CC_MM_APICAL_PLASMA_MEMBRANE	GO:0016324 ; GO Term Name: apical plasma membrane ; GO domain: cellular_component ; GO Evidence Code: IEA
STITCH_MM_N-ACETYLCYSTEINE-CID100000581	N-acetylcysteine(CID100000581) from STITCH (Search Tool for Interactions of Chemicals), data from GeneSetDB.
MSIGDB_MM_LIAN_LIPA_TARGETS_3M	Genes up-regulated at 3 months of age in lungs from LIPA [GeneID=3988] knockout mice, which display pulmonary pathology.
MICROCOSM_TARGETS_MM_HSA-MIR-454	hsa-miR-454 from MicroCosm Targets, data from GeneSetDB.
MPO_MM_ENLARGED_LYMPH_NODES	enlarged lymph nodes from MPO (Mammalian Phenotype Ontology), data from GeneSetDB.
LIT_MM_THOMAS_R6_2300Q_HDACI-4B-R6_2300Q_CEREBELLUM_DIFF	Potential candidate biomarkers for treatment effectiveness in the cerebellum. (Table S2; Pubmed:18829438)
STITCH_MM_ANG_II-CID000172197	Ang II(CID000172197) from STITCH (Search Tool for Interactions of Chemicals), data from GeneSetDB.
MIRNA_MM_BETEL_MMU-MIR-1937B	BETEL_MMU-MIR-1937B; Good mirSVR score Non-conserved; The microRNA.org resource: targets and expression.
LIT_MM_SCHEBESTA_PAX5_VS_PAX5_PRO-B-CELL_DIFF	cDNA microarray screen (Table S3; Pubmed:17658281)
LIT_MM_KULTIMA_VPA_P19-CELL-1_DIFF	Genes responding transcriptionally to VPA in P19 cells (Table S3; Pubmed:15345369)
STITCH_MM_P-38-CID000200878	p-38(CID000200878) from STITCH (Search Tool for Interactions of Chemicals), data from GeneSetDB.
SIDER_MM_LETHARGY	Lethargy from SIDER (SIDe Effect Resource), data from GeneSetDB.
LIT_MM_SHIN_MYD88TRIFLP02_VS_LP03_MYD88RIP2LP02_VS_LP03_MYD88TRIFISD_DOT_ICM-DEPEND_UP	UP_Genes that exhibit two-fold or greater Dot/Icm-dependent transcriptional changes in both Myd88?/?Trif?/? and Myd88?/?Rip2?/? macrophages and are shared by the ISD response in Myd88?/?Trif?/? macrophages. (Table S5; Pubmed:19043549)
LIT_MM_RONG_CONTROL-A-J_VS_CONTROL-B6_DN	down-The differentially expressed genes betwwen control A/J and control B6 mice (Table S1; Pubmed:22384161)
LIT_MM_CAI_SCSC-CLUSTER_HES_UP	(C) specifically upregulated in hES cells_SCSC clusters (Table S3; Pubmed:20300647)
GO_MF_MM_NUCLEIC_ACID_BINDING	GO:0003676 ; GO Term Name: nucleic acid binding ; GO domain: molecular_function ; GO Evidence Code: IEA
LIT_MM_COSTELLO_CD3_TCF_DP-THYMOCYTES_DIFF	Microarray analysis of basal and CD3-stimulated transcripts in DP thymocytes from wildtype and TCF mutant mice (Table S; Pubmed:20554967)
LIT_MM_MACKIEWICZ_C2_CEREBRAL-CORTEX_SLEEP_UP	up-sleep-c2-diffrentially expressed between sleep and wakefulness in the cerebral cortex - FDR <1%; linear trend analysis for temporal pattern in gene expression - FDR <5% (Table S1; Pubmed:17698924)
LIT_MM_THORREZ_TISSUE-SPECIFIC_HOUSEKEEPING_NOVARTIS_DN	280 genes are repressed in one of 28 tissues by analyzing the Novartis mouse Gene Atlas (Table S3; Pubmed:21088282)
MPO_MM_DECREASED_T_CELL_PROLIFERATION	decreased T cell proliferation from MPO (Mammalian Phenotype Ontology), data from GeneSetDB.
CTD_MM_4-OXORETINOIC_ACID	4-oxoretinoic acid from CTD (Comparative Toxicogenomics Database), data from GeneSetDB.
LIT_MM_LABBE_H2O2_EMBRYONIC-FIBROBLASTS_DN	DN Differential expression profile between untreated and H2O2-treated wild type mouse embryonic fibroblasts (Addi. file 1; Pubmed:20175907)
LIT_MM_THIERSCH_HYPOXIC_H2_DIFF	Differentially regulated genes by hypoxic preconditioning H2 (Table S2; Pubmed:18261226)
LIT_MM_FANG_LACRIMAL-GLAND_CORNEAL-TRAUMA-TWICE_DIFF	Complete list of known genes with the number of times gene expression was significantly altered over multiple time points: twice. (Table S1; Pubmed:15671270)
LIT_MM_SOMERVAILLE_HIGH_LOW-LSC_MLL-LEUKEMIA_MLL-AF10-LEUKEMIA_DN	Probe sets negatively correlated with LSC frequency in both data sets (Table S7; Pubmed:19200802)
HPO_MM_HYPERTONIA	Hypertonia from HPO (Human Phenotype Ontology), data from GeneSetDB.
LIT_MM_WANG_NIH3T3_PP242_RAPAMYCIN_UP	UP_Differential gene expression induced by PP242 in NIH3T3 cells (Table S1; Pubmed:21876130)
STITCH_MM_PYROPHOSPHATE-CID100001023	pyrophosphate(CID100001023) from STITCH (Search Tool for Interactions of Chemicals), data from GeneSetDB.
LIT_MM_RATTNER_BRIGHT-LIGHT_24H_LIGHT-DAMAGED_RPE-TRANSCRIPT_UP	UP_retinal pigment epithelium (RPE) transcripts that showed greater than 2-fold changes in abundance in light damaged versus control mice 24 hours after bright light exposure (Table S1; Pubmed:18815272)
MIRNA_MM_BETEL_MMU-MIR-30B_1	BETEL_MMU-MIR-30B_1; Good mirSVR score Non-conserved; The microRNA.org resource: targets and expression.
MSIGDB_MM_GRAESSMANN_RESPONSE_TO_MC_AND_DOXORUBICIN_DN	Genes down-regulated in ME-A cells (breast cancer, sensitive to apoptotic stimuli) exposed to doxorubicin [PubChem=31703] in the presence of medium concentrate (MC) from ME-C cells (breast cancer, resistant to apoptotic stimuli).
MIRNA_MM_WANG_MMU-MIR-3473C	WANG_MMU-MIR-3473C; Prediction of both conserved and nonconserved microRNA targets in animals 2008.
MSIGDB_MM_SANSOM_APC_TARGETS_DN	Top genes down-regulated at day 5 of Cre-Lox induced APC [GeneID=324] knockout in the intestine.
LIT_MM_PONTORIERO_AP-2ALPHA_LEN_DN	DN List of 415 putative target genes of AP-2? in the mouse lens (Table S1; Pubmed:18224708)
MIRNA_MM_WANG_MMU-MIR-411-5P	WANG_MMU-MIR-411-5P; Prediction of both conserved and nonconserved microRNA targets in animals 2008.
GO_CC_MM_INTRACELLULAR_MEMBRANE-BOUNDED_ORGANELLE	GO:0043231 ; GO Term Name: intracellular membrane-bounded organelle ; GO domain: cellular_component ; GO Evidence Code: IEA
TF_MM_FRIARD_ELF-1	Target genes of transcription factor ELF-1, predicted by CircuitsDB
LIT_MM_ROBERTS_MACROPHAGE_DMXAA_UP	UP_Genes up- or down-regulated greater than or equal to threefold after treatment of mouse macrophages with DMXAA (Table S1; Pubmed:17562815)
STITCH_MM_ATORVASTATIN-CID000060822	atorvastatin(CID000060822) from STITCH (Search Tool for Interactions of Chemicals), data from GeneSetDB.
LIT_MM_VALENTIN-VEGA_INTESTINE_3D_MDM2INT_UP	up-Gene expression in the intestine of 3-day old Mdm2int? mice (Table S2; Pubmed:18636077)
LIT_MM_MACLENNAN_LIVER_GYK-KO_DOL1_UP	Genes in the dol1 grey network module with Module Membership of 0.8 or higher. (Table S1B; Pubmed:19546021)
LIT_MM_LAFFAIRE_TS1CJE_EUPLOID_CEREBELLUM_P0_UP	p0_UP_differentially expressed genes between Ts1Cje and euploid samples (Additional file 2; Pubmed:19331679)
MIRNA_MM_BETEL_MMU-MIR-744	BETEL_MMU-MIR-744; Good mirSVR score Non-conserved; The microRNA.org resource: targets and expression.
LIT_MM_OUYANG_FOXO1-DE_CD4_VS_CD8_T-CELL_DIFF	Probesets for Genes Coregulated by Foxo1 in CD4+ and CD8+ T Cells (Table S3; Pubmed:19285438)
HPO_MM_INTELLECTUAL_DISABILITY	Intellectual disability from HPO (Human Phenotype Ontology), data from GeneSetDB.
LIT_MM_MOSCHELLA_BONE-MARROW_CTX_1-2D_DN	DN_List of the genes modulated 1-2 days after CTX in the bone marrow (Table S1; Pubmed:21444678)
MIRNA_MM_WANG_MMU-MIR-499-5P	WANG_MMU-MIR-499-5P; Prediction of both conserved and nonconserved microRNA targets in animals 2008.
CTD_MM_MUSTARD_GAS	Mustard Gas from CTD (Comparative Toxicogenomics Database), data from GeneSetDB.
LIT_MM_HIRATANI_K-MEANS-CLUSTERS-OF-REPLICATION-TIMING_CLUSTER-17_DIFF	cluster-17 Lists of RefSeq genes that reside within K means clusters of replication timing 1-20 as defined in Figures 6-7 and their mRNA expression data (Table S3; Pubmed:19952138)
SIDER_MM_ARRHYTHMIA	Arrhythmia from SIDER (SIDe Effect Resource), data from GeneSetDB.
LIT_MM_EFRONI_ESC_NPC_CHROMATIN-REMODEL-FACTOR_CHROMOSOME2_DIFF	Chromosome 2_The expression patterns for chromatin-remodeling factors (Table S4; Pubmed:18462694)
MIRNA_MM_WANG_MMU-MIR-505-3P	WANG_MMU-MIR-505-3P; Prediction of both conserved and nonconserved microRNA targets in animals 2008.
TFACTS_MM_ETS1	Target genes of transcription factor ETS1, predicted by TFactS, data from GeneSetDB.
MICROCOSM_TARGETS_MM_HSA-MIR-526B	hsa-miR-526b from MicroCosm Targets, data from GeneSetDB.
LIT_MM_GIANNAKIS_NORMAL-GASTRIC-HISTOLOGY_MGEP_UP	UP (A) normal gastric histology, mGEP genes differentially expressed after infection by strains obtained from hosts with normal gastric histology (A), ChAG (B), or adenocarcinoma (C),compared to uninfected cells (Table S3A; Pubmed:19723631)
LIT_MM_ZENG_MATERNAL-ZYGOTIC_PREIMPLANTATION_DIFF	Genes with Maternal-Zygotic expression profile (Table S2-B; Pubmed:15282163)
LIT_MM_ZHANG_IRE1ALPHA-NULL_LIVER_DN	64 genes whose expression was decreased in the knockout (KO) liver (Figure S1A; Pubmed:21407177)
LIT_MM_MARSON_PROBESET_FOXP3-DEPENDENT_STIMULATED-HYBRIDOMA-CELL_DIFF	Foxp3 dependent differentially expressed probesets in stimulated hybridoma cells (Table S7; Pubmed:17237765)
LIT_MM_MASCARENHAS_WA_UP	WA UP (Table S1; Pubmed:19794138)
LIT_MM_TERRADOS_AFTER-LONGTERM_DEPLETION-SP2-MEFS_DN	down-List of ?1.5 fold de-regulated genes after longterm depletion of Sp2 in MEFs (Table S6; Pubmed:22684502)
STITCH_MM_ISOPROTERENOL-CID000003779	isoproterenol(CID000003779) from STITCH (Search Tool for Interactions of Chemicals), data from GeneSetDB.
LIT_MM_MASSIP_ASCORBATE-TREATED-WRN-HELICASE-MUTANT_ASCORBATE-UNTREATED-WILD_LIVER_UP	UP List of genes altered in liver of ascorbate treated Wrn helicase mutant mice compared to untreated wild type animals (Table S2; Pubmed:19741171)
LIT_MM_DING_P5_DEL-NON-STARVED_DEL-STARVED_DN	DN Comparison 4. P5 Snord116del starved vs non-starved (2-AD, 6-CD, 10-ED, 12-FD) vs. (4-BD, 8-DD) (Table S2; Pubmed:20195375)
LIT_MM_KOULMANDA_NORMAL_DIABETIC_DIFF	Differentially expressed genes from normal vs. diabetic animals (Table S1; Pubmed:18852471)
KEGG_MM_HERPES_SIMPLEX_INFECTION	Herpes simplex infection http://www.genome.jp/kegg-bin/show_pathway?mmu05168
SIDER_MM_URINARY_TRACT_DISORDER	Urinary tract disorder from SIDER (SIDe Effect Resource), data from GeneSetDB.
MIRNA_MM_WANG_MMU-MIR-1B-5P	WANG_MMU-MIR-1B-5P; Prediction of both conserved and nonconserved microRNA targets in animals 2008.
LIT_MM_ROSSI_AGE_LT-HSC_DN	down-Age-regulated genes in LT-HSC (Table S4; Pubmed:15967997)
LIT_MM_FOYGEL_OCT4-MO-INJECTED_UNINJECTED_DN	Genes that have lower expression levels in Oct4-MO-injected compared to uninjected embryos (Table S4; Pubmed:19129941)
LIT_MM_HUSTER_ATP7B_LIVER_ALL_COPPER_WILSON-DISEASE_DN	down-All significantly changed genes sorted by decreasing magnitude of change (Table S4; Pubmed:17205981)
LIT_MM_HOLLOWAY_LIVER_HNF4ALPHA-KO_FEMALE-SPECIFIC_SEX-INDEPEND_DIFF	753 sex-independent liver genes that are up or down-regulated in HNF4?-deficient female but not male and are not sex-specific in the HNF4?-KO strain (groups 9A and 9B) (Table S6; Pubmed:18276827)
MIRNA_MM_WANG_MMU-MIR-211-3P	WANG_MMU-MIR-211-3P; Prediction of both conserved and nonconserved microRNA targets in animals 2008.
LIT_MM_COPPOLA_KIKO_SKELETAL-MUSCLE_DN	DN differentially expressed genes in the skeletal muscle of KIKO vs. WT mice at p<0.005 in two microarray platforms (Table S2; Pubmed:19376812)
EHMN_MM_LEUKOTRIENE_METABOLISM	Leukotriene_metabolism from EHMN (Edinburgh Human Metabolic Network), data from GeneSetDB.
MPO_MM_PARTIAL_PRENATAL_LETHALITY	partial prenatal lethality from MPO (Mammalian Phenotype Ontology), data from GeneSetDB.
MIRNA_MM_BETEL_MMU-MIR-669C	BETEL_MMU-MIR-669C; Good mirSVR score Non-conserved; The microRNA.org resource: targets and expression.
CTD_MM_SIMVASTATIN	Simvastatin from CTD (Comparative Toxicogenomics Database), data from GeneSetDB.
HPO_MM_PACE_OF_PROGRESSION	Pace of progression from HPO (Human Phenotype Ontology), data from GeneSetDB.
LIT_MM_BROWN_GRANULOCYTE-MACROPHAGE-DIFFERENTIATION_UP	up-Genes Associated with Granulocyte and Macrophage Differentiation (Table 1; Pubmed:16769770)
LIT_MM_KORALOV_MIR-142-3P_V-ABL_PRO-B-CELL_DICER-ABLATION_UP	Genes that Harbor 3? UTR Motifs Complementary to miR-142-3p, and Are Upregulated in v-Abl Transformed pro-B Cells upon Dicer Ablation (attached Excel file) (XLS 68 kb) (Table S3; Pubmed:18329371)
LIT_MM_KHO_PTCH_CMB_NORMAL_TPC1-49.10_TPC2-13.68_LUNG_DN	tPC1 49.10% tPC2 13.68% Mouse Lung DN 263 genes regulated in human classic medulloblastoma (cMB), and their respective mouse cerebellar and lung development signal, temporal PCs, and regulation in Ptch+/- Mouse MBs sorted in descending order by log fold of cMB/normal.Calls are mapped (A,M,P) to (0.00, 0.01, 1.00) (Table S3; Pubmed:15075291)
LIT_MM_GARINIS_DKO-CELL_IRRADIATED-UV_UP	up-List of significant expression profiles of DKO cells irradiated with 0.6J/m2 of UV (gray color) as compared to non-irradiated DKO cells (Table 5; Pubmed:19363488)
LIT_MM_ROSEN_PFOA_PPARA-NULL_DIFF	PFOA-regulated genes in wild-type and PPARa-null mice (File S2; Pubmed:18281256)
LIT_MM_VENEZIA_FETAL-LIVER_UP	Up in Fetal Liver (Table S44; Pubmed:15459755)
LIT_MM_MATSUMOTO_HOXB4_HSC-UNRELATED_UP	Adult HSC-related genes up-regulated by HOXB4 (Table S3 ; Pubmed:19287487)
LIT_MM_DIETERICH_HIGH-VANCOMYCIN_SALINE_8D_UP	UP_Most Enriched GO Term Categories among the 1537 Probes Whose Intensity Changed by at least Twofold after Administration of High-Dose Vancomycin compared with Saline, Independently of the Delivery Route (Evaluation Performed on Day 8) (Table S2; Pubmed:18930951)
LIT_MM_MERCER_OLIGODENDROCYTE-PROGENITOR_DN	down-Expression of mRNAs according to microarray analysis at different stages of oligodendrocyte and neuronal differentiation--oligodendrocyte progenitors, OLP (Table S1; Pubmed:20137068)
LIT_MM_GAGLIO_GLUCOSE-GLUTAMINE_48H_72H_T_N_DIFF	expression levels for genes encoding proteins involved in glycolysis, TCA cycle and glutamine metabolism,at 48 and 72 h for NIH3T3 and NIH3T3 K-Ras mouse grown in 25mM glucose +4mM glutamine (Dataset; Pubmed:21847114)
LIT_MM_DANG-DO_PERK_VS_PERK_LIVER-WITHOUT-TBUHQ_UP	List of genes whose mRNA abundance increased in the absence of PERK in livers perfused without tBuHQ (Table S3A; Pubmed:19509078)
LIT_MM_TATARAKIS_18.5D_TAF10-LOX_VS_LOX-ALFPCRE_EMBRYOS_UP	Genes Upregulated in the livers of 18.5 days TAF10 lox/lox-AlfpCre postcoitus embryos (Table S2; Pubmed:18722179)
SIDER_MM_MUSCULOSKELETAL_DISORDER	Musculoskeletal disorder from SIDER (SIDe Effect Resource), data from GeneSetDB.
LIT_MM_GILICZE_MUCOSAL-MAST-CELL_20D_VS_4D_UP	upregulated >2.0-fold genes at p<0.05 (with Benjamini-Hochberg false discovery rate multiple testing correction) significance level during mucosal mast cell differentiation (day20/day4 data). (Table S2; Pubmed:17292962)
SIDER_MM_HYPERGLYCAEMIA	Hyperglycaemia from SIDER (SIDe Effect Resource), data from GeneSetDB.
LIT_MM_POTIREDDY_MMRNA_MII-OOCYTE_3FOLD_UP	Functional categorization of the MmRNAs enhanced in the translatome of MII oocytes--cut off 3 fold. (Table S2; Pubmed:16860309)
MIRNA_MM_WANG_MMU-MIR-1949	WANG_MMU-MIR-1949; Prediction of both conserved and nonconserved microRNA targets in animals 2008.
LIT_MM_ARENA_MLP-29-CELL_KRAS-KI_DN	DN_the KRAS-KI signature in MLP-29 cells (Table S1; Pubmed:17875685)
MICROCOSM_TARGETS_MM_HSA-MIR-335	hsa-miR-335 from MicroCosm Targets, data from GeneSetDB.
MIRNA_MM_WANG_MMU-MIR-367-3P	WANG_MMU-MIR-367-3P; Prediction of both conserved and nonconserved microRNA targets in animals 2008.
LIT_MM_SI_KIDNEY_DOXORUBICIN_BALB_C_M_F_DN	DN_List of differentially expressed transcripts in kidneys of doxorubicin treated Balb/c male and female mice (Table S2; Pubmed:19277126)
LIT_MM_SIEVERTZON_NS_VS_PROLIFERATION-SAMPLE_DIFF	Differentially expressed genes in the NS vs. Proliferation samples only (Table S2; Pubmed:16124881)
LIT_MM_LACAZE_CASP4_IFN_VS_RISCFREE_IFN_RNAI_UP	UP Casp4_IFN+ vs. Riscfree_IFN+,RNAi gene expression clusters (Addi. file 8; Pubmed:19664281)
MIRNA_MM_BETEL_MMU-MIR-1951	BETEL_MMU-MIR-1951; Good mirSVR score Non-conserved; The microRNA.org resource: targets and expression.
MIRNA_MM_WANG_MMU-MIR-466I-5P	WANG_MMU-MIR-466I-5P; Prediction of both conserved and nonconserved microRNA targets in animals 2008.
LIT_MM_HUANG_UBE2M_CTR_UP	Differential expression in any comparison; Ube2m versus Ctr (Table S5; Pubmed:19250909)
MIRNA_MM_WANG_MMU-MIR-191-3P	WANG_MMU-MIR-191-3P; Prediction of both conserved and nonconserved microRNA targets in animals 2008.
MIRNA_MM_WANG_MMU-MIR-539-3P	WANG_MMU-MIR-539-3P; Prediction of both conserved and nonconserved microRNA targets in animals 2008.
MICROCOSM_TARGETS_MM_HSA-MIR-367	hsa-miR-367 from MicroCosm Targets, data from GeneSetDB.
MPO_MM_ABNORMAL_B_CELL_PHYSIOLOGY	abnormal B cell physiology from MPO (Mammalian Phenotype Ontology), data from GeneSetDB.
CTD_MM_ETHANOL	Ethanol from CTD (Comparative Toxicogenomics Database), data from GeneSetDB.
STITCH_MM_BERBERINE-CID000002353	berberine(CID000002353) from STITCH (Search Tool for Interactions of Chemicals), data from GeneSetDB.
MIRNA_MM_WANG_MMU-MIR-361-3P	WANG_MMU-MIR-361-3P; Prediction of both conserved and nonconserved microRNA targets in animals 2008.
CTD_MM_CURCUMIN	Curcumin from CTD (Comparative Toxicogenomics Database), data from GeneSetDB.
MIRNA_MM_WANG_MMU-MIR-466E-5P	WANG_MMU-MIR-466E-5P; Prediction of both conserved and nonconserved microRNA targets in animals 2008.
LIT_MM_INFANTE_DKO_36H_DN	DKO 36h down (Table S1; Pubmed:19066456)
MIRNA_MM_BETEL_MMU-MIR-1956	BETEL_MMU-MIR-1956; Good mirSVR score Non-conserved; The microRNA.org resource: targets and expression.
STITCH_MM_L-ARGININE-CID100000232	L-arginine(CID100000232) from STITCH (Search Tool for Interactions of Chemicals), data from GeneSetDB.
LIT_MM_HOFFMANN_PRE-BI_VS_LARGE-PRE-BII-CELL_DIFF	Genes with at least fivefold change in expression between Pre-BI and Large Pre-BII cells (TableS1A; Pubmed:11779835)
STITCH_MM_HEME-CID000004973	heme(CID000004973) from STITCH (Search Tool for Interactions of Chemicals), data from GeneSetDB.
MPO_MM_ABNORMAL_BLOOD_VESSEL_MORPHOLOGY	abnormal blood vessel morphology from MPO (Mammalian Phenotype Ontology), data from GeneSetDB.
SIDER_MM_DERMATITIS	Dermatitis from SIDER (SIDe Effect Resource), data from GeneSetDB.
MIRNA_MM_WANG_MMU-MIR-140-3P	WANG_MMU-MIR-140-3P; Prediction of both conserved and nonconserved microRNA targets in animals 2008.
LIT_MM_HOELZINGER_TREG_TEFF_DIFF	Selection algorithm to derive genes that are differentially regulated in Tregs and sensitive tolL6 (Table S1; Pubmed:20483762)
MIRNA_MM_BETEL_MMU-MIR-466F-5P	BETEL_MMU-MIR-466F-5P; Good mirSVR score Non-conserved; The microRNA.org resource: targets and expression.
LIT_MM_RADONJIC_HIGH-FAT_HFBT_HFP_VS_CHOW_16TIME-POINT_DIFF	list of 1663 genes differentially expressed under the high-fat conditions (false discovery rate q-value<0.1 in either of HFBT versus chow and HFP versus chow comparisons per time-point), including detailed annotation of these genes, expression ratios and the statistics (as determined by limma package) in each of the experimental conditions. (Table S2; Pubmed:19680557)
LIT_MM_ARENA_MLP-29-CELL_KRAS-KI_UP	UP_the KRAS-KI signature in MLP-29 cells (Table S1; Pubmed:17875685)
LIT_MM_KAHLEM_DOSAGE-EFFECT_MULTIPLE-TISSUE_DOWN-SYNDROME_DIFF	Transcript Level Alterations Reflect Gene Dosage Effects Across Multiple Tissues in a Mouse Model of Down Syndrome (Table S2; Pubmed:15231742)
LIT_MM_GOFFARD_THYROID-TRANSGENIC_ADENOSINE-RECEPTOR_DN	down-Regulated and Proposed Gene Ontology Function at Different Level of Biological Process--Gene expression profile in thyroid of transgenic mice overexpressing the adenosine receptor 2a (Table 2; Pubmed:14563936)
LIT_MM_DEEB_INTRINSIC_SV40_T_T-ANTIGEN-SIGNATURE_DIFF	Intrinsic SV40-T/t-antigen Signature Genes (Table S3(Sl Info Table 1); Pubmed:17804718)
MIRNA_MM_WANG_MMU-MIR-223-5P	WANG_MMU-MIR-223-5P; Prediction of both conserved and nonconserved microRNA targets in animals 2008.
LIT_MM_LEE_C5_GD-MODEL_DOPAMINERGIC-NEURON_ESC_DIFF	Cluser 5-Genes and clusters in K-means clustering analysis-- gene expressions of the guided differentiation (GD) model for dopaminergic (DA) neurons from mouse ESCs (Table SB; Pubmed:16627687)
MIRNA_MM_WANG_MMU-MIR-669L-3P	WANG_MMU-MIR-669L-3P; Prediction of both conserved and nonconserved microRNA targets in animals 2008.
MSIGDB_MM_AKT_UP_MTOR_DN.V1_UP	Genes up-regulated by everolimus [PubChem = 6442177] in mouse prostate tissue transgenically expressing human AKT1 gene [Gene ID=207] vs untreated controls.
MIRNA_MM_BETEL_MMU-MIR-2132	BETEL_MMU-MIR-2132; Good mirSVR score Non-conserved; The microRNA.org resource: targets and expression.
LIT_MM_AMENGUAL_BC-DIET_INGUINAL-WHITE-ADIPOSE_DN	DN_Main pathways affected by dietary ?-carotene supplementation in inguinal white adipose tissue of wild-type mice as indicated by Metacore analysis (Table S2; Pubmed:21673813)
LIT_MM_MERCER_MYELINATING-OLIGODENDROCYTE_UP	up-Expression of mRNAs according to microarray analysis at different stages of oligodendrocyte and neuronal differentiation-- myelinating oligodendrocytes: MYO (Table S1; Pubmed:20137068)
MICROCOSM_TARGETS_MM_MMU-MIR-694	mmu-miR-694 from MicroCosm Targets, data from GeneSetDB.
LIT_MM_MACLENNAN_LIVER_GYK-KO_DOL3_UP	Genes in the dol3 grey network module with Module Membership of 0.8 or higher. (Table S1D; Pubmed:19546021)
MIRNA_MM_WANG_MMU-MIR-1935	WANG_MMU-MIR-1935; Prediction of both conserved and nonconserved microRNA targets in animals 2008.
LIT_MM_SCHULZ_UPDP-CHRS7-11-PROXIMAL_T65H-BREAKPOINT_DIFF	Differentially Expressed Transcripts within the UpDp of Chrs 7 & 11 Proximal to the T65H Breakpoint (file012; Pubmed:16855283)
MIRNA_MM_WANG_MMU-MIR-410-3P	WANG_MMU-MIR-410-3P; Prediction of both conserved and nonconserved microRNA targets in animals 2008.
LIT_MM_FEUERER_FAT-TREG_FAT-TCONV_DN	DN_Fat Treg specific genes (Table SI; Pubmed:19633656)
MIRNA_MM_WANG_MMU-MIR-669A-3P	WANG_MMU-MIR-669A-3P; Prediction of both conserved and nonconserved microRNA targets in animals 2008.
MIRNA_MM_WANG_MMU-MIR-302D-3P	WANG_MMU-MIR-302D-3P; Prediction of both conserved and nonconserved microRNA targets in animals 2008.
LIT_MM_COX_PLACENTA_TROPHOBLAST-PHENOTYPIC_1-TO-1-ORTHOLOG_DIFF	Placenta and trophoblast phenotypic one to one orthologous genes (Table SVII; Pubmed:19536202)
MIRNA_MM_BETEL_MMU-LET-7D_1	BETEL_MMU-LET-7D_1; Good mirSVR score Conserved; The microRNA.org resource: targets and expression.
MIRNA_MM_WANG_MMU-MIR-669D-5P	WANG_MMU-MIR-669D-5P; Prediction of both conserved and nonconserved microRNA targets in animals 2008.
STITCH_MM_ARA-CTP-CID100000593	ara-CTP(CID100000593) from STITCH (Search Tool for Interactions of Chemicals), data from GeneSetDB.
LIT_MM_XU-CNS_AAGS_DIFF	Gene lists of mouse CNS AAGs (Table S2b; Pubmed:17988385)
LIT_MM_INFANTE_E2F1_KO_36H_DN	E2F1 KO 36h down (Table S1; Pubmed:19066456)
MIRNA_MM_WANG_MMU-MIR-3092-5P	WANG_MMU-MIR-3092-5P; Prediction of both conserved and nonconserved microRNA targets in animals 2008.
MPO_MM_ABNORMAL_LUNG_MORPHOLOGY	abnormal lung morphology from MPO (Mammalian Phenotype Ontology), data from GeneSetDB.
LIT_MM_TEMPLETON_C57BL_6J-ASTROCYTE_VS_DBA_2J-ASTROCYTE_RETINA_UP	UP C57BL/6J Astrocyte vs DBA/2J Astrocyte Fold Change (Table S3; Pubmed:19643015)
LIT_MM_LOVAS_LTBETAR_10H_UP	Cat-I-1_LT?R-responsive genes in wt cells (Additional file 2; Pubmed:19087315)
SIDER_MM_HYPOPHOSPHATAEMIA	Hypophosphataemia from SIDER (SIDe Effect Resource), data from GeneSetDB.
GO_CC_MM_GOLGI_MEMBRANE	GO:0000139 ; GO Term Name: Golgi membrane ; GO domain: cellular_component ; GO Evidence Code: IEA
MIRNA_MM_WANG_MMU-MIR-471-3P	WANG_MMU-MIR-471-3P; Prediction of both conserved and nonconserved microRNA targets in animals 2008.
MIRNA_MM_WANG_MMU-MIR-466D-5P	WANG_MMU-MIR-466D-5P; Prediction of both conserved and nonconserved microRNA targets in animals 2008.
LIT_MM_SCHRIMPE_HNEA_6H_DN	6h DN Select Gene Expression Changes Mediated by HNEa (Table 3; Pubmed:19191707)
STITCH_MM_CYTIDINE_TRIPHOSPHATE-CID000006176	cytidine triphosphate(CID000006176) from STITCH (Search Tool for Interactions of Chemicals), data from GeneSetDB.
LIT_MM_SI_KIDNEY_HEALTHY_BALB_C_M_F_DN	DN_List of differentially expressed transcripts in kidneys of healthy Balb/c male (M) and female (F) mice (Table S1; Pubmed:19277126)
MICROCOSM_TARGETS_MM_HSA-MIR-545	hsa-miR-545 from MicroCosm Targets, data from GeneSetDB.
GO_MF_MM_LIPID_BINDING	GO:0008289 ; GO Term Name: lipid binding ; GO domain: molecular_function ; GO Evidence Code: IEA
MIRNA_MM_WANG_MMU-MIR-743A-3P	WANG_MMU-MIR-743A-3P; Prediction of both conserved and nonconserved microRNA targets in animals 2008.
LIT_MM_LEE_MRNA-TARGETS-SHARED-BY-CUGBP1-PUM1_DIFF	CUGBP1+Pum1 Lists of mRNA targets shared by CUGBP1, HuR and/or Pum1 (Table S3; Pubmed:20574513)
MIRNA_MM_WANG_MMU-MIR-574-5P	WANG_MMU-MIR-574-5P; Prediction of both conserved and nonconserved microRNA targets in animals 2008.
MIRNA_MM_WANG_MMU-MIR-370-3P	WANG_MMU-MIR-370-3P; Prediction of both conserved and nonconserved microRNA targets in animals 2008.
HPO_MM_NAUSEA_AND_VOMITING	Nausea and vomiting from HPO (Human Phenotype Ontology), data from GeneSetDB.
LIT_MM_GIRITHARAN_IN-VIVO_VS_ICSI-WM_DN	down-In vivo vs ICSI-WM comparison (Table S1; Pubmed:20889529)
HPO_MM_ABNORMALITY_OF_THE_HAIR	Abnormality of the hair from HPO (Human Phenotype Ontology), data from GeneSetDB.
MSIGDB_MM_GOLDRATH_HOMEOSTATIC_PROLIFERATION	Up-regulated in CD8+ [GeneID=925] T lymphocytes undergoing homeostatic proliferation (HP) versus the naive cells; these genes are not up-regulated versus effector or memory cell population.
LIT_MM_COX_PLACENTA_1-TO-1-ORTHOLOG_DIFF	one to one orthologs with species specific expression (Table SVI; Pubmed:19536202)
LIT_MM_POWELL_BETACSER585GLY-BETAC_CTL-EN-CELL_GM-CSF_UP	UP Ser585 differentially regulated genes,138 genes identified as being differentially expressed between the wildtype ?c and ?cSer585Gly mutant CTL-EN cells in response to GM-CSF was generated with the use of a Euclidean matrix (Table S3; Pubmed:19805619)
LIT_MM_FLYGARE_BFU-E_DEX_50P_DN	Dex_Overlap of genes downregulated >50% by Dex, DMOG and both Dex and DMOG in BFU-E cells (Table S6; Pubmed:21177435)
LIT_MM_MILENKOVIC_HESPERIDINE_UP	up-Hesperidine --- List of differentially expressed mRNAs (Table S5; Pubmed:22253797)
LIT_MM_KENT_E14.5-FL-HSC_ADULT-BM-HSC_UP	To search for new candidate regulators of HSC self-renewal durability, we first compared the tag counts of LongSAGE libraries generated from highly purified HSC populations isolated from E14.5 FL and adult BM (Table S1; Pubmed:19377048)
LIT_MM_AGARWAL_IL-12-AG-B7_AG-B7-ONLY_NAIVE-CD8-T-CELL_DIFF	IL-12 - dependent gene expression changes (IL-12 + Ag-B7 versus Ag-B7 only) (Table S II; Pubmed:19592655)
SIDER_MM_MUCOUS_MEMBRANE_DISORDER	Mucous membrane disorder from SIDER (SIDe Effect Resource), data from GeneSetDB.
LIT_MM_BLOMBERG_ANTI-CD3-C_ANTI-CD3_CD28-C_CD3-T-CELL_UP	UP_3713 probe-set overlapping upon anti-CD3- and anti-CD3/CD28-stimulations in Wt CD3? T-cells (Additional file 5; Pubmed:19450280)
LIT_MM_OUYANG_FOXO1-DE_CD8_T-CELL_DIFF	Probesets for Differentially Expressed Genes in Foxo1-Deficient and Wild-Type CD8+ T Cells (Table S2; Pubmed:19285438)
LIT_MM_MAIN_1.5X-HYPOXIA_DIFF	A compilation of all genes summarized in Fig. 2B (Figure S4A; Pubmed:20034489)
MIRNA_MM_BETEL_MMU-MIR-696	BETEL_MMU-MIR-696; Good mirSVR score Non-conserved; The microRNA.org resource: targets and expression.
LIT_MM_ROBSON_CELL-DEATH-APOPTOSIS_8H_MYC-ERTAM_DIFF	Cell death and apoptosis genes showing significant change in expression within 8 hours of MYC-ERTAM activation (Table S4; Pubmed:21961992)
LIT_MM_WHITE_NEUROG3-EGFP-PROGENITOR_VS_DESCENDENT_DN	down-Differential expression of Neurog3-EGFP progenitors vs. descendents, determined to be statistically significant using EDGE (P <= 0.05) (Table S2; Pubmed:18071024)
LIT_MM_ELMEN_LNA-ANTIMIR1_LIVER_24H_UP	UP Differentially expressed genes in LNA-antimiR treated mice livers 24 hours after last dose (Table S1; Pubmed:18158304)
MIRNA_MM_WANG_MMU-MIR-582-5P	WANG_MMU-MIR-582-5P; Prediction of both conserved and nonconserved microRNA targets in animals 2008.
STITCH_MM_S-ADENOSYL-L-METHIONINE-CID100001079	S-adenosyl-L-methionine(CID100001079) from STITCH (Search Tool for Interactions of Chemicals), data from GeneSetDB.
MIRNA_MM_BETEL_MMU-MIR-471	BETEL_MMU-MIR-471; Good mirSVR score Non-conserved; The microRNA.org resource: targets and expression.
STITCH_MM_NADP-H-CID000005884	NADP(H)(CID000005884) from STITCH (Search Tool for Interactions of Chemicals), data from GeneSetDB.
MIRNA_MM_BETEL_MMU-MIR-2135	BETEL_MMU-MIR-2135; Good mirSVR score Non-conserved; The microRNA.org resource: targets and expression.
MIRNA_MM_WANG_MMU-MIR-7A-2-3P	WANG_MMU-MIR-7A-2-3P; Prediction of both conserved and nonconserved microRNA targets in animals 2008.
STITCH_MM_GLUTAMATE-CID000033032	glutamate(CID000033032) from STITCH (Search Tool for Interactions of Chemicals), data from GeneSetDB.
STITCH_MM_RAPAMYCIN-CID100005040	rapamycin(CID100005040) from STITCH (Search Tool for Interactions of Chemicals), data from GeneSetDB.
LIT_MM_MITIKU_GASTRULATION_PERI-ORGANOGENEIS_CI_DIFF	Cluster I_Seven dominant clusters identified in gastrulation and peri-organogenesis timecourse (Table S4; Pubmed:18061570)
MIRNA_MM_WANG_MMU-MIR-302B-3P	WANG_MMU-MIR-302B-3P; Prediction of both conserved and nonconserved microRNA targets in animals 2008.
MIRNA_MM_WANG_MMU-MIR-203-3P	WANG_MMU-MIR-203-3P; Prediction of both conserved and nonconserved microRNA targets in animals 2008.
GO_BP_MM_SMALL_GTPASE_MEDIATED_SIGNAL_TRANSDUCTION	GO:0007264 ; GO Term Name: small GTPase mediated signal transduction ; GO domain: biological_process ; GO Evidence Code: IEA
MIRNA_MM_WANG_MMU-MIR-669D-2-3P	WANG_MMU-MIR-669D-2-3P; Prediction of both conserved and nonconserved microRNA targets in animals 2008.
MIRNA_MM_WANG_MMU-MIR-669O-3P	WANG_MMU-MIR-669O-3P; Prediction of both conserved and nonconserved microRNA targets in animals 2008.
SIDER_MM_SYNCOPE	Syncope from SIDER (SIDe Effect Resource), data from GeneSetDB.
STITCH_MM_DOXORUBICIN-CID100001690	doxorubicin(CID100001690) from STITCH (Search Tool for Interactions of Chemicals), data from GeneSetDB.
MIRNA_MM_GRIMSON_MIR-140_140-5P_876-3P_1244	GRIMSON_MIR-140_140-5P_876-3P_1244; Predicted_Targets_Info; MicroRNA Targeting Specificity in Mammals: Determinants beyond Seed Pairing.
CTD_MM_ARSENITE	arsenite from CTD (Comparative Toxicogenomics Database), data from GeneSetDB.
SIDER_MM_RESPIRATORY_DISORDER	Respiratory disorder from SIDER (SIDe Effect Resource), data from GeneSetDB.
LIT_MM_MILENKOVIC_CAFEIC-ACID_UP	up-Cafeic acid --- List of differentially expressed mRNAs (Table S5; Pubmed:22253797)
MIRNA_MM_WANG_MMU-MIR-382-5P	WANG_MMU-MIR-382-5P; Prediction of both conserved and nonconserved microRNA targets in animals 2008.
LIT_MM_CHAMBERS_AGE_DN	Down-With-Age gene list (Table S2; Pubmed:17676974)
MIRNA_MM_BETEL_MMU-MIR-654-5P	BETEL_MMU-MIR-654-5P; Good mirSVR score Non-conserved; The microRNA.org resource: targets and expression.
LIT_MM_RAJASHEKHAR_CONTINUOUS_VS_ACUTE-ACTIVATION_DIFF	Analysis of significant hits indicated divergence between continuous and acute activation as shown in Table 1 and Supplemental Table S2 (Table S2; Pubmed:17566077)
LIT_MM_XU-CNS_6-16M_16-24M_P2_DIFF	Gene lists of mouse CNS age-related gene expression pattern 2 (Table S2aP2; Pubmed:17988385)
LIT_MM_KIDDER_GATA3-BOUND-REGIONS_TS-CELL_DIFF	GATA3 bound regions in murine TS cells (Table S5; Pubmed:20176728)
MICROCOSM_TARGETS_MM_HSA-MIR-377	hsa-miR-377 from MicroCosm Targets, data from GeneSetDB.
MIRNA_MM_WANG_MMU-MIR-763	WANG_MMU-MIR-763; Prediction of both conserved and nonconserved microRNA targets in animals 2008.
MIRNA_MM_WANG_MMU-MIR-376C-3P	WANG_MMU-MIR-376C-3P; Prediction of both conserved and nonconserved microRNA targets in animals 2008.
LIT_MM_LABBE_WS_H2O2-WS_EMBRYONIC-FIBROBLASTS_DN	DN Differential expression profile between untreated and H2O2-treated Wrn helicase mutant mouse embryonic fibroblasts (Addi. file 2; Pubmed:20175907)
MIRNA_MM_WANG_MMU-MIR-291A-3P	WANG_MMU-MIR-291A-3P; Prediction of both conserved and nonconserved microRNA targets in animals 2008.
MIRNA_MM_BETEL_MMU-MIR-688	BETEL_MMU-MIR-688; Good mirSVR score Non-conserved; The microRNA.org resource: targets and expression.
LIT_MM_TEMPLETON_PC2_RETINA_DIFF	Genes of Principal Component 2 (PC2) (Table S6; Pubmed:19643015)
STITCH_MM_DOXORUBICIN-CID000031703	doxorubicin(CID000031703) from STITCH (Search Tool for Interactions of Chemicals), data from GeneSetDB.
MIRNA_MM_BETEL_MMU-MIR-1193	BETEL_MMU-MIR-1193; Good mirSVR score Conserved; The microRNA.org resource: targets and expression.
MIRNA_MM_WANG_MMU-MIR-1934-5P	WANG_MMU-MIR-1934-5P; Prediction of both conserved and nonconserved microRNA targets in animals 2008.
MIRNA_MM_WANG_MMU-MIR-206-3P	WANG_MMU-MIR-206-3P; Prediction of both conserved and nonconserved microRNA targets in animals 2008.
MSIGDB_MM_BRUINS_UVC_RESPONSE_VIA_TP53_GROUP_D	Category D genes: p53-independent genes whose expression in the absence of S389 phosphorylation is similar to loss of TP53 [GeneID=7157] in MEF (embryonic fibroblast) cells in response to UV-C irradiation.
STITCH_MM_EGCG-CID000065064	EGCG(CID000065064) from STITCH (Search Tool for Interactions of Chemicals), data from GeneSetDB.
SIDER_MM_THIRST	Thirst from SIDER (SIDe Effect Resource), data from GeneSetDB.
MIRNA_MM_BETEL_MMU-MIR-337-3P	BETEL_MMU-MIR-337-3P; Good mirSVR score Non-conserved; The microRNA.org resource: targets and expression.
STITCH_MM_GLUTAMATE-CID100000611	glutamate(CID100000611) from STITCH (Search Tool for Interactions of Chemicals), data from GeneSetDB.
MIRNA_MM_BETEL_MMU-MIR-1941-5P	BETEL_MMU-MIR-1941-5P; Good mirSVR score Non-conserved; The microRNA.org resource: targets and expression.
LIT_MM_GOVONI_6H_24H-GH-TREATMENT_UP	up-6h_24h--Genes that are significantly different from the controls at 6 or 24 hours after GH treatment (Table S; Pubmed:16464905)
MIRNA_MM_BETEL_MMU-MIR-340-3P	BETEL_MMU-MIR-340-3P; Good mirSVR score Non-conserved; The microRNA.org resource: targets and expression.
MIRNA_MM_WANG_MMU-MIR-466P-5P	WANG_MMU-MIR-466P-5P; Prediction of both conserved and nonconserved microRNA targets in animals 2008.
MIRNA_MM_WANG_MMU-MIR-3093-3P	WANG_MMU-MIR-3093-3P; Prediction of both conserved and nonconserved microRNA targets in animals 2008.
MIRNA_MM_WANG_MMU-MIR-188-3P	WANG_MMU-MIR-188-3P; Prediction of both conserved and nonconserved microRNA targets in animals 2008.
CTD_MM_BETA-NAPHTHOFLAVONE	beta-Naphthoflavone from CTD (Comparative Toxicogenomics Database), data from GeneSetDB.
MIRNA_MM_WANG_MMU-MIR-130B-5P	WANG_MMU-MIR-130B-5P; Prediction of both conserved and nonconserved microRNA targets in animals 2008.
MSIGDB_MM_ESC_V6.5_UP_LATE.V1_DN	Genes down-regulated during late stages of differentiation of embryoid bodies from V6.5 embryonic stem cells.
STITCH_MM_L-ARGININE-CID000006322	L-arginine(CID000006322) from STITCH (Search Tool for Interactions of Chemicals), data from GeneSetDB.
LIT_MM_RUTSCH_IL-6_IMYC_VS_IL-6-ONLY_TUMOR_UP	UP List of differentially expressed genes in IL-6/iMyc versus IL-6 only tumors (Table S2; Pubmed:20018915)
MIRNA_MM_WANG_MMU-MIR-200C-3P	WANG_MMU-MIR-200C-3P; Prediction of both conserved and nonconserved microRNA targets in animals 2008.
LIT_MM_MAJKA_PMVEC_BMPR2R899X_DIFF	Genes differentially expressed in pulmonary microvascular endothelial cells(PMVEC) expressing the Bmpr2R899X mutation as compared to controls. (Table S2; Pubmed:21696628)
HPO_MM_ABNORMALITY_OF_THE_CEREBRUM	Abnormality of the cerebrum from HPO (Human Phenotype Ontology), data from GeneSetDB.
HPO_MM_INFANTILE_ONSET	Infantile onset from HPO (Human Phenotype Ontology), data from GeneSetDB.
LIT_MM_VENEZIA_ADULT_HEMATOPOIETIC-STEM-CELL_UP	Up-regulated in Adult HSC (Table S5; Pubmed:15459755)
MIRNA_MM_WANG_MMU-MIR-5616-3P	WANG_MMU-MIR-5616-3P; Prediction of both conserved and nonconserved microRNA targets in animals 2008.
LIT_MM_BLOMBERG_ITKANTI-CD3_VS_ITKC_ITKANTI-CD3_CD28_VS_ITKC_CD3-T-CELL_UP	UP_2393 probe-set overlapping upon anti-CD3- and anti-CD3/CD28-stimulations in Itk-defective CD3+ T-cells (Additional file 6; Pubmed:19450280)
MIRNA_MM_WANG_MMU-MIR-300-5P	WANG_MMU-MIR-300-5P; Prediction of both conserved and nonconserved microRNA targets in animals 2008.
LIT_MM_HAYBAECK_3M-TG1223_9M-TG1223_LIVER_UP	UP Comparison of non-supervised DNA-microarray analysis of 3 and 9 month-old tg1223 livers,The differentially up- and downregulated mRNAs expressed in 3 month-old tg1223 when compared to 9 month-old tg1223 livers are indicated. (Table S12; Pubmed:19800575)
LIT_MM_MACKIEWICZ_C8_CEREBRAL-CORTEX_SLEEP_DN	down-sleep-c8-diffrentially expressed between sleep and wakefulness in the cerebral cortex - FDR <1%; linear trend analysis for temporal pattern in gene expression - FDR <5% (Table S1; Pubmed:17698924)
LIT_MM_VIGORITO_MIR-155-DEFICIENT_B-CELL_DN	Downregulated mRNAs in miR-155-Deficient versus WT B Cells (Table S1; Pubmed:18055230)
HPO_MM_ABNORMALITY_OF_THE_FOREBRAIN	Abnormality of the forebrain from HPO (Human Phenotype Ontology), data from GeneSetDB.
LIT_MM_SCHREIBER_BEFORE_AFTER-MTBA_FVB_MACIL-10TG_LUNG_SUBCLUSTER-B_DIFF	Private set of genes regulated in lungs of FVB and macIL-10tg before and after infection with Mtba (Table S1 ; Pubmed:19561100)
LIT_MM_GAO_CDX2-DEFICIENCY_HIGH-STRINGENCY_MUTANT-E18.5_INTESTINE_DN	Using high-stringency gene classification, functional annotation of the expression profile of normal and mutant E18.5 intestines reveals that the gene category of ?vacuole and lysosome? has the highest enrichment score among the down-regulated genes, followed by ?transport function,? ?microbody and peroxisome,? ?protein trafficking,? and ?organelle membrane.? The statistical significance of the e…
MIRNA_MM_WANG_MMU-MIR-1971	WANG_MMU-MIR-1971; Prediction of both conserved and nonconserved microRNA targets in animals 2008.
MIRNA_MM_WANG_MMU-MIR-101A-3P	WANG_MMU-MIR-101A-3P; Prediction of both conserved and nonconserved microRNA targets in animals 2008.
MSIGDB_MM_MCBRYAN_PUBERTAL_BREAST_4_5WK_DN	Genes down-regulated during pubertal mammary gland development between week 4 and 5.
LIT_MM_KAWAZU_C57BL_6_DN-THYMOCYTE-DEVELOP_C4_DN3_DIFF	d_Clustering of differentially expressed genes during DN thymocyte development (Table S1; Pubmed:17911620)
MIRNA_MM_WANG_MMU-MIR-1968-5P	WANG_MMU-MIR-1968-5P; Prediction of both conserved and nonconserved microRNA targets in animals 2008.
LIT_MM_LU_OVA-ALLERGEN_PBS_ASTHMA_DIFF	Differentially expressed genes in murine asthma (Table S1; Pubmed:17437023)
MSIGDB_MM_ESC_J1_UP_EARLY.V1_UP	Genes up-regulated during early stages of differentiation of embryoid bodies from J1 embryonic stem cells.
LIT_MM_HANINA_TARGET-PREDICTIONS_6-MER-7-MER-8-ME_3-UTRS_DIFF	Sylamer list of microarray target predictions. The number of 6-mer, 7-mer and 8-mer in their 3? UTRs are indicated,we analysed the transcriptomes of Dicer1D/D+Ago2-myc ES cells transfected with miR-294 compared to Dicer1D/D+Ago2-myc ES cells transfected with a cel-239b control miRNA, which has minimal sequence identity to mouse miRNAs (Table S2; Pubmed:20975942)
MIRNA_MM_WANG_MMU-MIR-466A-5P	WANG_MMU-MIR-466A-5P; Prediction of both conserved and nonconserved microRNA targets in animals 2008.
LIT_MM_FANG_LACRIMAL-GLAND_CORNEAL-TRAUMA-ONCE_DIFF	Complete list of known genes with the number of times gene expression was significantly altered over multiple time points: once.--A Time Course Microarray Study of Gene Expression in the Mouse Lacrimal Gland after Acute Corneal Trauma (Table S1; Pubmed:15671270)
LIT_MM_HIRATANI_K-MEANS-CLUSTERS-OF-REPLICATION-TIMING_CLUSTER-11_DIFF	cluster-11 Lists of RefSeq genes that reside within K means clusters of replication timing 1-20 as defined in Figures 6-7 and their mRNA expression data (Table S3; Pubmed:19952138)
LIT_MM_FAZZIO_ESC_TIP60-KD_DN	Tip60_DN_genes differentially expressed in both Tip60 and p400 knockdown(KD) ESCs (Table S4; Pubmed:18614019)
LIT_MM_DING_P5-P13_DN	DN Comparison 6. P5 wild type vs. P13 wild type (1-AW, 5-CW, 9-EW, 11-FW) vs.(13-GW. 15-HW) (Table S3; Pubmed:20195375)
MIRNA_MM_WANG_MMU-MIR-452-3P	WANG_MMU-MIR-452-3P; Prediction of both conserved and nonconserved microRNA targets in animals 2008.
MIRNA_MM_WANG_MMU-MIR-3113-5P	WANG_MMU-MIR-3113-5P; Prediction of both conserved and nonconserved microRNA targets in animals 2008.
MIRNA_MM_WANG_MMU-MIR-302A-3P	WANG_MMU-MIR-302A-3P; Prediction of both conserved and nonconserved microRNA targets in animals 2008.
LIT_MM_DANG-DO_GCN2_METHIONINE-TREATED_INTO-POLYSOME_DIFF	List of genes whose mRNA shifted into polysomes following methionine deprivation treatmentin a GCN2-dependent manner. (Table S4A; Pubmed:19509078)
MIRNA_MM_WANG_MMU-MIR-3078-3P	WANG_MMU-MIR-3078-3P; Prediction of both conserved and nonconserved microRNA targets in animals 2008.
SIDER_MM_NEOPLASM	Neoplasm from SIDER (SIDe Effect Resource), data from GeneSetDB.
STITCH_MM_BERBERINE-CID100002353	berberine(CID100002353) from STITCH (Search Tool for Interactions of Chemicals), data from GeneSetDB.
LIT_MM_GLAUSER_GLUCOSE-CAMP_TARGET_PANCREATIC_METABOLIC_UP	up-Glucose and cAMP responsive targets were identified as described in material and methods.--pancreatic beta cells to metabolic stimulation (Table S1b; Pubmed:17587450)
MIRNA_MM_WANG_MMU-MIR-5117-3P	WANG_MMU-MIR-5117-3P; Prediction of both conserved and nonconserved microRNA targets in animals 2008.
GO_BP_MM_CARBOHYDRATE_METABOLIC_PROCESS	GO:0005975 ; GO Term Name: carbohydrate metabolic process ; GO domain: biological_process ; GO Evidence Code: IEA
MICROCOSM_TARGETS_MM_HSA-MIR-550	hsa-miR-550 from MicroCosm Targets, data from GeneSetDB.
STITCH_MM_RAPAMYCIN-CID005284616	rapamycin(CID005284616) from STITCH (Search Tool for Interactions of Chemicals), data from GeneSetDB.
LIT_MM_PHUC-LE_GLUCOCORTICOID-RECEPTOR_DIFF	differentially bound by the activated glucocorticoid receptor (Table S1; Pubmed:16110340)
SIDER_MM_URINARY_TRACT_INFECTION	Urinary tract infection from SIDER (SIDe Effect Resource), data from GeneSetDB.
LIT_MM_LAFFAIRE_TS1CJE_EUPLOID_CEREBELLUM_P10_UP	p10_UP_differentially expressed genes between Ts1Cje and euploid samples (Additional file 2; Pubmed:19331679)
MIRNA_MM_BETEL_MMU-MIR-3072	BETEL_MMU-MIR-3072; Good mirSVR score Non-conserved; The microRNA.org resource: targets and expression.
GO_CC_MM_MITOCHONDRIAL_MATRIX	GO:0005759 ; GO Term Name: mitochondrial matrix ; GO domain: cellular_component ; GO Evidence Code: IEA
LIT_MM_TANG_DICER-KO-MATURE-OOCYTE_ABARRAY_UP	Genes upregulated in Dicer knockout mature oocytes (Table S7; Pubmed:17369397)
LIT_MM_YANG_LIVER_MALE_GPX3-TRANSGENIC_DIFF	Liver gene expression signature of Gpx3 male tg at p<0.05 (Table S11; Pubmed:19270708)
LIT_MM_ZINMAN_INFECTION-VIRAL-BACTERIAL-PATHOGEN_DIFF	DE genes from Macaque arrays. Values are log2 transformed and represent the fold change from time = 0 --infection with two viral (PR8 and Fuj/02 influenza A) and two bacterial (Mycobacterium tuberculosis and Francisella tularensis Schu S4) pathogens (Table S2; Pubmed:21789257)
LIT_MM_SAJAN_IE_EML-ANALYSIS_DIFF	EML_Patterns within IE samples (Table S4; Pubmed:17660535)
LIT_MM_SALOMONIS_AES_AS_TERM_NP-UTERUS_UP	UP term_vs_NP uterus,NP,nonpregnant; MG, midgestation; PP, postpartum.Combined analysis of these datasets with the same AltAnalyze parameters showed a wide range in the number of predicted AEs(alternative exons),Resulting data for unique genes associated with AEs were compared for datasets indicative of AS(alternative splicing), Unique alternative exon profiles with ES cell differentiation (Datas…
LIT_MM_WRIGHT_PROXIMAL-TUBULE_CLCN5-KO_UP	UP_Proximal tubule Clcn5 knockout (Table S2; Pubmed:18349385)
LIT_MM_NABET_MPC-5-TRANSCRIPTOME-ELUATE_INPUT_DN	DN Complete list of all probesets that passed the expression filter and revealed differences in average expression between the eluate and input samples (Table S1; Pubmed:19652713)
LIT_MM_APRIL_UVB-RESPONSIVE_BASAL-EPIDERMIS-P2.5_UP	up-UVB-Responsive Genes in the +/+ Basal Epidermis of P2.5 Mice (Table S1; Pubmed:17222061)
LIT_MM_COPPIN_HFE_LIVER_C6_D2KO_D2WT_DN	cluster6_Genes regulated by Hfe disruption in D2 and/or B6 liver (Additional file 1; Pubmed:17945001)
LIT_MM_ZHANG_HDH-KO_HDH-HET_UP	UP_The list of genes significantly affected in Hdh-KO MEF cells. (Additional file 2; Pubmed:18412970)
LIT_MM_GERRITS_PRINCIPAL-EQTL_STATIC-EQTLS_DIFF	Static eQTLs Principal eQTL categories (Table S2; Pubmed:19834560)
LIT_MM_HUANG_GATA2_G1ME-CELL_UP	UP Differential gene expression in GATA2 knockdown G1ME cells (Table S2; Pubmed:19620289)
STITCH_MM_POLY_C-CID000006131	poly C(CID000006131) from STITCH (Search Tool for Interactions of Chemicals), data from GeneSetDB.
GO_MF_MM_HYDROLASE_ACTIVITY	GO:0016787 ; GO Term Name: hydrolase activity ; GO domain: molecular_function ; GO Evidence Code: IEA
MIRNA_MM_BETEL_MMU-MIR-711	BETEL_MMU-MIR-711; Good mirSVR score Non-conserved; The microRNA.org resource: targets and expression.
GO_CC_MM_NEURONAL_CELL_BODY	GO:0043025 ; GO Term Name: neuronal cell body ; GO domain: cellular_component ; GO Evidence Code: ISO
LIT_MM_BOCHKIS_FOXA2_LIVER_UP	Genome wide location analysis targets of Foxa2 in the liver.--fold change cutoff of 1.4. (Table S1; Pubmed:18660816)
LIT_MM_MACE_HOXA3_BMDCS_UP	STEM_90_sm_Supptab2 (Table S2; Pubmed:19544454)
CTD_MM_GLUTATHIONE	Glutathione from CTD (Comparative Toxicogenomics Database), data from GeneSetDB.
LIT_MM_SHIN_MYD88RIP2LP02_VS_LP03_DOT_ICM-DEPEND_UP	UP_Genes that exhibit two-fold or greater Dot/Icm-dependent transcriptional changes in Myd88?/?Rip2?/? macrophages but not in Myd88?/?Trif?/? macrophages. (Table S4; Pubmed:19043549)
CTD_MM_ARBUTIN	Arbutin from CTD (Comparative Toxicogenomics Database), data from GeneSetDB.
MIRNA_MM_WANG_MMU-MIR-19B-3P	WANG_MMU-MIR-19B-3P; Prediction of both conserved and nonconserved microRNA targets in animals 2008.
LIT_MM_SALOMONIS_AES_AS_TERM_QUIESCENT-UTERUS_UP	UP term_vs_quiescent_uterus,Combined analysis of these datasets with the same AltAnalyze parameters showed a wide range in the number of predicted AEs(alternative exons),Resulting data for unique genes associated with AEs were compared for datasets indicative of AS(alternative splicing), Unique alternative exon profiles with ES cell differentiation (Dataset S1; Pubmed:20498046)
GO_BP_MM_RESPONSE_TO_LIPOPOLYSACCHARIDE	GO:0032496 ; GO Term Name: response to lipopolysaccharide ; GO domain: biological_process ; GO Evidence Code: IMP
HPO_MM_DEVELOPMENTAL_DELAY	Developmental delay from HPO (Human Phenotype Ontology), data from GeneSetDB.
STITCH_MM_SP600125-CID100008515	SP600125(CID100008515) from STITCH (Search Tool for Interactions of Chemicals), data from GeneSetDB.
MIRNA_MM_GRIMSON_MIR-10ABC_10A-5P	GRIMSON_MIR-10ABC_10A-5P; Predicted_Targets_Info; MicroRNA Targeting Specificity in Mammals: Determinants beyond Seed Pairing.
LIT_MM_SALOMONIS_AES_AS_QUIESCENT_NP-UTERUS_DN	DN quiescent_vs_NP uterus,NP,nonpregnant; MG, midgestation; PP, postpartum.Combined analysis of these datasets with the same AltAnalyze parameters showed a wide range in the number of predicted AEs(alternative exons),Resulting data for unique genes associated with AEs were compared for datasets indicative of AS(alternative splicing), Unique alternative exon profiles with ES cell differentiation (…
STITCH_MM_POLY_C-CID100000314	poly C(CID100000314) from STITCH (Search Tool for Interactions of Chemicals), data from GeneSetDB.
LIT_MM_MOLYNEUX_C2_TUMOUR_BLG-CRE-BRCA1_P53_SOM_DN	C2-Low expression in tumours--Gene Expression Clusters in Blg-Cre Brca1f/f p53+/? Tumors Identified by SOM Analysis. (Table S4; Pubmed:20804975)
MIRNA_MM_WANG_MMU-MIR-1187	WANG_MMU-MIR-1187; Prediction of both conserved and nonconserved microRNA targets in animals 2008.
SIDER_MM_CREATININE_INCREASED	Creatinine increased from SIDER (SIDe Effect Resource), data from GeneSetDB.
MIRNA_MM_BETEL_MMU-MIR-465C-3P	BETEL_MMU-MIR-465C-3P; Good mirSVR score Non-conserved; The microRNA.org resource: targets and expression.
SIDER_MM_CONJUNCTIVITIS	Conjunctivitis from SIDER (SIDe Effect Resource), data from GeneSetDB.
LIT_MM_RENTHAL_SALINE-HDAC5KO_SALINE_DN	DN_List of Saline-Treated HDAC5 KO vs. Saline-Treated WT Significantly Regulated Genes (Table S4; Pubmed:17988634)
MIRNA_MM_WANG_MMU-MIR-5624-3P	WANG_MMU-MIR-5624-3P; Prediction of both conserved and nonconserved microRNA targets in animals 2008.
CTD_MM_ETOPOSIDE	Etoposide from CTD (Comparative Toxicogenomics Database), data from GeneSetDB.
LIT_MM_LOPES_XX_XO_LIVER_DIFF	Annotated probes differentially expressed between XX and XO mice in liver (P?0,05) (Table S1 ; Pubmed:20122165)
LIT_MM_JIANG_ESCELL_TRIPLE-RNAI_4D_DN	DN_4d_List of differentially expressed genes after Klf2, Klf4 and Klf5 depletion (Table S3; Pubmed:18264089)
MIRNA_MM_WANG_MMU-MIR-34C-3P	WANG_MMU-MIR-34C-3P; Prediction of both conserved and nonconserved microRNA targets in animals 2008.
LIT_MM_STEGMANN_LOW-ENDODERM_VS_MEDIUM-VILLI_PRIMO-DATABASE_UP	Genes that are up-regulated from a low level of expression in the endoderm to a medium level of expression in the villi and that have promoters in the PRIMO database. The fold change column indicates the up-regulation from endoderm to villus (Table S4; Pubmed:16868071)
LIT_MM_MACKIEWICZ_C3_CEREBRAL-CORTEX_SLEEP-UP_WAKE_DN	up-sleep-wake-down-c3-diffrentially expressed between sleep and wakefulness in the cerebral cortex - FDR <1%; linear trend analysis for temporal pattern in gene expression - FDR <5% (Table S1; Pubmed:17698924)
LIT_MM_MILENKOVIC_CURCUMIN_DN	down-Curcumin --- List of differentially expressed mRNAs (Table S5; Pubmed:22253797)
MICROCOSM_TARGETS_MM_HSA-MIR-18A	hsa-miR-18a from MicroCosm Targets, data from GeneSetDB.
MICROCOSM_TARGETS_MM_HSA-MIR-629	hsa-miR-629 from MicroCosm Targets, data from GeneSetDB.
MIRNA_MM_WANG_MMU-MIR-466K	WANG_MMU-MIR-466K; Prediction of both conserved and nonconserved microRNA targets in animals 2008.
LIT_MM_VAN-ERP_GROUP-D_C57BL_VS_6BMDM_VS_YERSINIA-INFECTION_DIFF	group D-differentially expressed genes [false discovery rate (FDR) cutoff 1.05%] in C57BL/6 BMDM in response to Yersinia infection. (Table 1; Pubmed:16352694)
LIT_MM_ZENG_8-CELL-TRANSIENT_PREIMPLANTATION_DIFF	Genes with 8-cell transient expression profile (Table S2-E; Pubmed:15282163)
LIT_MM_FANG_LACRIMAL-GLAND_CORNEAL-TRAUMA-3TIMES_DIFF	Complete list of known genes with the number of times gene expression was significantly altered over multiple time points: three times. (Table S1; Pubmed:15671270)
MIRNA_MM_WANG_MMU-MIR-3090-3P	WANG_MMU-MIR-3090-3P; Prediction of both conserved and nonconserved microRNA targets in animals 2008.
MSIGDB_MM_PILON_KLF1_TARGETS_DN	Genes down-regulated in erythroid progenitor cells from fetal livers of E13.5 embryos with KLF1 [GeneID=10661] knockout compared to those from the wild type embryos.
MIRNA_MM_BETEL_MMU-MIR-465B-3P	BETEL_MMU-MIR-465B-3P; Good mirSVR score Non-conserved; The microRNA.org resource: targets and expression.
SIDER_MM_RIGORS	Rigors from SIDER (SIDe Effect Resource), data from GeneSetDB.
LIT_MM_MAGOLD_GAMMA-SCRETASE_INHIBITED-GAMMA-SECRETASE_EST-CLONES_UP	EST clones with increased transcription under enhanced ?-scretase activity compared to inhibited ?-secretase activity (Dataset S1; Pubmed:19763259)
HPO_MM_ABNORMALITY_OF_CARBOHYDRATE_METABOLISM_HOMEOSTASIS	Abnormality of carbohydrate metabolism/homeostasis from HPO (Human Phenotype Ontology), data from GeneSetDB.
LIT_MM_KENDRICK_LUMINAL-ER-CELL-PLUS_DIFF	Genes characteristic of luminal ER+ cells. (Table S6; Pubmed:19063729)
MIRNA_MM_BETEL_MMU-MIR-872	BETEL_MMU-MIR-872; Good mirSVR score Non-conserved; The microRNA.org resource: targets and expression.
STITCH_MM_SP600125-CID000008515	SP600125(CID000008515) from STITCH (Search Tool for Interactions of Chemicals), data from GeneSetDB.
LIT_MM_LIN_FOXP3EGFP-PLUS_FOXP3EGFP-PLUS_UP
MIRNA_MM_WANG_MMU-MIR-201-3P	WANG_MMU-MIR-201-3P; Prediction of both conserved and nonconserved microRNA targets in animals 2008.
LIT_MM_SHAROVA_CORRELATED-NEGATIVELY-PC1_DIFF	Genes whose expession correlated negatively with PC1 in Fig. 2 and can be considered luripotency-related?(Table S4; Pubmed:17560561)
LIT_MM_MILENKOVIC_QUERCETIN_DN	down-Quercetin --- List of differentially expressed mRNAs (Table S5; Pubmed:22253797)
LIT_MM_KAWAZU_C57BL_6_DN-THYMOCYTE-DEVELOP_C2_DN2_DN3-DN4_UP	b_Clustering of differentially expressed genes during DN thymocyte development (Table S1; Pubmed:17911620)
STITCH_MM_S-ADENOSYL-L-METHIONINE-CID000034755	S-adenosyl-L-methionine(CID000034755) from STITCH (Search Tool for Interactions of Chemicals), data from GeneSetDB.
LIT_MM_TIMMONS_DIFFERENTIATION_BROWN-PREADIPOCYTE-UNIQUE_UP	UP_BAT-unique_Overlapping gene list from brown and white preadipoctyes modulated during differentiation (Dataset S3; Pubmed:17360536)
MIRNA_MM_WANG_MMU-MIR-1948-3P	WANG_MMU-MIR-1948-3P; Prediction of both conserved and nonconserved microRNA targets in animals 2008.
LIT_MM_RENTHAL_COCAINE_FOSB_ACH3_ACH4_UP	?fosB and acH3/acH4 up Cocaine regulation of histone modifications at ?FosB target genes (Table S8; Pubmed:19447090)
LIT_MM_SUSZTAK_MESANGIAL-MATRIX_VS_MINIMALMESANGIAL_DIFF	differentially expressed genes identified by SAM analysis when animals with advanced mesangial matrix expansion compared to mice with minimal mesangial expansion (Table S3B; Pubmed:14988265)
LIT_MM_MOSCHELLA_BONE-MARROW_CTX_1-2D_UP	UP_List of the genes modulated 1-2 days after CTX in the bone marrow (Table S1; Pubmed:21444678)
MIRNA_MM_BETEL_MMU-MIR-150_1	BETEL_MMU-MIR-150_1; Good mirSVR score Conserved; The microRNA.org resource: targets and expression.
LIT_MM_BELMONT_HEART_ATF6_UP	UP_Complete List of Genes Induced by ATF6 (Table S1; Pubmed:18319259)
MSIGDB_MM_GRAESSMANN_APOPTOSIS_BY_SERUM_DEPRIVATION_UP	Genes up-regulated in ME-A cells (breast cancer) undergoing apoptosis upon serum starvation (5% to 0% FCS) for 22 hr.
MIRNA_MM_BETEL_MMU-MIR-465A-3P	BETEL_MMU-MIR-465A-3P; Good mirSVR score Non-conserved; The microRNA.org resource: targets and expression.
STITCH_MM_NADP-H-CID100000930	NADP(H)(CID100000930) from STITCH (Search Tool for Interactions of Chemicals), data from GeneSetDB.
MIRNA_MM_WANG_MMU-MIR-101B-3P	WANG_MMU-MIR-101B-3P; Prediction of both conserved and nonconserved microRNA targets in animals 2008.
LIT_MM_MOTOYAMA_LIVER_ISOLATION-STRESS_30D_UP	202 up-regulated genes in the mice liver of isolation stress for 30 days (Table S1; Pubmed:19106182)
HPO_MM_ABNORMAL_GLUCOSE_HOMEOSTASIS	Abnormal glucose homeostasis from HPO (Human Phenotype Ontology), data from GeneSetDB.
LIT_MM_HUNTER_AKR_DBA_LUNG_DIFF	Mouse AKR vs DBA lung gene list (Table S7; Pubmed:19118016)
LIT_MM_HUTTMANN_LT-HSC_UP	induced LT-HSC (Table S2; Pubmed:16574753)
LIT_MM_XU-CNS_6-16M_16-24M_P4_DIFF	Gene lists of mouse CNS age-related gene expression pattern 4 (Table S2aP4; Pubmed:17988385)
SIDER_MM_KERATITIS	Keratitis from SIDER (SIDe Effect Resource), data from GeneSetDB.
MICROCOSM_TARGETS_MM_HSA-MIR-877	hsa-miR-877 from MicroCosm Targets, data from GeneSetDB.
MIRNA_MM_WANG_MMU-MIR-32-3P	WANG_MMU-MIR-32-3P; Prediction of both conserved and nonconserved microRNA targets in animals 2008.
MICROCOSM_TARGETS_MM_HSA-MIR-214	hsa-miR-214 from MicroCosm Targets, data from GeneSetDB.
LIT_MM_ESCUDERO_MOCK_VP16_KK1-CELL_DN	DN Pairwise analysis of differentially expressed genes in KK1 cells. Group NA: mock vs. VP16 (Addi. file 1; Pubmed:20167115)
LIT_MM_MARET_BRAIN_SLEEP-DEPRIVATION_INDEPENT-OF-TIME-OF-DAY_UP	UP_Genes affected by sleep deprivation independent of time-of-day (Table S5; Pubmed:18077435)
LIT_MM_GILCHRIST_C2_TLR-ACTIVATED-MACROPHAGE_ATF3_DIFF	k-means cluster 2 from LPS stimulated macrophages--Here we use cluster analysis of a comprehensive set of transcriptomic data derived from Toll-like receptor (TLR)-activated macrophages to identify a prominent group of genes that appear to be regulated by activating transcription factor 3 (ATF3), a member of the CREB/ATF family of transcription factors. (Table S1; Pubmed:16688168)
MIRNA_MM_WANG_MMU-MIR-5617-5P	WANG_MMU-MIR-5617-5P; Prediction of both conserved and nonconserved microRNA targets in animals 2008.
MIRNA_MM_WANG_MMU-MIR-295-3P	WANG_MMU-MIR-295-3P; Prediction of both conserved and nonconserved microRNA targets in animals 2008.
LIT_MM_DELAHAYE_CEREBRAL-MALARIA_TIME-POINTS_DIFF	CM-specific genes obtained by use of the Welch t test and a Bonferroni correction--between early and late infection stages, between mouse strains, and between CM-R and CM-S mice--cerebral malaria-susceptible (Table 2; Pubmed:18062806)
LIT_MM_GHAZALPOUR_MF1_LIVER_FDR01_DISTANT-EQTL_DIFF	distant(trans)_1%_Cis and trans eQTL at 1%, 5%, 10%, and 25% FDR (Table S1; Pubmed:18688273)
LIT_MM_SCHLUTER_OXIDATIVE-STRESS_DIFF	List of 407 genes related to oxidative stress. (Table S5; Pubmed:22095690)
LIT_MM_APRIL_NON-OVERLAPPING_UVB-RESPONSIVE_BASAL-EPIDERMIS-P2.5_UP	up-Non-Overlapping UVB-Responsive Genes in the +/+ Basal Epidermis of P2.5 (Table S7; Pubmed:17222061)
STITCH_MM_CURCUMIN-CID100002889	curcumin(CID100002889) from STITCH (Search Tool for Interactions of Chemicals), data from GeneSetDB.
LIT_MM_CUI_CLASS5_LMN_VS_IML_DIFF	Class V: Genes that are differentially expressed between LMN and IML (472) (Table S1; Pubmed:16317082)
LIT_MM_KARANTZALI_ESC_NANOG_SPECIFFIC-TARGET_DIFF	Nanog_Gene targets of Sall1 and Nanog (Table S1; Pubmed:21062744)
SIDER_MM_CONVULSION	Convulsion from SIDER (SIDe Effect Resource), data from GeneSetDB.
LIT_MM_HU_ESCELL_OCT4GIP_OCT4_DIFFERENTIATION_SIRNAS_DIFF	genes scored with one or more siRNAs (Table S1; Pubmed:19339689)
MIRNA_MM_WANG_MMU-MIR-3083-5P	WANG_MMU-MIR-3083-5P; Prediction of both conserved and nonconserved microRNA targets in animals 2008.
LIT_MM_SOKOLOVIC_FASTING_INTESTINE_12H_UP	12h Ups_Fold changes in response to fasting (Additional file 1; Pubmed:17925015)
HPO_MM_APLASIA_HYPOPLASIA_INVOLVING_THE_CENTRAL_NERVOUS_SYSTEM	Aplasia/Hypoplasia involving the central nervous system from HPO (Human Phenotype Ontology), data from GeneSetDB.
LIT_MM_WANG_E17.5_PLACENTA_CANDIDATE-IMPRINTED-GENE_DIFF	Candidate imprinted genes in mouse placenta (Table S1; Pubmed:21705755)
LIT_MM_GILLICH_PRDM14_EPISCS_VS_CONTROL_UP	Downregulated genes upon Prdm14 overexpression in EpiSCs compared to vector control (Table S1; Pubmed:22482507)
MSIGDB_MM_BOYLAN_MULTIPLE_MYELOMA_C_D_UP	Genes up-regulated both in group C and D of tumors arising from overexpression of BCL2L1 and MYC [GeneID=598;4609] in plasma cells.
HPO_MM_ABNORMALITY_OF_THE_LUNG	Abnormality of the lung from HPO (Human Phenotype Ontology), data from GeneSetDB.
LIT_MM_ZIMMER_C-IA_DEVELOPMENTAL-NEUROTOXICITY_DIFF	Cluster Ia--Complete listing of the assignment of genes to the different clusters--Cluster analysis of expression kinetics, and bioinformatic identification of verrepresented gene ontologies revealed waves of regulation relevant for DNT testing--developmental neurotoxicity. (Fig.S3; Pubmed:20865013)
REACTOME_MM_ERBB3_PATHWAY	Genes that interact with the gene ERBB3, which was extracted from FIsInGene_Pathway_041709 in the REACTOME.
LIT_MM_XU_PROLIFERATION_AKT1_DIFF	List of significant genes correlating with BrdU profile (Table S1; Pubmed:17978178)
LIT_MM_MITIKU_POSTIMPLANTATION-EMBRYOGENEIS_E7.75-E8.0A_UP	E7.75-E8.0a_Genes Increasing more than 3-fold on each Interval (Table S2; Pubmed:18061570)
LIT_MM_TAKAMI_METLIVKO_5M_DEN-TREATMENT_UP	Genes over-expressed in MetLivKO at 5 months after DEN treatment (P<0.001) (Table S1; Pubmed:17942915)
SIDER_MM_IMMUNE_SYSTEM_DISORDER	Immune system disorder from SIDER (SIDe Effect Resource), data from GeneSetDB.
LIT_MM_MCWHIRTER_C-DI-GMP_DNA_DIFF	Microarrays of genes induced by transfected c-di-GMP or transfected DNA (poly AT:TA) (Table S1; Pubmed:19652017)
MIRNA_MM_WANG_MMU-MIR-5108	WANG_MMU-MIR-5108; Prediction of both conserved and nonconserved microRNA targets in animals 2008.
MIRNA_MM_BETEL_MMU-MIR-466F	BETEL_MMU-MIR-466F; Good mirSVR score Non-conserved; The microRNA.org resource: targets and expression.
MIRNA_MM_WANG_MMU-MIR-146B-5P	WANG_MMU-MIR-146B-5P; Prediction of both conserved and nonconserved microRNA targets in animals 2008.
MIRNA_MM_WANG_MMU-MIR-743B-3P	WANG_MMU-MIR-743B-3P; Prediction of both conserved and nonconserved microRNA targets in animals 2008.
LIT_MM_HU_CTMZ_COMMON-TARGET_DIFF	GO analysis (Ingenuity Pathway Analysis) of common target genes of Cnot3rim28-Mycfx(CTMZ) (Table S4; Pubmed:19339689)
MIRNA_MM_WANG_MMU-MIR-344E-3P	WANG_MMU-MIR-344E-3P; Prediction of both conserved and nonconserved microRNA targets in animals 2008.
LIT_MM_COPPIN_HFE_LIVER_C3_B6KO_B6WT_UP	cluster3_Genes regulated by Hfe disruption in D2 and/or B6 liver (Additional file 1; Pubmed:17945001)
GENESIGDB_MM_FORNONI_03_LUNG_NOT_CANCER	Mouse Lung_not_cancer_Fornoni03_175genes; 14514645-Figure6; data from GeneSigDB: http://compbio.dfci.harvard.edu/genesigdb/download/ALL_SIGSv4.gmt.
LIT_MM_AGARWAL_IL-12-AG-B7_IFNA-AG-B7_TSA-AG-B7_CD8-T-CELL_DIFF	Genes regulated in common by IL-12, IFNa and trichostatin A (Table S VII; Pubmed:19592655)
MIRNA_MM_WANG_MMU-MIR-669M-3P	WANG_MMU-MIR-669M-3P; Prediction of both conserved and nonconserved microRNA targets in animals 2008.
LIT_MM_REYMANN_LUNG-ADENOCARCINOMAS_C-MYC-TRANSGENIC_TFS_SILICO_PUTATIVE-C-MYC-TARGET_DIFF	Putative target genes of c-Myc and of transcription factors the expression of which was induced by c-Myc (Additional file 9; Pubmed:18498649)
MIRNA_MM_WANG_MMU-MIR-146A-5P	WANG_MMU-MIR-146A-5P; Prediction of both conserved and nonconserved microRNA targets in animals 2008.
LIT_MM_MARQUES_26W_SCHLAGER_HYPERTENSIVE_HYPOTHALAMUS_FDR05_UP	UP_Gene expression profile for hypothalamus of 26 week-old Schlager hypertensive mice, after false discovery rate adjustment of less than 0.05. (Table S7; Pubmed:21487032)
MIRNA_MM_WANG_MMU-MIR-879-5P	WANG_MMU-MIR-879-5P; Prediction of both conserved and nonconserved microRNA targets in animals 2008.
LIT_MM_GOVONI_24H-GH-TREATMENT_DN	down-24h--Genes that are significantly different from the controls at 6 or 24 hours after GH treatment (Table S; Pubmed:16464905)
LIT_MM_MACLENNAN_LIVER_GYK-KO_DOL3_DN	Genes in the dol3 black network module with Module Membership of 0.8 or higher. (Table S1C; Pubmed:19546021)
MIRNA_MM_WANG_MMU-MIR-374-5P	WANG_MMU-MIR-374-5P; Prediction of both conserved and nonconserved microRNA targets in animals 2008.
MIRNA_MM_WANG_MMU-LET-7F-2-3P	WANG_MMU-LET-7F-2-3P; Prediction of both conserved and nonconserved microRNA targets in animals 2008.
LIT_MM_MITO_SYNOVIAL-SARCOMA_MUSCLE_DIFF	Geneset derived from mouse model of synovial sarcoma versus control (normal muscle). Geneset was derived using signal-to-noise metric (Table S1; Pubmed:19956606)
MIRNA_MM_WANG_MMU-MIR-3078-5P	WANG_MMU-MIR-3078-5P; Prediction of both conserved and nonconserved microRNA targets in animals 2008.
MICROCOSM_TARGETS_MM_HSA-MIR-144	hsa-miR-144 from MicroCosm Targets, data from GeneSetDB.
STITCH_MM_URIDINE_TRIPHOSPHATE-CID000006133	uridine triphosphate(CID000006133) from STITCH (Search Tool for Interactions of Chemicals), data from GeneSetDB.
MICROCOSM_TARGETS_MM_HSA-MIR-25	hsa-miR-25 from MicroCosm Targets, data from GeneSetDB.
MIRNA_MM_WANG_MMU-MIR-467B-3P	WANG_MMU-MIR-467B-3P; Prediction of both conserved and nonconserved microRNA targets in animals 2008.
MSIGDB_MM_RB_DN.V1_UP	Genes up-regulated in primary keratinocytes from RB1 [Gene ID=5925] skin specific knockout mice.
SIDER_MM_ANAPHYLACTOID_REACTION	Anaphylactoid reaction from SIDER (SIDe Effect Resource), data from GeneSetDB.
MSIGDB_MM_PASQUALUCCI_LYMPHOMA_BY_GC_STAGE_DN	Genes down-regulated in post-GC, BCL6 [GeneID=604] dependent B cell non-Hodgkin's lymphoma (B-NHL) vs MYC [GeneID=4609] driven pre-GC lymphoma.
MIRNA_MM_WANG_MMU-MIR-876-5P	WANG_MMU-MIR-876-5P; Prediction of both conserved and nonconserved microRNA targets in animals 2008.
MIRNA_MM_WANG_MMU-MIR-3084-3P	WANG_MMU-MIR-3084-3P; Prediction of both conserved and nonconserved microRNA targets in animals 2008.
STITCH_MM_URIDINE_TRIPHOSPHATE-CID100001181	uridine triphosphate(CID100001181) from STITCH (Search Tool for Interactions of Chemicals), data from GeneSetDB.
LIT_MM_MAJEWSKI_SUZ12PLT8MPL-MINUS_ADULT-LSK_DN	DN Adult LSK Suz12Plt8/+ Mpl-/- vs wild-type log-ratios,Fetal and adult LSK log-ratios (Table S4; Pubmed:20445021)
MIRNA_MM_BETEL_MMU-MIR-376A_1	BETEL_MMU-MIR-376A_1; Good mirSVR score Non-conserved; The microRNA.org resource: targets and expression.
LIT_MM_DOSS_PUROMYCIN-TREATED_15D_BETA-ACTIN-EBS_UP	up-differentially regulated in the puromycin treated 15-day-old ?-actin+ EBs. (Table 11; Pubmed:17428332)
LIT_MM_GENANDER_EPHRIN-B2-FC_12H_UP	Ephrin-B2-Fc 12 hours upregulated genes (Table S1; Pubmed:19914164)
MIRNA_MM_WANG_MMU-MIR-381-3P	WANG_MMU-MIR-381-3P; Prediction of both conserved and nonconserved microRNA targets in animals 2008.
GO_BP_MM_INTRACELLULAR_PROTEIN_TRANSPORT	GO:0006886 ; GO Term Name: intracellular protein transport ; GO domain: biological_process ; GO Evidence Code: IEA
CTD_MM_IBUPROFEN	Ibuprofen from CTD (Comparative Toxicogenomics Database), data from GeneSetDB.
LIT_MM_MOULOS_MOIL_12H_DMSO_DN	DN Moil_12h/DMSO List of 925 differentially expressed genes in response to mastic oil. The list of 925 differentially expressed genes and their cluster memberships as derived after statistical and clustering analysis as described in Methods. Several annotation elements such as GenBank accession numbers and RefSeq IDs are included together with fold change ratios for each differentially expressed …
LIT_MM_WELLS_LPS-INDUCIBLE_BALB-C_C3H-ARC_NOT-C3H-HEJ-STRAIN_DIFF	Stimulation with LPS led to a remodeling of macrophage gene expression, and 373 probes were LPS-inducible in the LPS responsive strains, BALB/c and C3H/ARC, but not the hyporesponsive C3H/HeJ strain (Table S2; Pubmed:12819134)
LIT_MM_SHIN_MYD88TRIFLP02_VS_LP03_MYD88RIP2LP02_VS_LP03_DOT_ICM-DEPEND_UP	UP_Genes that exhibit two-fold or greater Dot/Icm dependent transcriptional changes in both Myd88-/-Trif-/- and Myd88-/-Rip2-/- macrophages (Table S2; Pubmed:19043549)
LIT_MM_HOOGERWERF_COLON_OVER-8AM_RHYTHMICAL_C1_DIFF	cluster1_original array intensity data expressed as fold change over 8 AM (ZT1) time-point (Table Supplement; Pubmed:18848557)
LIT_MM_MARSON_FOXP3-DEPENDENT_EX_VIVO_HYBRIDOMA-CELL_DIFF	Genes with consistent Foxp3 dependant differential expression genes in ex vivo and hybridoma cells (Table S10; Pubmed:17237765)
HPO_MM_ABNORMALITY_OF_THE_OUTER_EAR	Abnormality of the outer ear from HPO (Human Phenotype Ontology), data from GeneSetDB.
STITCH_MM_CURCUMIN-CID000969516	curcumin(CID000969516) from STITCH (Search Tool for Interactions of Chemicals), data from GeneSetDB.
LIT_MM_LIN_E2A_DN	DN E2A and FOXO1 regulated genes (Table S4; Pubmed:20543837)
LIT_MM_HOLLOWAY_LIVER_HNF4A-DEPEND_SEX-SPECIFIC_DIFF	Expression ratios for all 646 HNF4a-dependent sex-specific genes (Table S1B; Pubmed:18276827)
MIRNA_MM_WANG_MMU-MIR-764-3P	WANG_MMU-MIR-764-3P; Prediction of both conserved and nonconserved microRNA targets in animals 2008.
STITCH_MM_N-ACETYLCYSTEINE-CID000012035	N-acetylcysteine(CID000012035) from STITCH (Search Tool for Interactions of Chemicals), data from GeneSetDB.
LIT_MM_HANADA_FIBULIN-R-R_UP	up-Fibulin-R-R_UP (Table S4; Pubmed:17293478)
LIT_MM_LEE_BDC-CD4-TCELL_TNF_PBS_UP	genes display significant up-regulation by TNF treatment (Dataset S1; Pubmed:18632574)
MIRNA_MM_WANG_MMU-MIR-199B-5P	WANG_MMU-MIR-199B-5P; Prediction of both conserved and nonconserved microRNA targets in animals 2008.
LIT_MM_DANG-DO_PERK_2-4-DI-TERT-BUTYLHYDROQUINONE_OUT-OF-POLYSOME_DIFF	List of genes whose mRNA shifted out of polysomes following 2,4-di-tert-butylhydroquinone treatment in a PERK-dependent manner. (Table S5B; Pubmed:19509078)
MSIGDB_MM_VANOEVELEN_MYOGENESIS_SIN3A_TARGETS	Loci bound exclusively by SIN3A [GeneID=25942] in myotubules.
LIT_MM_NASCIMENTO_RASD2_DIFF	Rasd2-like regulated genes (Table S3; Pubmed:22101514)
LIT_MM_LUCI_SPLEEN_GUT_SKIN_NKP46-CD3-CELL_C1_DIFF	cluster1_List of genes included in clusters 1, 2, 7 and 8 (Table S1; Pubmed:19029904)
LIT_MM_LI_12H_2-3-PH_LIVER_UP	up-12h-Differentially expressed genes after 2/3 PH relative to normal liver (Table S3; Pubmed:19700759)
MSIGDB_MM_IVANOVA_HEMATOPOIESIS_MATURE_CELL	Genes in the expression cluster 'MBC Shared': up-regulated in mature blood cell populations from adult bone marrow and fetal liver.
SIDER_MM_PLATELET_COUNT_DECREASED	Platelet count decreased from SIDER (SIDe Effect Resource), data from GeneSetDB.
LIT_MM_SANDA_NOTCH1_T-ALL_POLYCLONAL-DPCELL_NORMAL_G1_UP	group1_Differentially expressed genes in a Notch1-induced mouse model of T-ALL (Table S2; Pubmed:20007543)
LIT_MM_SMEETS_PPARALPHA-TAC_SHAM_DN	DN_List of 1824 probeset only present in PPAR?-/- TAC versus PPAR?-/- sham (Table SIV; Pubmed:18812456)
LIT_MM_SAMAL_ADRENAL-GLAND_PACAP-RESPONSE-TRANSCRIPT_UP	MAG Transcripts (Table S1; Pubmed:17651866)
GO_BP_MM_CELL_DIFFERENTIATION	GO:0030154 ; GO Term Name: cell differentiation ; GO domain: biological_process ; GO Evidence Code: IEA
GENESIGDB_MM_SCHIMMER_06_STEM_CELL_1	Mouse StemCell_Schimmer06_588genes; 16484322-SuppTable1; data from GeneSigDB: http://compbio.dfci.harvard.edu/genesigdb/download/ALL_SIGSv4.gmt.
LOC_MM_CHR2_H1	Genes in cytogenetic band chr2_H1
MIRNA_MM_WANG_MMU-MIR-302C-3P	WANG_MMU-MIR-302C-3P; Prediction of both conserved and nonconserved microRNA targets in animals 2008.
MIRNA_MM_BETEL_MMU-MIR-15A_1	BETEL_MMU-MIR-15A_1; Good mirSVR score Conserved; The microRNA.org resource: targets and expression.
LIT_MM_TOSCANO_CEREBRAL-CORTEX_COX1-KO_COX2KO_DIFF	Differentially Expressed in the Cerebral Cortex of COX 1 and COX 2 Kos (Table S1; Pubmed:17266762)
MIRNA_MM_WANG_MMU-MIR-25-3P	WANG_MMU-MIR-25-3P; Prediction of both conserved and nonconserved microRNA targets in animals 2008.
LIT_MM_KIM_KCL-6H_CORTICAL-NEURONS_DN	DN list of genes with expression changes that were significant following 6 hours KCl stimulation, based on RNA-Seq biological replicate 1 (Table S8; Pubmed:20393465)
MIRNA_MM_WANG_MMU-MIR-201-5P	WANG_MMU-MIR-201-5P; Prediction of both conserved and nonconserved microRNA targets in animals 2008.
LIT_MM_BATTLE_GATA4-NULL_JEJUNUM_UP	UP_Genes with expression altered by ? 2.0 FOLD ( P ? 0.05) IN GATA4 null jejunum (Table S4; Pubmed:18812176)
LIT_MM_MOULOS_MOIL_12H_DMSO_UP	UP Moil_12h/DMSO List of 925 differentially expressed genes in response to mastic oil. The list of 925 differentially expressed genes and their cluster memberships as derived after statistical and clustering analysis as described in Methods. Several annotation elements such as GenBank accession numbers and RefSeq IDs are included together with fold change ratios for each differentially expressed …
LIT_MM_BRAY_CCM_ATRIA_DN	DN_Atria_Genes identified as potentially being regulated by the circadian clock within the atrial and ventricular cardiomyocytes (Table S3; Pubmed:18156197)
HPO_MM_ABNORMALITY_OF_BONE_MINERAL_DENSITY	Abnormality of bone mineral density from HPO (Human Phenotype Ontology), data from GeneSetDB.
MIRNA_MM_BETEL_MMU-MIR-1929	BETEL_MMU-MIR-1929; Good mirSVR score Conserved; The microRNA.org resource: targets and expression.
LIT_MM_KWON_IL-21_CANDIDATE-REGULATING-STAT3-BINDING-SITE-WITHIN-THE-GENE_CD4-T-CELL_DIFF	Genes Differentially Expressed upon IL-21 Treatment and Containing a Candidate Regulating STAT3-Binding Site within the Gene (Table S6; Pubmed:20064451)
LIT_MM_CHEN_MLL-AF9_DN	Genes under-expressed in all Mll-AF9 populations (Table S2; Pubmed:18455126)
LIT_MM_GHAZALPOUR_MF1_LIVER_FDR25_DISTANT-EQTL_DIFF	distant(trans)_25%_Cis and trans eQTL at 1%, 5%, 10%, and 25% FDR (Table S1; Pubmed:18688273)
LIT_MM_ZAHN_C57BL_6_EYE_AGE_DIFF	Eye_Genes age-regulated in individual mouse tissues (Table S2; Pubmed:18081424)
LIT_MM_TEMPLETON_PC1_RETINA_DIFF	Genes of Principal Component 1 (PC1) (Table S5; Pubmed:19643015)
LIT_MM_ESCUDERO_MOCK_FOXL2-VP16_FODL2-MAD_DIFF	Combined analysis of differentially expressed genes in KK1 cells. Normal: mock transfected. Activated: Foxl2-VP16 transfected. Repressed: Fodl2-Mad transfected (Addi. file 5; Pubmed:20167115)
LIT_MM_DING_ESC_CTR9-BINDING-GENE_DIFF	Ctr9 Binding in ESCs (Table S5; Pubmed:19345177)
LIT_MM_LEE_HUNTINGTIN_POLYGLUTAMINE-TRACT_STRIATAL-CELL_UP	Increased in mutant compared to wild-type striatal cells. (Table S1; Pubmed:17708681)
LIT_MM_HAWKINS_COCHLEA-NEOMYCIN_DIFF	Cochlea Neomycin Differential Expression>1.2-fold and P< = 0.05 (Table S6; Pubmed:17565378)
TF_MM_FRIARD_LEF1	Target genes of transcription factor LEF1, predicted by CircuitsDB
MIRNA_MM_WANG_MMU-MIR-672-3P	WANG_MMU-MIR-672-3P; Prediction of both conserved and nonconserved microRNA targets in animals 2008.
LIT_MM_POTIREDDY_MMRNA_LATE-1-CELL-EMBRYOS_UP	Functional categorization of the MmRNAs enhanced in the translatome of late one-cell embryos. (Table S3; Pubmed:16860309)
MIRNA_MM_WANG_MMU-MIR-297B-5P	WANG_MMU-MIR-297B-5P; Prediction of both conserved and nonconserved microRNA targets in animals 2008.
MSIGDB_MM_RAO_BOUND_BY_SALL4_ISOFORM_B	Loci bound exclusively by SALL4 [GeneID=57167] isoform b in ES cells (embryonic stem).
CTD_MM_DACTINOMYCIN	Dactinomycin from CTD (Comparative Toxicogenomics Database), data from GeneSetDB.
LIT_MM_DRISKELL_GFP-CD133-PLUS_VS_GFP-CD133-PLUS_GFP-CD133-MINUS_DN	DN Genes differentially expressed in GFP? CD133+ compared with GFP+ CD133+ and GFP? CD133? dermal cells (Table S3; Pubmed:19605494)
LIT_MM_NIEDERNHOFER_ERCC1_GENOTOXIC-STRESS_DN	down-Extensive overview of signficant expression changes in Ercc1 -/- mice relative to wild-type littermates-genotoxic stress (Table S3; Pubmed:17183314)
GO_BP_MM_POSITIVE_REGULATION_OF_CELL_MIGRATION	GO:0030335 ; GO Term Name: positive regulation of cell migration ; GO domain: biological_process ; GO Evidence Code: IEA
MIRNA_MM_WANG_MMU-MIR-542-3P	WANG_MMU-MIR-542-3P; Prediction of both conserved and nonconserved microRNA targets in animals 2008.
LIT_MM_RAWLS_M-MICE_VS_GF-MICE_NOT-Z-MICE_VS_GF-MICE_UP	up-Mouse transcripts recognized by GeneChip probesets that are differentially expressed in M-mice compared to GF mice, but not in Z-mice compared to GF mice (Table S4; Pubmed:17055441)
LIT_MM_MOULOS_MOIL_6H_DMSO_UP	UP Moil_6h/DMSO List of 925 differentially expressed genes in response to mastic oil. The list of 925 differentially expressed genes and their cluster memberships as derived after statistical and clustering analysis as described in Methods. Several annotation elements such as GenBank accession numbers and RefSeq IDs are included together with fold change ratios for each differentially expressed g…
MIRNA_MM_GRIMSON_MIR-18AB_4735-3P	GRIMSON_MIR-18AB_4735-3P; Predicted_Targets_Info; MicroRNA Targeting Specificity in Mammals: Determinants beyond Seed Pairing.
MIRNA_MM_WANG_MMU-MIR-760-5P	WANG_MMU-MIR-760-5P; Prediction of both conserved and nonconserved microRNA targets in animals 2008.
MIRNA_MM_WANG_MMU-MIR-3089-3P	WANG_MMU-MIR-3089-3P; Prediction of both conserved and nonconserved microRNA targets in animals 2008.
LIT_MM_LIU_TGFBETA_SIGNATURE_DN	DN Gene signature for TGF? pathway (Addi.l data file 1; Pubmed:?9094238)
HPO_MM_SEIZURES	Seizures from HPO (Human Phenotype Ontology), data from GeneSetDB.
LIT_MM_PINENT_HSL_BAT_UP	up-HSL-BAT (Table S1; Pubmed:18572100)
LIT_MM_AGARWAL_IFNA-AG-B7_AG-B7-ONLY_NAIVE-CD8-T-CELL_DIFF	IFNa - dependent gene expression changes (IFNa + Ag-B7 versus Ag-B7 only) (Table S III; Pubmed:19592655)
MIRNA_MM_WANG_MMU-MIR-147-5P	WANG_MMU-MIR-147-5P; Prediction of both conserved and nonconserved microRNA targets in animals 2008.
HPO_MM_ABNORMALITY_OF_THE_ANTERIOR_SEGMENT_OF_THE_EYE	Abnormality of the anterior segment of the eye from HPO (Human Phenotype Ontology), data from GeneSetDB.
MICROCOSM_TARGETS_MM_HSA-MIR-541	hsa-miR-541 from MicroCosm Targets, data from GeneSetDB.
LIT_MM_ZHANG_PREDICTED-TARGETS_MATURE-B-CELL_DIFF	Differentially expressed transcription factors in mature B cells that are predicted targets of differentially expressed miRNAs (Table S4; Pubmed:19202128)
MIRNA_MM_WANG_MMU-MIR-125B-5P	WANG_MMU-MIR-125B-5P; Prediction of both conserved and nonconserved microRNA targets in animals 2008.
LIT_MM_KIM_KCL-6H_CORTICAL-NEURONS_UP	UP list of genes with expression changes that were significant following 6 hours KCl stimulation, based on RNA-Seq biological replicate 1 (Table S8; Pubmed:20393465)
MIRNA_MM_BETEL_MMU-MIR-146B_1	BETEL_MMU-MIR-146B_1; Good mirSVR score Conserved; The microRNA.org resource: targets and expression.
LIT_MM_PENA-LLOPIS_SCRAMBLED-SHRNA_MEF_TSC2_TSC2_RAPAMYCIN_UP	UP_scrambled-shRNA_List of probes with any statistically significant pattern and at least a 1.5 fold change for either scrambled or Tfeb shRNA expressing MEFs (Table S4; Pubmed:21804531)
LOC_MM_CHR7_B3	Genes in cytogenetic band chr7_B3
CTD_MM_MERCURY	Mercury from CTD (Comparative Toxicogenomics Database), data from GeneSetDB.
MPO_MM_THYMUS_HYPOPLASIA	thymus hypoplasia from MPO (Mammalian Phenotype Ontology), data from GeneSetDB.
LIT_MM_SIMMEN_JEJUNUM_KLF9-KNOCKOUT_DN	up-Jejunum genes up-regulated (1.3 fold cutoff) in Klf9 knockout mice (Table S2; Pubmed:17379758)
MIRNA_MM_WANG_MMU-MIR-184-5P	WANG_MMU-MIR-184-5P; Prediction of both conserved and nonconserved microRNA targets in animals 2008.
LIT_MM_MAJEWSKI_SUZ12PLT8MPL-PLUS_ADULT-LSK_DN	DN Adult LSK Suz12Plt8/+ Mpl+/+ vs wild-type log-ratios,Fetal and adult LSK log-ratios (Table S4; Pubmed:20445021)
MICROCOSM_TARGETS_MM_HSA-MIR-625	hsa-miR-625 from MicroCosm Targets, data from GeneSetDB.
SIDER_MM_MENTAL_DISORDER	Mental disorder from SIDER (SIDe Effect Resource), data from GeneSetDB.
CTD_MM_ROTENONE	Rotenone from CTD (Comparative Toxicogenomics Database), data from GeneSetDB.
TF_MM_FRIARD_MEIS1	Target genes of transcription factor MEIS1, predicted by CircuitsDB
LIT_MM_PONGUBALA_EBF_PAX5PRO-B-CELL_DIFF	Listing of EBF regulated genes in Pax5??pro-B cells (Table S2; Pubmed:18176567)
MIRNA_MM_WANG_MMU-MIR-101A-5P	WANG_MMU-MIR-101A-5P; Prediction of both conserved and nonconserved microRNA targets in animals 2008.
MIRNA_MM_BETEL_MMU-MIR-1946A	BETEL_MMU-MIR-1946A; Good mirSVR score Non-conserved; The microRNA.org resource: targets and expression.
MSIGDB_MM_BERENJENO_TRANSFORMED_BY_RHOA_DN	Genes down-regulated in NIH3T3 cells (fibroblasts) transformed by expression of contitutively active (Q63L) form of RHOA [GeneID=387] off plasmid vector.
LIT_MM_CARONE_OFFSPRING-LIVER_FATHER-LOW-PROTEIN-DIET_DN	DN_gene expression differences in the livers of the offspring from the two types of crosses (Table S1-Significant changes; Pubmed:21183072)
MIRNA_MM_WANG_MMU-MIR-466P-3P	WANG_MMU-MIR-466P-3P; Prediction of both conserved and nonconserved microRNA targets in animals 2008.
LIT_MM_HARIBHAI_ITREG_NTREG_UP	UP Differential gene expression between iTreg and freshly isolated nTreg cell preparations (n=5 and 4, respectively) (Table S3; Pubmed:19265124)
MIRNA_MM_WANG_MMU-MIR-686	WANG_MMU-MIR-686; Prediction of both conserved and nonconserved microRNA targets in animals 2008.
HPO_MM_APNEA	Apnea from HPO (Human Phenotype Ontology), data from GeneSetDB.
LIT_MM_IGUCHI_MRNA_TESTE_17D_DIFF	Probe sets enriched in mRNAs from testes of 17-day-old mice (Table S4; Pubmed:16682651)
MIRNA_MM_WANG_MMU-MIR-495-3P	WANG_MMU-MIR-495-3P; Prediction of both conserved and nonconserved microRNA targets in animals 2008.
MIRNA_MM_WANG_MMU-MIR-466C-3P	WANG_MMU-MIR-466C-3P; Prediction of both conserved and nonconserved microRNA targets in animals 2008.
MIRNA_MM_WANG_MMU-MIR-5120	WANG_MMU-MIR-5120; Prediction of both conserved and nonconserved microRNA targets in animals 2008.
LIT_MM_ZANDER_TOPOTECAN-RESISTANT_BRCA1-P53_TUMOR_UP	up-regulated in topotecan resistant Brca1-/-,p53-/- tumors by SAM (??=1.058, 2.21% median false positive). (Table S2; Pubmed:20145144)
LIT_MM_KELLERMAYER_METHYLATION_P30-P90_DN	List of genes with decreased expression from P30 to P90 in mouse colonic mucosa (Table S6; Pubmed:20197410)
MIRNA_MM_WANG_MMU-MIR-1958	WANG_MMU-MIR-1958; Prediction of both conserved and nonconserved microRNA targets in animals 2008.
LIT_MM_ABEL_TESTICULAR-TRANSCRIPT_FSH_72H_UP	Up at 72h_Effects of FSH treatment on testicular transcript levels (Table S2A-C; Pubmed:19136570)
LIT_MM_FAGMAN_LUNG_VS_WE_UP	Fold change([lung] vs [WE]) (Table S2; Pubmed:21924257)
LIT_MM_KOROSTYNSKI_SWR_J_MORPHINE_ACUTE_UP	SWR/J_ACUTE_UP_lists of probe sets of genes with expression altered by acute and chronic morphine (Additional file 2; Pubmed:17598886)
LOC_MM_CHR11_C	Genes in cytogenetic band chr11_C
GO_CC_MM_MITOCHONDRIAL_INNER_MEMBRANE	GO:0005743 ; GO Term Name: mitochondrial inner membrane ; GO domain: cellular_component ; GO Evidence Code: IDA
MIRNA_MM_BETEL_MMU-MIR-1964	BETEL_MMU-MIR-1964; Good mirSVR score Non-conserved; The microRNA.org resource: targets and expression.
LIT_MM_ESTEPIII_CR_HIGHCAL_DN	DN_All genes significantly changed in CR relative to HIGHCAL. (Table S2; Pubmed:19370158)
MIRNA_MM_WANG_MMU-MIR-450B-5P	WANG_MMU-MIR-450B-5P; Prediction of both conserved and nonconserved microRNA targets in animals 2008.
LIT_MM_LI_30H_2-3-PH_LIVER_DN	down-30h-Differentially expressed genes after 2/3 PH relative to normal liver (Table S3; Pubmed:19700759)
LIT_MM_AVIVI_SPECIES_OXYGEN_DIFF	species--significant differential expression in response to hypoxia, 380 changed across species, and 73 demonstrated an interactive effect of oxygen concentration by species--identifiable UniGene clusters for hypoxia, species, and interaction genes, respectively (Table S2; Pubmed:16788006)
WIKIPATHWAYS_MM_SENESCENCE_AND_AUTOPHAGY-WP615	Senescence and Autophagy(WP615) from WikiPathways, data from GeneSetDB.
LIT_MM_KHO_PTCH_DMB_NORMAL_TPC1-49.10_TPC2-13.68_LUNG_UP	tPC1 49.10% tPC2 13.68% Mouse Lung UP 359 genes regulated in human desmoplastic medulloblastoma (dMB), and their respective mouse cerebellar and lung development signal, temporal PCs, and regulation in Ptch+/- Mouse MBs sorted in descending order by log fold of dMB/normal.Calls are mapped (A,M,P) to (0.00, 0.01, 1.00) (Table S2; Pubmed:15075291)
MIRNA_MM_WANG_MMU-MIR-1943-5P	WANG_MMU-MIR-1943-5P; Prediction of both conserved and nonconserved microRNA targets in animals 2008.
LIT_MM_HUANG_HIPPOCAMUS-TRAN_EQTLS_DIFF	hippocamus-tran-Genes that lie within eQTL 95% confidence intervals containing five or fewer genes--expression quantitative trait loci (eQTLs) in rodents has been limited by the low mapping resolution inherent in crosses between inbred strains (Table S1; Pubmed:19376938)
MIRNA_MM_WANG_MMU-MIR-342-3P	WANG_MMU-MIR-342-3P; Prediction of both conserved and nonconserved microRNA targets in animals 2008.
MIRNA_MM_WANG_MMU-MIR-466B-3P	WANG_MMU-MIR-466B-3P; Prediction of both conserved and nonconserved microRNA targets in animals 2008.
LIT_MM_MCDUNN_CD4-SPLENOCYTE_6H_SURGERY-CLP-SHAM_ANNOTATED_DIFF	Differentially Expressed Probe Sets Identified in CD4 Splenocytes 6h After Surgery (CLP or Sham)nnotated (Table S1; Pubmed:16931309)
HPO_MM_APLASIA_HYPOPLASIA_OF_THE_CEREBRUM	Aplasia/Hypoplasia of the cerebrum from HPO (Human Phenotype Ontology), data from GeneSetDB.
LIT_MM_DEROO_TGF_D5E-MAMMARY-GLAND_DN	down-TGF?-responsive genes also present in the d5E mammary gland dataset. (Table S5; Pubmed:19484750)
MIRNA_MM_WANG_MMU-MIR-218-5P	WANG_MMU-MIR-218-5P; Prediction of both conserved and nonconserved microRNA targets in animals 2008.
LIT_MM_CASTELLANO_G0-ARRESTED-N-RAS_SERUM-STARVED-1H_DIFF	Differential gene expression in serum-starved, G0-arrested N-ras-/- fibroblasts after incubation of cell cultures in the presence of serum for 1 hour (Table S5; Pubmed:19895680)
MIRTARBASE_MM_HSA-MIR-1	hsa-miR-1 from miRTarBase, data from GeneSetDB.
MIRNA_MM_WANG_MMU-MIR-467C-3P	WANG_MMU-MIR-467C-3P; Prediction of both conserved and nonconserved microRNA targets in animals 2008.
LIT_MM_MITIKU_POSTIMPLANTATION-EMBRYOGENEIS_E7.75-E8.0A_DN	E7.75-E8.0a_Genes Decreasing more than 3-fold on each Interval (Table S3; Pubmed:18061570)
LIT_MM_MELETIS_P53_NEURAL-STEM-CELL_UP	upregulated in p53??neural stem cells (Table S1; Pubmed:16368933)
HPO_MM_ABNORMALITY_OF_THE_OCULAR_REGION	Abnormality of the ocular region from HPO (Human Phenotype Ontology), data from GeneSetDB.
LIT_MM_YU_GATA-1_DELAYED-REPRESSED_DIFF	delayed repressed GATA-1 bound and differentially expressed genes (Table S3; Pubmed:19941827)
LIT_MM_SAMAL_PC12-CELL_PACAP-DEPEND-TRANSCRIPT_UP	PC12 Transcripts (Table S3; Pubmed:17651866)
MIRNA_MM_WANG_MMU-MIR-467E-3P	WANG_MMU-MIR-467E-3P; Prediction of both conserved and nonconserved microRNA targets in animals 2008.
LIT_MM_NISHIYAMA_TF-NRIP1_ES-CELL_DN	Nrip1 Genes up-regulated or down-regulated >=2 fold in response to manipulation of transcription factors (Table S3; Pubmed:19796622)
MICROCOSM_TARGETS_MM_HSA-MIR-16-2	hsa-miR-16-2 from MicroCosm Targets, data from GeneSetDB.
STITCH_MM_NAD-CID000005892	NAD+(CID000005892) from STITCH (Search Tool for Interactions of Chemicals), data from GeneSetDB.
LIT_MM_SAJAN_EML-ANALYSIS_EARLY-MIDDLE_DIFF	Early and Middle_EML analysis (Table S5; Pubmed:17660535)
LIT_MM_WEBER_TCF1LINEAGE-TCF1THY1-CD25_TCF1LINEAGE-TCF1THY1-CD25_UP	UP_Two fold gene lists from Figure 1e (Table S2; Pubmed:21814277)
SIDER_MM_VERTIGO	Vertigo from SIDER (SIDe Effect Resource), data from GeneSetDB.
LIT_MM_SOKOLOVIC_FASTING_INTESTINE_12H_DN	12h DNs_Fold changes in response to fasting (Additional file 1; Pubmed:17925015)
LIT_MM_BARCLAY_FED-GHR_UP	Fed-WT/ghr-/-_UP_transcript analyses of STAT5-impaired ghr-391 and ghr-/- mice were undertaken in both the fed and fasted state (Table S2B; Pubmed:21084450)
MIRNA_MM_WANG_MMU-MIR-143-5P	WANG_MMU-MIR-143-5P; Prediction of both conserved and nonconserved microRNA targets in animals 2008.
LIT_MM_SZPARA_NEURITE-OUTGROWTH_DRG_SCG_VITRO_DIFF	genes changed in both DRG and SCG during neurite outgrowth in vitro (Additional file2-Abbreviation; Pubmed:18036227)
LIT_MM_MILLER_6D-GFP-CELL_D0-D4-D6-GFP-CELL_FDR0.05_DN	FDR0.05_DN_Results of array comparison (Table S1; Pubmed:18478100)
LIT_MM_APRIL_UVB-RESPONSIVE_BASAL-EPIDERMIS-P2.5_DN	down-UVB-Responsive Genes in the +/+ Basal Epidermis of P2.5 Mice (Table S1; Pubmed:17222061)
LIT_MM_MOREY_LIVER_PACIFIC-CIGUATOXIN-1_1H-4H-24H_TREND_C3_DIFF	cluster3_Genes included in the trend set (Table S2; Pubmed:18353800)
MIRNA_MM_BETEL_MMU-MIR-681	BETEL_MMU-MIR-681; Good mirSVR score Non-conserved; The microRNA.org resource: targets and expression.
LIT_MM_STEGER_GENE-CLOSEST-TO-TRANSIENTLY-ACETYLATED-REGIONS-WITHIN-50-KB-TSS_DIFF	Genes Closest to the Transiently Acetylated Regions and within 50 kb of the Transcription Start Site (TSS) (Table S3; Pubmed:20478996)
MIRNA_MM_WANG_MMU-MIR-706	WANG_MMU-MIR-706; Prediction of both conserved and nonconserved microRNA targets in animals 2008.
LIT_MM_HIRATANI_K-MEANS-CLUSTERS-OF-REPLICATION-TIMING_CLUSTER-3_DIFF	cluster-3 Lists of RefSeq genes that reside within K means clusters of replication timing 1-20 as defined in Figures 6-7 and their mRNA expression data (Table S3; Pubmed:19952138)
GO_BP_MM_GTP_CATABOLIC_PROCESS	GO:0006184 ; GO Term Name: GTP catabolic process ; GO domain: biological_process ; GO Evidence Code: ISS
MIRNA_MM_WANG_MMU-MIR-30E-3P	WANG_MMU-MIR-30E-3P; Prediction of both conserved and nonconserved microRNA targets in animals 2008.
LIT_MM_RALSTON_ESCELL_GATA3_TROPHOBLAST_UP	Gata3_Trophoblast genes induced by Gata3 and Cdx2 (Table S2; Pubmed:20081188)
LIT_MM_BATTLE_HNF4ALPHA-NULL-EMBRYONIC_LIVER_DN	GENES DOWNREGULATED ?2.5 FOLD (p ?0.05) in HNF4? NULL EMBRYONIC LIVERS (Table S1; Pubmed:16714383)
MIRNA_MM_WANG_MMU-MIR-1981-5P	WANG_MMU-MIR-1981-5P; Prediction of both conserved and nonconserved microRNA targets in animals 2008.
LIT_MM_SHETH_PAM4_TUMOR_LIVER_TXNIP-DEFICIENT_DIFF	PAM4-We used Affymetrix expression array chips (Mouse Genome 430A 2.0. array) to compare the transcript profiles of tumor and normal liver tissues of Txnipdeficient mice (Table S4; Pubmed:16607285)
LIT_MM_THOMAS_14M-DE5_NO-R6_2_STRIATUM_DN	DN_Genes selectively altered in their expression in DE5 trangenic mice, but not in R6/2 mice (Table S2; Pubmed:21177255)
MIRNA_MM_WANG_MMU-MIR-344D-3P	WANG_MMU-MIR-344D-3P; Prediction of both conserved and nonconserved microRNA targets in animals 2008.
MIRNA_MM_WANG_MMU-MIR-1904	WANG_MMU-MIR-1904; Prediction of both conserved and nonconserved microRNA targets in animals 2008.
CTD_MM_MITOXANTRONE	Mitoxantrone from CTD (Comparative Toxicogenomics Database), data from GeneSetDB.
MIRNA_MM_GRIMSON_MIR-136	GRIMSON_MIR-136; Predicted_Targets_Info; MicroRNA Targeting Specificity in Mammals: Determinants beyond Seed Pairing.
LIT_MM_HU_ESCELL_61-DIFF-TISSUE_CANDIDATE-SELF-RENEWAL_DIFF	Relative expression level of candidate self-renewal genes in 61 different tissues (Table S2; Pubmed:19339689)
GO_BP_MM_PROTEIN_UBIQUITINATION	GO:0016567 ; GO Term Name: protein ubiquitination ; GO domain: biological_process ; GO Evidence Code: IEA
LIT_MM_OLIVER_13H_UP	experimentTable-tsv-E-MEXP-3493--time-13 hours-CONDITION_UP-200 (Gene Expression Atlas - E-MEXP-3494; Pubmed:22264613)
LIT_MM_PINENT_ATGL_SM_UP	up-ATGL-SM (Table S1; Pubmed:18572100)
LIT_MM_ZHU_UNIQUE-PATTERN_ANTI-IG_DIFF	Expression fold-changes and GO designations of features of known genes showing unique expression patterns in response to Anti-Ig (Table S7; Pubmed:15585835)
NETPATH_MM_ANDROGEN_RECEPTOR_SIGNALING_PATHWAY	Androgen Receptor Signaling Pathway from NetPath, data from GeneSetDB.
MIRNA_MM_WANG_MMU-MIR-199A-5P	WANG_MMU-MIR-199A-5P; Prediction of both conserved and nonconserved microRNA targets in animals 2008.
LIT_MM_JIANG_ESCELL_TRIPLE-RNAI_6D_DN	DN_6d_List of differentially expressed genes after Klf2, Klf4 and Klf5 depletion (Table S3; Pubmed:18264089)
LOC_MM_CHR5_G2	Genes in cytogenetic band chr5_G2
LIT_MM_LACAZE_SOD2_IFN-RISCFREE_IFN_RNAI_DN	DN SOD2_IFN- vs. Riscfree_IFN-,RNAi gene expression clusters (Addi. file 8; Pubmed:19664281)
LIT_MM_LAFFAIRE_TS1CJE_EUPLOID_CEREBELLUM_P3_DN	p3_DN_differentially expressed genes between Ts1Cje and euploid samples (Additional file 2; Pubmed:19331679)
LIT_MM_MILENKOVIC_CURCUMIN_UP	up-Curcumin --- List of differentially expressed mRNAs (Table S5; Pubmed:22253797)
STITCH_MM_AMMONIA-CID000000222	ammonia(CID000000222) from STITCH (Search Tool for Interactions of Chemicals), data from GeneSetDB.
MIRNA_MM_WANG_MMU-MIR-450A-2-3P	WANG_MMU-MIR-450A-2-3P; Prediction of both conserved and nonconserved microRNA targets in animals 2008.
MIRNA_MM_WANG_MMU-MIR-467D-3P	WANG_MMU-MIR-467D-3P; Prediction of both conserved and nonconserved microRNA targets in animals 2008.
LIT_MM_KHO_PTCH_CMB_NORMAL_TPC1-53.72_TPC2-16.30_CEREB_DN	tPC1 53.72% tPC2 16.30% Mouse Cereb DN 263 genes regulated in human classic medulloblastoma (cMB), and their respective mouse cerebellar and lung development signal, temporal PCs, and regulation in Ptch+/- Mouse MBs sorted in descending order by log fold of cMB/normal.Calls are mapped (A,M,P) to (0.00, 0.01, 1.00) (Table S3; Pubmed:15075291)
MIRNA_MM_GRIMSON_MIR-185_882_3473_4306_4644	GRIMSON_MIR-185_882_3473_4306_4644; Predicted_Targets_Info; MicroRNA Targeting Specificity in Mammals: Determinants beyond Seed Pairing.
MIRNA_MM_BETEL_MMU-MIR-369-5P	BETEL_MMU-MIR-369-5P; Good mirSVR score Non-conserved; The microRNA.org resource: targets and expression.
MIRNA_MM_WANG_MMU-MIR-148B-5P	WANG_MMU-MIR-148B-5P; Prediction of both conserved and nonconserved microRNA targets in animals 2008.
LIT_MM_HUNDAHL_24H_HYPOXIA_UP	UP-Differential expression of transcripts after 24 hours of hypoxia in wt mice (Table S4; Pubmed:22164238)
STITCH_MM_NAD-CID100000925	NAD+(CID100000925) from STITCH (Search Tool for Interactions of Chemicals), data from GeneSetDB.
HPO_MM_MICROCEPHALY	Microcephaly from HPO (Human Phenotype Ontology), data from GeneSetDB.
MIRNA_MM_WANG_MMU-MIR-183-5P	WANG_MMU-MIR-183-5P; Prediction of both conserved and nonconserved microRNA targets in animals 2008.
MIRNA_MM_WANG_MMU-MIR-677-3P	WANG_MMU-MIR-677-3P; Prediction of both conserved and nonconserved microRNA targets in animals 2008.
MIRNA_MM_WANG_MMU-MIR-217-3P	WANG_MMU-MIR-217-3P; Prediction of both conserved and nonconserved microRNA targets in animals 2008.
LIT_MM_REN_DEHP_PPARA-NULL_DIFF	genes were differentially expressed in PPARa-null mice after DEHP exposure (Suppl. file 4; Pubmed:19850644)
LIT_MM_KITAMURA_J774.1-CELL_LPS-STIMULATION_TRANSLATIONALLY_DN	Transcripts translationally down-regulated in J774.1 cells by LPS stimulation (Table S10; Pubmed:18230670)
LIT_MM_LEE_CHROMOSOMAL-LOCI_GLI1_GNPS_DIFF	High-confidence chromosomal loci bound by Gli1 in GNPs (Table S1A; Pubmed:20460306)
LIT_MM_MONNIER_SCCVII-TUMOR_NONIRRADIATED_IRRADIATED_DN	DN_Gene expression profiling of selected tumor cells. (Table S1; Pubmed:18794119)
MIRNA_MM_GRIMSON_MIR-485-5P_1698_1703_1962	GRIMSON_MIR-485-5P_1698_1703_1962; Predicted_Targets_Info; MicroRNA Targeting Specificity in Mammals: Determinants beyond Seed Pairing.
MIRNA_MM_WANG_MMU-MIR-181B-5P	WANG_MMU-MIR-181B-5P; Prediction of both conserved and nonconserved microRNA targets in animals 2008.
MIRNA_MM_WANG_MMU-MIR-1192	WANG_MMU-MIR-1192; Prediction of both conserved and nonconserved microRNA targets in animals 2008.
LIT_MM_STARK_DF16A_PFC_DN	PFC_DN_List of differentially expressed probe set in the prefrontal cortex(PFC) and hippocampus(HPC) of Df(16)A?/? mice (Table S1; Pubmed:18469815)
MIRNA_MM_BETEL_MMU-MIR-344	BETEL_MMU-MIR-344; Good mirSVR score Non-conserved; The microRNA.org resource: targets and expression.
MIRNA_MM_WANG_MMU-MIR-5119	WANG_MMU-MIR-5119; Prediction of both conserved and nonconserved microRNA targets in animals 2008.
LIT_MM_LIAO_STAT5-PARTIAL-KO_DIFF	relative expression for each gene in cells from Stat5fl/fl mice transduced with a retrovirus expressing Cre recombinase, as compared to cells transduced with the empty pRV retrovirus. (Table S1; Pubmed:18820682)
MIRNA_MM_WANG_MMU-MIR-15A-3P	WANG_MMU-MIR-15A-3P; Prediction of both conserved and nonconserved microRNA targets in animals 2008.
LIT_MM_DENOLET_SCARKO_DN	down-Differentially expressed transcripts-SCARKO/Control (Table S1; Pubmed:16166195)
LIT_MM_LI_HT-E_HT-L_UP	UP Analysis of significantly altered genes in the HT-E compared with HT-L model (Table S1; Pubmed:19700752)
LIT_MM_SCHRAML_72H_BATF-T-CELL_TH17_UP	Microarray analysis of anti-CD3/CD28-activated T cells at 72h, presented as heat maps of genes 5-foldinduced in Batf+/+ T cells under TH17 conditions. (Table S2; Pubmed:19578362)
MIRNA_MM_WANG_MMU-MIR-511-5P	WANG_MMU-MIR-511-5P; Prediction of both conserved and nonconserved microRNA targets in animals 2008.
MIRNA_MM_KREK_MMU-MIR-671-3P	KREK_MMU-MIR-671-3P; Center for Comparative Functional Genomics; Department of Biology, New York University.
LIT_MM_LUCI_SPLEEN_GUT_SKIN_NKP46-CD3-CELL_C8_DIFF	cluster8_List of genes included in clusters 1, 2, 7 and 8 (Table S1; Pubmed:19029904)
MICROCOSM_TARGETS_MM_HSA-MIR-551B	hsa-miR-551b from MicroCosm Targets, data from GeneSetDB.
LIT_MM_EVEILLARD_TESTIS_LEYDIG_DEHP_DN	DN_Main effects of DEHP on Leydig cells transcriptome. (File S2; Pubmed:19245819)
MSIGDB_MM_KARLSSON_TGFB1_TARGETS_UP	Genes up-regulated by TGFB1 [GeneID=7040] in MEF cells (embryonic fibroblast) via TGFB1R [GeneID=7046].
LIT_MM_DRISKELL_GFP-PLUS-CD133_GFP-CD133_MINUS_VS_GFP-CD133-MINUS_UP	UP Genes differentially expressed in GFP+ CD133+ and GFP? CD133+ dermal cells compared with GFP? CD133? dermal cells (Table S1; Pubmed:19605494)
MIRNA_MM_WANG_MMU-MIR-294-3P	WANG_MMU-MIR-294-3P; Prediction of both conserved and nonconserved microRNA targets in animals 2008.
MIRNA_MM_BETEL_MMU-LET-7I_1	BETEL_MMU-LET-7I_1; Good mirSVR score Conserved; The microRNA.org resource: targets and expression.
MIRNA_MM_WANG_MMU-MIR-669K-3P	WANG_MMU-MIR-669K-3P; Prediction of both conserved and nonconserved microRNA targets in animals 2008.
MIRNA_MM_WANG_MMU-MIR-30A-3P	WANG_MMU-MIR-30A-3P; Prediction of both conserved and nonconserved microRNA targets in animals 2008.
MIRNA_MM_WANG_MMU-MIR-669H-3P	WANG_MMU-MIR-669H-3P; Prediction of both conserved and nonconserved microRNA targets in animals 2008.
MIRNA_MM_BETEL_MMU-MIR-219	BETEL_MMU-MIR-219; Good mirSVR score Non-conserved; The microRNA.org resource: targets and expression.
HPO_MM_ABNORMALITY_OF_THE_LYMPHATIC_SYSTEM	Abnormality of the lymphatic system from HPO (Human Phenotype Ontology), data from GeneSetDB.
LIT_MM_KAMILERI_P15_CSB-XPA_LIVER_UP	up-Significant gene expression in P15 Csb-m/m-Xpa-/- livers. (Table S1; Pubmed:22323595)
MICROCOSM_TARGETS_MM_HSA-MIR-96	hsa-miR-96 from MicroCosm Targets, data from GeneSetDB.
LIT_MM_LI_20H_2-3-PH_LIVER_DN	down-20h-Differentially expressed genes after 2/3 PH relative to normal liver (Table S3; Pubmed:19700759)
LIT_MM_SMEETS_PPARALPHA_SHAM_UP	UP_List of 509 probeset only present in PPAR?-/- sham versus wild-type sham (Table SIV; Pubmed:18812456)
LIT_MM_ESTEPIII_CR_VS_HIGHCAL_DN	DN_All genes significantly changed in CR relative to HIGHCAL. (Table S2; Pubmed:19370158)
LIT_MM_ACEVEDO_IFGFR1-MEDIATEDPCA_24WEEK_UP	up-Gene Expression Profile for iFGFR1-Mediated PCa. -24week (Table S3; Pubmed:18068632)
LIT_MM_CHONG_VILLI_RBKO-VILLI_INTESTINAL0-EPITHELIA_DN	RbKO-villi_intestinal0-epithelia_ (Table S2 ; Pubmed:20016602)
MIRNA_MM_WANG_MMU-MIR-185-3P	WANG_MMU-MIR-185-3P; Prediction of both conserved and nonconserved microRNA targets in animals 2008.
MIRNA_MM_BETEL_MMU-MIR-467B	BETEL_MMU-MIR-467B; Good mirSVR score Non-conserved; The microRNA.org resource: targets and expression.
LIT_MM_LACAZE_NFKB2_IFN_VS_RISCFREE_IFN_RNAI_UP	UP Nfkb2_IFN+ vs. Riscfree_IFN+,RNAi gene expression clusters (Addi. file 8; Pubmed:19664281)
MIRNA_MM_WANG_MMU-MIR-466I-3P	WANG_MMU-MIR-466I-3P; Prediction of both conserved and nonconserved microRNA targets in animals 2008.
LIT_MM_MOULOS_MOIL_48H_DMSO_UP	UP Moil_48h/DMSO List of 925 differentially expressed genes in response to mastic oil. The list of 925 differentially expressed genes and their cluster memberships as derived after statistical and clustering analysis as described in Methods. Several annotation elements such as GenBank accession numbers and RefSeq IDs are included together with fold change ratios for each differentially expressed …
MIRNA_MM_BETEL_MMU-MIR-879	BETEL_MMU-MIR-879; Good mirSVR score Non-conserved; The microRNA.org resource: targets and expression.
MIRNA_MM_BETEL_MMU-MIR-689	BETEL_MMU-MIR-689; Good mirSVR score Non-conserved; The microRNA.org resource: targets and expression.
LIT_MM_HUANG_UBE2F_UBE2M_DN	Differential expression in any comparison; Ube2f versus Ube2m (Table S5; Pubmed:19250909)
LIT_MM_LACAZE_CASP4_IFN-RISCFREE_IFN_RNAI_DN	DN Casp4_IFN- vs. Riscfree_IFN-,RNAi gene expression clusters (Addi. file 8; Pubmed:19664281)
LIT_MM_HARTL_MS_2-DE-GELS_PROTEIN-IDENTIFICATION_DIFF	Protein expression and identification data. (Table S6; Pubmed:18283662)
MIRNA_MM_WANG_MMU-MIR-532-5P	WANG_MMU-MIR-532-5P; Prediction of both conserved and nonconserved microRNA targets in animals 2008.
NETPATH_MM_EGFR1_SIGNALING_PATHWAY	EGFR1 Signaling Pathway from NetPath, data from GeneSetDB.
MIRNA_MM_WANG_MMU-MIR-297A-5P	WANG_MMU-MIR-297A-5P; Prediction of both conserved and nonconserved microRNA targets in animals 2008.
LIT_MM_DURANT_STAT3_CD4-T-CELL_DIFF	STAT3 Directly Regulates Genes Involved in CD4+ T Cell Survival and Proliferation (Table S1; Pubmed:20493732)
MICROCOSM_TARGETS_MM_HSA-MIR-593	hsa-miR-593 from MicroCosm Targets, data from GeneSetDB.
LIT_MM_SWIFT_BETA1ARG389-BETA1GLY389-AC5_NTG_HEART_DIFF	Genes changes common to Arg, Gly and AC5 vs NTG (Table S2; Pubmed:18664629)
MIRNA_MM_WANG_MMU-MIR-467E-5P	WANG_MMU-MIR-467E-5P; Prediction of both conserved and nonconserved microRNA targets in animals 2008.
LIT_MM_GOLDRATH_HOMEOSTATIC-PROLIFERATION-OT-I-CD8-T-CELL_UP	Genes induced during homeostatic proliferation of OT-I CD8+ T cells (Table S5; Pubmed:15548615)
LIT_MM_SAJAN_IE_MIDDLE-ANALYSIS_DIFF	M_Patterns within IE samples (Table S4; Pubmed:17660535)
STITCH_MM_CISPLATIN-CID100002767	cisplatin(CID100002767) from STITCH (Search Tool for Interactions of Chemicals), data from GeneSetDB.
LIT_MM_TOMCZAK_MYOGENIC_2D_C4_DIFF	List of Affymetrix probe sets classified into Group IV clusters. All fold change values are relative to day -2 (Table S4; Pubmed:14688207)
MIRNA_MM_BETEL_MMU-MIR-804	BETEL_MMU-MIR-804; Good mirSVR score Non-conserved; The microRNA.org resource: targets and expression.
LIT_MM_NIAKAN_CHIP-CHIP_SOX17-INDUCIBL_MES-CELL_FLAG-ANTIBODY_UP	Sox17-enriched genomic regions and the associated genes in Sox17-inducible murine embryonic stem cells treated with doxycycline for 48hrs. These mES cells were chromatin immunoprecipitated with Sox17 antibody followed by genome-wide promoter tiling arrays (Table S5; Pubmed:20123909)
LIT_MM_LEFEVRE_3-FOLD_OOGONIA_VSPROSPERMATOGONIA_FEMALE-MALE-SOMATIC_CHIP-A_DIFF	Genes with 3 fold higher intensity in oogonia, versus prospermatogonia, and female and male somatic cells combined-chip A (LIST_3; Pubmed:18330932)
MIRNA_MM_WANG_MMU-MIR-3470A	WANG_MMU-MIR-3470A; Prediction of both conserved and nonconserved microRNA targets in animals 2008.
LIT_MM_CHALLEN_LOWER-SPKLS-MY-HSC_UPPER-SPKLS-LY-HSC_UP	Lower-SPKLS Genes - Genes expressed >2-fold higher in lower-SPKLS HSCs compared to upper-SPKLS HSCs (Table S3; Pubmed:20207229)
LIT_MM_CHONG_CRYPTS-VILLI_INTESTINES_UP	UP 1207 genes were upregulated and 2363 genes were downregulated as progenitor cells in the crypt migrated up into the villus and exited the cell cycle (Table S1 ; Pubmed:20016602)
LIT_MM_XU_STAT3_UP	UP_Genes Differentially Expressed in Stat3?/?Mice (Additional file 1; Pubmed:18070348)
MIRNA_MM_WANG_MMU-MIR-30C-2-3P	WANG_MMU-MIR-30C-2-3P; Prediction of both conserved and nonconserved microRNA targets in animals 2008.
INOH_MM_JAK_STAT_PATHWAY_AND_REGULATION	JAK STAT pathway and regulation from INOH (Integrating Network Objects with Hierarchies), data from GeneSetDB.
LIT_MM_GAVIN_TN-CELL_CD25-FOXP3-CD4-T_TFN_TR-CELL_DIFF	Gene expression in selected clusters (Figure S5; Pubmed:17220874)
MIRNA_MM_WANG_MMU-MIR-873-3P	WANG_MMU-MIR-873-3P; Prediction of both conserved and nonconserved microRNA targets in animals 2008.
MIRNA_MM_WANG_MMU-MIR-183-3P	WANG_MMU-MIR-183-3P; Prediction of both conserved and nonconserved microRNA targets in animals 2008.
LIT_MM_MERCER_OLIGODENDROCYTE-PROGENITOR_UP	up-Expression of mRNAs according to microarray analysis at different stages of oligodendrocyte and neuronal differentiation-- oligodendrocyte progenitors, OLP (Table S1; Pubmed:20137068)
HPO_MM_SPASTICITY	Spasticity from HPO (Human Phenotype Ontology), data from GeneSetDB.
MIRNA_MM_WANG_MMU-MIR-216A-5P	WANG_MMU-MIR-216A-5P; Prediction of both conserved and nonconserved microRNA targets in animals 2008.
LIT_MM_AYOUB_E14.5_BRAIN_VZ_DIFF	VZ_Summary of GO functional analysis by biological and disease processes (Table S3; Pubmed:21873192)
LIT_MM_FEI_NOGGIN_GROUP-I_UP	noggin downregulated-Group I Differentially expressed genes in response to BMP4 or noggin (shown in four tabs) (Table S6; Pubmed:19926752)
LIT_MM_VENEZIA_FETAL-LIVER_HEMATOPOIETIC-STEM-CELL_UP	Up-regulated in FL-HSC (Table S1; Pubmed:15459755)
LIT_MM_YANG_LIVER_FEMALE_GYK-HETEROZYGOUS-KO_DIFF	Liver gene expression signature of Gyk female heterozygous ko at p<0.05 (Table S12; Pubmed:19270708)
MIRNA_MM_WANG_MMU-MIR-29A-5P	WANG_MMU-MIR-29A-5P; Prediction of both conserved and nonconserved microRNA targets in animals 2008.
LIT_MM_LEE_RD-DEG_DIFF	List of 188 genes for RD-DEGs (Table SG; Pubmed:16627687)
LOC_MM_CHR15_D3	Genes in cytogenetic band chr15_D3
MIRNA_MM_BETEL_MMU-MIR-2134	BETEL_MMU-MIR-2134; Good mirSVR score Non-conserved; The microRNA.org resource: targets and expression.
MIRNA_MM_WANG_MMU-MIR-216B-5P	WANG_MMU-MIR-216B-5P; Prediction of both conserved and nonconserved microRNA targets in animals 2008.
LIT_MM_MERCER_POST-MITOTIC-OLIGODENDROCYTE_UP	up-Expression of mRNAs according to microarray analysis at different stages of oligodendrocyte and neuronal differentiation-- post-mitotic oligodendrocytes, PMO; (Table S1; Pubmed:20137068)
LIT_MM_LI_20H_1-3-PH_LIVER_UP	up-20h-Differentially expressed genes after 1/3 PH relative to normal liver (Table S2; Pubmed:19700759)
LIT_MM_LOPEZ_BRM2_DN	down-BRM2 vs Control (Table S1; Pubmed:19749746)
TF_MM_FRIARD_NF-Y	Target genes of transcription factor NF-Y, predicted by CircuitsDB
MIRNA_MM_WANG_MMU-MIR-297C-5P	WANG_MMU-MIR-297C-5P; Prediction of both conserved and nonconserved microRNA targets in animals 2008.
MIRNA_MM_WANG_MMU-MIR-190B-3P	WANG_MMU-MIR-190B-3P; Prediction of both conserved and nonconserved microRNA targets in animals 2008.
LIT_MM_DONZE_PKR_UP	up-List of genes regulated by PKR (Table SA; Pubmed:14749731)
LIT_MM_AMADOR-NOGUEZ_AGE-EFFECT_LITTLE_MICE_DIFF	Age-genotype interactions of genes with a significant age effect in Little mice or wild type mice (Table S8; Pubmed:15569359)
MPO_MM_DECREASED_TOTAL_BODY_FAT_AMOUNT	decreased total body fat amount from MPO (Mammalian Phenotype Ontology), data from GeneSetDB.
LIT_MM_IMAI_AKR-ISLET_BL6-ISLET_DN	Representative genes down-regulated in AKR islet vs Bl6 islet (Table SIb; Pubmed:18854371)
LIT_MM_LI_30H_2-3-PH_LIVER_UP	up-30h-Differentially expressed genes after 2/3 PH relative to normal liver (Table S3; Pubmed:19700759)
MIRNA_MM_WANG_MMU-MIR-351-5P	WANG_MMU-MIR-351-5P; Prediction of both conserved and nonconserved microRNA targets in animals 2008.
MIRNA_MM_BETEL_MMU-MIR-1982.1	BETEL_MMU-MIR-1982.1; Good mirSVR score Non-conserved; The microRNA.org resource: targets and expression.
MIRNA_MM_WANG_MMU-MIR-7B-3P	WANG_MMU-MIR-7B-3P; Prediction of both conserved and nonconserved microRNA targets in animals 2008.
MIRNA_MM_WANG_MMU-MIR-130A-5P	WANG_MMU-MIR-130A-5P; Prediction of both conserved and nonconserved microRNA targets in animals 2008.
STITCH_MM_CISPLATIN-CID000002770	cisplatin(CID000002770) from STITCH (Search Tool for Interactions of Chemicals), data from GeneSetDB.
MIRNA_MM_WANG_MMU-MIR-345-3P	WANG_MMU-MIR-345-3P; Prediction of both conserved and nonconserved microRNA targets in animals 2008.
MIRNA_MM_WANG_MMU-MIR-421-5P	WANG_MMU-MIR-421-5P; Prediction of both conserved and nonconserved microRNA targets in animals 2008.
MIRNA_MM_WANG_MMU-MIR-694	WANG_MMU-MIR-694; Prediction of both conserved and nonconserved microRNA targets in animals 2008.
MIRNA_MM_BETEL_MMU-MIR-1967	BETEL_MMU-MIR-1967; Good mirSVR score Non-conserved; The microRNA.org resource: targets and expression.
LIT_MM_LEE_PUTATIVE-GLI1-TARGET-GENE_GNPS_DIFF	Putative Gli1 target genes in GNPs (Table S5A; Pubmed:20460306)
GO_BP_MM_NEGATIVE_REGULATION_OF_TRANSCRIPTION_DNA-DEPENDENT	GO:0045892 ; GO Term Name: negative regulation of transcription_ DNA-dependent ; GO domain: biological_process ; GO Evidence Code: ISS
LIT_MM_TRIMARCHI_EBF3_PVALUE-LT0.001_DIFF	Affymetrix signal data and Fisher exact test p values are shown for all the genes that clustered with Ebf3 with a p value <0.001 (Supp Table T5; Pubmed:17444492)
SIDER_MM_NEUROPATHY_PERIPHERAL	Neuropathy peripheral from SIDER (SIDe Effect Resource), data from GeneSetDB.
LIT_MM_GLAUSER_GLUCOSE-CAMP_IEGS_PANCREATIC_METABOLIC_UP	up-Glucose and cAMP responsive IEGs were identified as described in Methods. Criterion refers to the criterion of assignmement as IEG. Criterion 1 means that the gene was classified according to the main criterion; Criterion 2 means that the gene was classified according to secondary criteria, as described in the Methods section.--pancreatic beta cells to metabolic stimulation (Table S1a; Pubmed:…
LIT_MM_TURCHINOVICH_FOLLICULAR-B_MZ-B_KLF3-TRANSGENIC_NORMAL_DIFF	Gene array data comparing follicular and MZ B cells from normal and KLF3 transgenic mice (Table S1; Pubmed:21297003)
LIT_MM_LAFFAIRE_TS1CJE_EUPLOID_CEREBELLUM_P0_DN	p0_DN_differentially expressed genes between Ts1Cje and euploid samples (Additional file 2; Pubmed:19331679)
SIDER_MM_FUNGAL_INFECTION	Fungal infection from SIDER (SIDe Effect Resource), data from GeneSetDB.
MIRNA_MM_WANG_MMU-MIR-181D-5P	WANG_MMU-MIR-181D-5P; Prediction of both conserved and nonconserved microRNA targets in animals 2008.
MIRNA_MM_BETEL_MMU-MIR-764-5P	BETEL_MMU-MIR-764-5P; Good mirSVR score Non-conserved; The microRNA.org resource: targets and expression.
MSIGDB_MM_MARSON_BOUND_BY_FOXP3_UNSTIMULATED	Genes with promoters bound by FOXP3 [GeneID=50943] in unstimulated hybridoma cells.
LOC_MM_CHR11_E2	Genes in cytogenetic band chr11_E2
LIT_MM_MOULOS_MOIL_24H_DMSO_UP	UP Moil_24h/DMSO List of 925 differentially expressed genes in response to mastic oil. The list of 925 differentially expressed genes and their cluster memberships as derived after statistical and clustering analysis as described in Methods. Several annotation elements such as GenBank accession numbers and RefSeq IDs are included together with fold change ratios for each differentially expressed …
MIRNA_MM_BETEL_MMU-MIR-2182	BETEL_MMU-MIR-2182; Good mirSVR score Non-conserved; The microRNA.org resource: targets and expression.
LIT_MM_SAJAN_IE_NIE_UP	UP_IE-Up and IE-Down (Table S4; Pubmed:17660535)
MIRNA_MM_BETEL_MMU-MIR-293	BETEL_MMU-MIR-293; Good mirSVR score Non-conserved; The microRNA.org resource: targets and expression.
HPO_MM_REDUCED_CONSCIOUSNESS_CONFUSION	Reduced consciousness/confusion from HPO (Human Phenotype Ontology), data from GeneSetDB.
MSIGDB_MM_YAO_TEMPORAL_RESPONSE_TO_PROGESTERONE_CLUSTER_13	Genes co-regulated in uterus during a time course response to progesterone [PubChem=5994]: SOM cluster 13.
MIRNA_MM_WANG_MMU-MIR-3090-5P	WANG_MMU-MIR-3090-5P; Prediction of both conserved and nonconserved microRNA targets in animals 2008.
LIT_MM_BOON_LMD-SAGE-LIBRARY_LOW_HIGH-METHYLATION-DIET_SAGE-TRANSCRIPT_DIFF	the transcript tags significantly over expressed in the LMD SAGE library. (Additional file 4; Pubmed:19077247)
LIT_MM_LACAZE_IRF3_IFN_VS_RISCFREE_IFN_RNAI_UP	UP Irf3_IFN+ vs. Riscfree_IFN+,RNAi gene expression clusters (Addi. file 8; Pubmed:19664281)
MIRNA_MM_WANG_MMU-MIR-3071-3P	WANG_MMU-MIR-3071-3P; Prediction of both conserved and nonconserved microRNA targets in animals 2008.
LIT_MM_MACLENNAN_LIVER_GYK-KO_DOL1_DN	Genes in the dol1(Day of life 1) black network module with Module Membership of 0.8 or higher. (Table S1A; Pubmed:19546021)
LIT_MM_BUGGE_PPARGAMMA2_DIFF	genes found to be induced by PPAR?2 expression Transcriptome analysis after short-term exposure to HA-PPAR? adenoviral vectors (Table S1; Pubmed:19282365)
LIT_MM_MACKIEWICZ_C9_CEREBRAL-CORTEX_SLEEP_WAKE_DN	down-sleep-wake-down-c7-diffrentially expressed between sleep and wakefulness in the cerebral cortex - FDR <1%; linear trend analysis for temporal pattern in gene expression - FDR <5% (Table S1; Pubmed:17698924)
LIT_MM_CORSINI_CD95_NEURAL-STEM-CELL_UP	UP Total gene list (Table S3; Pubmed:19664992)
LIT_MM_MOULOS_MOIL_6H_DMSO_DN	DN Moil_6h/DMSO List of 925 differentially expressed genes in response to mastic oil. The list of 925 differentially expressed genes and their cluster memberships as derived after statistical and clustering analysis as described in Methods. Several annotation elements such as GenBank accession numbers and RefSeq IDs are included together with fold change ratios for each differentially expressed g…
LIT_MM_WAUTHIER_SEX-INDEPENDENT_GO_LIVER_DIFF	Sex-independent genes classified as DNA-binding factors or transcriptional regulators by Gene Ontology (GO). (Table S9; Pubmed:20150183)
CTD_MM_ZOLEDRONIC_ACID	zoledronic acid from CTD (Comparative Toxicogenomics Database), data from GeneSetDB.
MIRNA_MM_WANG_MMU-MIR-3082-3P	WANG_MMU-MIR-3082-3P; Prediction of both conserved and nonconserved microRNA targets in animals 2008.
HPO_MM_ABNORMALITY_OF_THE_LIVER	Abnormality of the liver from HPO (Human Phenotype Ontology), data from GeneSetDB.
MIRNA_MM_WANG_MMU-MIR-302B-5P	WANG_MMU-MIR-302B-5P; Prediction of both conserved and nonconserved microRNA targets in animals 2008.
MIRNA_MM_BETEL_MMU-MIR-434-5P	BETEL_MMU-MIR-434-5P; Good mirSVR score Non-conserved; The microRNA.org resource: targets and expression.
LIT_MM_YANG_LIVER_MALE_LACTB-TRANSGENIC_DIFF	Liver gene expression signature of Lactb male tg at p<0.05 (Table S8; Pubmed:19270708)
LIT_MM_YU_IL-2-DEPENDENT_C57BL_6_2RBTHYMUS_CD4-ANTI-CD3-T-EFFECTOR-CEL_UP	UP CD4 anti-CD3 T effector cell IL-2-dependent genes (2-fold) (Table S2; Pubmed:19185518)
LIT_MM_PAN_OLD_YOUNG-EGG_UP	UP_Transcripts with at least 1.4-fold change in expression in old eggs (Table S5; Pubmed:18342300)
MIRNA_MM_WANG_MMU-MIR-302C-5P	WANG_MMU-MIR-302C-5P; Prediction of both conserved and nonconserved microRNA targets in animals 2008.
LIT_MM_SU_DELAYED-IMPLANTATION_EMBRYO_UP	Full list of differentially expressed genes from Digital gene expression data during delayed implantation (Table S3 ; Pubmed:21124741)
MIRNA_MM_BETEL_MMU-MIR-214_1	BETEL_MMU-MIR-214_1; Good mirSVR score Non-conserved; The microRNA.org resource: targets and expression.
SIDER_MM_CANDIDIASIS	Candidiasis from SIDER (SIDe Effect Resource), data from GeneSetDB.
MIRNA_MM_BETEL_MMU-MIR-467D	BETEL_MMU-MIR-467D; Good mirSVR score Non-conserved; The microRNA.org resource: targets and expression.
LIT_MM_KAWAHARA_RELA_MEF_TNF-ALPHA_DIFF	List of 2734 RelA targets (Table S3; Pubmed:21738489)
MSIGDB_MM_MILI_PSEUDOPODIA_HAPTOTAXIS_DN	Transcripts depleted from pseudopodia of NIH/3T3 cells (fibroblast) in response to haptotactic migratory stimulus by fibronectin, FN1 [GeneID=2335].
GO_CC_MM_TRANSCRIPTION_FACTOR_COMPLEX	GO:0005667 ; GO Term Name: transcription factor complex ; GO domain: cellular_component ; GO Evidence Code: IBA
LIT_MM_LACAZE_CT2A_IFN_VS_RISCFREE_IFN_RNAI_DN	DN CT2a_IFN+ vs. Riscfree_IFN+,RNAi gene expression clusters (Addi. file 8; Pubmed:19664281)
LIT_MM_HUANG_UBE2F_CTR_UP	Differential expression in any comparison; Ube2f versus Ctr (Table S5; Pubmed:19250909)
MIRNA_MM_WANG_MMU-MIR-125A-5P	WANG_MMU-MIR-125A-5P; Prediction of both conserved and nonconserved microRNA targets in animals 2008.
MIRNA_MM_WANG_MMU-MIR-194-2-3P	WANG_MMU-MIR-194-2-3P; Prediction of both conserved and nonconserved microRNA targets in animals 2008.
MICROCOSM_TARGETS_MM_HSA-MIR-32	hsa-miR-32 from MicroCosm Targets, data from GeneSetDB.
MIRNA_MM_WANG_MMU-MIR-488-3P	WANG_MMU-MIR-488-3P; Prediction of both conserved and nonconserved microRNA targets in animals 2008.
TFACTS_MM_GLI1	Target genes of transcription factor GLI1, predicted by TFactS, data from GeneSetDB.
HPO_MM_ABNORMALITY_OF_CELLULAR_IMMUNE_SYSTEM	Abnormality of cellular immune system from HPO (Human Phenotype Ontology), data from GeneSetDB.
MSIGDB_MM_BAKKER_FOXO3_TARGETS_DN	Genes down-regulated in I/11 erythroblast cells upon expression of an activated form of FOXO3 [GeneID=2309].
MIRNA_MM_WANG_MMU-MIR-302D-5P	WANG_MMU-MIR-302D-5P; Prediction of both conserved and nonconserved microRNA targets in animals 2008.
HPO_MM_ABNORMALITY_OF_LEUKOCYTES	Abnormality of leukocytes from HPO (Human Phenotype Ontology), data from GeneSetDB.
SIDER_MM_INFLAMMATION	Inflammation from SIDER (SIDe Effect Resource), data from GeneSetDB.
MICROCOSM_TARGETS_MM_HSA-MIR-185	hsa-miR-185 from MicroCosm Targets, data from GeneSetDB.
MIRNA_MM_BETEL_MMU-MIR-467C	BETEL_MMU-MIR-467C; Good mirSVR score Non-conserved; The microRNA.org resource: targets and expression.
MIRNA_MM_WANG_MMU-MIR-5134	WANG_MMU-MIR-5134; Prediction of both conserved and nonconserved microRNA targets in animals 2008.
HPO_MM_ABNORMALITY_OF_THE_SPLEEN	Abnormality of the spleen from HPO (Human Phenotype Ontology), data from GeneSetDB.
HPO_MM_SPLENOMEGALY	Splenomegaly from HPO (Human Phenotype Ontology), data from GeneSetDB.
LIT_MM_STEGMANN_MEDIUM-ENDODERM_VS_HIGH-VILLI_PRIMO-DATABASE_UP	Genes that are up-regulated from a medium level of expression in the endoderm to a high level of expression in the villi and that have promoters in the PRIMO database. The fold change column indicates the up-regulation from endoderm to villus (Table S3; Pubmed:16868071)
LIT_MM_SELMAN_MUSCLE_S6K_UP	Genes upregulated in muscle of S6K-/- mice compared to wild type mice. (Table S3a; Pubmed:19797661)
MIRNA_MM_WANG_MMU-MIR-5133	WANG_MMU-MIR-5133; Prediction of both conserved and nonconserved microRNA targets in animals 2008.
MSIGDB_MM_MILI_PSEUDOPODIA_CHEMOTAXIS_DN	Transcripts depleted in pseudopodia of NIH/3T3 cells (fibroblast) in response to the chemotactic migration stimulus by lysophosphatidic acid (LPA) [PubChem=3988].
LIT_MM_YANG_LIVER_MALE_ME1-KO_DIFF	Liver gene expression signature of Me1 male ko at p<0.05 (Table S9; Pubmed:19270708)
MIRNA_MM_WANG_MMU-MIR-217-5P	WANG_MMU-MIR-217-5P; Prediction of both conserved and nonconserved microRNA targets in animals 2008.
GO_BP_MM_DNA_REPAIR	GO:0006281 ; GO Term Name: DNA repair ; GO domain: biological_process ; GO Evidence Code: IEA
HPO_MM_ABNORMALITY_OF_THE_SKULL	Abnormality of the skull from HPO (Human Phenotype Ontology), data from GeneSetDB.
MIRNA_MM_BETEL_MMU-MIR-676_1	BETEL_MMU-MIR-676_1; Good mirSVR score Non-conserved; The microRNA.org resource: targets and expression.
LIT_MM_KRUTZFELDT_LIVERS_ANTAGOMIR-122-TREATED_VS_MM-ANTAGOMIR-122_DN	down-regulated ?1.4-fold in livers of mice treated with antagomir-122 compared to control mm-antagomir-122. Probe sets with absent (A) to absent changes were excluded. (Table S2; Pubmed:16258535)
LIT_MM_LI_12H_2-3-PH_LIVER_DN	down-12h-Differentially expressed genes after 2/3 PH relative to normal liver (Table S3; Pubmed:19700759)
MIRNA_MM_BETEL_MMU-MIR-29C_1	BETEL_MMU-MIR-29C_1; Good mirSVR score Non-conserved; The microRNA.org resource: targets and expression.
SIDER_MM_HAEMORRHOIDS	Haemorrhoids from SIDER (SIDe Effect Resource), data from GeneSetDB.
MIRNA_MM_GRIMSON_MIR-542-3P	GRIMSON_MIR-542-3P; Nonconserved_Family_Info; MicroRNA Targeting Specificity in Mammals: Determinants beyond Seed Pairing.
MIRNA_MM_BETEL_MMU-MIR-1839-5P	BETEL_MMU-MIR-1839-5P; Good mirSVR score Conserved; The microRNA.org resource: targets and expression.
MIRNA_MM_WANG_MMU-MIR-409-3P	WANG_MMU-MIR-409-3P; Prediction of both conserved and nonconserved microRNA targets in animals 2008.
LIT_MM_NASCIMENTO_MYC_DIFF	Myc-regulated genes (S17; Pubmed:22101514)
LIT_MM_HUANG_VIRGIN-MAMMARY-GLAND-NON-TG-MICE_VS_HYPERPLASTIC-MAMMARY-GLAND-MMTV-WNT-1TG_DN	down-List of genes that are differentially expressed between virgin mammary glands from non-TG mice and hyperplastic mammary glands from MMTV-Wnt-1 TG mice (Table S5; Pubmed:16207355)
LIT_MM_SOKOLOVIC_FASTING_INTESTINE_24H_DN	24h DNs_Fold changes in response to fasting (Additional file 1; Pubmed:17925015)
MIRNA_MM_KREK_MMU-MIR-293	KREK_MMU-MIR-293; Center for Comparative Functional Genomics; Department of Biology, New York University.
SIDER_MM_RECTAL_DISORDER	Rectal disorder from SIDER (SIDe Effect Resource), data from GeneSetDB.
LIT_MM_ESCUDERO_KK1-E13_DIFF	225 genes common to KK1 and E13,Comparison of differentially expressed genes in KK1 cells to E13, E16, and P0 (Addi. File 9; Pubmed:20167115)
MIRNA_MM_BETEL_MMU-MIR-376B	BETEL_MMU-MIR-376B; Good mirSVR score Non-conserved; The microRNA.org resource: targets and expression.

## Sheet: K-MOG10_ Enrichment
NAME	Description
LIT_MM_STILLWELL_4M_MDX_ADIPOSE-TISSUE_UP	UP_Comparison of gene expression profiles between 4month-old mdx and WT adipose tissues (Table S3; Pubmed:19277212)
LIT_MM_CREYGHTON_SUZ12-OCCUPIED_MES-CELL_DIFF	Suz12 occupied genes in mES cells (Table S6; Pubmed:18992931)
LIT_MM_WILHELM_FLA2_VS_FLB1_RNA-SEQ-RESULT_UP	up-regulated in FLA2/FLB1-RNA-seq results (Table S1; Pubmed:20980679)
LIT_MM_OTTO_BMP-4-TREATED-10T1-2_UP	up-Data from Microarray Analysis Between Uncommitted and BMP-4-Treated 10T1/2 Cells Data is represented as fold-change of BMP-4-treated 10T1/2 cells grown to postconfluence as compared to uncommitted 10T1/2 cells at postconfluence (Table S1; Pubmed:17204246)
LIT_MM_WANG_LOSS-OF-MLL1_UP	UP 2,265 genes were upregulated and 2,459 genes were downregulated upon loss of Mll1 (Table S2; Pubmed:19703992)
LIT_MM_CREYGHTON_H2AZ-ENRICHED_MES-CELL_DIFF	H2az enriched genes in mES cells (Table S2; Pubmed:18992931)
LIT_MM_STILLWELL_4M_WT-MDX_ADIPOSE-TISSUE_UP	UP_Comparison of gene expression profiles between 4month-old WT/mdx (20% of chimerism) and WT adipose tissues (Table S4; Pubmed:19277212)
LIT_MM_LIADAKI_SIDE-POPULATION_MUSCLE_VS_BONE-MARROW_UP	up-Fold change SP M/BM (Table S7; Pubmed:15652349)
LIT_MM_GEBEL_CS-EXPOSURE_5M-1D-PE_DN	DN wt 5 m + 1 d pe,the strong impact of CS(Cigarette Smoke) exposure on the transcriptome of rodent lung tissue cells (Table S1; Pubmed:20133372)
LIT_MM_GENNET_10.5DPC_MIDBRAIN-FP_DIFF	FP_genes differentially expressed in the mesencephalic FP and the adjacent, nonoverlapping ventral-lateral midbrain region (VL) of 10.5-d postcoitum (dpc) mouse embryos (Dataset S1; Pubmed:21576465)
LIT_MM_NISHIYAMA_HEATMAP_TFS_DIFF	Heatmap of gene expression change in ES cells after induction of various transcription factors,gene expression change after induction of TFs (48 hr, Dox-) (Table S2; Pubmed:19796622)
STITCH_MM_PROGESTERONE-CID100004920	progesterone(CID100004920) from STITCH (Search Tool for Interactions of Chemicals), data from GeneSetDB.
LIT_MM_GEBEL_CS-EXPOSURE_5M-13D-PE_DN	DN wt 5 m + 13 d pe,the strong impact of CS(Cigarette Smoke) exposure on the transcriptome of rodent lung tissue cells (Table S1; Pubmed:20133372)
LIT_MM_SZANTO_PPARG_VS_LYSCRE_IL-4_C_DN	Pg+--DN_Genes Regulated by IL-4 in Pparg+/?LysCre and Ppargfl/?LysCre Mouse Macrophages (Table S2; Pubmed:21093321)
LIT_MM_GEBEL_CS-EXPOSURE_5M_DN	DN wt 5 m,the strong impact of CS(Cigarette Smoke) exposure on the transcriptome of rodent lung tissue cells (Table S1; Pubmed:20133372)
LIT_MM_COLE_THREAT_SPLEEN-CD11B_UP	Spleen CD11b+?00 transcripts showing greatest upregulation in threat (Table S1; Pubmed:20176930)
LIT_MM_GEBEL_CS-EXPOSURE_2M_DN	DN wt 2 m,the strong impact of CS(Cigarette Smoke) exposure on the transcriptome of rodent lung tissue cells (Table S1; Pubmed:20133372)
LIT_MM_PASINI_SUZ12-BOUND-PROMOTERS-IN-ES-CELL-ESPRESSING-SCR-SHRNAS_DIFF	List of Suz12 bound promoters in ES cells espressing SCR shRNAs (Table S2; Pubmed:20075857)
LIT_MM_PAPAIAHGARI_SPV_2H_LUNG_NRF2_VS_NRF2_DN	Genes downregulated in the lungs of Nrf2-/- mice subjected to SpV as compared to Nr2+/+ mice SpV control (Supp Table E6; Pubmed:17901416)
LIT_MM_SHEN_EZH2_ESCELL_BFEZH1-TRANSCRIPT_DIFF	bfEzh1 ChIP-chip in Ezh2-/- ES cells. (Table S5; Pubmed:19026780)
LIT_MM_BUAC_NRG1_MELAN-INK4A-CELL_UP	UP Differentially expressed genes in NRG1-treated melan-Ink4a cells at 1.5-fold difference (Table S1; Pubmed:19659570)
LIT_MM_TOLGYESI_OVA_28D_30D_31D_LUNG_DIFF	DIFF_gene list containing transcripts which showed at least >2.0-fold statistically differential expression between the experimental groups (Table S6; Pubmed:19556304)
LIT_MM_GEBEL_CS-EXPOSURE-LOW_KO-5M_DN	DN ko, low,expression data from Nrf 2 -/- and wt mice exposed for 5 months to all three doses (low, medium, and high, see above) were analyzed,RNA samples prepared from lungs of sham-exposed nrf 2 ko and wt mice or mice exposed to CS (1500 lg [low], 2250 lg [medium], or 3000 lg[high] TPM/l per day, 5 days/week) for 5 months were analyzed (Table S2; Pubmed:20133372)
SIDER_MM_NIGHT_SWEATS	Night sweats from SIDER (SIDe Effect Resource), data from GeneSetDB.
LIT_MM_GEBEL_CS-EXPOSURE_KO-5M_DN	DN ko 5 m,the strong impact of CS(Cigarette Smoke) exposure on the transcriptome of rodent lung tissue cells (Table S1; Pubmed:20133372)
SIDER_MM_LIBIDO_DECREASED	Libido decreased from SIDER (SIDe Effect Resource), data from GeneSetDB.
LIT_MM_CREYGHTON_HISTONE-VARIANT-H2AZ_ES-CELL_CLUSTER-2_DIFF	c2-Gene clusters derived from K-means cluster analysis--The histone variant H2AZ is enriched at Polycomb group target genes in ES cells and is necessary for proper execution of developmental programs (Table S8; Pubmed:18992931)
LIT_MM_NISHIYAMA_TF-ESX1_ES-CELL_UP	Esx1 Genes up-regulated or down-regulated >=2 fold in response to manipulation of transcription factors (Table S3; Pubmed:19796622)
LIT_MM_HANDLEY_PP-MICE_INFECTION-Y.ENTEROCOLITICA_DIFF	regulated in the PP of mice (n = 10, C57BL/6j) following oral infection with Y. enterocolitica (5 x 10E8 cfu) as determined by Affymetrix GeneChip MGU74Av2 (Table S3; Pubmed:16717182)
MSIGDB_MM_ESC_J1_UP_LATE.V1_UP	Genes up-regulated during late stages of differentiation of embryoid bodies from J1 embryonic stem cells.
LIT_MM_SHEN_ESCELL_H3K27ME3-TARGET_BFEZH1-TARGET_DIFF	WT-H3K27me3 target gene set (Table S8; Pubmed:19026780)
LIT_MM_TOMCZAK_MYOGENIC_2D_C3_DIFF	List of Affymetrix probe sets classified into Group III clusters. All fold change values are relative to day -2 (Table S3; Pubmed:14688207)
LIT_MM_NISHIYAMA_TF-KLF4_ES-CELL_UP	Klf4 Genes up-regulated or down-regulated >=2 fold in response to manipulation of transcription factors (Table S3; Pubmed:19796622)
LIT_MM_HUBER_LYMPHOTOXIN-BETA_LYMPH-NODE_FOLLICULAR-DENDRITIC-CELL_UP	up in Table 3 by lower bound of FC (Table 3; Pubmed:15843551)
LIT_MM_SZANTO_PPARGFL_LYSCRE_IL-4_C_DN	Pgfl/?-DN_Genes Regulated by IL-4 in Ppar?+/?LysCre and Ppargfl/?LysCre Mouse Macrophages (Table S2; Pubmed:21093321)
LIT_MM_HUNTER_MVT-1-TUMOR_AKR_DBA_F1-HOST_DIFF	Mouse expression signature from Mvt-1 transplant tumors in AKR versus DBA F1 hosts (Table S3; Pubmed:19118016)
LIT_MM_ABEL_TESTICULAR-TRANSCRIPT_FSH_72H_DN	DN at 72h_Effects of FSH treatment on testicular transcript levels (Table S2B-C; Pubmed:19136570)
LIT_MM_LANGLAIS_LIF_GC_DIFF	List of LIF and/or glucocorticoid regulated genes (Table S2; Pubmed:18927629)
LIT_MM_NISHIYAMA_TF-SOX2_ES-CELL_DN	Sox2 Genes up-regulated or down-regulated >=2 fold in response to manipulation of transcription factors (Table S3; Pubmed:19796622)
LIT_MM_LINDSLEY_D6_DKK-PLUS_VS_DKK_UP	up-d6_Dkk+/d3_Dkk- (Table S1; Pubmed:18593559)
LIT_MM_TIMMONS_WHITE-PREADIPOCYTE_4D_8D_UP	White preadipocyte up-regulated gene changes from day 4 to day 8 in culture (Dataset S2; Pubmed:17360536)
SIDER_MM_SLEEP_DISORDER	Sleep disorder from SIDER (SIDe Effect Resource), data from GeneSetDB.
LIT_MM_VISEL_VIVO_P300_LIMB_DN	Limb Under-Expressed Genes (Table S11; Pubmed:?9212405)
LIT_MM_BISAILLON_HOXA9-MEIS1_UP	Genes upregulated by at least two-fold compared to the parental Hoxa9 population--Hoxa9 + Meis1 (Table S2; Pubmed:21900201)
LIT_MM_MATTHEW_MAMMARY-FIBROBLAST_UP	up-Mammary fibroblasts versus reference population (Table S4; Pubmed:18067675)
LIT_MM_CREYGHTON_HISTONE-VARIANT-H2AZ_ES-CELL_CLUSTER-3_DIFF	c3-Gene clusters derived from K-means cluster analysis--The histone variant H2AZ is enriched at Polycomb group target genes in ES cells and is necessary for proper execution of developmental programs (Table S8; Pubmed:18992931)
GENESIGDB_MM_ASTOLFI_05_BREAST_2	Mouse Breast_Astolfi05_1104genes_TumorGenes; 15793299-TableC; data from GeneSigDB: http://compbio.dfci.harvard.edu/genesigdb/download/ALL_SIGSv4.gmt.
LIT_MM_VISEL_VIVO_P300_FOREBRAIN_DN	Forebrain Under-Expressed Genes (Table S9; Pubmed:?9212405)
STITCH_MM_N-ACETYLGLUCOSAMINE-CID000024139	N-acetylglucosamine(CID000024139) from STITCH (Search Tool for Interactions of Chemicals), data from GeneSetDB.
LIT_MM_ANDRES-AGUAYO_MSI2_LSK_UP	UP_Gene expression data for probes misregulated in Msi2-/- LSK cells (Table S4; Pubmed:21613258)
SIDER_MM_PERINEAL_PAIN_FEMALE	Perineal pain female from SIDER (SIDe Effect Resource), data from GeneSetDB.
LIT_MM_PAPAIOANNOU_MUTANT-TESTIS_P5_UP	upregulated genes in mutant testis at P5 ( ? 2 fold change) (Table S3; Pubmed:19071104)
SIDER_MM_BREAST_ENLARGEMENT	Breast enlargement from SIDER (SIDe Effect Resource), data from GeneSetDB.
MSIGDB_MM_CHYLA_CBFA2T3_TARGETS_DN	Genes down-regulated in immature bone marrow progenitor cells upon knock out of CBFA2T3 [GeneID=863].
LIT_MM_ARENSBERGEN_H3K27ME3_FACS-PURIFIED-BETA-CELLS_DIFF	H3K27me3+ genes in FACS purified ?-cells. (Table S1; Pubmed:20395405)
SIDER_MM_PERINEAL_PAIN	Perineal pain from SIDER (SIDe Effect Resource), data from GeneSetDB.
SIDER_MM_NOCTURIA	Nocturia from SIDER (SIDe Effect Resource), data from GeneSetDB.
SIDER_MM_HYPERTROPHY	Hypertrophy from SIDER (SIDe Effect Resource), data from GeneSetDB.
LIT_MM_ROLLETSCHEK_2FOLD_ES-0D_VS_MULTILINEAGE-PROGENITOR-CELL_5-9D_UP	two- or more-fold up-regulated in wt ES cells (0d) vs. multilineage progenitor cells at 5+9d (FC: fold change) (Table S3; Pubmed:19876843)
STITCH_MM_PROGESTERONE-CID000005994	progesterone(CID000005994) from STITCH (Search Tool for Interactions of Chemicals), data from GeneSetDB.
LIT_MM_NISHIYAMA_TF-DLX3_ES-CELL_UP	Dlx3 Genes up-regulated or down-regulated >=2 fold in response to manipulation of transcription factors (Table S3; Pubmed:19796622)
LIT_MM_SRIDHARAN_BINDINGBINDING_PARTIALLY-REPROGRAMMED-CELL_ES-CELL_DN	DN +Binding/-Binding and expression data from Figure 2B in the order presented in the figure,Differential Binding between Partially Reprogrammed Cells and ES Cells Correlates with Expression Differences (Table S6; Pubmed:19167336)
SIDER_MM_VAGINAL_DRYNESS	Vaginal dryness from SIDER (SIDe Effect Resource), data from GeneSetDB.
LIT_MM_NISHIYAMA_TF-GATA3_ES-CELL_UP	Gata3 Genes up-regulated or down-regulated >=2 fold in response to manipulation of transcription factors (Table S3; Pubmed:19796622)
LIT_MM_MILLER_6D-GFP-CELL_D0-D4-D6-GFP-CELL_FDR0.05_UP	FDR0.05_UP_Results of array comparison (Table S1; Pubmed:18478100)
SIDER_MM_ABDOMINAL_BLOATING	Abdominal bloating from SIDER (SIDe Effect Resource), data from GeneSetDB.
LIT_MM_ZHENG_P53PTEN_VS_P53_NSC_DIFFERENTIATION-INDUCTION_1D_UP	UP_Top 410 genes differentially expressed in p53/Pten double-null and p53-null NSCs 1 day post differentiation induction was generated using the SAM statistic (Table S2; Pubmed:18948956)
LIT_MM_GEBEL_CS-EXPOSURE-MED_KO-5M_DN	DN ko, med,expression data from Nrf 2 -/- and wt mice exposed for 5 months to all three doses (low, medium, and high, see above) were analyzed,RNA samples prepared from lungs of sham-exposed nrf 2 ko and wt mice or mice exposed to CS (1500 lg [low], 2250 lg [medium], or 3000 lg[high] TPM/l per day, 5 days/week) for 5 months were analyzed (Table S2; Pubmed:20133372)
LIT_MM_GEBEL_CS-EXPOSURE-HIGH_KO-5M_DN	DN ko, high,expression data from Nrf 2 -/- and wt mice exposed for 5 months to all three doses (low, medium, and high, see above) were analyzed,RNA samples prepared from lungs of sham-exposed nrf 2 ko and wt mice or mice exposed to CS (1500 lg [low], 2250 lg [medium], or 3000 lg[high] TPM/l per day, 5 days/week) for 5 months were analyzed (Table S2; Pubmed:20133372)
LIT_MM_TURK_INBRED-STRAIN_DIFF	Differentially expressed genes between mouse inbred strains are selected with a false discovery rate of 10, 15, and 20% (File S1; Pubmed:15317656)
GENESIGDB_MM_WANG_07_OVARIAN_3	Mouse Ovarian_Wang07_85genes; 18234966-Table2; data from GeneSigDB: http://compbio.dfci.harvard.edu/genesigdb/download/ALL_SIGSv4.gmt.
LIT_MM_WILHELM_FLA2_VS_FLB1_MICROARRAY-RESULT_UP	up-regulated in FLA2/FLB1-Microarray results (Table S1; Pubmed:20980679)
LIT_MM_KIRSTETTER_LL-LIC_MAC1-CKIT-CELL_DN	down-differentially expressed (FDR = 0.01) between LL-LIC and control Mac1+cKit+ cells are listed in order of decreasing statistical significance. (Table S1; Pubmed:18394553)
LIT_MM_REYNOLDS_EED-NULL-ES_VS_UP	Summary of all genes showing increased expression in Eed null ES cells relative to wild type cell lines (Leeb et al 2010, Genes Dev 24: 265-276) (Table S2; Pubmed:22139358)
LIT_MM_REUTER_STROMAL_EPITHELIAL-TISSUE_DIFF	Stromal signature (Table S3; Pubmed:19477427)
LIT_MM_GONZALEZ-DE-AGUILAR_SKELETAL-MUSCLE_G86R_AXOTOMIZED-MICE_DIFF	Regulated genes in skeletal muscle of G86R and axotomized mice (Table S1; Pubmed:18000159)
LIT_MM_WALKER_PCL2-IP_NO-AB-CONTROL_ESC_DIFF	PCL2 IP/No Ab control,ChIP DNA was sequenced using the Solexa 1G platform, aligned to the mouse genome and enrichment analysis was performed,resulting in 3,847 enriched regions with a FDR of 0.3% (Table S3; Pubmed:20144788)
LIT_MM_NISHIYAMA_TF-ASCL2_ES-CELL_DN	Ascl2 Genes up-regulated or down-regulated >=2 fold in response to manipulation of transcription factors (Table S3; Pubmed:19796622)
LIT_MM_ACEVEDO_IFGFR1-MEDIATEDPCA_52WEEK_UP	up-Gene Expression Profile for iFGFR1-Mediated PCa. -52week full (Table S3; Pubmed:18068632)
LIT_MM_PASINI_JARID2-BOUND-PROMOTERS-IN-ES-CELL-ESPRESSING-SCR-SHRNAS_DIFF	List of Jarid2 bound promoters in ES cells espressing SCR shRNAs (Table S2; Pubmed:20075857)
GO_MF_MM_CALCIUM_ION_BINDING	GO:0005509 ; GO Term Name: calcium ion binding ; GO domain: molecular_function ; GO Evidence Code: IDA
SIDER_MM_MOOD_SWINGS	Mood swings from SIDER (SIDe Effect Resource), data from GeneSetDB.
GENESIGDB_MM_WRIGHT_08_BREAST_1	Mouse Breast_Wright08_339genes; 18394172-S3GeneList; data from GeneSigDB: http://compbio.dfci.harvard.edu/genesigdb/download/ALL_SIGSv4.gmt.
LIT_MM_SOTGIA_CAV-3_VIRGIN-MAMMARY-GLAND_DN	DN_list represents differentialy regulated genes between Cav-3 KO vs wildtype mouse mammary glands. (Table S1; Pubmed:19164602)
MSIGDB_MM_WONG_ADULT_TISSUE_STEM_MODULE	The 'adult tissue stem' module: genes coordinately up-regulated in a compendium of adult tissue stem cells.
GO_BP_MM_G-PROTEIN_COUPLED_RECEPTOR_SIGNALING_PATHWAY	GO:0007186 ; GO Term Name: G-protein coupled receptor signaling pathway ; GO domain: biological_process ; GO Evidence Code: IEA
STITCH_MM_N-ACETYLGLUCOSAMINE-CID100000899	N-acetylglucosamine(CID100000899) from STITCH (Search Tool for Interactions of Chemicals), data from GeneSetDB.
GO_MF_MM_G-PROTEIN_COUPLED_RECEPTOR_ACTIVITY	GO:0004930 ; GO Term Name: G-protein coupled receptor activity ; GO domain: molecular_function ; GO Evidence Code: IEA
LIT_MM_GALLINA_CULTURED-CD11B-SPLENOCYTE_SPLEEN-TUMOR-BEARING_VS_NORMAL_DN	underexpressed-Differentially expressed transcripts in cultured CD11b+ from the spleen of tumor-bearing mice as compared to normal counterparts (Table S3; Pubmed:17016559)
GO_CC_MM_CYTOSKELETON	GO:0005856 ; GO Term Name: cytoskeleton ; GO domain: cellular_component ; GO Evidence Code: IEA
LIT_MM_MORRIS_ENRICHED_EGFP-POSITIVE_VS_EGFP-NEGATIVE_GENESPRING_UP	up-Genes identified as enriched in stem cells by Genespring software. The fold changes of expression levels between 3 pairs of EGFP-positive and EGFP-negative samples were >2. (Table S3; Pubmed:15024388)
LIT_MM_SZANTO_STAT6_RSG_DN	Total RSG-repressed_Genes Regulated by PPAR? in Wild-Type and Stat6?/? Mouse Macrophages (Table S3; Pubmed:21093321)
LIT_MM_PACHECO-PINEDO_LUNG_CC10CRE-KRASG12D-CTNNB1EX3FLOX_TUMOR_EPITHELIUM_DIFF	Double mutant specific genes (Table S1; Pubmed:21490395)
LIT_MM_RENTHAL_18.5DPC-DN-UTERINE_MIR-200B-C-429_UP	UP_compare sets of down-regulated uterine genes at 18.5 dpc with the strongest miR-200b/c/429 TargetScan context scores (Dataset S2; Pubmed:21079000)
LIT_MM_MILLER_6D-GFP-CELL_D0-D4-D6-GFP-CELL_FDR0.01_UP	FDR0.01_UP_Results of array comparison (Table S1; Pubmed:18478100)
LIT_MM_VAN-NAS_ADIPOSE_FEMALE_BLUE_CHR1_DIFF	adipose_female_blue_chr1 (Table S8; Pubmed:18974276)
LIT_MM_NISHIYAMA_TF-TCF3_ES-CELL_UP	Tcf3 Genes up-regulated or down-regulated >=2 fold in response to manipulation of transcription factors (Table S3; Pubmed:19796622)
LIT_MM_BLUM_UGE-ONLY_STEM_PROGENITOR-CLUSTER-1050_DIFF	UGE-only Cluster #1050 Transcripts significantly expressed in stem/progenitor clusters. Lists of transcripts that were significantly highly expressed in each of the clusters (UGE-only, UGE+Sca-1Hi, Sca-1Hi-only, Sca-1Hi+Sca-1Lo). The relative expression values (LR) compared to the average expression values of control samples (Sca-1Neg) are presented. Each folder contains the data of a separate cl…
LIT_MM_ZIMMER_C-IIA_DEVELOPMENTAL-NEUROTOXICITY_DIFF	Cluster IIa--Complete listing of the assignment of genes to the different clusters--Cluster analysis of expression kinetics, and bioinformatic identification of verrepresented gene ontologies revealed waves of regulation relevant for DNT testing--developmental neurotoxicity. (Fig.S3; Pubmed:20865013)
LIT_MM_LACAZE_SIRNAS-WITH_WITHOUT-IFNGAMMA_DIFF	Genes differentially regulated by targeting siRNAs in both the absence and presence of IFN? (456 genes) (Addi. file 7; Pubmed:19664281)
LIT_MM_CARTER_HIPPOCAMPUS-S8_VS_SR1_S10_VS_SR1_DIFF	A heat-map view of genes differentially expressed in hippocampus with either S8 compared to SR1, or S10 compared to SR1 is shown. (Fig.3a; Pubmed:15960800)
SIDER_MM_VAGINAL_DISCHARGE	Vaginal discharge from SIDER (SIDe Effect Resource), data from GeneSetDB.
LIT_MM_LE-PAPE_ASP_DEVELOPMENT_CELL-ADHESION_ECM-REMODELING_UP	Genes up-regulated by ASP, involved in development, cell-adhesion and/or extracellular-matrix (ECM) remodeling, analyzed from the microarray data (Table S4; Pubmed:19174519)
STITCH_MM_RETINOIC_ACID-CID100005538	retinoic acid(CID100005538) from STITCH (Search Tool for Interactions of Chemicals), data from GeneSetDB.
LIT_MM_ABRANCHES_ROSETTES_EMBRYONIC-STEM-CELL_NEUROGENESIS_DIFF	Worksheet Rosettes: list of 919 probe sets (673 genes) that belong to the Rosette expression group. --Neural Differentiation of Embryonic Stem Cells In Vitro: A Road Map to Neurogenesis in the Embryo (Table S1; Pubmed:19621087)
LIT_MM_NISHIYAMA_TF-SOX9_ES-CELL_UP	Sox9 Genes up-regulated or down-regulated >=2 fold in response to manipulation of transcription factors (Table S3; Pubmed:19796622)
LIT_MM_TERRADOS_AFTER-SHORTTERM_DEPLETION-SP2-MEFS_DN	down-List of ?1.5 fold de-regulated genes after shortterm depletion of Sp2 in MEFs. (Table S5; Pubmed:22684502)
LIT_MM_KENDRICK_BASAL_VS_MYOEPITHELIAL-CELL_DIFF	Genes characteristic of basal/myoepithelial cells. (Table S4; Pubmed:19063729)
LIT_MM_WAUTHIER_SEX-SPECIFIC_REMOVAL-REDUNDANT_DIFF	This table contains data for all 1380 sex-specific genes after removal of redundant sex-specific probes as indicated in Table S1A (Table S1B ; Pubmed:20150183)
LIT_MM_ENDOH_RING1A_B-DKO_ESCELL_DN	Ring1AB-dKO only_A list of genes derepressed more than 2-fold only in Ring1A/B-KO ES cells (Table S2-workbook1; Pubmed:18339675)
MPO_MM_INCREASED_SENSITIVITY_TO_INDUCED_MORBIDITY_MORTALITY	increased sensitivity to induced morbidity/mortality from MPO (Mammalian Phenotype Ontology), data from GeneSetDB.
GO_BP_MM_RESPONSE_TO_DRUG	GO:0042493 ; GO Term Name: response to drug ; GO domain: biological_process ; GO Evidence Code: IEA
MIRNA_MM_BETEL_MMU-MIR-451	BETEL_MMU-MIR-451; Good mirSVR score Non-conserved; The microRNA.org resource: targets and expression.
LIT_MM_CHAKRABORTY_E12.5-AV-CUSHION_E17.5-AV-VALVE_PREOSTEOBLAST-MC3T3-D5-D14-D21_DIFF	Comparison of genes differentially expressed during valve development (E12.5 AV Cushion versus E17.5 AV valves) with gene expression profiles of primary osteoblasts after 5 (OB-d5), 14 (OB-d14) and 21 (OB-d21) days of differentiation (Table S2; Pubmed:18612084)
LIT_MM_DRISKELL_GFP-CD133-PLUS_VS_GFP-CD133-MINUS_GFP-CD133-PLUS_UP	UP Genes differentially expressed in GFP+ CD133+ dermal cells compared with GFP? CD133? and GFP? CD133+ dermal cells (Table S2; Pubmed:19605494)
LIT_MM_LI_MTF2_ES-CELL_DIFF	Top 1000 genes targeted by MTF2 in ES cells (Table S3; Pubmed:20123894)
LIT_MM_PRONK_PREMEGE_PREGM-CLP_UP	pre MegE cluster_Expression data for each cell fraction represent mean from 3 arrays/cell type (5 arrays for pre MegE) (Table S2; Pubmed:18371379)
MIRNA_MM_BETEL_MMU-MIR-669H-5P	BETEL_MMU-MIR-669H-5P; Good mirSVR score Non-conserved; The microRNA.org resource: targets and expression.
LIT_MM_PLASARI_10H-TGF-BETA1_DN	DN 10h TGF-?1 treated vs untreated TGF-?1 regulated genes, as deduced from mRNA profiling assays (Table S3; Pubmed:19752192)
LIT_MM_NISHIYAMA_TF-ZSCAN4C_ES-CELL_UP	Zscan4c Genes up-regulated or down-regulated >=2 fold in response to manipulation of transcription factors (Table S3; Pubmed:19796622)
LIT_MM_TERRADOS_AFTER-LONGTERM_DEPLETION-SP2-MEFS_UP	up-List of ?1.5 fold de-regulated genes after longterm depletion of Sp2 in MEFs (Table S6; Pubmed:22684502)
HPO_MM_ABNORMALITY_OF_THE_VASCULATURE	Abnormality of the vasculature from HPO (Human Phenotype Ontology), data from GeneSetDB.
LIT_MM_TIMMONS_WHITE-BROWN-PREADIPOCYTE-OVERLAP_UP	WAT and BAT up overlap (Dataset S3; Pubmed:17360536)
LIT_MM_GEBEL_CS-EXPOSURE_KO-5M-1D-PE_DN	DN ko 5 m + 1 d pe,the strong impact of CS(Cigarette Smoke) exposure on the transcriptome of rodent lung tissue cells (Table S1; Pubmed:20133372)
LIT_MM_DENOLET_SCARKO_UP	up-Differentially expressed transcripts-SCARKO/Control (Table S1; Pubmed:16166195)
LIT_MM_TIMMONS_DIFFERENTIATION_WHITE-BROWN-PREADIPOCYTE-OVERLAP_UP	UP_OVERLAP_Overlapping gene list from brown and white preadipoctyes modulated during differentiation (Dataset S3; Pubmed:17360536)
L2L_MM_IDX_TSA_UP_CLUSTER3	Strongly up-regulated at 16-24 hours during differentiation of 3T3-L1 fibroblasts into adipocytes with IDX (insulin, dexamethasone and isobutylxanthine), vs. fibroblasts treated with IDX + TSA to prevent differentiation (cluster 3)
GO_CC_MM_EXTRACELLULAR_MATRIX	GO:0031012 ; GO Term Name: extracellular matrix ; GO domain: cellular_component ; GO Evidence Code: IEA
MIRNA_MM_GRIMSON_MIR-544_544AB_544-3P	GRIMSON_MIR-544_544AB_544-3P; Nonconserved_Family_Info; MicroRNA Targeting Specificity in Mammals: Determinants beyond Seed Pairing.
LIT_MM_KIM_ALB-CRE-HIF2DPA_VS_ALB-CRE-HIF1DPA_LIVER_UP	top 200 genes overexpressed in Alb-Cre:HIF2dPA relative to Alb-Cre:HIF1dPA (Table S1; Pubmed:16977322)
LIT_MM_SCIUTO_EXPOSURE-PHOSGENE_DIFF	Genes most significantly (Bonferroni-corrected p<0.0001) modulated by exposure to phosgene. (Table S2; Pubmed:16300373)
LIT_MM_WANG_PROMOTER_MLL1MEFS_H3K4ME3_DN	Reduction of H3K4me3 levels in the Mll1_/_ MEFs was only observed at 525 promoters (Table S1; Pubmed:19703992)
LIT_MM_JIANG_ESCELL_TRIPLE-RNAI_4D_UP	UP_4d_List of differentially expressed genes after Klf2, Klf4 and Klf5 depletion (Table S3; Pubmed:18264089)
LIT_MM_OJALVO_INVASIVE-TAM_TRANSCRIPT-M2318_DN	UP Invasive TAM expression table for significantly (FDR=1%) called transcripts (Suppl. Table; Pubmed:20018620)
LIT_MM_CRAWFORD_E18.5_1.5FOLD_PANCREATIC-ISLET_DN	down- Transcripts down-regulated by 1.5-fold or greater at e18.5. (Table S2A; Pubmed:18297134)
STITCH_MM_ANDROGEN-CID000005995	androgen(CID000005995) from STITCH (Search Tool for Interactions of Chemicals), data from GeneSetDB.
LIT_MM_BLOMBERG_ITK_CD4-T-CELL_UP	UP_324 differentially expressed probe-set represent the core group of unstimulated Itk-defective CD4? T-cells (Additional file 8; Pubmed:19450280)
LIT_MM_GRECO_BULGE_HG_BULGE_EPIDERMIS_ORS_BULGE_UP	Refining the Bulge Signature: Genes Upregulated in the Bulge When Compared Against Both Epidermal and Hair Lineages (Table S1 ; Pubmed:19200804)
LIT_MM_ULLOA-MONTOYA_MAPC_ESC-NS_UP	Genes expressed in MAPC at least two fold higher than ESC and NS (Table S4; Pubmed:17683608)
LIT_MM_GIBBONS_344-SQ-ONLY_SYNGENEIC-TUMOR_UP	3 - up 344 SQ only,mRNA expression data for syngeneic tumors comparing 393P, 393LN and 344SQ (Table S2; Pubmed:19759262)
LIT_MM_SELMAN_MUSCLE_S6K_DN	Genes downregulated in muscle of S6K-/- mice compared to wild type mice. (Table S3b; Pubmed:19797661)
LIT_MM_FRATINI_SKIN_14MEV-NEUTRON_0.2GY-6H-24H_1GY-6H-24H_DIFF	List of 440 genes modulated at least 1.5 fold in two different conditions in comparison to the sham-irradiated control (Table S1; Pubmed:21556364)
LIT_MM_NISHIYAMA_TF-EOMES_ES-CELL_UP	Eomes Genes up-regulated or down-regulated >=2 fold in response to manipulation of transcription factors (Table S3; Pubmed:19796622)
LIT_MM_VALOR_VP16-CREB_A-CREB_BD_HD_EPILEPSY_AD_AGING_DIFF	Genes significantly altered in several neurodegenerative conditions (Table S3; Pubmed:20395962)
LIT_MM_BROSKE_DNMT1_VS_DNMT1_CHIP-HSCS-FLT3-LSK_DN	DN Probe set list of genes differentially expressed in Dnmt1 +/+ versus Dnmt1 ?chip HSCs (Flt3?LSK) (Table S2; Pubmed:19801979)
LIT_MM_DEROO_TGF_D7E-MAMMARY-GLAND_UP	up-TGF?-responsive genes also present in the d7E mammary gland dataset. (Table S6; Pubmed:19484750)
LIT_MM_MILLER_6D-GFP-CELL_D0-D4-D6-GFP-CELL_FDR0.001_UP	FDR0.001_UP_Results of array comparison (Table S1; Pubmed:18478100)
LIT_MM_GREEN_B-CELL-SUBSET_UP	UP_B-cell subset classification signature probes (Dataset S1-table s2; Pubmed:21282644)
LIT_MM_WANG_GENE-REQUIRE-MLL1_H3K4-TRIMETHYLATION-TRANSCRIPTION_DIFF	Mll1 targets transcriptional regulators, 299 genes that require Mll1 for both H3K4 trimethylation and transcription (Table S4; Pubmed:19703992)
LIT_MM_ABEL_TESTICULAR-TRANSCRIPT_FSH_24H_DN	DN at 24h_Effects of FSH treatment on testicular transcript levels (Table S2B-B; Pubmed:19136570)
LIT_MM_MOLYNEUX_C7_TUMOUR_BLG-CRE-BRCA1_P53_SOM_DIFF	C7-Variable expression in tumours--Gene Expression Clusters in Blg-Cre Brca1f/f p53+/? Tumors Identified by SOM Analysis. (Table S4; Pubmed:20804975)
LIT_MM_NASCIMENTO_ALOX12_DIFF	Alox12-like regulated genes (Table S3; Pubmed:22101514)
MIRNA_MM_GRIMSON_MIR-202-3P	GRIMSON_MIR-202-3P; Predicted_Targets_Info; MicroRNA Targeting Specificity in Mammals: Determinants beyond Seed Pairing.
CTD_MM_TOPOTECAN	Topotecan from CTD (Comparative Toxicogenomics Database), data from GeneSetDB.
LIT_MM_SCHAEFFER_EMBRYO_ANDROGEN_48H_UP	UP_H48: Differentially Expressed Genes (Table S3; Pubmed:18794802)
MPO_MM_REDUCED_FEMALE_FERTILITY	reduced female fertility from MPO (Mammalian Phenotype Ontology), data from GeneSetDB.
LIT_MM_TOLGYESI_OVA_30D_LUNG_DN	DN_gene list containing transcripts which showed at least >2.0-fold statistically differential expression in group 2 relative to the common reference control (Table S4; Pubmed:19556304)
LIT_MM_MARET_BRAIN_SLEEP-DEPRIVATION_TIME-OF-DAY-PATTERN_DIFF	391 probe set still rhythmic after sleep deprivation (Table S4; Pubmed:18077435)
LIT_MM_AYOUB_E14.5_BRAIN_VZ?SVZ-IZ_DIFF	VZ?SVZ-IZ_Summary of GO functional analysis by biological and disease processes (Table S3; Pubmed:21873192)
LIT_MM_GEBEL_CS-EXPOSURE-HIGH_5M_DN	DN wt, high,expression data from Nrf 2 -/- and wt mice exposed for 5 months to all three doses (low, medium, and high, see above) were analyzed,RNA samples prepared from lungs of sham-exposed nrf 2 ko and wt mice or mice exposed to CS (1500 lg [low], 2250 lg [medium], or 3000 lg[high] TPM/l per day, 5 days/week) for 5 months were analyzed (Table S2; Pubmed:20133372)
MSIGDB_MM_ACEVEDO_FGFR1_TARGETS_IN_PROSTATE_CANCER_MODEL_UP	Genes up-regulated during prostate cancer progression in the JOCK1 model due to inducible activation of FGFR1 [GeneID=2260] gene in prostate.
LIT_MM_CAMATEROS_RES_A_J_DIFF	Genes whose expression was significantly altered following resiquimod(RES) treatment in A/J mice. (Table S10; Pubmed:19491150)
MPO_MM_FEMALE_INFERTILITY	female infertility from MPO (Mammalian Phenotype Ontology), data from GeneSetDB.
LIT_MM_NISHIYAMA_TF-NR2F2_ES-CELL_UP	Nr2f2 Genes up-regulated or down-regulated >=2 fold in response to manipulation of transcription factors (Table S3; Pubmed:19796622)
MSIGDB_MM_BURTON_ADIPOGENESIS_3	Strongly up-regulated at 16-24 h during differentiation of 3T3-L1 cells (fibroblast) into adipocytes.
LIT_MM_SHELL_LPS-STIMULATED-RAW-MACROPHAGE_DN	Genes that decreased expression in LPS-stimulated RAW macrophages (Table S2; Pubmed:16207706)
MSIGDB_MM_PLASARI_TGFB1_TARGETS_10HR_UP	Genes up-regulated in MEF cells (embryonic fibroblast) upon stimulation with TGFB1 [GeneID=7040] for 10 h.
MSIGDB_MM_LE_EGR2_TARGETS_UP	Genes up-regulated in P14 nerves of transgenic mice having hypomorhic (reduced function) allele of EGR2 [GeneID=1959].
STITCH_MM_RETINOIC_ACID-CID000444795	retinoic acid(CID000444795) from STITCH (Search Tool for Interactions of Chemicals), data from GeneSetDB.
GENESIGDB_MM_BUONOMO_11_VIRAL_1	Mouse Viral_Buonomo11_5307genes; 21205295-TableS1; data from GeneSigDB: http://compbio.dfci.harvard.edu/genesigdb/download/ALL_SIGSv4.gmt.
MSIGDB_MM_MCBRYAN_PUBERTAL_BREAST_3_4WK_UP	Genes up-regulated during pubertal mammary gland development between weeks 3 and 4.
TFACTS_MM_SP1	Target genes of transcription factor SP1, predicted by TFactS, data from GeneSetDB.
LIT_MM_PETREMAND_HDLS-STARVATION_A_UP	A+: HDL decreases the stimulation effect of starvation (antagonistic effect) genes regulated by HDLs during serum deprivation(starvation) (nteraction of both? (Table S5; Pubmed:19574449)
LIT_MM_DANG-DO_GCN_VS_GCN_LIVER-WITH-ALL-AMINO-ACID_UP	List of genes whose mRNA abundance increased in the absence of GCN2 in livers perfused with all amino acids. (Table S2A; Pubmed:19509078)
CTD_MM_DIHYDROTESTOSTERONE	Dihydrotestosterone from CTD (Comparative Toxicogenomics Database), data from GeneSetDB.
STITCH_MM_PGF2_ALPHA-CID005280363	PGF2 alpha(CID005280363) from STITCH (Search Tool for Interactions of Chemicals), data from GeneSetDB.
MPO_MM_ABNORMAL_NEUTROPHIL_PHYSIOLOGY	abnormal neutrophil physiology from MPO (Mammalian Phenotype Ontology), data from GeneSetDB.
LIT_MM_CRAWFORD_E18.5_PANCREATIC-ISLET_DN	down-Statistically significant (p < 0.05) transcripts down-regulated at e18.5. (Table S1A; Pubmed:18297134)
MIRNA_MM_VERGOULIS_MMU-LET-7B-5P	VERGOULIS_MMU-LET-7B-5P; TarBase 6.0: capturing the exponential growth of miRNA targets with experimental support.
LIT_MM_NISHIYAMA_TF-MYOD1_ES-CELL_UP	Myod1 Genes up-regulated or down-regulated >=2 fold in response to manipulation of transcription factors (Table S3; Pubmed:19796622)
LIT_MM_RICKETTS_CAFESTOL-FED_E3L-MICE_DIFF	Significant differentially regulated genes resulting from the microarray analysis using cafestol fed E3L mice (Table S1; Pubmed:17456796)
LIT_MM_SHEN_EZH2ESCELL_H3K27ME3-TARGET_DN	B_ChIP-chip signal comparison of common H3K27me3 target genes in wild-type and Ezh2-/- mutant ES cells. (Table S7; Pubmed:19026780)
MIRNA_MM_BETEL_MMU-MIR-300	BETEL_MMU-MIR-300; Good mirSVR score Non-conserved; The microRNA.org resource: targets and expression.
STITCH_MM_GALACTOSE-CID100000206	galactose(CID100000206) from STITCH (Search Tool for Interactions of Chemicals), data from GeneSetDB.
LIT_MM_TIMMONS_WHITE-PREADIPOCYTE_7D_4D_UP	WAT_7dvs4d_WAT and BAT up overlap (Dataset S3; Pubmed:17360536)
LIT_MM_ANGUS-HILL_COLON_TCF4HET-APCMIN_TCF4APCMIN_MICROARRAY_UP	UP_Expression microarray analysis of RNA isolated from the colons of Tcf4WTApcMin and Tcf4Het ApcMin littermates (Dataset S2; Pubmed:21383188)
LIT_MM_GEBEL_CS-EXPOSURE_KO-2M_DN	DN ko 2 m,the strong impact of CS(Cigarette Smoke) exposure on the transcriptome of rodent lung tissue cells (Table S1; Pubmed:20133372)
MIRNA_MM_GRIMSON_MIR-25_32_92ABC_363_363-3P_367	GRIMSON_MIR-25_32_92ABC_363_363-3P_367; Predicted_Targets_Info; MicroRNA Targeting Specificity in Mammals: Determinants beyond Seed Pairing.
MPO_MM_WEIGHT_LOSS	weight loss from MPO (Mammalian Phenotype Ontology), data from GeneSetDB.
MIRNA_MM_WANG_MMU-MIR-669N	WANG_MMU-MIR-669N; Prediction of both conserved and nonconserved microRNA targets in animals 2008.
METHYCANCER_MM_OVERVIEW_OF_LUNG_TUMORS	Overview of lung tumors from MethyCancer, data from GeneSetDB.
CTD_MM_FULVESTRANT	fulvestrant from CTD (Comparative Toxicogenomics Database), data from GeneSetDB.
MIRNA_MM_VERGOULIS_MMU-MIR-124-3P	VERGOULIS_MMU-MIR-124-3P; TarBase 6.0: capturing the exponential growth of miRNA targets with experimental support.
LIT_MM_TOMCZAK_MYOGENIC_2D_C2_DIFF	List of Affymetrix probe sets classified into Group II clusters. All fold change values are relative to day -2. (Table S2; Pubmed:14688207)
LIT_MM_PLASARI_10H-TGF-BETA1_UP	UP 10h TGF-?1 treated vs untreated TGF-?1 regulated genes, as deduced from mRNA profiling assays (Table S3; Pubmed:19752192)
LIT_MM_ULLOA-MONTOYA_ESC_MAPC_NIA_UP	Genes expressed in ESC at least 2 fold higher than MAPC in NIA microarray (Table S7; Pubmed:17683608)
LIT_MM_KAWAZU_C57BL_6_DN-THYMOCYTE-DEVELOP_C1_DN2_DN3_UP	a_Clustering of differentially expressed genes during DN thymocyte development (Table S1; Pubmed:17911620)
LIT_MM_GARINIS_DKO-CELL_IRRADIATED-UV_DN	down-List of significant expression profiles of DKO cells irradiated with 0.6J/m2 of UV (gray color) as compared to non-irradiated DKO cells (Table 5; Pubmed:19363488)
LIT_MM_LEE_ICI_UP	Genes increased upon ICI treatment (Table S1; Pubmed:20219888)
HPO_MM_ABNORMALITY_OF_RENAL_PHYSIOLOGY	Abnormality of renal physiology from HPO (Human Phenotype Ontology), data from GeneSetDB.
CTD_MM_DIETHYLSTILBESTROL	Diethylstilbestrol from CTD (Comparative Toxicogenomics Database), data from GeneSetDB.
MSIGDB_MM_ACEVEDO_FGFR1_TARGETS_IN_PROSTATE_CANCER_MODEL_DN	Genes down-regulated during prostate cancer progression in the JOCK1 model due to inducible activation of FGFR1 [GeneID=2260] gene in prostate.
LIT_MM_LIN_HAIR-CYCLE_TIME-COURSE_C3_1ST-HAIR-GROWTH-CYCLE_DIFF	1st-cluster3_Time-course profile clustering of hair-cycle regulated genes. (Table S1; Pubmed:19629164)
LIT_MM_TURK_SEVERELY-AFFECTED_VS_LMILDLY-OR-NON-AFFECTED_DN	down-List of genes differentially expressed between severely affected animal models (group I) and mildly or non-affected animal models (group II), including p-values and fold-changes (Table S3; Pubmed:16306063)
CTD_MM_LUCANTHONE	Lucanthone from CTD (Comparative Toxicogenomics Database), data from GeneSetDB.
LIT_MM_FAZZIO_ESC_P400-KD_UP	p400_UP_genes differentially expressed in both Tip60 and p400 knockdown(KD) ESCs (Table S4; Pubmed:18614019)
LIT_MM_LIADAKI_SIDE-POPULATION_MUSCLE_VS_BONE-MARROW_DN	down-SP M/BM Fold change (Table S7; Pubmed:15652349)
LIT_MM_AVIVI_HYPOXIA_OXYGEN_DIFF	hypoxia--significant differential expression in response to hypoxia, 380 changed across species, and 73 demonstrated an interactive effect of oxygen concentration by species--identifiable UniGene clusters for hypoxia, species, and interaction genes, respectively (Table S1; Pubmed:16788006)
LIT_MM_HIRATANI_K-MEANS-CLUSTERS-OF-REPLICATION-TIMING_CLUSTER-4_DIFF	cluster-4 Lists of RefSeq genes that reside within K means clusters of replication timing 1-20 as defined in Figures 6-7 and their mRNA expression data (Table S3; Pubmed:19952138)
LIT_MM_LACAZE_CLUSTER1_24L_24C_MOCK_TRANSFECTION_DN	DN cluster1 24L vs. 24C Mock transfection gene expression clusters (Addi. file 1 ; Pubmed:19664281)
LIT_MM_SIMMEN_JEJUNUM_KLF9-KNOCKOUT_UP	down-Jejunum transcripts down-regulated (1.3 fold cutoff) in Klf9 knockout mice. (Table S1; Pubmed:17379758)
L2L_MM_PUBERTAL_MAMMARY_3-4WKS_UP	Up-regulated > 1.5-fold in the developing mouse mammary gland between 3 and 4 weeks of age.
LIT_MM_ISGANAITIS_UC_UU_LBW_DN	SAM pairwise analysis: Genes Differentially Expressed in UC vs. UU (FDR < 25%) Genes differentially expressed in LBW mice with catch-up growth (U-C) vs. LBW mice without catch-up growth (U-U), with FDR < 25% (Table S5b; Pubmed:19208909)
LIT_MM_GEBEL_CS-EXPOSURE_1D_DN	DN wt 1 d,the strong impact of CS(Cigarette Smoke) exposure on the transcriptome of rodent lung tissue cells (Table S1; Pubmed:20133372)
LIT_MM_HEIMAN_STRIATONIGRAL-CELL_UP	Top 1000 Striatonigral Cell Translated mRNAs Enriched When Compared to a Reference Sample (Table S22; Pubmed:?9013281)
STITCH_MM_HEPARIN-CID000008784	heparin(CID000008784) from STITCH (Search Tool for Interactions of Chemicals), data from GeneSetDB.
LIT_MM_ZHANG_SMA_KIDNEY_EXON-ARRAY_STEADY-STATE-TRANSCRIPT-LEVEL_DN	DN_kidney_Complete list of genes predicted to be affected at steady state transcript level in SMA mice spinal cord and kidney by exon array (Table S2; Pubmed:18485868)
LIT_MM_HEAZLEWOOD_INTESTINE_MUC2-MUTANT_DIFF	Relative Expression of Genes Altered in both Muc2 Mutant Mouse strain (Figure S1; Pubmed:18318598)
STITCH_MM_ESTRADIOL-CID100000450	estradiol(CID100000450) from STITCH (Search Tool for Interactions of Chemicals), data from GeneSetDB.
LIT_MM_TIMMONS_WHITE-PREADIPOCYTE_7D_4D_UNIQUE_UP	WAT_7dvs4d_unique_WAT and BAT up overlap (Dataset S3; Pubmed:17360536)
MIRNA_MM_BETEL_MMU-MIR-136_1	BETEL_MMU-MIR-136_1; Good mirSVR score Conserved; The microRNA.org resource: targets and expression.
LIT_MM_KENDRICK_3VIRGIN_MAMMARY_EPITHELIAL-SUBPOPULATION_DIFF	Relative expression levels of 2182 Affymetrix probes across three virgin mouse mammary epithelial subpopulations (Table S2; Pubmed:19063729)
LIT_MM_LACAZE_CLUSTER1_24R_24C_MOCK_TRANSFECTION_DN	DN cluster1 24R vs. 24C Mock transfection gene expression clusters (Addi. file 1 ; Pubmed:19664281)
MIRNA_MM_VERGOULIS_MMU-MIR-26A-5P	VERGOULIS_MMU-MIR-26A-5P; TarBase 6.0: capturing the exponential growth of miRNA targets with experimental support.
LIT_MM_ANDRES-AGUAYO_MSI2_LSK_DN	DN_Gene expression data for probes misregulated in Msi2-/- LSK cells (Table S4; Pubmed:21613258)
LIT_MM_LIEW_WHOLE_ARKO_OVARY_DIFF	Microarray analysis of whole genome expression in ArKO ovary compared to WT ovary identified 450 differentially expressed transcripts with a 62-fold expression difference that was significant (p,0.05 according to t-tests, n= 3)E-dependent DEG list (Table S2; Pubmed:21347412)
LIT_MM_LIN_HAIR-CYCLE_TIME-COURSE_C3_2ND-DEPILATION-INDUCED-HAIR-GROWTH-CYCLE_DIFF	2nd-cluster3_Time-course profile clustering of hair-cycle regulated genes. (Table S1; Pubmed:19629164)
LIT_MM_PORTER_DIAPHRAGM_VS_HINDLIMB-MUSCLE_DIFF	Transcripts differentially expressed in wild type diaphragm versus wild type hindlimb muscle (Table S2; Pubmed:14681298)
MSIGDB_MM_BOYLAN_MULTIPLE_MYELOMA_PCA1_UP	Top up-regulated genes from principal component 1 (PCA1) which captures variation between normal plasma cells and tumors arising from aberrant expression of BCL2L1 and MYC [GeneID=598;4609].
CTD_MM_ASBESTOS_AMPHIBOLE	Asbestos, Amphibole from CTD (Comparative Toxicogenomics Database), data from GeneSetDB.
LIT_MM_BREDEMEYER_RAG-DSBS_ATM-INDEPEND_DIFF	Genes that are significantly differentially regulated in response to Rag DSBs that are independent of Atm (Table S1; Pubmed:18849970)
LIT_MM_GARCIA-ORTIZ_TESTIS_DEVELOP-MARKER_PC1_DIFF	developmental marker gene that were significantly associated with PC1 of Figure 1. (Additional file 2B; Pubmed:19538736)
LIT_MM_GRESH_SNF5-INACTIVATION_UP	up-significantly increased upon SNF5 inactivation (p < 0.05 and fold change > 1.5) (Table S2; Pubmed:16138077)
L2L_MM_PUBERTAL_MAMMARY	Differentially expressed (> 2-fold) in the developing mouse mammary gland at any time point between 3- and 7-weeks of age.
LIT_MM_MAJEWSKI_SUZ12PLT8MPL-PLUS_ADULT-LSK_UP	UP Adult LSK Suz12Plt8/+ Mpl+/+ vs wild-type log-ratios,Fetal and adult LSK log-ratios (Table S4; Pubmed:20445021)
LIT_MM_REECE_SCID-MICE_DPI_UP	Upregulated Genes (>2x) in Both WT and SCID Mice by DPI (Table S2; Pubmed:16926388)
MIRNA_MM_WANG_MMU-MIR-3069-5P	WANG_MMU-MIR-3069-5P; Prediction of both conserved and nonconserved microRNA targets in animals 2008.
MIRNA_MM_WANG_MMU-MIR-5121	WANG_MMU-MIR-5121; Prediction of both conserved and nonconserved microRNA targets in animals 2008.
LIT_MM_ULLOA-MONTOYA_MAPC_MSC-ESC_UP	Genes expressed in MAPC at least two fold higher than MSC and ESC (Table S1; Pubmed:17683608)
LIT_MM_ZUBER_CIRCADIAN-TRANSCRIPTS_DCT_CNT_DIFF	Circadian transcripts in DCT/CNT (Table S6; Pubmed:19805330)
LIT_MM_MAHERALI_2D4IPS-CELL_ES_MEF_DIFF	Supporting Data for Expression Analysis of 2D4 iPS Cells (Table S5; Pubmed:18371336)
MSIGDB_MM_MEISSNER_NPC_HCP_WITH_H3K4ME2	Genes with high-CpG-density promoters (HCP) bearing histone H3 dimethylation mark at K4 (H3K4me2) in neural precursor cells (NPC).
CTD_MM_SULINDAC	Sulindac from CTD (Comparative Toxicogenomics Database), data from GeneSetDB.
TFACTS_MM_JUN	Target genes of transcription factor JUN, predicted by TFactS, data from GeneSetDB.
MIRNA_MM_WANG_MMU-MIR-5102	WANG_MMU-MIR-5102; Prediction of both conserved and nonconserved microRNA targets in animals 2008.
LIT_MM_KIM_ALB-CRE_VHL-F-F_ALB-CRE_LIVER_UP	Top 200 gene upregulated in Alb-Cre; VHL f/f livers relative to Alb-Cre control livers (Table S1; Pubmed:16977322)
MIRNA_MM_WANG_MMU-MIR-670-3P	WANG_MMU-MIR-670-3P; Prediction of both conserved and nonconserved microRNA targets in animals 2008.
SIDER_MM_METRORRHAGIA	Metrorrhagia from SIDER (SIDe Effect Resource), data from GeneSetDB.
INOH_MM_GPCR_SIGNALING-CHOLERA_TOXIN	GPCR signaling-cholera toxin from INOH (Integrating Network Objects with Hierarchies), data from GeneSetDB.
LIT_MM_LOFTUS_MELANOCYTE-LINE_NIH3T3-CONTROL_UP	Hierarchical clustering of 318 array elements (258 genes) which are >2-fold over expressed in all melanocyte lines relative to NIH3T3 control calibrated ratios and also have expression increased >3 fold in any one cell line relative to the Universal control RNA. (Figure S1; Pubmed:18983539)
SIDER_MM_SINUS_CONGESTION	Sinus congestion from SIDER (SIDe Effect Resource), data from GeneSetDB.
LIT_MM_XUE_NHE1_K-LINE-HEART_DN	DN List of differentially expressed genes in N- line hearts (Table S3; Pubmed:20460605)
STITCH_MM_POTASSIUM-CID000000813	potassium(CID000000813) from STITCH (Search Tool for Interactions of Chemicals), data from GeneSetDB.
INOH_MM_GPCR_SIGNALING-G_ALPHA_I	GPCR signaling-G alpha i from INOH (Integrating Network Objects with Hierarchies), data from GeneSetDB.
LIT_MM_LYU_BRAIN_E16.5-TOP2BETA-EMBRYOS_EMBRYOS_DIFF	differentially expressed (?1.7 fold, p-value ?0.01) in the brain of E16.5 top2??2/?2 embryos. (Table S3; Pubmed:16923961)
TF_MM_ZHAO_ETS1	Target genes of transcription factor ETS1, experimentally confirmed according to Transcriptional Regulatory Element Database (TRED).
INOH_MM_GPCR_SIGNALING-PERTUSSIS_TOXIN	GPCR signaling-pertussis toxin from INOH (Integrating Network Objects with Hierarchies), data from GeneSetDB.
LIT_MM_QUIGLEY_FVBBX_DMBA-TPA_20W_H-SUSCEPTIBILITY_L-SUSCEPTIBILITY_UP	UP_Genes differentially expressed between low-susceptibility mice (zero papillomas at 20 weeks) and high-susceptibility mice (eight or more papillomas at 20 weeks). (Table S8; Pubmed:19136944)
MSIGDB_MM_SWEET_LUNG_CANCER_KRAS_DN	Genes down-regulated in the Kras2LA mouse lung cancer model with mutated KRAS [GeneID=3845].
LIT_MM_LIN_E2A_UP	UP E2A and FOXO1 regulated genes (Table S4; Pubmed:20543837)
L2L_MM_POD1_KO_DN	Down-regulated in glomeruli isolated from Pod1 knockout mice, versus wild-type controls
LIT_MM_LIM_CONSERVED-GENE_MASC-ENRICHED-SUBSET_MAMMARY-CELL_UP	UP containing conserved genes in the MaSC-enriched subset. The table gives the 489 genes which are up-regulated and the 428 genes which are down-regulated in the MaSC-enriched subset in both species (Table S1; Pubmed:20346151)
STITCH_MM_CADMIUM-CID000002514	cadmium(CID000002514) from STITCH (Search Tool for Interactions of Chemicals), data from GeneSetDB.
LIT_MM_SOSHNIKOVA_PRX1CRE-CTCFFLOX-FLOX-FORELIMBS_GENECHIP_UP	up - regulated in Prx1Cre:Ctcfflox/flox forelimbs compared to wild type identified by GeneChip Mouse Genome 430 2.0 Arrays. (Table S2; Pubmed:21145498)
L2L_MM_RB_CREKO_UP	Up-regulated at 144 hours after disruption of Rb in adult mouse fibroblasts by Cre recombination, versus GFP controls.
LIT_MM_LANGLAIS_LIF_GC_CLUSTER9_DIFF	Cluster 9,List of gene annotations attributed by DAVID web site for each cluster (Table S3; Pubmed:18927629)
STITCH_MM_ESTRADIOL-CID000005757	estradiol(CID000005757) from STITCH (Search Tool for Interactions of Chemicals), data from GeneSetDB.
LIT_MM_ARENSBERGEN_H3K27ME3_PDX1_PANCREATIC-PROGENITOR_DIFF	Genes that are H3K27me3+ in Pdx1+ pancreatic progenitors. (Table S5; Pubmed:20395405)
LIT_MM_FERNANDEZ-VALDIVIA_MAMMARY-GLAND_PROGESTERONE_28H_UP	28h_UP_The complete list of mammary genes induced or repressed by progesterone during each of these time points (Table S2; Pubmed:18687774)
MIRNA_MM_GRIMSON_MIR-1843B-3P	GRIMSON_MIR-1843B-3P; Predicted_Targets_Info; MicroRNA Targeting Specificity in Mammals: Determinants beyond Seed Pairing.
LIT_MM_HANDLEY_MLN-MICE_INFECTION-Y.ENTEROCOLITICA_DIFF	regulated in the MLN of mice (n = 10, C57BL/6j) after oral infection with Y. enterocolitica (5 x 10E8 cfu) as determined by Affymetrix GeneChip MGU74Av2 (Table S4; Pubmed:16717182)
LIT_MM_GU_ENRICHED-PDX1-E10.5_DIFF	4b: list of genes enriched in PDX1?cells (E10.5) (Table S4; Pubmed:14660441)
SIDER_MM_SINUS_HEADACHE	Sinus headache from SIDER (SIDe Effect Resource), data from GeneSetDB.
LIT_MM_CHENG_4TIME-POINTS_PROGESTERONE-WITHDRAWAL_2-FOLD_DIFF	transcripts with generally higher levels (normalized expression levels above 2) but changed only more than two-fold between any two time-points. (Table S1; Pubmed:17251523)
MIRNA_MM_GRIMSON_MIR-1792	GRIMSON_MIR-1792; Predicted_Targets_Info; MicroRNA Targeting Specificity in Mammals: Determinants beyond Seed Pairing.
LIT_MM_LANGLAIS_LIF_GC_CLUSTER8_DIFF	Cluster 8,List of gene annotations attributed by DAVID web site for each cluster (Table S3; Pubmed:18927629)
LIT_MM_PAXSON_PNY_SHAM_LUNG_DIFF	Transcripts with significant (P < 0.001) differential expression (PNY vs SHAM) during lung regeneration (time-independent analysis) (Table S1 ; Pubmed:19804646)
LIT_MM_NISHIYAMA_TF-ZSCAN4C_ES-CELL_DN	Zscan4c Genes up-regulated or down-regulated >=2 fold in response to manipulation of transcription factors (Table S3; Pubmed:19796622)
MPO_MM_CARDIAC_FIBROSIS	cardiac fibrosis from MPO (Mammalian Phenotype Ontology), data from GeneSetDB.
LIT_MM_WENTZ_4W-KETOGENIC-DIET_STANDARD-CHOW_MYOCARDIAL_DN	DN Myocardial genes changed by maintenance for four weeks on a ketogenic diet, compared to standard chow (Table S2; Pubmed:20529848)
SIDER_MM_REACTION_GASTROINTESTINAL	Reaction gastrointestinal from SIDER (SIDe Effect Resource), data from GeneSetDB.
MSIGDB_MM_PILON_KLF1_TARGETS_UP	Genes up-regulated in erythroid progenitor cells from fetal livers of E13.5 embryos with KLF1 [GeneID=10661] knockout compared to those from the wild type embryos.
LIT_MM_SHEN_ESCELL_DIFFERENTIATION_6D_UP	Up-regulated genes in wild-type ES cells at day 6 of differentiation (Table S9; Pubmed:19026780)
INOH_MM_GPCR_SIGNALING-G_ALPHA_S_EPAC_AND_ERK	GPCR signaling-G alpha s Epac and ERK from INOH (Integrating Network Objects with Hierarchies), data from GeneSetDB.
LIT_MM_PORTER_MDX_VS_DIAPHRAGMA_DIFF	Transcripts differentially expressed in mdx versus wild type diaphragma (Table S1; Pubmed:14681298)
INOH_MM_GPCR_SIGNALING-G_ALPHA_Q	GPCR signaling-G alpha q from INOH (Integrating Network Objects with Hierarchies), data from GeneSetDB.
LIT_MM_LEMBERGER_CREB_CREM-MUTANT_STRIATUM_DIFF	Transcripts with significantly different abundance in the striatum of mutant vs control mice. (Table S3; Pubmed:18424767)
LIT_MM_SRIDHARAN_BINDINGBINDING_PARTIALLY-REPROGRAMMED-CELL_ES-CELL_UP	UP +Binding/-Binding and expression data from Figure 2B in the order presented in the figure,Differential Binding between Partially Reprogrammed Cells and ES Cells Correlates with Expression Differences (Table S6; Pubmed:19167336)
LIT_MM_VALOR_VP16-CREBHIGH_HIPPOCAMPUS_DIFF	Significantly altered probe-sets in the hippocampus of VP16-CREBhigh mice 3 weeks after transgene induction (Table S2; Pubmed:20395962)
GO_BP_MM_CELL_ADHESION	GO:0007155 ; GO Term Name: cell adhesion ; GO domain: biological_process ; GO Evidence Code: IEA
MSIGDB_MM_MARKEY_RB1_ACUTE_LOF_DN	Genes down-regulated in adult fibroblasts with inactivated RB1 [GeneID=5925] by Cre-lox: acute loss of function (LOF) of RB1.
LIT_MM_MITCHELL_P38_HEART_UP	up-p38 COMPARE_RESULT--transgenic vs.control hearts. (Table S2; Pubmed:16368875)
LIT_MM_IVANOVA_RA-DIFFERENTIATION-TIME-COURSE_DN	down-regulated in RA differentiation time-course (Table S7; Pubmed:16767105)
LIT_MM_WEBER_TCF1-THY1-CD25_VS_LMPP_DN	DN_Genes greater than 2 fold in Tcf1-expressing Thy1+CD25+ cells compared to LMPP (Table S3; Pubmed:21814277)
LIT_MM_GARCIA-ORTIZ_FETAL-OVARY_WNT4-NULL_UP	Up in Wnt4-null (Additional file 8D; Pubmed:19538736)
LIT_MM_GIANNAKIS_CHAG_MGEP_DN	DN (B)ChAG,mGEP genes differentially expressed after infection by strains obtained from hosts with normal gastric histology (A), ChAG (B), or adenocarcinoma (C),compared to uninfected cells (Table S3B; Pubmed:19723631)
LIT_MM_GARINIS_XPA-CELL_IRRADIATED-UV_DN	down-List of significant expression profiles of XPA cells irradiated with 0.6J/m2 of UV (gray color) as compared to non-irradiated XPA cotrols (Table 3; Pubmed:19363488)
LIT_MM_ZUBER_TET-OFF-MLL-AF9_RAS_DOX_6D_DN	Significantly downregulated genes following MLL-AF9 withdrawal (Table S1; Pubmed:21828272)
LIT_MM_GIANNAKIS_CHAG_CANCER_MGEP_DN	DN Shared hAG and cancer?signature mGEP response (Table S5; Pubmed:19723631)
LIT_MM_RALSTON_ESCELL_GATA3_NON-TROPHOBLAST_UP	B_Non-trophoblast genes induced by Cdx2 or Gata3 in ES cells (Table S4; Pubmed:20081188)
LIT_MM_SHAH_ADULT-COCHLEA_NEURONAL-TRANSMEMBRANE-RECEPTOR_DIFF	Meta-analysis of neuronal transmembrane receptors in our study (GSE12810) and two previous studies by Someya and colleagues (GSE4786 & GSE4866) to estimate absolute expression levels in adult cochlea (Table S1; Pubmed:19716861)
LIT_MM_STILLWELL_4M_MDX_MDX_PECTORALIS-MUSCLE_UP	UP_Comparison of gene expression profiles between 4 month-old mdx/mdx (20% of chimerism) and WT pectoralis muscles (Table S5; Pubmed:19277212)
REACTOME_MM_ACTC1_PATHWAY	Genes that interact with the gene ACTC1, which was extracted from FIsInGene_Pathway_041709 in the REACTOME.
CTD_MM_TRANS-10-CIS-12-CONJUGATED_LINOLEIC_ACID	trans-10,cis-12-conjugated linoleic acid from CTD (Comparative Toxicogenomics Database), data from GeneSetDB.
LIT_MM_PANGAS_BR-SMAD-TUMOR_GRANULOSA_DN	171 Genes and ESTs significantly downregulated in BR-SMAD tumors (n=3) versus control granulosa cells (n=3) by microarray analysis (Table S1; Pubmed:17967875)
LIT_MM_GREBER_STARVED-H9HESC_RE-STIMULATION-FGF2_UP	up-Differential gene expression in starved H9 hESCs induced by re-stimulation with FGF2. (Table S4; Pubmed:17038665)
LIT_MM_RENTHAL_PCREB-TARGET-GENE_COCAINE_DIFF	Phospho-CREB target genes in chronic cocaine-treated mice (Table S9; Pubmed:19447090)
STITCH_MM_BUTYRATE-CID100000264	butyrate(CID100000264) from STITCH (Search Tool for Interactions of Chemicals), data from GeneSetDB.
MIRNA_MM_KREK_MMU-MIR-450A-5P	KREK_MMU-MIR-450A-5P; Center for Comparative Functional Genomics; Department of Biology, New York University.
MSIGDB_MM_MARTORIATI_MDM4_TARGETS_NEUROEPITHELIUM_UP	Genes up-regulated in apoptotic tissues (neuroepithelium) after MDM4 [GeneID=4194] knockout.
LIT_MM_LINDSLEY_D6_DKK-PLUS_VS_DKK_DN	down-d6_Dkk+/d3_Dkk- (Table S1; Pubmed:18593559)
LIT_MM_KLEIN_BREAST-CANCER_VS_MAMMARY-GLAND_DN	under-Differential gene expression between normal mammary gland and breast cancer of mice (Table S2; Pubmed:17410534)
GENESIGDB_MM_ROMITO_10_EMBRYONIC_STEM_CELL	Mouse EmbryonicStemCell_Romito10_276genes; 20140255-TableS2; data from GeneSigDB: http://compbio.dfci.harvard.edu/genesigdb/download/ALL_SIGSv4.gmt.
LIT_MM_HOLLOWAY_LIVER_HNF4ALPHA-KO_MALE-SPECIFIC_SEX-INDEPEND_DIFF	1454 sex-independent genes that are up or down-regulated in HNF4?-deficient male but not female and are not sex-specific in the HNF4?-KO strain (TFS groups 8A and 8B) (Table S5; Pubmed:18276827)
MIRNA_MM_WANG_MMU-LET-7G-3P	WANG_MMU-LET-7G-3P; Prediction of both conserved and nonconserved microRNA targets in animals 2008.
LIT_MM_WANG_NIH3T3_PP242_RAPAMYCIN_DN	DN_Differential gene expression induced by PP242 in NIH3T3 cells (Table S1; Pubmed:21876130)
LIT_MM_BANACH-PETROSKY_NKX3.1-PTEN_NORMAL_AI_VS_NORMAL_LOW-T_DN	the Low-T mutants displayed a gene expression profile that was strikingly similar to that found in androgen independent tumors from Nkx3.1; Pten mutant mice (Table S1; Pubmed:17909013)
GO_BP_MM_PROTEOLYSIS	GO:0006508 ; GO Term Name: proteolysis ; GO domain: biological_process ; GO Evidence Code: IEA
GO_CC_MM_PROTEIN_COMPLEX	GO:0043234 ; GO Term Name: protein complex ; GO domain: cellular_component ; GO Evidence Code: IEA
MSIGDB_MM_CUI_TCF21_TARGETS_2_DN	All significantly down-regulated genes in kidney glomeruli isolated from TCF21 [Gene ID=6943] knockout mice.
LIT_MM_SOHN_TGF-BETA1_SCLEROTOME-CELL_UP	UP TGF-? regulated genes. List of all genes regulated in sclerotome cells after 8 hours of treatment with 5 ng/ml TGF-?1 (Addi.file 4 ; Pubmed:20214815)
LIT_MM_LIANG_KDM2B_PLURIPOTENT-STEM-CELL_EARLY_UP	total up--Kdm2b promotes induced pluripotent stem cell generation by facilitating gene activation early in reprogramming (Table S1; Pubmed:22522173)
LIT_MM_NISHIYAMA_TF-NRIP1_ES-CELL_UP	Nrip1 Genes up-regulated or down-regulated >=2 fold in response to manipulation of transcription factors (Table S3; Pubmed:19796622)
LIT_MM_ABRANCHES_NNPS_EMBRYONIC-STEM-CELL_NEUROGENESIS_DIFF	Worksheet nNPs: list of 1171 probe sets (763 genes) that belong to the nNPs expression group.. --Neural Differentiation of Embryonic Stem Cells In Vitro: A Road Map to Neurogenesis in the Embryo (Table S1; Pubmed:19621087)
LIT_MM_HACKL_EST_3T3-L1-CELL_FAT-CELL-DEVELOPMENT_DIFF	An Excel file containing expression values for the 780 selected ESTs--3T3-L1 cells (pre-adipocyte cells) were monitored during differentiation--during fat cell development. (File S3; Pubmed:16420668)
LIT_MM_DIVINA_GERMINAL-CELL_DN	down-List of 924 genes with predominant expression in germinal cells (Table S3; Pubmed:15748293)
LIT_MM_GEBEL_CS-EXPOSURE_KO-5M-13D-PE_UP	UP ko 5 m + 13 d pe,the strong impact of CS(Cigarette Smoke) exposure on the transcriptome of rodent lung tissue cells (Table S1; Pubmed:20133372)
LIT_MM_KAMILERI_XPD-TTD_LIVER_DN	down-Signficant gene expression profiles in Xpd TTD livers as compared to wt littermate controls (Table S6; Pubmed:22323595)
MIRNA_MM_WANG_MMU-MIR-19A-5P	WANG_MMU-MIR-19A-5P; Prediction of both conserved and nonconserved microRNA targets in animals 2008.
REACTOME_MM_ACTG1_PATHWAY	Genes that interact with the gene ACTG1, which was extracted from FIsInGene_Pathway_041709 in the REACTOME.
LIT_MM_MENDOZA-VILLANUEVA_K14E6-TRANSGENIC_SKIN_DN	skin_DN_List of genes with a significant altered gene expression in skin and cervix from K14E6 transgenic mice (Additional file1-Table S1; Pubmed:19036130)
LIT_MM_HACKL_3T3-L1-CELL_FAT-CELL-DEVELOPMENT_DIFF	A table including expression levels from the present study and GeneAtlas----3T3-L1 cells (pre-adipocyte cells) were monitored during differentiation--during fat cell development. (File S12; Pubmed:16420668)
CTD_MM_ETHINYL_ESTRADIOL	Ethinyl Estradiol from CTD (Comparative Toxicogenomics Database), data from GeneSetDB.
STITCH_MM_CHOLESTEROL-CID000005997	cholesterol(CID000005997) from STITCH (Search Tool for Interactions of Chemicals), data from GeneSetDB.
LIT_MM_PUSCHENDORF_EXHIBITING_MILRINONE-TREATMENT_DN	down-Probe sets exhibiting >2-fold-change upon milrinone treatment. (Table S1; Pubmed:16815300)
LIT_MM_WRIGHT_PROXIMAL-TUBULE_CLCN5-KO_DN	DN_Proximal tubule Clcn5 knockout (Table S2; Pubmed:18349385)
LIT_MM_TIMMONS_BROWN-PREADIPOCYTE_7D_4D_UP	BAT_7dvs4d_WAT and BAT up overlap (Dataset S3; Pubmed:17360536)
LIT_MM_GARCIA-ORTIZ_FETAL-OVARY_NEWBORN-OVARY_FOXL2_FOXL2_DN	Genes that go down in all fetal and newborn ovaries that lack Foxl2 (Additional file 4C; Pubmed:19538736)
LIT_MM_MOTOYAMA_LIVER_ISOLATION-STRESS_30D_DN	218 down-regulated genes in the mice liver of isolation stress for 30 days (Table S2; Pubmed:19106182)
LIT_MM_SNYDER_NAPHTHALENEINDUCED-INJURY-REPAIR-GENE_NODE89_UP	Productive repair gene signature (Node 89)RNA from control (0) and 1, 2, 3, or 6 days after naphthaleneinduced injury was isolated from whole lung homogenate and used for microarray analysis (Table SE1; Pubmed:18978301)
MSIGDB_MM_KUMAR_TARGETS_OF_MLL_AF9_FUSION	Myeloid leukemia model in mice with germ-line MLL-AF9 fusion knock-in [GeneID=4297;4300]: genes changed in comparison among the leukemic, preleukemic and wild-type animals.
LIT_MM_GARCIA-ORTIZ_NEWBORN-OVARY_NOBOX-NULL_UP	Genes that go up in Nobox-null newborn ovaries compared to wild-type newborn ovaries. (Additional file 6H; Pubmed:19538736)
LIT_MM_PUSCHENDORF_EXHIBITING_MILRINONE-TREATMENT_ANOVA_DN	down-Probe sets exhibiting >2-fold-change upon milrinone treatment ANOVA. (Table S1; Pubmed:16815300)
STITCH_MM_CADMIUM-CID100002514	cadmium(CID100002514) from STITCH (Search Tool for Interactions of Chemicals), data from GeneSetDB.
INOH_MM_GPCR_SIGNALING-G_ALPHA_S_PKA_AND_ERK	GPCR signaling-G alpha s PKA and ERK from INOH (Integrating Network Objects with Hierarchies), data from GeneSetDB.
LIT_MM_BACAC_STROMA-PIN-10W_VS_PROSTATE-CANCER-24W-CR2-TAG_UP	up-differentially expressed clones between stroma microdissected from PIN (10-weeks old) and invasive-prostate cancers (24-weeks old) of CR2-TAg mice (FDR 15%). (Table S1; Pubmed:17183660)
LIT_MM_PANTOJA_DEX_PREADIPOCYTE_DIFF	Log2 fold values of dex-regulated genes (Table S1; Pubmed:18653467)
LIT_MM_PINENT_ATGL_LIV_UP	up-ATGL-LIV (Table S1; Pubmed:18572100)
GENESIGDB_MM_STEIN_09_BREAST_1	Mouse Breast_Stein09_1780genes; 19408105-SuppTable4; data from GeneSigDB: http://compbio.dfci.harvard.edu/genesigdb/download/ALL_SIGSv4.gmt.
LIT_MM_GEBEL_CS-EXPOSURE-MED_5M_DN	DN wt, med,expression data from Nrf 2 -/- and wt mice exposed for 5 months to all three doses (low, medium, and high, see above) were analyzed,RNA samples prepared from lungs of sham-exposed nrf 2 ko and wt mice or mice exposed to CS (1500 lg [low], 2250 lg [medium], or 3000 lg[high] TPM/l per day, 5 days/week) for 5 months were analyzed (Table S2; Pubmed:20133372)
MIRNA_MM_GRIMSON_MIR-3124-5P	GRIMSON_MIR-3124-5P; Predicted_Targets_Info; MicroRNA Targeting Specificity in Mammals: Determinants beyond Seed Pairing.
LIT_MM_BORJABAD_HIV-1_ASTROCYTES_DN	DN Partial list of cellular significantly changed genes in mouse primary astrocytes exposed to HIV-1 (Table 2; Pubmed:19697136)
LIT_MM_CIMETTA_PROLIFERATIVE-MEDIUM_CELL-GROWN_DIFF	differentially expressed genes in cells grown in proliferative medium compared to those grown in differentiative medium (Table S2; Pubmed:19882696)
MIRNA_MM_WANG_MMU-LET-7C-1-3P	WANG_MMU-LET-7C-1-3P; Prediction of both conserved and nonconserved microRNA targets in animals 2008.
MPO_MM_PALLOR	pallor from MPO (Mammalian Phenotype Ontology), data from GeneSetDB.
LIT_MM_DEL-TORO_EC-DLL4_RETINAS_UP	up-regulated in EC of dll4+/- compared to wild type retinas (Table S1; Pubmed:20705756)
LIT_MM_LINDSLEY_D6_NT-PLUS_VS_NT_DN	down-d6_NT+/d3_NT- (Table S1; Pubmed:18593559)
LIT_MM_ZABUAWALA_MAMMARY-GLAND_ETS2-DEFICIENT_TUMOR_MACROPHAGE_DIFF	Expression Data from Ets2-deficient tumor associated macrophages (Table S1B; Pubmed:20145133)
LIT_MM_HE_SOX17-CD48-LSK_BM-CD48-LS_UP	upregulated in Sox17 CD48+LSK (Table S3; Pubmed:21828271)
LIT_MM_HALDAR_SYT-SSX_UP	SYT-SSX UPregulated genes (Table S5; Pubmed:17418413)
LIT_MM_TIMMONS_BROWN-PREADIPOCYTE_7D_4D_UNIQUE_UP	BAT_7dvs4d_unique_WAT and BAT up overlap (Dataset S3; Pubmed:17360536)
LIT_MM_BLOMBERG_ANTI-CD3-C_ANTI-CD3_CD28-C_CD3-T-CELL_DN	DN_3713 probe-set overlapping upon anti-CD3- and anti-CD3/CD28-stimulations in Wt CD3? T-cells (Additional file 5; Pubmed:19450280)
LIT_MM_NISHIYAMA_TF-CDX2_ES-CELL_UP	Cdx2 Genes up-regulated or down-regulated >=2 fold in response to manipulation of transcription factors (Table S3; Pubmed:19796622)
MSIGDB_MM_PANGAS_TUMOR_SUPPRESSION_BY_SMAD1_AND_SMAD5_DN	Genes down-regulated in ovarian tumors from mouse models for the BMP SMAD signaling (gonad specific double knockout of SMAD1 and SMAD5 [GeneID=4086, 4090]).
LIT_MM_GARCIA-ORTIZ_FETAL-OVARY_FOXL2-NULL_WNT4-NULL_UP	Genes up in Foxl2-null and up in Wnt4-null ovaries relative to fetal wildtype ovaries (Additional file 7A; Pubmed:19538736)
SIDER_MM_CONJUNCTIVAL_HAEMORRHAGE	Conjunctival haemorrhage from SIDER (SIDe Effect Resource), data from GeneSetDB.
LIT_MM_LEE_C4_GD-MODEL_DOPAMINERGIC-NEURON_ESC_DIFF	Cluser 4-Genes and clusters in K-means clustering analysis-- gene expressions of the guided differentiation (GD) model for dopaminergic (DA) neurons from mouse ESCs (Table SB; Pubmed:16627687)
MIRNA_MM_WANG_MMU-MIR-1929-3P	WANG_MMU-MIR-1929-3P; Prediction of both conserved and nonconserved microRNA targets in animals 2008.
MIRNA_MM_VERGOULIS_MMU-MIR-425-5P	VERGOULIS_MMU-MIR-425-5P; TarBase 6.0: capturing the exponential growth of miRNA targets with experimental support.
MIRNA_MM_WANG_MMU-MIR-30C-5P	WANG_MMU-MIR-30C-5P; Prediction of both conserved and nonconserved microRNA targets in animals 2008.
LIT_MM_TOISCHER_TAC_VS_SHAM_UP	Upregulated in TAC vs. Sham (Table S1; Pubmed:20733099)
LIT_MM_MARIAPPAN_CD31_8D_OLD-EBS_UP	upregulated CD31+ cells). Probe sets are listed with the corresponding gene symbol and gene accession number. Fold change (Fc) are given for pairwise comparisons between undifferentiated ES cells and CD31+ cells, 8 days old EBs and CD31+ cells as well as between undifferentiated ES cells and 8 days old EBs. (Table S1; Pubmed:19170770)
LIT_MM_CHAMBERS_HSC_DIFF	HSC-genes uniquely expressed in a single cell type (Table S3; Pubmed:18371395)
MIRNA_MM_KREK_MMU-MIR-715	KREK_MMU-MIR-715; Center for Comparative Functional Genomics; Department of Biology, New York University.
LIT_MM_LANGLAIS_LIF_GC_CLUSTER7_DIFF	Cluster 7,List of gene annotations attributed by DAVID web site for each cluster (Table S3; Pubmed:18927629)
MIRNA_MM_WANG_MMU-MIR-9-5P	WANG_MMU-MIR-9-5P; Prediction of both conserved and nonconserved microRNA targets in animals 2008.
LIT_MM_LINDSLEY_D4_NT-PLUS_VS_NT_UP	up-d4_NT+/d3_NT- (Table S1; Pubmed:18593559)
LIT_MM_AIBA_ESCELL_PRIMITIVE-ECTODERM_NEURAL-LINEAGE_DIFF	A list of genes and their expression levels for primitive ectoderm/neural lineage. (Table S3; Pubmed:19112179)
LIT_MM_KIRSTETTER_LL-LIC_MAC1-CKIT-CELL_UP	up-differentially expressed (FDR = 0.01) between LL-LIC and control Mac1+cKit+ cells are listed in order of decreasing statistical significance. (Table S1; Pubmed:18394553)
LIT_MM_STEGMANN_MEDIUM-CRYPT_VS_LOW-VILLI_PRIMO-DATABASE_DN	Genes that are downregulated from a medium level of expression in the crypts to a low level of expression in the villi and that have promoters in the PRIMO database.The fold change column indicates the down-regulation from crypt to villus (Table S7; Pubmed:16868071)
MIRNA_MM_VERGOULIS_MMU-MIR-7B-5P	VERGOULIS_MMU-MIR-7B-5P; TarBase 6.0: capturing the exponential growth of miRNA targets with experimental support.
LIT_MM_KOMASHKO_MESCELL_DIFFERENTIATE-INTO-EBS_UP	up-regulated when mES cells differentiate into EBs_Transition RNAs (Table S4; Pubmed:18347325)
MIRNA_MM_BETEL_MMU-MIR-496	BETEL_MMU-MIR-496; Good mirSVR score Non-conserved; The microRNA.org resource: targets and expression.
LIT_MM_BRUNSKILL_DBGLOM_GLOMWT_ENDOTHELIAL-CELL_DN	DN [dbglom] vs [glomwt]Differentially expressed endothelial genes. 786 genes with most distinct expression patterns across all endothelial cell samples (Suppl. Data S1; Pubmed:20706631)
MIRNA_MM_BETEL_MMU-MIR-193_1	BETEL_MMU-MIR-193_1; Good mirSVR score Conserved; The microRNA.org resource: targets and expression.
LIT_MM_BRUNSKILL_15.5_MED_ENDOTHELIAL-CELL_DN	DN [15.5] vs [med]Differentially expressed endothelial genes. 786 genes with most distinct expression patterns across all endothelial cell samples (Suppl. Data S1; Pubmed:20706631)
LIT_MM_MAJKA_PMVEC_BMPR2DELX4_DIFF	Genes differentially expressed in pulmonary microvascular endothelial cells(PMVEC) expressing the Bmpr2delx4+ mutationn as compared to controls. (Table S1-sheet1(2); Pubmed:21696628)
GO_CC_MM_EXTRACELLULAR_SPACE	GO:0005615 ; GO Term Name: extracellular space ; GO domain: cellular_component ; GO Evidence Code: IEA
MIRNA_MM_GRIMSON_MIR-34AC_34BC-5P_449ABC_449C-5P	GRIMSON_MIR-34AC_34BC-5P_449ABC_449C-5P; Predicted_Targets_Info; MicroRNA Targeting Specificity in Mammals: Determinants beyond Seed Pairing.
LIT_MM_HARDMAN_C-C_MIF_WOUND-HEALING_DIFF	cluster C -Genes Regulated by MIF--Macrophage Migration Inhibitory Factor A Central Regulator of Wound Healing (Table S2; Pubmed:16314470)
LIT_MM_BRUNSKILL_15.5_DBGLOM_ENDOTHELIAL-CELL_UP	UP [15.5] vs [dbglom]Differentially expressed endothelial genes. 786 genes with most distinct expression patterns across all endothelial cell samples (Suppl. Data S1; Pubmed:20706631)
MIRNA_MM_BETEL_MMU-MIR-142-3P	BETEL_MMU-MIR-142-3P; Good mirSVR score Conserved; The microRNA.org resource: targets and expression.
MIRNA_MM_GRIMSON_MIR-200BC_429_548A	GRIMSON_MIR-200BC_429_548A; Predicted_Targets_Info; MicroRNA Targeting Specificity in Mammals: Determinants beyond Seed Pairing.
LIT_MM_FRANCO_IHH_MURINE-UTERUS_DN	Genes Decreased Upon Ablation of Ihh(Indian hedgehog) (Table S3; Pubmed:20056671)
STITCH_MM_DEXAMETHASONE-CID000005743	dexamethasone(CID000005743) from STITCH (Search Tool for Interactions of Chemicals), data from GeneSetDB.
GENESIGDB_MM_BUONOMO_11_VIRAL	Mouse Viral_Buonomo11_202genes; 21205295-TableS5; data from GeneSigDB: http://compbio.dfci.harvard.edu/genesigdb/download/ALL_SIGSv4.gmt.
MPO_MM_ABNORMAL_LIPID_HOMEOSTASIS	abnormal lipid homeostasis from MPO (Mammalian Phenotype Ontology), data from GeneSetDB.
CTD_MM_TETRADECANOYLPHORBOL_ACETATE	Tetradecanoylphorbol Acetate from CTD (Comparative Toxicogenomics Database), data from GeneSetDB.
CTD_MM_CYCLOPHOSPHAMIDE	Cyclophosphamide from CTD (Comparative Toxicogenomics Database), data from GeneSetDB.
LIT_MM_AIBA_EMBRYONIC-STEM-CELL_ADULT-NEURAL-STEM-PROGENITOR-CELL_UP	Genes contributing to PC1-positive-direction--Defining a Developmental Path to Neural Fate by Global Expression Profiling of Mouse Embryonic Stem Cells and Adult Neural Stem/Progenitor Cells (Table S2; Pubmed:16357342)
MSIGDB_MM_MARTORIATI_MDM4_TARGETS_NEUROEPITHELIUM_DN	Genes down-regulated in apoptotic tissues (neuroepithelium) after MDM4 [GeneID=4194] knockout.
LIT_MM_CAHOY_CULTURED-ASTROGLIA_IN-VIVO-ASTROCYTE_UP	Genes statistically enriched in cultured astroglia compared to in vivo astrocytes (Table S21; Pubmed:18171944)
GO_MF_MM_ENZYME_BINDING	GO:0019899 ; GO Term Name: enzyme binding ; GO domain: molecular_function ; GO Evidence Code: IEA
LIT_MM_NISHIYAMA_TF-OTX2_ES-CELL_UP	Otx2 Genes up-regulated or down-regulated >=2 fold in response to manipulation of transcription factors (Table S3; Pubmed:19796622)
LIT_MM_WHITE_NEUROG3-EGFP-PROGENITOR_VS_DESCENDENT_UP	up-Differential expression of Neurog3-EGFP progenitors vs. descendents, determined to be statistically significant using EDGE (P <= 0.05) (Table S2; Pubmed:18071024)
LIT_MM_WEST_CHRONIC_D8_PRIMARY_SECONDARY-EFFECTOR_UP	genes upregulated in primary versus secondary effectors at day 8 after chronic infection (Table S1; Pubmed:21856186)
LIT_MM_ISHIMATSU-TSUJI_CSA-TR-7D_HAIR_UP	UP Up- or down-regulated genes 7 days after the CsA-treatment (Table S3; Pubmed:20026683)
LIT_MM_BRUNSKILL_DBGLOM_MED_ENDOTHELIAL-CELL_DN	DN [dbglom] vs [med]Differentially expressed endothelial genes. 786 genes with most distinct expression patterns across all endothelial cell samples (Suppl. Data S1; Pubmed:20706631)
MIRNA_MM_BETEL_MMU-MIR-1982.2	BETEL_MMU-MIR-1982.2; Good mirSVR score Non-conserved; The microRNA.org resource: targets and expression.
SIDER_MM_INTRAOCULAR_PRESSURE_INCREASED	Intraocular pressure increased from SIDER (SIDe Effect Resource), data from GeneSetDB.
LIT_MM_RIVOLTA_COCHLEAR_HAIR_DAY9_UP	up-regulated more than 5-fold at either day 9 (Table S1; Pubmed:12097346)
STITCH_MM_HEPARIN-CID100008784	heparin(CID100008784) from STITCH (Search Tool for Interactions of Chemicals), data from GeneSetDB.
LIT_MM_HAND_EMBRYONIC-LIVER_MIR-30A-ASO_UP	UP_305 genes whose expression was perturbed in the miR-30a ASO-treated cells by greater than 10% (Table S2; Pubmed:19185580)
LIT_MM_LU_ESTROGEN-PROGESTERONE_VS_VEHICLE-TREATMENT_DIFF	diff-Genes regulated by estrogen (E) and progesterone (P). Fold change is shown for mean log2 expression of each treatment group relative to mean log2 expression in Vehicle treatment (V). (Table S3; Pubmed:18556351)
MIRNA_MM_WANG_MMU-MIR-1897-5P	WANG_MMU-MIR-1897-5P; Prediction of both conserved and nonconserved microRNA targets in animals 2008.
LIT_MM_THOMAS_R6_2300Q_HDACI-4B_CNS_DIFF	List of genes differentially expressed due to mutant htt protein and/or HDACi 4b treatment at p<0.005 for each brain region (Table S1; Pubmed:18829438)
LIT_MM_BISAILLON_HOXA9-PKNOX1_UP	Genes upregulated by at least two-fold compared to the parental Hoxa9 population--Hoxa9 + Pknox1 (Table S2; Pubmed:21900201)
LIT_MM_CHAMBERS_P53-M_VS_P53-HSC_UP	Up in p53+/m compared to p53+/- HSC (Table S3; Pubmed:17676974)
LIT_MM_CHAKRABORTY_E17.5-AV-VALVE_E12.5-AV-CUSHION_UP	UP_List of differentially expressed (>2 fold) genes in E17.5 AV valve versus E12.5 AV cushion. (Table S1; Pubmed:18612084)
STITCH_MM_FE-III-CID100023925	Fe(III)(CID100023925) from STITCH (Search Tool for Interactions of Chemicals), data from GeneSetDB.
LIT_MM_MITIKU_GASTRULATION_PERI-ORGANOGENEIS_CIV_DIFF	Cluster IV_Seven dominant clusters identified in gastrulation and peri-organogenesis timecourse (Table S4; Pubmed:18061570)
LIT_MM_OSBORNE_HSALR20B_MUSCLE_UP	UP HSALR20b,Transcripts dysregulated in transgenic line HSALR20b or HSALR41 (fold-change > 2.0, nominal P value < 0.001, and FDR <1% in line HSALR20b, line HSALR41, or both). P(t) indicates nominal P value for t test (Table S1; Pubmed:19223393)
MIRNA_MM_BETEL_MMU-MIR-190B	BETEL_MMU-MIR-190B; Good mirSVR score Conserved; The microRNA.org resource: targets and expression.
KEGG_MM_CELL_ADHESION_MOLECULES	Cell adhesion molecules (CAMs) http://www.genome.jp/kegg-bin/show_pathway?mmu04514
MSIGDB_MM_LE_EGR2_TARGETS_DN	Genes down-regulated in P14 nerves of transgenic mice having hypomorhic (reduced function) allele of EGR2 [GeneID=1959].
LIT_MM_ARENSBERGEN_H3K27ME3_FACS-BETA-CELLS_NO-MORE-3-TISSUE_DIFF	Genes with selective H3K27me3 enrichment in FACS purified ?-cells.--H3K27me3+ in ?-cells, but no more than 3 other differentiated tissues (of total 11) (Table S3; Pubmed:20395405)
MIRNA_MM_KREK_MMU-MIR-652	KREK_MMU-MIR-652; Center for Comparative Functional Genomics; Department of Biology, New York University.
MSIGDB_MM_NFE2L2.V2	Genes up-regulated in MEF cells (embryonic fibroblasts) with knockout of NFE2L2 [Gene ID=4780] gene.
MPO_MM_COMPLETE_PERINATAL_LETHALITY	complete perinatal lethality from MPO (Mammalian Phenotype Ontology), data from GeneSetDB.
MIRNA_MM_BETEL_MMU-MIR-1932	BETEL_MMU-MIR-1932; Good mirSVR score Conserved; The microRNA.org resource: targets and expression.
LIT_MM_LACAZE_SIRNAS-WITH-IFNGAMMA_DIFF	Genes differentially regulated by targeting siRNAs in presence of IFN? (842 genes) (Addi. file 6; Pubmed:19664281)
MIRNA_MM_GRIMSON_MIR-1634	GRIMSON_MIR-1634; Predicted_Targets_Info; MicroRNA Targeting Specificity in Mammals: Determinants beyond Seed Pairing.
LIT_MM_GILLICH_DAY4_LIF-STAT3_DN	genes down_day 4 in LIF-Stat3 (Table S3; Pubmed:22482507)
LIT_MM_LIANG_TG-HQK_MUSCLE_DOXYCYCLINE_14D_UP	Genes up-regulated in Tg(HQK) muscle following induction of PrP over-expression (Additional file 1; Pubmed:19400950)
STITCH_MM_CHOLESTEROL-CID100000304	cholesterol(CID100000304) from STITCH (Search Tool for Interactions of Chemicals), data from GeneSetDB.
LIT_MM_OJAIMI_ENOS_MALE_DN	Down regulated in eNOS -/- male mice (Table S1; Pubmed:15879487)
LIT_MM_BRUNSKILL_15.5_ENDO_ENDOTHELIAL-CELL_DN	DN [15.5] vs [endo]Differentially expressed endothelial genes. 786 genes with most distinct expression patterns across all endothelial cell samples (Suppl. Data S1; Pubmed:20706631)
STITCH_MM_LTC4-CID100003907	LTC4(CID100003907) from STITCH (Search Tool for Interactions of Chemicals), data from GeneSetDB.
MIRNA_MM_KREK_MMU-MIR-551B	KREK_MMU-MIR-551B; Center for Comparative Functional Genomics; Department of Biology, New York University.
MIRNA_MM_WANG_MMU-MIR-142-5P	WANG_MMU-MIR-142-5P; Prediction of both conserved and nonconserved microRNA targets in animals 2008.
LIT_MM_GU_ENRICHED-E7.5-ENDODERM_VS_MESODERM-ECTODERM_DIFF	3a: list of genes enriched in E7.5 endoderm versus mesoderm and ectoderm--Genes differentially expressed in the 3 germ layers of the e7.5 embryo (Table S3; Pubmed:14660441)
LIT_MM_HAMATANI_DORMANT_ACTIVATED-BLASTOCYST_DIFF	The entire list of 229 differentially expressed genes with P ?0.01 and false discovery rate (FDR) = 0.1 in dormant and activated blastocysts (Table S3; Pubmed:15232000)
MIRNA_MM_WANG_MMU-MIR-710	WANG_MMU-MIR-710; Prediction of both conserved and nonconserved microRNA targets in animals 2008.
MPO_MM_DECREASED_CELL_PROLIFERATION	decreased cell proliferation from MPO (Mammalian Phenotype Ontology), data from GeneSetDB.
NETPATH_MM_TGFBETA_RECEPTOR_SIGNALING_PATHWAY	TGFbeta Receptor Signaling Pathway from NetPath, data from GeneSetDB.
MIRNA_MM_WANG_MMU-MIR-1942	WANG_MMU-MIR-1942; Prediction of both conserved and nonconserved microRNA targets in animals 2008.
MIRNA_MM_BETEL_MMU-MIR-133A_1	BETEL_MMU-MIR-133A_1; Good mirSVR score Conserved; The microRNA.org resource: targets and expression.
LIT_MM_GENNET_ESC_DMRT5_UP	UP_transcription regulated by Dmrt5 (Dataset S1; Pubmed:21576465)
LIT_MM_BALBIR_AJ_VS_DBA_DN	DECREASE - AJ vs DBA (Summarized data S1; Pubmed:17098806)
LIT_MM_PINENT_ATGL_CM_UP	up-ATGL-CM (Table S1; Pubmed:18572100)
CTD_MM_PACLITAXEL	Paclitaxel from CTD (Comparative Toxicogenomics Database), data from GeneSetDB.
LIT_MM_MATOBA_INVERSE-BELL-PATTERN_ZHTC6-ZHBTC4-CELL_DIFF	A complete list of genes that show inverse bell-shaped expression patterns in the time course of ZHTc6 and ZHBTc4 cells (Table S3; Pubmed:17183653)
LIT_MM_TURK_HINDLIMB-MUSCLE_DYSTROPHIN-DEFICIENT_DIFF	Averaged expression and significance levels for 1735 genes differentially expressed at at least one time point--ranging from 1 to 20 weeks--Gene expression levels were determined in hindlimb muscle tissue from mdx and control mice at 9 time points,ranging from 1 to 20 weeks. (Table S1; Pubmed:16011810)
MIRNA_MM_WANG_MMU-MIR-3095-5P	WANG_MMU-MIR-3095-5P; Prediction of both conserved and nonconserved microRNA targets in animals 2008.
LIT_MM_WILDE_HF-FEEDING_3D_UP	UP_Significantly changed genes (fold change > 1.3 and a raw p-value < 0.05) after 3 days of HF-feeding (Table S1-Table1; Pubmed:18042831)
MIRNA_MM_WANG_MMU-MIR-22-3P	WANG_MMU-MIR-22-3P; Prediction of both conserved and nonconserved microRNA targets in animals 2008.
LIT_MM_SHI_HIF1ALPHA_TH17-CELL_UP	UP_581 probe sets with a difference greater than or equal to twofold and false discovery rate <0.05 in HIF1-a-deficient versus wild type comparison (Table S1; Pubmed:21708926)
STITCH_MM_GENISTEIN-CID005280961	genistein(CID005280961) from STITCH (Search Tool for Interactions of Chemicals), data from GeneSetDB.
LIT_MM_CHRISTOFOROU_ES-CARDIAC_NOVEL-CARDIAC_UP	up-Mouse ES cell-derived cardiac precursor cells are multipotent and facilitate identification of novel cardiac genes (Fig S4; Pubmed:18246200)
STITCH_MM_BUTYRATE-CID000000264	butyrate(CID000000264) from STITCH (Search Tool for Interactions of Chemicals), data from GeneSetDB.
REACTOME_MM_ACTB_PATHWAY	Genes that interact with the gene ACTB, which was extracted from FIsInGene_Pathway_041709 in the REACTOME.
LIT_MM_LINDSLEY_D3_NT-PLUS_VS_NT_DN	down-d3_NT+/d3_NT- (Table S1; Pubmed:18593559)
LIT_MM_MAIN_ES-CELL-MEDIUM_N2B27-MEDIUM_UP	UP Summary of the effects of changing from ES cell medium to N2B27 medium,A compilation of all genes regulated in the switch between ES cell medium and N2B27 medium (Figure S3A; Pubmed:20034489)
LIT_MM_HIRATANI_K-MEANS-CLUSTERS-OF-REPLICATION-TIMING_CLUSTER-10_DIFF	cluster-10 Lists of RefSeq genes that reside within K means clusters of replication timing 1-20 as defined in Figures 6-7 and their mRNA expression data (Table S3; Pubmed:19952138)
MIRNA_MM_WANG_MMU-MIR-383-3P	WANG_MMU-MIR-383-3P; Prediction of both conserved and nonconserved microRNA targets in animals 2008.
LIT_MM_GIANNAKIS_5-CHAG_NOT-NORMAL-GASTRIC-HISTOLOGY-OR-HEAT-KILLED-BACTERIA_MGEP_DN	DN ChAG-associated signature response of mGEP cells: 695 transcripts that are differentially expressed upon infection with all 5 ChAG strains but not with the strain associated with normal gastric histology, or with heat-killed bacteria (Table S4; Pubmed:19723631)
CTD_MM_MONOMETHYLARSONOUS_ACID	monomethylarsonous acid from CTD (Comparative Toxicogenomics Database), data from GeneSetDB.
MSIGDB_MM_WANG_TUMOR_INVASIVENESS_DN	Down-regulated genes in the subpopulation of invasive PyMT cells (breast cancer) compared to the general population of PyMT cells.
LIT_MM_OSBORNE_HSALR41_MUSCLE_UP	UP HSALR41,Transcripts dysregulated in transgenic line HSALR20b or HSALR41 (fold-change > 2.0, nominal P value < 0.001, and FDR <1% in line HSALR20b, line HSALR41, or both). P(t) indicates nominal P value for t test (Table S1; Pubmed:19223393)
LIT_MM_HARAM_TRAMP_NORMAL_UP	UP_List of top 5 the Ingenuity interaction networks generated by mapping the focus genes that were differentially expressed (LCB >2) in TRAMP mice (Table S2; Pubmed:18668517)
LIT_MM_MOHN_ES-TO-NP_H3K27ME3_LOSS_POLYCOMB-TARGET_DIFF	H3K27me3 loss from ES to NP (Table S1; Pubmed:18514006)
LIT_MM_GEBEL_CS-EXPOSURE_KO-1D_DN	DN ko 1 d,the strong impact of CS(Cigarette Smoke) exposure on the transcriptome of rodent lung tissue cells (Table S1; Pubmed:20133372)
LIT_MM_IVANGA_DHT_UTERINE_UP	up-DHT-regulated uterine genes (Table S1; Pubmed:18671277)
LIT_MM_WALKER_PCL2_DN	DN genes were deregulated as a result of Pcl2 knockdown (Table S2; Pubmed:20144788)
STITCH_MM_ROSIGLITAZONE-CID100077999	rosiglitazone(CID100077999) from STITCH (Search Tool for Interactions of Chemicals), data from GeneSetDB.
MSIGDB_MM_DURAND_STROMA_MAX_UP	Up-regulated genes discriminating stromal cells that can support hematopoietic stem cells from those that cannot.
LIT_MM_PORTER_SKELETAL-MUSCLE_MDX-DIAPHRAGM_MDX-HINDLIMB_DIFF	Transcripts differentially expressed in wild type skeletal muscle and in either mdx diaphragm or mdx hindlimb muscle (Table S3; Pubmed:14681298)
LIT_MM_MATTEOLI_SUBLETHAL-PYV_VS_LETHAL-YOPH_CB2_DIFF	cluster-B2_Comparison of sublethal pYV? infection versus lethal ?yopH infection (Additional file 2; Pubmed:18803824)
MSIGDB_MM_YAMAZAKI_TCEB3_TARGETS_UP	Genes up-regulated in embryonic stem cells from TCEB3 [GeneID=6924] knockout mice.
MIRNA_MM_WANG_MMU-MIR-17-3P	WANG_MMU-MIR-17-3P; Prediction of both conserved and nonconserved microRNA targets in animals 2008.
MIRNA_MM_GRIMSON_MIR-22_22-3P	GRIMSON_MIR-22_22-3P; Predicted_Targets_Info; MicroRNA Targeting Specificity in Mammals: Determinants beyond Seed Pairing.
LIT_MM_VON-SCHANTZ_CLN1_1MO_UP	Upregulated in Cln1 -/- 1mo (Table S1; Pubmed:18371231)
LIT_MM_GOLDRATH_ANTIGEN-DRIVEN_ACTIVATION-OT-I-CD8-T-CELL_UP	Genes induced during antigen-driven activation of OT-I CD8+ T cells (Table S1; Pubmed:15548615)
LIT_MM_ZUBER_MYB-SUPPRESSION_DN	Significantly downregulated genes following suppression of Myb (Table S1; Pubmed:21828272)
GENESIGDB_MM_HERZIG_05_STEM_CELL_KRONES	Mouse StemCell_KronesHerzig05_145enes; 15958557-TableS1; data from GeneSigDB: http://compbio.dfci.harvard.edu/genesigdb/download/ALL_SIGSv4.gmt.
MPO_MM_INCREASED_CIRCULATING_TRIGLYCERIDE_LEVEL	increased circulating triglyceride level from MPO (Mammalian Phenotype Ontology), data from GeneSetDB.
MIRNA_MM_GRIMSON_MIR-369-5P	GRIMSON_MIR-369-5P; Predicted_Targets_Info; MicroRNA Targeting Specificity in Mammals: Determinants beyond Seed Pairing.
MIRNA_MM_VERGOULIS_MMU-MIR-324-3P	VERGOULIS_MMU-MIR-324-3P; TarBase 6.0: capturing the exponential growth of miRNA targets with experimental support.
MIRNA_MM_GRIMSON_MIR-30ABCDEF_30ABE-5P_384-5P	GRIMSON_MIR-30ABCDEF_30ABE-5P_384-5P; Predicted_Targets_Info; MicroRNA Targeting Specificity in Mammals: Determinants beyond Seed Pairing.
LIT_MM_SCIUTO_MOLECULAR-FUNCTION_PHOSGENE-EXPOSURE_DIFF	Molecular functions most significantly affected by phosgene exposure (p<0.01). (Table S2; Pubmed:16300373)
LIT_MM_PINENT_ATGL_BAT_UP	up-ATGL-BAT (Table S1; Pubmed:18572100)
GO_CC_MM_DENDRITE	GO:0030425 ; GO Term Name: dendrite ; GO domain: cellular_component ; GO Evidence Code: IDA
LIT_MM_PAPAIOANNOU_MUTANT-TESTIS_P5_DN	Downregulated genes in mutant testis at P5 ( ? 2 fold change) (Table S3; Pubmed:19071104)
LIT_MM_SHAROV_EPOU5F1-SUPPRESS_TRAINING-GENE_UP	UP_set of training genes that responded to Pou5f1 suppression and control genes used for optimizing the score of potential functionality of binding sites (Additional file11-Table S7; Pubmed:18522731)
MIRNA_MM_WANG_MMU-LET-7A-2-3P	WANG_MMU-LET-7A-2-3P; Prediction of both conserved and nonconserved microRNA targets in animals 2008.
MIRNA_MM_WANG_MMU-MIR-3065-5P	WANG_MMU-MIR-3065-5P; Prediction of both conserved and nonconserved microRNA targets in animals 2008.
STITCH_MM_ROSIGLITAZONE-CID000077999	rosiglitazone(CID000077999) from STITCH (Search Tool for Interactions of Chemicals), data from GeneSetDB.
LIT_MM_ZHANG_UNDIVIDED-BU-0DIV_NON-BULGE_PD21_PD25_UP	Bulge signatures,462 genes up-regulated >2 fold in Undivided Bu (0div) cells relative to Non-Bulge cells at PD21 and PD25 (Table S2.1 ; Pubmed:19664980)
LIT_MM_RICHTER_HSC1_VS_HSC7_UP	up-regulated HSC1 vs HSC7 (Table S2; Pubmed:16600034)
MIRNA_MM_GRIMSON_MIR-194	GRIMSON_MIR-194; Predicted_Targets_Info; MicroRNA Targeting Specificity in Mammals: Determinants beyond Seed Pairing.
LIT_MM_HEIMAN_STRIATOPALLIDAL-CELL_UP	Top 1000 Striatopallidal Cell Translated mRNAs Enriched When Compared to a Reference Sample (Table S23; Pubmed:?9013281)
LIT_MM_DEROO_TGF_D2E-MAMMARY-GLAND_UP	up-TGF?-responsive genes also present in the d2E mammary gland dataset. (Table S4; Pubmed:19484750)
LIT_MM_LINDSLEY_D3_DKK-PLUS_VS_DKK_UP	up-d3_Dkk+/d3_Dkk- (Table S1; Pubmed:18593559)
MIRNA_MM_WANG_MMU-MIR-3103-5P	WANG_MMU-MIR-3103-5P; Prediction of both conserved and nonconserved microRNA targets in animals 2008.
LIT_MM_GEBEL_CS-EXPOSURE-LOW_5M_DN	DN wt, low,expression data from Nrf 2 -/- and wt mice exposed for 5 months to all three doses (low, medium, and high, see above) were analyzed,RNA samples prepared from lungs of sham-exposed nrf 2 ko and wt mice or mice exposed to CS (1500 lg [low], 2250 lg [medium], or 3000 lg[high] TPM/l per day, 5 days/week) for 5 months were analyzed (Table S2; Pubmed:20133372)
LIT_MM_ULLOA-MONTOYA_MAPC-MSC_ESC_UP	Genes expressed in MAPC and MSC at least two fold higher than ESC (Table S3; Pubmed:17683608)
LIT_MM_DEROO_TGF_D14E-MAMMARY-GLAND_UP	up-TGF?-responsive genes also present in the d14E mammary gland dataset. (Table S7; Pubmed:19484750)
MIRNA_MM_GRIMSON_MIR-148AB-3P_152	GRIMSON_MIR-148AB-3P_152; Predicted_Targets_Info; MicroRNA Targeting Specificity in Mammals: Determinants beyond Seed Pairing.
LIT_MM_HUTNICK_EMX1-CRE_DNMT1_P5-DORSAL-CORTEX_UP	The list of up-regulated genes in P5 dorsal cortex in Emx1-cre; Dnmt1 mutant mice (Table S1; Pubmed:19433415)
MIRNA_MM_WANG_MMU-MIR-5626-3P	WANG_MMU-MIR-5626-3P; Prediction of both conserved and nonconserved microRNA targets in animals 2008.
MIRNA_MM_GRIMSON_MIR-204_204B_211	GRIMSON_MIR-204_204B_211; Predicted_Targets_Info; MicroRNA Targeting Specificity in Mammals: Determinants beyond Seed Pairing.
LIT_MM_MAJEWSKI_SUZ12PLT8MPL-MINUS_ADULT-LSK_UP	UP Adult LSK Suz12Plt8/+ Mpl-/- vs wild-type log-ratios,Fetal and adult LSK log-ratios (Table S4; Pubmed:20445021)
LIT_MM_HASHIMI_UNIQUE-TARGETS-MIRNAS_MDDC_DN	DN Unique targets of increasing/decreasing miRNAs upon MDDC differentiation (Table S3; Pubmed:19398721)
LIT_MM_MOREY_LIVER_PACIFIC-CIGUATOXIN-1_1H-4H-24H_TREND_C1_DIFF	cluster1_Genes included in the trend set (Table S2; Pubmed:18353800)
LIT_MM_TAKEMOTO_GLO_VS_REST-KIDNEY_C1_UP	significantly upregulated (>2-fold) genes in each tissue category-1-log2(glo/rest_kidney) (Table S3; Pubmed:16498405)
STITCH_MM_URIDINE_DIPHOSPHATE-CID000006031	uridine diphosphate(CID000006031) from STITCH (Search Tool for Interactions of Chemicals), data from GeneSetDB.
LIT_MM_NISHIYAMA_PTF-TARGET_2-ES-CELL-LINE_DN	List of pTF-target genes that were down-regulated after TF induction in at least 2 ES cell lines (Figure S11; Pubmed:19796622)
LIT_MM_ZIMMER_C-IV_DEVELOPMENTAL-NEUROTOXICITY_DIFF	Cluster IV--Complete listing of the assignment of genes to the different clusters--Cluster analysis of expression kinetics, and bioinformatic identification of verrepresented gene ontologies revealed waves of regulation relevant for DNT testing--developmental neurotoxicity. (Fig.S3; Pubmed:20865013)
LIT_MM_GARCIA-ORTIZ_OVARY_DEVELOP-MARKER_PC2_DIFF	developmental marker gene that were significantly associated with PC2 of Figure 1. (Additional file 2C; Pubmed:19538736)
LIT_MM_YUAN_APOE_VS_C3H.APOE_CHOW-DIET_AORTIC-WALL_UP	UP Differentially expressed genes in the aortic wall of B6.apoE-/- and C3H.apoE-/- mice fed a chow diet (Table S1; Pubmed:19304945)
MPO_MM_INCREASED_SENSITIVITY_TO_XENOBIOTIC_INDUCED_MORBIDITY_MORTALITY	increased sensitivity to xenobiotic induced morbidity/mortality from MPO (Mammalian Phenotype Ontology), data from GeneSetDB.
LIT_MM_CRAWFORD_CONVENTIONALIZATION_MICROBIOTA-RESPONSIVE-MYOCARDIAL_HEART_DN	DN Genes included in the HeatMap shown in Fig. S7B,170 genes that were significantly up- or down-regulated in the heart after conventionalization,170 microbiota-responsive myocardial genes in untrained mice (Table S5; Pubmed:19549860)
SIDER_MM_ATAXIA	Ataxia from SIDER (SIDe Effect Resource), data from GeneSetDB.
GENESIGDB_MM_WRIGHT_08_BREAST	Mouse Breast_Wright08_416genes; 18394172-S4GeneList; data from GeneSigDB: http://compbio.dfci.harvard.edu/genesigdb/download/ALL_SIGSv4.gmt.
MIRNA_MM_WANG_MMU-MIR-504-3P	WANG_MMU-MIR-504-3P; Prediction of both conserved and nonconserved microRNA targets in animals 2008.
MIRNA_MM_WANG_MMU-MIR-93-3P	WANG_MMU-MIR-93-3P; Prediction of both conserved and nonconserved microRNA targets in animals 2008.
LIT_MM_LI_LIVER-DEVELOP_STAGE1-4_TFS-TARGET_DIFF	Transcription regulation networks across mouse liver development (Table S6; Pubmed:19015022)
LIT_MM_DEROO_TGF_D28E-MAMMARY-GLAND_UP	up-TGF?-responsive genes also present in the d28E mammary gland dataset. (Table S8; Pubmed:19484750)
MSIGDB_MM_CRX_DN.V1_UP	Genes up-regulated in retina cells from CRX [Gene ID=1406] knockout mice.
LIT_MM_SIEWE_PERIOSTIN-SIRNA_OP9-CELL_DN	Genes down-regulated in periostin-siRNA OP9 cells (Table S1; Pubmed:21285437)
LIT_MM_ROLLETSCHEK_5FOLD_PAX4-ES-0D_VS_COMMITTEDPROGENITOR-CELL_5-16D_UP	five- or more-fold up-regulated in wt and Pax4+ cells (FC: fold change)--Pax4+ ES cells (0d) vs. committed progenitor cells at 5+16d (Table S2; Pubmed:19876843)
LIT_MM_SCHADT_LIVER_BXD-CROSS_DIFF	Liver gene expression traits significantly correlated with omental fat pad mass in the BXD cross. (Table S1; Pubmed:15965475)
LIT_MM_PINENT_ATGL_BAT_DN	down-ATGL-BAT (Table S1; Pubmed:18572100)
LIT_MM_WU_OSTEOSARCOMA_MYC-INACTIVATION_RI_UP	genes reversibly induced (RI) upon MYC inactivation. (Table S2; Pubmed:18535662)
GO_BP_MM_POSITIVE_REGULATION_OF_CELL_PROLIFERATION	GO:0008284 ; GO Term Name: positive regulation of cell proliferation ; GO domain: biological_process ; GO Evidence Code: IEA
MIRNA_MM_BETEL_MMU-MIR-434-3P	BETEL_MMU-MIR-434-3P; Good mirSVR score Non-conserved; The microRNA.org resource: targets and expression.
GO_CC_MM_PERINUCLEAR_REGION_OF_CYTOPLASM	GO:0048471 ; GO Term Name: perinuclear region of cytoplasm ; GO domain: cellular_component ; GO Evidence Code: IEA
LIT_MM_SOLIERA_4HT_32D-BCR_ABL-CELL_177-191-C_EBPALPHA_VS_MIGRI-TRANSDUCED-K298E-C_EBPALPHA-ER_UP	UP_C/EBP?-regulated genes identified by nucleotide array (Table S1; Pubmed:18550858)
LIT_MM_SCHAEFER_CAMK2A-CRE_GLPFL_FL_CORTEX_UP	List of 457 genes that change expression >1.5 fold in the cortex of Camk2a-Cre; GLPfl/fl mice as compared to controls (Table S5; Pubmed:20005824)
LIT_MM_SAJAN_EML-PATHWAY_EARLY-MIDDLE_DIFF	Early and Middle_EML pathways (Table S6; Pubmed:17660535)
LIT_MM_TVRDIK_R4-E10.5_HOXB1A1_VS_A1-EMBRYO_UP	Up-regulated genes in r4 of E10.5 Hoxb1A1(g)/A1(g) embryos (Table S3; Pubmed:16890163)
LIT_MM_LIN_HAIR-CYCLE_TIME-COURSE_C5_2ND-DEPILATION-INDUCED-HAIR-GROWTH-CYCLE_DIFF	2nd-cluster5_Time-course profile clustering of hair-cycle regulated genes. (Table S1; Pubmed:19629164)
MIRNA_MM_GRIMSON_MIR-340-5P	GRIMSON_MIR-340-5P; Predicted_Targets_Info; MicroRNA Targeting Specificity in Mammals: Determinants beyond Seed Pairing.
TFACTS_MM_GLI2	Target genes of transcription factor GLI2, predicted by TFactS, data from GeneSetDB.
LIT_MM_FRERICKS_TCDD_CD4-CD8-DENDRITIC-CELL_DN	DN Venn diagram of gene expression changes by TCDD in CD4, CD8 and dendritic cells (Figure 2; Pubmed:16972790)
MSIGDB_MM_LANDIS_ERBB2_BREAST_TUMORS_324_UP	Up-regulated genes from the 324 genes identified by two analytical methods as changed in the mammary tumors induced by transgenic expression of ERBB2 [GeneID=2064].
LIT_MM_KIM_ALB-CRE_HIF1DPA_VS_ALB-CRE_LIVER_UP	Top 200 gene upregulated in Alb-Cre; HIF1dPA livers relative to Alb-Cre control livers (Table S1; Pubmed:16977322)
GO_BP_MM_REGULATION_OF_CELL_PROLIFERATION	GO:0042127 ; GO Term Name: regulation of cell proliferation ; GO domain: biological_process ; GO Evidence Code: IMP
LIT_MM_GIANNAKIS_CANCER-ASSOCIATED-KX2-ISOLATE_24H_MGEP-TRANSCRIPT_UP	UP_Differentially expressed mGEP transcripts after a 24h infection with the cancer-associated Kx2 isolate (Table S7; Pubmed:18332421)
STITCH_MM_ESTROGEN-CID000448537	estrogen(CID000448537) from STITCH (Search Tool for Interactions of Chemicals), data from GeneSetDB.
LIT_MM_KURAGUCHI_TUMORS_MOLECULES-GENERATED-BY-IPA_DIFF	Molecules used in networks generated by Ingenuity Pathway Analysis (Dataset S4; Pubmed:19197353)
L2L_MM_ELONGINA_KO_DN	Downregulated in MES cells from elongin-A knockout mice
MIRNA_MM_WANG_MMU-MIR-30B-5P	WANG_MMU-MIR-30B-5P; Prediction of both conserved and nonconserved microRNA targets in animals 2008.
LIT_MM_BLOMBERG_ITKANTI-CD3_VS_ITKC_ITKANTI-CD3_CD28_VS_ITKC_CD3-T-CELL_DN	DN_2393 probe-set overlapping upon anti-CD3- and anti-CD3/CD28-stimulations in Itk-defective CD3+ T-cells (Additional file 6; Pubmed:19450280)
MIRNA_MM_BETEL_MMU-MIR-190	BETEL_MMU-MIR-190; Good mirSVR score Conserved; The microRNA.org resource: targets and expression.
CTD_MM_DASATINIB	dasatinib from CTD (Comparative Toxicogenomics Database), data from GeneSetDB.
STITCH_MM_URIDINE_DIPHOSPHATE-CID100001158	uridine diphosphate(CID100001158) from STITCH (Search Tool for Interactions of Chemicals), data from GeneSetDB.
LIT_MM_CHO_MAMMARY-TUMOR-VIRUS-WNT-1_BREAST-CANCER_TUMORIGENIC_NONTUMORIGENIC_DIFF	Identification of genes differentially expressed between tumorigenic and nontumorigenic mouse mammary tumor virus-Wnt-1 breast cancer cells. (Dataset S6-Figure 3; Pubmed:17975224)
LIT_MM_LOPEZ_EDKO_DN	down-EDKO vs Control (Table S1; Pubmed:19749746)
MIRNA_MM_VERGOULIS_MMU-MIR-30E-5P	VERGOULIS_MMU-MIR-30E-5P; TarBase 6.0: capturing the exponential growth of miRNA targets with experimental support.
MSIGDB_MM_GERY_CEBP_TARGETS	Genes changed in NIH 3T3 cells (embryonic fibroblast) by expression of one or more of C/EBP proteins: CEBPA, CEBPB, CEBPG, and CEBPD [GeneID=1050;1051;1054;1052].
LIT_MM_ZHOU_DICER-KO_DICER-HET_T-REG-CELL_DN	DN_Gene profiling of Dicer KO versus Dicer Het T reg cells (Table S1; Pubmed:18725525)
LIT_MM_TROWBRIDGE_LT-HSC-CRE_MPP-CRE_PROGEN-CRE_VS_CRE_DIFF	compared gene expression profiles of Dnmt1?/? versus control LT-HSCs, ST-HSC/MPPs and myeloid progenitors (denoted re+/Cre??. 484 genes were found to be differentially expressed with an absolute fold change >1 (Table S2; Pubmed:19796624)
LIT_MM_KOMASHKO_MESCELL_DIFFERENTIATE-INTO-EBS_DN	down-regulated when mES cells differentiate into EBs_Transition RNAs (Table S4; Pubmed:18347325)
STITCH_MM_DEXAMETHASONE-CID100003003	dexamethasone(CID100003003) from STITCH (Search Tool for Interactions of Chemicals), data from GeneSetDB.
LIT_MM_KURIMOTO_BLIMP1-KO_E_MB_EMBRYO_SOMATIC-PROGRAM-GENE_LOST_DIFF	Genes that lost significant difference from soma in Blimp1 KO embryos (E/MB stage) (Table S2-II-C; Pubmed:18559478)
LIT_MM_ISHIMATSU-TSUJI_CSA-TR-4D_HAIR_UP	UP Up- or down-regulated genes 4 days after the CsA-treatment (Table S2; Pubmed:20026683)
MSIGDB_MM_BURTON_ADIPOGENESIS_6	Strongly up-regulated at 96 h during differentiation of 3T3-L1 cells (fibroblast) into adipocytes.
MIRNA_MM_GRIMSON_MIR-495_1192	GRIMSON_MIR-495_1192; Predicted_Targets_Info; MicroRNA Targeting Specificity in Mammals: Determinants beyond Seed Pairing.
LIT_MM_BRUNSKILL_ENDO_GLOMWT_ENDOTHELIAL-CELL_DN	DN [endo] vs [glomwt]Differentially expressed endothelial genes. 786 genes with most distinct expression patterns across all endothelial cell samples (Suppl. Data S1; Pubmed:20706631)
LIT_MM_LINDSLEY_D4_DKK-PLUS_VS_DKK_UP	up-d4_Dkk+/d3_Dkk- (Table S1; Pubmed:18593559)
MIRNA_MM_WANG_MMU-MIR-384-5P	WANG_MMU-MIR-384-5P; Prediction of both conserved and nonconserved microRNA targets in animals 2008.
LIT_MM_OJALVO_INVASIVE-TAM_TRANSCRIPT_UP	DN Invasive TAM expression table for significantly (FDR=1%) called transcripts (Suppl. Table; Pubmed:20018620)
MIRNA_MM_WANG_MMU-MIR-20B-3P	WANG_MMU-MIR-20B-3P; Prediction of both conserved and nonconserved microRNA targets in animals 2008.
LIT_MM_JIANG_ESCELL_TRIPLE-RNAI_6D_UP	UP_6d_List of differentially expressed genes after Klf2, Klf4 and Klf5 depletion (Table S3; Pubmed:18264089)
LIT_MM_TOLGYESI_OVA_30D_LUNG_UP	UP_gene list containing transcripts which showed at least >2.0-fold statistically differential expression in group 2 relative to the common reference control (Table S4; Pubmed:19556304)
LIT_MM_YU_IL-2-DEPENDENT_C57BL_6_2RBTHYMUS_CD4-ANTI-CD3-T-EFFECTOR-CELL_DN	DN CD4 anti-CD3 T effector cell IL-2-dependent genes (2-fold) (Table S2; Pubmed:19185518)
LIT_MM_KOSSLER_NF1-MUT_MUSCLE_UP	UP_Averaged expression and significance levels for genes differentially expressed between NF1 and control muscles. (Table S1; Pubmed:21478499)
LIT_MM_SARTOR_HEPATOMA_BAP-TREATED_AHR-TARGET_DIFF	[Ba]P-treated cells_Top ranked 750 genes with promoters that bind AHR (Table S1; Pubmed:19654925)
LIT_MM_CAIAZZO_16-DIV-IDA_MEF_DIFF	List of all genes differentially expressed (> 5 fold change) between 16 DIV iDA cells and MEFs (Table S2; Pubmed:21725324)
MIRNA_MM_WANG_MMU-MIR-30A-5P	WANG_MMU-MIR-30A-5P; Prediction of both conserved and nonconserved microRNA targets in animals 2008.
MIRNA_MM_GRIMSON_MIR-29ABCD	GRIMSON_MIR-29ABCD; Predicted_Targets_Info; MicroRNA Targeting Specificity in Mammals: Determinants beyond Seed Pairing.
LIT_MM_ZUBER_MYB-SUPPRESSION_UP	Significantly upregulated genes following suppression of Myb (Table S1; Pubmed:21828272)
GENESIGDB_MM_TORCHIA_07_LEUKEMIA	Mouse Leukemia_Torchia07_928genes; 17875932-TableS4; data from GeneSigDB: http://compbio.dfci.harvard.edu/genesigdb/download/ALL_SIGSv4.gmt.
LIT_MM_OCHSNER_BMEL-CELL_D1-AGGREGATE_BASAL_D5-AGGREGATE_BASAL_DCHIP_GD_DIFF	Group D_list of probe set with an F p-value less than 0.001. (Table S2; Pubmed:17641245)
MIRNA_MM_KREK_MMU-MIR-451	KREK_MMU-MIR-451; Center for Comparative Functional Genomics; Department of Biology, New York University.
MSIGDB_MM_ZHANG_TLX_TARGETS_DN	Genes down-regulated in neural stem cells (NSC) at both 36 h and 60 h after cre-lox knockout of TLX (NR2E1) [GeneID=7101].
LIT_MM_MOLYNEUX_C9_TUMOUR_BLG-CRE-BRCA1_P53_SOM_UP	C9-High expression in tumours--Gene Expression Clusters in Blg-Cre Brca1f/f p53+/? Tumors Identified by SOM Analysis. (Table S4; Pubmed:20804975)
LIT_MM_WU_ADUSF1_TRANSCRIPTS_FEMALE_DIFF	Female Female and Male AdUSF1 differentially expressed transcripts (Table S2; Pubmed:19995791)
LIT_MM_BU_DIABETIC-APOE-NULL_RAGE-NULL_VS_NON-DIABETIC-APOE-NULL_DIFF	Differentially Expressed Genes in Diabetic ApoE null/RAGE null Relative to Diabetic ApoE null mice (Table SV; Pubmed:20133903)
LIT_MM_WAUTHIER_UNTREATED-MALE_VS_FEMALE_MALE-HYPOX_VS_MALE-SHAM_FEMALE-HYPOX_VS_FEMALE_SHAM_DIFF	Genes that are present in mouse and rat microarrays and sex-specific in at least one species. Shown are microarray fold changes and p-values for Untreated Male vs Female, Male hypox vs Male Sham, and Female Hypox vs Female Sham (Table S14; Pubmed:20150183)
MIRNA_MM_BETEL_MMU-MIR-1191	BETEL_MMU-MIR-1191; Good mirSVR score Conserved; The microRNA.org resource: targets and expression.
GO_MF_MM_CARBOHYDRATE_BINDING	GO:0030246 ; GO Term Name: carbohydrate binding ; GO domain: molecular_function ; GO Evidence Code: IEA
LIT_MM_MOHN_NP-TO-TN_H3K27ME3_GAIN_POLYCOMB-TARGET_DIFF	H3K27me3 gain from NP to TN (Table S1; Pubmed:18514006)
LIT_MM_FEDULOV_PREG-TIO2_PBS_NORM-TIO2_PBS_PREG_NORM_DIFF	Different across all samples via SAM analysis (Supplement B: EASE--SAM; Pubmed:17656681)
LIT_MM_GIAMBONINI-PMP_P4_VS_P60_DIFF	Wild-Type, P4 vs P60 (Table S3; Pubmed:15755691)
LIT_MM_HAMATANI_FUNCTIONAL-CLASSIFICATION_DIFF	The list of differentially expressed genes according to functional classification (Table S4; Pubmed:15232000)
LIT_MM_KURAGUCHI_TUMORS_INPUT-FOR-IPA_A-P-CALLS_UP	Input list of probes for Ingenuity Pathway Analysis. Information for 2,800 probes which were used as input for IPA.the probe that have either consistent absent (a) or present (p) calls, but not absent across all samples, i.e., ppp-ppp, aaa-ppp or ppp-aaa were used as input for Ingenuity Pathway Analysis Software (Dataset S2; Pubmed:19197353)
LIT_MM_ESTLER_MELAN-A-CELL_B16-CELL_DN	DN_List of genes whose expression is significantly different between the melan-a and B16 cell lines. (Additional file 2; Pubmed:18847503)
LIT_MM_CHALLEN_GFP-VE-URETERIC-TREE_VS_GFP-VE-CELL-POPULATION_UP	up-Triplicate microarray profiling of sorted GFP ve ureteric tree vs. the remaining GFP ve cell population was performed, and differential expression was defined using B statistics. All genes with a B score 0 were annotated using DAVID (Table S6; Pubmed:15998744)
LIT_MM_RONG_SS2-INFECTED-B6_VS_CONTROL-B6_DN	down-The differentially expressed genes between SS2-infected B6 and control B6 mice (Table S1; Pubmed:22384161)
LIT_MM_LIU_RAS_SIGNATURE_UP	UP Gene signature forRas pathway (Addi.l data file 2; Pubmed:?9094238)
MIRNA_MM_BETEL_MMU-MIR-450A-5P	BETEL_MMU-MIR-450A-5P; Good mirSVR score Non-conserved; The microRNA.org resource: targets and expression.
HPO_MM_ABNORMALITY_OF_THE_PERIPHERAL_NERVOUS_SYSTEM	Abnormality of the peripheral nervous system from HPO (Human Phenotype Ontology), data from GeneSetDB.
GO_CC_MM_GOLGI_APPARATUS	GO:0005794 ; GO Term Name: Golgi apparatus ; GO domain: cellular_component ; GO Evidence Code: IEA
LIT_MM_HEWITT_24H_INJECTED-VEHICLE-ESTREN-19NT-E2_DIFF	Fig.2B(24hours)--Uterine gene responses to E2 and estren. Ovariectomized mice were injected with vehicle, estren, 19NT, or E2. Uterine tissue was collected after 2 or 24 h, and RNA was isolated for microarray analysis (Table S2; Pubmed:16469803)
LIT_MM_WILSON_SCL_HPC-7_LIVER_DIFF	List of 228 peaks and associated genes ,Peaks Bound by Scl in HPC-7 (Table S3; Pubmed:19346495)
LIT_MM_SELMAN_WHITE-ADIPOSE_S6K_DN	Genes downregulated in white adipose tissue of S6K-/- mice compared to wild type mice. (Table S4b; Pubmed:19797661)
LIT_MM_HALDAR_SYT-SSX_DN	SYT-SSX DOWNregulated genes (Table S5; Pubmed:17418413)
LIT_MM_REYNOLDS_MBD3_VS_UP	Summary of genes showing increased expression in Mbd3-/- relative to wild type cell lines. (Table S2; Pubmed:22139358)
LIT_MM_RENTHAL_SALINE-HDAC5KO_SALINE_UP	UP_List of Saline-Treated HDAC5 KO vs. Saline-Treated WT Significantly Regulated Genes (Table S4; Pubmed:17988634)
STITCH_MM_GENISTEIN-CID105280961	genistein(CID105280961) from STITCH (Search Tool for Interactions of Chemicals), data from GeneSetDB.
LIT_MM_BRUNSKILL_DBGLOM_ENDO_ENDOTHELIAL-CELL_UP	UP [dbglom] vs [endo]Differentially expressed endothelial genes. 786 genes with most distinct expression patterns across all endothelial cell samples (Suppl. Data S1; Pubmed:20706631)
LIT_MM_HAYBAECK_3M-TG1223_9M-TG1223_LIVER_DN	DN Comparison of non-supervised DNA-microarray analysis of 3 and 9 month-old tg1223 livers,The differentially up- and downregulated mRNAs expressed in 3 month-old tg1223 when compared to 9 month-old tg1223 livers are indicated. (Table S12; Pubmed:19800575)
MIRNA_MM_WANG_MMU-MIR-5112	WANG_MMU-MIR-5112; Prediction of both conserved and nonconserved microRNA targets in animals 2008.
MIRNA_MM_VERGOULIS_MMU-MIR-301B-3P	VERGOULIS_MMU-MIR-301B-3P; TarBase 6.0: capturing the exponential growth of miRNA targets with experimental support.
MSIGDB_MM_MEISSNER_BRAIN_HCP_WITH_H3K4ME3_AND_H3K27ME3	Genes with high-CpG-density promoters (HCP) bearing histone H3 dimethylation at K4 (H3K4me2) and trimethylation at K27 (H3K27me3) in brain.
STITCH_MM_ACETATE-CID100000175	acetate(CID100000175) from STITCH (Search Tool for Interactions of Chemicals), data from GeneSetDB.
LIT_MM_WU_CORNEA_TENDON-LENS_DIFF	gene expression differences between cornea samples, tendon and lens (Table S1; Pubmed:18582462)
LIT_MM_TUMMALA_POL-II-CHIP-ON-CHIP_P-2_FIZ1_NEURAL-RETINA_UP	Genes activated after P-2, with Pol-II peak signal ratios ? 1.8, that recruit FIZ1 (Table S2; Pubmed:20161818)
MIRNA_MM_GRIMSON_MIR-101_101AB	GRIMSON_MIR-101_101AB; Predicted_Targets_Info; MicroRNA Targeting Specificity in Mammals: Determinants beyond Seed Pairing.
LIT_MM_JAMES_VEHICLE-PRIMARY-CHONDROCYTES-I_D3_D15_3_4_DIFF	Micromass culture-derived transcripts enriched in vehicle-treated primary chondrocytes (d3 vs d15_3/4). I. (Table 9; Pubmed:17603917)
LIT_MM_LEE_HDI-BT_LUNG_UP	Selected genes upregulated by HDI-BT exposure (Table 1; Pubmed:15885264)
LIT_MM_CAMATEROS_BALB_C_OVA_PBS_A-FUMIGATUS_PBS_UP	Genes identified in the present study, in either one of the BALB/c OVA-induced model, and in the A. fumigatus-induced model. (Table S14; Pubmed:19491150)
LIT_MM_YANG_CD4-TSC1_CD8-TSC1_DIFF	186 probe sets with ?2-fold difference in both CD4 Tsc1??vs WT and CD8 Tsc1??vs WT na鴳e T cells (Table S1; Pubmed:21765414)
LIT_MM_RIEHLE_PH_18H_SOCS3H-KO-LITTERMATE_DN	DN_differential gene expression in Socs3 h-KO mice versus control littermates at 18 h after PH (Table S1; Pubmed:18158318)
MSIGDB_MM_SNF5_DN.V1_UP	Genes up-regulated in MEF cells (embryonic fibroblasts) with knockout of SNF5 [Gene ID=6598] gene.
STITCH_MM_FE-III-CID000023925	Fe(III)(CID000023925) from STITCH (Search Tool for Interactions of Chemicals), data from GeneSetDB.
LIT_MM_LACAZE_CLUSTER1_5R_5C_MOCK_TRANSFECTION_UP	UP cluster1 5R vs. 5C Mock transfection gene expression clusters (Addi. file 1 ; Pubmed:19664281)
MIRNA_MM_GRIMSON_MIR-701	GRIMSON_MIR-701; Nonconserved_Family_Info; MicroRNA Targeting Specificity in Mammals: Determinants beyond Seed Pairing.
MIRNA_MM_GRIMSON_MIR-217	GRIMSON_MIR-217; Predicted_Targets_Info; MicroRNA Targeting Specificity in Mammals: Determinants beyond Seed Pairing.
LIT_MM_WEBER_TCF1LINEAGE-TCF1THY1-CD25_TCF1LINEAGE-TCF1THY1-CD25_DN	DN_Two fold gene lists from Figure 1e (Table S2; Pubmed:21814277)
MPO_MM_DECREASED_BONE_MINERAL_DENSITY	decreased bone mineral density from MPO (Mammalian Phenotype Ontology), data from GeneSetDB.
LIT_MM_SELMAN_PLASMA-METABONOMIC_ACUTE-CALORIC-RESTRICTION_LIVER_UP	up-liver--Coordinated multitissue transcriptional and plasma metabonomic profiles following acute caloric restriction in mice (Table S1; Pubmed:16882887)
LIT_MM_GENNET_ESC_DMRT5_DN	DN_transcription regulated by Dmrt5 (Dataset S1; Pubmed:21576465)
LIT_MM_GUNTHER_CASP8IEC_IEC_DN	DN_Differential gene expression in IEC(intestinal epithelial cells) from control and Casp8?IEC mice (Table S1; Pubmed:21921917)
LIT_MM_STINGL_MRU-ENRICHED-FRACTION_UP	Genes up-regulated in the MRU-enriched fraction (Table S5; Pubmed:16395311)
LIT_MM_ZUBER_TET-OFF-MLL-AF9_RAS_DOX_6D_UP	Significantly upregulated genes following MLL-AF9 withdrawal (Table S1; Pubmed:21828272)
MPO_MM_HEPATIC_STEATOSIS	hepatic steatosis from MPO (Mammalian Phenotype Ontology), data from GeneSetDB.
LIT_MM_DAHL_FIRST-LINEAGE-SPECIFICATION_H3K27ME3_ESCS-ONLY_DIFF	ESCs only GO terms and list of genes enriched in H3K4/K27me3 in the ICM only or in ESCs only (Table S8; Pubmed:20161773)
LIT_MM_TOLGYESI_OVA_31D_LUNG_DN	DN_gene list containing transcripts which showed at least >2.0-fold statistically differential expression in group 3 relative to the common reference control (Table S5; Pubmed:19556304)
LIT_MM_STRACKER_IRRADIATED_MOCK_THYMOCYTE_UP	UP_Significant expression changes between mock and irradiated WT thymocyte (Table S2; Pubmed:18614044)
LIT_MM_SZPARA_NEURITE-OUTGROWTH_DRG_SCG_SEMA3A_DIFF	genes observed by microarray to be significantly affected by exposure to Sema3A. (Additional file2-Sema3A effects; Pubmed:18036227)
MSIGDB_MM_WNT_UP.V1_UP	Genes up-regulated in C57MG cells (mammary epithelium) by over-expression of WNT1 [Gene ID=7471] gene.
GENESIGDB_MM_BOYLAN_07_BONE_2	Mouse Bone_Boylan07_200genes; 17483317-TableS3; data from GeneSigDB: http://compbio.dfci.harvard.edu/genesigdb/download/ALL_SIGSv4.gmt.
CTD_MM_GEMCITABINE	gemcitabine from CTD (Comparative Toxicogenomics Database), data from GeneSetDB.
LIT_MM_CHAMBERS_MYELOID_DEFINED-GROUP-CELL_DIFF	Myeloid -genes uniquely expressed in a defined group of cell types(Myeloid, Lymphoid, or all Differentiated cells (excluded from HSCs)) (Table S3; Pubmed:18371395)
LIT_MM_ULLOA-MONTOYA_MMAP_MSC_RMAPC-1_RCLONE-2_DN	DN_Common differentially expressed genes in both mMAPC vs MSC and rMAPC-1 vs rClone-2 comparisons (Table S14; Pubmed:17683608)
LIT_MM_ACEVEDO_IFGFR1-MEDIATEDPCA_4WEEK_UP	up-Gene Expression Profile for iFGFR1-Mediated PCa. -4week (Table S3; Pubmed:18068632)
LIT_MM_MANICHAIKUL_CONGENIC_B6-APOE_F_AORTIC-WALL_DIFF	Differentially expressed genes in the aortic wall of chromosome 9 congenic mice over B6.apoE-/- control mice. (Table S1; Pubmed:21666121)
LIT_MM_KOZUL_LUNG_10PPB-ARSENIC-DW_DN	DN_10 ppb Arsenic drinking water_Genes significantly altered by the As(Arsenic) exposure (Table S1; Pubmed:19654921)
MIRNA_MM_GRIMSON_MIR-425_425-5P_489	GRIMSON_MIR-425_425-5P_489; Predicted_Targets_Info; MicroRNA Targeting Specificity in Mammals: Determinants beyond Seed Pairing.
GO_BP_MM_NEGATIVE_REGULATION_OF_CELL_PROLIFERATION	GO:0008285 ; GO Term Name: negative regulation of cell proliferation ; GO domain: biological_process ; GO Evidence Code: ISS
LIT_MM_MACHOLD_E13.5_E10.5_CELL-CYCLE-PROTEIN_UP	Cell cycle protein genes enriched in granule cell precursors (Figure 5a-b-c-d; Pubmed:21440680)
LIT_MM_DUFOUR_HEART_ERRALPHA-ERRGAMMA_DIFF	Cellular Functional Classification of ChIP-on-Chip Target Genes Occupied by ERR?, ERR?, or Both in Mouse Heart at a Cutoff of p ? 0.01 (Table S1; Pubmed:17488637)
LIT_MM_CAM_C2C12-MOCK_MYOBLAST_DIFF	diff-This gene list comprises only genes with a more than 3-fold expression change during differentiation of C2C12-mock myoblasts. (Table S1; Pubmed:17045206)
LIT_MM_GEBEL_CS-EXPOSURE_KO-2M_UP	UP ko 2 m,the strong impact of CS(Cigarette Smoke) exposure on the transcriptome of rodent lung tissue cells (Table S1; Pubmed:20133372)
MIRNA_MM_WANG_MMU-MIR-1968-3P	WANG_MMU-MIR-1968-3P; Prediction of both conserved and nonconserved microRNA targets in animals 2008.
LIT_MM_YANG_LIVER_MALE_TGFBR2-HETEROZYGOUS-KO_DIFF	Liver gene expression signature of Tgfbr2 male heterozygous ko at p<0.05 (Table S5; Pubmed:19270708)
LIT_MM_TSUCHIYA_DF-CR-DF-CR_HEPATIC_DIFF	Complete list of the effects of DF, CR and DF and CR together on hepatic gene expression (Table S3; Pubmed:15039484)
MIRNA_MM_GRIMSON_MIR-384_384-3P	GRIMSON_MIR-384_384-3P; Predicted_Targets_Info; MicroRNA Targeting Specificity in Mammals: Determinants beyond Seed Pairing.
MIRNA_MM_KREK_MMU-MIR-341	KREK_MMU-MIR-341; Center for Comparative Functional Genomics; Department of Biology, New York University.
LIT_MM_NEWRZELLA_CA3_VS_CA1_NATIVE-STATE_DIFF	List of all significantly regulated genes in CA3 vs CA1 (native state (Table S2; Pubmed:17937787)
L2L_MM_ELONGINA_KO_UP	Upregulated in MES cells from elongin-A knockout mice
LIT_MM_YOSHIDA_RETINA_NRL_UP	UP_Differentially expressed genes identified by microarray and a minimum AFC threshold of 1.25 for statistical screening (Table SA; Pubmed:15163632)
LIT_MM_MOORE-MORRIS_TISSUE-RELATED-ENDOGPCR-PROTEIN_HEART_DIFF	Tissue-related expression of the 402 endoGPCRs and associated proteins in adult mouse heart (Table S1 ; Pubmed:?9229040)
LIT_MM_NOH_SRPA_ASYM_SYM_DN	ASYM/SYM_DN_Self-renewal pattern associated (SRPA) genes, including the 85-gene asymmetric self-renewal associated (ASRA) gene signature (Table S1; Pubmed:21818293)
LIT_MM_TOISCHER_SHUNT_VS_SHAM_UP	Upregulated in Shunt vs. Sham (Table S2; Pubmed:20733099)
MSIGDB_MM_LI_INDUCED_T_TO_NATURAL_KILLER_UP	Genes up-regulated in ITNK cells (T-lymphocyte progenitors (DN3 cells) reprogrammed to natural killer (NK) cells by ablation of BCL11B [GeneID=64919] gene), compared to the parental DN3 cells.
LIT_MM_TACHDJIAN_DOXYCYCLINE-TREATED_R576IL13TG_Q576IL13TG_DN	DN Differential gene expression in doxycycline-treated B6.129Il4raR576/R576/IL-13tg (R576IL13tg) versus B6.Il4raR576/R576/IL-13tg (Q576IL13tg) mice (Table S5; Pubmed:19770271)
MIRNA_MM_WANG_MMU-MIR-29B-2-5P	WANG_MMU-MIR-29B-2-5P; Prediction of both conserved and nonconserved microRNA targets in animals 2008.
MIRNA_MM_WANG_MMU-MIR-182-5P	WANG_MMU-MIR-182-5P; Prediction of both conserved and nonconserved microRNA targets in animals 2008.
LIT_MM_MOHN_NP-TO-TN_H3K27ME3_LOSS_POLYCOMB-TARGET_DIFF	H3K27me3 loss from NP to TN (Group 1 Fig. 4B) (Table S1; Pubmed:18514006)
MSIGDB_MM_IGLESIAS_E2F_TARGETS_UP	Genes up-regulated in pancreatic cells from mice with double knockout of E2F1 [GeneID=1869] and E2F2 [GeneID=1870] compared to wild type.
MPO_MM_DECREASED_CARDIAC_MUSCLE_CONTRACTILITY	decreased cardiac muscle contractility from MPO (Mammalian Phenotype Ontology), data from GeneSetDB.
LIT_MM_LIM_ESCELL_SALL4-OCT4-SOX2-NANOG_COMMON-TARGET_DIFF	List of Common Target Genes Bound by Four Factors (Table S8; Pubmed:18804426)
GENESIGDB_MM_SOH_07_EMBRYONIC_STEM_CELL	Mouse EmbryonicStemCell_Soh07_224genes_A; 17823238-TableS4a; data from GeneSigDB: http://compbio.dfci.harvard.edu/genesigdb/download/ALL_SIGSv4.gmt.
LIT_MM_BLUM_SCA-1HI-ONLY_STEM_PROGENITOR-CLUSTER-296_DIFF	Sca-1Hi-only Cluster #296 Transcripts significantly expressed in stem/progenitor clusters. Lists of transcripts that were significantly highly expressed in each of the clusters (UGE-only, UGE+Sca-1Hi, Sca-1Hi-only, Sca-1Hi+Sca-1Lo). The relative expression values (LR) compared to the average expression values of control samples (Sca-1Neg) are presented. Each folder contains the data of a separate…
LIT_MM_BRUNSKILL_ENDO_MED_ENDOTHELIAL-CELL_DN	DN [endo] vs [med]Differentially expressed endothelial genes. 786 genes with most distinct expression patterns across all endothelial cell samples (Suppl. Data S1; Pubmed:20706631)
LIT_MM_DRISKELL_GFP-CD133-PLUS_VS_GFP-CD133-PLUS_GFP-CD133-MINUS_UP	UP Genes differentially expressed in GFP? CD133+ compared with GFP+ CD133+ and GFP? CD133? dermal cells (Table S3; Pubmed:19605494)
LIT_MM_HLAING_HYPERTROPHY_C2C12-MYOBLAST_24_VS_0H_UP	up-Hypertrophy-responsive genes in C2C12 myoblasts-AngIIStimulation-24/0h (Table s; Pubmed:15304485)
LIT_MM_FEI_NOGGIN_GROUP-II_DN	noggin upregulated -Group II Differentially expressed genes in response to BMP4 or noggin (shown in four tabs) (Table S6; Pubmed:19926752)
LIT_MM_SHAROVA_RA_MC1-CELL_DN	Genes with statistically significant change of mRNA decay rates in MC1 cells after differentiation in RA conditions (Table S7; Pubmed:19001483)
LIT_MM_KOROSTYNSKI_C57BL_6J_MORPHINE_CHRONIC_DN	C57BL/6J_CHRONIC_DN_lists of probe sets of genes with expression altered by acute and chronic morphine (Additional file 2; Pubmed:17598886)
LIT_MM_ZEIGER_PREDICTED-TARGET-GENE-MIR-128A_DIFF	miR-128a Lists of predicted target genes for miR-196a, miR-499, miR-206, miR-125a-5p and miR-128a (Table S2; Pubmed:20145202)
MIRNA_MM_VERGOULIS_MMU-MIR-15A-5P	VERGOULIS_MMU-MIR-15A-5P; TarBase 6.0: capturing the exponential growth of miRNA targets with experimental support.
LIT_MM_POUSSIN_VISCERAL-ADIPOSE_H-WEIGHT_RIMONABANT_VEHICLE_DN	DN_Gene expression level in the VAT of H group mice treated with vehicle (Veh) 0r Rimonabant (Rimo). (Table S4; Pubmed:19030233)
GENESIGDB_MM_WOODRUFF_05_LUNG_NOT_CANCER_1	Mouse Lung_not_cancer_Woodruff05_2037genes; 16166618-SuppTable3; data from GeneSigDB: http://compbio.dfci.harvard.edu/genesigdb/download/ALL_SIGSv4.gmt.
GENESIGDB_MM_SMAELE_07_BRAIN_DE	Mouse Brain_DeSmaele07_122genes; 18231642-TableW1; data from GeneSigDB: http://compbio.dfci.harvard.edu/genesigdb/download/ALL_SIGSv4.gmt.
MIRNA_MM_BETEL_MMU-MIR-762	BETEL_MMU-MIR-762; Good mirSVR score Non-conserved; The microRNA.org resource: targets and expression.
LIT_MM_MOHN_ES-TO-NP_H3K27ME3_GAIN_POLYCOMB-TARGET_DIFF	H3K27me3 gain ES to NP, including targets that keep K27me3 from NP to TN (Table S1; Pubmed:18514006)
LIT_MM_GILLICH_PRDM14_EPISCS_VS_CONTROL_DN	Upregulated genes upon Prdm14 overexpression in EpiSCs compared to vector control (Table S1; Pubmed:22482507)
LIT_MM_MENDOZA-VILLANUEVA_K14E6-TRANSGENIC_CERVIX_DN	cervix_DN_List of genes with a significant altered gene expression in skin and cervix from K14E6 transgenic mice (Additional file1-Table S1; Pubmed:19036130)
LIT_MM_YOUNG_GENOTYPE-RAG1_DN	experimentTable-tsv-E-MEXP-3623--genotype-Rag1-_--CONDITION_DOWN (Gene Expression Atlas - E-MEXP-3623-EBI; Pubmed:23103862)
MPO_MM_MALE_INFERTILITY	male infertility from MPO (Mammalian Phenotype Ontology), data from GeneSetDB.
MSIGDB_MM_MARTINEZ_TP53_TARGETS_UP	Genes up-regulated in mice with skin specific knockout of TP53 [GeneID=7157].
LIT_MM_SAJAN_IE_LATE-ANALYSIS_DIFF	EML_Patterns within IE samples (Table S4; Pubmed:17660535)
STITCH_MM_CYCLIC_AMP-CID100000274	cyclic AMP(CID100000274) from STITCH (Search Tool for Interactions of Chemicals), data from GeneSetDB.
MIRNA_MM_WANG_MMU-MIR-466L-3P	WANG_MMU-MIR-466L-3P; Prediction of both conserved and nonconserved microRNA targets in animals 2008.
MSIGDB_MM_HOFFMANN_LARGE_TO_SMALL_PRE_BII_LYMPHOCYTE_UP	Genes up-regulated during differentiation from large pre-BII to small pre-BII lymphocyte.
LIT_MM_DIVINA_TOTAL-TESTIS_PEM-1-2PEMTT_MAPPED_DIFF	List of 1438 genes with preferential expression in total testis, PEM > 1/2PEMTT(max), mapped on mouse genome (Table S7; Pubmed:15748293)
MSIGDB_MM_ESC_V6.5_UP_EARLY.V1_DN	Genes down-regulated during early stages of differentiation of embryoid bodies from V6.5 embryonic stem cells.
MIRNA_MM_WANG_MMU-MIR-1927	WANG_MMU-MIR-1927; Prediction of both conserved and nonconserved microRNA targets in animals 2008.
LIT_MM_BRUNSKILL_GLOMMED_ENDOTHELIAL-CELL_DN	DN [glomwt] vs [med]Differentially expressed endothelial genes. 786 genes with most distinct expression patterns across all endothelial cell samples (Suppl. Data S1; Pubmed:20706631)
LIT_MM_DEEB_TRAMP_PROSTATE_TUMOR-SPECIFIC_DIFF	TRAMP Prostate Tumor-specific Genes (Table S3(Sl Info Table 1); Pubmed:17804718)
MIRNA_MM_WANG_MMU-MIR-124-3P	WANG_MMU-MIR-124-3P; Prediction of both conserved and nonconserved microRNA targets in animals 2008.
CTD_MM_TRICHOSTATIN_A	trichostatin A from CTD (Comparative Toxicogenomics Database), data from GeneSetDB.
LIT_MM_BIANCHI_I.PTH_VS_VEH_DN	downsignificantly regulated by i.PTH, c.PTH and i.PTH vs Veh (Table S1; Pubmed:19560570)
MIRNA_MM_KREK_MMU-MIR-369-5P	KREK_MMU-MIR-369-5P; Center for Comparative Functional Genomics; Department of Biology, New York University.
MIRNA_MM_WANG_MMU-MIR-429-5P	WANG_MMU-MIR-429-5P; Prediction of both conserved and nonconserved microRNA targets in animals 2008.
GENESIGDB_MM_JEONG_05_UTERINE_3	Mouse Uterine_Jeong05_634genes; 15845616-SuppTable3; data from GeneSigDB: http://compbio.dfci.harvard.edu/genesigdb/download/ALL_SIGSv4.gmt.
LIT_MM_WANG_LOSS-OF-MLL1_DN	DN 2,265 genes were upregulated and 2,459 genes were downregulated upon loss of Mll1 (Table S2; Pubmed:19703992)
STITCH_MM_TROGLITAZONE-CID100005591	troglitazone(CID100005591) from STITCH (Search Tool for Interactions of Chemicals), data from GeneSetDB.
MPO_MM_RESPIRATORY_DISTRESS	respiratory distress from MPO (Mammalian Phenotype Ontology), data from GeneSetDB.
LIT_MM_LI_JARID2_ES-CELL_DIFF	Top 1000 genes targeted by Jarid2 in ES cells (Table S2; Pubmed:20123894)
LIT_MM_ZHANG_GLV-1H68_3-6W_DN	green_Host gene expression profiling analysis (Table S1-mouse chip; Pubmed:17942938)
MIRNA_MM_WANG_MMU-MIR-27B-3P	WANG_MMU-MIR-27B-3P; Prediction of both conserved and nonconserved microRNA targets in animals 2008.
LIT_MM_WU_ES_TET1-KD-KD_NANOG-OE_TET1-TARGET_DN	DN_The effect of Nanog overexpression (OE) in Tet1 KD ES cells in dysregulated Tet1 direct targets (Table S6; Pubmed:21451524)
MIRNA_MM_WANG_MMU-MIR-501-5P	WANG_MMU-MIR-501-5P; Prediction of both conserved and nonconserved microRNA targets in animals 2008.
STITCH_MM_PHORBOL_ESTER-CID110282255	phorbol ester(CID110282255) from STITCH (Search Tool for Interactions of Chemicals), data from GeneSetDB.
MIRNA_MM_GRIMSON_MIR-499-5P	GRIMSON_MIR-499-5P; Predicted_Targets_Info; MicroRNA Targeting Specificity in Mammals: Determinants beyond Seed Pairing.
STITCH_MM_LTC4-CID005280493	LTC4(CID005280493) from STITCH (Search Tool for Interactions of Chemicals), data from GeneSetDB.
MSIGDB_MM_GROSS_HYPOXIA_VIA_HIF1A_UP	Genes up-regulated in SEND cells (skin endothelium) at hypoxia after knockdown of HIF1A [GeneID=3091] by RNAi.
MPO_MM_ABNORMAL_KIDNEY_MORPHOLOGY	abnormal kidney morphology from MPO (Mammalian Phenotype Ontology), data from GeneSetDB.
CTD_MM_COCAINE	Cocaine from CTD (Comparative Toxicogenomics Database), data from GeneSetDB.
MSIGDB_MM_GROSS_HYPOXIA_VIA_ELK3_UP	Genes up-regulated in SEND cells (skin endothelium) at hypoxia with ELK3 [GeneID=2004] knockdown by RNAi.
LIT_MM_SENOCAK_METABOLIC_3T3-L1-ADIPOCYTE_UCP1_DIFF	Metabolic process genes in 3T3-L1 adipocytes altered with UCP1 expression. (Table S2; Pubmed:18061577)
MIRNA_MM_VERGOULIS_MMU-MIR-9-5P	VERGOULIS_MMU-MIR-9-5P; TarBase 6.0: capturing the exponential growth of miRNA targets with experimental support.
GENESIGDB_MM_LU_06_LUNG_ARRAY_MEO430AV2	Mouse Lung_Lu06_856genes_Array MEO430Av2; 16488994-SuppTable1b; data from GeneSigDB: http://compbio.dfci.harvard.edu/genesigdb/download/ALL_SIGSv4.gmt.
LIT_MM_HASTON_B6_BLEOMYCIN-TREATED_C3H_DIFF	differences between the B6 response to the drug relative to control (supplementary table 1) (Table S1; Pubmed:15937080)
MIRNA_MM_BETEL_MMU-MIR-412	BETEL_MMU-MIR-412; Good mirSVR score Non-conserved; The microRNA.org resource: targets and expression.
LIT_MM_HE_FL-HSC_BM-HSC_UP	Gene that are preferentially expressed in fetal liver HSC as compared to bone marrow HSCs (Table S2; Pubmed:21828271)
LIT_MM_HUNTER_AKR_DBA_SPLEEN_DIFF	Mouse AKR vs DBA spleen gene list (Table S8; Pubmed:19118016)
MIRNA_MM_WANG_MMU-MIR-5101	WANG_MMU-MIR-5101; Prediction of both conserved and nonconserved microRNA targets in animals 2008.
MIRNA_MM_GRIMSON_MIR-338_338-3P	GRIMSON_MIR-338_338-3P; Predicted_Targets_Info; MicroRNA Targeting Specificity in Mammals: Determinants beyond Seed Pairing.
LIT_MM_AYOUB_E14.5_BRAIN_CP_DIFF	CP_Summary of GO functional analysis by biological and disease processes (Table S3; Pubmed:21873192)
LIT_MM_PAUL_PIK3CG_DN	DN_Differentially expressed genes between Pik3cg-/- and wild-type mice (Table S7; Pubmed:21738486)
MIRNA_MM_GRIMSON_MIR-144	GRIMSON_MIR-144; Predicted_Targets_Info; MicroRNA Targeting Specificity in Mammals: Determinants beyond Seed Pairing.
LIT_MM_NISHIYAMA_TF-ESX1_ES-CELL_DN	Esx1 Genes up-regulated or down-regulated >=2 fold in response to manipulation of transcription factors (Table S3; Pubmed:19796622)
MSIGDB_MM_ZHANG_TLX_TARGETS_60HR_UP	Genes up-regulated in neural stem cells (NSC) at 60 h after cre-lox knockout of TLX (NR2E1) [GeneID=7101].
GENESIGDB_MM_PIECHOCKI_08_BREAST_1	Mouse Breast_Piechocki08_558genes; 18435859-ShorterGeneList; data from GeneSigDB: http://compbio.dfci.harvard.edu/genesigdb/download/ALL_SIGSv4.gmt.
LIT_MM_FEUERER_FAT-TREG_FAT-TCONV_UP	UP_Fat Treg specific genes (Table SI; Pubmed:19633656)
GO_BP_MM_MULTICELLULAR_ORGANISMAL_DEVELOPMENT	GO:0007275 ; GO Term Name: multicellular organismal development ; GO domain: biological_process ; GO Evidence Code: IEA
LIT_MM_TIMMONS_BROWN-PREADIPOCYTE_4D_8D_UP	Brown preadipocyte upregulated gene changes from day 4 to day 8 in culture (Dataset S2; Pubmed:17360536)
LIT_MM_PETRI_NGN3-DEFICIENT_E15_DIFF	robust difference in expression levels between Ngn3-deficient and wild-type mice at e15--The effect of neurogenin3 deficiency on pancreatic gene expression in embryonic mice. (Table S3; Pubmed:17032746)
LIT_MM_GRIFFIN_LURKO_NORMAL_TESTOSTERON-2.5MG_LATE_UP	UP,late,This file lists the oligonucleotide probes from the second phase response to LH insensitivity, i.e. those significantly different from control at day 8, 13 or 19, but not at day 3. Genes showing a significant response to testosterone treatment in either the time course or dose response experimental series are indicated. Heat maps for the early, medium and late categories are shown below (…
LIT_MM_FLYGARE_BFU-E_100NM-DEX_UP	The 83 genes expressed more than 2-fold higher in BFU-E cells cultured with 100nM Dexamethasone (Table S3; Pubmed:21177435)
MIRNA_MM_WANG_MMU-MIR-27A-3P	WANG_MMU-MIR-27A-3P; Prediction of both conserved and nonconserved microRNA targets in animals 2008.
LIT_MM_MEHRABIAN_LIVER_BXD-CROSS_ALOX5-LOCUS_DIFF	Liver gene expression traits from the BXD cross that were significantly linked to the Alox5 locus. (Table S1; Pubmed:16200066)
LIT_MM_LEUENBERGER_GENDER_LIVER_UP	UP Genes significantly affected by the gender (female vs. male) in liver (Table S3; Pubmed:19729835)
CTD_MM_ISOFLAVONES	Isoflavones from CTD (Comparative Toxicogenomics Database), data from GeneSetDB.
MSIGDB_MM_GAUSSMANN_MLL_AF4_FUSION_TARGETS_E_UP	Up-regulated genes from the set E (Fig. 5a): specific signature shared by cells expressing either MLL-AF4 [GeneID=4297;4299] or AF4-MLL fusion proteins alone, and those expressing both fusion proteins.
MPO_MM_INCREASED_BODY_WEIGHT	increased body weight from MPO (Mammalian Phenotype Ontology), data from GeneSetDB.
LIT_MM_RENTHAL_PCREB-TARGET-GENE_SALINE_DIFF	Phospho-CREB target genes in chronic saline-treated mice (Table S10; Pubmed:19447090)
MSIGDB_MM_ZHONG_SECRETOME_OF_LUNG_CANCER_AND_FIBROBLAST	Proteins secreted in co-culture of LKR-13 tumor cells (non-small cell lung cancer, NSCLC) and MLg stroma cells (fibroblasts).
LIT_MM_NISHIYAMA_TF-CDX2_ES-CELL_DN	Cdx2 Genes up-regulated or down-regulated >=2 fold in response to manipulation of transcription factors (Table S3; Pubmed:19796622)
LIT_MM_OATLEY_THY1_VS_THY1_6-DPP_DIFF	Functional classification of genes expressed 10-fold or greater in Thy1+ cell fractions as compared with Thy1-depleted cell populations isolated from 6-dpp mouse testes (Table 1,S1; Pubmed:19270176)
LIT_MM_PORTER_EXTRAOCULAR_JAW_LEG-MUSCLE_DIFF	Expression differences between extraocular and jaw or leg muscles (Table S5; Pubmed:11572940)
LIT_MM_WU_ES_TET1-DEPLETED_DN	DN_Differentially expressed genes between control and Tet1-depleted ES cells (Table S5; Pubmed:21451524)
LIT_MM_JIANG_ESCELL_TRIPLE-RNAI_2D_DN	DN_2d_List of differentially expressed genes after Klf2, Klf4 and Klf5 depletion (Table S3; Pubmed:18264089)
LIT_MM_SNYDER_NAPHTHALENEINDUCED-INJURY-REPAIR-GENE_NODE278_UP	Productive repair gene signature (Node 278) (Table SE1; Pubmed:18978301)
MIRNA_MM_GRIMSON_MIR-224	GRIMSON_MIR-224; Predicted_Targets_Info; MicroRNA Targeting Specificity in Mammals: Determinants beyond Seed Pairing.
LIT_MM_KEEN_ROSIGLITAZONE_DN	Genes Down-Regulated by Rosiglitazone (Table S3; Pubmed:15054141)
MIRNA_MM_GRIMSON_MIR-139-5P	GRIMSON_MIR-139-5P; Predicted_Targets_Info; MicroRNA Targeting Specificity in Mammals: Determinants beyond Seed Pairing.
TFACTS_MM_TFAP2A	Target genes of transcription factor TFAP2A, predicted by TFactS, data from GeneSetDB.
LIT_MM_HAABETH_TUMORICIDAL-MACROPHAGE_DN	Genes that are downregulated in tumoricidal macrophages (Data Supplement 2; Pubmed:21407206)
LIT_MM_GEBEL_CS-EXPOSURE_KO-1D_UP	UP ko 1 d,the strong impact of CS(Cigarette Smoke) exposure on the transcriptome of rodent lung tissue cells (Table S1; Pubmed:20133372)
LIT_MM_MA_PRDM14-DN_ESC_UP	UP_Genes affected by Prdm14 downregulation (Dataset S1; Pubmed:21183938)
MPO_MM_ABNORMAL_ENZYME_COENZYME_ACTIVITY	abnormal enzyme/coenzyme activity from MPO (Mammalian Phenotype Ontology), data from GeneSetDB.
MIRNA_MM_WANG_MMU-MIR-3085-3P	WANG_MMU-MIR-3085-3P; Prediction of both conserved and nonconserved microRNA targets in animals 2008.
MIRNA_MM_WANG_MMU-MIR-103-1-5P	WANG_MMU-MIR-103-1-5P; Prediction of both conserved and nonconserved microRNA targets in animals 2008.
LIT_MM_YIP_DEAF1-KO_PLN_UP	Top genes upregulated in the PLN(pancreatic lymph node) of Deaf1-KO mice relative to wild-type BALB/c controls. (Table S2; Pubmed:19668219)
MIRNA_MM_BETEL_MMU-MIR-551B	BETEL_MMU-MIR-551B; Good mirSVR score Non-conserved; The microRNA.org resource: targets and expression.
HPO_MM_ABNORMALITY_OF_THE_URINARY_SYSTEM_PHYSIOLOGY	Abnormality of the urinary system physiology from HPO (Human Phenotype Ontology), data from GeneSetDB.
LIT_MM_TRIMARCHI_RETINAL-CRYOSECTIONS_ISH_DIFF	A complete list of all the specific ISH probes used in this study and a summary of their expression patterns (Table S8; Pubmed:18270576)
MIRNA_MM_WANG_MMU-MIR-5097	WANG_MMU-MIR-5097; Prediction of both conserved and nonconserved microRNA targets in animals 2008.
LIT_MM_ESTLER_MELAN-A-CELL_B16-CELL_UP	UP_List of genes whose expression is significantly different between the melan-a and B16 cell lines. (Additional file 2; Pubmed:18847503)
LIT_MM_ISHIBASHI_OLIGODENDROCYTE-PRECURSOR-CELL_P10_LIF_OPTIC-NERVE_UP	Genes Enriched in OPCs (Cahoy et al., 2008) and upregulated in LIF-/- optic nerve at postnatal day 10 (Table SI; Pubmed:19598242)
LIT_MM_LACAZE_IFNB_IFN-RISCFREE_IFN_RNAI_UP	UP IfnB_IFN- vs. Riscfree_IFN-,RNAi gene expression clusters (Addi. file 8; Pubmed:19664281)
LIT_MM_OSORIO-Y-FORTEA_L-AMAZONENSIS-HARBOR-M-PHIS_PARASITE-FREE-M-PHIS_DIFF	List of differentially expressed genes between L. amazonensis-harboring M?s and parasite-free M?s. (Additional file1-Table2; Pubmed:19302708)
MIRNA_MM_WANG_MMU-MIR-450A-1-3P	WANG_MMU-MIR-450A-1-3P; Prediction of both conserved and nonconserved microRNA targets in animals 2008.
LIT_MM_PULIPPARACHARUVIL_MEF2_UP	List of significantly enriched genes identified by MEF2 ChIP on chip analysis (Table S1; Pubmed:18760698)
LIT_MM_GILLICH_DAY4_LIF-STAT3_UP	genes up_day 4 in LIF-Stat3 (Table S3; Pubmed:22482507)
LIT_MM_RUSH_AORTA_NOAAA-GROUP_SALINE_DN	noAAA_DN_List of transcripts differentially expressed in aortas of mice exposed to angiotensin II which did not develop aneurysms (no AAA) and saline controls (Additional file 5; Pubmed:19580648)
MPO_MM_ATAXIA	ataxia from MPO (Mammalian Phenotype Ontology), data from GeneSetDB.
STITCH_MM_ACETATE-CID000000175	acetate(CID000000175) from STITCH (Search Tool for Interactions of Chemicals), data from GeneSetDB.
MIRNA_MM_WANG_MMU-MIR-532-3P	WANG_MMU-MIR-532-3P; Prediction of both conserved and nonconserved microRNA targets in animals 2008.
MIRNA_MM_GRIMSON_MIR-186	GRIMSON_MIR-186; Predicted_Targets_Info; MicroRNA Targeting Specificity in Mammals: Determinants beyond Seed Pairing.
MIRNA_MM_BETEL_MMU-MIR-1933-3P	BETEL_MMU-MIR-1933-3P; Good mirSVR score Non-conserved; The microRNA.org resource: targets and expression.
LIT_MM_ESAU_LIVER_4W_ALINE_VS_MIR-122-ASO-2W_UP	Upregulated Genes-Liver gene expression was evaluated following 4 weeks of treatment with 50 mg/kg of miR-122 ASO twice weekly and was compared with saline-treated animals (Tables S1 and S2). (Table S1; Pubmed:16459310)
MSIGDB_MM_CUI_TCF21_TARGETS_2_UP	All significantly up-regulated genes in kidney glomeruli isolated from TCF21 [Gene ID=6943] knockout mice.
MSIGDB_MM_MARTINEZ_RB1_AND_TP53_TARGETS_DN	Genes down-regulated in mice with skin specific double knockout of both RB1 and TP53 [GeneID=5925;7157] by Cre-lox.
LIT_MM_YIP_DEAF1-KO_PLN_DN	Top genes downregulated in the PLN(pancreatic lymph node) of Deaf1-KO mice relative to wild-type BALB/c controls. (Table S1; Pubmed:19668219)
LIT_MM_RENTHAL_COCAINE-SALINE_UP	UP_List of Cocaine-Treated WT vs. Saline-Treated WT Significantly Regulated Genes (Table S5; Pubmed:17988634)
LIT_MM_LOH_ESCELL_JMJD2C-KO_UP	UP_List of differentially expressed genes from gene expression profiling of Jmjd2c knockdown ES cells (Table S1-Worksheet 2; Pubmed:17938240)
MIRNA_MM_KREK_MMU-MIR-125B-3P	KREK_MMU-MIR-125B-3P; Center for Comparative Functional Genomics; Department of Biology, New York University.
LIT_MM_TABUCHI_C4-FUNCTIONAL_CELLS-TREATED-SB_DIFF	cluster ?-The functional category and pathway analyses of the probe sets of the four clusters obtained by the hierarchical clustering of differentially expressed genes in cells treated with SB were explored using the Ingenuity Pathways Knowledge Base (Table S3; Pubmed:16678170)
LIT_MM_MILENKOVIC_FERULIC-ACID_UP	up-Ferulic acid --- List of differentially expressed mRNAs (Table S5; Pubmed:22253797)
STITCH_MM_PHORBOL_ESTER-CID010282255	phorbol ester(CID010282255) from STITCH (Search Tool for Interactions of Chemicals), data from GeneSetDB.
MIRNA_MM_BETEL_MMU-MIR-151-5P	BETEL_MMU-MIR-151-5P; Good mirSVR score Conserved; The microRNA.org resource: targets and expression.
LIT_MM_READ_CD15_VS_CD15_CELL_DN	DN_Genes Differentially Expressed in CD15+ vs. CD15?Cells (Table S1; Pubmed:19185848)
SIDER_MM_VASODILATION	Vasodilation from SIDER (SIDe Effect Resource), data from GeneSetDB.
MIRNA_MM_BETEL_MMU-MIR-186_1	BETEL_MMU-MIR-186_1; Good mirSVR score Conserved; The microRNA.org resource: targets and expression.
MSIGDB_MM_MARTINEZ_RB1_TARGETS_UP	Genes up-regulated in mice with skin specific knockout of RB1 [GeneID=5925] by Cre-lox.
L2L_MM_POD1_KO_UP	Up-regulated in glomeruli isolated from Pod1 knockout mice, versus wild-type controls
MIRNA_MM_BETEL_MMU-MIR-138_1	BETEL_MMU-MIR-138_1; Good mirSVR score Conserved; The microRNA.org resource: targets and expression.
MIRNA_MM_BETEL_MMU-MIR-1899	BETEL_MMU-MIR-1899; Good mirSVR score Conserved; The microRNA.org resource: targets and expression.
LIT_MM_WONG_FUNCTIONAL_P16-NFIA-MICE_DIFF	Functional assignment of genes dysregulated in P16 Nfia-/- mice (file S2; Pubmed:17475010)
MIRNA_MM_BETEL_MMU-MIR-488_1	BETEL_MMU-MIR-488_1; Good mirSVR score Non-conserved; The microRNA.org resource: targets and expression.
LIT_MM_MILENKOVIC_PROANTHOCYANIDIN_UP	up-Proanthocyanidin --- List of differentially expressed mRNAs (Table S5; Pubmed:22253797)
MIRNA_MM_BETEL_MMU-MIR-877	BETEL_MMU-MIR-877; Good mirSVR score Non-conserved; The microRNA.org resource: targets and expression.
GO_MF_MM_ACTIN_BINDING	GO:0003779 ; GO Term Name: actin binding ; GO domain: molecular_function ; GO Evidence Code: IEA
MICROCOSM_TARGETS_MM_HSA-MIR-766	hsa-miR-766 from MicroCosm Targets, data from GeneSetDB.
LIT_MM_ESCUDERO_MAD_VP16_KK1-CELL_UP	UP Pairwise analysis of differentially expressed genes in KK1 cells. Group NR: mock vs. Mad (Addi. file 3; Pubmed:20167115)
STITCH_MM_TROGLITAZONE-CID000005591	troglitazone(CID000005591) from STITCH (Search Tool for Interactions of Chemicals), data from GeneSetDB.
LIT_MM_CAMATEROS_ANTIGEN-CHALLENGED_RES_A_J_VS_C57BL_6_DIFF	Genes whose expression was significantly different between antigen challenged, and resiquimod(RES) treated, A/J and C57BL/6 mice. (Table S4; Pubmed:19491150)
LIT_MM_WATERS_MACROPHAGE_500NM-AMORPHOUS-SILICA_2H_DIFF	500nm ANOVA list 503 genes (Table S1; Pubmed:19073995)
CTD_MM_CANDOXIN	candoxin from CTD (Comparative Toxicogenomics Database), data from GeneSetDB.
CTD_MM_FENRETINIDE	Fenretinide from CTD (Comparative Toxicogenomics Database), data from GeneSetDB.
LIT_MM_TATARAKIS_30D_LIVER_TAF10-LOX_VS_LOX-ALBCRE_UP	Genes Upregulated in Postnatal day 30 (P30) livers of TAF10 lox/lox-AlbCre mice (Table S1; Pubmed:18722179)
LIT_MM_BAE_SMAD3-LOSS_TGFB1-MEDIATED-V-RASHA_KERATINOCYTS_DIFF	Effect of Smad3 Loss on TGFb1 mediated gene expression in normal and v-rasHa expressing primary mouse keratinocytes (Table S2; Pubmed:18942075)
LIT_MM_SCOTTON_BLEOMYCIN-14D_C57BL6_J_WHOLE-LUNG-HOMOGENATES_UP	UP Genes regulated in whole lung homogenates 14 days following bleomycin instillation in wild-type C57Bl6/J mice (Table S1 ; Pubmed:19652365)
LIT_MM_PRINZEN_5M_FEMALE_MONO-TRANSGENIC-ADAM10_FVB_N_DIFF	Complete list of significantly regulated genes in mono-transgenic ADAM10 mice (three female 5 months old ADAM10 mice as well as FVB/N wild-type mice) (Table S1; Pubmed:19196476)
MIRNA_MM_WANG_MMU-MIR-344G-3P	WANG_MMU-MIR-344G-3P; Prediction of both conserved and nonconserved microRNA targets in animals 2008.
LIT_MM_ASP_MYOTUBE_H3K27ME3_MYH-LOCI_CLUSTER2_DN	cluster2_Permanently repressed genes (Dataset S1; Pubmed:21551099)
LIT_MM_PANTOJA_DIM_NOT-DEX_PREADIPOCYTE_DIFF	Log2 fold values of DIM-regulated genes, not affected by dex treatment (Table S1; Pubmed:18653467)
MIRNA_MM_BETEL_MMU-MIR-290-3P	BETEL_MMU-MIR-290-3P; Good mirSVR score Non-conserved; The microRNA.org resource: targets and expression.
LIT_MM_ULLOA-MONTOYA_MSC_MSC-LIKE_UP	Differentially expressed genes between MSC and MSC-like cells (Table S9; Pubmed:17683608)
GENESIGDB_MM_WANG_05_LEUKEMIA	Mouse Leukemia_Wang05_59genes; 15755900-Table2; data from GeneSigDB: http://compbio.dfci.harvard.edu/genesigdb/download/ALL_SIGSv4.gmt.
LIT_MM_STEGMANN_HIGH-ENDODERM_VS_LOW-VILLI_PRIMO-DATABASE_DN	Genes that are down-regulated from a high level of expression in the endoderm to a low level of expression in the villi and that have promoters in the PRIMO database.The fold change column indicates the down-regulation from endoderm to villus (Table S5; Pubmed:16868071)
LIT_MM_RICARD_DF11-17_DP11-17_HIPPOCAMPUS_DIFF	Transcripts differentially expressed in the hippocampus of Df(11)17/Dp(11)17 mouse. (Table S4; Pubmed:21124890)
LIT_MM_WALSH_CELL-CYCLE-ASSOCIATED-GENE_NEONATAL_HEART_UP	Neonatal up-regulated cell cycle associated genes (Table S2 ; Pubmed:20071355)
LIT_MM_SIEVERTZON_NS_VS_PACAP_PROL-CONT_DIFF-CONT_DIFF	Differentially expressed genes in the overlap between all treatments (NS vs. PACAP, NS vs. Prol Cont and NS vs. Diff Cont) (Table S3; Pubmed:16124881)
MIRNA_MM_BETEL_MMU-MIR-380-5P	BETEL_MMU-MIR-380-5P; Good mirSVR score Non-conserved; The microRNA.org resource: targets and expression.
LIT_MM_SCIUTO_BIOLOGICAL-PROCESS_PHOSGENE-EXPOSURE_DIFF	Biological processes most significantly affected by phosgene exposure (p<0.01). (Table S3; Pubmed:16300373)
LIT_MM_HANADA_FIBULIN-R-R_DN	down-Fibulin R/R (Table S4; Pubmed:17293478)
LIT_MM_CAIRO_RC1_VS_RC2_SUBCLASSE_DN	down-differentially expressed between rC1 and rC2 subclasses and sorted by expression fold change (p < 0.001, FDR < 0.02). Beta-catenin targets and Wnt-pathway related genes are marked in blue (Table S7; Pubmed:19061838)
MIRNA_MM_WANG_MMU-MIR-3061-5P	WANG_MMU-MIR-3061-5P; Prediction of both conserved and nonconserved microRNA targets in animals 2008.
LIT_MM_CHAUSIAUX_13D_HPG_TESTIS_UP	up-deregulated at day 13 in the hpg mouse testis compared to the age matched WT testis (Table S3; Pubmed:17671269)
LIT_MM_HONG_PCT-SHBG_PCT-SHBG-S42L_TESTOSTERONE_DHT_UP	UP_androgen-regulated genes the expression of which is either enhanced or suppressed by the presence of SHBG in PCT cells (Table S2; Pubmed:21193555)
MIRNA_MM_WANG_MMU-MIR-543-3P	WANG_MMU-MIR-543-3P; Prediction of both conserved and nonconserved microRNA targets in animals 2008.
MSIGDB_MM_BROWN_MYELOID_CELL_DEVELOPMENT_DN	Genes defining proliferation and self renewal potential of the bipotential myeloid cell line FDB.
LIT_MM_TEITZ_NEUROBLASTOMAS_MOUSE_HUMAN_2-QUARTILE_DIFF	Data on the 125 unigenes of interest NB differ between mouse and human by at least two quartiles (Table S2; Pubmed:21559450)
MSIGDB_MM_CRX_NRL_DN.V1_UP	Genes up-regulated in retina cells from CRX and NRL [Gene ID=1406, 4901] double knockout mice.
LIT_MM_ALY_LUNG_IFNGAMMA-IRF1_MOCK_C4_DIFF	cluster4_IFN-?- and IRF-1-dependent gene expression according to k-means clusters shown in Fig. 7 (Table S2; Pubmed:18705699)
LIT_MM_RINGHOFF_STMN1MEFS_VS_STMN1MEFS_UP	UP Genes differentially expressed in STMN1-/- MEFs compared to STMN1+/+ MEFs (Addi. file 2; Pubmed:19643027)
MIRNA_MM_KREK_MMU-MIR-423-3P	KREK_MMU-MIR-423-3P; Center for Comparative Functional Genomics; Department of Biology, New York University.
LIT_MM_CHAHROUR_MECP2-TG_DN	The list of genes that are repressed by MeCP2 (Table S2; Pubmed:18511691)
LIT_MM_WU_ES_TET1-KD-KD_NANOG-OE_TET1-TARGET_UP	UP_The effect of Nanog overexpression (OE) in Tet1 KD ES cells in dysregulated Tet1 direct targets (Table S6; Pubmed:21451524)
MIRNA_MM_WANG_MMU-MIR-664-5P	WANG_MMU-MIR-664-5P; Prediction of both conserved and nonconserved microRNA targets in animals 2008.
MIRNA_MM_GRIMSON_MIR-19AB	GRIMSON_MIR-19AB; Predicted_Targets_Info; MicroRNA Targeting Specificity in Mammals: Determinants beyond Seed Pairing.
LIT_MM_HAYBAECK_3M-TG1223_IKKBDHEP_VS_9M-TG1223_IKKBDHEP_LIVER_UP	UP Comparison of non-supervised DNA-microarray analysis of 3 and 9 month-old tg1223/IKKbDhep livers,The differentially up- and downregulated mRNAs expressed in 3 month-old tg1223/IkkbDhep when compared to 9 month-old tg1223/IkkbDhep livers are indicated (Table S13; Pubmed:19800575)
LIT_MM_RUSH_AORTA_AAA-GROUP_SALINE_UP	AAA_UP_List of transcripts differentially expressed in aortas of mice exposed to angiotensin II which developed aneurysms (AAA) and saline controls (Additional file 4; Pubmed:19580648)
MIRNA_MM_BETEL_MMU-MIR-292-3P	BETEL_MMU-MIR-292-3P; Good mirSVR score Non-conserved; The microRNA.org resource: targets and expression.
LIT_MM_GEHRIG_P14_RETINOSCHISIN-DEFICIENT_RETINA_EARLY_DN	down-significantly regulated genes at P14 at a false discovery rate of 5% (Table S4; Pubmed:17251492)
GO_MF_MM_PHOSPHOLIPID_BINDING	GO:0005543 ; GO Term Name: phospholipid binding ; GO domain: molecular_function ; GO Evidence Code: IEA
LIT_MM_BYSTRYKH_TRANS_HEMATOPOIETIC-STEM-CELL-TRANSCRIPT_DIFF	COMPLETE LIST OF TRANS-REGULATED HEMATOPOIETIC STEM CELL TRANCRIPTS (Table S3; Pubmed:15711547)
MSIGDB_MM_COLINA_TARGETS_OF_4EBP1_AND_4EBP2	Genes up-regulated in MEF cells (embryonic fibroblast) with double knockout of the translation repressors 4EBP1 [GeneID=1978] and 4EBP2 [GeneID=1979].
LIT_MM_NALAM_RB-CKO_SERTOLI-CELL_UP	UP Microarray Changes Comparing Rb cKO Sertoli Cells to Control for Genes Considered to Be Significantly Changed (Table S1; Pubmed:19819985)
LIT_MM_REINHOLDT_TS65DN_DIPLOID_SPERMATOCYTE_19-20DPP_UP	UP_Genes differentially expressed by 1.5 fold or more in enriched spermatocyte preparations from 19?0 dpp, Ts65Dn testes compared to that of wild type, diploid (WT) littermates. (Supplement 1B; Pubmed:19639331)
MIRNA_MM_WANG_MMU-MIR-219-2-3P	WANG_MMU-MIR-219-2-3P; Prediction of both conserved and nonconserved microRNA targets in animals 2008.
LIT_MM_MOISOI_HTRA2-KO_BRAIN_UP	UP_List of genes differentially expressed in brain tissue from HtrA2 KO mice compared to WT controls (Table S2; Pubmed:19023330)
LIT_MM_POLYMENIDOU_ADULT_BRAIN_TDP-43-DEPLETE_UP	Genes upregulated upon TDP-43 depletion in adult mouse brain (Table S1; Pubmed:21358643)
MSIGDB_MM_IWANAGA_CARCINOGENESIS_BY_KRAS_PTEN_DN	Cluster 2: genes down-regulated in lung tissue samples from mice with oncogenic form of KRAS [GeneID=3845] and inactivated PTEN [GeneID=5728].
LIT_MM_PETRI_NGN3-DEFICIENT_E13_DIFF	robust difference in expression levels between Ngn3-deficient and wild-type mice at e13--The effect of neurogenin3 deficiency on pancreatic gene expression in embryonic mice. (Table S2; Pubmed:17032746)
LIT_MM_HE_BM-CD48-LSK_BM-HSC_UP	Gene that are preferentially expressed in bone marrow CD48+LSK cells as compared to bone marrow HSCs (Table S2; Pubmed:21828271)
MIRNA_MM_WANG_MMU-MIR-5615-3P	WANG_MMU-MIR-5615-3P; Prediction of both conserved and nonconserved microRNA targets in animals 2008.
LIT_MM_GARCIA-ORTIZ_FETAL-OVARY_FOXL2-NULL_DN	Down in Foxl2-null (Additional file 8A; Pubmed:19538736)
MIRNA_MM_GRIMSON_MIR-124_124AB_506	GRIMSON_MIR-124_124AB_506; Predicted_Targets_Info; MicroRNA Targeting Specificity in Mammals: Determinants beyond Seed Pairing.
MSIGDB_MM_ZHANG_TLX_TARGETS_36HR_DN	Genes down-regulated in neural stem cells (NSC) at 36 h after cre-lox knockout of TLX (NR2E1) [GeneID=7101].
LIT_MM_SHETH_PAM2_TUMOR_LIVER_TXNIP-DEFICIENT_DIFF	PAM2-We used Affymetrix expression array chips (Mouse Genome 430A 2.0. array) to compare the transcript profiles of tumor and normal liver tissues of Txnipdeficient mice (Table S2; Pubmed:16607285)
LIT_MM_SMEETS_PPARALPHA_TAC_UP	UP_List of 1519 probeset only present in PPAR?-/- TAC versus wild-type TAC (Table SIV; Pubmed:18812456)
LIT_MM_RENTHAL_18.5DPC-DN-UTERINE_MIR-200B-C-429_DN	DN_compare sets of down-regulated uterine genes at 18.5 dpc with the strongest miR-200b/c/429 TargetScan context scores (Dataset S2; Pubmed:21079000)
GO_MF_MM_KINASE_ACTIVITY	GO:0016301 ; GO Term Name: kinase activity ; GO domain: molecular_function ; GO Evidence Code: IEA
LIT_MM_VAN-DER-PLUIJM_CHRONIC-GENOTOXIC-STRESS_16W_DN	down-Extensive overview of significant expression changes in 16-week old wild-type mice compared to 8-week-old mice,-chronic genotoxic stress (Table S5; Pubmed:17326724)
LIT_MM_BATTLE_GATA4-NULL_JEJUNUM_DN	DN_Genes with expression altered by ? 2.0 FOLD ( P ? 0.05) IN GATA4 null jejunum (Table S4; Pubmed:18812176)
LIT_MM_KIM_P-CHABAUDI_72H_NK-CELL_UP	List of NK cell-induced transcripts during P. chabaudi infection (Table S2; Pubmed:18824529)
MIRNA_MM_VERGOULIS_MMU-MIR-223-3P	VERGOULIS_MMU-MIR-223-3P; TarBase 6.0: capturing the exponential growth of miRNA targets with experimental support.
LIT_MM_OJAIMI_ENOS_MALE_UP	Up regulated in eNOS -/- male mice (Table S1; Pubmed:15879487)
LIT_MM_SHAROV_CALORIE-RESTRICTION_OVARY_6M_DIFF	6mo_Genes affected by calorie restriction in ovary at specific age (Additional file 14; Pubmed:18522719)
LIT_MM_NIEDERNHOFER_16W_VS_8W_GENOTOXIC-STRESS_DN	down-Extensive overview of signficant expression changes in 16-week old wild-type mice compared to 8-week-old mice, ranked in order of fold-change.-genotoxic stress (Table S6; Pubmed:17183314)
LIT_MM_STILLWELL_4M_MDX_PECTORALIS-MUSCLE_UP	UP_Comparison of gene expression profiles between 4 month-old mdx and WT pectoralis muscles (Table S1; Pubmed:19277212)
STITCH_MM_U0126-CID100005637	U0126(CID100005637) from STITCH (Search Tool for Interactions of Chemicals), data from GeneSetDB.
LIT_MM_LIN_TGF-BETA_GBM_NORMAL_BRAIN-TISSUE_DIFF	TGF beta related genes that are differentially expressed between GBM and normal brain tissues (FDR <0.1) (Table S8; Pubmed:20419098)
TFACTS_MM_CEBPA	Target genes of transcription factor CEBPA, predicted by TFactS, data from GeneSetDB.
GENESIGDB_MM_GIOVANNI_04_INTESTINE_DE	Mouse Intestine_DeGiovanni04_68genes; 14750170-Table2; data from GeneSigDB: http://compbio.dfci.harvard.edu/genesigdb/download/ALL_SIGSv4.gmt.
MSIGDB_MM_MARTINEZ_TP53_TARGETS_DN	Genes down-regulated in mice with skin specific knockout of TP53 [GeneID=7157].
LIT_MM_ZUBER_CIRCADIAN-TRANSCRIPTS_CD_DIFF	Circadian transcripts in CCD (Table S7; Pubmed:19805330)
LIT_MM_CHALLEN_UPPER-SPKLS-LY-HSC_LOWER-SPKLS-MY-HSC_UP	Upper-SPKLS Genes - Genes expressed >2-fold higher in upper-SPKLS HSCs compared to lower-SPKLS HSCs (Table S4; Pubmed:20207229)
MIRNA_MM_WANG_MMU-MIR-186-5P	WANG_MMU-MIR-186-5P; Prediction of both conserved and nonconserved microRNA targets in animals 2008.
LIT_MM_GIANNAKIS_CHAG-ASSOCIATED-KX1-ISOLATE_24H_MGEP-TRANSCRIPT_UP	UP_Differentially expressed mGEP transcripts after a 24h infection with the ChAG-associated Kx1 isolate. (Table S6; Pubmed:18332421)
LIT_MM_PANGAS_BR-SMAD-TUMOR_GRANULOSA_UP	153 Genes and ESTs significantly upregulated in BR-SMAD tumors (n=3) versus control granulosa cells (n=3) by microarray analysis (Table S2; Pubmed:17967875)
MIRNA_MM_GRIMSON_MIR-214_761_3619-5P	GRIMSON_MIR-214_761_3619-5P; Predicted_Targets_Info; MicroRNA Targeting Specificity in Mammals: Determinants beyond Seed Pairing.
TFACTS_MM_FOXO1	Target genes of transcription factor FOXO1, predicted by TFactS, data from GeneSetDB.
MSIGDB_MM_IVANOVA_HEMATOPOIESIS_STEM_CELL_LONG_TERM	Genes in the expression cluster 'LT-HSC Shared': up-regulated in long term hematopoietic stem cells (LT-HSC) from adult bone marrow and fetal liver.
LIT_MM_DUTERTRE_SPLICING-VARIANTS_PAIRED-COMPARISONS-OF-PRIMARY-TUMOR_DIFF	List of the splicing variants that were predicted to be differentially expressed by performing paired comparisons of primary tumors (Table S2; Pubmed:20103641)
LIT_MM_LINDSLEY_D4_DKK-PLUS_VS_DKK_DN	down-d4_Dkk+/d3_Dkk- (Table S1; Pubmed:18593559)
MSIGDB_MM_YAMAZAKI_TCEB3_TARGETS_DN	Genes down-regulated in embryonic stem cells from TCEB3 [GeneID=6924] knockout mice.
LIT_MM_KHO_PTCH_MB_TPC1-49.10_TPC2-13.68_LUNG_UP	tPC1 49.10% tPC2 13.68% Mouse Lung UP 373 genes twofold regulated in Ptch+/- mouse medulloblastomas and their respective mouse cerebellar and lung development signal and temporal (PC1-5) principal component representations, and their regulation in human medulloblastomas (Table S6; Pubmed:15075291)
MSIGDB_MM_MILI_PSEUDOPODIA_HAPTOTAXIS_UP	Transcripts enriched in pseudopodia of NIH/3T3 cells (fibroblast) in response to haptotactic migratory stimulus by fibronectin, FN1 [GeneID=2335].
MIRNA_MM_WANG_MMU-MIR-30D-5P	WANG_MMU-MIR-30D-5P; Prediction of both conserved and nonconserved microRNA targets in animals 2008.
MPO_MM_ABNORMAL_GLUCOSE_HOMEOSTASIS	abnormal glucose homeostasis from MPO (Mammalian Phenotype Ontology), data from GeneSetDB.
GO_CC_MM_MEMBRANE	GO:0016020 ; GO Term Name: membrane ; GO domain: cellular_component ; GO Evidence Code: IEA
LIT_MM_GIANNAKIS_KX1-SPECIFIC_24H_PROGENITOR-SPECIFIC-MGEP-TRANSCRIPT_DN	DN_Differentially expressed mGEP transcripts that are changed only after Kx1 infection and only in mGEPs (not npGECs). (Kx1-specific and progenitor-specific mGEP transcripts) (Table S10; Pubmed:18332421)
LIT_MM_FRIGERI_HU_BRAIN_UP	UP_All regulated genes in HU vs control brain (Table S1; Pubmed:18704384)
GO_CC_MM_MICROTUBULE	GO:0005874 ; GO Term Name: microtubule ; GO domain: cellular_component ; GO Evidence Code: IEA
LIT_MM_SPACH_CNS_EAE_UP	up-Genes whose expression in the CNS was altered by EAE (Table S1; Pubmed:15138306)
LIT_MM_BRUNSKILL_15.5_GLOMWT_ENDOTHELIAL-CELL_DN	DN [15.5] vs [glomwt]Differentially expressed endothelial genes. 786 genes with most distinct expression patterns across all endothelial cell samples (Suppl. Data S1; Pubmed:20706631)
LIT_MM_VOKES_SHH_LIMB_GLI-TARGET_CONTAINE-GLI-MOTIF_DIFF	containe-Gli-motifs_Identification of a core set of Shh-responsive limb gli target genes (Dataset S3; Pubmed:18832070)
MSIGDB_MM_GCNP_SHH_UP_LATE.V1_UP	Genes up-regulated in granule cell neuron precursors (GCNPs) after stimulation with Shh for 24h.
MIRNA_MM_WANG_MMU-MIR-330-3P	WANG_MMU-MIR-330-3P; Prediction of both conserved and nonconserved microRNA targets in animals 2008.
MSIGDB_MM_BRUINS_UVC_RESPONSE_VIA_TP53_GROUP_B	Category B genes: p53-dependent genes whose expression in the absence of S389 phosphorylation is dissimilar to loss of TP53 [GeneID=7157] in MEF (embryonic fibroblast) cells in response to UV-C irradiation.
MIRNA_MM_WANG_MMU-MIR-1964-5P	WANG_MMU-MIR-1964-5P; Prediction of both conserved and nonconserved microRNA targets in animals 2008.
LIT_MM_RENTHAL_COCAINE-HDAC5KO_COCAINE_DN	DN_List of Cocaine-Treated HDAC5 KO vs. Cocaine-Treated WT Significantly Regulated Gene (Table S2; Pubmed:17988634)
MIRNA_MM_GRIMSON_MIR-145	GRIMSON_MIR-145; Predicted_Targets_Info; MicroRNA Targeting Specificity in Mammals: Determinants beyond Seed Pairing.
STITCH_MM_CALCITRIOL-CID005280453	calcitriol(CID005280453) from STITCH (Search Tool for Interactions of Chemicals), data from GeneSetDB.
LIT_MM_GIRITHARAN_IN-VIVO_VS_ICSI-KSOM_UP	up-In vivo vs ICSI-KSOM comparison (Table S1; Pubmed:20889529)
LIT_MM_HONG_PCT-SHBG_PCT-SHBG-S42L_TESTOSTERONE_DHT_DN	DN_androgen-regulated genes the expression of which is either enhanced or suppressed by the presence of SHBG in PCT cells (Table S2; Pubmed:21193555)
LIT_MM_GERRITS_ILLUMINA_TARGET_CLUSTER5_DIFF	Cluster5 Clustering results (Table S1; Pubmed:19834560)
LIT_MM_IVANOVA_HSC-RELATED_ENRICHED-NSC-ESC_DIFF	Contains the complete list of HSC-related genes also enriched in NSC and/or ESC. (Excel Table S4; Pubmed:12228721)
SIDER_MM_CARDIAC_FAILURE	Cardiac failure from SIDER (SIDe Effect Resource), data from GeneSetDB.
LIT_MM_IVANOVA_PATTERN1_UP	up-regulated in Pattern1 (Table S27; Pubmed:16767105)
LIT_MM_NISHIYAMA_TF-MEF2C_ES-CELL_UP	Mef2c Genes up-regulated or down-regulated >=2 fold in response to manipulation of transcription factors (Table S3; Pubmed:19796622)
GO_BP_MM_NEGATIVE_REGULATION_OF_TRANSCRIPTION_FROM_RNA_POLYMERASE_II_PROMOTER	GO:0000122 ; GO Term Name: negative regulation of transcription from RNA polymerase II promoter ; GO domain: biological_process ; GO Evidence Code: IBA
GO_CC_MM_SOLUBLE_FRACTION	GO:0005625 ; GO Term Name: soluble fraction ; GO domain: cellular_component ; GO Evidence Code: ISO
LIT_MM_DE-SANTA_JMJD3_LPS-IFNGAMMA-4H_UP	UP Microarray data in wt vs. Jmjd3 -/- macrophages stimulated with LPS+IFN? for 4h (Table S9; Pubmed:19779457)
MIRNA_MM_BETEL_MMU-MIR-1952	BETEL_MMU-MIR-1952; Good mirSVR score Non-conserved; The microRNA.org resource: targets and expression.
MICROCOSM_TARGETS_MM_HSA-MIR-129	hsa-miR-129 from MicroCosm Targets, data from GeneSetDB.
CANCERGENES_MM_VOGELSTEIN_AND_KINZLER_2004	Vogelstein and Kinzler 2004 from CancerGenes, data from GeneSetDB.
KEGG_MM_PI3K-AKT_SIGNALING_PATHWAY	PI3K-Akt signaling pathway http://www.genome.jp/kegg-bin/show_pathway?mmu04151
LIT_MM_DING_PTENPC_ANTE-PS_15WK_UP	UP_Differentially expressed gene list was generated by a class comparison between WT (n=3) and Ptenpc-/- (n=5) anterior prostates(ante-PS) at 15 weeks of age (Dataset S1; Pubmed:21289624)
MIRNA_MM_BETEL_MMU-MIR-1966	BETEL_MMU-MIR-1966; Good mirSVR score Non-conserved; The microRNA.org resource: targets and expression.
LIT_MM_DARSIGNY_COLON_HNF4ALPHA-NULL_GE2_DN	DN_Genes modulated by ?2.0 in diseased Hnf4a null colon (Table S2; Pubmed:19898610)
MIRNA_MM_BETEL_MMU-MIR-1933-5P	BETEL_MMU-MIR-1933-5P; Good mirSVR score Non-conserved; The microRNA.org resource: targets and expression.
LIT_MM_KHO_PTCH_MB_TPC1-53.72_TPC2-16.30_CEREB_DN	tPC1 53.72% tPC2 16.30% Mouse Cereb DN 373 genes twofold regulated in Ptch+/- mouse medulloblastomas and their respective mouse cerebellar and lung development signal and temporal (PC1-5) principal component representations, and their regulation in human medulloblastomas (Table S6; Pubmed:15075291)
STITCH_MM_TESTOSTERONE-CID100005408	testosterone(CID100005408) from STITCH (Search Tool for Interactions of Chemicals), data from GeneSetDB.
LIT_MM_MARQUES_6W_SCHLAGER_HYPERTENSIVE_HYPOTHALAMUS_FDR001_UP	UP_Gene expression profile in hypothalamus of 6 week-old Schlager hypertensive mice, after false discovery rate adjustment of less than 0.001. (Table S4; Pubmed:21487032)
LIT_MM_ZAHN_C57BL_6_MULTIPLE-TISSUE_AGE_DN	DN_314 genes age-regulated in multiple mouse tissues (Table S5; Pubmed:18081424)
PANTHER_MM_INFLAMMATION_MEDIATED_BY_CHEMOKINE_AND_CYTOKINE_SIGNALING	Inflammation mediated by chemokine and cytokine signaling, a pathway that specifies the relationship between interacting proteins from panther.
MIRNA_MM_WANG_MMU-MIR-106A-3P	WANG_MMU-MIR-106A-3P; Prediction of both conserved and nonconserved microRNA targets in animals 2008.
MIRNA_MM_BETEL_MMU-MIR-1895	BETEL_MMU-MIR-1895; Good mirSVR score Conserved; The microRNA.org resource: targets and expression.
MIRNA_MM_BETEL_MMU-MIR-1931	BETEL_MMU-MIR-1931; Good mirSVR score Conserved; The microRNA.org resource: targets and expression.
SIDER_MM_PALPITATIONS	Palpitations from SIDER (SIDe Effect Resource), data from GeneSetDB.
LIT_MM_GIBBONS_344-SQ-ONLY_SYNGENEIC-TUMOR_DN	4 - down 344 SQ only,mRNA expression data for syngeneic tumors comparing 393P, 393LN and 344SQ (Table S2; Pubmed:19759262)
GO_BP_MM_RESPONSE_TO_ORGANIC_SUBSTANCE	GO:0010033 ; GO Term Name: response to organic substance ; GO domain: biological_process ; GO Evidence Code: IEA
MIRNA_MM_BETEL_MMU-MIR-1937A	BETEL_MMU-MIR-1937A; Good mirSVR score Non-conserved; The microRNA.org resource: targets and expression.
LIT_MM_SALOMONIS_AES_AS_TERM_NP-UTERUS_DN	DN term_vs_NP uterus,NP,nonpregnant; MG, midgestation; PP, postpartum.Combined analysis of these datasets with the same AltAnalyze parameters showed a wide range in the number of predicted AEs(alternative exons),Resulting data for unique genes associated with AEs were compared for datasets indicative of AS(alternative splicing), Unique alternative exon profiles with ES cell differentiation (Datas…
GO_BP_MM_RESPONSE_TO_DNA_DAMAGE_STIMULUS	GO:0006974 ; GO Term Name: response to DNA damage stimulus ; GO domain: biological_process ; GO Evidence Code: ISS
CTD_MM_2-3-DIMETHOXY-1-4-NAPHTHOQUINONE	2,3-dimethoxy-1,4-naphthoquinone from CTD (Comparative Toxicogenomics Database), data from GeneSetDB.
LIT_MM_SCHULZ_1-24H-LEP_1-24H-CON_TROPHOBLAST-CELL_DN	DN_All genes whose expression changes over 24 h were significantly different in leptin-treated and control trophoblast cells. (1-24h Lep)-(1-24h Con) (Supp Data-Interaction; Pubmed:19038858)
LIT_MM_TOLGYESI_OVA_31D_LUNG_UP	UP_gene list containing transcripts which showed at least >2.0-fold statistically differential expression in group 3 relative to the common reference control (Table S5; Pubmed:19556304)
MIRNA_MM_WANG_MMU-MIR-223-3P	WANG_MMU-MIR-223-3P; Prediction of both conserved and nonconserved microRNA targets in animals 2008.
LIT_MM_GULATI_CD45-SP_VS_INTACT-JEJUNUM_CELL-FRACTION_UP	Affymetix Probeset Enriched in the CD45-/SP Cell Fraction (Table S1; Pubmed:18006601)
LIT_MM_SELMAN_WHITE-ADIPOSE_S6K_UP	Genes upregulated in white adipose tissue of S6K-/- mice compared to wild type mice (Table S4a; Pubmed:19797661)
MIRNA_MM_GRIMSON_MIR-653	GRIMSON_MIR-653; Nonconserved_Family_Info; MicroRNA Targeting Specificity in Mammals: Determinants beyond Seed Pairing.
LIT_MM_AYDIN_PREFRONTAL-CORTEX_APLP2_DIFF	WTAPLP2_significant probe sets (R6 animals) resulting from the pairwise significance analyses (Additional file 2; Pubmed:21435241)
MIRNA_MM_BETEL_MMU-MIR-423-3P	BETEL_MMU-MIR-423-3P; Good mirSVR score Non-conserved; The microRNA.org resource: targets and expression.
MIRNA_MM_BETEL_MMU-MIR-191	BETEL_MMU-MIR-191; Good mirSVR score Conserved; The microRNA.org resource: targets and expression.
LIT_MM_CHIOSSONE_CD11B-LOW_CD27-LOW_NK-CELL_DN	DN_Genes differentially expressed between CD11blow and CD27low NK cell subset (Table S1; Pubmed:19234143)
LIT_MM_LANGLAIS_LIF_GC_CLUSTER3_DIFF	Cluster 3,List of gene annotations attributed by DAVID web site for each cluster (Table S3; Pubmed:18927629)
LIT_MM_LEE_BDC-CD4-TCELL_TNF_PBS_DN	genes display significant down-regulation by TNF treatment (Dataset S1; Pubmed:18632574)
STITCH_MM_NOREPINEPHRINE-CID000439260	norepinephrine(CID000439260) from STITCH (Search Tool for Interactions of Chemicals), data from GeneSetDB.
MSIGDB_MM_DARWICHE_SQUAMOUS_CELL_CARCINOMA_DN	Genes down-regulated in squamous cell carcinoma (SCC) compared to normal skin.
LIT_MM_MIJALSKI_16DUAL-COLOR_HYBRIDIZATIONS_LIVER_UP	high in liver-List of the top differentially regulated transcripts based on 16 dual color DNA-chip hybridizations of liver and kidney cDNAs. DNA-chip hybridizations are numbered as in Table 1. (Table S2; Pubmed:15939889)
MIRNA_MM_VERGOULIS_MMU-MIR-541-5P	VERGOULIS_MMU-MIR-541-5P; TarBase 6.0: capturing the exponential growth of miRNA targets with experimental support.
LIT_MM_HE_BM-HSC_BM-CD48-LSK_UP	Gene that are preferentially expressed in bone marrow HSC as compared to bone marrow CD48+LSK cells (Table S2; Pubmed:21828271)
LIT_MM_LACAZE_IFI47_IFN-RISCFREE_IFN_RNAI_DN	DN Ifi47_IFN- vs. Riscfree_IFN-,RNAi gene expression clusters (Addi. file 8; Pubmed:19664281)
MSIGDB_MM_IVANOVA_HEMATOPOIESIS_STEM_CELL_AND_PROGENITOR	Genes in the expression cluster 'HSC and Progenitors Shared': up-regulated in hematopoietic stem cells (HSC) and progenitors from adult bone marrow and fetal liver.
LIT_MM_FUKADA_QUIESCENT-SATELLITE-CELL_VS_SATELLITE-CELL_UP	The genes that are up-regulated (> 5-fold) in quiescent satellite cells compared with activated satellite cells (Table S1; Pubmed:17600112)
MIRNA_MM_BETEL_MMU-MIR-323-5P	BETEL_MMU-MIR-323-5P; Good mirSVR score Non-conserved; The microRNA.org resource: targets and expression.
LIT_MM_GEBEL_CS-EXPOSURE_KO-5M-1D-PE_UP	UP ko 5 m + 1 d pe,the strong impact of CS(Cigarette Smoke) exposure on the transcriptome of rodent lung tissue cells (Table S1; Pubmed:20133372)
MIRNA_MM_WANG_MMU-MIR-326-3P	WANG_MMU-MIR-326-3P; Prediction of both conserved and nonconserved microRNA targets in animals 2008.
MIRNA_MM_WANG_MMU-MIR-30E-5P	WANG_MMU-MIR-30E-5P; Prediction of both conserved and nonconserved microRNA targets in animals 2008.
MIRNA_MM_WANG_MMU-MIR-881-5P	WANG_MMU-MIR-881-5P; Prediction of both conserved and nonconserved microRNA targets in animals 2008.
LIT_MM_CHAMBERS_N.ER_DIFF	N.er -genes uniquely expressed in a single cell type (Table S3; Pubmed:18371395)
LIT_MM_TABIBIAZAR_VASCULAR-WALL_VASCULAR_C57_UP	Higher Baseline Expression in C57 mice (Table S1; Pubmed:15550693)
LIT_MM_YUAN_APOE_VS_C3H.APOE_WESTERN-DIET_AORTIC-WALL_UP	UP Differentially expressed genes in the aortic wall of B6.apoE-/- and C3H.apoE-/- mice fed a Western diet (Table S2; Pubmed:19304945)
STITCH_MM_PACLITAXEL-CID100004666	paclitaxel(CID100004666) from STITCH (Search Tool for Interactions of Chemicals), data from GeneSetDB.
LIT_MM_TOMCZAK_MYOGENIC_2D_C1_DIFF	List of Affymetrix probe sets classified into Group I clusters. All fold change values are relative to day -2. (Table S1; Pubmed:14688207)
LIT_MM_PLASARI_10H-TGF-BETA1_POTENTIAL_CONNECTIVE-TISSUE-DEVELOPMENT-AND-FUNCTION_DIFF	10h TGF-?1 treated vs untreated Potential TGF-?1 target genes belonging to the onnective tissue development and function?category (Table S6; Pubmed:19752192)
LIT_MM_ABEL_TESTICULAR-TRANSCRIPT_FSH_12H_DN	DN at 12h_Effects of FSH treatment on testicular transcript levels (Table S2B-A; Pubmed:19136570)
MIRNA_MM_WANG_MMU-MIR-5107	WANG_MMU-MIR-5107; Prediction of both conserved and nonconserved microRNA targets in animals 2008.
MICROCOSM_TARGETS_MM_HSA-MIR-149	hsa-miR-149 from MicroCosm Targets, data from GeneSetDB.
LIT_MM_KOIRALA_DEVELOPMENTALLY-BERGMANN-GLIA_P6-GT-P30_DIFF	present at P6 and absent at P30 Developmentally-regulated Bergmann glia genes (P6>P30 by >3-fold, or present at P6 and absent at P30) (Table S1 ; Pubmed:20169146)
LIT_MM_GU_ENRICHED-NGN3-CELL_VS_NGN3-E13.5_DIFF	5b: genes present or enriched in NGN3?cells versus NGN3+ cells (E13.5) (Table S5; Pubmed:14660441)
LIT_MM_KARANTZALI_ESC_NANOG_SALL1_COMMON-TARGET_DIFF	common_Gene targets of Sall1 and Nanog (Table S1; Pubmed:21062744)
STITCH_MM_HYDRIDE_ACETATE-CID020274032	hydride acetate(CID020274032) from STITCH (Search Tool for Interactions of Chemicals), data from GeneSetDB.
LIT_MM_KATSANOU_HUR-DEFICIENT_MEF_DN	reduced expression in HuR-deficient MEF with a p-value <0,05 and Fold Change < -1,5. (Table S3a; Pubmed:19307312)
LIT_MM_BOULIAS_HEPATIC-METABOLIC_ORPHAN-NUCLEAR-RECEPTOR-SHP_DN	down-Regulation of hepatic metabolic pathways by the orphan nuclear receptor SHP (Table S1; Pubmed:15973435)
LIT_MM_WILDE_HF-FEEDING_3D_DN	DN_Significantly changed genes (fold change > 1.3 and a raw p-value < 0.05) after 3 days of HF-feeding (Table S1-Table1; Pubmed:18042831)
MIRNA_MM_BETEL_MMU-MIR-1195	BETEL_MMU-MIR-1195; Good mirSVR score Conserved; The microRNA.org resource: targets and expression.
LIT_MM_CAHOY_ASTROCYTE-SPECIFIC_UP	Genes statistically enriched in astrocytes. (Table S4; Pubmed:18171944)
MIRNA_MM_WANG_MMU-MIR-296-3P	WANG_MMU-MIR-296-3P; Prediction of both conserved and nonconserved microRNA targets in animals 2008.
MIRNA_MM_WANG_MMU-MIR-450B-3P	WANG_MMU-MIR-450B-3P; Prediction of both conserved and nonconserved microRNA targets in animals 2008.
LIT_MM_MITCHELL_RAS_HEART_UP	up-RAS COMPARE_RESULT--transgenic vs.control hearts. (Table S2; Pubmed:16368875)
LIT_MM_ENGELEN_SOX2_CHD7_DIFF	Genes regulated by Sox2 and Chd7. (Table S4; Pubmed:21532573)
MIRNA_MM_VERGOULIS_MMU-MIR-181A-5P	VERGOULIS_MMU-MIR-181A-5P; TarBase 6.0: capturing the exponential growth of miRNA targets with experimental support.
GO_MF_MM_RECEPTOR_BINDING	GO:0005102 ; GO Term Name: receptor binding ; GO domain: molecular_function ; GO Evidence Code: IPI
LIT_MM_TIMMONS_DIFFERENTIATION_BROWN-PREADIPOCYTE-UNIQUE_DN	DN_BAT-unique_Overlapping gene list from brown and white preadipoctyes modulated during differentiation (Dataset S3; Pubmed:17360536)
MIRNA_MM_BETEL_MMU-MIR-505	BETEL_MMU-MIR-505; Good mirSVR score Non-conserved; The microRNA.org resource: targets and expression.
LIT_MM_MILENKOVIC_APOE_UP	up-ApoE -/- --- List of differentially expressed mRNAs (Table S5; Pubmed:22253797)
MIRNA_MM_WANG_MMU-MIR-3073-5P	WANG_MMU-MIR-3073-5P; Prediction of both conserved and nonconserved microRNA targets in animals 2008.
MSIGDB_MM_ZHANG_TLX_TARGETS_60HR_DN	Genes down-regulated in neural stem cells (NSC) at 60 h after cre-lox knockout of TLX (NR2E1) [GeneID=7101].
LIT_MM_CAHOY_NEURON-SPECIFIC_UP	Genes statistically enriched in neurons (Table S6; Pubmed:18171944)
MSIGDB_MM_SWEET_LUNG_CANCER_KRAS_UP	Genes up-regulated in the Kras2LA mouse lung cancer model with mutated KRAS [GeneID=3845].
MIRNA_MM_WANG_MMU-MIR-1224-3P	WANG_MMU-MIR-1224-3P; Prediction of both conserved and nonconserved microRNA targets in animals 2008.
MSIGDB_MM_TORCHIA_TARGETS_OF_EWSR1_FLI1_FUSION_DN	Genes down-regulated in leukemic progenitor cells expressing activated fusion of ESWR1 and FLI1 [GeneID=2130, 2313] compared to normal hematopoetic progenitors.
LIT_MM_NISHIYAMA_TF-SOX9_ES-CELL_DN	Sox9 Genes up-regulated or down-regulated >=2 fold in response to manipulation of transcription factors (Table S3; Pubmed:19796622)
LIT_MM_MAHERALI_HISTONE-METHYLATION_ES_MEF_IPS_MEF_DIFF	Histone methylation pattern of 2D4 iPS cells resembles that of ES cells (Table S4; Pubmed:18371336)
MIRNA_MM_BETEL_MMU-MIR-361	BETEL_MMU-MIR-361; Good mirSVR score Non-conserved; The microRNA.org resource: targets and expression.
LIT_MM_LIU_SJL_J_DIFF	List of 224 genes whose expression profile was unique to SJL/J mice (Table S3(A) ; Pubmed:19923254)
GENESIGDB_MM_CASTELLANO_07_STEM_CELL_2	Mouse StemCell_Castellano07_104genes; 16909116-Table2; data from GeneSigDB: http://compbio.dfci.harvard.edu/genesigdb/download/ALL_SIGSv4.gmt.
LIT_MM_SI_KIDNEY_DOXORUBICIN_BALB_C_M_F_UP	UP_List of differentially expressed transcripts in kidneys of doxorubicin treated Balb/c male and female mice (Table S2; Pubmed:19277126)
LIT_MM_STEGMANN_MEDIUM-ENDODERM_VS_LOW-VILLI_PRIMO-DATABASE_DN	Genes that are down-regulated from a medium level of expression in the endoderm to a low level of expression in the villi and that have promoters in the PRIMO database. The fold change column indicates the down-regulation from endoderm to villus (Table S7; Pubmed:16868071)
LIT_MM_GIANNAKIS_5-CHAG_NOT-NORMAL-GASTRIC-HISTOLOGY-OR-HEAT-KILLED-BACTERIA_MGEP_UP	UP ChAG-associated signature response of mGEP cells: 695 transcripts that are differentially expressed upon infection with all 5 ChAG strains but not with the strain associated with normal gastric histology, or with heat-killed bacteria (Table S4; Pubmed:19723631)
SIDER_MM_BRADYCARDIA	Bradycardia from SIDER (SIDe Effect Resource), data from GeneSetDB.
MIRNA_MM_GRIMSON_MIR-132_212_212-3P	GRIMSON_MIR-132_212_212-3P; Predicted_Targets_Info; MicroRNA Targeting Specificity in Mammals: Determinants beyond Seed Pairing.
MIRNA_MM_WANG_MMU-MIR-208A-5P	WANG_MMU-MIR-208A-5P; Prediction of both conserved and nonconserved microRNA targets in animals 2008.
MIRNA_MM_WANG_MMU-MIR-465B-5P	WANG_MMU-MIR-465B-5P; Prediction of both conserved and nonconserved microRNA targets in animals 2008.
GO_BP_MM_IN_UTERO_EMBRYONIC_DEVELOPMENT	GO:0001701 ; GO Term Name: in utero embryonic development ; GO domain: biological_process ; GO Evidence Code: IGI
MSIGDB_MM_GRAESSMANN_APOPTOSIS_BY_SERUM_DEPRIVATION_DN	Genes down-regulated in ME-A cells (breast cancer) undergoing apoptosis upon serum starvation (5% to 0% FCS) for 22 hr.
MSIGDB_MM_SERVITJA_LIVER_HNF1A_TARGETS_UP	Genes up-regulated in liver tissue upon knockout of HNF1A [GeneID=6927].
LIT_MM_ZENG_1-CELL-TRANSIENT_PREIMPLANTATION_DIFF	Genes with 1-cell transient expression profile (Table S2-C; Pubmed:15282163)
LIT_MM_PORTER_MDX_HINDLIMB_MUSCLE_DIFF	Transcripts differentially expressed in mdx hindlimb muscle (Table S1; Pubmed:12874102)
LIT_MM_JOHN_MAMMARY-3134_HORMONE_DIFF	3134 hormone_Expression analysis of mammary (3134) and pituitary (AtT-20) cells (Table S5; Pubmed:21258342)
LIT_MM_LIN_HAIR-CYCLE_TIME-COURSE_C5_1ST-HAIR-GROWTH-CYCLE_DIFF	1st-cluster5_Time-course profile clustering of hair-cycle regulated genes. (Table S1; Pubmed:19629164)
LIT_MM_LIN_ESC_C-MYC_MIR-302_TARGET_DIFF	miR-302_targets of indicated miRNAs and the overlap signatures of both miRNA targets and c-Myc overexpression (Table S3; Pubmed:19745813)
LIT_MM_MARET_BRAIN_CONTROL-CONDITION_TIME-OF-DAY-PATTERN_DIFF	2032 rhythmic expressed genes under control conditions (Table S3; Pubmed:18077435)
LIT_MM_CHEN_FEMALE-LIVER-CONNECTIVITY-MAP_DIFF	Genes and sub-networks in the female liver connectivity map depicted in Supplementary Figure 3A of the Supplementary Information. (Table S6; Pubmed:18344982)
LIT_MM_HEIMAN_BRAIN-STEM-CHOLINERGIC-MOTOR-NEURON_UP	Top 1000 Brain Stem Cholinergic Motor Neuron Translated mRNAs Enriched When Compared to a Reference Sample (Table S24; Pubmed:?9013281)
CTD_MM_ZIDOVUDINE	Zidovudine from CTD (Comparative Toxicogenomics Database), data from GeneSetDB.
LIT_MM_GULATI_CD45-SP_VS_INTACT-JEJUNUM_CELL-FRACTION_DN	Affymetix Probeset De-enriched in the CD45-/SP Cell Fraction (Table S2; Pubmed:18006601)
MIRNA_MM_WANG_MMU-MIR-590-3P	WANG_MMU-MIR-590-3P; Prediction of both conserved and nonconserved microRNA targets in animals 2008.
MIRNA_MM_GRIMSON_MIR-5136	GRIMSON_MIR-5136; Conserved_Family_Info; MicroRNA Targeting Specificity in Mammals: Determinants beyond Seed Pairing.
LIT_MM_MAJEWSKI_SUZ12PLT8MPL_FETAL-LSK_UP	UP Fetal LSK Suz12Plt8/+ Mpl+/+ vs wild-type log-ratios,Fetal and adult LSK log-ratios (Table S4; Pubmed:20445021)
MIRNA_MM_WANG_MMU-MIR-1894-5P	WANG_MMU-MIR-1894-5P; Prediction of both conserved and nonconserved microRNA targets in animals 2008.
SIDER_MM_FLUID_RETENTION	Fluid retention from SIDER (SIDe Effect Resource), data from GeneSetDB.
LIT_MM_SIEVERTZON_NEUROSPHERE_VS_DIFFERENTIATED-CELL-F-G_UP	up-Genes differentially expressed in the neurosphere vs. differentiated cells comparison (F-G). Genes with p < 0.001, calculated by empirical Bayes moderated t-test and false discovery rate adjustment, are included. (Table S1; Pubmed:15833137)
LIT_MM_FORSBERG_LT-HSC_VS_MPP_UP	Transcripts Upregulated in LT-HSC Compared to MPP (Table S4; Pubmed:16151515)
MIRNA_MM_WANG_MMU-MIR-3475	WANG_MMU-MIR-3475; Prediction of both conserved and nonconserved microRNA targets in animals 2008.
MIRNA_MM_WANG_MMU-MIR-31-5P	WANG_MMU-MIR-31-5P; Prediction of both conserved and nonconserved microRNA targets in animals 2008.
SIDER_MM_PNEUMOCYSTIS_CARINII_PNEUMONIA	Pneumocystis carinii pneumonia from SIDER (SIDe Effect Resource), data from GeneSetDB.
MIRNA_MM_WANG_MMU-MIR-1953	WANG_MMU-MIR-1953; Prediction of both conserved and nonconserved microRNA targets in animals 2008.
LIT_MM_MILENKOVIC_HESPERIDINE_DN	down-Hesperidine --- List of differentially expressed mRNAs (Table S5; Pubmed:22253797)
HPO_MM_IMPAIRED_VISION	Impaired vision from HPO (Human Phenotype Ontology), data from GeneSetDB.
LIT_MM_WU_BXH-APOE-NULL-F2-USF1-SIGNATURE_FEMALE_DIFF	Female BXH ApoE null F2 Usf1 signature gene sets (Table S5; Pubmed:19995791)
LIT_MM_KIDDER_SMARCA4-BOUND-REGIONS_TS-CELL_DIFF	SMARCA4 bound regions in murine TS cells (Table S2; Pubmed:20176728)
LIT_MM_CASTELLANO_G0-ARRESTED-H-RAS_N-RAS_SERUM-STARVED-1H_DIFF	Differential gene expression in serum-starved, G0-arrested H-ras-/-/N-ras-/- fibroblasts after incubation of cell cultures in the presence of serum for 1 hour (Table S6; Pubmed:19895680)
LIT_MM_WELLE_MYOSTATIN_MUSLE_UP	UP Excel file listing probe sets showing differential expression between myostatin knockout and control mice at nominal P < 0.01 (Table S1; Pubmed:19509079)
LIT_MM_FORSBERG_ST-HSC_VS_LT-HSC_UP	Transcripts Upregulated in ST-HSC Compared to LT-HSC (Table S1; Pubmed:16151515)
LIT_MM_DESCOT_CYTOCHALASIND_LATRUNCULINB_CYCLOHEXIMIDE_DIFF	Differentially Expressed Genes in Cells Treated with Cytochalasin D, Latrunculin B, and Cycloheximide Only (Table S1; Pubmed:19683494)
LIT_MM_RAKHSHANDEHROO_WY14643-6H_24H_DN	DN Overlapping and species-specific list of significantly upregulated (1_1) and downregulated (1_2) genes in mouse and human primary hepatocytes after treatment with Wy14643 (6 h and/or 24 h) (Table S1 ; Pubmed:19710929)
LIT_MM_DONZE_PKR_DN	down-List of genes regulated by PKR (Table SA; Pubmed:14749731)
MIRNA_MM_GRIMSON_MIR-203	GRIMSON_MIR-203; Predicted_Targets_Info; MicroRNA Targeting Specificity in Mammals: Determinants beyond Seed Pairing.
GO_MF_MM_PROTEIN_HETERODIMERIZATION_ACTIVITY	GO:0046982 ; GO Term Name: protein heterodimerization activity ; GO domain: molecular_function ; GO Evidence Code: IPI
LIT_MM_TSENG_IRS-1-KO_DN	down-significantly altered at basal state between WT and IRS-1 KO cells. (Table S1; Pubmed:15895078)
MIRNA_MM_WANG_MMU-MIR-298-5P	WANG_MMU-MIR-298-5P; Prediction of both conserved and nonconserved microRNA targets in animals 2008.
MIRNA_MM_GRIMSON_MIR-141_200A	GRIMSON_MIR-141_200A; Predicted_Targets_Info; MicroRNA Targeting Specificity in Mammals: Determinants beyond Seed Pairing.
GENESIGDB_MM_LU_06_LUNG_ARRAY_MG	Mouse Lung_Lu06_856genes_Array MG_U74Av2; 16488994-SuppTable1a; data from GeneSigDB: http://compbio.dfci.harvard.edu/genesigdb/download/ALL_SIGSv4.gmt.
LIT_MM_VISEL_VIVO_P300_FOREBRAIN_UP	Forebrain Over-Expressed Genes (Table S8; Pubmed:?9212405)
MIRNA_MM_GRIMSON_MIR-320ABCD_4429	GRIMSON_MIR-320ABCD_4429; Predicted_Targets_Info; MicroRNA Targeting Specificity in Mammals: Determinants beyond Seed Pairing.
LIT_MM_POGOZELSKI_MOTOR-NERVE-STIMULATION-IN-TIBIALIS_P38GAMMA-MKO_SKELETAL-MUSCLE_UP	The probesets, gene names and symbols for the cluster of genes whose stimulation-induced change is increased in the p38? MKO mice when compared with wild type littermates (Table S4; Pubmed:19936205)
LIT_MM_ZUBER_CCD_DIFF	Transcripts differentially expressed in CCD (Table S4; Pubmed:19805330)
LIT_MM_BROWN_OPTIC-FISSURE_E10.5_E12.5_DIFF	Probe set significantly regulated over E10.5 to E12.5 in mouse optic fissure (Table S1; Pubmed:19171890)
MIRNA_MM_BETEL_MMU-MIR-509-5P	BETEL_MMU-MIR-509-5P; Good mirSVR score Non-conserved; The microRNA.org resource: targets and expression.
LIT_MM_CAHOY_MOG-MYELINATING-OLS_MOG_OLS_UP	Genes statistically enriched in MOG+ myelinating OLs compared to MOG- Ols (Table S19; Pubmed:18171944)
LIT_MM_CHALLEN_GFP-VE-URETERIC-TREE_VS_GFP-VE-CELL-POPULATION_DN	down-Triplicate microarray profiling of sorted GFP ve ureteric tree vs. the remaining GFP ve cell population was performed, and differential expression was defined using B statistics. All genes with a B score 0 were annotated using DAVID (Table S6; Pubmed:15998744)
LIT_MM_FAZZIO_ESC_TIP60-KD_P400-KD_NANOGKD_DIFF	Overlap of Nanog anf Tip60-p400 expression dataset (Table S6b; Pubmed:18614019)
LIT_MM_HUANG_UBE2F_CTR_DN	Differential expression in any comparison; Ube2f versus Ctr (Table S5; Pubmed:19250909)
LIT_MM_LAIFENFELD_4H-HYPOXIA_2-BE_SPLEEN_UP	UP Molecular response to hypoxia in the spleen 4 h following a single dose of 2-BE based on CNM (Table S3,Figure 2B; Pubmed:19812364)
LIT_MM_LUKAS_MOUSE-SPINAL-CORD_DIFF	Relative Protein expression in Mouse Spinal Cord (Table S1; Pubmed:16571896)
MSIGDB_MM_CHIARADONNA_NEOPLASTIC_TRANSFORMATION_KRAS_UP	Genes up-regulated in transformed NIH3T3 cells (fibroblasts transformed by activated KRAS [GeneID=3845]) vs normal cells.
GENESIGDB_MM_CRAWFORD_07_BREAST_1	Mouse Breast_Crawford07_758genes; 18081427-TableS7; data from GeneSigDB: http://compbio.dfci.harvard.edu/genesigdb/download/ALL_SIGSv4.gmt.
LIT_MM_BOTTOMLY_STRIATUM_B6_D2_RNA-SEQ_DN	B6/D2_DN_RNA-Seq results of all genes detected and comparisons to Affymetrix and Illumina microarray data. (Dataset S1; Pubmed:21455293)
LIT_MM_NISHIYAMA_TF-SOX2_ES-CELL_UP	Sox2 Genes up-regulated or down-regulated >=2 fold in response to manipulation of transcription factors (Table S3; Pubmed:19796622)
MIRNA_MM_GRIMSON_MIR-143_1721_4770	GRIMSON_MIR-143_1721_4770; Predicted_Targets_Info; MicroRNA Targeting Specificity in Mammals: Determinants beyond Seed Pairing.
MIRNA_MM_BETEL_MMU-MIR-1983	BETEL_MMU-MIR-1983; Good mirSVR score Non-conserved; The microRNA.org resource: targets and expression.
L2L_MM_STEMCELL_HEMATOPOIETIC_UP	Enriched in mouse hematopoietic stem cells, compared to differentiated brain and bone marrow cells
MIRNA_MM_WANG_MMU-MIR-3064-5P	WANG_MMU-MIR-3064-5P; Prediction of both conserved and nonconserved microRNA targets in animals 2008.
MSIGDB_MM_DARWICHE_PAPILLOMA_RISK_LOW_DN	Genes down-regulated during skin tumor progression from low risk papilloma vs normal skin.
LIT_MM_LEE_MF-PIK3CB_PROSTATE_DN	dn Up?or down?regulated genes found only in MF?PIK3CB transgenic mice (Table S2; Pubmed:20534477)
MIRNA_MM_BETEL_MMU-MIR-668	BETEL_MMU-MIR-668; Good mirSVR score Non-conserved; The microRNA.org resource: targets and expression.
MIRNA_MM_WANG_MMU-MIR-29B-1-5P	WANG_MMU-MIR-29B-1-5P; Prediction of both conserved and nonconserved microRNA targets in animals 2008.
MIRNA_MM_WANG_MMU-MIR-33-5P	WANG_MMU-MIR-33-5P; Prediction of both conserved and nonconserved microRNA targets in animals 2008.
LIT_MM_KIM_ALB-CRE_HIF2DPA_ALB-CRE_LIVER_UP	Top 200 gene upregulated in Alb-Cre; HIF2dPA livers relative to Alb-Cre control livers (Table S1; Pubmed:16977322)
LIT_MM_HUGHES_12H_LIVER_CYCLING-GENE_DIFF	12 h cycling genes (Table S2; Pubmed:19343201)
LIT_MM_CHEN_FOXP3-SCURFY-MUTATION_DIABETES_UP	up-Tr/Tc MLN-Specific genes identified by microarray analysis of Treg and Teff cells (Table S1; Pubmed:16301745)
MIRNA_MM_BETEL_MMU-MIR-599	BETEL_MMU-MIR-599; Good mirSVR score Non-conserved; The microRNA.org resource: targets and expression.
GENESIGDB_MM_ESCUDERO_10_STEM_CELL_GARCIA	Mouse StemCell_GarciaEscudero10_311genes_p53; 20630075-AF-3; data from GeneSigDB: http://compbio.dfci.harvard.edu/genesigdb/download/ALL_SIGSv4.gmt.
MSIGDB_MM_RB_P107_DN.V1_UP	Genes up-regulated in primary keratinocytes from RB1 and RBL1 [Gene ID=5925, 5933] skin specific knockout mice.
METHYCANCER_MM_LUNG_SMALL_CELL_CANCER	Lung: small cell cancer from MethyCancer, data from GeneSetDB.
LIT_MM_WU_ES_TET1-DEPLETED_UP	UP_Differentially expressed genes between control and Tet1-depleted ES cells (Table S5; Pubmed:21451524)
MIRNA_MM_BETEL_MMU-MIR-324-3P	BETEL_MMU-MIR-324-3P; Good mirSVR score Non-conserved; The microRNA.org resource: targets and expression.
LIT_MM_THOMAS_14M-DE5_NO-R6_2_STRIATUM_UP	UP_Genes selectively altered in their expression in DE5 trangenic mice, but not in R6/2 mice (Table S2; Pubmed:21177255)
MSIGDB_MM_DARWICHE_PAPILLOMA_RISK_HIGH_DN	Genes down-regulated during skin tumor progression from normal skin to high risk papilloma.
LIT_MM_PATKE_TOTAL-PLUS_VS_MINUS_BAFF_B-CELL_METABOLIC_DN	up-Total plus versus minus (Table S2; Pubmed:17060474)
LIT_MM_HAMZA_ADIPOCYTE-DIFFERENTIATION_D2-D6_SIRNA-NON-TARGET_SIRNA-PPARG_DIFF	Genes that are differentialy expressed during adipocyte differentiation on day -2 to 6 between cells treated with siRNA non-targeting versus siRNA PPARg (Spreadsheet S1; Pubmed:19300518)
[truncated: 2,248 more rows]
